# Supplementary material for: Authorial and institutional stratification in open access publishing: the case of global health research
Source: PeerJ. 2018 Feb 19;6:e4269. doi: 10.7717/peerj.4269 (PMC5822836; doi:10.7717/peerj.4269)
Supplement: Supplemental Information 1 [file peerj-06-4269-s001.xlsx]

## Sheet: Data
id_art	titre	Revue	Nb_Auteur	Nb_Adresse	accesscat	largeraccesscat	authororder	Nom	Nom_Famille	Prenom	Role	addressorder	institution	cleanname	cleanname_univ_hosp	inst_type_general	inst_type3	is_last	apc_paid	delayed	goldAPC	goldFree	green	hybrid	closed	company	govt	hospital	nonprofit	resinst	sciass	univ125	univ2650	univ51100	univ101200	univ201500	univ501plus	univunranked	univ	univtop50	pay	type
43911006	Application of a Partnership Model for Transformative and Sustainable International Development	PUBLIC HEALTH NURSING	4	2	Toll access article	Toll access	1	Powell-DL	Powell	Dorothy L.	Author, Reprint Author	1	DUKE-UNIV	DUKE-UNIV	DUKE-UNIV	University	University - Rank 001-025	0	0	0	0	0	0	0	1	0	0	0	0	0	0	1	0	0	0	0	0	0	1	1	0	Article
43915188	How to Ensure Nutrition Security in the Global Economic Crisis to Protect and Enhance Development of Young Children and Our Common Future	JOURNAL OF NUTRITION	9	9	Hybrid article	Hybrid	1	dePee-S	de Pee	Saskia	Author, Reprint Author	1	WORLD-FOOD-PROGRAMME	WORLD-FOOD-PROGRAMME	WORLD-FOOD-PROGRAMME	Non-profit	Non-profit	0	5000	0	0	0	0	1	0	0	0	0	1	0	0	0	0	0	0	0	0	0	0	0	1	Article
43915191	High Food Prices and the Global Financial Crisis Have Reduced Access to Nutritious Food and Worsened Nutritional Status and Health	JOURNAL OF NUTRITION	5	5	Hybrid article	Hybrid	1	Brinkman-HJ	Brinkman	Henk-Jan	Author, Reprint Author	1	WORLD-FOOD-PROGRAMME	WORLD-FOOD-PROGRAMME	WORLD-FOOD-PROGRAMME	Non-profit	Non-profit	0	5000	0	0	0	0	1	0	0	0	0	1	0	0	0	0	0	0	0	0	0	0	0	1	Article
43926177	Stopping tuberculosis in the 21st century: Goals and strategies	RESPIROLOGY	2	1	Toll access article	Toll access	1	Onozaki-I	Onozaki	Ikushi	Author, Reprint Author	1	WHO	WHO	WHO	Non-profit	Non-profit	0	0	0	0	0	0	0	1	0	0	0	1	0	0	0	0	0	0	0	0	0	0	0	0	Review
43933102	Is the prevalence of asthma declining? Systematic review of epidemiological studies	ALLERGY	4	2	Hybrid article	Hybrid	1	Anandan-C	Anandan	C.	Author	1	UNIV-EDINBURGH	UNIV-EDINBURGH	UNIV-EDINBURGH	University	University - Rank 026-050	0	4000	0	0	0	0	1	0	0	0	0	0	0	0	0	1	0	0	0	0	0	1	1	1	Review
43945450	GLOBAL NETWORKING FOR BIODOSIMETRY LABORATORY CAPACITY SURGE IN RADIATION EMERGENCIES	HEALTH PHYSICS	3	1	Green OA article	Green OA	1	Christie-DH	Christie	Derek H.	Author	1	WHO	WHO	WHO	Non-profit	Non-profit	0	0	0	0	0	1	0	0	0	0	0	1	0	0	0	0	0	0	0	0	0	0	0	0	Article
43948572	The optimal cutoff values and their performance of waist circumference and waist-to-hip ratio for diagnosing type II diabetes	EUROPEAN JOURNAL OF CLINICAL NUTRITION	2	2	Toll access article	Toll access	1	Qiao-Q	Qiao	Q.	Author, Reprint Author	1	UNIV-HELSINKI	UNIV-HELSINKI	UNIV-HELSINKI	University	University - Rank 051-100	0	0	0	0	0	0	0	1	0	0	0	0	0	0	0	0	1	0	0	0	0	1	0	0	Review
43957453	Neglected Tropical Diseases 2 Integration of control of neglected tropical diseases into health-care systems: challenges and opportunities	LANCET	7	3	Green OA article	Green OA	1	Gyapong-JO	Gyapong	John O.	Author, Reprint Author	1	GHANA-HLTH-SERV	GHANA-HLTH-SERV	GHANA-HLTH-SERV	Government	Government	0	0	0	0	0	1	0	0	0	1	0	0	0	0	0	0	0	0	0	0	0	0	0	0	Article
43980381	The worldwide incidence of preterm birth: a systematic review of maternal mortality and morbidity	BULLETIN OF THE WORLD HEALTH ORGANIZATION	9	6	Gold OA article (non-APC)	Gold OA	1	Beck-S	Beck	Stacy	Author	2	UNIV-MICHIGAN	UNIV-MICHIGAN	UNIV-MICHIGAN	University	University - Rank 001-025	0	0	0	0	1	0	0	0	0	0	0	0	0	0	1	0	0	0	0	0	0	1	1	0	Article
43997183	Public Awareness and Knowledge of Herpes Zoster: Results of a Global Survey	GERONTOLOGY	2	3	Toll access article	Toll access	1	Paek-E	Paek	Esther	Author, Reprint Author	1	MERCK-&-CO-INC	MERCK-&-CO-INC	MERCK-&-CO-INC	Company	Company	1	0	0	0	0	0	0	1	1	0	0	0	0	0	0	0	0	0	0	0	0	0	0	0	Article
44021958	PROSPECTS FOR A GENUINE REVIVAL OF PRIMARY HEALTH CARE-THROUGH THE VISIBLE HAND OF SOCIAL JUSTICE RATHER THAN THE INVISIBLE HAND OF THE MARKET: PART II	INTERNATIONAL JOURNAL OF HEALTH SERVICES	1	1	Toll access article	Toll access	1	Katz-AR	Katz	Alison Rosamund	Author, Reprint Author	1	WORLD-HLTH-ORG	WHO	WHO	Non-profit	Non-profit	1	0	0	0	0	0	0	1	0	0	0	1	0	0	0	0	0	0	0	0	0	0	0	0	Article
44024834	Key Concepts for Estimating the Burden of Surgical Conditions and the Unmet Need for Surgical Care	WORLD JOURNAL OF SURGERY	9	9	Green OA article	Green OA	1	Bickler-S	Bickler	Stephen	Author, Reprint Author	1	UNIV-CALIF-SAN-DIEGO	UNIV-CALIF-SAN-DIEGO	UNIV-CALIF-SAN-DIEGO	University	University - Rank 026-050	0	0	0	0	0	1	0	0	0	0	0	0	0	0	0	1	0	0	0	0	0	1	1	0	Article
44024835	Developing Priorities for Addressing Surgical Conditions Globally: Furthering the Link Between Surgery and Public Health Policy	WORLD JOURNAL OF SURGERY	7	7	Green OA article	Green OA	1	Mock-C	Mock	Charles	Author, Reprint Author	1	WHO	WHO	WHO	Non-profit	Non-profit	0	0	0	0	0	1	0	0	0	0	0	1	0	0	0	0	0	0	0	0	0	0	0	0	Article
44044593	Apheresis Technologies and Clinical Applications: The 2007 International Apheresis Registry	THERAPEUTIC APHERESIS AND DIALYSIS	5	2	Green OA article	Green OA	1	Malchesky-PS	Malchesky	Paul S.	Author, Reprint Author	1	INT-CTR-ARTIFICIAL-ORGANS-&-TRANSPLANTAT	INT-CTR-ARTIFICIAL-ORGANS-&-TRANSPLANTAT	INT-CTR-ARTIFICIAL-ORGANS-&-TRANSPLANTAT	Company	Company	0	0	0	0	0	1	0	0	1	0	0	0	0	0	0	0	0	0	0	0	0	0	0	0	Article
44064667	Patient safety research: an overview of the global evidence	QUALITY & SAFETY IN HEALTH CARE	4	4	Toll access article	Toll access	1	Jha-AK	Jha	A. K.	Author, Reprint Author	1	HARVARD-UNIV	HARVARD-UNIV	HARVARD-UNIV	University	University - Rank 001-025	0	0	0	0	0	0	0	1	0	0	0	0	0	0	1	0	0	0	0	0	0	1	1	0	Article
44099896	The Changing Disease-Scape in the Third Epidemiological Transition	INTERNATIONAL JOURNAL OF ENVIRONMENTAL RESEARCH AND PUBLIC HEALTH	2	2	Gold OA article (APC)	Gold OA	1	Harper-K	Harper	Kristin	Author, Reprint Author	1	COLUMBIA-UNIV	COLUMBIA-UNIV	COLUMBIA-UNIV	University	University - Rank 001-025	0	1650.72	0	1	0	0	0	0	0	0	0	0	0	0	1	0	0	0	0	0	0	1	1	1	Review
44114913	Global estimates of the prevalence of diabetes for 2010 and 2030	DIABETES RESEARCH AND CLINICAL PRACTICE	3	1	Toll access article	Toll access	1	Shaw-JE	Shaw	J. E.	Author, Reprint Author	1	BAKER-IDI-HEART-&-DIABET-INST	BAKER-IDI-HEART-&-DIABET-INST	BAKER-IDI-HEART-&-DIABET-INST	Research institute	Research Institute	0	0	0	0	0	0	0	1	0	0	0	0	1	0	0	0	0	0	0	0	0	0	0	0	Article
44114914	Mortality attributable to diabetes: Estimates for the year 2010	DIABETES RESEARCH AND CLINICAL PRACTICE	2	2	Toll access article	Toll access	1	Roglic-G	Roglic	Gojka	Author, Reprint Author	1	WHO	WHO	WHO	Non-profit	Non-profit	0	0	0	0	0	0	0	1	0	0	0	1	0	0	0	0	0	0	0	0	0	0	0	0	Article
44123923	Globalisation and women's health in Sub-Saharan Africa: Would paying attention to women's occupational roles improve nutritional outcomes?	SCANDINAVIAN JOURNAL OF PUBLIC HEALTH	3	3	Toll access article	Toll access	1	Loewenson-R	Loewenson	Rene	Author, Reprint Author	1	UNIV-TEXAS-MED-BRANCH-TEXAS	UNIV-TEXAS-MED-BRANCH (UNIV-HOSP)	UNIV-TEXAS-MED-BRANCH (UNIV-HOSP)	Hospital	Hospital	0	0	0	0	0	0	0	1	0	0	1	0	0	0	0	0	0	0	0	0	0	0	0	0	Review
44123924	Can the Millennium Development Goals database be used to measure the effects of globalisation on women's health in Sub-Saharan Africa? A critical analysis	SCANDINAVIAN JOURNAL OF PUBLIC HEALTH	4	4	Green OA article	Green OA	1	Wamala-S	Wamala	Sarah	Author, Reprint Author	1	SWEDISH-NATL-INST-PUBL-HLTH	SWEDISH-NATL-INST-PUBL-HLTH	SWEDISH-NATL-INST-PUBL-HLTH	Government	Government	0	0	0	0	0	1	0	0	0	1	0	0	0	0	0	0	0	0	0	0	0	0	0	0	Article
44154904	Mental and neurological health research priorities setting in developing countries	SOCIAL PSYCHIATRY AND PSYCHIATRIC EPIDEMIOLOGY	21	21	Green OA article	Green OA	1	Khandelwal-S	Khandelwal	Sudhir	Author	1	ALL-INDIA-INST-MED-SCI	ALL-INDIA-INST-MED-SCI	ALL-INDIA-INST-MED-SCI	University	University: Unranked	0	0	0	0	0	1	0	0	0	0	0	0	0	0	0	0	0	0	0	0	1	1	0	0	Article
44160315	The problems in determining international road mortality	ACCIDENT ANALYSIS AND PREVENTION	3	1	Toll access article	Toll access	1	Sauerzapf-V	Sauerzapf	V.	Author, Reprint Author	1	UNIV-E-ANGLIA	UNIV-E-ANGLIA	UNIV-E-ANGLIA	University	University - Rank 101-200	0	0	0	0	0	0	0	1	0	0	0	0	0	0	0	0	0	1	0	0	0	1	0	0	Article
44191225	Global dermatopathology: Hansen's disease - current concepts and challenges	JOURNAL OF CUTANEOUS PATHOLOGY	3	4	Toll access article	Toll access	1	Piris-A	Piris	Adriano	Author, Reprint Author	1	MASSACHUSETTS-GEN-HOSP	MASSACHUSETTS-GEN-HOSP	MASSACHUSETTS-GEN-HOSP	Hospital	Hospital	0	0	0	0	0	0	0	1	0	0	1	0	0	0	0	0	0	0	0	0	0	0	0	0	Article
44201999	Improving and Assuring Newborn Screening Laboratory Quality Worldwide: 30-Year Experience at the Centers for Disease Control and Prevention	SEMINARS IN PERINATOLOGY	4	1	Toll access article	Toll access	1	DeJesus-VR	De Jesus	Victor R.	Author, Reprint Author	1	CTR-DIS-CONTROL-&-PREVENT	CDC	CDC	Government	Government	0	0	0	0	0	0	0	1	0	1	0	0	0	0	0	0	0	0	0	0	0	0	0	0	Review
44203150	Global Chronic Disease Research Training for Fellows Perspectives, Challenges, and Opportunities	CIRCULATION	2	2	Green OA article	Green OA	1	Bloomfield-GS	Bloomfield	Gerald S.	Author	1	DUKE-UNIV	DUKE-UNIV	DUKE-UNIV	University	University - Rank 001-025	0	0	0	0	0	1	0	0	0	0	0	0	0	0	1	0	0	0	0	0	0	1	1	0	Article
44220547	Reducing Population Salt Intake Worldwide: From Evidence to Implementation	PROGRESS IN CARDIOVASCULAR DISEASES	2	1	Green OA article	Green OA	1	He-FJ	He	Feng J.	Author, Reprint Author	1	QUEEN-MARY-UNIV-LONDON	QUEEN-MARY-UNIV-LONDON	QUEEN-MARY-UNIV-LONDON	University	University - Rank 101-200	0	0	0	0	0	1	0	0	0	0	0	0	0	0	0	0	0	1	0	0	0	1	0	0	Review
44233764	Primary, secondary and tertiary effects of eco-climatic change: the medical response	POSTGRADUATE MEDICAL JOURNAL	2	1	Green OA article	Green OA	1	Butler-CD	Butler	Colin D.	Author, Reprint Author	1	AUSTRALIAN-NATL-UNIV	AUSTRALIAN-NATL-UNIV	AUSTRALIAN-NATL-UNIV	University	University - Rank 026-050	0	0	0	0	0	1	0	0	0	0	0	0	0	0	0	1	0	0	0	0	0	1	1	0	Review
44233807	PNEUMOCOCCAL CONJUGATE VACCINES IN THE PREVENTION OF CHILDHOOD PNEUMONIA PREVENTION OF CHILDHOOD PNEUMONIA	ACTA MICROBIOLOGICA ET IMMUNOLOGICA HUNGARICA	1	2	Green OA article	Green OA	1	Ivady-B	Ivady	B.	Author, Reprint Author	1	SZENT-ISTVAN-HOSP	SZENT-ISTVAN-HOSP	SZENT-ISTVAN-HOSP	Hospital	Hospital	1	0	0	0	0	1	0	0	0	0	1	0	0	0	0	0	0	0	0	0	0	0	0	0	Article
44248166	An international compendium of mutations in the SCN5A-encoded cardiac sodium channel in patients referred for Brugada syndrome genetic testing	HEART RHYTHM	29	26	Green OA article	Green OA	1	Kapplinger-JD	Kapplinger	Jamie D.	Author	1	MAYO-CLIN	MAYO-CLIN	MAYO-CLIN	Hospital	Hospital	0	0	0	0	0	1	0	0	0	0	1	0	0	0	0	0	0	0	0	0	0	0	0	0	Article
44249590	Hepatocellular Carcinoma (HCC) A Global Perspective	JOURNAL OF CLINICAL GASTROENTEROLOGY	23	23	Green OA article	Green OA	1	Ferenci-P	Ferenci	Peter	Author, Reprint Author	1	MED-UNIV-VIENNA	MED-UNIV-VIENNA	MED-UNIV-VIENNA	University	University: Unranked	0	0	0	0	0	1	0	0	0	0	0	0	0	0	0	0	0	0	0	0	1	1	0	0	Article
44255700	Is early diagnosis of oral cancer a feasible objective? Who is to blame for diagnostic delay?	ORAL DISEASES	7	4	Toll access article	Toll access	1	Gomez-I	Gomez	I.	Author	3	UNIV-SANTIAGO-DE-COMPOSTELA	UNIV-SANTIAGO-DE-COMPOSTELA	UNIV-SANTIAGO-DE-COMPOSTELA	University	University - Rank 501+	0	0	0	0	0	0	0	1	0	0	0	0	0	0	0	0	0	0	0	1	0	1	0	0	Review
44265999	Drivers of Inequality in Millennium Development Goal Progress: A Statistical Analysis	PLOS MEDICINE	3	5	Gold OA article (APC)	Gold OA	1	Stuckler-D	Stuckler	David	Author, Reprint Author	1	UNIV-OXFORD	UNIV-OXFORD	UNIV-OXFORD	University	University - Rank 001-025	0	2900	0	1	0	0	0	0	0	0	0	0	0	0	1	0	0	0	0	0	0	1	1	1	Article
44280721	Perspectives on the Global Threat: The Challenge of Avian Influenza Viruses for the World's Veterinary Community	AVIAN DISEASES	2	2	Toll access article	Toll access	1	Capua-I	Capua	Ilaria	Author, Reprint Author	1	IST-ZOOPROFILATT-SPERIMENTALE-VENEZIE	IST-ZOOPROFILATT-SPERIMENTALE-VENEZIE	IST-ZOOPROFILATT-SPERIMENTALE-VENEZIE	Research institute	Research Institute	0	0	0	0	0	0	0	1	0	0	0	0	1	0	0	0	0	0	0	0	0	0	0	0	Article
44280756	Main Achievements of the World Organisation for Animal Health/United Nations Food and Agriculture Organization Network on Animal Influenza	AVIAN DISEASES	6	5	Toll access article	Toll access	1	Dauphin-G	Dauphin	Gwenaelle	Author, Reprint Author	1	FOOD-&-AGR-ORG-UNITED-NATIONS	FOOD-&-AGR-ORG-UNITED-NATIONS	FOOD-&-AGR-ORG-UNITED-NATIONS	Non-profit	Non-profit	0	0	0	0	0	0	0	1	0	0	0	1	0	0	0	0	0	0	0	0	0	0	0	0	Article
44280924	Global health and social responsibility: a pilot project of the Medical University of Vienna in eastern Ethiopia	WIENER KLINISCHE WOCHENSCHRIFT	5	4	Green OA article	Green OA	1	Lagler-H	Lagler	Heimo	Author	1	MED-UNIV-VIENNA	MED-UNIV-VIENNA	MED-UNIV-VIENNA	University	University: Unranked	0	0	0	0	0	1	0	0	0	0	0	0	0	0	0	0	0	0	0	0	1	1	0	0	Article
44292644	A Summary of the Literature on Global Hearing Impairment: Current Status and Priorities for Action	OTOLOGY & NEUROTOLOGY	3	3	Toll access article	Toll access	1	Tucci-DL	Tucci	Debara L.	Author, Reprint Author	1	DUKE-UNIV	DUKE-UNIV	DUKE-UNIV	University	University - Rank 001-025	0	0	0	0	0	0	0	1	0	0	0	0	0	0	1	0	0	0	0	0	0	1	1	0	Review
44293137	ESTABLISHING A SUSTAINABLE PARTNERSHIP THROUGH SHORT-TERM GLOBAL FIELD EXPERIENCES: THE UNIVERSITY OF FLORIDA AND CANTON EL LIMON COLLABORATION	PUBLIC HEALTH REPORTS	5	1	Green OA article	Green OA	1	AmayaBurns-A	Amaya-Burns	Alba	Author, Reprint Author	1	UNIV-FLORIDA	UNIV-FLORIDA	UNIV-FLORIDA	University	University - Rank 101-200	1	0	0	0	0	1	0	0	0	0	0	0	0	0	0	0	0	1	0	0	0	1	0	0	Article
44293138	PRACTICE-BASED LEARNING IN GLOBAL YOUTH TOBACCO PREVENTION RESEARCH AT THE UNIVERSITY OF TEXAS MASTER OF PUBLIC HEALTH PROGRAM	PUBLIC HEALTH REPORTS	6	3	Green OA article	Green OA	1	Dhavan-P	Dhavan	Poonam	Author, Reprint Author	1	UNIV-TEXAS-HOUSTON	UNIV-TEXAS-HLTH-SCI-CTR (UNIV-HOSP)	UNIV-TEXAS-HLTH-SCI-CTR (UNIV-HOSP)	Hospital	Hospital	0	0	0	0	0	1	0	0	0	0	1	0	0	0	0	0	0	0	0	0	0	0	0	0	Article
44296488	The worldwide societal costs of dementia: Estimates for 2009	ALZHEIMERS & DEMENTIA	3	2	Green OA article	Green OA	1	Wimo-A	Wimo	Anders	Author, Reprint Author	1	KAROLINSKA-INST	KAROLINSKA-INST	KAROLINSKA-INST	University	University - Rank 026-050	0	0	0	0	0	1	0	0	0	0	0	0	0	0	0	1	0	0	0	0	0	1	1	0	Article
44304892	Clinical Management of Pandemic 2009 Influenza A(H1N1) Infection	CHEST	3	3	Green OA article	Green OA	1	Hui-DS	Hui	David S.	Author, Reprint Author	1	CHINESE-UNIV-HONG-KONG	CHINESE-UNIV-HONG-KONG	CHINESE-UNIV-HONG-KONG	University	University - Rank 051-100	0	0	0	0	0	1	0	0	0	0	0	0	0	0	0	0	1	0	0	0	0	1	0	0	Article
44311382	Measuring the global burden of low back pain	BEST PRACTICE & RESEARCH IN CLINICAL RHEUMATOLOGY	7	7	Toll access article	Toll access	1	Hoy-D	Hoy	Damian	Author, Reprint Author	1	UNIV-QUEENSLAND	UNIV-QUEENSLAND	UNIV-QUEENSLAND	University	University - Rank 051-100	0	0	0	0	0	0	0	1	0	0	0	0	0	0	0	0	1	0	0	0	0	1	0	0	Article
44321248	Global disparities in the epilepsy treatment gap: a systematic review	BULLETIN OF THE WORLD HEALTH ORGANIZATION	5	4	Gold OA article (non-APC)	Gold OA	1	Meyer-AC	Meyer	Ana-Claire	Author, Reprint Author	1	UNIV-CALIF-SAN-FRANCISCO	UCSF	UCSF	University	University - Rank 001-025	0	0	0	0	1	0	0	0	0	0	0	0	0	0	1	0	0	0	0	0	0	1	1	0	Review
44350076	Community-acquired pneumonia in HIV-infected children: a global perspective	CURRENT OPINION IN PULMONARY MEDICINE	2	1	Toll access article	Toll access	1	Gray-DM	Gray	D. M.	Author, Reprint Author	1	UNIV-CAPE-TOWN	UNIV-CAPE-TOWN	UNIV-CAPE-TOWN	University	University - Rank 101-200	0	0	0	0	0	0	0	1	0	0	0	0	0	0	0	0	0	1	0	0	0	1	0	0	Article
44350084	New and improved tuberculosis diagnostics: evidence, policy, practice, and impact	CURRENT OPINION IN PULMONARY MEDICINE	4	3	Green OA article	Green OA	1	Pai-M	Pai	Madhukar	Author, Reprint Author	1	MCGILL-UNIV	MCGILL-UNIV	MCGILL-UNIV	University	University - Rank 026-050	0	0	0	0	0	1	0	0	0	0	0	0	0	0	0	1	0	0	0	0	0	1	1	0	Article
44355369	Colorectal Cancer: National and International Perspective on the Burden of Disease and Public Health Impact	GASTROENTEROLOGY	2	2	Toll access article	Toll access	1	Gellad-ZF	Gellad	Ziad F.	Author, Reprint Author	1	DUKE-UNIV	DUKE-UNIV	DUKE-UNIV	University	University - Rank 001-025	1	0	0	0	0	0	0	1	0	0	0	0	0	0	1	0	0	0	0	0	0	1	1	0	Article
44384093	Global impact of rotavirus vaccines	EXPERT REVIEW OF VACCINES	13	6	Green OA article	Green OA	1	Tate-JE	Tate	Jacqueline E.	Author, Reprint Author	1	US-CDC	CDC	CDC	Government	Government	0	0	0	0	0	1	0	0	0	1	0	0	0	0	0	0	0	0	0	0	0	0	0	0	Review
44390639	How Common Is the Most Common Adult Movement Disorder? Update on the Worldwide Prevalence of Essential Tremor	MOVEMENT DISORDERS	2	5	Toll access article	Toll access	1	Louis-ED	Louis	Elan D.	Author, Reprint Author	1	COLUMBIA-UNIV	COLUMBIA-UNIV	COLUMBIA-UNIV	University	University - Rank 001-025	0	0	0	0	0	0	0	1	0	0	0	0	0	0	1	0	0	0	0	0	0	1	1	0	Review
44391484	METHODS FOR THE STUDY OF EMPLOYMENT RELATIONS AND HEALTH INEQUALITIES IN A GLOBAL CONTEXT	INTERNATIONAL JOURNAL OF HEALTH SERVICES	9	14	Toll access article	Toll access	1	Benach-J	Benach	Joan	Author, Reprint Author	1	UNIV-POMPEU-FABRA	POMPEU-FABRA-UNIV	POMPEU-FABRA-UNIV	University	University - Rank 101-200	0	0	0	0	0	0	0	1	0	0	0	0	0	0	0	0	0	1	0	0	0	1	0	0	Article
44391487	EMPLOYMENT RELATIONS AND GLOBAL HEALTH: A TYPOLOGICAL STUDY OF WORLD LABOR MARKETS	INTERNATIONAL JOURNAL OF HEALTH SERVICES	3	9	Toll access article	Toll access	1	Chung-H	Chung	Haejoo	Author, Reprint Author	1	KOREA-UNIV	KOREA-UNIV	KOREA-UNIV	University	University - Rank 201-500	0	0	0	0	0	0	0	1	0	0	0	0	0	0	0	0	0	0	1	0	0	1	0	0	Article
44411559	The challenge of uncorrected refractive error: driving the agenda of the Durban Declaration on refractive error and service development	CLINICAL AND EXPERIMENTAL OPTOMETRY	6	1	Green OA article	Green OA	1	Naidoo-KS	Naidoo	Kovin S.	Author	1	INT-CTR-EYECARE-EDUC	INT-CTR-EYECARE-EDUC	INT-CTR-EYECARE-EDUC	Non-profit	Non-profit	0	0	0	0	0	1	0	0	0	0	0	1	0	0	0	0	0	0	0	0	0	0	0	0	Review
44421930	Technologic developments in telemedicine: State-of-the-art academic interactions	SURGERY	6	6	Toll access article	Toll access	1	Shimizu-S	Shimizu	Shuji	Author, Reprint Author	2	KYUSHU-UNIV-HOSP	KYUSHU-UNIV	KYUSHU-UNIV-HOSP	Hospital	Hospital	0	0	0	0	0	0	0	1	0	0	1	0	0	0	0	0	0	0	0	0	0	0	0	0	Article
44431359	Polio Eradication Is Just Over the Horizon: The Challenges of Global Resource Mobilization	JOURNAL OF HEALTH COMMUNICATION	2	2	Toll access article	Toll access	1	Pirio-GA	Pirio	Gregory Alonso	Author, Reprint Author	1	EMPOWERING-COMMUN	EMPOWERING-COMMUN	EMPOWERING-COMMUN	Non-profit	Non-profit	0	0	0	0	0	0	0	1	0	0	0	1	0	0	0	0	0	0	0	0	0	0	0	0	Article
44439898	Cross-National Analysis of the Associations between Traumatic Events and Suicidal Behavior: Findings from the WHO World Mental Health Surveys	PLOS ONE	26	24	Gold OA article (APC)	Gold OA	1	Stein-DJ	Stein	Dan J.	Author, Reprint Author	1	GROOTE-SCHUUR-HOSP	GROOTE-SCHUUR-HOSP	GROOTE-SCHUUR-HOSP	Hospital	Hospital	0	1495	0	1	0	0	0	0	0	0	1	0	0	0	0	0	0	0	0	0	0	0	0	1	Article
44460989	Global Government Health Partners' Forum 2006: eighteen months later	INTERNATIONAL NURSING REVIEW	5	2	Toll access article	Toll access	1	Foster-J	Foster	J.	Author, Reprint Author	1	EMORY-UNIV	EMORY-UNIV	EMORY-UNIV	University	University - Rank 051-100	0	0	0	0	0	0	0	1	0	0	0	0	0	0	0	0	1	0	0	0	0	1	0	0	Article
44464862	Climate change and the global malaria recession	NATURE	6	6	Green OA article	Green OA	1	Gething-PW	Gething	Peter W.	Author	1	UNIV-OXFORD	UNIV-OXFORD	UNIV-OXFORD	University	University - Rank 001-025	0	0	0	0	0	1	0	0	0	0	0	0	0	0	1	0	0	0	0	0	0	1	1	0	Article
44472599	Worldwide mortality in men and women aged 15-59 years from 1970 to 2010: a systematic analysis	LANCET	9	3	Toll access article	Toll access	1	Rajaratnam-JK	Rajaratnam	Julie Knoll	Author	1	UNIV-WASHINGTON	UNIV-WASHINGTON	UNIV-WASHINGTON	University	University - Rank 026-050	0	0	0	0	0	0	0	1	0	0	0	0	0	0	0	1	0	0	0	0	0	1	1	0	Article
44480208	Surveillance of Chronic Kidney Disease Around the World: Tracking and Reining in a Global Problem	ADVANCES IN CHRONIC KIDNEY DISEASE	5	3	Toll access article	Toll access	1	Saran-R	Saran	Rajiv	Author, Reprint Author	1	UNIV-MICHIGAN	UNIV-MICHIGAN	UNIV-MICHIGAN	University	University - Rank 001-025	0	0	0	0	0	0	0	1	0	0	0	0	0	0	1	0	0	0	0	0	0	1	1	0	Article
44480388	Growing Epidemic of Coronary Heart Disease in Low- and Middle-Income Countries	CURRENT PROBLEMS IN CARDIOLOGY	5	6	Green OA article	Green OA	1	Gaziano-TA	Gaziano	Thomas A.	Author, Reprint Author	1	HARVARD-UNIV	HARVARD-UNIV	HARVARD-UNIV	University	University - Rank 001-025	0	0	0	0	0	1	0	0	0	0	0	0	0	0	1	0	0	0	0	0	0	1	1	0	Review
44534615	Global prevalence of chronic migraine: A systematic review	CEPHALALGIA	7	5	Green OA article	Green OA	1	Natoli-JL	Natoli	J. L.	Author, Reprint Author	1	CERNER-LIFESCI-BEVERLY-HILLS	CERNER-LIFESCI-BEVERLY-HILLS	CERNER-LIFESCI-BEVERLY-HILLS	Company	Company	0	0	0	0	0	1	0	0	1	0	0	0	0	0	0	0	0	0	0	0	0	0	0	0	Review
44543921	Airports, localities and disease: Representations of global travel during the H1N1 pandemic	HEALTH & PLACE	3	2	Toll access article	Toll access	1	Warren-A	Warren	Adam	Author, Reprint Author	1	UNIV-LOUGHBOROUGH	UNIV-LOUGHBOROUGH	UNIV-LOUGHBOROUGH	University	University - Rank 201-500	0	0	0	0	0	0	0	1	0	0	0	0	0	0	0	0	0	0	1	0	0	1	0	0	Article
44546352	Compulsory service programmes for recruiting health workers in remote and rural areas: do they work?	BULLETIN OF THE WORLD HEALTH ORGANIZATION	4	1	Gold OA article (non-APC)	Gold OA	1	Frehywot-S	Frehywot	Seble	Author, Reprint Author	1	GEORGE-WASHINGTON-UNIV	GEORGE-WASHINGTON-UNIV	GEORGE-WASHINGTON-UNIV	University	University - Rank 201-500	0	0	0	0	1	0	0	0	0	0	0	0	0	0	0	0	0	0	1	0	0	1	0	0	Article
44583226	Sharing health data: good intentions are not enough	BULLETIN OF THE WORLD HEALTH ORGANIZATION	2	2	Gold OA article (non-APC)	Gold OA	1	Pisani-E	Pisani	Elizabeth	Author, Reprint Author	1	UNIV-LONDON-LONDON-SCH-HYG-&-TROP-MED	UNIV-LONDON-LONDON-SCH-HYG-&-TROP-MED	UNIV-LONDON-LONDON-SCH-HYG-&-TROP-MED	University	University - Rank 001-025	0	0	0	0	1	0	0	0	0	0	0	0	0	0	1	0	0	0	0	0	0	1	1	0	Article
44585558	Overview and Determinants of Cardiovascular Disease in Indigenous Populations	HEART LUNG AND CIRCULATION	9	8	Green OA article	Green OA	1	Kritharides-L	Kritharides	Leonard	Author, Reprint Author	1	UNIV-SYDNEY	UNIV-SYDNEY	UNIV-SYDNEY	University	University - Rank 051-100	0	0	0	0	0	1	0	0	0	0	0	0	0	0	0	0	1	0	0	0	0	1	0	0	Article
44587443	Evolving public health approaches to the global challenge of foodborne infections	INTERNATIONAL JOURNAL OF FOOD MICROBIOLOGY	5	3	Toll access article	Toll access	1	Tauxe-RV	Tauxe	R. V.	Author, Reprint Author	1	CTR-DIS-CONTROL-&-PREVENT	CDC	CDC	Government	Government	0	0	0	0	0	0	0	1	0	1	0	0	0	0	0	0	0	0	0	0	0	0	0	0	Article
44608738	Nanosilver and global public health: international regulatory issues	NANOMEDICINE	2	2	Toll access article	Toll access	1	Faunce-T	Faunce	Thomas	Author	1	AUSTRALIAN-NATL-UNIV	AUSTRALIAN-NATL-UNIV	AUSTRALIAN-NATL-UNIV	University	University - Rank 026-050	0	0	0	0	0	0	0	1	0	0	0	0	0	0	0	1	0	0	0	0	0	1	1	0	Review
44625227	Chagas disease: a new worldwide challenge	NATURE	2	3	Green OA article	Green OA	1	Coura-JR	Coura	Jose Rodrigues	Author, Reprint Author	1	UNIV-FED-RIO-DE-JANEIRO	UNIV-FED-RIO-DE-JANEIRO	UNIV-FED-RIO-DE-JANEIRO	University	University - Rank 501+	0	0	0	0	0	1	0	0	0	0	0	0	0	0	0	0	0	0	0	1	0	1	0	0	Article
44625835	Increasing world incidence of thyroid cancer: Increased detection or higher radiation exposure?	HORMONES-INTERNATIONAL JOURNAL OF ENDOCRINOLOGY AND METABOLISM	1	3	Gold OA article (non-APC)	Gold OA	1	Wartofsky-L	Wartofsky	Leonard	Author, Reprint Author	1	WASHINGTON-HOSP-CTR	GEORGE-WASHINGTON-UNIV	WASHINGTON-HOSP-CTR	Hospital	Hospital	1	0	0	0	1	0	0	0	0	0	1	0	0	0	0	0	0	0	0	0	0	0	0	0	Review
44632241	The global burden of diabetes and its complications: an emerging pandemic	EUROPEAN JOURNAL OF CARDIOVASCULAR PREVENTION & REHABILITATION	5	3	Toll access article	Toll access	1	vanDieren-S	van Dieren	Susan	Author	1	UNIV-MED-CTR-UTRECHT	UNIV-UTRECHT	UNIV-MED-CTR	Hospital	Hospital	0	0	0	0	0	0	0	1	0	0	1	0	0	0	0	0	0	0	0	0	0	0	0	0	Review
44646523	Percolation of influenza AH1N1 epidemic in the world: Usefulness of the spatial-connectivity models	REVISTA MEDICA DE CHILE	2	2	Gold OA article (APC)	Gold OA	1	Canals-M	Canals L	Mauricio	Author, Reprint Author	1	UNIV-CHILE	UNIV-CHILE	UNIV-CHILE	University	University - Rank 501+	0	100	0	1	0	0	0	0	0	0	0	0	0	0	0	0	0	0	0	1	0	1	0	1	Article
44648484	Population dynamics and climate change: what are the links?	JOURNAL OF PUBLIC HEALTH	3	3	Hybrid article	Hybrid	1	Stephenson-J	Stephenson	Judith	Author, Reprint Author	1	UCL	UCL	UCL	University	University - Rank 001-025	0	2400	0	0	0	0	1	0	0	0	0	0	0	0	1	0	0	0	0	0	0	1	1	1	Article
44649478	Tuberculosis 7 Health-system strengthening and tuberculosis control	LANCET	4	5	Toll access article	Toll access	1	Atun-R	Atun	Rifat	Author, Reprint Author	1	GLOBAL-FUND-FIGHT-AIDS-TB-&-MALARIA	GLOBAL-FUND-FIGHT-AIDS-TB-&-MALARIA	GLOBAL-FUND-FIGHT-AIDS-TB-&-MALARIA	Non-profit	Non-profit	0	0	0	0	0	0	0	1	0	0	0	1	0	0	0	0	0	0	0	0	0	0	0	0	Article
44649479	Tuberculosis 8 Scale-up of services and research priorities for diagnosis, management, and control of tuberculosis: a call to action	LANCET	15	19	Toll access article	Toll access	1	Marais-BJ	Marais	Ben J.	Author, Reprint Author	1	UNIV-STELLENBOSCH	UNIV-STELLENBOSCH	UNIV-STELLENBOSCH	University	University - Rank 201-500	0	0	0	0	0	0	0	1	0	0	0	0	0	0	0	0	0	0	1	0	0	1	0	0	Article
44650818	Controlling Alcohol-Related Global Health Problems	ASIA-PACIFIC JOURNAL OF PUBLIC HEALTH	2	1	Toll access article	Toll access	1	Lam-TH	Lam	Tai Hing	Author, Reprint Author	1	UNIV-HONG-KONG	UNIV-HONG-KONG	UNIV-HONG-KONG	University	University - Rank 026-050	0	0	0	0	0	0	0	1	0	0	0	0	0	0	0	1	0	0	0	0	0	1	1	0	Article
44650824	Backsliding Against Malnutrition	ASIA-PACIFIC JOURNAL OF PUBLIC HEALTH	3	1	Green OA article	Green OA	1	Harrison-GG	Harrison	Gail G.	Author, Reprint Author	1	UNIV-CALIF-LOS-ANGELES	UCLA	UCLA	University	University - Rank 001-025	1	0	0	0	0	1	0	0	0	0	0	0	0	0	1	0	0	0	0	0	0	1	1	0	Article
44658750	The Economic Benefits Resulting from the First 8 Years of the Global Programme to Eliminate Lymphatic Filariasis (2000-2007)	PLOS NEGLECTED TROPICAL DISEASES	5	3	Gold OA article (APC)	Gold OA	1	Chu-BK	Chu	Brian K.	Author, Reprint Author	1	TASK-FORCE-GLOBAL-HLTH	TASK-FORCE-GLOBAL-HLTH	TASK-FORCE-GLOBAL-HLTH	Non-profit	Non-profit	0	2250	0	1	0	0	0	0	0	0	0	1	0	0	0	0	0	0	0	0	0	0	0	1	Article
44658760	The Global Burden of Alveolar Echinococcosis	PLOS NEGLECTED TROPICAL DISEASES	4	1	Gold OA article (APC)	Gold OA	1	Torgerson-PR	Torgerson	Paul R.	Author	1	UNIV-ZURICH	UNIV-ZURICH	UNIV-ZURICH	University	University - Rank 101-200	1	2250	0	1	0	0	0	0	0	0	0	0	0	0	0	0	0	1	0	0	0	1	0	1	Article
44665139	Estimating the Global Clinical Burden of Plasmodium falciparum Malaria in 2007	PLOS MEDICINE	7	5	Gold OA article (APC)	Gold OA	1	Hay-SI	Hay	Simon I.	Author, Reprint Author	1	UNIV-OXFORD	UNIV-OXFORD	UNIV-OXFORD	University	University - Rank 001-025	0	2900	0	1	0	0	0	0	0	0	0	0	0	0	1	0	0	0	0	0	0	1	1	1	Article
44670422	The Case for a Global Ban on Asbestos	ENVIRONMENTAL HEALTH PERSPECTIVES	16	15	Gold OA article (non-APC)	Gold OA	1	Ladou-J	Ladou	Joseph	Author, Reprint Author	1	UNIV-CALIF-SAN-FRANCISCO	UCSF	UCSF	University	University - Rank 001-025	0	0	0	0	1	0	0	0	0	0	0	0	0	0	1	0	0	0	0	0	0	1	1	0	Article
44680182	Goals and activities proposed by countries in seven regions of the world toward prevention of unsafe abortion	INTERNATIONAL JOURNAL OF GYNECOLOGY & OBSTETRICS	4	4	Toll access article	Toll access	1	Mirembe-F	Mirembe	Florence	Author	2	MAKERERE-UNIV	MAKERERE-UNIV	MAKERERE-UNIV	University	University - Rank 201-500	0	0	0	0	0	0	0	1	0	0	0	0	0	0	0	0	0	0	1	0	0	1	0	0	Article
44683533	Unrecorded consumption, quality of alcohol and health consequences	DRUG AND ALCOHOL REVIEW	3	4	Toll access article	Toll access	1	Rehm-J	Rehm	Juergen	Author, Reprint Author	1	CTR-ADDICT-&-MENTAL-HLTH	CTR-ADDICT-&-MENTAL-HLTH	CTR-ADDICT-&-MENTAL-HLTH	Research institute	Research Institute	0	0	0	0	0	0	0	1	0	0	0	0	1	0	0	0	0	0	0	0	0	0	0	0	Review
44689566	International Perspective on Early-Onset Neonatal Sepsis	CLINICS IN PERINATOLOGY	3	2	Toll access article	Toll access	1	Ganatra-HA	Ganatra	Hammad A.	Author	1	AGA-KHAN-UNIV	AGA-KHAN-UNIV	AGA-KHAN-UNIV	University	University: Unranked	0	0	0	0	0	0	0	1	0	0	0	0	0	0	0	0	0	0	0	0	1	1	0	0	Article
44700946	Towards innovation and a partnership future for mental health nursing	CONTEMPORARY NURSE	2	2	Green OA article	Green OA	1	Procter-N	Procter	Nicholas	Author, Reprint Author	1	UNIV-S-AUSTRALIA	UNIV-S-AUSTRALIA	UNIV-S-AUSTRALIA	University	University - Rank 201-500	0	0	0	0	0	1	0	0	0	0	0	0	0	0	0	0	0	0	1	0	0	1	0	0	Article
44721766	Iodine status and availability of iodized salt: An across-country analysis	FOOD AND NUTRITION BULLETIN	2	2	Green OA article	Green OA	1	Horton-S	Horton	Sue	Author, Reprint Author	1	UNIV-WATERLOO	UNIV-WATERLOO	UNIV-WATERLOO	University	University - Rank 101-200	0	0	0	0	0	1	0	0	0	0	0	0	0	0	0	0	0	1	0	0	0	1	0	0	Article
44732965	Global Surgery: Thoughts on an Emerging Surgical Subspecialty for Students and Residents	JOURNAL OF SURGICAL EDUCATION	4	5	Toll access article	Toll access	1	Leow-JJ	Leow	Jeffrey J.	Author, Reprint Author	1	MONASH-UNIV	MONASH-UNIV	MONASH-UNIV	University	University - Rank 051-100	0	0	0	0	0	0	0	1	0	0	0	0	0	0	0	0	1	0	0	0	0	1	0	0	Article
44735150	The Framingham Heart Study: Impact on the Prevention and Control of Cardiovascular Diseases in India	PROGRESS IN CARDIOVASCULAR DISEASES	2	1	Toll access article	Toll access	1	Reddy-KS	Reddy	Kolli Srinath	Author, Reprint Author	1	PUBL-HLTH-FDN-INDIA	PUBL-HLTH-FDN-INDIA	PUBL-HLTH-FDN-INDIA	Non-profit	Non-profit	0	0	0	0	0	0	0	1	0	0	0	1	0	0	0	0	0	0	0	0	0	0	0	0	Review
44735151	The Abu Dhabi Cardiovascular Program: The Continuation of Framingham	PROGRESS IN CARDIOVASCULAR DISEASES	2	1	Toll access article	Toll access	1	Hajat-C	Hajat	Cother	Author, Reprint Author	1	HLTH-AUTHOR-ABU-DHABI	HLTH-AUTHOR-ABU-DHABI	HLTH-AUTHOR-ABU-DHABI	Government	Government	0	0	0	0	0	0	0	1	0	1	0	0	0	0	0	0	0	0	0	0	0	0	0	0	Review
44735157	The Framingham Heart Study's Impact on Global Risk Assessment	PROGRESS IN CARDIOVASCULAR DISEASES	2	4	Green OA article	Green OA	1	Bitton-A	Bitton	Asaf	Author	2	BRIGHAM-&-WOMENS-HOSP	BRIGHAM-&-WOMENS-HOSP	BRIGHAM-&-WOMENS-HOSP	Hospital	Hospital	0	0	0	0	0	1	0	0	0	0	1	0	0	0	0	0	0	0	0	0	0	0	0	0	Review
44739188	The World Federation of Societies of Biological Psychiatry (WFSBP) Guidelines for the biological treatment of paraphilias	WORLD JOURNAL OF BIOLOGICAL PSYCHIATRY	5	8	Toll access article	Toll access	1	Thibaut-F	Thibaut	Florence	Author, Reprint Author	1	UNIV-ROUEN	UNIV-ROUEN	UNIV-ROUEN	University	University: Unranked	0	0	0	0	0	0	0	1	0	0	0	0	0	0	0	0	0	0	0	0	1	1	0	0	Article
44739779	Estimating the global distribution and disease burden of intestinal nematode infections: Adding up the numbers - A review	INTERNATIONAL JOURNAL FOR PARASITOLOGY	1	2	Green OA article	Green OA	1	Brooker-S	Brooker	Simon	Author, Reprint Author	1	KENYA-GOVT-MED-RES-CTR	KENYA-GOVT-MED-RES-CTR	KENYA-GOVT-MED-RES-CTR	Research institute	Research Institute	1	0	0	0	0	1	0	0	0	0	0	0	1	0	0	0	0	0	0	0	0	0	0	0	Review
44748596	Overweight and obesity in children and adolescents. The worldwide situation	BUNDESGESUNDHEITSBLATT-GESUNDHEITSFORSCHUNG-GESUNDHEITSSCHUTZ	4	1	Toll access article	Toll access	1	Pigeot-I	Pigeot	I.	Author, Reprint Author	1	UNIV-BREMEN	UNIV-BREMEN	UNIV-BREMEN	University	University - Rank 201-500	0	0	0	0	0	0	0	1	0	0	0	0	0	0	0	0	0	0	1	0	0	1	0	0	Article
44768382	Determinants of oral cancer at the national level: just a question of smoking and alcohol drinking prevalence?	ODONTOLOGY	2	2	Toll access article	Toll access	1	Petti-S	Petti	Stefano	Author, Reprint Author	1	UNIV-ROMA-LA-SAPIENZA	UNIV-ROMA-LA-SAPIENZA	UNIV-ROMA-LA-SAPIENZA	University	University - Rank 201-500	0	0	0	0	0	0	0	1	0	0	0	0	0	0	0	0	0	0	1	0	0	1	0	0	Article
44774312	Epidemiologic Approaches to Global Health	EPIDEMIOLOGIC REVIEWS	2	3	Green OA article	Green OA	1	Quinn-TC	Quinn	Thomas C.	Author, Reprint Author	1	JOHNS-HOPKINS-UNIV	JOHNS-HOPKINS-UNIV	JOHNS-HOPKINS-UNIV	University	University - Rank 001-025	0	0	0	0	0	1	0	0	0	0	0	0	0	0	1	0	0	0	0	0	0	1	1	0	Article
44774318	Global Health and Foreign Policy	EPIDEMIOLOGIC REVIEWS	3	2	Green OA article	Green OA	1	Feldbaum-H	Feldbaum	Harley	Author, Reprint Author	1	JOHNS-HOPKINS-UNIV	JOHNS-HOPKINS-UNIV	JOHNS-HOPKINS-UNIV	University	University - Rank 001-025	0	0	0	0	0	1	0	0	0	0	0	0	0	0	1	0	0	0	0	0	0	1	1	0	Article
44774319	Trends and Directions of Global Public Health Surveillance	EPIDEMIOLOGIC REVIEWS	1	2	Green OA article	Green OA	1	CastilloSalgado-C	Castillo-Salgado	Carlos	Author, Reprint Author	1	JOHNS-HOPKINS-UNIV	JOHNS-HOPKINS-UNIV	JOHNS-HOPKINS-UNIV	University	University - Rank 001-025	1	0	0	0	0	1	0	0	0	0	0	0	0	0	1	0	0	0	0	0	0	1	1	0	Article
44774320	The Global Burden of Unintentional Injuries and an Agenda for Progress	EPIDEMIOLOGIC REVIEWS	3	2	Green OA article	Green OA	1	Chandran-A	Chandran	Aruna	Author	1	JOHNS-HOPKINS-BLOOMBERG-SCH-PUBL-HLTH	JOHNS-HOPKINS-UNIV	JOHNS-HOPKINS-UNIV	University	University - Rank 001-025	0	0	0	0	0	1	0	0	0	0	0	0	0	0	1	0	0	0	0	0	0	1	1	0	Article
44797165	Stroke: Working toward a Prioritized World Agenda	CEREBROVASCULAR DISEASES	53	52	Green OA article	Green OA	1	Hachinski-V	Hachinski	Vladimir	Author, Reprint Author	1	UNIV-WESTERN-ONTARIO	UNIV-WESTERN-ONTARIO	UNIV-WESTERN-ONTARIO	University	University - Rank 201-500	0	0	0	0	0	1	0	0	0	0	0	0	0	0	0	0	0	0	1	0	0	1	0	0	Article
44797375	Global Evolutionary Trend of the Prevalence of Primary Glomerulonephritis over the Past Three Decades	NEPHRON CLINICAL PRACTICE	17	4	Green OA article	Green OA	1	Woo-KT	Woo	Keng-Thye	Author, Reprint Author	1	SINGAPORE-GEN-HOSP	SINGAPORE-GEN-HOSP	SINGAPORE-GEN-HOSP	Hospital	Hospital	0	0	0	0	0	1	0	0	0	0	1	0	0	0	0	0	0	0	0	0	0	0	0	0	Article
44824087	Hepatocellular carcinoma: a global view	NATURE REVIEWS GASTROENTEROLOGY & HEPATOLOGY	2	1	Green OA article	Green OA	1	Yang-JD	Yang	Ju Dong	Author	1	MAYO-CLIN	MAYO-CLIN	MAYO-CLIN	Hospital	Hospital	0	0	0	0	0	1	0	0	0	0	1	0	0	0	0	0	0	0	0	0	0	0	0	0	Review
44829192	Global Patterns of Cancer Incidence and Mortality Rates and Trends	CANCER EPIDEMIOLOGY BIOMARKERS & PREVENTION	4	1	Delayed OA article	Delayed OA	1	Jemal-A	Jemal	Ahmedin	Author, Reprint Author	1	AMER-CANC-SOC	AMER-CANC-SOC	AMER-CANC-SOC	Scientific association	Scientific association	0	0	1	0	0	0	0	0	0	0	0	0	0	1	0	0	0	0	0	0	0	0	0	0	Review
44833672	Placing Emergency Care on the Global Agenda	ANNALS OF EMERGENCY MEDICINE	4	4	Toll access article	Toll access	1	Hsia-R	Hsia	Renee	Author, Reprint Author	1	UNIV-CALIF-SAN-FRANCISCO	UCSF	UCSF	University	University - Rank 001-025	0	0	0	0	0	0	0	1	0	0	0	0	0	0	1	0	0	0	0	0	0	1	1	0	Article
44834263	Prevalence of headache in Europe: a review for the Eurolight project	JOURNAL OF HEADACHE AND PAIN	2	4	Gold OA article (APC)	Gold OA	1	Stovner-LJ	Stovner	Lars Jacob	Author, Reprint Author	1	NORWEGIAN-UNIV-SCI-&-TECHNOL	NORWEGIAN-UNIV-SCI-&-TECHNOL	NORWEGIAN-UNIV-SCI-&-TECHNOL	University	University - Rank 201-500	0	1965	0	1	0	0	0	0	0	0	0	0	0	0	0	0	0	0	1	0	0	1	0	1	Review
44834280	The Political Economy of Emergency and Essential Surgery in Global Health	WORLD JOURNAL OF SURGERY	3	4	Green OA article	Green OA	1	Hedges-JP	Hedges	Jeremy P.	Author, Reprint Author	1	TENWEK-HOSP	TENWEK-HOSP	TENWEK-HOSP	Hospital	Hospital	0	0	0	0	0	1	0	0	0	0	1	0	0	0	0	0	0	0	0	0	0	0	0	0	Article
44850139	Global Inequality in Eye Health: Country-Level Analysis From the Global Burden of Disease Study	AMERICAN JOURNAL OF PUBLIC HEALTH	3	2	Green OA article	Green OA	1	Ono-K	Ono	Koichi	Author, Reprint Author	1	JUNTENDO-UNIV	JUNTENDO-UNIV	JUNTENDO-UNIV	University	University - Rank 501+	0	0	0	0	0	1	0	0	0	0	0	0	0	0	0	0	0	0	0	1	0	1	0	0	Article
44854145	Associations of serious mental illness with earnings: results from the WHO World Mental Health surveys	BRITISH JOURNAL OF PSYCHIATRY	24	22	Green OA article	Green OA	1	Levinson-D	Levinson	Daphna	Author	2	MINIST-HLTH	MINIST-HLTH-ISRAEL	MINIST-HLTH-ISRAEL	Government	Government	0	0	0	0	0	1	0	0	0	1	0	0	0	0	0	0	0	0	0	0	0	0	0	0	Article
44866362	Global perspective of legal abortion - Trends analysis and accessibility	BEST PRACTICE & RESEARCH IN CLINICAL OBSTETRICS & GYNAECOLOGY	2	1	Toll access article	Toll access	1	Myers-JE	Myers	Jenny E.	Author, Reprint Author	1	UNIV-MANCHESTER	UNIV-MANCHESTER	UNIV-MANCHESTER	University	University - Rank 051-100	0	0	0	0	0	0	0	1	0	0	0	0	0	0	0	0	1	0	0	0	0	1	0	0	Article
44873254	Global reduction of cervical cancer with human papillomavirus vaccines: insights from the hepatitis B virus vaccine experience	SEXUAL HEALTH	3	5	Toll access article	Toll access	1	Heffernan-ME	Heffernan	Margaret E.	Author, Reprint Author	1	ROYAL-WOMENS-HOSP	ROYAL-WOMENS-HOSP	ROYAL-WOMENS-HOSP	Hospital	Hospital	0	0	0	0	0	0	0	1	0	0	1	0	0	0	0	0	0	0	0	0	0	0	0	0	Article
44875355	Laboratory Systems and Services Are Critical in Global Health Time to End the Neglect?	AMERICAN JOURNAL OF CLINICAL PATHOLOGY	9	7	Green OA article	Green OA	1	Nkengasong-JN	Nkengasong	John N.	Author, Reprint Author	1	US-CTR-DIS-CONTROL-&-PREVENT	CDC	CDC	Government	Government	0	0	0	0	0	1	0	0	0	1	0	0	0	0	0	0	0	0	0	0	0	0	0	0	Article
44876047	Beyond the income inequality hypothesis and human health: a worldwide exploration	REVISTA DE SAUDE PUBLICA	3	3	Gold OA article (APC)	Gold OA	1	Idrovo-AJ	Idrovo	Alvaro J.	Author, Reprint Author	1	INST-NACL-SALUD-PUBL	INST-NACL-SALUD-PUBL	INST-NACL-SALUD-PUBL	Research institute	Research Institute	0	697.5	0	1	0	0	0	0	0	0	0	0	1	0	0	0	0	0	0	0	0	0	0	1	Article
44904198	Diarrhoea morbidity and mortality in older children, adolescents, and adults	EPIDEMIOLOGY AND INFECTION	2	1	Toll access article	Toll access	1	Walker-CLF	Walker	C. L. Fischer	Author, Reprint Author	1	JOHNS-HOPKINS-BLOOMBERG-SCH-PUBL-HLTH	JOHNS-HOPKINS-UNIV	JOHNS-HOPKINS-UNIV	University	University - Rank 001-025	0	0	0	0	0	0	0	1	0	0	0	0	0	0	1	0	0	0	0	0	0	1	1	0	Review
44904266	Factors influencing performance of Global Fund-supported tuberculosis grants	INTERNATIONAL JOURNAL OF TUBERCULOSIS AND LUNG DISEASE	6	3	Green OA article	Green OA	1	Katz-I	Katz	I.	Author, Reprint Author	1	GLOBAL-FUND-FIGHT-AIDS-TB-&-MALARIA	GLOBAL-FUND-FIGHT-AIDS-TB-&-MALARIA	GLOBAL-FUND-FIGHT-AIDS-TB-&-MALARIA	Non-profit	Non-profit	0	0	0	0	0	1	0	0	0	0	0	1	0	0	0	0	0	0	0	0	0	0	0	0	Article
44905783	Implications of Food Insecurity on Global Health Policy and Nursing Practice	JOURNAL OF NURSING SCHOLARSHIP	2	1	Toll access article	Toll access	1	KreggByers-CM	Kregg-Byers	Claudia M.	Author, Reprint Author	1	UNIV-PITTSBURGH	UNIV-PITTSBURGH	UNIV-PITTSBURGH	University	University - Rank 051-100	0	0	0	0	0	0	0	1	0	0	0	0	0	0	0	0	1	0	0	0	0	1	0	0	Article
44941078	Millennium Development Goals and Global Women's and Infants' Health	JOGNN-JOURNAL OF OBSTETRIC GYNECOLOGIC AND NEONATAL NURSING	1	1	Toll access article	Toll access	1	Mattson-S	Mattson	Susan	Author, Reprint Author	1	ARIZONA-STATE-UNIV	ARIZONA-STATE-UNIV	ARIZONA-STATE-UNIV	University	University - Rank 101-200	1	0	0	0	0	0	0	1	0	0	0	0	0	0	0	0	0	1	0	0	0	1	0	0	Article
44941079	Addressing Poverty, Education, and Gender Equality to Improve the Health of Women Worldwide	JOGNN-JOURNAL OF OBSTETRIC GYNECOLOGIC AND NEONATAL NURSING	2	4	Toll access article	Toll access	1	TyerViola-LA	Tyer-Viola	Lynda A.	Author, Reprint Author	1	MASSACHUSETTS-GEN-HOSP	MASSACHUSETTS-GEN-HOSP	MASSACHUSETTS-GEN-HOSP	Hospital	Hospital	0	0	0	0	0	0	0	1	0	0	1	0	0	0	0	0	0	0	0	0	0	0	0	0	Article
44941080	Achieving Millennium Development Goal 5, the Improvement of Maternal Health	JOGNN-JOURNAL OF OBSTETRIC GYNECOLOGIC AND NEONATAL NURSING	2	2	Toll access article	Toll access	1	Callister-LC	Callister	Lynn Clark	Author, Reprint Author	1	BRIGHAM-YOUNG-UNIV	BRIGHAM-YOUNG-UNIV	BRIGHAM-YOUNG-UNIV	University	University: Unranked	0	0	0	0	0	0	0	1	0	0	0	0	0	0	0	0	0	0	0	0	1	1	0	0	Article
44941081	Sustaining the Vision for Millennium Development Goal 6, to Halt and Reverse the Spread of HIV/AIDS and Other Infections	JOGNN-JOURNAL OF OBSTETRIC GYNECOLOGIC AND NEONATAL NURSING	2	2	Toll access article	Toll access	1	Campbell-D	Campbell	Della (Dee)	Author, Reprint Author	1	FELICIAN-COLL	FELICIAN-COLL	FELICIAN-COLL	University	University: Unranked	0	0	0	0	0	0	0	1	0	0	0	0	0	0	0	0	0	0	0	0	1	1	0	0	Article
44966399	Global health or global wealth?	NATURE BIOTECHNOLOGY	2	2	Toll access article	Toll access	1	Rezaie-R	Rezaie	Rahim	Author, Reprint Author	1	UNIV-HLTH-NETWORK	UNIV-HLTH-NETWORK	UNIV-HLTH-NETWORK	Research institute	Research Institute	0	0	0	0	0	0	0	1	0	0	0	0	1	0	0	0	0	0	0	0	0	0	0	0	Article
44992006	Feeding the world healthily: the challenge of measuring the effects of agriculture on health	PHILOSOPHICAL TRANSACTIONS OF THE ROYAL SOCIETY B-BIOLOGICAL SCIENCES	8	5	Green OA article	Green OA	1	Hawkesworth-S	Hawkesworth	Sophie	Author	1	UNIV-LONDON-LONDON-SCH-HYG-&-TROP-MED	UNIV-LONDON-LONDON-SCH-HYG-&-TROP-MED	UNIV-LONDON-LONDON-SCH-HYG-&-TROP-MED	University	University - Rank 001-025	0	0	0	0	0	1	0	0	0	0	0	0	0	0	1	0	0	0	0	0	0	1	1	0	Review
44998019	Where in the world is interprofessional education? A global environmental scan	JOURNAL OF INTERPROFESSIONAL CARE	2	4	Green OA article	Green OA	1	Rodger-S	Rodger	Sylvia	Author, Reprint Author	1	UNIV-QUEENSLAND	UNIV-QUEENSLAND	UNIV-QUEENSLAND	University	University - Rank 051-100	0	0	0	0	0	1	0	0	0	0	0	0	0	0	0	0	1	0	0	0	0	1	0	0	Article
45016130	Making sense of the global economy: 10 resources for health promoters	HEALTH PROMOTION INTERNATIONAL	2	1	Hybrid article	Hybrid	1	Mohindra-KS	Mohindra	K. S.	Author, Reprint Author	1	UNIV-OTTAWA	UNIV-OTTAWA	UNIV-OTTAWA	University	University - Rank 201-500	0	3000	0	0	0	0	1	0	0	0	0	0	0	0	0	0	0	0	1	0	0	1	0	1	Article
45028075	What Should We Do to Raise Awareness on the Issue of Cancer in the Global Health Agenda?	JAPANESE JOURNAL OF CLINICAL ONCOLOGY	6	7	Hybrid article	Hybrid	1	Kawahara-N	Kawahara	Norie	Author, Reprint Author	1	UNIV-TOKYO	UNIV-TOKYO	UNIV-TOKYO	University	University - Rank 026-050	0	2800	0	0	0	0	1	0	0	0	0	0	0	0	0	1	0	0	0	0	0	1	1	1	Article
45038322	Increased educational attainment and its effect on child mortality in 175 countries between 1970 and 2009: a systematic analysis	LANCET	4	1	Toll access article	Toll access	1	Gakidou-E	Gakidou	Emmanuela	Author, Reprint Author	1	UNIV-WASHINGTON	UNIV-WASHINGTON	UNIV-WASHINGTON	University	University - Rank 026-050	0	0	0	0	0	0	0	1	0	0	0	0	0	0	0	1	0	0	0	0	0	1	1	0	Article
45041083	WASH-World Action on Salt and Health	KIDNEY INTERNATIONAL	3	1	Toll access article	Toll access	1	He-FJ	He	Feng J.	Author, Reprint Author	1	QUEEN-MARY-UNIV-LONDON	QUEEN-MARY-UNIV-LONDON	QUEEN-MARY-UNIV-LONDON	University	University - Rank 101-200	0	0	0	0	0	0	0	1	0	0	0	0	0	0	0	0	0	1	0	0	0	1	0	0	Review
45048843	International Crises and Global Health Electives: Lessons for Faculty and Institutions	ACADEMIC MEDICINE	5	3	Hybrid article	Hybrid	1	Steiner-BD	Steiner	Beat D.	Author, Reprint Author	1	UNIV-N-CAROLINA	UNIV-N-CAROLINA	UNIV-N-CAROLINA	University	University - Rank 051-100	0	3900	0	0	0	0	1	0	0	0	0	0	0	0	0	0	1	0	0	0	0	1	0	1	Article
45050856	Innovative Solutions to Closing the Health Gap Between Rich and Poor: A Special Symposium on Global Health Governance	JOURNAL OF LAW MEDICINE & ETHICS	2	4	Toll access article	Toll access	1	Gostin-LO	Gostin	Lawrence O.	Author	1	JOHNS-HOPKINS-UNIV	JOHNS-HOPKINS-UNIV	JOHNS-HOPKINS-UNIV	University	University - Rank 001-025	0	0	0	0	0	0	0	1	0	0	0	0	0	0	1	0	0	0	0	0	0	1	1	0	Article
45050857	Seven Challenges in International Development Assistance for Health and Ways Forward	JOURNAL OF LAW MEDICINE & ETHICS	1	2	Green OA article	Green OA	1	Sridhar-D	Sridhar	Devi	Author, Reprint Author	1	UNIV-OXFORD-ALL-SOULS-COLL	UNIV-OXFORD	UNIV-OXFORD	University	University - Rank 001-025	1	0	0	0	0	1	0	0	0	0	0	0	0	0	1	0	0	0	0	0	0	1	1	0	Article
45050858	Global Health Governance: Commission on Social Determinants of Health and the Imperative for Change	JOURNAL OF LAW MEDICINE & ETHICS	3	2	Toll access article	Toll access	1	Bell-R	Bell	Ruth	Author, Reprint Author	1	UCL	UCL	UCL	University	University - Rank 001-025	0	0	0	0	0	0	0	1	0	0	0	0	0	0	1	0	0	0	0	0	0	1	1	0	Article
45050863	Addressing Global Health Governance Challenges through a New Mechanism: The Proposal for a Committee C of the World Health Assembly	JOURNAL OF LAW MEDICINE & ETHICS	3	3	Toll access article	Toll access	1	Kickbusch-I	Kickbusch	Ilona	Author, Reprint Author	1	GRAD-INST-INT-&-DEV-STUDIES	GRAD-INST-INT-&-DEV-STUDIES	GRAD-INST-INT-&-DEV-STUDIES	Research institute	Research Institute	0	0	0	0	0	0	0	1	0	0	0	0	1	0	0	0	0	0	0	0	0	0	0	0	Article
45050864	Lessons from the Experience of U.N. Convention on the Rights of Persons with Disabilities: Addressing the Democratic Deficit in Global Health Governance	JOURNAL OF LAW MEDICINE & ETHICS	3	3	Toll access article	Toll access	1	Lord-JE	Lord	Janet E.	Author	1	HARVARD-UNIV	HARVARD-UNIV	HARVARD-UNIV	University	University - Rank 001-025	0	0	0	0	0	0	0	1	0	0	0	0	0	0	1	0	0	0	0	0	0	1	1	0	Article
45050865	A Framework Convention on Global Health: Social Justice Lite, or a Light on Social Justice?	JOURNAL OF LAW MEDICINE & ETHICS	2	1	Toll access article	Toll access	1	Burris-S	Burris	Scott	Author, Reprint Author	1	TEMPLE-UNIV	TEMPLE-UNIV	TEMPLE-UNIV	University	University - Rank 201-500	1	0	0	0	0	0	0	1	0	0	0	0	0	0	0	0	0	0	1	0	0	1	0	0	Article
45050866	Why the West Is Perceived as Being Unworthy of Cooperation	JOURNAL OF LAW MEDICINE & ETHICS	1	2	Toll access article	Toll access	1	Ooms-G	Ooms	Gorik	Author, Reprint Author	1	INST-TROP-MED	INST-TROP-MED	INST-TROP-MED	Research institute	Research Institute	1	0	0	0	0	0	0	1	0	0	0	0	1	0	0	0	0	0	0	0	0	0	0	0	Article
45070439	A new approach to global health institutions? A case study of new vaccine introduction and the formation of the GAVI Alliance	SOCIAL SCIENCE & MEDICINE	3	2	Toll access article	Toll access	1	Sandberg-KI	Sandberg	Kristin Ingstad	Author, Reprint Author	1	UNIV-OSLO	UNIV-OSLO	UNIV-OSLO	University	University - Rank 101-200	0	0	0	0	0	0	0	1	0	0	0	0	0	0	0	0	0	1	0	0	0	1	0	0	Article
45089705	Perceptions of tobacco health warnings in China compared with picture and text-only health warnings from other countries: an experimental study	TOBACCO CONTROL	7	3	Green OA article	Green OA	1	Fong-GT	Fong	Geoffrey T.	Author, Reprint Author	1	UNIV-WATERLOO	UNIV-WATERLOO	UNIV-WATERLOO	University	University - Rank 101-200	0	0	0	0	0	1	0	0	0	0	0	0	0	0	0	0	0	1	0	0	0	1	0	0	Article
45123545	Advancing health equity in the global marketplace: How human rights can help	SOCIAL SCIENCE & MEDICINE	4	3	Green OA article	Green OA	1	Schrecker-T	Schrecker	Ted	Author, Reprint Author	1	UNIV-OTTAWA	UNIV-OTTAWA	UNIV-OTTAWA	University	University - Rank 201-500	0	0	0	0	0	1	0	0	0	0	0	0	0	0	0	0	0	0	1	0	0	1	0	0	Article
45156808	The dimensions of the CRC problem	BEST PRACTICE & RESEARCH IN CLINICAL GASTROENTEROLOGY	5	3	Toll access article	Toll access	1	Karsa-LV	Karsa	L. V.	Author, Reprint Author	1	IARC	INT-AGCY-RES-CANC	INT-AGCY-RES-CANC	Research institute	Research Institute	0	0	0	0	0	0	0	1	0	0	0	0	1	0	0	0	0	0	0	0	0	0	0	0	Article
45165565	Is the eradication of tuberculosis 'yesterday's ambition' or 'tomorrow's triumph'?	CLINICAL MEDICINE	2	1	Toll access article	Toll access	1	Zumla-A	Zumla	Alimuddin	Author	1	UCL	UCL	UCL	University	University - Rank 001-025	0	0	0	0	0	0	0	1	0	0	0	0	0	0	1	0	0	0	0	0	0	1	1	0	Article
45171580	Critical Care 1 Critical care and the global burden of critical illness in adults	LANCET	4	3	Toll access article	Toll access	1	Adhikari-NKJ	Adhikari	Neill K. J.	Author	1	SUNNYBROOK-HLTH-SCI-CTR	SUNNYBROOK-HLTH-SCI-CTR	SUNNYBROOK-HLTH-SCI-CTR	Hospital	Hospital	0	0	0	0	0	0	0	1	0	0	1	0	0	0	0	0	0	0	0	0	0	0	0	0	Article
45189612	Prioritised research agenda for prevention and control of chronic respiratory diseases	EUROPEAN RESPIRATORY JOURNAL	24	24	Green OA article	Green OA	1	Bousquet-J	Bousquet	J.	Author, Reprint Author	1	HOP-ARNAUD-DE-VILLENEUVE	HOP-ARNAUD-DE-VILLENEUVE	HOP-ARNAUD-DE-VILLENEUVE	Hospital	Hospital	0	0	0	0	0	1	0	0	0	0	1	0	0	0	0	0	0	0	0	0	0	0	0	0	Article
45191826	Expanded partnerships between medical faculty and medical students: Developing a Global Health curriculum as an example of 'student-led learning' at the University of Queensland, Australia	MEDICAL TEACHER	2	1	Toll access article	Toll access	1	Merridew-N	Merridew	Nancy	Author, Reprint Author	1	UNIV-QUEENSLAND	UNIV-QUEENSLAND	UNIV-QUEENSLAND	University	University - Rank 051-100	1	0	0	0	0	0	0	1	0	0	0	0	0	0	0	0	1	0	0	0	0	1	0	0	Article
45202478	Global Health: A Successful Context for Precollege Training and Advocacy	PLOS ONE	3	2	Gold OA article (APC)	Gold OA	1	Gervassi-AL	Gervassi	Ana L.	Author, Reprint Author	1	SEATTLE-BIOMED-RES-INST	CENT INF DIS RES SEATTLE	CENT INF DIS RES SEATTLE	Research institute	Research Institute	0	1495	0	1	0	0	0	0	0	0	0	0	1	0	0	0	0	0	0	0	0	0	0	1	Article
45210612	Global Women's Health in 2010: Facing the Challenges	JOURNAL OF WOMENS HEALTH	3	3	Toll access article	Toll access	1	Lester-F	Lester	Felicia	Author, Reprint Author	1	BRIGHAM-&-WOMENS-HOSP	BRIGHAM-&-WOMENS-HOSP	BRIGHAM-&-WOMENS-HOSP	Hospital	Hospital	0	0	0	0	0	0	0	1	0	0	1	0	0	0	0	0	0	0	0	0	0	0	0	0	Article
45210614	Navigating the Challenges of Global Reproductive Health Research	JOURNAL OF WOMENS HEALTH	4	3	Green OA article	Green OA	1	Stenson-AL	Stenson	Amy L.	Author, Reprint Author	1	UNIV-CALIF-LOS-ANGELES	UCLA	UCLA	University	University - Rank 001-025	0	0	0	0	0	1	0	0	0	0	0	0	0	0	1	0	0	0	0	0	0	1	1	0	Article
45210619	The Role of Health Professional Associations in the Promotion of Global Women's Health	JOURNAL OF WOMENS HEALTH	3	2	Toll access article	Toll access	1	Lalonde-AB	Lalonde	Andre B.	Author, Reprint Author	1	SOC-OBSTETRICIANS-&-GYNAECOLOGISTS	SOC-OBSTETRICIANS-&-GYNAECOLOGISTS	SOC-OBSTETRICIANS-&-GYNAECOLOGISTS	Scientific association	Scientific association	0	0	0	0	0	0	0	1	0	0	0	0	0	1	0	0	0	0	0	0	0	0	0	0	Article
45223571	Global prevalence and trends of overweight and obesity among preschool children	AMERICAN JOURNAL OF CLINICAL NUTRITION	3	1	Hybrid article	Hybrid	1	deOnis-M	de Onis	Mercedes	Author, Reprint Author	1	WHO	WHO	WHO	Non-profit	Non-profit	0	5000	0	0	0	0	1	0	0	0	0	1	0	0	0	0	0	0	0	0	0	0	0	1	Article
45240636	A framework for identifying similarities among countries to improve cross-national comparisons of health systems	HEALTH & PLACE	2	2	Toll access article	Toll access	1	Bauer-DT	Bauer	David T.	Author, Reprint Author	1	UNIV-VIRGINIA	UNIV-VIRGINIA	UNIV-VIRGINIA	University	University - Rank 101-200	0	0	0	0	0	0	0	1	0	0	0	0	0	0	0	0	0	1	0	0	0	1	0	0	Article
45250294	Estimates of worldwide burden of cancer in 2008: GLOBOCAN 2008	INTERNATIONAL JOURNAL OF CANCER	6	4	Hybrid article	Hybrid	1	Ferlay-J	Ferlay	Jacques	Author, Reprint Author	1	INT-AGCY-RES-CANC	INT-AGCY-RES-CANC	INT-AGCY-RES-CANC	Research institute	Research Institute	0	3000	0	0	0	0	1	0	0	0	0	0	1	0	0	0	0	0	0	0	0	0	0	1	Article
45250295	Fifty years of cancer incidence: CI5 I-IX	INTERNATIONAL JOURNAL OF CANCER	7	4	Hybrid article	Hybrid	1	Parkin-DM	Parkin	D. Max	Author, Reprint Author	1	UNIV-OXFORD	UNIV-OXFORD	UNIV-OXFORD	University	University - Rank 001-025	0	3000	0	0	0	0	1	0	0	0	0	0	0	0	1	0	0	0	0	0	0	1	1	1	Article
45253363	An international review of musculoskeletal disorders in the dental hygiene profession	INTERNATIONAL DENTAL JOURNAL	3	1	Green OA article	Green OA	1	Hayes-MJ	Hayes	Melanie J.	Author, Reprint Author	1	UNIV-NEWCASTLE	UNIV-NEWCASTLE	UNIV-NEWCASTLE	University	University - Rank 101-200	0	0	0	0	0	1	0	0	0	0	0	0	0	0	0	0	0	1	0	0	0	1	0	0	Review
45257873	Global eradication of poliomyelitis: Is the end of the campaign in sight?	JOURNAL OF PAEDIATRICS AND CHILD HEALTH	1	1	Toll access article	Toll access	1	Adams-T	Adams	Tony	Author, Reprint Author	1	WHO	WHO	WHO	Non-profit	Non-profit	1	0	0	0	0	0	0	1	0	0	0	1	0	0	0	0	0	0	0	0	0	0	0	0	Article
45267250	Supranational surveillance of antimicrobial resistance: The legacy of the last decade and proposals for the future	DRUG RESISTANCE UPDATES	2	2	Toll access article	Toll access	1	Giske-CG	Giske	Christian G.	Author, Reprint Author	1	KAROLINSKA-UNIV-HOSP	KAROLINSKA-INST	KAROLINSKA-UNIV-HOSP	Hospital	Hospital	0	0	0	0	0	0	0	1	0	0	1	0	0	0	0	0	0	0	0	0	0	0	0	0	Review
45275163	Chronic Diseases: Chronic Diseases and Development 1 Raising the priority of preventing chronic diseases: a political process	LANCET	11	12	Toll access article	Toll access	1	Geneau-R	Geneau	Robert	Author, Reprint Author	1	UNIV-OTTAWA	UNIV-OTTAWA	UNIV-OTTAWA	University	University - Rank 201-500	0	0	0	0	0	0	0	1	0	0	0	0	0	0	0	0	0	0	1	0	0	1	0	0	Article
45328846	Obesity in children & adolescents	INDIAN JOURNAL OF MEDICAL RESEARCH	2	1	Gold OA article (non-APC)	Gold OA	1	Raj-M	Raj	Manu	Author, Reprint Author	1	AMRITA-INST-MED-SCI-&-RES-CTR	AMRITA-INST-MED-SCI-&-RES-CTR	AMRITA-INST-MED-SCI-&-RES-CTR	University	University - Rank 501+	1	0	0	0	1	0	0	0	0	0	0	0	0	0	0	0	0	0	0	1	0	1	0	0	Review
45886475	Consensus Statement on Standard of Care for Congenital Muscular Dystrophies	JOURNAL OF CHILD NEUROLOGY	40	29	Green OA article	Green OA	1	Wang-CH	Wang	Ching H.	Author, Reprint Author	1	STANFORD-UNIV	STANFORD-UNIV	STANFORD-UNIV	University	University - Rank 001-025	0	0	0	0	0	1	0	0	0	0	0	0	0	0	1	0	0	0	0	0	0	1	1	0	Article
45891814	Unintended Pregnancy: Worldwide Levels, Trends, and Outcomes	STUDIES IN FAMILY PLANNING	3	1	Green OA article	Green OA	1	Singh-S	Singh	Susheela	Author, Reprint Author	1	GUTTMACHER-INST	GUTTMACHER-INST	GUTTMACHER-INST	Research institute	Research Institute	0	0	0	0	0	1	0	0	0	0	0	0	1	0	0	0	0	0	0	0	0	0	0	0	Article
45922505	Global capacity for emerging infectious disease detection	PROCEEDINGS OF THE NATIONAL ACADEMY OF SCIENCES OF THE UNITED STATES OF AMERICA	10	9	Green OA article	Green OA	1	Chan-EH	Chan	Emily H.	Author	1	CHILDRENS-HOSP	CHILDRENS-HOSP-BOSTON	CHILDRENS-HOSP-BOSTON	Hospital	Hospital	0	0	0	0	0	1	0	0	0	0	1	0	0	0	0	0	0	0	0	0	0	0	0	0	Article
45923817	Ethics and Best Practice Guidelines for Training Experiences in Global Health	AMERICAN JOURNAL OF TROPICAL MEDICINE AND HYGIENE	2	19	Green OA article	Green OA	1	Crump-JA	Crump	John A.	Author, Reprint Author	1	DUKE-UNIV	DUKE-UNIV	DUKE-UNIV	University	University - Rank 001-025	0	0	0	0	0	1	0	0	0	0	0	0	0	0	1	0	0	0	0	0	0	1	1	0	Article
45957729	Characteristics of insomnia in a primary care setting: EQUINOX survey of 5293 insomniacs from 10 countries	SLEEP MEDICINE	5	5	Toll access article	Toll access	1	Leger-D	Leger	Damien	Author, Reprint Author	1	UNIV-PARIS-05	PARIS-DESCARTES-UNIV	PARIS-DESCARTES-UNIV	University	University - Rank 201-500	0	0	0	0	0	0	0	1	0	0	0	0	0	0	0	0	0	0	1	0	0	1	0	0	Article
45957730	Daytime consequences of insomnia symptoms among outpatients in primary care practice: EQUINOX international survey	SLEEP MEDICINE	6	5	Toll access article	Toll access	1	Leger-D	Leger	Damien	Author, Reprint Author	1	UNIV-PARIS-05	PARIS-DESCARTES-UNIV	PARIS-DESCARTES-UNIV	University	University - Rank 201-500	0	0	0	0	0	0	0	1	0	0	0	0	0	0	0	0	0	0	1	0	0	1	0	0	Article
45962526	Global health competencies and approaches in medical education: a literature review	BMC MEDICAL EDUCATION	9	1	Gold OA article (APC)	Gold OA	1	Battat-R	Battat	Robert	Author	1	MCGILL-UNIV	MCGILL-UNIV	MCGILL-UNIV	University	University - Rank 026-050	0	2145	0	1	0	0	0	0	0	0	0	0	0	0	0	1	0	0	0	0	0	1	1	1	Review
45979914	Death in Seclusion - A Worldwide Phenomenon Illustrated on Fringe Groups in Munich	GESUNDHEITSWESEN	7	2	Toll access article	Toll access	1	Fieseler-S	Fieseler	S.	Author, Reprint Author	1	UNIV-MUNICH	UNIV-MUNICH	UNIV-MUNICH	University	University - Rank 026-050	0	0	0	0	0	0	0	1	0	0	0	0	0	0	0	1	0	0	0	0	0	1	1	0	Article
45996392	Worldwide H. pylori Antibiotic Resistance: a Systematic Review	JOURNAL OF GASTROINTESTINAL AND LIVER DISEASES	8	3	Gold OA article (non-APC)	Gold OA	1	DeFrancesco-V	De Francesco	Vincenzo	Author, Reprint Author	1	UNIV-FOGGIA	UNIV-FOGGIA	UNIV-FOGGIA	University	University: Unranked	0	0	0	0	1	0	0	0	0	0	0	0	0	0	0	0	0	0	0	0	1	1	0	0	Review
46005204	Animal production food safety: priority pathogens for standard setting by the World Organisation for Animal Health	REVUE SCIENTIFIQUE ET TECHNIQUE DE L OFFICE INTERNATIONAL DES EPIZOOTIES	3	2	Toll access article	Toll access	1	KnightJones-TJD	Knight-Jones	T. J. D.	Author, Reprint Author	1	ROYAL-VET-COLL	ROYAL-VET-COLL	ROYAL-VET-COLL	University	University - Rank 201-500	0	0	0	0	0	0	0	1	0	0	0	0	0	0	0	0	0	0	1	0	0	1	0	0	Article
46005209	Toward a global foot and mouth disease vaccine bank network	REVUE SCIENTIFIQUE ET TECHNIQUE DE L OFFICE INTERNATIONAL DES EPIZOOTIES	5	2	Toll access article	Toll access	1	Barnett-PV	Barnett	P. V.	Author, Reprint Author	1	AFRC	AFRC	AFRC	Research institute	Research Institute	0	0	0	0	0	0	0	1	0	0	0	0	1	0	0	0	0	0	0	0	0	0	0	0	Article
46015115	Global oral health of older people - Call for public health action	COMMUNITY DENTAL HEALTH	4	3	Green OA article	Green OA	1	Petersen-PE	Petersen	P. E.	Author, Reprint Author	1	WHO	WHO	WHO	Non-profit	Non-profit	0	0	0	0	0	1	0	0	0	0	0	1	0	0	0	0	0	0	0	0	0	0	0	0	Article
46025197	Anthropology, knowledge-flows and global health	GLOBAL PUBLIC HEALTH	5	6	Green OA article	Green OA	1	Feierman-S	Feierman	S.	Author, Reprint Author	1	UNIV-PENN	UNIV-PENN	UNIV-PENN	University	University - Rank 001-025	0	0	0	0	0	1	0	0	0	0	0	0	0	0	1	0	0	0	0	0	0	1	1	0	Article
46025198	'Sustainability' in global health	GLOBAL PUBLIC HEALTH	3	3	Toll access article	Toll access	1	Yang-A	Yang	Alice	Author	2	HARVARD-UNIV	HARVARD-UNIV	HARVARD-UNIV	University	University - Rank 001-025	0	0	0	0	0	0	0	1	0	0	0	0	0	0	1	0	0	0	0	0	0	1	1	0	Article
46025199	Economic valuations in global health	GLOBAL PUBLIC HEALTH	2	2	Toll access article	Toll access	1	McGahan-AM	McGahan	Anita M.	Author, Reprint Author	1	UNIV-TORONTO	UNIV-TORONTO	UNIV-TORONTO	University	University - Rank 001-025	0	0	0	0	0	0	0	1	0	0	0	0	0	0	1	0	0	0	0	0	0	1	1	0	Article
46025200	Values in global health governance	GLOBAL PUBLIC HEALTH	3	4	Toll access article	Toll access	1	Benatar-SR	Benatar	S. R.	Author, Reprint Author	1	UNIV-CAPE-TOWN	UNIV-CAPE-TOWN	UNIV-CAPE-TOWN	University	University - Rank 101-200	0	0	0	0	0	0	0	1	0	0	0	0	0	0	0	0	0	1	0	0	0	1	0	0	Article
46025201	Evolving values in ethics and global health research	GLOBAL PUBLIC HEALTH	4	8	Toll access article	Toll access	1	IJsselmuiden-CB	IJsselmuiden	C. B.	Author, Reprint Author	1	COUNCIL-HLTH-RES-DEV	COUNCIL-HLTH-RES-DEV	COUNCIL-HLTH-RES-DEV	Government	Government	0	0	0	0	0	0	0	1	0	1	0	0	0	0	0	0	0	0	0	0	0	0	0	0	Article
46031113	Early childhood adversity and later hypertension: Data from the World Mental Health Survey	ANNALS OF CLINICAL PSYCHIATRY	15	15	Green OA article	Green OA	1	Stein-DJ	Stein	Dan J.	Author, Reprint Author	1	UNIV-CAPE-TOWN	UNIV-CAPE-TOWN	UNIV-CAPE-TOWN	University	University - Rank 101-200	0	0	0	0	0	1	0	0	0	0	0	0	0	0	0	0	0	1	0	0	0	1	0	0	Article
46038531	Global health security and the International Health Regulations	BMC PUBLIC HEALTH	4	2	Gold OA article (APC)	Gold OA	1	Andrus-JK	Andrus	Jon Kim	Author, Reprint Author	1	PAN-AMER-HLTH-ORG	PAN-AMER-HLTH-ORG	PAN-AMER-HLTH-ORG	Non-profit	Non-profit	0	2145	0	1	0	0	0	0	0	0	0	1	0	0	0	0	0	0	0	0	0	0	0	1	Review
46038542	US Government engagement in support of global disease surveillance	BMC PUBLIC HEALTH	11	9	Gold OA article (APC)	Gold OA	1	Katz-RL	Katz	Rebecca L.	Author, Reprint Author	1	US-DEPT-STATE	US-DEPT-STATE	US-DEPT-STATE	Government	Government	0	2145	0	1	0	0	0	0	0	1	0	0	0	0	0	0	0	0	0	0	0	0	0	1	Review
46042541	Developing an understanding between people: The key to global health	TRAVEL MEDICINE AND INFECTIOUS DISEASE	1	1	Toll access article	Toll access	1	Serafin-A	Serafin	Alina	Author, Reprint Author	1	UCL	UCL	UCL	University	University - Rank 001-025	1	0	0	0	0	0	0	1	0	0	0	0	0	0	1	0	0	0	0	0	0	1	1	0	Article
46056955	Climate Change, Vector-borne Disease and Interdisciplinary Research: Social Science Perspectives on an Environment and Health Controversy	ECOHEALTH	2	2	Toll access article	Toll access	1	Brisbois-BW	Brisbois	Ben W.	Author, Reprint Author	1	UNIV-BRITISH-COLUMBIA	UNIV-BRITISH-COLUMBIA	UNIV-BRITISH-COLUMBIA	University	University - Rank 026-050	0	0	0	0	0	0	0	1	0	0	0	0	0	0	0	1	0	0	0	0	0	1	1	0	Article
46072857	The global burden of cataract	CURRENT OPINION IN OPHTHALMOLOGY	3	2	Toll access article	Toll access	1	Rao-GN	Rao	Gullapalli N.	Author	1	LV-PRASAD-EYE-INST	LV-PRASAD-EYE-INST	LV-PRASAD-EYE-INST	Non-profit	Non-profit	0	0	0	0	0	0	0	1	0	0	0	1	0	0	0	0	0	0	0	0	0	0	0	0	Article
46079826	International trade versus public health during the FCTC negotiations, 1999-2003	TOBACCO CONTROL	3	3	Green OA article	Green OA	1	Mamudu-HM	Mamudu	Hadii M.	Author, Reprint Author	1	E-TENNESSEE-STATE-UNIV	E-TENNESSEE-STATE-UNIV	E-TENNESSEE-STATE-UNIV	University	University: Unranked	0	0	0	0	0	1	0	0	0	0	0	0	0	0	0	0	0	0	0	0	1	1	0	0	Article
46081950	Systematic Review: Estimation of global burden of non-suppurative sequelae of upper respiratory tract infection: rheumatic fever and post-streptococcal glomerulonephritis	TROPICAL MEDICINE & INTERNATIONAL HEALTH	3	3	Hybrid article	Hybrid	1	Jackson-SJ	Jackson	Stewart J.	Author, Reprint Author	1	UNIV-EDINBURGH	UNIV-EDINBURGH	UNIV-EDINBURGH	University	University - Rank 026-050	0	3000	0	0	0	0	1	0	0	0	0	0	0	0	0	1	0	0	0	0	0	1	1	1	Review
46088775	Probiotics, Enteric and Diarrheal Diseases, and Global Health	GASTROENTEROLOGY	6	7	Green OA article	Green OA	1	Preidis-GA	Preidis	Geoffrey A.	Author	1	BAYLOR-COLL-MED	BAYLOR-COLL-MED	BAYLOR-COLL-MED	University	University: Unranked	0	0	0	0	0	1	0	0	0	0	0	0	0	0	0	0	0	0	0	0	1	1	0	0	Review
46093969	INTERNATIONAL MONETARY FUND AND AID DISPLACEMENT	INTERNATIONAL JOURNAL OF HEALTH SERVICES	3	4	Green OA article	Green OA	1	Stuckler-D	Stuckler	David	Author, Reprint Author	1	UNIV-OXFORD-CHRIST-CHURCH	UNIV-OXFORD	UNIV-OXFORD	University	University - Rank 001-025	0	0	0	0	0	1	0	0	0	0	0	0	0	0	1	0	0	0	0	0	0	1	1	0	Article
46099169	Conceptual Model for Partnership and Sustainability in Global Health	PUBLIC HEALTH NURSING	2	2	Toll access article	Toll access	1	Leffers-J	Leffers	Jeanne	Author, Reprint Author	1	UNIV-MASSACHUSETTS-DARTMOUTH	UNIV-MASSACHUSETTS-DARTMOUTH	UNIV-MASSACHUSETTS-DARTMOUTH	University	University: Unranked	0	0	0	0	0	0	0	1	0	0	0	0	0	0	0	0	0	0	0	0	1	1	0	0	Article
46116023	Surgery and Global Public Health: The UNC-Malawi Surgical Initiative as a Model for Sustainable Collaboration	WORLD JOURNAL OF SURGERY	6	2	Green OA article	Green OA	1	Qureshi-JS	Qureshi	Javeria S.	Author	1	UNIV-N-CAROLINA	UNIV-N-CAROLINA	UNIV-N-CAROLINA	University	University - Rank 051-100	0	0	0	0	0	1	0	0	0	0	0	0	0	0	0	0	1	0	0	0	0	1	0	0	Article
46120393	The International League Against Epilepsy at the threshold of its second century: year 1	EPILEPSIA	4	11	Green OA article	Green OA	1	Moshe-SL	Moshe	Solomon L.	Author, Reprint Author	1	ALBERT-EINSTEIN-COLL-MED	ALBERT-EINSTEIN-COLL-MED	ALBERT-EINSTEIN-COLL-MED	University	University: Unranked	0	0	0	0	0	1	0	0	0	0	0	0	0	0	0	0	0	0	0	0	1	1	0	0	Article
46128327	Health biotechnology innovation on a global stage	NATURE REVIEWS MICROBIOLOGY	4	4	Toll access article	Toll access	1	Thorsteinsdottir-H	Thorsteinsdottir	Halla	Author, Reprint Author	1	UNIV-TORONTO	UNIV-TORONTO	UNIV-TORONTO	University	University - Rank 001-025	0	0	0	0	0	0	0	1	0	0	0	0	0	0	1	0	0	0	0	0	0	1	1	0	Review
46135367	Worldwide burden of disease from exposure to second-hand smoke: a retrospective analysis of data from 192 countries	LANCET	5	5	Green OA article	Green OA	1	Oberg-M	Oberg	Mattias	Author	2	KAROLINSKA-INST	KAROLINSKA-INST	KAROLINSKA-INST	University	University - Rank 026-050	0	0	0	0	0	1	0	0	0	0	0	0	0	0	0	1	0	0	0	0	0	1	1	0	Article
46149658	Gender differences in health: results from SHARE, ELSA and HRS	EUROPEAN JOURNAL OF PUBLIC HEALTH	3	2	Green OA article	Green OA	1	Crimmins-EM	Crimmins	Eileen M.	Author, Reprint Author	1	UNIV-SO-CALIF	UNIV-SO-CALIF	UNIV-SO-CALIF	University	University - Rank 051-100	0	0	0	0	0	1	0	0	0	0	0	0	0	0	0	0	1	0	0	0	0	1	0	0	Article
46188342	The Clinical Nurse Leader - new nursing role with global implications	INTERNATIONAL NURSING REVIEW	2	2	Toll access article	Toll access	1	Baernholdt-M	Baernholdt	M.	Author, Reprint Author	1	UNIV-VIRGINIA	UNIV-VIRGINIA	UNIV-VIRGINIA	University	University - Rank 101-200	0	0	0	0	0	0	0	1	0	0	0	0	0	0	0	0	0	1	0	0	0	1	0	0	Article
46195391	The retained placenta: Historical and geographical rate variations	JOURNAL OF OBSTETRICS AND GYNAECOLOGY	4	3	Toll access article	Toll access	1	Cheung-WMC	Cheung	W. M. C.	Author, Reprint Author	1	WHISTON-HOSP	WHISTON-HOSP	WHISTON-HOSP	Hospital	Hospital	0	0	0	0	0	0	0	1	0	0	1	0	0	0	0	0	0	0	0	0	0	0	0	0	Article
46229995	Global Public Health Legal Responses to H1N1	JOURNAL OF LAW MEDICINE & ETHICS	4	4	Green OA article	Green OA	1	Gable-L	Gable	Lance	Author, Reprint Author	1	WAYNE-STATE-UNIV	WAYNE-STATE-UNIV	WAYNE-STATE-UNIV	University	University - Rank 201-500	0	0	0	0	0	1	0	0	0	0	0	0	0	0	0	0	0	0	1	0	0	1	0	0	Article
46230003	Right to Health Litigation and HIV/AIDS Policy	JOURNAL OF LAW MEDICINE & ETHICS	2	4	Green OA article	Green OA	1	Meier-BM	Meier	Benjamin Mason	Author, Reprint Author	1	UNIV-N-CAROLINA	UNIV-N-CAROLINA	UNIV-N-CAROLINA	University	University - Rank 051-100	0	0	0	0	0	1	0	0	0	0	0	0	0	0	0	0	1	0	0	0	0	1	0	0	Article
46251897	Global Estimates of Fatal Work-Related Diseases by Region and Disease Group, 2002	INTERNATIONAL JOURNAL OF OCCUPATIONAL AND ENVIRONMENTAL HEALTH	3	2	Green OA article	Green OA	1	Hamalainen-P	Hamalainen	Paivi	Author, Reprint Author	1	TAMPERE-UNIV-TECHNOL	TAMPERE-UNIV-TECHNOL	TAMPERE-UNIV-TECHNOL	University	University - Rank 501+	0	0	0	0	0	1	0	0	0	0	0	0	0	0	0	0	0	0	0	1	0	1	0	0	Article
46258801	Wikipedia: A Key Tool for Global Public Health Promotion	JOURNAL OF MEDICAL INTERNET RESEARCH	19	25	Gold OA article (APC)	Gold OA	1	Heilman-JM	Heilman	James M.	Author	2	UNIV-SASKATCHEWAN	UNIV-SASKATCHEWAN	UNIV-SASKATCHEWAN	University	University - Rank 201-500	0	2500	0	1	0	0	0	0	0	0	0	0	0	0	0	0	0	0	1	0	0	1	0	1	Article
46272632	National, regional, and global trends in body-mass index since 1980: systematic analysis of health examination surveys and epidemiological studies with 960 country-years and 9.1 million participants	LANCET	13	8	Green OA article	Green OA	1	Finucane-MM	Finucane	Mariel M.	Author	2	HARVARD-UNIV	HARVARD-UNIV	HARVARD-UNIV	University	University - Rank 001-025	0	0	0	0	0	1	0	0	0	0	0	0	0	0	1	0	0	0	0	0	0	1	1	0	Article
46272633	National, regional, and global trends in systolic blood pressure since 1980: systematic analysis of health examination surveys and epidemiological studies with 786 country-years and 5.4 million participants	LANCET	11	9	Toll access article	Toll access	1	Danaei-G	Danaei	Goodarz	Author	2	HARVARD-UNIV	HARVARD-UNIV	HARVARD-UNIV	University	University - Rank 001-025	0	0	0	0	0	0	0	1	0	0	0	0	0	0	1	0	0	0	0	0	0	1	1	0	Article
46272634	National, regional, and global trends in serum total cholesterol since 1980: systematic analysis of health examination surveys and epidemiological studies with 321 country-years and 3.0 million participants	LANCET	11	9	Green OA article	Green OA	1	Farzadfar-F	Farzadfar	Farshad	Author	2	HARVARD-UNIV	HARVARD-UNIV	HARVARD-UNIV	University	University - Rank 001-025	0	0	0	0	0	1	0	0	0	0	0	0	0	0	1	0	0	0	0	0	0	1	1	0	Article
46280221	Accounting for model uncertainty in estimating global burden of disease	BULLETIN OF THE WORLD HEALTH ORGANIZATION	7	7	Gold OA article (non-APC)	Gold OA	1	Vock-DM	Vock	David M.	Author, Reprint Author	1	N-CAROLINA-STATE-UNIV	N-CAROLINA-STATE-UNIV	N-CAROLINA-STATE-UNIV	University	University - Rank 201-500	0	0	0	0	1	0	0	0	0	0	0	0	0	0	0	0	0	0	1	0	0	1	0	0	Article
46287469	Prevalence of intellectual disability: A meta-analysis of population-based studies	RESEARCH IN DEVELOPMENTAL DISABILITIES	5	4	Green OA article	Green OA	1	Maulik-PK	Maulik	Pallab K.	Author, Reprint Author	1	GEORGE-INST-GLOBAL-HLTH	GEORGE-INST-GLOBAL-HLTH	GEORGE-INST-GLOBAL-HLTH	Research institute	Research Institute	0	0	0	0	0	1	0	0	0	0	0	0	1	0	0	0	0	0	0	0	0	0	0	0	Review
46319551	Recent worldwide sleep patterns and problems during adolescence: A review and meta-analysis of age, region, and sleep	SLEEP MEDICINE	3	1	Toll access article	Toll access	1	Gradisar-M	Gradisar	Michael	Author, Reprint Author	1	FLINDERS-UNIV-S-AUSTRALIA	FLINDERS-UNIV-S-AUSTRALIA	FLINDERS-UNIV-S-AUSTRALIA	University	University - Rank 201-500	0	0	0	0	0	0	0	1	0	0	0	0	0	0	0	0	0	0	1	0	0	1	0	0	Review
46323094	The global burden of Rh disease	ARCHIVES OF DISEASE IN CHILDHOOD-FETAL AND NEONATAL EDITION	2	2	Toll access article	Toll access	1	Zipursky-A	Zipursky	Alvin	Author, Reprint Author	1	HOSP-SICK-CHILDREN	HOSP-SICK-CHILDREN	HOSP-SICK-CHILDREN	Hospital	Hospital	0	0	0	0	0	0	0	1	0	0	1	0	0	0	0	0	0	0	0	0	0	0	0	0	Article
46337817	Tobacco Use, Exposure to Secondhand Smoke, and Cessation Counseling Training of Dental Students Around the World	JOURNAL OF DENTAL EDUCATION	6	3	Hybrid article	Hybrid	1	Warren-CW	Warren	Charles W.	Author, Reprint Author	1	CTR-DIS-CONTROL-&-PREVENT	CDC	CDC	Government	Government	0		0	0	0	0	1	0	0	1	0	0	0	0	0	0	0	0	0	0	0	0	0	1	Article
46396403	International Association of Gerontology and Geriatrics: A Global Agenda for Clinical Research and Quality of Care in Nursing Homes	JOURNAL OF THE AMERICAN MEDICAL DIRECTORS ASSOCIATION	18	19	Toll access article	Toll access	1	Tolson-D	Tolson	Debbie	Author	3	GLASGOW-CALEDONIAN-UNIV	GLASGOW-CALEDONIAN-UNIV	GLASGOW-CALEDONIAN-UNIV	University	University - Rank 501+	0	0	0	0	0	0	0	1	0	0	0	0	0	0	0	0	0	0	0	1	0	1	0	0	Article
46410062	Present epidemiology of tuberculosis. Prevention and control programs	ENFERMEDADES INFECCIOSAS Y MICROBIOLOGIA CLINICA	3	3	Green OA article	Green OA	1	Orcau-A	Orcau	Angels	Author	1	CIBER-EPIDEMIOL-&-SALUD-PUBL-CIBERESP	CIBERESP	CIBERESP	Research institute	Research Institute	0	0	0	0	0	1	0	0	0	0	0	0	1	0	0	0	0	0	0	0	0	0	0	0	Article
46421802	Cool aid? Health, wellbeing and place in the work of Bono and U2	HEALTH & PLACE	4	4	Toll access article	Toll access	1	Andrews-GJ	Andrews	Gavin J.	Author, Reprint Author	1	MCMASTER-UNIV	MCMASTER-UNIV	MCMASTER-UNIV	University	University - Rank 101-200	0	0	0	0	0	0	0	1	0	0	0	0	0	0	0	0	0	1	0	0	0	1	0	0	Article
46426839	Global Health and the Global Economic Crisis	AMERICAN JOURNAL OF PUBLIC HEALTH	3	3	Green OA article	Green OA	1	Benatar-SR	Benatar	Solomon R.	Author, Reprint Author	1	UNIV-CAPE-TOWN	UNIV-CAPE-TOWN	UNIV-CAPE-TOWN	University	University - Rank 101-200	0	0	0	0	0	1	0	0	0	0	0	0	0	0	0	0	0	1	0	0	0	1	0	0	Article
46436087	Tuberculosis and poverty: what is being done	INTERNATIONAL JOURNAL OF TUBERCULOSIS AND LUNG DISEASE	5	1	Green OA article	Green OA	1	Creswell-J	Creswell	J.	Author, Reprint Author	1	WHO	WHO	WHO	Non-profit	Non-profit	0	0	0	0	0	1	0	0	0	0	0	1	0	0	0	0	0	0	0	0	0	0	0	0	Article
46442665	Multi-country, cross-national comparison of youth tobacco use: Findings from Global School-based Health Surveys	ADDICTIVE BEHAVIORS	2	1	Toll access article	Toll access	1	Page-RM	Page	Randy M.	Author, Reprint Author	1	BRIGHAM-YOUNG-UNIV	BRIGHAM-YOUNG-UNIV	BRIGHAM-YOUNG-UNIV	University	University: Unranked	0	0	0	0	0	0	0	1	0	0	0	0	0	0	0	0	0	0	0	0	1	1	0	0	Article
46442768	Developing a global strategy to prevent Alzheimer's disease: Leon Thal Symposium 2010	ALZHEIMERS & DEMENTIA	17	18	Toll access article	Toll access	1	Khachaturian-ZS	Khachaturian	Zaven S.	Author, Reprint Author	1	CAMPAIGN-PREVENT-ALZHEIMERS-DIS-2020	CAMPAIGN-PREVENT-ALZHEIMERS-DIS-2020	CAMPAIGN-PREVENT-ALZHEIMERS-DIS-2020	Non-profit	Non-profit	0	0	0	0	0	0	0	1	0	0	0	1	0	0	0	0	0	0	0	0	0	0	0	0	Article
46463468	A global map for traumatic spinal cord injury epidemiology: towards a living data repository for injury prevention	SPINAL CORD	6	7	Toll access article	Toll access	1	Cripps-RA	Cripps	R. A.	Author	2	FLINDERS-UNIV-S-AUSTRALIA	FLINDERS-UNIV-S-AUSTRALIA	FLINDERS-UNIV-S-AUSTRALIA	University	University - Rank 201-500	0	0	0	0	0	0	0	1	0	0	0	0	0	0	0	0	0	0	1	0	0	1	0	0	Article
46463787	Global health and climate change: moving from denial and catastrophic fatalism to positive action	PHILOSOPHICAL TRANSACTIONS OF THE ROYAL SOCIETY A-MATHEMATICAL PHYSICAL AND ENGINEERING SCIENCES	5	4	Toll access article	Toll access	1	Costello-A	Costello	Anthony	Author, Reprint Author	1	UCL	UCL	UCL	University	University - Rank 001-025	0	0	0	0	0	0	0	1	0	0	0	0	0	0	1	0	0	0	0	0	0	1	1	0	Article
46465347	Developing Medicines in Line with Global Public Health Needs: The Role of the World Health Organization	CAMBRIDGE QUARTERLY OF HEALTHCARE ETHICS	1	2	Toll access article	Toll access	1	Pang-T	Pang	Tikki	Author, Reprint Author	1	WHO	WHO	WHO	Non-profit	Non-profit	1	0	0	0	0	0	0	1	0	0	0	1	0	0	0	0	0	0	0	0	0	0	0	0	Article
46511137	Clinical research and global health: Mentoring the next generation of health care students	GLOBAL PUBLIC HEALTH	5	7	Green OA article	Green OA	1	Shah-SK	Shah	Sural K.	Author	2	PENN-STATE-UNIV	PENN-STATE-UNIV	PENN-STATE-UNIV	University	University - Rank 051-100	0	0	0	0	0	1	0	0	0	0	0	0	0	0	0	0	1	0	0	0	0	1	0	0	Article
46512555	Integrating CanMEDS competencies into global health electives: an innovative elective program	CANADIAN JOURNAL OF EMERGENCY MEDICINE	3	4	Toll access article	Toll access	1	Valani-R	Valani	Rahim	Author, Reprint Author	1	MCMASTER-UNIV	MCMASTER-UNIV	MCMASTER-UNIV	University	University - Rank 101-200	0	0	0	0	0	0	0	1	0	0	0	0	0	0	0	0	0	1	0	0	0	1	0	0	Article
46534866	Promoting Global Cardiovascular Health Moving Forward	CIRCULATION	3	3	Hybrid article	Hybrid	1	Fuster-V	Fuster	Valentin	Author, Reprint Author	1	MT-SINAI-MED-CTR	MT-SINAI-MED-CTR	MT-SINAI-MED-CTR	Hospital	Hospital	0	4600	0	0	0	0	1	0	0	0	1	0	0	0	0	0	0	0	0	0	0	0	0	1	Article
46550262	Towards a Characterization of a Motive whose Ultimate Goal is to Increase the Welfare of the World: Quixoteism	SPANISH JOURNAL OF PSYCHOLOGY	2	1	Toll access article	Toll access	1	Salgado-S	Salgado	Sergio	Author	1	UNIV-AUTONOMA-MADRID	AUTONOMOUS-UNIV-MADRID	AUTONOMOUS-UNIV-MADRID	University	University - Rank 201-500	0	0	0	0	0	0	0	1	0	0	0	0	0	0	0	0	0	0	1	0	0	1	0	0	Article
46558617	Major reductions in global suicide numbers can be made rapidly through pesticide regulation without the need for psychosocial interventions	SOCIAL SCIENCE & MEDICINE	2	2	Green OA article	Green OA	1	Eddleston-M	Eddleston	Michael	Author, Reprint Author	1	UNIV-EDINBURGH	UNIV-EDINBURGH	UNIV-EDINBURGH	University	University - Rank 026-050	0	0	0	0	0	1	0	0	0	0	0	0	0	0	0	1	0	0	0	0	0	1	1	0	Article
46563116	Anthelmintic resistance in nematode parasites of cattle: a global issue?	TRENDS IN PARASITOLOGY	2	1	Toll access article	Toll access	1	Sutherland-IA	Sutherland	Ian A.	Author, Reprint Author	1	AGRES-GRASSLANDS	AGRES-GRASSLANDS	AGRES-GRASSLANDS	Research institute	Research Institute	0	0	0	0	0	0	0	1	0	0	0	0	1	0	0	0	0	0	0	0	0	0	0	0	Review
46577121	Priority actions for the non-communicable disease crisis	LANCET	44	31	Green OA article	Green OA	1	Beaglehole-R	Beaglehole	Robert	Author, Reprint Author	1	UNIV-AUCKLAND	UNIV-AUCKLAND	UNIV-AUCKLAND	University	University - Rank 101-200	0	0	0	0	0	1	0	0	0	0	0	0	0	0	0	0	0	1	0	0	0	1	0	0	Article
46618472	Research in global health and North-South partnership challenges	CANADIAN JOURNAL OF PUBLIC HEALTH-REVUE CANADIENNE DE SANTE PUBLIQUE	2	2	Green OA article	Green OA	1	Ridde-V	Ridde	Valery	Author, Reprint Author	1	CHUM	UNIV-MONTREAL	UNIV-MONTREAL-HOSP	Hospital	Hospital	1	0	0	0	0	1	0	0	0	0	1	0	0	0	0	0	0	0	0	0	0	0	0	0	Article
46621496	A growing global network's role in outbreak response: AFHSC-GEIS 2008-2009	BMC PUBLIC HEALTH	15	10	Gold OA article (APC)	Gold OA	1	Johns-MC	Johns	Matthew C.	Author, Reprint Author	1	USAF	USAF	USAF	Government	Government	0	2145	0	1	0	0	0	0	0	1	0	0	0	0	0	0	0	0	0	0	0	0	0	1	Review
46621498	Training initiatives within the AFHSC-Global Emerging Infections Surveillance and Response System: support for IHR (2005)	BMC PUBLIC HEALTH	10	18	Gold OA article (APC)	Gold OA	1	Otto-JL	Otto	Jean L.	Author	1	USAF	USAF	USAF	Government	Government	0	2145	0	1	0	0	0	0	0	1	0	0	0	0	0	0	0	0	0	0	0	0	0	1	Review
46621499	Department of Defense influenza and other respiratory disease surveillance during the 2009 pandemic	BMC PUBLIC HEALTH	35	25	Gold OA article (APC)	Gold OA	1	Burke-RL	Burke	Ronald L.	Author, Reprint Author	1	USAF	USAF	USAF	Government	Government	0	2145	0	1	0	0	0	0	0	1	0	0	0	0	0	0	0	0	0	0	0	0	0	1	Review
46621500	Enteric disease surveillance under the AFHSC-GEIS: Current efforts, landscape analysis and vision forward	BMC PUBLIC HEALTH	5	7	Gold OA article (APC)	Gold OA	1	Money-NN	Money	Nisha N.	Author	2	USAF	USAF	USAF	Government	Government	0	2145	0	1	0	0	0	0	0	1	0	0	0	0	0	0	0	0	0	0	0	0	0	1	Review
46621502	Malaria and other vector-borne infection surveillance in the US Department of Defense Armed Forces Health Surveillance Center-Global Emerging Infections Surveillance program: review of 2009 accomplishments	BMC PUBLIC HEALTH	28	9	Gold OA article (APC)	Gold OA	1	Fukuda-MM	Fukuda	Mark M.	Author, Reprint Author	1	USAF	USAF	USAF	Government	Government	0	2145	0	1	0	0	0	0	0	1	0	0	0	0	0	0	0	0	0	0	0	0	0	1	Review
46625701	Characterization of Global Patterns and the Genetics of Fusidic Acid Resistance	CLINICAL INFECTIOUS DISEASES	3	3	Hybrid article	Hybrid	1	Farrell-DJ	Farrell	David J.	Author, Reprint Author	1	JMI-LABS	JMI-LABS	JMI-LABS	Company	Company	0	3500	0	0	0	0	1	0	1	0	0	0	0	0	0	0	0	0	0	0	0	0	0	1	Article
46627435	Access to blood donation of men who have sex with men and impact on the risk of HIV transmission by transfusion: International overview	TRANSFUSION CLINIQUE ET BIOLOGIQUE	2	1	Toll access article	Toll access	1	Pillonel-J	Pillonel	J.	Author, Reprint Author	1	INST-VEILLE-SANIT	INST-VEILLE-SANIT	INST-VEILLE-SANIT	Government	Government	0	0	0	0	0	0	0	1	0	1	0	0	0	0	0	0	0	0	0	0	0	0	0	0	Article
46630573	The comprehensive ICF core sets for spinal cord injury from the perspective of occupational therapists: a worldwide validation study using the Delphi technique	SPINAL CORD	4	4	Toll access article	Toll access	1	Herrmann-KH	Herrmann	K. H.	Author	2	SPF	SPF	SPF	Non-profit	Non-profit	0	0	0	0	0	0	0	1	0	0	0	1	0	0	0	0	0	0	0	0	0	0	0	0	Article
46638572	Of silver bullets and red herrings: invited commentary to Fisk et al.	TROPICAL MEDICINE & INTERNATIONAL HEALTH	3	3	Hybrid article	Hybrid	1	Razum-O	Razum	O.	Author, Reprint Author	1	UNIV-BIELEFELD	UNIV-BIELEFELD	UNIV-BIELEFELD	University	University - Rank 201-500	0	3000	0	0	0	0	1	0	0	0	0	0	0	0	0	0	0	0	1	0	0	1	0	1	Article
46649944	Global Burden of Disease estimates of depression - how reliable is the epidemiological evidence?	JOURNAL OF THE ROYAL SOCIETY OF MEDICINE	3	1	Green OA article	Green OA	1	Brhlikova-P	Brhlikova	Petra	Author, Reprint Author	1	UNIV-EDINBURGH	UNIV-EDINBURGH	UNIV-EDINBURGH	University	University - Rank 026-050	0	0	0	0	0	1	0	0	0	0	0	0	0	0	0	1	0	0	0	0	0	1	1	0	Article
46653668	The World of Dementia Beyond 2020	JOURNAL OF THE AMERICAN GERIATRICS SOCIETY	9	10	Toll access article	Toll access	1	Brodaty-H	Brodaty	Henry	Author, Reprint Author	1	UNIV-NEW-S-WALES	UNIV-NEW-S-WALES	UNIV-NEW-S-WALES	University	University - Rank 051-100	0	0	0	0	0	0	0	1	0	0	0	0	0	0	0	0	1	0	0	0	0	1	0	0	Article
46679731	Promoting Global Population Health While Constraining the Environmental Footprint	Annual Review of Public Health	2	1	Green OA article	Green OA	1	McMichael-AJ	McMichael	A. J.	Author, Reprint Author	1	AUSTRALIAN-NATL-UNIV	AUSTRALIAN-NATL-UNIV	AUSTRALIAN-NATL-UNIV	University	University - Rank 026-050	0	0	0	0	0	1	0	0	0	0	0	0	0	0	0	1	0	0	0	0	0	1	1	0	Review
46681911	International Committee for Monitoring Assisted Reproductive Technology (ICMART) world report: assisted reproductive technology 2003	FERTILITY AND STERILITY	7	7	Toll access article	Toll access	1	Nygren-KG	Nygren	Karl G.	Author	2	QUEEN-SOPHIA-HOSP	QUEEN-SOPHIA-HOSP	QUEEN-SOPHIA-HOSP	Hospital	Hospital	0	0	0	0	0	0	0	1	0	0	1	0	0	0	0	0	0	0	0	0	0	0	0	0	Article
46696280	Should Global Burden of Disease Estimates Include Depression as a Risk Factor for Coronary Heart Disease?	BMC MEDICINE	4	4	Gold OA article (APC)	Gold OA	1	Charlson-FJ	Charlson	Fiona J.	Author	1	QUEENSLAND-CTR-MENTAL-HLTH-RES	QUEENSLAND-CTR-MENTAL-HLTH-RES	QUEENSLAND-CTR-MENTAL-HLTH-RES	Research institute	Research Institute	0	2785	0	1	0	0	0	0	0	0	0	0	1	0	0	0	0	0	0	0	0	0	0	1	Article
46701973	Cross-National Sources of Health Inequality: Education and Tobacco Use in the World Health Survey	DEMOGRAPHY	2	2	Green OA article	Green OA	1	Pampel-FC	Pampel	Fred C.	Author, Reprint Author	1	UNIV-COLORADO	UNIV-COLORADO	UNIV-COLORADO	University	University - Rank 101-200	0	0	0	0	0	1	0	0	0	0	0	0	0	0	0	0	0	1	0	0	0	1	0	0	Article
46707337	Aging, Transition, and Estimating the Global Burden of Disease	PLOS ONE	3	2	Gold OA article (APC)	Gold OA	1	Seligman-BJ	Seligman	Benjamin J.	Author, Reprint Author	1	STANFORD-UNIV-SCH-MED	STANFORD-UNIV	STANFORD-UNIV	University	University - Rank 001-025	0	1495	0	1	0	0	0	0	0	0	0	0	0	0	1	0	0	0	0	0	0	1	1	1	Article
46715356	Global public health training in the UK: preparing for the future	JOURNAL OF PUBLIC HEALTH	3	3	Hybrid article	Hybrid	1	Lee-ACK	Lee	Andrew C. K.	Author, Reprint Author	1	UNIV-SHEFFIELD	UNIV-SHEFFIELD	UNIV-SHEFFIELD	University	University - Rank 101-200	0	2400	0	0	0	0	1	0	0	0	0	0	0	0	0	0	0	1	0	0	0	1	0	1	Article
46720293	Social Determinants of Smoking in Low- and Middle-Income Countries: Results from the World Health Survey	PLOS ONE	4	4	Gold OA article (APC)	Gold OA	1	Hosseinpoor-AR	Hosseinpoor	Ahmad Reza	Author, Reprint Author	1	WHO	WHO	WHO	Non-profit	Non-profit	0	1495	0	1	0	0	0	0	0	0	0	1	0	0	0	0	0	0	0	0	0	0	0	1	Article
46741480	Surgery in Global Health Delivery	MOUNT SINAI JOURNAL OF MEDICINE	8	9	Toll access article	Toll access	1	Ozgediz-D	Ozgediz	Doruk	Author, Reprint Author	1	SUNY-BUFFALO	SUNY-BUFFALO	SUNY-BUFFALO	University	University - Rank 201-500	0	0	0	0	0	0	0	1	0	0	0	0	0	0	0	0	0	0	1	0	0	1	0	0	Article
46741484	Role of Students in Global Health Delivery	MOUNT SINAI JOURNAL OF MEDICINE	8	10	Green OA article	Green OA	1	Finch-TH	Finch	Thomas H.	Author	2	WEILL-CORNELL-MED-COLL	CORNELL-UNIV	CORNELL-UNIV	University	University - Rank 001-025	0	0	0	0	0	1	0	0	0	0	0	0	0	0	1	0	0	0	0	0	0	1	1	0	Article
46741485	Improving the Delivery of Global Tobacco Control	MOUNT SINAI JOURNAL OF MEDICINE	3	2	Toll access article	Toll access	1	Bitton-A	Bitton	Asaf	Author, Reprint Author	1	HARVARD-UNIV	HARVARD-UNIV	HARVARD-UNIV	University	University - Rank 001-025	0	0	0	0	0	0	0	1	0	0	0	0	0	0	1	0	0	0	0	0	0	1	1	0	Article
46741488	Community Health Workers in Global Health: Scale and Scalability	MOUNT SINAI JOURNAL OF MEDICINE	5	3	Green OA article	Green OA	1	Liu-A	Liu	Anne	Author	1	COLUMBIA-UNIV	COLUMBIA-UNIV	COLUMBIA-UNIV	University	University - Rank 001-025	0	0	0	0	0	1	0	0	0	0	0	0	0	0	1	0	0	0	0	0	0	1	1	0	Article
46741490	Confronting Intimate Partner Violence: A Global Health Priority	MOUNT SINAI JOURNAL OF MEDICINE	2	4	Green OA article	Green OA	1	Chibber-KS	Chibber	Karuna S.	Author	2	UNIV-CALIF-SAN-FRANCISCO	UCSF	UCSF	University	University - Rank 001-025	0	0	0	0	0	1	0	0	0	0	0	0	0	0	1	0	0	0	0	0	0	1	1	0	Article
46741491	Strategic, Value-Based Delivery in Global Health Care: Innovations at Harvard University and Brigham and Women's Hospital	MOUNT SINAI JOURNAL OF MEDICINE	10	4	Toll access article	Toll access	1	Weintraub-RL	Weintraub	Rebecca L.	Author, Reprint Author	1	BRIGHAM-&-WOMENS-HOSP	BRIGHAM-&-WOMENS-HOSP	BRIGHAM-&-WOMENS-HOSP	Hospital	Hospital	0	0	0	0	0	0	0	1	0	0	1	0	0	0	0	0	0	0	0	0	0	0	0	0	Article
46741492	New Academic Partnerships in Global Health: Innovations at Mount Sinai School of Medicine	MOUNT SINAI JOURNAL OF MEDICINE	10	3	Green OA article	Green OA	1	Landrigan-PJ	Landrigan	Philip J.	Author, Reprint Author	1	MT-SINAI-SCH-MED	MT-SINAI-MED-CTR	MT-SINAI-MED-CTR	Hospital	Hospital	0	0	0	0	0	1	0	0	0	0	1	0	0	0	0	0	0	0	0	0	0	0	0	0	Article
46743162	Similarities and differences between spondyloarthritis in Asia and other parts of the world	CURRENT OPINION IN RHEUMATOLOGY	4	1	Toll access article	Toll access	1	Zhang-SL	Zhang	Shengli	Author	1	CHINESE-PEOPLES-LIBERAT-ARMY-GEN-HOSP	CHINESE-PEOPLES-LIBERAT-ARMY-GEN-HOSP	CHINESE-PEOPLES-LIBERAT-ARMY-GEN-HOSP	Hospital	Hospital	0	0	0	0	0	0	0	1	0	0	1	0	0	0	0	0	0	0	0	0	0	0	0	0	Review
46747621	Recent perspectives on the global epidemiology of childhood eczema	ALLERGOLOGIA ET IMMUNOPATHOLOGIA	1	2	Toll access article	Toll access	1	Flohr-C	Flohr	C.	Author, Reprint Author	1	ST-THOMAS-HOSP	ST-THOMAS-HOSP	ST-THOMAS-HOSP	Hospital	Hospital	1	0	0	0	0	0	0	1	0	0	1	0	0	0	0	0	0	0	0	0	0	0	0	0	Review
46752032	UN resolution on the prevention and control of non-communicable diseases: An opportunity for global action	GLOBAL PUBLIC HEALTH	3	3	Toll access article	Toll access	1	Mamudu-HM	Mamudu	Hadii M.	Author	2	E-TENNESSEE-STATE-UNIV	E-TENNESSEE-STATE-UNIV	E-TENNESSEE-STATE-UNIV	University	University: Unranked	0	0	0	0	0	0	0	1	0	0	0	0	0	0	0	0	0	0	0	0	1	1	0	0	Article
46763974	Coverage Policy for Neurorehabilitation: An International Perspective	NEUROREHABILITATION AND NEURAL REPAIR	2	2	Toll access article	Toll access	1	Weinrich-M	Weinrich	Michael	Author, Reprint Author	1	NIH	NIH	NIH	Government	Government	0	0	0	0	0	0	0	1	0	1	0	0	0	0	0	0	0	0	0	0	0	0	0	0	Article
46798187	Challenges of global surveillance during an influenza pandemic	PUBLIC HEALTH	3	1	Green OA article	Green OA	1	Briand-S	Briand	S.	Author, Reprint Author	1	WHO	WHO	WHO	Non-profit	Non-profit	0	0	0	0	0	1	0	0	0	0	0	1	0	0	0	0	0	0	0	0	0	0	0	0	Review
46825263	A Globally Available Internet-Based Patient Survey of Pemphigus Vulgaris: Epidemiology and Disease Characteristics	DERMATOLOGIC CLINICS	10	7	Toll access article	Toll access	1	Gupta-VK	Gupta	Vibha K.	Author	2	MICHIGAN-STATE-UNIV	MICHIGAN-STATE-UNIV	MICHIGAN-STATE-UNIV	University	University - Rank 101-200	0	0	0	0	0	0	0	1	0	0	0	0	0	0	0	0	0	1	0	0	0	1	0	0	Article
46825291	A Global Perspective on Gastrointestinal Diseases	GASTROENTEROLOGY CLINICS OF NORTH AMERICA	3	3	Toll access article	Toll access	1	Menon-R	Menon	Radha	Author	2	DREXEL-UNIV	DREXEL-UNIV	DREXEL-UNIV	University	University - Rank 201-500	0	0	0	0	0	0	0	1	0	0	0	0	0	0	0	0	0	0	1	0	0	1	0	0	Article
46827958	Access to care and medicines, burden of health care expenditures, and risk protection: Results from the World Health Survey	HEALTH POLICY	6	2	Green OA article	Green OA	1	Wagner-AK	Wagner	Anita K.	Author, Reprint Author	1	HARVARD-UNIV	HARVARD-UNIV	HARVARD-UNIV	University	University - Rank 001-025	1	0	0	0	0	1	0	0	0	0	0	0	0	0	1	0	0	0	0	0	0	1	1	0	Article
46859576	Global Health: Evolving Meanings	INFECTIOUS DISEASE CLINICS OF NORTH AMERICA	2	5	Green OA article	Green OA	1	Velji-A	Velji	Anvar	Author, Reprint Author	1	KAISER-PERMANENTE	KAISER-PERMANENTE	KAISER-PERMANENTE	Company	Company	0	0	0	0	0	1	0	0	1	0	0	0	0	0	0	0	0	0	0	0	0	0	0	0	Article
46859577	Global Health and the Role of Universities in the Twenty-First Century	INFECTIOUS DISEASE CLINICS OF NORTH AMERICA	2	3	Green OA article	Green OA	1	Bryant-JH	Bryant	John H.	Author	2	JOHNS-HOPKINS-SCH-PUBL-HLTH	JOHNS-HOPKINS-UNIV	JOHNS-HOPKINS-UNIV	University	University - Rank 001-025	0	0	0	0	0	1	0	0	0	0	0	0	0	0	1	0	0	0	0	0	0	1	1	0	Article
46859578	Global Health Education Consortium: 20 Years of Leadership in Global Health and Global Health Education	INFECTIOUS DISEASE CLINICS OF NORTH AMERICA	1	2	Green OA article	Green OA	1	Velji-A	Velji	Anvar	Author, Reprint Author	1	KAISER-PERMANENTE	KAISER-PERMANENTE	KAISER-PERMANENTE	Company	Company	1	0	0	0	0	1	0	0	1	0	0	0	0	0	0	0	0	0	0	0	0	0	0	0	Article
46859579	Global Health: Networking Innovative Academic Institutions	INFECTIOUS DISEASE CLINICS OF NORTH AMERICA	2	1	Green OA article	Green OA	1	Palsdottir-B	Palsdottir	Bjorg	Author	1	TRAINING-HLTH-EQU-NETWORK	TRAINING-HLTH-EQU-NETWORK	TRAINING-HLTH-EQU-NETWORK	Research institute	Research Institute	0	0	0	0	0	1	0	0	0	0	0	0	1	0	0	0	0	0	0	0	0	0	0	0	Article
46859580	Teaching the Basics: Core Competencies in Global Health	INFECTIOUS DISEASE CLINICS OF NORTH AMERICA	3	2	Green OA article	Green OA	1	Arthur-MAM	Arthur	Megan A. M.	Author	1	MCGILL-UNIV	MCGILL-UNIV	MCGILL-UNIV	University	University - Rank 026-050	0	0	0	0	0	1	0	0	0	0	0	0	0	0	0	1	0	0	0	0	0	1	1	0	Article
46859583	Building a Global Health Education Network for Clinical Care and Research. The Benefits and Challenges of Distance Learning Tools. Lessons Learned from the Hopkins Center for Clinical Global Health Education	INFECTIOUS DISEASE CLINICS OF NORTH AMERICA	3	1	Green OA article	Green OA	1	Bollinger-RC	Bollinger	Robert C.	Author, Reprint Author	1	JOHNS-HOPKINS-UNIV	JOHNS-HOPKINS-UNIV	JOHNS-HOPKINS-UNIV	University	University - Rank 001-025	0	0	0	0	0	1	0	0	0	0	0	0	0	0	1	0	0	0	0	0	0	1	1	0	Article
46859584	The Afya Bora Consortium: An Africa-US Partnership to Train Leaders in Global Health	INFECTIOUS DISEASE CLINICS OF NORTH AMERICA	2	3	Green OA article	Green OA	1	Farquhar-C	Farquhar	Carey	Author, Reprint Author	1	UNIV-WASHINGTON	UNIV-WASHINGTON	UNIV-WASHINGTON	University	University - Rank 026-050	0	0	0	0	0	1	0	0	0	0	0	0	0	0	0	1	0	0	0	0	0	1	1	0	Article
46859587	Global Health: Governance and Policy Development	INFECTIOUS DISEASE CLINICS OF NORTH AMERICA	1	2	Green OA article	Green OA	1	Kelley-PW	Kelley	Patrick W.	Author, Reprint Author	1	NATL-ACAD	NATL-ACAD	NATL-ACAD	Scientific association	Scientific association	1	0	0	0	0	1	0	0	0	0	0	0	0	1	0	0	0	0	0	0	0	0	0	0	Article
46859588	The Role of Treaties, Agreements, Conventions, and Other International Instruments in Global Health	INFECTIOUS DISEASE CLINICS OF NORTH AMERICA	2	2	Green OA article	Green OA	1	Kates-J	Kates	Jennifer	Author, Reprint Author	1	KAISER-FAMILY-FDN	KAISER-FAMILY-FDN	KAISER-FAMILY-FDN	Non-profit	Non-profit	0	0	0	0	0	1	0	0	0	0	0	1	0	0	0	0	0	0	0	0	0	0	0	0	Article
46861687	Mapping the Global Distribution of Trachoma: Why an Updated Atlas Is Needed	PLOS NEGLECTED TROPICAL DISEASES	8	3	Gold OA article (APC)	Gold OA	1	Smith-JL	Smith	Jennifer L.	Author, Reprint Author	1	LONDON-SCH-HYG-&-TROP-MED	UCL	UCL	University	University - Rank 001-025	0	2250	0	1	0	0	0	0	0	0	0	0	0	0	1	0	0	0	0	0	0	1	1	1	Article
46914452	Can a Low-Resource-Use Blood Pressure Device Impact on Global Maternal Mortality?	HYPERTENSION IN PREGNANCY	4	1	Toll access article	Toll access	1	Baker-EC	Baker	Elinor Chloe	Author	1	KINGS-COLL-LONDON	KINGS-COLL-LONDON	KINGS-COLL-LONDON	University	University - Rank 026-050	0	0	0	0	0	0	0	1	0	0	0	0	0	0	0	1	0	0	0	0	0	1	1	0	Review
46921579	The importance of governance and reliable veterinary certification	REVUE SCIENTIFIQUE ET TECHNIQUE DE L OFFICE INTERNATIONAL DES EPIZOOTIES	2	1	Toll access article	Toll access	1	Pastoret-PP	Pastoret	P-P.	Author, Reprint Author	1	WORLD-ORG-ANIM-HLTH	WORLD-ORG-ANIM-HLTH	WORLD-ORG-ANIM-HLTH	Non-profit	Non-profit	0	0	0	0	0	0	0	1	0	0	0	1	0	0	0	0	0	0	0	0	0	0	0	0	Article
46925063	Alcohol-related negative consequences among drinkers around the world	ADDICTION	10	14	Green OA article	Green OA	1	Graham-K	Graham	Kathryn	Author, Reprint Author	1	CTR-ADDICT-&-MENTAL-HLTH	CTR-ADDICT-&-MENTAL-HLTH	CTR-ADDICT-&-MENTAL-HLTH	Research institute	Research Institute	0	0	0	0	0	1	0	0	0	0	0	0	1	0	0	0	0	0	0	0	0	0	0	0	Article
46926349	National, regional, and global trends in fasting plasma glucose and diabetes prevalence since 1980: systematic analysis of health examination surveys and epidemiological studies with 370 country-years and 2.7 million participants	LANCET	15	11	Toll access article	Toll access	1	Danaei-G	Danaei	Goodarz	Author	2	HARVARD-UNIV	HARVARD-UNIV	HARVARD-UNIV	University	University - Rank 001-025	0	0	0	0	0	0	0	1	0	0	0	0	0	0	1	0	0	0	0	0	0	1	1	0	Article
46926353	Tuberculosis	LANCET	2	5	Toll access article	Toll access	1	Lawn-SD	Lawn	Stephen D.	Author	4	UNIV-CAPE-TOWN	UNIV-CAPE-TOWN	UNIV-CAPE-TOWN	University	University - Rank 101-200	0	0	0	0	0	0	0	1	0	0	0	0	0	0	0	0	0	1	0	0	0	1	0	0	Article
46927818	Projections of global health outcomes from 2005 to 2060 using the International Futures integrated forecasting model	BULLETIN OF THE WORLD HEALTH ORGANIZATION	7	2	Gold OA article (non-APC)	Gold OA	1	Hughes-BB	Hughes	Barry B.	Author	1	UNIV-DENVER	UNIV-DENVER	UNIV-DENVER	University	University - Rank 201-500	0	0	0	0	1	0	0	0	0	0	0	0	0	0	0	0	0	0	1	0	0	1	0	0	Article
46928328	A review of global progress toward the Millennium Development Goal 1 Hunger Target	FOOD AND NUTRITION BULLETIN	2	2	Toll access article	Toll access	1	Fanzo-JC	Fanzo	Jessica C.	Author, Reprint Author	1	BIOVERS-INT	BIOVERS-INT	BIOVERS-INT	Research institute	Research Institute	0	0	0	0	0	0	0	1	0	0	0	0	1	0	0	0	0	0	0	0	0	0	0	0	Review
46942392	WHO World Report on Disability: A review	DISABILITY AND HEALTH JOURNAL	1	1	Toll access article	Toll access	1	Krahn-GL	Krahn	Gloria L.	Author, Reprint Author	1	CTR-DIS-CONTROL-&-PREVENT	CDC	CDC	Government	Government	1	0	0	0	0	0	0	1	0	1	0	0	0	0	0	0	0	0	0	0	0	0	0	0	Review
46947585	Global Variation in the Relative Burden of Stroke and Ischemic Heart Disease	CIRCULATION	2	1	Hybrid article	Hybrid	1	Kim-AS	Kim	Anthony S.	Author, Reprint Author	1	UNIV-CALIF-SAN-FRANCISCO	UCSF	UCSF	University	University - Rank 001-025	0	4600	0	0	0	0	1	0	0	0	0	0	0	0	1	0	0	0	0	0	0	1	1	1	Article
46953291	Rationale for the use of immunomodulatory therapies in the Global Initiative for Asthma (GINA) step V asthma other than oral glucocorticosteroids	INTERNAL MEDICINE JOURNAL	3	3	Toll access article	Toll access	1	Domingo-C	Domingo	C.	Author, Reprint Author	1	CORP-PARC-TAULI	CORP-PARC-TAULI	CORP-PARC-TAULI	Hospital	Hospital	0	0	0	0	0	0	0	1	0	0	1	0	0	0	0	0	0	0	0	0	0	0	0	0	Article
46956161	Tuberculosis Among Participants in an Academic Global Health Medical Exchange Program	JOURNAL OF GENERAL INTERNAL MEDICINE	3	4	Green OA article	Green OA	1	Gardner-A	Gardner	Adrian	Author, Reprint Author	1	BROWN-UNIV	BROWN-UNIV	BROWN-UNIV	University	University - Rank 051-100	0	0	0	0	0	1	0	0	0	0	0	0	0	0	0	0	1	0	0	0	0	1	0	0	Article
46960239	Developing a global health practitioner: Time to act?	MEDICAL TEACHER	2	2	Toll access article	Toll access	1	Mckimm-J	Mckimm	Judy	Author, Reprint Author	1	SWANSEA-UNIV	SWANSEA-UNIV	SWANSEA-UNIV	University	University - Rank 201-500	0	0	0	0	0	0	0	1	0	0	0	0	0	0	0	0	0	0	1	0	0	1	0	0	Article
46960240	A model for linkage between health professions education and health: FAIMER international faculty development initiatives	MEDICAL TEACHER	4	4	Toll access article	Toll access	1	Burdick-W	Burdick	William	Author, Reprint Author	1	FAIMER	FAIMER-INST	FAIMER-INST	Non-profit	Non-profit	0	0	0	0	0	0	0	1	0	0	0	1	0	0	0	0	0	0	0	0	0	0	0	0	Article
46960242	The contribution and challenges of electives in the development of social accountability in medical students	MEDICAL TEACHER	2	2	Toll access article	Toll access	1	MurdochEaton-D	Murdoch-Eaton	Deborah	Author, Reprint Author	1	UNIV-LEEDS	UNIV-LEEDS	UNIV-LEEDS	University	University - Rank 101-200	0	0	0	0	0	0	0	1	0	0	0	0	0	0	0	0	0	1	0	0	0	1	0	0	Article
46960246	Social accountability of medical education: Aspects on global accreditation	MEDICAL TEACHER	2	2	Toll access article	Toll access	1	Lindgren-S	Lindgren	Stefan	Author, Reprint Author	1	UNIV-HOSP-MAS	UNIV-HOSP-MAS	UNIV-HOSP-MAS	Hospital	Hospital	0	0	0	0	0	0	0	1	0	0	1	0	0	0	0	0	0	0	0	0	0	0	0	0	Article
46974992	Treatment of suicidal people around the world	BRITISH JOURNAL OF PSYCHIATRY	27	27	Green OA article	Green OA	1	Bruffaerts-R	Bruffaerts	R.	Author, Reprint Author	1	UPC-KUL	UPC-KUL (UNIV-HOSP)	UPC-KUL (UNIV-HOSP)	Hospital	Hospital	0	0	0	0	0	1	0	0	0	0	1	0	0	0	0	0	0	0	0	0	0	0	0	0	Article
46977624	Injury mortality indicators: recommendations from the International Collaborative Effort on Injury Statistics	INJURY PREVENTION	3	3	Green OA article	Green OA	1	Cryer-C	Cryer	Colin	Author	2	UNIV-OTAGO	UNIV-OTAGO	UNIV-OTAGO	University	University - Rank 201-500	0	0	0	0	0	1	0	0	0	0	0	0	0	0	0	0	0	0	1	0	0	1	0	0	Article
46989619	The Global Burden of Childhood Coeliac Disease: A Neglected Component of Diarrhoeal Mortality?	PLOS ONE	3	2	Gold OA article (APC)	Gold OA	1	Byass-P	Byass	Peter	Author, Reprint Author	1	UMEA-UNIV	UMEA-UNIV	UMEA-UNIV	University	University - Rank 201-500	0	1495	0	1	0	0	0	0	0	0	0	0	0	0	0	0	0	0	1	0	0	1	0	1	Article
46992081	Mental health of the world population: epidemiological aspects (the analysis of foreign research results for 2000-2010)	ZHURNAL NEVROLOGII I PSIKHIATRII IMENI S S KORSAKOVA	4	2	Toll access article	Toll access	1	Mitikhina-IA	Mitikhina	I. A.	Author, Reprint Author	1	RUSSIAN-ACAD-MED-SCI	RUSSIAN-ACAD-SCI	RUSSIAN-ACAD-SCI	University	University: Unranked	1	0	0	0	0	0	0	1	0	0	0	0	0	0	0	0	0	0	0	0	1	1	0	0	Article
47008627	Hepatitis A Infection in Recent International Adoptees and Their Contacts in Minnesota, 2007-2009	PEDIATRICS	4	1	Delayed OA article	Delayed OA	1	Sweet-K	Sweet	Kristin	Author, Reprint Author	1	MINNESOTA-DEPT-HLTH	MINNESOTA-DEPT-HLTH	MINNESOTA-DEPT-HLTH	Government	Government	0	0	1	0	0	0	0	0	0	1	0	0	0	0	0	0	0	0	0	0	0	0	0	0	Article
47008985	Ticagrelor Compared With Clopidogrel by Geographic Region in the Platelet Inhibition and Patient Outcomes (PLATO) Trial	CIRCULATION	13	6	Hybrid article	Hybrid	1	Mahaffey-KW	Mahaffey	Kenneth W.	Author, Reprint Author	1	DUKE-CLIN-RES-INST	DUKE-UNIV	DUKE-UNIV	University	University - Rank 001-025	0	4600	0	0	0	0	1	0	0	0	0	0	0	0	1	0	0	0	0	0	0	1	1	1	Article
47022899	IAGG Workshop: Health promotion program on prevention of late onset dementia	JOURNAL OF NUTRITION HEALTH & AGING	28	35	Green OA article	Green OA	1	Andrieu-S	Andrieu	S.	Author, Reprint Author	1	UNIV-TOULOUSE-3	FED-UNIV-TOULOUSE	FED-UNIV-TOULOUSE	University	University - Rank 201-500	0	0	0	0	0	1	0	0	0	0	0	0	0	0	0	0	0	0	1	0	0	1	0	0	Article
47031554	The Measles Initiative: Moving Toward Measles Eradication	JOURNAL OF INFECTIOUS DISEASES	2	2	Hybrid article	Hybrid	1	Christie-AS	Christie	Athalia S.	Author, Reprint Author	1	AMER-RED-CROSS	AMER-RED-CROSS	AMER-RED-CROSS	Non-profit	Non-profit	0	3500	0	0	0	0	1	0	0	0	0	1	0	0	0	0	0	0	0	0	0	0	0	1	Article
47031556	Progress Toward Control of Rubella and Prevention of Congenital Rubella Syndrome-Worldwide, 2009	JOURNAL OF INFECTIOUS DISEASES	5	2	Hybrid article	Hybrid	1	Reef-SE	Reef	S. E.	Author, Reprint Author	1	CTR-DIS-CONTROL-&-PREVENT	CDC	CDC	Government	Government	0	3500	0	0	0	0	1	0	0	1	0	0	0	0	0	0	0	0	0	0	0	0	0	1	Article
47031585	The Americas: Paving the Road Toward Global Measles Eradication	JOURNAL OF INFECTIOUS DISEASES	6	2	Hybrid article	Hybrid	1	CastilloSolorzano-CC	Carlos Castillo-Solorzano	C.	Author, Reprint Author	1	PAN-AMER-HLTH-ORG	PAN-AMER-HLTH-ORG	PAN-AMER-HLTH-ORG	Non-profit	Non-profit	0	3500	0	0	0	0	1	0	0	0	0	1	0	0	0	0	0	0	0	0	0	0	0	1	Article
47031614	Expansion of the Global Measles and Rubella Laboratory Network 2005-09	JOURNAL OF INFECTIOUS DISEASES	17	12	Hybrid article	Hybrid	1	Featherstone-DA	Featherstone	David A.	Author, Reprint Author	1	WHO	WHO	WHO	Non-profit	Non-profit	0	3500	0	0	0	0	1	0	0	0	0	1	0	0	0	0	0	0	0	0	0	0	0	1	Article
47031615	Evaluation of the World Health Organization Global Measles and Rubella Quality Assurance Program, 2001-2008	JOURNAL OF INFECTIOUS DISEASES	7	2	Hybrid article	Hybrid	1	Stambos-V	Stambos	Vicki	Author, Reprint Author	1	VICTORIAN-INFECT-DIS-REFERENCE-LAB	VICTORIAN-INFECT-DIS-REFERENCE-LAB	VICTORIAN-INFECT-DIS-REFERENCE-LAB	Research institute	Research Institute	0	3500	0	0	0	0	1	0	0	0	0	0	1	0	0	0	0	0	0	0	0	0	0	1	Article
47031616	Improving Global Virologic Surveillance for Measles and Rubella	JOURNAL OF INFECTIOUS DISEASES	11	5	Hybrid article	Hybrid	1	Rota-PA	Rota	Paul A.	Author, Reprint Author	1	CTR-DIS-CONTROL-&-PREVENT	CDC	CDC	Government	Government	0	3500	0	0	0	0	1	0	0	1	0	0	0	0	0	0	0	0	0	0	0	0	0	1	Article
47031617	Global Distribution of Measles Genotypes and Measles Molecular Epidemiology	JOURNAL OF INFECTIOUS DISEASES	34	25	Hybrid article	Hybrid	1	Rota-PA	Rota	Paul A.	Author, Reprint Author	1	WORLD-HLTH-ORG-WHO-GLOBAL-SPECIALIZED-LAB	WHO	WHO	Non-profit	Non-profit	0	3500	0	0	0	0	1	0	0	0	0	1	0	0	0	0	0	0	0	0	0	0	0	1	Article
47031618	Status of Global Virologic Surveillance for Rubella Viruses	JOURNAL OF INFECTIOUS DISEASES	27	19	Hybrid article	Hybrid	1	Abernathy-ES	Abernathy	Emily S.	Author	1	CTR-DIS-CONTROL-&-PREVENT	CDC	CDC	Government	Government	0	3500	0	0	0	0	1	0	0	1	0	0	0	0	0	0	0	0	0	0	0	0	0	1	Article
47037522	UN High-Level Meeting on Non-Communicable Diseases: addressing four questions	LANCET	13	11	Toll access article	Toll access	1	Beaglehole-R	Beaglehole	Robert	Author, Reprint Author	1	UNIV-AUCKLAND	UNIV-AUCKLAND	UNIV-AUCKLAND	University	University - Rank 101-200	0	0	0	0	0	0	0	1	0	0	0	0	0	0	0	0	0	1	0	0	0	1	0	0	Article
47037866	Type 2 diabetes incidence and socio-economic position: a systematic review and meta-analysis	INTERNATIONAL JOURNAL OF EPIDEMIOLOGY	5	5	Hybrid article	Hybrid	1	Agardh-E	Agardh	Emilie	Author, Reprint Author	1	KAROLINSKA-INST	KAROLINSKA-INST	KAROLINSKA-INST	University	University - Rank 026-050	0	3200	0	0	0	0	1	0	0	0	0	0	0	0	0	1	0	0	0	0	0	1	1	1	Review
47062791	Raising the Profile of Participatory Action Research at the 2010 Global Symposium on Health Systems Research	MEDICC REVIEW	8	6	Gold OA article (non-APC)	Gold OA	1	Loewenson-R	Loewenson	Rene	Author, Reprint Author	1	EQUINET	EQUINET	EQUINET	Company	Company	0	0	0	0	1	0	0	0	1	0	0	0	0	0	0	0	0	0	0	0	0	0	0	0	Article
47069883	International Emergency Medicine: A Review of the Literature From 2010	ACADEMIC EMERGENCY MEDICINE	7	7	Hybrid article	Hybrid	1	Aschkenasy-M	Aschkenasy	Miriam	Author, Reprint Author	1	CAMBRIDGE-HOSP	CAMBRIDGE-HOSP	CAMBRIDGE-HOSP	Hospital	Hospital	0	3000	0	0	0	0	1	0	0	0	1	0	0	0	0	0	0	0	0	0	0	0	0	1	Review
47081065	Worldwide prevalence of physical inactivity and its association with human development index in 76 countries	PREVENTIVE MEDICINE	4	7	Toll access article	Toll access	1	Dumith-SC	Dumith	Samuel C.	Author, Reprint Author	1	UNIV-FED-PELOTAS	UNIV-FED-PELOTAS	UNIV-FED-PELOTAS	University	University: Unranked	0	0	0	0	0	0	0	1	0	0	0	0	0	0	0	0	0	0	0	0	1	1	0	0	Article
47081520	Influence of Global Region on Outcomes in Heart Failure Beta-Blocker Trials	JOURNAL OF THE AMERICAN COLLEGE OF CARDIOLOGY	9	7	Hybrid article	Hybrid	1	OConnor-CM	O'Connor	Christopher M.	Author, Reprint Author	1	DUKE-UNIV	DUKE-UNIV	DUKE-UNIV	University	University - Rank 001-025	0	3000	0	0	0	0	1	0	0	0	0	0	0	0	1	0	0	0	0	0	0	1	1	1	Article
47087302	Chronic and non-communicable diseases: a critical challenge for nurses globally	INTERNATIONAL NURSING REVIEW	3	2	Toll access article	Toll access	1	Alleyne-G	Alleyne	G.	Author	2	PAN-AMER-HLTH-ORG	PAN-AMER-HLTH-ORG	PAN-AMER-HLTH-ORG	Non-profit	Non-profit	0	0	0	0	0	0	0	1	0	0	0	1	0	0	0	0	0	0	0	0	0	0	0	0	Article
47090220	The worldwide impact of vaccination on the control and protection of viral hepatitis B	DIGESTIVE AND LIVER DISEASE	4	2	Toll access article	Toll access	1	Romano-L	Romano	Luisa	Author	1	UNIV-MILAN	UNIV-MILAN	UNIV-MILAN	University	University - Rank 201-500	0	0	0	0	0	0	0	1	0	0	0	0	0	0	0	0	0	0	1	0	0	1	0	0	Article
47097557	The role of non-governmental organizations in global health diplomacy: negotiating the Framework Convention on Tobacco Control	HEALTH POLICY AND PLANNING	3	3	Hybrid article	Hybrid	1	Lencucha-R	Lencucha	Raphael	Author, Reprint Author	1	UNIV-LETHBRIDGE	UNIV-LETHBRIDGE	UNIV-LETHBRIDGE	University	University: Unranked	0	2400	0	0	0	0	1	0	0	0	0	0	0	0	0	0	0	0	0	0	1	1	0	1	Article
47098623	New Decade of Vaccines 5 Addressing the vaccine confidence gap	LANCET	5	5	Toll access article	Toll access	1	Larson-HJ	Larson	Heidi J.	Author, Reprint Author	1	UNIV-LONDON-LONDON-SCH-HYG-&-TROP-MED	UNIV-LONDON-LONDON-SCH-HYG-&-TROP-MED	UNIV-LONDON-LONDON-SCH-HYG-&-TROP-MED	University	University - Rank 001-025	0	0	0	0	0	0	0	1	0	0	0	0	0	0	1	0	0	0	0	0	0	1	1	0	Article
47125709	Career Development Needs Assessment in Cancer Prevention and Control: Focus on Research in Minority and International Settings	JOURNAL OF CANCER EDUCATION	5	3	Green OA article	Green OA	1	Soliman-AS	Soliman	Amr S.	Author, Reprint Author	1	UNIV-MICHIGAN	UNIV-MICHIGAN	UNIV-MICHIGAN	University	University - Rank 001-025	0	0	0	0	0	1	0	0	0	0	0	0	0	0	1	0	0	0	0	0	0	1	1	0	Article
47151609	Developing a curriculum framework for global health in family medicine: emerging principles, competencies, and educational approaches	BMC MEDICAL EDUCATION	11	8	Gold OA article (APC)	Gold OA	1	RedwoodCampbell-L	Redwood-Campbell	Lynda	Author, Reprint Author	1	MCMASTER-UNIV	MCMASTER-UNIV	MCMASTER-UNIV	University	University - Rank 101-200	0	2145	0	1	0	0	0	0	0	0	0	0	0	0	0	0	0	1	0	0	0	1	0	1	Article
47157126	2010: The year in review, Part I	INTERNATIONAL JOURNAL OF TUBERCULOSIS AND LUNG DISEASE	3	3	Green OA article	Green OA	1	Lalloo-UG	Lalloo	U. G.	Author, Reprint Author	1	UNIV-KWAZULU-NATAL	UNIV-KWAZULU-NATAL	UNIV-KWAZULU-NATAL	University	University - Rank 501+	0	0	0	0	0	1	0	0	0	0	0	0	0	0	0	0	0	0	0	1	0	1	0	0	Review
47161021	Vaccines and global health	PHILOSOPHICAL TRANSACTIONS OF THE ROYAL SOCIETY B-BIOLOGICAL SCIENCES	3	3	Green OA article	Green OA	1	Greenwood-B	Greenwood	Brian	Author, Reprint Author	1	LONDON-SCH-HYG-&-TROP-MED	UCL	UCL	University	University - Rank 001-025	0	0	0	0	0	1	0	0	0	0	0	0	0	0	1	0	0	0	0	0	0	1	1	0	Article
47161903	Global Public-Private Health Partnerships: lessons learned from ten years of experience and evaluation	INTERNATIONAL DENTAL JOURNAL	2	1	Green OA article	Green OA	1	Buse-K	Buse	Kent	Author, Reprint Author	1	UNAIDS	UNAIDS	UNAIDS	Non-profit	Non-profit	0	0	0	0	0	1	0	0	0	0	0	1	0	0	0	0	0	0	0	0	0	0	0	0	Article
47163424	Creating and Using New Data Sources to Analyze the Relationship Between Social Policy and Global Health: The Case of Maternal Leave	PUBLIC HEALTH REPORTS	3	2	Green OA article	Green OA	1	Heymann-J	Heymann	Jody	Author, Reprint Author	1	MCGILL-UNIV	MCGILL-UNIV	MCGILL-UNIV	University	University - Rank 026-050	0	0	0	0	0	1	0	0	0	0	0	0	0	0	0	1	0	0	0	0	0	1	1	0	Article
47164654	Impact of Global Health Residency Training on Medical Knowledge of Immigrant Health	AMERICAN JOURNAL OF TROPICAL MEDICINE AND HYGIENE	6	4	Green OA article	Green OA	1	Bjorklund-AB	Bjorklund	Ashley Balsam	Author	1	UNIV-MINNESOTA	UNIV-MINNESOTA	UNIV-MINNESOTA	University	University - Rank 051-100	0	0	0	0	0	1	0	0	0	0	0	0	0	0	0	0	1	0	0	0	0	1	0	0	Article
47167688	World Federation of Pediatric Intensive Care and Critical Care Societies: Global Sepsis Initiative	PEDIATRIC CRITICAL CARE MEDICINE	9	8	Toll access article	Toll access	1	Kissoon-N	Kissoon	Niranjan	Author, Reprint Author	1	BRITISH-COLUMBIA-CHILDRENS-HOSP	BRITISH-COLUMBIA-CHILDRENS-HOSP	BRITISH-COLUMBIA-CHILDRENS-HOSP	Hospital	Hospital	0	0	0	0	0	0	0	1	0	0	1	0	0	0	0	0	0	0	0	0	0	0	0	0	Article
47168869	Global Cardiovascular Health	JOURNAL OF THE AMERICAN COLLEGE OF CARDIOLOGY	3	3	Hybrid article	Hybrid	1	Fuster-V	Fuster	Valentin	Author, Reprint Author	1	MT-SINAI-MED-CTR	MT-SINAI-MED-CTR	MT-SINAI-MED-CTR	Hospital	Hospital	0	3000	0	0	0	0	1	0	0	0	1	0	0	0	0	0	0	0	0	0	0	0	0	1	Article
47186339	Designing the Next Generation of Vaccines for Global Public Health	OMICS-A JOURNAL OF INTEGRATIVE BIOLOGY	9	1	Toll access article	Toll access	1	Bagnoli-F	Bagnoli	Fabio	Author, Reprint Author	1	NOVARTIS-VACCINES-&-DIAGNOST	NOVARTIS-VACCINES-&-DIAGNOST	NOVARTIS-VACCINES-&-DIAGNOST	Company	Company	0	0	0	0	0	0	0	1	1	0	0	0	0	0	0	0	0	0	0	0	0	0	0	0	Review
47186341	Therapeutic Cancer Vaccines and Translating Vaccinomics Science to the Global Health Clinic: Emerging Applications Toward Proof of Concept	OMICS-A JOURNAL OF INTEGRATIVE BIOLOGY	2	1	Green OA article	Green OA	1	OMeara-MM	O'Meara	Megan M.	Author	1	UNIV-WASHINGTON	UNIV-WASHINGTON	UNIV-WASHINGTON	University	University - Rank 026-050	0	0	0	0	0	1	0	0	0	0	0	0	0	0	0	1	0	0	0	0	0	1	1	0	Review
47193094	Maternal mortality and Millennium Development Goal 5	BRITISH MEDICAL BULLETIN	2	2	Toll access article	Toll access	1	vandenBroek-NR	van den Broek	N. R.	Author, Reprint Author	1	UNIV-LIVERPOOL	UNIV-LIVERPOOL	UNIV-LIVERPOOL	University	University - Rank 101-200	0	0	0	0	0	0	0	1	0	0	0	0	0	0	0	0	0	1	0	0	0	1	0	0	Article
47197281	What Can a UN Health Summit Do?	SCIENCE TRANSLATIONAL MEDICINE	2	1	Delayed OA article	Delayed OA	1	Nugent-RA	Nugent	Rachel A.	Author, Reprint Author	1	UNIV-WASHINGTON	UNIV-WASHINGTON	UNIV-WASHINGTON	University	University - Rank 026-050	0	0	1	0	0	0	0	0	0	0	0	0	0	0	0	1	0	0	0	0	0	1	1	0	Article
47225605	Spatial epidemiology and spatial ecology study of worldwide drug-resistant tuberculosis	INTERNATIONAL JOURNAL OF HEALTH GEOGRAPHICS	8	2	Gold OA article (APC)	Gold OA	1	Liu-YX	Liu	Yunxia	Author	1	SHANDONG-UNIV	SHANDONG-UNIV	SHANDONG-UNIV	University	University: Unranked	0	2145	0	1	0	0	0	0	0	0	0	0	0	0	0	0	0	0	0	0	1	1	0	1	Article
47226697	The World Organisation for Animal Health and epidemiological modelling: background and objectives	REVUE SCIENTIFIQUE ET TECHNIQUE DE L OFFICE INTERNATIONAL DES EPIZOOTIES	5	5	Toll access article	Toll access	1	Willeberg-P	Willeberg	P.	Author, Reprint Author	1	UNIV-CALIF-DAVIS	UNIV-CALIF-DAVIS	UNIV-CALIF-DAVIS	University	University - Rank 051-100	0	0	0	0	0	0	0	1	0	0	0	0	0	0	0	0	1	0	0	0	0	1	0	0	Article
47229087	Worldwide vitamin D status	BEST PRACTICE & RESEARCH CLINICAL ENDOCRINOLOGY & METABOLISM	2	2	Toll access article	Toll access	1	vanSchoor-NM	van Schoor	Natasja M.	Author, Reprint Author	1	VRIJE-UNIV-AMSTERDAM-MED-CTR	VRIJE-UNIV-AMSTERDAM	VRIJE-UNIV-AMSTERDAM-MED-CTR	Hospital	Hospital	0	0	0	0	0	0	0	1	0	0	1	0	0	0	0	0	0	0	0	0	0	0	0	0	Article
47230395	Integrating Cancer Control into Global Health	SCIENCE TRANSLATIONAL MEDICINE	2	1	Delayed OA article	Delayed OA	1	Varmus-H	Varmus	Harold	Author, Reprint Author	1	NCI	NCI	NCI	Government	Government	0	0	1	0	0	0	0	0	0	1	0	0	0	0	0	0	0	0	0	0	0	0	0	0	Article
47238568	From Treating Complex Coronary Artery Disease to Promoting Cardiovascular Health: Therapeutic Transitions and Challenges, 2010-2020	CLINICAL PHARMACOLOGY & THERAPEUTICS	2	3	Toll access article	Toll access	1	Kovacic-JC	Kovacic	J. C.	Author	1	MT-SINAI-SCH-MED	MT-SINAI-MED-CTR	MT-SINAI-MED-CTR	Hospital	Hospital	0	0	0	0	0	0	0	1	0	0	1	0	0	0	0	0	0	0	0	0	0	0	0	0	Article
47238569	Pharmacogenomics: Application to the Management of Cardiovascular Disease	CLINICAL PHARMACOLOGY & THERAPEUTICS	6	9	Green OA article	Green OA	1	Johnson-JA	Johnson	J. A.	Author, Reprint Author	1	UNIV-FLORIDA	UNIV-FLORIDA	UNIV-FLORIDA	University	University - Rank 101-200	0	0	0	0	0	1	0	0	0	0	0	0	0	0	0	0	0	1	0	0	0	1	0	0	Article
47238583	Optimizing Revascularization Strategies in Coronary Artery Disease for Optimal Benefit to Patients	CLINICAL PHARMACOLOGY & THERAPEUTICS	4	2	Toll access article	Toll access	1	Mangiacapra-F	Mangiacapra	F.	Author	1	ONZE-LIEVE-VROUW-HOSP	ONZE-LIEVE-VROUW-HOSP	ONZE-LIEVE-VROUW-HOSP	Hospital	Hospital	0	0	0	0	0	0	0	1	0	0	1	0	0	0	0	0	0	0	0	0	0	0	0	0	Article
47246658	EARLY REPORTING OF PANDEMIC FLU AND THE CHALLENGE OF GLOBAL SURVEILLANCE: A LESSON FOR SOUTHEAST ASIA	SOUTHEAST ASIAN JOURNAL OF TROPICAL MEDICINE AND PUBLIC HEALTH	2	2	Green OA article	Green OA	1	Hanvoravongchai-P	Hanvoravongchai	Piya	Author, Reprint Author	1	CHULALONGKORN-UNIV	CHULALONGKORN-UNIV	CHULALONGKORN-UNIV	University	University - Rank 501+	0	0	0	0	0	1	0	0	0	0	0	0	0	0	0	0	0	0	0	1	0	1	0	0	Article
47246663	ACCELERATING THE DEVELOPMENT OF AN AIDS VACCINE: THE AIDS VACCINE FOR ASIA NETWORK (AVAN)	SOUTHEAST ASIAN JOURNAL OF TROPICAL MEDICINE AND PUBLIC HEALTH	18	14	Green OA article	Green OA	1	Pitisuttithum-P	Pitisuttithum	Punnee	Author, Reprint Author	1	MAHIDOL-UNIV	MAHIDOL-UNIV	MAHIDOL-UNIV	University	University - Rank 501+	0	0	0	0	0	1	0	0	0	0	0	0	0	0	0	0	0	0	0	1	0	1	0	0	Article
47258108	Translating tuberculosis research into global policies: the example of an international collaboration on diagnostics	INTERNATIONAL JOURNAL OF TUBERCULOSIS AND LUNG DISEASE	4	3	Green OA article	Green OA	1	Ramsay-A	Ramsay	A.	Author, Reprint Author	1	WORLD-HLTH-ORG	WHO	WHO	Non-profit	Non-profit	0	0	0	0	0	1	0	0	0	0	0	1	0	0	0	0	0	0	0	0	0	0	0	0	Review
47258544	Moving beyond behaviour: Advancing HIV risk prevention epistemologies and interventions (A report on the state of the literature)	GLOBAL PUBLIC HEALTH	2	2	Toll access article	Toll access	1	Phillips-AF	Phillips	Alton F.	Author, Reprint Author	1	NYU	NYU	NYU	University	University - Rank 026-050	0	0	0	0	0	0	0	1	0	0	0	0	0	0	0	1	0	0	0	0	0	1	1	0	Article
47271181	A prospective study on neonatal mortality and its predictors in a rural area in Burkina Faso: Can MDG-4 be met by 2015?	JOURNAL OF PERINATOLOGY	5	3	Green OA article	Green OA	1	Diallo-AH	Diallo	A. H.	Author, Reprint Author	1	MINIST-HLTH-BURKINA-FASO	MINIST-HLTH-BURKINA-FASO	MINIST-HLTH-BURKINA-FASO	Government	Government	0	0	0	0	0	1	0	0	0	1	0	0	0	0	0	0	0	0	0	0	0	0	0	0	Article
47277469	Global Health Education for Pediatric Residents: A National Survey	PEDIATRICS	7	6	Delayed OA article	Delayed OA	1	Anspacher-M	Anspacher	Melanie	Author, Reprint Author	1	CHILDRENS-NATL-MED-CTR	CHILDRENS-NATL-MED-CTR	CHILDRENS-NATL-MED-CTR	Hospital	Hospital	0	0	1	0	0	0	0	0	0	0	1	0	0	0	0	0	0	0	0	0	0	0	0	0	Article
47278216	Management of atrial fibrillation around the world: a comparison of current ACCF/AHA/HRS, CCS, and ESC guidelines	EUROPACE	2	1	Hybrid article	Hybrid	1	Wasmer-K	Wasmer	Kristina	Author, Reprint Author	1	HOSP-WESTFAL-WILHELMS-UNIV	HOSP-WESTFAL-WILHELMS-UNIV	HOSP-WESTFAL-WILHELMS-UNIV	Hospital	Hospital	0	3500	0	0	0	0	1	0	0	0	1	0	0	0	0	0	0	0	0	0	0	0	0	1	Review
47288729	The University of California Global Health Institute Opportunities and Challenges	INFECTIOUS DISEASE CLINICS OF NORTH AMERICA	2	2	Green OA article	Green OA	1	Debas-HT	Debas	Haile T.	Author, Reprint Author	1	UNIV-CALIF-SAN-FRANCISCO	UCSF	UCSF	University	University - Rank 001-025	0	0	0	0	0	1	0	0	0	0	0	0	0	0	1	0	0	0	0	0	0	1	1	0	Article
47288730	Global Health: The Fogarty International Center, National Institutes of Health: Vision and Mission, Programs, and Accomplishments	INFECTIOUS DISEASE CLINICS OF NORTH AMERICA	4	1	Green OA article	Green OA	1	Breman-JG	Breman	Joel G.	Author, Reprint Author	1	NIH	NIH	NIH	Government	Government	0	0	0	0	0	1	0	0	0	1	0	0	0	0	0	0	0	0	0	0	0	0	0	0	Article
47288732	Global Health in the UK Government and University Sector	INFECTIOUS DISEASE CLINICS OF NORTH AMERICA	3	1	Green OA article	Green OA	1	Coltart-CEM	Coltart	Cordelia E. M.	Author	1	ROYAL-COLL-PHYSICIANS	ROYAL-COLL-PHYSICIANS	ROYAL-COLL-PHYSICIANS	Scientific association	Scientific association	0	0	0	0	0	1	0	0	0	0	0	0	0	1	0	0	0	0	0	0	0	0	0	0	Article
47288733	Competencies for Global Heath Graduate Education	INFECTIOUS DISEASE CLINICS OF NORTH AMERICA	3	3	Green OA article	Green OA	1	Calhoun-JG	Calhoun	Judith G.	Author, Reprint Author	1	UNIV-MICHIGAN	UNIV-MICHIGAN	UNIV-MICHIGAN	University	University - Rank 001-025	0	0	0	0	0	1	0	0	0	0	0	0	0	0	1	0	0	0	0	0	0	1	1	0	Article
47288735	Global Health Diplomacy and Peace	INFECTIOUS DISEASE CLINICS OF NORTH AMERICA	2	2	Green OA article	Green OA	1	Kickbusch-I	Kickbusch	Ilona	Author, Reprint Author	1	GRAD-INST-INT-&-DEV-STUDIES	GRAD-INST-INT-&-DEV-STUDIES	GRAD-INST-INT-&-DEV-STUDIES	Research institute	Research Institute	0	0	0	0	0	1	0	0	0	0	0	0	1	0	0	0	0	0	0	0	0	0	0	0	Article
47288736	Poverty, Global Health, and Infectious Disease: Lessons from Haiti and Rwanda	INFECTIOUS DISEASE CLINICS OF NORTH AMERICA	5	2	Green OA article	Green OA	1	Alsan-MM	Alsan	Marcella M.	Author, Reprint Author	1	HARVARD-UNIV	HARVARD-UNIV	HARVARD-UNIV	University	University - Rank 001-025	0	0	0	0	0	1	0	0	0	0	0	0	0	0	1	0	0	0	0	0	0	1	1	0	Article
47288737	Global Health: Chronic Diseases and Other Emergent Issues in Global Health	INFECTIOUS DISEASE CLINICS OF NORTH AMERICA	3	1	Green OA article	Green OA	1	Koehlmoos-TP	Koehlmoos	Tracey Perez	Author, Reprint Author	1	INT-CTR-DIARRHOEAL-DIS-RES	INT-CTR-DIARRHOEAL-DIS-RES	INT-CTR-DIARRHOEAL-DIS-RES	Non-profit	Non-profit	0	0	0	0	0	1	0	0	0	0	0	1	0	0	0	0	0	0	0	0	0	0	0	0	Article
47288739	Global Health: Injuries and Violence	INFECTIOUS DISEASE CLINICS OF NORTH AMERICA	4	3	Green OA article	Green OA	1	Herbert-HK	Herbert	Hadley K.	Author	1	JOHNS-HOPKINS-UNIV	JOHNS-HOPKINS-UNIV	JOHNS-HOPKINS-UNIV	University	University - Rank 001-025	0	0	0	0	0	1	0	0	0	0	0	0	0	0	1	0	0	0	0	0	0	1	1	0	Article
47288741	Global Laboratory Systems Development: Needs and Approaches	INFECTIOUS DISEASE CLINICS OF NORTH AMERICA	2	2	Green OA article	Green OA	1	Martin-R	Martin	Robert	Author, Reprint Author	1	UNIV-WASHINGTON	UNIV-WASHINGTON	UNIV-WASHINGTON	University	University - Rank 026-050	0	0	0	0	0	1	0	0	0	0	0	0	0	0	0	1	0	0	0	0	0	1	1	0	Article
47288742	Drugs and Diagnostic Innovations to Improve Global Health	INFECTIOUS DISEASE CLINICS OF NORTH AMERICA	2	2	Green OA article	Green OA	1	Peeling-RW	Peeling	Rosanna W.	Author, Reprint Author	1	LONDON-SCH-HYG-&-TROP-MED	UCL	UCL	University	University - Rank 001-025	0	0	0	0	0	1	0	0	0	0	0	0	0	0	1	0	0	0	0	0	0	1	1	0	Article
47304735	Progress towards Millennium Development Goals 4 and 5 on maternal and child mortality: an updated systematic analysis	LANCET	12	2	Toll access article	Toll access	1	Lozano-R	Lozano	Rafael	Author, Reprint Author	1	UNIV-WASHINGTON	UNIV-WASHINGTON	UNIV-WASHINGTON	University	University - Rank 026-050	0	0	0	0	0	0	0	1	0	0	0	0	0	0	0	1	0	0	0	0	0	1	1	0	Article
47311073	Postgraduate training in global health: ensuring UK doctors can contribute to health in resource-poor countries	CLINICAL MEDICINE	4	3	Toll access article	Toll access	1	Brown-C	Brown	Colin	Author, Reprint Author	1	ST-THOMAS-HOSP	ST-THOMAS-HOSP	ST-THOMAS-HOSP	Hospital	Hospital	0	0	0	0	0	0	0	1	0	0	1	0	0	0	0	0	0	0	0	0	0	0	0	0	Article
47318100	Global mesothelioma deaths reported to the World Health Organization between 1994 and 2008	BULLETIN OF THE WORLD HEALTH ORGANIZATION	6	2	Gold OA article (non-APC)	Gold OA	1	Delgermaa-V	Delgermaa	Vanya	Author	1	UNIV-OCCUPAT-&-ENVIRONM-HLTH	UNIV-OCCUPAT-&-ENVIRONM-HLTH	UNIV-OCCUPAT-&-ENVIRONM-HLTH	University	University: Unranked	0	0	0	0	1	0	0	0	0	0	0	0	0	0	0	0	0	0	0	0	1	1	0	0	Article
47318104	Preoperative visual acuity among cataract surgery patients and countries' state of development: a global study	BULLETIN OF THE WORLD HEALTH ORGANIZATION	5	2	Gold OA article (non-APC)	Gold OA	1	Shah-SP	Shah	Shaheen P.	Author, Reprint Author	1	LONDON-SCH-HYG-&-TROP-MED	UCL	UCL	University	University - Rank 001-025	0	0	0	0	1	0	0	0	0	0	0	0	0	0	1	0	0	0	0	0	0	1	1	0	Article
47318106	Estimated global incidence of Japanese encephalitis: a systematic review	BULLETIN OF THE WORLD HEALTH ORGANIZATION	11	9	Gold OA article (non-APC)	Gold OA	1	Campbell-GL	Campbell	Grant L.	Author	2	ROSS-RIVER-CONSULTING	ROSS-RIVER-CONSULTING	ROSS-RIVER-CONSULTING	Company	Company	0	0	0	0	1	0	0	0	1	0	0	0	0	0	0	0	0	0	0	0	0	0	0	0	Review
47319956	Excess weight and economic, political, and social factors: an international ecological analysis	CADERNOS DE SAUDE PUBLICA	5	3	Gold OA article (non-APC)	Gold OA	1	GonzalezZapata-LI	Ines Gonzalez-Zapata	Laura	Author, Reprint Author	1	UNIV-ANTIOQUIA	UNIV-ANTIOQUIA	UNIV-ANTIOQUIA	University	University - Rank 501+	0	0	0	0	1	0	0	0	0	0	0	0	0	0	0	0	0	0	0	1	0	1	0	0	Article
47355920	Identifying important breast cancer control strategies in Asia, Latin America and the Middle East/North Africa	BMC HEALTH SERVICES RESEARCH	7	7	Gold OA article (APC)	Gold OA	1	Bridges-JFP	Bridges	John F. P.	Author, Reprint Author	1	JOHNS-HOPKINS-BLOOMBERG-SCH-PUBL-HLTH	JOHNS-HOPKINS-UNIV	JOHNS-HOPKINS-UNIV	University	University - Rank 001-025	0	2145	0	1	0	0	0	0	0	0	0	0	0	0	1	0	0	0	0	0	0	1	1	1	Article
47360741	FEDERALISM AND DECENTRALIZATION: IMPACT ON INTERNATIONAL AND BRAZILIAN HEALTH POLICIES	INTERNATIONAL JOURNAL OF HEALTH SERVICES	3	4	Toll access article	Toll access	1	Leite-VR	Leite	Valeria Rodrigues	Author, Reprint Author	1	UNIV-FED-RIO-GRANDE-DO-NORTE	UNIV-FED-RIO-GRANDE-DO-NORTE	UNIV-FED-RIO-GRANDE-DO-NORTE	University	University - Rank 501+	0	0	0	0	0	0	0	1	0	0	0	0	0	0	0	0	0	0	0	1	0	1	0	0	Article
47363339	Future Infectious Disease Threats to Europe	AMERICAN JOURNAL OF PUBLIC HEALTH	2	1	Green OA article	Green OA	1	Suk-JE	Suk	Jonathan E.	Author	1	EUROPEAN-CTR-DIS-PREVENT-&-CONTROL	EUROPEAN-CTR-DIS-PREVENT-&-CONTROL	EUROPEAN-CTR-DIS-PREVENT-&-CONTROL	Government	Government	0	0	0	0	0	1	0	0	0	1	0	0	0	0	0	0	0	0	0	0	0	0	0	0	Article
47363349	Contribution of Obesity to International Differences in Life Expectancy	AMERICAN JOURNAL OF PUBLIC HEALTH	2	1	Green OA article	Green OA	1	Preston-SH	Preston	Samuel H.	Author, Reprint Author	1	UNIV-PENN	UNIV-PENN	UNIV-PENN	University	University - Rank 001-025	0	0	0	0	0	1	0	0	0	0	0	0	0	0	1	0	0	0	0	0	0	1	1	0	Article
47369169	Epidemiology of burns throughout the world. Part I: Distribution and risk factors	BURNS	1	3	Toll access article	Toll access	1	Peck-MD	Peck	Michael D.	Author, Reprint Author	1	MARICOPA-CTY-GEN-HOSP	MARICOPA-CTY-GEN-HOSP	MARICOPA-CTY-GEN-HOSP	Hospital	Hospital	1	0	0	0	0	0	0	1	0	0	1	0	0	0	0	0	0	0	0	0	0	0	0	0	Review
47380953	The looming epidemic of diabetes-associated tuberculosis: learning lessons from HIV-associated tuberculosis	INTERNATIONAL JOURNAL OF TUBERCULOSIS AND LUNG DISEASE	16	14	Green OA article	Green OA	1	Harries-AD	Harries	A. D.	Author, Reprint Author	1	INT-UNION-TB-&-LUNG-DIS	INT-UNION-AGAINST-TUBERCULOSIS-&-LUNG-DIS-UNION	INT-UNION-AGAINST-TUBERCULOSIS-&-LUNG-DIS-UNION	Research institute	Research Institute	0	0	0	0	0	1	0	0	0	0	0	0	1	0	0	0	0	0	0	0	0	0	0	0	Review
47383962	Considerations for the Safe and Effective Use of Iron Interventions in Areas of Malaria Burden - Executive Summary	INTERNATIONAL JOURNAL FOR VITAMIN AND NUTRITION RESEARCH	3	2	Toll access article	Toll access	1	Raiten-DJ	Raiten	Daniel J.	Author, Reprint Author	1	EUNICE-KENNEDY-SHRIVER-NATL-INST-CHILD-HLTH-&-HUM	NIH	NIH	Government	Government	0	0	0	0	0	0	0	1	0	1	0	0	0	0	0	0	0	0	0	0	0	0	0	0	Article
47399270	Global Mental Health 2 Child and adolescent mental health worldwide: evidence for action	LANCET	10	10	Toll access article	Toll access	1	Kieling-C	Kieling	Christian	Author	2	UNIV-FED-RIO-GRANDE-DO-SUL	UNIV-FED-RIO-GRANDE-DO-SUL	UNIV-FED-RIO-GRANDE-DO-SUL	University	University - Rank 501+	0	0	0	0	0	0	0	1	0	0	0	0	0	0	0	0	0	0	0	1	0	1	0	0	Article
47405065	Pain as a global public health priority	BMC PUBLIC HEALTH	2	2	Gold OA article (APC)	Gold OA	1	Goldberg-DS	Goldberg	Daniel S.	Author, Reprint Author	1	E-CAROLINA-UNIV	E-CAROLINA-UNIV	E-CAROLINA-UNIV	University	University: Unranked	0	2145	0	1	0	0	0	0	0	0	0	0	0	0	0	0	0	0	0	0	1	1	0	1	Article
47427967	Big hopes for the children of the world: a review of the Millennium Development Goals	ANNALS OF TROPICAL PAEDIATRICS	3	2	Toll access article	Toll access	1	Keating-EM	Keating	E. M.	Author	2	MAYO-CLIN	MAYO-CLIN	MAYO-CLIN	Hospital	Hospital	0	0	0	0	0	0	0	1	0	0	1	0	0	0	0	0	0	0	0	0	0	0	0	0	Review
47431397	The Road to the United Nations High Level Meeting on Chronic Non-communicable Diseases	WEST INDIAN MEDICAL JOURNAL	2	2	Gold OA article (non-APC)	Gold OA	1	Hassell-T	Hassell	T.	Author	2	SPECIAL-ENVOY-CNCDS	SPECIAL-ENVOY-CNCDS	SPECIAL-ENVOY-CNCDS	Non-profit	Non-profit	0	0	0	0	1	0	0	0	0	0	0	1	0	0	0	0	0	0	0	0	0	0	0	0	Article
47431398	From Port-of-Spain Summit to United Nations High Level Meeting CARICOM and the Global Non-communicable Disease Agenda	WEST INDIAN MEDICAL JOURNAL	2	2	Gold OA article (non-APC)	Gold OA	1	Samuels-TA	Samuels	T. A.	Author, Reprint Author	1	UNIV-W-INDIES	UNIV-W-INDIES	UNIV-W-INDIES	University	University: Unranked	0	0	0	0	1	0	0	0	0	0	0	0	0	0	0	0	0	0	0	0	1	1	0	0	Article
47437215	Monoprosthesis for anterior vaginal prolapse and stress urinary incontinence: midterm results of an international multicentre prospective study	INTERNATIONAL UROGYNECOLOGY JOURNAL	13	7	Toll access article	Toll access	1	Palma-P	Palma	Paulo	Author	1	UNIV-ESTADUAL-CAMPINAS	UNIV-ESTADUAL-CAMPINAS	UNIV-ESTADUAL-CAMPINAS	University	University - Rank 201-500	0	0	0	0	0	0	0	1	0	0	0	0	0	0	0	0	0	0	1	0	0	1	0	0	Article
47437735	A mid-term assessment of progress towards the immunization coverage goal of the Global Immunization Vision and Strategy (GIVS)	BMC PUBLIC HEALTH	6	2	Gold OA article (APC)	Gold OA	1	Brown-DW	Brown	David W.	Author, Reprint Author	1	UNITED-NATIONS-CHILDRENS-FUND	UNITED-NATIONS-CHILDRENS-FUND	UNITED-NATIONS-CHILDRENS-FUND	Non-profit	Non-profit	0	2145	0	1	0	0	0	0	0	0	0	1	0	0	0	0	0	0	0	0	0	0	0	1	Article
47446485	Using global health initiatives to strengthen health systems: A civil society perspective	GLOBAL PUBLIC HEALTH	6	5	Toll access article	Toll access	1	Cohn-J	Cohn	Jennifer	Author, Reprint Author	1	UNIV-PENN	UNIV-PENN	UNIV-PENN	University	University - Rank 001-025	0	0	0	0	0	0	0	1	0	0	0	0	0	0	1	0	0	0	0	0	0	1	1	0	Article
47452456	Global Mental Health 4 Scale up of services for mental health in low-income and middle-income countries	LANCET	9	8	Green OA article	Green OA	1	Eaton-J	Eaton	Julian	Author, Reprint Author	1	CBM-INT	CBM-INT	CBM-INT	Non-profit	Non-profit	0	0	0	0	0	1	0	0	0	0	0	1	0	0	0	0	0	0	0	0	0	0	0	0	Article
47452636	Global Mental Health 5 Human resources for mental health care: current situation and strategies for action	LANCET	8	8	Green OA article	Green OA	1	Kakuma-R	Kakuma	Ritsuko	Author, Reprint Author	1	UNIV-MELBOURNE	UNIV-MELBOURNE	UNIV-MELBOURNE	University	University - Rank 026-050	0	0	0	0	0	1	0	0	0	0	0	0	0	0	0	1	0	0	0	0	0	1	1	0	Article
47454500	Worldwide demand for critical care	CURRENT OPINION IN CRITICAL CARE	2	3	Toll access article	Toll access	1	Adhikari-NKJ	Adhikari	Neill K. J.	Author	1	SUNNYBROOK-HLTH-SCI-CTR	SUNNYBROOK-HLTH-SCI-CTR	SUNNYBROOK-HLTH-SCI-CTR	Hospital	Hospital	0	0	0	0	0	0	0	1	0	0	1	0	0	0	0	0	0	0	0	0	0	0	0	0	Review
47469050	Reducing global health inequalities. Part 2: Myriad challenges	JOURNAL OF THE ROYAL SOCIETY OF MEDICINE	2	2	Green OA article	Green OA	1	Stuart-K	Stuart	Kenneth	Author, Reprint Author	1	UNIV-W-INDIES	UNIV-W-INDIES	UNIV-W-INDIES	University	University: Unranked	0	0	0	0	0	1	0	0	0	0	0	0	0	0	0	0	0	0	0	0	1	1	0	0	Article
47504879	Mental health and global well-being	HEALTH PROMOTION INTERNATIONAL	2	3	Hybrid article	Hybrid	1	Anderson-P	Anderson	Peter	Author, Reprint Author	1	NEWCASTLE-UNIV	NEWCASTLE-UNIV	NEWCASTLE-UNIV	University	University - Rank 201-500	0	3000	0	0	0	0	1	0	0	0	0	0	0	0	0	0	0	0	1	0	0	1	0	1	Article
47515131	Importance of sexually transmitted infections in funding for HIV within proposals to the Global Fund	SEXUALLY TRANSMITTED INFECTIONS	3	1	Green OA article	Green OA	1	LustiNarasimhan-M	Lusti-Narasimhan	Manjula	Author, Reprint Author	1	WHO	WHO	WHO	Non-profit	Non-profit	0	0	0	0	0	1	0	0	0	0	0	1	0	0	0	0	0	0	0	0	0	0	0	0	Article
47515330	The Global Fund's resource allocation decisions for HIV programmes: addressing those in need	JOURNAL OF THE INTERNATIONAL AIDS SOCIETY	4	5	Gold OA article (APC)	Gold OA	1	Avdeeva-O	Avdeeva	Olga	Author, Reprint Author	1	GLOBAL-FUND-FIGHT-AIDS-TB-&-MALARIA	GLOBAL-FUND-FIGHT-AIDS-TB-&-MALARIA	GLOBAL-FUND-FIGHT-AIDS-TB-&-MALARIA	Non-profit	Non-profit	0	2390	0	1	0	0	0	0	0	0	0	1	0	0	0	0	0	0	0	0	0	0	0	1	Article
47516259	Parental psychopathology and the risk of suicidal behavior in their offspring: results from the World Mental Health surveys	MOLECULAR PSYCHIATRY	28	25	Green OA article	Green OA	1	Gureje-O	Gureje	O.	Author, Reprint Author	1	UNIV-COLL-HOSP	UNIV-COLL-HOSP	UNIV-COLL-HOSP	Hospital	Hospital	0	0	0	0	0	1	0	0	0	0	1	0	0	0	0	0	0	0	0	0	0	0	0	0	Article
47516260	Days out of role due to common physical and mental conditions: results from the WHO World Mental Health surveys	MOLECULAR PSYCHIATRY	29	30	Green OA article	Green OA	1	Alonso-J	Alonso	J.	Author, Reprint Author	1	IMIM-INST-RECERCA-HOSP-DEL-MAR	IMIM-INST-RECERCA-HOSP-DEL-MAR	IMIM-INST-RECERCA-HOSP-DEL-MAR	Research Institute	Research Institute	0	0	0	0	0	1	0	0	0	0	0	0	1	0	0	0	0	0	0	0	0	0	0	0	Article
47531079	Avoiding the zero sum game in global cancer policy: Beyond 2011 UN high level summit	EUROPEAN JOURNAL OF CANCER	2	3	Toll access article	Toll access	1	Sullivan-R	Sullivan	R.	Author, Reprint Author	1	KINGS-COLL-LONDON	KINGS-COLL-LONDON	KINGS-COLL-LONDON	University	University - Rank 026-050	0	0	0	0	0	0	0	1	0	0	0	0	0	0	0	1	0	0	0	0	0	1	1	0	Article
47544943	Asthma programmes in diverse regions of the world: challenges, successes and lessons learnt	INTERNATIONAL JOURNAL OF TUBERCULOSIS AND LUNG DISEASE	16	15	Green OA article	Green OA	1	Lalloo-UG	Lalloo	U. G.	Author, Reprint Author	1	UNIV-KWAZULU-NATAL	UNIV-KWAZULU-NATAL	UNIV-KWAZULU-NATAL	University	University - Rank 501+	0	0	0	0	0	1	0	0	0	0	0	0	0	0	0	0	0	0	0	1	0	1	0	0	Review
47555621	Making new vaccines affordable: a comparison of financing processes used to develop and deploy new meningococcal and pneumococcal conjugate vaccines	LANCET	7	3	Green OA article	Green OA	1	Hargreaves-JR	Hargreaves	James R.	Author, Reprint Author	1	LONDON-SCH-HYG-&-TROP-MED	UCL	UCL	University	University - Rank 001-025	0	0	0	0	0	1	0	0	0	0	0	0	0	0	1	0	0	0	0	0	0	1	1	0	Review
47559447	Worldwide Incidence of Odontogenic Tumors	JOURNAL OF CRANIOFACIAL SURGERY	7	4	Toll access article	Toll access	1	Avelar-RL	Avelar	Rafael Linard	Author	3	UNIV-FED-CEARA	UNIV-FED-CEARA	UNIV-FED-CEARA	University	University - Rank 501+	0	0	0	0	0	0	0	1	0	0	0	0	0	0	0	0	0	0	0	1	0	1	0	0	Article
47569708	Global burden of chronic pulmonary aspergillosis as a sequel to pulmonary tuberculosis	BULLETIN OF THE WORLD HEALTH ORGANIZATION	3	2	Gold OA article (non-APC)	Gold OA	1	Denning-DW	Denning	David W.	Author, Reprint Author	1	UNIV-S-MANCHESTER-HOSP	UNIV-S-MANCHESTER-HOSP (UNIV-HOSP)	UNIV-S-MANCHESTER-HOSP (UNIV-HOSP)	Hospital	Hospital	0	0	0	0	1	0	0	0	0	0	1	0	0	0	0	0	0	0	0	0	0	0	0	0	Article
47569713	Assessing health system interventions: key points when considering the value of randomization	BULLETIN OF THE WORLD HEALTH ORGANIZATION	3	3	Gold OA article (non-APC)	Gold OA	1	English-M	English	Mike	Author, Reprint Author	1	KEMRI-WELLCOME-TRUST-RES-PROGRAMME	KEMRI-WELLCOME-TRUST-RES-PROGRAMME	KEMRI-WELLCOME-TRUST-RES-PROGRAMME	Non-profit	Non-profit	0	0	0	0	1	0	0	0	0	0	0	1	0	0	0	0	0	0	0	0	0	0	0	0	Article
47569714	Advance market commitment for pneumococcal vaccines: putting theory into practice	BULLETIN OF THE WORLD HEALTH ORGANIZATION	6	4	Gold OA article (non-APC)	Gold OA	1	Cernuschi-T	Cernuschi	Tania	Author	1	GAVI-ALLIANCE-SECRETARIAT	GAVI-ALLIANCE	GAVI-ALLIANCE	Non-profit	Non-profit	0	0	0	0	1	0	0	0	0	0	0	1	0	0	0	0	0	0	0	0	0	0	0	0	Article
47573268	Global burden of respiratory infections due to seasonal influenza in young children: a systematic review and meta-analysis	LANCET	47	37	Green OA article	Green OA	1	Nair-H	Nair	Harish	Author, Reprint Author	1	UNIV-EDINBURGH	UNIV-EDINBURGH	UNIV-EDINBURGH	University	University - Rank 026-050	0	0	0	0	0	1	0	0	0	0	0	0	0	0	0	1	0	0	0	0	0	1	1	0	Review
47648249	Diagnosis and Natural History of HIV-Associated Nephropathy	ADVANCES IN CHRONIC KIDNEY DISEASE	1	1	Green OA article	Green OA	1	Atta-MG	Atta	Mohamed G.	Author, Reprint Author	1	JOHNS-HOPKINS-UNIV	JOHNS-HOPKINS-UNIV	JOHNS-HOPKINS-UNIV	University	University - Rank 001-025	1	0	0	0	0	1	0	0	0	0	0	0	0	0	1	0	0	0	0	0	0	1	1	0	Article
47653231	Health Services Research and Global Health	HEALTH SERVICES RESEARCH	6	6	Green OA article	Green OA	1	Bradley-EH	Bradley	Elizabeth H.	Author, Reprint Author	1	YALE-UNIV	YALE-UNIV	YALE-UNIV	University	University - Rank 001-025	0	0	0	0	0	1	0	0	0	0	0	0	0	0	1	0	0	0	0	0	0	1	1	0	Article
47657869	Ethics in practice: the state of the debate on promoting the social value of global health research in resource poor settings particularly Africa	BMC MEDICAL ETHICS	4	3	Gold OA article (APC)	Gold OA	1	Lairumbi-GM	Lairumbi	Geoffrey M.	Author, Reprint Author	1	KEMRI-WELLCOME-TRUST-RES-PROGRAMME	KEMRI-WELLCOME-TRUST-RES-PROGRAMME	KEMRI-WELLCOME-TRUST-RES-PROGRAMME	Non-profit	Non-profit	0	2145	0	1	0	0	0	0	0	0	0	1	0	0	0	0	0	0	0	0	0	0	0	1	Article
47659635	From population control to AIDS: Conceptualising and critiquing the global crisis model	GLOBAL PUBLIC HEALTH	2	1	Toll access article	Toll access	1	Foley-EE	Foley	Ellen E.	Author, Reprint Author	1	CLARK-UNIV	CLARK-UNIV	CLARK-UNIV	University	University - Rank 201-500	0	0	0	0	0	0	0	1	0	0	0	0	0	0	0	0	0	0	1	0	0	1	0	0	Article
47666228	Adaptive Trial Design: Could We Use This Approach to Improve Clinical Trials in the Field of Global Health?	AMERICAN JOURNAL OF TROPICAL MEDICINE AND HYGIENE	1	1	Green OA article	Green OA	1	Lang-T	Lang	Trudie	Author, Reprint Author	1	UNIV-OXFORD	UNIV-OXFORD	UNIV-OXFORD	University	University - Rank 001-025	1	0	0	0	0	1	0	0	0	0	0	0	0	0	1	0	0	0	0	0	0	1	1	0	Article
47673149	Burden of anemia among indigenous populations	NUTRITION REVIEWS	3	6	Green OA article	Green OA	1	Khambalia-AZ	Khambalia	Amina Z.	Author, Reprint Author	1	UNIV-SYDNEY	UNIV-SYDNEY	UNIV-SYDNEY	University	University - Rank 051-100	0	0	0	0	0	1	0	0	0	0	0	0	0	0	0	0	1	0	0	0	0	1	0	0	Review
47686035	Global epidemiology of Barrett's esophagus	EXPERT REVIEW OF GASTROENTEROLOGY & HEPATOLOGY	2	1	Toll access article	Toll access	1	Fock-KM	Fock	Kwong Ming	Author, Reprint Author	1	CHANGI-GEN-HOSP	CHANGI-GEN-HOSP	CHANGI-GEN-HOSP	Hospital	Hospital	0	0	0	0	0	0	0	1	0	0	1	0	0	0	0	0	0	0	0	0	0	0	0	0	Review
47695238	Waterborne transmission of protozoan parasites: Review of worldwide outbreaks - An update 2004-2010	WATER RESEARCH	2	1	Green OA article	Green OA	1	Baldursson-S	Baldursson	Selma	Author	1	UNIV-COLOGNE	UNIV-COLOGNE	UNIV-COLOGNE	University	University - Rank 101-200	0	0	0	0	0	1	0	0	0	0	0	0	0	0	0	0	0	1	0	0	0	1	0	0	Review
47697511	Global cancer prevention: An important pathway to global health and development	PUBLIC HEALTH	3	2	Green OA article	Green OA	1	Beaglehole-R	Beaglehole	R.	Author	2	UNIV-AUCKLAND	UNIV-AUCKLAND	UNIV-AUCKLAND	University	University - Rank 101-200	0	0	0	0	0	1	0	0	0	0	0	0	0	0	0	0	0	1	0	0	0	1	0	0	Article
47698178	IDF Diabetes Atlas: Global estimates of the prevalence of diabetes for 2011 and 2030	DIABETES RESEARCH AND CLINICAL PRACTICE	4	1	Green OA article	Green OA	1	Whiting-DR	Whiting	David R.	Author, Reprint Author	1	INT-DIABET-FEDERAT	INT-DIABET-FEDERAT	INT-DIABET-FEDERAT	Non-profit	Non-profit	0	0	0	0	0	1	0	0	0	0	0	1	0	0	0	0	0	0	0	0	0	0	0	0	Article
47698179	The International Diabetes Federation Diabetes Atlas methodology for estimating global and national prevalence of diabetes in adults	DIABETES RESEARCH AND CLINICAL PRACTICE	4	1	Green OA article	Green OA	1	Guariguata-L	Guariguata	Leonor	Author	1	INT-DIABET-FEDERAT	INT-DIABET-FEDERAT	INT-DIABET-FEDERAT	Non-profit	Non-profit	0	0	0	0	0	1	0	0	0	0	0	1	0	0	0	0	0	0	0	0	0	0	0	0	Article
47748761	Breast cancer in the world: Incidence and mortality	SALUD PUBLICA DE MEXICO	1	1	Gold OA article (non-APC)	Gold OA	1	Curado-MP	Curado	Maria Paula	Author, Reprint Author	1	INT-AGCY-RES-CANC	INT-AGCY-RES-CANC	INT-AGCY-RES-CANC	Research institute	Research Institute	1	0	0	0	1	0	0	0	0	0	0	0	1	0	0	0	0	0	0	0	0	0	0	0	Review
47769154	Cardiometabolic risk variables in overweight and obese children: a worldwide comparison	CARDIOVASCULAR DIABETOLOGY	6	5	Gold OA article (APC)	Gold OA	1	vanVliet-M	van Vliet	Mariska	Author, Reprint Author	1	SLOTERVAART-HOSP	SLOTERVAART-HOSP	SLOTERVAART-HOSP	Hospital	Hospital	0	2410	0	1	0	0	0	0	0	0	1	0	0	0	0	0	0	0	0	0	0	0	0	1	Review
47781915	Wild immunology: converging on the real world	ANNALS OF THE NEW YORK ACADEMY OF SCIENCES	14	13	Toll access article	Toll access	1	Babayan-SA	Babayan	Simon A.	Author	1	UNIV-EDINBURGH	UNIV-EDINBURGH	UNIV-EDINBURGH	University	University - Rank 026-050	0	0	0	0	0	0	0	1	0	0	0	0	0	0	0	1	0	0	0	0	0	1	1	0	Article
47798709	Assessment of core capacities for enforcement of the International Health Regulations at points of entry in Uruguay	REVISTA PANAMERICANA DE SALUD PUBLICA-PAN AMERICAN JOURNAL OF PUBLIC HEALTH	3	1	Gold OA article (non-APC)	Gold OA	1	Alonso-L	Alonso	Lucia	Author, Reprint Author	1	MINIST-SALUD-PUBL	MINIST-SALUD-PUBL	MINIST-SALUD-PUBL	Government	Government	0	0	0	0	1	0	0	0	0	1	0	0	0	0	0	0	0	0	0	0	0	0	0	0	Article
47798727	The Pan-American Health Organization and international health: a history of formation, conceptualization and creative development	REVISTA PANAMERICANA DE SALUD PUBLICA-PAN AMERICAN JOURNAL OF PUBLIC HEALTH	2	2	Gold OA article (non-APC)	Gold OA	1	Auer-A	Auer	Annella	Author, Reprint Author	1	ORG-PANAMER-SALUD	ORG-PANAMER-SALUD	ORG-PANAMER-SALUD	Non-profit	Non-profit	0	0	0	0	1	0	0	0	0	0	0	1	0	0	0	0	0	0	0	0	0	0	0	0	Article
47798729	International financing for cooperation to develop health in Latin America and the Caribbean	REVISTA PANAMERICANA DE SALUD PUBLICA-PAN AMERICAN JOURNAL OF PUBLIC HEALTH	3	1	Gold OA article (non-APC)	Gold OA	1	DeLosRios-R	De Los Rios	Rebecca	Author, Reprint Author	1	ORG-PANAMER-SALUD	ORG-PANAMER-SALUD	ORG-PANAMER-SALUD	Non-profit	Non-profit	0	0	0	0	1	0	0	0	0	0	0	1	0	0	0	0	0	0	0	0	0	0	0	0	Article
47798731	An international health proposal to harmonize cross-border health surveillance	REVISTA PANAMERICANA DE SALUD PUBLICA-PAN AMERICAN JOURNAL OF PUBLIC HEALTH	3	3	Gold OA article (non-APC)	Gold OA	1	Quiros-HM	Manuel Quiros	Hector	Author	1	SECRETARIA-SECC-SALUD-ANTIOQUIA	SECRETARIA-SECC-SALUD-ANTIOQUIA	SECRETARIA-SECC-SALUD-ANTIOQUIA	Government	Government	0	0	0	0	1	0	0	0	0	1	0	0	0	0	0	0	0	0	0	0	0	0	0	0	Article
47798734	Costly drugs: analysis and proposals for the Mercosur countries	REVISTA PANAMERICANA DE SALUD PUBLICA-PAN AMERICAN JOURNAL OF PUBLIC HEALTH	2	2	Gold OA article (non-APC)	Gold OA	1	Marin-GH	Marin	Gustavo H.	Author, Reprint Author	1	UNIV-NACL-LA-PLATA	UNIV-NACL-LA-PLATA	UNIV-NACL-LA-PLATA	University	University: Unranked	0	0	0	0	1	0	0	0	0	0	0	0	0	0	0	0	0	0	0	0	1	1	0	0	Article
47809413	Epidemiology and Costs of Hypertension-related Disorders	CURRENT PHARMACEUTICAL DESIGN	3	3	Toll access article	Toll access	1	Leone-A	Leone	Aldo	Author	1	COMETA-CONSORTIUM	COMETA-CONSORTIUM	COMETA-CONSORTIUM	Research institute	Research Institute	0	0	0	0	0	0	0	1	0	0	0	0	1	0	0	0	0	0	0	0	0	0	0	0	Review
47831063	Physical Inactivity: The "Cinderella" Risk Factor for Noncommunicable Disease Prevention	JOURNAL OF HEALTH COMMUNICATION	2	3	Toll access article	Toll access	1	Bull-FC	Bull	Fiona C.	Author, Reprint Author	1	UNIV-WESTERN-AUSTRALIA	UNIV-WESTERN-AUSTRALIA	UNIV-WESTERN-AUSTRALIA	University	University - Rank 101-200	0	0	0	0	0	0	0	1	0	0	0	0	0	0	0	0	0	1	0	0	0	1	0	0	Article
47831067	Reducing the Silent Burden of Impaired Mental Health	JOURNAL OF HEALTH COMMUNICATION	8	8	Toll access article	Toll access	1	JaneLlopis-E	Jane-Llopis	Eva	Author, Reprint Author	1	WORLD-ECON-FORUM	WORLD-ECON-FORUM	WORLD-ECON-FORUM	Non-profit	Non-profit	0	0	0	0	0	0	0	1	0	0	0	1	0	0	0	0	0	0	0	0	0	0	0	0	Article
47831076	A Global Coordinating Platform for Noncommunicable Diseases	JOURNAL OF HEALTH COMMUNICATION	2	2	Toll access article	Toll access	1	Nishtar-S	Nishtar	Sania	Author, Reprint Author	1	HEARTFILE	HEARTFILE	HEARTFILE	Non-profit	Non-profit	0	0	0	0	0	0	0	1	0	0	0	1	0	0	0	0	0	0	0	0	0	0	0	0	Article
47833610	Emerging Nutrition Gaps in a World of Affluence - Micronutrient Intake and Status Globally	INTERNATIONAL JOURNAL FOR VITAMIN AND NUTRITION RESEARCH	2	2	Toll access article	Toll access	1	Eggersdorfer-M	Eggersdorfer	Manfred	Author	1	DSM-NUTR-PROD	DSM-NUTR-PROD-LTD	DSM-NUTR-PROD-LTD	Company	Company	0	0	0	0	0	0	0	1	1	0	0	0	0	0	0	0	0	0	0	0	0	0	0	0	Article
47840136	Utilization of Hemodiafiltration as Treatment Modality in Renal Replacement Therapy for End-Stage Renal Disease Patients - A Global Perspective	CONTRIBUTIONS TO NEPHROLOGY	2	1	Toll access article	Toll access	1	Sichart-JM	Sichart	Jan-Michael	Author, Reprint Author	1	FRESENIUS-MED-CARE	FRESENIUS-MED-CARE	FRESENIUS-MED-CARE	Company	Company	0	0	0	0	0	0	0	1	1	0	0	0	0	0	0	0	0	0	0	0	0	0	0	0	Article
47849831	Local impact of health global problems. Introduction	GACETA MEDICA DE MEXICO	1	1	Gold OA article (non-APC)	Gold OA	1	delaFuente-JR	Ramon de la Fuente	Juan	Author, Reprint Author	1	UNIV-NACL-AUTONOMA-MEXICO	UNIV-NACL-AUTONOMA-MEXICO	UNIV-NACL-AUTONOMA-MEXICO	University	University - Rank 501+	1	0	0	0	1	0	0	0	0	0	0	0	0	0	0	0	0	0	0	1	0	1	0	0	Article
47853617	Apropos "Outbreak of Chikungunya in the Republic of Congo and the global picture"	JOURNAL OF INFECTION IN DEVELOPING COUNTRIES	2	1	Gold OA article (non-APC)	Gold OA	1	Arya-SC	Arya	Subhash C.	Author, Reprint Author	1	ST-PARMANAND-HOSP	ST-PARMANAND-HOSP	ST-PARMANAND-HOSP	Hospital	Hospital	0	0	0	0	1	0	0	0	0	0	1	0	0	0	0	0	0	0	0	0	0	0	0	0	Article
47883555	Global Quality Imaging: Improvement Actions	JOURNAL OF THE AMERICAN COLLEGE OF RADIOLOGY	6	6	Green OA article	Green OA	1	Lau-LS	Lau	Lawrence S.	Author, Reprint Author	1	INT-RADIOL-QUAL-NETWORK	INT-RADIOL-QUAL-NETWORK	INT-RADIOL-QUAL-NETWORK	Scientific association	Scientific association	0	0	0	0	0	1	0	0	0	0	0	0	0	1	0	0	0	0	0	0	0	0	0	0	Article
47892994	Global Health Technology 2.0	IEEE PULSE	4	2	Green OA article	Green OA	1	Caldwell-A	Caldwell	Aya	Author, Reprint Author	1	MASSACHUSETTS-GEN-HOSP	MASSACHUSETTS-GEN-HOSP	MASSACHUSETTS-GEN-HOSP	Hospital	Hospital	0	0	0	0	0	1	0	0	0	0	1	0	0	0	0	0	0	0	0	0	0	0	0	0	Article
47893040	Perspective on Diagnostics for Global Health	IEEE PULSE	5	2	Green OA article	Green OA	1	Fu-E	Fu	Elain	Author, Reprint Author	1	UNIV-WASHINGTON	UNIV-WASHINGTON	UNIV-WASHINGTON	University	University - Rank 026-050	0	0	0	0	0	1	0	0	0	0	0	0	0	0	0	1	0	0	0	0	0	1	1	0	Article
47900256	Pancreatic cancer: Overview of descriptive epidemiology	MOLECULAR CARCINOGENESIS	6	7	Toll access article	Toll access	1	Bosetti-C	Bosetti	Cristina	Author, Reprint Author	1	IST-RIC-FARMACOL-MARIO-NEGRI	IST-RIC-FARMACOL-MARIO-NEGRI	IST-RIC-FARMACOL-MARIO-NEGRI	Research institute	Research Institute	0	0	0	0	0	0	0	1	0	0	0	0	1	0	0	0	0	0	0	0	0	0	0	0	Article
47907449	International School Mental Health: Global Approaches, Global Challenges, and Global Opportunities	CHILD AND ADOLESCENT PSYCHIATRIC CLINICS OF NORTH AMERICA	2	1	Toll access article	Toll access	1	Wei-YF	Wei	Yifeng	Author, Reprint Author	1	IWK-GRACE-HLTH-CTR-CHILDREN-WOMEN-&-FAMILIES	IWK-GRACE-HLTH-CTR-CHILDREN-WOMEN-&-FAMILIES	IWK-GRACE-HLTH-CTR-CHILDREN-WOMEN-&-FAMILIES	Hospital	Hospital	0	0	0	0	0	0	0	1	0	0	1	0	0	0	0	0	0	0	0	0	0	0	0	0	Article
47917894	Role of environmental poliovirus surveillance in global polio eradication and beyond	EPIDEMIOLOGY AND INFECTION	6	5	Green OA article	Green OA	1	Hovi-T	Hovi	T.	Author, Reprint Author	1	NATL-INST-HLTH-&-WELF-THL	NATL-INST-HLTH-&-WELF-THL	NATL-INST-HLTH-&-WELF-THL	Government	Government	0	0	0	0	0	1	0	0	0	1	0	0	0	0	0	0	0	0	0	0	0	0	0	0	Review
47918977	Correlation of worldwide incidence of type 1 diabetes (DiaMond) with prevalence of asthma and atopic eczema (ISAAC)	CLINICAL RESPIRATORY JOURNAL	4	2	Toll access article	Toll access	1	Fsadni-P	Fsadni	Peter	Author, Reprint Author	1	UNIV-MALTA	UNIV-MALTA	UNIV-MALTA	University	University: Unranked	0	0	0	0	0	0	0	1	0	0	0	0	0	0	0	0	0	0	0	0	1	1	0	0	Article
47927791	New Insights in the Clinical Understanding of Behcet's Disease	YONSEI MEDICAL JOURNAL	3	1	Gold OA article (non-APC)	Gold OA	1	Cho-SB	Cho	Sung Bin	Author	1	YONSEI-UNIV	YONSEI-UNIV	YONSEI-UNIV	University	University - Rank 201-500	0	0	0	0	1	0	0	0	0	0	0	0	0	0	0	0	0	0	1	0	0	1	0	0	Review
47928455	Human macroecology: linking pattern and process in big-picture human ecology	BIOLOGICAL REVIEWS OF THE CAMBRIDGE PHILOSOPHICAL SOCIETY	6	6	Green OA article	Green OA	1	Burnside-WR	Burnside	William R.	Author, Reprint Author	1	UNIV-NEW-MEXICO	UNIV-NEW-MEXICO	UNIV-NEW-MEXICO	University	University: Unranked	0	0	0	0	0	1	0	0	0	0	0	0	0	0	0	0	0	0	0	0	1	1	0	0	Article
47932080	The International League Against Epilepsy at the threshold of its second century: Year 2	EPILEPSIA	4	12	Green OA article	Green OA	1	Moshe-SL	Moshe	Solomon L.	Author, Reprint Author	1	ALBERT-EINSTEIN-COLL-MED	ALBERT-EINSTEIN-COLL-MED	ALBERT-EINSTEIN-COLL-MED	University	University: Unranked	0	0	0	0	0	1	0	0	0	0	0	0	0	0	0	0	0	0	0	0	1	1	0	0	Article
47940223	Extent of illicit drug use and dependence, and their contribution to the global burden of disease	LANCET	2	5	Green OA article	Green OA	1	Degenhardt-L	Degenhardt	Louisa	Author, Reprint Author	1	UNIV-NEW-S-WALES	UNIV-NEW-S-WALES	UNIV-NEW-S-WALES	University	University - Rank 051-100	0	0	0	0	0	1	0	0	0	0	0	0	0	0	0	0	1	0	0	0	0	1	0	0	Article
47954520	The status of paediatric medicines initiatives around the world-what has happened and what has not?	EUROPEAN JOURNAL OF CLINICAL PHARMACOLOGY	9	14	Toll access article	Toll access	1	Hoppu-K	Hoppu	Kalle	Author, Reprint Author	1	UNIV-HELSINKI	UNIV-HELSINKI	UNIV-HELSINKI	University	University - Rank 051-100	0	0	0	0	0	0	0	1	0	0	0	0	0	0	0	0	1	0	0	0	0	1	0	0	Review
47962700	Bridging the global health training gap: Design and evaluation of a new clinical global health course at Harvard Medical School	MEDICAL TEACHER	3	2	Hybrid article	Hybrid	1	Nelson-BD	Nelson	Brett D.	Author, Reprint Author	1	MASSACHUSETTS-GEN-HOSP	MASSACHUSETTS-GEN-HOSP	MASSACHUSETTS-GEN-HOSP	Hospital	Hospital	0	2950	0	0	0	0	1	0	0	0	1	0	0	0	0	0	0	0	0	0	0	0	0	1	Article
47972563	A Global Perspective of Wound Care (c)	ADVANCES IN SKIN & WOUND CARE	5	7	Green OA article	Green OA	1	Sibbald-RG	Sibbald	R. Gary	Author, Reprint Author	1	UNIV-TORONTO	UNIV-TORONTO	UNIV-TORONTO	University	University - Rank 001-025	0	0	0	0	0	1	0	0	0	0	0	0	0	0	1	0	0	0	0	0	0	1	1	0	Article
47989357	Governing for a Healthy Population: Towards an Understanding of How Decision-Making Will Determine Our Global Health in a Changing Climate	INTERNATIONAL JOURNAL OF ENVIRONMENTAL RESEARCH AND PUBLIC HEALTH	6	4	Gold OA article (APC)	Gold OA	1	Bowen-KJ	Bowen	Kathryn J.	Author, Reprint Author	1	AUSTRALIAN-NATL-UNIV	AUSTRALIAN-NATL-UNIV	AUSTRALIAN-NATL-UNIV	University	University - Rank 026-050	0	1650.72	0	1	0	0	0	0	0	0	0	0	0	0	0	1	0	0	0	0	0	1	1	1	Article
48017531	Lessons from SARS and H1N1/A: Employing a WHO-WTO forum to promote optimal economic-public health pandemic response	JOURNAL OF PUBLIC HEALTH POLICY	2	2	Toll access article	Toll access	1	Mackey-TK	Mackey	Tim K.	Author, Reprint Author	1	UNIV-CALIF-SAN-DIEGO	UNIV-CALIF-SAN-DIEGO	UNIV-CALIF-SAN-DIEGO	University	University - Rank 026-050	1	0	0	0	0	0	0	1	0	0	0	0	0	0	0	1	0	0	0	0	0	1	1	0	Article
48023552	Implementing clinical trials on an international platform: Challenges and perspectives	JOURNAL OF THE NEUROLOGICAL SCIENCES	7	5	Green OA article	Green OA	1	Minisman-G	Minisman	Greg	Author	1	UNIV-ALABAMA	UNIV-ALABAMA-BIRMINGHAM	UNIV-ALABAMA-BIRMINGHAM	University	University: Unranked	0	0	0	0	0	1	0	0	0	0	0	0	0	0	0	0	0	0	0	0	1	1	0	0	Review
48038931	The need for a global alcohol strategy: 'upscaling the issue in a downstreaming environment'	CLINICAL MEDICINE	2	2	Toll access article	Toll access	1	Coltart-CEM	Coltart	Cordelia E. M.	Author	1	ROYAL-COLL-PHYSICIANS	ROYAL-COLL-PHYSICIANS	ROYAL-COLL-PHYSICIANS	Scientific association	Scientific association	0	0	0	0	0	0	0	1	0	0	0	0	0	1	0	0	0	0	0	0	0	0	0	0	Article
48038933	Cavitating pulmonary tuberculosis: a global challenge	CLINICAL MEDICINE	1	2	Toll access article	Toll access	1	Saeed-W	Saeed	Waseem	Author, Reprint Author	1	MIL-HOSP	MIL-HOSP	MIL-HOSP	Hospital	Hospital	1	0	0	0	0	0	0	1	0	0	1	0	0	0	0	0	0	0	0	0	0	0	0	0	Article
48041917	Global health outreach during anesthesiology residency in the United States: a survey of interest, barriers to participation, and proposed solutions	JOURNAL OF CLINICAL ANESTHESIA	6	1	Toll access article	Toll access	1	McCunn-M	McCunn	Maureen	Author, Reprint Author	1	UNIV-PENN	UNIV-PENN	UNIV-PENN	University	University - Rank 001-025	0	0	0	0	0	0	0	1	0	0	0	0	0	0	1	0	0	0	0	0	0	1	1	0	Article
48043107	American Plastic Surgery and Global Health A Brief History	ANNALS OF PLASTIC SURGERY	5	4	Toll access article	Toll access	1	Hughes-CD	Hughes	Christopher D.	Author, Reprint Author	1	CHILDRENS-HOSP	CHILDRENS-HOSP-BOSTON	CHILDRENS-HOSP-BOSTON	Hospital	Hospital	0	0	0	0	0	0	0	1	0	0	1	0	0	0	0	0	0	0	0	0	0	0	0	0	Review
48062824	Globalisation and health inequalities: Can a human rights paradigm create space for civil society action?	SOCIAL SCIENCE & MEDICINE	2	2	Toll access article	Toll access	1	London-L	London	Leslie	Author, Reprint Author	1	UNIV-CAPE-TOWN	UNIV-CAPE-TOWN	UNIV-CAPE-TOWN	University	University - Rank 101-200	0	0	0	0	0	0	0	1	0	0	0	0	0	0	0	0	0	1	0	0	0	1	0	0	Article
48064213	Are We There Yet? Preparing Canadian Medical Students for Global Health Electives	ACADEMIC MEDICINE	6	5	Toll access article	Toll access	1	Anderson-KC	Anderson	Kelly C.	Author, Reprint Author	1	ST-MICHAELS-HOSP-TORONTO	ST-MICHAELS-HOSP-TORONTO	ST-MICHAELS-HOSP-TORONTO	Hospital	Hospital	0	0	0	0	0	0	0	1	0	0	1	0	0	0	0	0	0	0	0	0	0	0	0	0	Article
48064797	Treatment as prevention: translating efficacy trial results to population effectiveness	CURRENT OPINION IN HIV AND AIDS	3	4	Toll access article	Toll access	1	Garnett-GP	Garnett	Geoffrey P.	Author, Reprint Author	1	BILL-&-MELINDA-GATES-FDN	BILL-&-MELINDA-GATES-FDN	BILL-&-MELINDA-GATES-FDN	Non-profit	Non-profit	0	0	0	0	0	0	0	1	0	0	0	1	0	0	0	0	0	0	0	0	0	0	0	0	Review
48066417	The Global Role of Kidney Transplantation	TRANSPLANTATION	3	4	Green OA article	Green OA	1	Garcia-GG	Garcia Garcia	Guillermo	Author	1	UNIV-GUADALAJARA-HLTH-SCI-CTR-CUCS-HOSP-278	UNIV-GUADALAJARA	UNIV-GUADALAJARA-HLTH-SCI-CTR-CUCS-HOSP	Hospital	Hospital	0	0	0	0	0	1	0	0	0	0	1	0	0	0	0	0	0	0	0	0	0	0	0	0	Article
48084658	World Kidney Day 2010: Medical Aspects of 10 Live-Donor Renal Transplantations in a Single Center From a Developing Country	TRANSPLANTATION PROCEEDINGS	8	5	Green OA article	Green OA	1	Shah-PR	Shah	P. R.	Author, Reprint Author	1	INST-KIDNEY-DIS-&-RES-CTR	INST-KIDNEY-DIS-&-RES-CTR	INST-KIDNEY-DIS-&-RES-CTR	Research institute	Research Institute	0	0	0	0	0	1	0	0	0	0	0	0	1	0	0	0	0	0	0	0	0	0	0	0	Article
48113698	Challenges and Opportunities for Occupational Health Nurses in Asia	WORKPLACE HEALTH & SAFETY	4	4	Toll access article	Toll access	1	Cheung-K	Cheung	Kin	Author, Reprint Author	1	HONG-KONG-POLYTECH-UNIV	HONG-KONG-POLYTECH-UNIV	HONG-KONG-POLYTECH-UNIV	University	University - Rank 101-200	0	0	0	0	0	0	0	1	0	0	0	0	0	0	0	0	0	1	0	0	0	1	0	0	Article
48119234	Maternal leave policies and vaccination coverage: A global analysis	SOCIAL SCIENCE & MEDICINE	3	3	Toll access article	Toll access	1	Daku-M	Daku	Mark	Author, Reprint Author	1	MCGILL-UNIV	MCGILL-UNIV	MCGILL-UNIV	University	University - Rank 026-050	0	0	0	0	0	0	0	1	0	0	0	0	0	0	0	1	0	0	0	0	0	1	1	0	Article
48129040	Global Mental Health as a Component of Psychiatric Residency Training	PSYCHIATRIC QUARTERLY	3	2	Green OA article	Green OA	1	Wang-M	Wang	Michele	Author, Reprint Author	1	COLUMBIA-PRESBYTERIAN-MED-CTR	COLUMBIA-PRESBYTERIAN-MED-CTR	COLUMBIA-PRESBYTERIAN-MED-CTR	Hospital	Hospital	0	0	0	0	0	1	0	0	0	0	1	0	0	0	0	0	0	0	0	0	0	0	0	0	Article
48164305	Global Trends in Rates of Peritoneal Dialysis	JOURNAL OF THE AMERICAN SOCIETY OF NEPHROLOGY	4	2	Green OA article	Green OA	1	Jain-AK	Jain	Arsh K.	Author, Reprint Author	1	UNIV-WESTERN-ONTARIO	UNIV-WESTERN-ONTARIO	UNIV-WESTERN-ONTARIO	University	University - Rank 201-500	0	0	0	0	0	1	0	0	0	0	0	0	0	0	0	0	0	0	1	0	0	1	0	0	Article
48182240	Cohort studies around the world: Methodologies, research questions and integration to address the emerging global epidemic of chronic diseases	PUBLIC HEALTH	5	7	Toll access article	Toll access	1	Nair-H	Nair	H.	Author	3	UNIV-EDINBURGH	UNIV-EDINBURGH	UNIV-EDINBURGH	University	University - Rank 026-050	0	0	0	0	0	0	0	1	0	0	0	0	0	0	0	1	0	0	0	0	0	1	1	0	Article
48188985	Global socioeconomic inequalities in tobacco use: internationally comparable estimates from the World Health Surveys	CANCER CAUSES & CONTROL	2	1	Toll access article	Toll access	1	Harper-S	Harper	Sam	Author, Reprint Author	1	MCGILL-UNIV	MCGILL-UNIV	MCGILL-UNIV	University	University - Rank 026-050	0	0	0	0	0	0	0	1	0	0	0	0	0	0	0	1	0	0	0	0	0	1	1	0	Article
48189218	Community case management of childhood illnesses: policy and implementation in Countdown to 2015 countries	BULLETIN OF THE WORLD HEALTH ORGANIZATION	5	4	Gold OA article (non-APC)	Gold OA	1	deSousa-A	de Sousa	Alexandra	Author, Reprint Author	1	WORLD-HLTH-ORG	WHO	WHO	Non-profit	Non-profit	0	0	0	0	1	0	0	0	0	0	0	1	0	0	0	0	0	0	0	0	0	0	0	0	Article
48189223	Accounting for water quality in monitoring access to safe drinking-water as part of the Millennium Development Goals: lessons from five countries	BULLETIN OF THE WORLD HEALTH ORGANIZATION	6	4	Gold OA article (non-APC)	Gold OA	1	Bain-RES	Bain	Rob E. S.	Author	1	UNIV-BRISTOL	UNIV-BRISTOL	UNIV-BRISTOL	University	University - Rank 051-100	0	0	0	0	1	0	0	0	0	0	0	0	0	0	0	0	1	0	0	0	0	1	0	0	Article
48191129	We call for iCAALL: International Collaboration in Asthma, Allergy and Immunology	ALLERGY	12	11	Hybrid article	Hybrid	1	Lotvall-J	Lotvall	J.	Author	2	UNIV-GOTHENBURG	UNIV-GOTHENBURG	UNIV-GOTHENBURG	University	University - Rank 101-200	0	4000	0	0	0	0	1	0	0	0	0	0	0	0	0	0	0	1	0	0	0	1	0	1	Article
48224687	Consensus Statement on Standard of Care for Congenital Myopathies	JOURNAL OF CHILD NEUROLOGY	34	22	Toll access article	Toll access	1	Wang-CH	Wang	Ching H.	Author, Reprint Author	1	STANFORD-UNIV	STANFORD-UNIV	STANFORD-UNIV	University	University - Rank 001-025	0	0	0	0	0	0	0	1	0	0	0	0	0	0	1	0	0	0	0	0	0	1	1	0	Article
48242115	The worldwide epidemiology of type 2 diabetes mellitus-present and future perspectives	NATURE REVIEWS ENDOCRINOLOGY	3	1	Toll access article	Toll access	1	Chen-L	Chen	Lei	Author	1	BAKER-IDI-HEART-&-DIABET-INST	BAKER-IDI-HEART-&-DIABET-INST	BAKER-IDI-HEART-&-DIABET-INST	Research institute	Research Institute	0	0	0	0	0	0	0	1	0	0	0	0	1	0	0	0	0	0	0	0	0	0	0	0	Review
48245113	Global Iodine Status in 2011 and Trends over the Past Decade	JOURNAL OF NUTRITION	3	2	Hybrid article	Hybrid	1	Andersson-M	Andersson	Maria	Author, Reprint Author	1	SWISS-FED-INST-TECHNOL	ETH ZURICH	ETH ZURICH	University	University - Rank 001-025	0	5000	0	0	0	0	1	0	0	0	0	0	0	0	1	0	0	0	0	0	0	1	1	1	Article
48245117	Stunted Child/Overweight Mother Pairs Represent a Statistical Artifact, Not a Distinct Entity	JOURNAL OF NUTRITION	2	2	Hybrid article	Hybrid	1	Dieffenbach-S	Dieffenbach	Sara	Author	2	EMORY-UNIV	EMORY-UNIV	EMORY-UNIV	University	University - Rank 051-100	0	5000	0	0	0	0	1	0	0	0	0	0	0	0	0	0	1	0	0	0	0	1	0	1	Article
48250492	Applicability of stroke-unit care to low-income and middle-income countries	LANCET NEUROLOGY	3	2	Toll access article	Toll access	1	Langhorne-P	Langhorne	Peter	Author, Reprint Author	1	UNIV-GLASGOW	UNIV-GLASGOW	UNIV-GLASGOW	University	University - Rank 051-100	0	0	0	0	0	0	0	1	0	0	0	0	0	0	0	0	1	0	0	0	0	1	0	0	Review
48258983	The global burden of hepatitis E virus genotypes 1 and 2 in 2005	HEPATOLOGY	5	3	Green OA article	Green OA	1	Rein-DB	Rein	David B.	Author, Reprint Author	1	UNIV-CHICAGO	UNIV-CHICAGO	UNIV-CHICAGO	University	University - Rank 001-025	0	0	0	0	0	1	0	0	0	0	0	0	0	0	1	0	0	0	0	0	0	1	1	0	Article
48280347	Equity in maternal, newborn, and child health interventions in Countdown to 2015: a retrospective review of survey data from 54 countries	LANCET	9	6	Toll access article	Toll access	1	Barros-AJD	Barros	Aluisio J. D.	Author, Reprint Author	1	UNIV-FED-PELOTAS	UNIV-FED-PELOTAS	UNIV-FED-PELOTAS	University	University: Unranked	0	0	0	0	0	0	0	1	0	0	0	0	0	0	0	0	0	0	0	0	1	1	0	0	Article
48283711	Inequities in the use of cesarean section deliveries in the world	AMERICAN JOURNAL OF OBSTETRICS AND GYNECOLOGY	6	3	Toll access article	Toll access	1	Gibbons-L	Gibbons	Luz	Author, Reprint Author	1	INST-CLIN-EFFECTIVENESS-&-HLTH-POLICY-IECS	INST-CLIN-EFFECTIVENESS	INST-CLIN-EFFECTIVENESS	Research institute	Research Institute	0	0	0	0	0	0	0	1	0	0	0	0	1	0	0	0	0	0	0	0	0	0	0	0	Article
48315712	Worldwide epidemiology of liver hydatidosis including the Mediterranean area	WORLD JOURNAL OF GASTROENTEROLOGY	5	3	Gold OA article (APC)	Gold OA	1	Grosso-G	Grosso	Giuseppe	Author	1	UNIV-CATANIA	UNIV-CATANIA	UNIV-CATANIA	University	University - Rank 501+	0	1898	0	1	0	0	0	0	0	0	0	0	0	0	0	0	0	0	0	1	0	1	0	1	Article
48333856	Global epidemiology of hepatitis B virus infection: New estimates of age-specific HBsAg seroprevalence and endemicity	VACCINE	4	2	Hybrid article	Hybrid	1	Ott-JJ	Ott	J. J.	Author	1	WORLD-HLTH-ORG	WHO	WHO	Non-profit	Non-profit	0	2150	0	0	0	0	1	0	0	0	0	1	0	0	0	0	0	0	0	0	0	0	0	1	Article
48337335	The Resident Decision-Making Process in Global Health Education: Appraising Factors Influencing Participation	CLINICAL PEDIATRICS	8	3	Toll access article	Toll access	1	Castillo-J	Castillo	Jonathan	Author, Reprint Author	1	CINCINNATI-CHILDRENS-HOSP	CINCINNATI-CHILDRENS-HOSP	CINCINNATI-CHILDRENS-HOSP	Hospital	Hospital	0	0	0	0	0	0	0	1	0	0	1	0	0	0	0	0	0	0	0	0	0	0	0	0	Article
48350062	Variations between world regions in individual health: a multilevel analysis of the role of socio-economic factors	EUROPEAN JOURNAL OF PUBLIC HEALTH	4	2	Hybrid article	Hybrid	1	Witvliet-MI	Witvliet	Margot I.	Author, Reprint Author	1	UNIV-AMSTERDAM	UNIV-AMSTERDAM	UNIV-AMSTERDAM	University	University - Rank 051-100	0	2400	0	0	0	0	1	0	0	0	0	0	0	0	0	0	1	0	0	0	0	1	0	1	Article
48353025	A Global Perspective on Irritable Bowel Syndrome A Consensus Statement of the World Gastroenterology Organisation Summit Task Force on Irritable Bowel Syndrome	JOURNAL OF CLINICAL GASTROENTEROLOGY	24	1	Green OA article	Green OA	1	Quigley-EMM	Quigley	Eamonn M. M.	Author, Reprint Author	1	CORK-UNIV-HOSP	UNIV-COLL-CORK	CORK-UNIV-HOSP	Hospital	Hospital	0	0	0	0	0	1	0	0	0	0	1	0	0	0	0	0	0	0	0	0	0	0	0	0	Article
48372451	Global estimates of visual impairment: 2010	BRITISH JOURNAL OF OPHTHALMOLOGY	2	1	Toll access article	Toll access	1	Pascolini-D	Pascolini	Donatella	Author, Reprint Author	1	WORLD-HLTH-ORG	WHO	WHO	Non-profit	Non-profit	0	0	0	0	0	0	0	1	0	0	0	1	0	0	0	0	0	0	0	0	0	0	0	0	Article
48397561	Does Consideration and Assessment of Effects on Health Equity Affect the Conclusions of Systematic Reviews? A Methodology Study	PLOS ONE	10	11	Gold OA article (APC)	Gold OA	1	Welch-V	Welch	Vivian	Author, Reprint Author	1	OTTAWA-HOSP	OTTAWA-HOSP	OTTAWA-HOSP	Hospital	Hospital	0	1495	0	1	0	0	0	0	0	0	1	0	0	0	0	0	0	0	0	0	0	0	0	1	Review
48402176	Large-Scale Quality Improvement for Radiation Protection of Children Worldwide: Lessons From the Past Applied to the Present	AMERICAN JOURNAL OF ROENTGENOLOGY	4	4	Green OA article	Green OA	1	Goske-MJ	Goske	Marilyn J.	Author, Reprint Author	1	CINCINNATI-CHILDRENS-HOSP-MED-CTR	CINCINNATI-CHILDRENS-HOSP	CINCINNATI-CHILDRENS-HOSP	Hospital	Hospital	0	0	0	0	0	1	0	0	0	0	1	0	0	0	0	0	0	0	0	0	0	0	0	0	Article
48407199	A study of variations in the reported haemophilia B prevalence around the world	HAEMOPHILIA	5	5	Toll access article	Toll access	1	Stonebraker-JS	Stonebraker	J. S.	Author, Reprint Author	1	N-CAROLINA-STATE-UNIV	N-CAROLINA-STATE-UNIV	N-CAROLINA-STATE-UNIV	University	University - Rank 201-500	0	0	0	0	0	0	0	1	0	0	0	0	0	0	0	0	0	0	1	0	0	1	0	0	Article
48418466	Communication strategies to help reduce the prevalence of non-communicable diseases: Proceedings from the inaugural IFIC Foundation Global Diet and Physical Activity Communications Summit	NUTRITION REVIEWS	4	2	Green OA article	Green OA	1	Fernstrom-MH	Fernstrom	Madelyn H.	Author	2	UNIV-PITTSBURGH	UNIV-PITTSBURGH	UNIV-PITTSBURGH	University	University - Rank 051-100	0	0	0	0	0	1	0	0	0	0	0	0	0	0	0	0	1	0	0	0	0	1	0	0	Review
48432621	Drug-Resistant Tuberculosis-Current Dilemmas, Unanswered Questions, Challenges, and Priority Needs	JOURNAL OF INFECTIOUS DISEASES	24	33	Hybrid article	Hybrid	1	Zumla-A	Zumla	Alimuddin	Author, Reprint Author	1	ROYAL-FREE-HOSP	ROYAL-FREE-HOSP	ROYAL-FREE-HOSP	Hospital	Hospital	0	3500	0	0	0	0	1	0	0	0	1	0	0	0	0	0	0	0	0	0	0	0	0	1	Article
48433583	Are Countries Using Global Fund Support to Implement HIV Drug Resistance Surveillance? A Review of Funded HIV Grants	CLINICAL INFECTIOUS DISEASES	5	2	Hybrid article	Hybrid	1	Kelley-KF	Kelley	Karen F.	Author, Reprint Author	1	WORLD-HLTH-ORG	WHO	WHO	Non-profit	Non-profit	0	3500	0	0	0	0	1	0	0	0	0	1	0	0	0	0	0	0	0	0	0	0	0	1	Review
48442057	Later Onset Phenotypes of Krabbe Disease: Results of the World-Wide Registry	PEDIATRIC NEUROLOGY	9	6	Toll access article	Toll access	1	Duffner-PK	Duffner	Patricia K.	Author, Reprint Author	1	SUNY-BUFFALO	SUNY-BUFFALO	SUNY-BUFFALO	University	University - Rank 201-500	0	0	0	0	0	0	0	1	0	0	0	0	0	0	0	0	0	0	1	0	0	1	0	0	Article
48446867	Adolescent Health 4 Health of the world's adolescents: a synthesis of internationally comparable data	LANCET	12	13	Toll access article	Toll access	1	Patton-GC	Patton	George C.	Author, Reprint Author	1	ROYAL-CHILDRENS-HOSP	ROYAL-CHILDRENS-HOSP	ROYAL-CHILDRENS-HOSP	Hospital	Hospital	0	0	0	0	0	0	0	1	0	0	1	0	0	0	0	0	0	0	0	0	0	0	0	0	Article
48458472	Estimated Global Mortality Attributable to Smoke from Landscape Fires	ENVIRONMENTAL HEALTH PERSPECTIVES	9	7	Gold OA article (non-APC)	Gold OA	1	Johnston-FH	Johnston	Fay H.	Author, Reprint Author	1	UNIV-TASMANIA	UNIV-TASMANIA	UNIV-TASMANIA	University	University - Rank 201-500	0	0	0	0	1	0	0	0	0	0	0	0	0	0	0	0	0	0	1	0	0	1	0	0	Article
48464393	Measuring the population burden of chronic kidney disease: a systematic literature review of the estimated prevalence of impaired kidney function	NEPHROLOGY DIALYSIS TRANSPLANTATION	7	3	Hybrid article	Hybrid	1	McCullough-K	McCullough	Keith	Author	1	UNIV-ABERDEEN	UNIV-ABERDEEN	UNIV-ABERDEEN	University	University - Rank 101-200	0	2800	0	0	0	0	1	0	0	0	0	0	0	0	0	0	0	1	0	0	0	1	0	1	Review
48465559	Initial Lesion Volume Is an Independent Predictor of Clinical Stroke Outcome at Day 90 An Analysis of the Virtual International Stroke Trials Archive (VISTA) Database	STROKE	4	2	Hybrid article	Hybrid	1	Vogt-G	Vogt	Gerhard	Author	1	SYGNIS-BIOSCI	SYGNIS-BIOSCI	SYGNIS-BIOSCI	Company	Company	0	4500	0	0	0	0	1	0	1	0	0	0	0	0	0	0	0	0	0	0	0	0	0	1	Article
48479092	The Worldwide Impact of the Seven-valent Pneumococcal Conjugate Vaccine	PEDIATRIC INFECTIOUS DISEASE JOURNAL	4	1	Toll access article	Toll access	1	Fitzwater-SP	Fitzwater	Sean P.	Author	1	JOHNS-HOPKINS-BLOOMBERG-SCH-PUBL-HLTH	JOHNS-HOPKINS-UNIV	JOHNS-HOPKINS-UNIV	University	University - Rank 001-025	0	0	0	0	0	0	0	1	0	0	0	0	0	0	1	0	0	0	0	0	0	1	1	0	Article
48486238	Linking agriculture and health in low- and middle-income countries: an interdisciplinary research agenda	PROCEEDINGS OF THE NUTRITION SOCIETY	6	3	Green OA article	Green OA	1	Dangour-AD	Dangour	Alan D.	Author, Reprint Author	1	UNIV-LONDON-LONDON-SCH-HYG-&-TROP-MED	UNIV-LONDON-LONDON-SCH-HYG-&-TROP-MED	UNIV-LONDON-LONDON-SCH-HYG-&-TROP-MED	University	University - Rank 001-025	0	0	0	0	0	1	0	0	0	0	0	0	0	0	1	0	0	0	0	0	0	1	1	0	Article
48486423	A Review of the Personal Health Records in Selected Countries and Iran	JOURNAL OF MEDICAL SYSTEMS	4	1	Green OA article	Green OA	1	Ahmadi-M	Ahmadi	Maryam	Author	1	IRAN-UNIV-MED-SCI	IRAN-UNIV-MED-SCI	IRAN-UNIV-MED-SCI	University	University - Rank 501+	0	0	0	0	0	1	0	0	0	0	0	0	0	0	0	0	0	0	0	1	0	1	0	0	Article
48494649	The Role of Culinary-Medicinal Mushrooms on Human Welfare with a Pyramid Model for Human Health	INTERNATIONAL JOURNAL OF MEDICINAL MUSHROOMS	2	4	Toll access article	Toll access	1	Chang-ST	Chang	Shu Ting	Author, Reprint Author	1	CHINESE-UNIV-HONG-KONG	CHINESE-UNIV-HONG-KONG	CHINESE-UNIV-HONG-KONG	University	University - Rank 051-100	0	0	0	0	0	0	0	1	0	0	0	0	0	0	0	0	1	0	0	0	0	1	0	0	Article
48495711	Meeting Tomorrow's Health Care Needs Through Local and Global Involvement	JOURNAL OF CONTINUING EDUCATION IN NURSING	4	2	Toll access article	Toll access	1	Opollo-JG	Opollo	Jackline G.	Author, Reprint Author	1	UNIV-TEXAS-ARLINGTON	UNIV-TEXAS-ARLINGTON	UNIV-TEXAS-ARLINGTON	University	University - Rank 501+	0	0	0	0	0	0	0	1	0	0	0	0	0	0	0	0	0	0	0	1	0	1	0	0	Article
48507806	HIV Infection and Coronary Heart Disease: An Intersection of Epidemics	JOURNAL OF INFECTIOUS DISEASES	1	2	Green OA article	Green OA	1	Triant-VA	Triant	Virginia A.	Author, Reprint Author	1	MASSACHUSETTS-GEN-HOSP	MASSACHUSETTS-GEN-HOSP	MASSACHUSETTS-GEN-HOSP	Hospital	Hospital	1	0	0	0	0	1	0	0	0	0	1	0	0	0	0	0	0	0	0	0	0	0	0	0	Article
48508023	Hierarchical cluster analysis of labour market regulations and population health: a taxonomy of low- and middle-income countries	BMC PUBLIC HEALTH	4	4	Gold OA article (APC)	Gold OA	1	Muntaner-C	Muntaner	Carles	Author	2	UNIV-TORONTO	UNIV-TORONTO	UNIV-TORONTO	University	University - Rank 001-025	0	2145	0	1	0	0	0	0	0	0	0	0	0	0	1	0	0	0	0	0	0	1	1	1	Article
48516949	Global health training starts at home: A unique US-based global health clinical elective for residents	MEDICAL TEACHER	3	2	Hybrid article	Hybrid	1	Asgary-R	Asgary	Ramin	Author, Reprint Author	1	MT-SINAI-SCH-MED	MT-SINAI-MED-CTR	MT-SINAI-MED-CTR	Hospital	Hospital	0	2950	0	0	0	0	1	0	0	0	1	0	0	0	0	0	0	0	0	0	0	0	0	1	Article
48530865	Early Intervention to Reduce the Global Health and Economic Burden of Major Depression in Older Adults	Annual Review of Public Health	12	7	Green OA article	Green OA	1	Reynolds-CF	Reynolds	Charles F.	Author, Reprint Author	1	UNIV-PITTSBURGH	UNIV-PITTSBURGH	UNIV-PITTSBURGH	University	University - Rank 051-100	0	0	0	0	0	1	0	0	0	0	0	0	0	0	0	0	1	0	0	0	0	1	0	0	Review
48530868	Unintentional Injuries: Magnitude, Prevention, and Control	Annual Review of Public Health	4	6	Toll access article	Toll access	1	deRamirez-SS	de Ramirez	Sarah Stewart	Author, Reprint Author	1	JOHNS-HOPKINS-UNIV	JOHNS-HOPKINS-UNIV	JOHNS-HOPKINS-UNIV	University	University - Rank 001-025	0	0	0	0	0	0	0	1	0	0	0	0	0	0	1	0	0	0	0	0	0	1	1	0	Review
48532177	Global Health Training in Pediatric Residency: A Qualitative Analysis of Faculty Director Insights	ACADEMIC PEDIATRICS	4	3	Toll access article	Toll access	1	EnerizWiemer-M	Eneriz-Wiemer	Monica	Author, Reprint Author	1	STANFORD-SCH-MED	STANFORD-UNIV	STANFORD-UNIV	University	University - Rank 001-025	0	0	0	0	0	0	0	1	0	0	0	0	0	0	1	0	0	0	0	0	0	1	1	0	Article
48532178	International Electives at the University of Minnesota Global Pediatric Residency Program: Opportunities for Education in All Accreditation Council for Graduate Medical Education Competencies	ACADEMIC PEDIATRICS	6	2	Green OA article	Green OA	1	Gladding-S	Gladding	Sophia	Author	2	UNIV-MINNESOTA	UNIV-MINNESOTA	UNIV-MINNESOTA	University	University - Rank 051-100	0	0	0	0	0	1	0	0	0	0	0	0	0	0	0	0	1	0	0	0	0	1	0	0	Article
48543012	Intersectionality and gender mainstreaming in international health: Using a feminist participatory action research process to analyse voices and debates from the global south and north	SOCIAL SCIENCE & MEDICINE	14	13	Hybrid article	Hybrid	1	Tolhurst-R	Tolhurst	Rachel	Author	1	UNIV-LIVERPOOL	UNIV-LIVERPOOL	UNIV-LIVERPOOL	University	University - Rank 101-200	0	3200	0	0	0	0	1	0	0	0	0	0	0	0	0	0	0	1	0	0	0	1	0	1	Article
48544998	Unvaccinated children in years of increasing coverage: how many and who are they? Evidence from 96 low- and middle-income countries	TROPICAL MEDICINE & INTERNATIONAL HEALTH	3	3	Hybrid article	Hybrid	1	BoschCapblanch-X	Bosch-Capblanch	Xavier	Author, Reprint Author	1	SWISS-TROP-&-PUBL-HLTH-INST	SWISS-TROP-&-PUBL-HLTH-INST	SWISS-TROP-&-PUBL-HLTH-INST	Research institute	Research Institute	0	3000	0	0	0	0	1	0	0	0	0	0	1	0	0	0	0	0	0	0	0	0	0	1	Article
48545400	Public Health, Global Surveillance, and the "Emerging Disease" Worldview: A Postcolonial Appraisal of PEPFAR	HEALTH COMMUNICATION	2	1	Green OA article	Green OA	1	Sastry-S	Sastry	Shaunak	Author, Reprint Author	1	PURDUE-UNIV	PURDUE-UNIV	PURDUE-UNIV	University	University - Rank 051-100	0	0	0	0	0	1	0	0	0	0	0	0	0	0	0	0	1	0	0	0	0	1	0	0	Article
48562220	The Declaration of Istanbul-early impact and future potential	NATURE REVIEWS NEPHROLOGY	2	2	Toll access article	Toll access	1	Danovitch-GM	Danovitch	Gabriel M.	Author, Reprint Author	1	UNIV-CALIF-LOS-ANGELES	UCLA	UCLA	University	University - Rank 001-025	0	0	0	0	0	0	0	1	0	0	0	0	0	0	1	0	0	0	0	0	0	1	1	0	Article
48583159	Developing World ENT: a global responsibility	JOURNAL OF LARYNGOLOGY AND OTOLOGY	1	1	Toll access article	Toll access	1	Fagan-JJ	Fagan	J. J.	Author, Reprint Author	1	UNIV-CAPE-TOWN	UNIV-CAPE-TOWN	UNIV-CAPE-TOWN	University	University - Rank 101-200	1	0	0	0	0	0	0	1	0	0	0	0	0	0	0	0	0	1	0	0	0	1	0	0	Review
48593172	Socioeconomic inequality in domains of health: results from the World Health Surveys	BMC PUBLIC HEALTH	4	3	Gold OA article (APC)	Gold OA	1	Hosseinpoor-AR	Hosseinpoor	Ahmad Reza	Author, Reprint Author	1	WORLD-HLTH-ORG	WHO	WHO	Non-profit	Non-profit	0	2145	0	1	0	0	0	0	0	0	0	1	0	0	0	0	0	0	0	0	0	0	0	1	Article
48597568	Mapping the availability, price, and affordability of antiepileptic drugs in 46 countries	EPILEPSIA	7	7	Hybrid article	Hybrid	1	Cameron-A	Cameron	Alexandra	Author	2	WORLD-HLTH-ORG	WHO	WHO	Non-profit	Non-profit	0	3000	0	0	0	0	1	0	0	0	0	1	0	0	0	0	0	0	0	0	0	0	0	1	Article
48598308	Addressing the Implementation Gap in Global Road Safety: Exploring Features of an Effective Response and Introducing a 10-Country Program	AMERICAN JOURNAL OF PUBLIC HEALTH	7	6	Green OA article	Green OA	1	Hyder-AA	Hyder	Adnan A.	Author, Reprint Author	1	JOHNS-HOPKINS-UNIV	JOHNS-HOPKINS-UNIV	JOHNS-HOPKINS-UNIV	University	University - Rank 001-025	0	0	0	0	0	1	0	0	0	0	0	0	0	0	1	0	0	0	0	0	0	1	1	0	Article
48602839	Hookah Use: Going Down in Smoke	JOURNAL OF ADDICTIONS NURSING	3	1	Toll access article	Toll access	1	Shishani-K	Shishani	Kawkab	Author, Reprint Author	1	WASHINGTON-STATE-UNIV	WASHINGTON-STATE-UNIV	WASHINGTON-STATE-UNIV	University	University - Rank 201-500	0	0	0	0	0	0	0	1	0	0	0	0	0	0	0	0	0	0	1	0	0	1	0	0	Article
48604958	Resource Availability, Mortality, and Fertility: A Path Analytic Approach to Global Life-History Variation	HUMAN BIOLOGY	2	1	Green OA article	Green OA	1	Caudell-MA	Caudell	Mark A.	Author, Reprint Author	1	WASHINGTON-STATE-UNIV	WASHINGTON-STATE-UNIV	WASHINGTON-STATE-UNIV	University	University - Rank 201-500	0	0	0	0	0	1	0	0	0	0	0	0	0	0	0	0	0	0	1	0	0	1	0	0	Article
48605430	A global health perspective on the future of tobacco control	SALUD PUBLICA DE MEXICO	1	2	Gold OA article (non-APC)	Gold OA	1	Samet-JM	Samet	Jonathan M.	Author, Reprint Author	1	UNIV-SO-CALIF	UNIV-SO-CALIF	UNIV-SO-CALIF	University	University - Rank 051-100	1	0	0	0	1	0	0	0	0	0	0	0	0	0	0	0	1	0	0	0	0	1	0	0	Review
48605431	Health warnings on tobacco products: International practices	SALUD PUBLICA DE MEXICO	2	2	Gold OA article (non-APC)	Gold OA	1	Hammond-D	Hammond	David	Author, Reprint Author	1	UNIV-WATERLOO	UNIV-WATERLOO	UNIV-WATERLOO	University	University - Rank 101-200	0	0	0	0	1	0	0	0	0	0	0	0	0	0	0	0	0	1	0	0	0	1	0	0	Review
48608776	People's policies for the health of the poor globally	INTERNATIONAL JOURNAL OF HEALTH PLANNING AND MANAGEMENT	2	1	Toll access article	Toll access	1	Govender-V	Govender	Veloshnee	Author, Reprint Author	1	UNIV-CAPE-TOWN	UNIV-CAPE-TOWN	UNIV-CAPE-TOWN	University	University - Rank 101-200	1	0	0	0	0	0	0	1	0	0	0	0	0	0	0	0	0	1	0	0	0	1	0	0	Review
48609071	Human rights in health systems frameworks: What is there, what is missing and why does it matter?	GLOBAL PUBLIC HEALTH	8	2	Toll access article	Toll access	1	Gruskin-S	Gruskin	Sofia	Author, Reprint Author	1	HARVARD-UNIV	HARVARD-UNIV	HARVARD-UNIV	University	University - Rank 001-025	0	0	0	0	0	0	0	1	0	0	0	0	0	0	1	0	0	0	0	0	0	1	1	0	Article
48609117	Facilitative governance: Transforming global health through complexity theory	GLOBAL PUBLIC HEALTH	1	2	Toll access article	Toll access	1	Haffeld-J	Haffeld	Just	Author, Reprint Author	1	UNIV-OSLO	UNIV-OSLO	UNIV-OSLO	University	University - Rank 101-200	1	0	0	0	0	0	0	1	0	0	0	0	0	0	0	0	0	1	0	0	0	1	0	0	Article
48609118	An estimation of the worldwide economic and health burden of visual impairment	GLOBAL PUBLIC HEALTH	8	4	Toll access article	Toll access	1	Gordois-A	Gordois	Adam	Author	2	ACCESS-ECON-PTY-LTD	ACCESS-ECON-PTY-LTD	ACCESS-ECON-PTY-LTD	Company	Company	0	0	0	0	0	0	0	1	1	0	0	0	0	0	0	0	0	0	0	0	0	0	0	0	Article
48609149	Multiple crises and global health: New and necessary frontiers of health politics	GLOBAL PUBLIC HEALTH	1	2	Green OA article	Green OA	1	Schrecker-T	Schrecker	Ted	Author, Reprint Author	1	UNIV-OTTAWA	UNIV-OTTAWA	UNIV-OTTAWA	University	University - Rank 201-500	1	0	0	0	0	1	0	0	0	0	0	0	0	0	0	0	0	0	1	0	0	1	0	0	Article
48625926	The descriptive epidemiology of female breast cancer: An international comparison of screening, incidence, survival and mortality	CANCER EPIDEMIOLOGY	6	3	Toll access article	Toll access	1	Youlden-DR	Youlden	Danny R.	Author, Reprint Author	1	CANC-COUNCIL-QUEENSLAND	CANC-COUNCIL-QUEENSLAND	CANC-COUNCIL-QUEENSLAND	Non-profit	Non-profit	0	0	0	0	0	0	0	1	0	0	0	1	0	0	0	0	0	0	0	0	0	0	0	0	Review
48626118	National, regional, and worldwide estimates of preterm birth rates in the year 2010 with time trends since 1990 for selected countries: a systematic analysis and implications	LANCET	11	4	Green OA article	Green OA	1	Blencowe-H	Blencowe	Hannah	Author	2	LONDON-SCH-HYG-&-TROP-MED	UCL	UCL	University	University - Rank 001-025	0	0	0	0	0	1	0	0	0	0	0	0	0	0	1	0	0	0	0	0	0	1	1	0	Article
48626121	From the Earth Summit to Rio+20: integration of health and sustainable development	LANCET	4	5	Green OA article	Green OA	1	Haines-A	Haines	Andy	Author, Reprint Author	1	UNIV-LONDON-LONDON-SCH-HYG-&-TROP-MED	UNIV-LONDON-LONDON-SCH-HYG-&-TROP-MED	UNIV-LONDON-LONDON-SCH-HYG-&-TROP-MED	University	University - Rank 001-025	0	0	0	0	0	1	0	0	0	0	0	0	0	0	1	0	0	0	0	0	0	1	1	0	Review
48634424	A global perspective on sickle cell disease	PEDIATRIC BLOOD & CANCER	2	2	Toll access article	Toll access	1	Aygun-B	Aygun	Banu	Author	2	ST-JUDE-CHILDRENS-HOSP	ST-JUDE-CHILDRENS-HOSP	ST-JUDE-CHILDRENS-HOSP	Hospital	Hospital	0	0	0	0	0	0	0	1	0	0	1	0	0	0	0	0	0	0	0	0	0	0	0	0	Review
48635890	Global Prevalence of Autism and Other Pervasive Developmental Disorders	AUTISM RESEARCH	12	12	Green OA article	Green OA	1	Elsabbagh-M	Elsabbagh	Mayada	Author	1	MONTREAL-CHILDRENS-HOSP	MCGILL-UNIV	MCGILL-UNIV-HOSP	Hospital	Hospital	0	0	0	0	0	1	0	0	0	0	1	0	0	0	0	0	0	0	0	0	0	0	0	0	Review
48635894	A Global Public Health Strategy for Autism Spectrum Disorders	AUTISM RESEARCH	8	7	Green OA article	Green OA	1	Wallace-S	Wallace	Simon	Author	1	AUTISM-SPEAKS	AUTISM-SPEAKS	AUTISM-SPEAKS	Non-profit	Non-profit	0	0	0	0	0	1	0	0	0	0	0	1	0	0	0	0	0	0	0	0	0	0	0	0	Article
48661712	Global environmental health and sustainable development: the role at Rio+20	CIENCIA & SAUDE COLETIVA	2	1	Gold OA article (non-APC)	Gold OA	1	Furie-GL	Furie	Gregg Lawrence	Author, Reprint Author	1	YALE-UNIV	YALE-UNIV	YALE-UNIV	University	University - Rank 001-025	1	0	0	0	1	0	0	0	0	0	0	0	0	0	1	0	0	0	0	0	0	1	1	0	Article
48663884	An International registry on Autoinflammatory diseases: the Eurofever experience	ANNALS OF THE RHEUMATIC DISEASES	24	25	Toll access article	Toll access	1	Toplak-N	Toplak	Natasa	Author	25	UNIV-MED-CTR-LJUBLJANA	UNIV-LJUBLJANA	UNIV-LJUBLJANA	University	University - Rank 501+	0	0	0	0	0	0	0	1	0	0	0	0	0	0	0	0	0	0	0	1	0	1	0	0	Article
48694834	The impact of globalisation on the distribution of Echinococcus multilocularis	TRENDS IN PARASITOLOGY	5	5	Toll access article	Toll access	1	Davidson-RK	Davidson	Rebecca K.	Author, Reprint Author	1	NORWEGIAN-VET-INST	NORWEGIAN-VET-INST	NORWEGIAN-VET-INST	University	University: Unranked	0	0	0	0	0	0	0	1	0	0	0	0	0	0	0	0	0	0	0	0	1	1	0	0	Review
48707053	The global childhood obesity epidemic and the association between socio-economic status and childhood obesity	INTERNATIONAL REVIEW OF PSYCHIATRY	2	1	Green OA article	Green OA	1	Wang-YF	Wang	Youfa	Author, Reprint Author	1	JOHNS-HOPKINS-BLOOMBERG-SCH-PUBL-HLTH	JOHNS-HOPKINS-UNIV	JOHNS-HOPKINS-UNIV	University	University - Rank 001-025	0	0	0	0	0	1	0	0	0	0	0	0	0	0	1	0	0	0	0	0	0	1	1	0	Article
48707158	Implementing the Global Plan to Stop TB, 2011-2015-Optimizing Allocations and the Global Fund's Contribution: A Scenario Projections Study	PLOS ONE	8	5	Gold OA article (APC)	Gold OA	1	Korenromp-EL	Korenromp	Eline L.	Author, Reprint Author	1	GLOBAL-FUND-FIGHT-AIDS-TB-&-MALARIA	GLOBAL-FUND-FIGHT-AIDS-TB-&-MALARIA	GLOBAL-FUND-FIGHT-AIDS-TB-&-MALARIA	Non-profit	Non-profit	0	1495	0	1	0	0	0	0	0	0	0	1	0	0	0	0	0	0	0	0	0	0	0	1	Article
48708882	The Global Role of Kidney Transplantation	KIDNEY & BLOOD PRESSURE RESEARCH	3	4	Gold OA article (APC)	Gold OA	1	Garcia-GG	Garcia	Guillermo Garcia	Author, Reprint Author	1	UNIV-GUADALAJARA	UNIV-GUADALAJARA	UNIV-GUADALAJARA	University	University - Rank 501+	0	1299.94	0	1	0	0	0	0	0	0	0	0	0	0	0	0	0	0	0	1	0	1	0	1	Article
48710779	STI epidemiology in the global older population: emerging challenges	PERSPECTIVES IN PUBLIC HEALTH	4	3	Toll access article	Toll access	1	Minichiello-V	Minichiello	Victor	Author, Reprint Author	1	UNIV-NEW-ENGLAND	UNIV-NEW-ENGLAND	UNIV-NEW-ENGLAND	University	University: Unranked	0	0	0	0	0	0	0	1	0	0	0	0	0	0	0	0	0	0	0	0	1	1	0	0	Article
48724841	International cohort studies	BUNDESGESUNDHEITSBLATT-GESUNDHEITSFORSCHUNG-GESUNDHEITSSCHUTZ	2	1	Toll access article	Toll access	1	Ahrens-W	Ahrens	W.	Author, Reprint Author	1	UNIV-BREMEN	UNIV-BREMEN	UNIV-BREMEN	University	University - Rank 201-500	0	0	0	0	0	0	0	1	0	0	0	0	0	0	0	0	0	0	1	0	0	1	0	0	Article
48725320	Challenges in International Medicine: Ethical Dilemmas, Unanticipated Consequences, and Accepting Limitations	ACADEMIC EMERGENCY MEDICINE	3	5	Hybrid article	Hybrid	1	Iserson-KV	Iserson	Kenneth V.	Author, Reprint Author	1	UNIV-ARIZONA	UNIV-ARIZONA	UNIV-ARIZONA	University	University - Rank 101-200	0	3000	0	0	0	0	1	0	0	0	0	0	0	0	0	0	0	1	0	0	0	1	0	1	Article
48732620	From Online Randomized Controlled Trials to Participant Preference Studies: Morphing the San Francisco Stop Smoking Site into a Worldwide Smoking Cessation Resource	JOURNAL OF MEDICAL INTERNET RESEARCH	5	3	Gold OA article (APC)	Gold OA	1	Munoz-RF	Munoz	Ricardo F.	Author, Reprint Author	1	UNIV-CALIF-SAN-FRANCISCO	UCSF	UCSF	University	University - Rank 001-025	0	2500	0	1	0	0	0	0	0	0	0	0	0	0	1	0	0	0	0	0	0	1	1	1	Article
48746138	Associations of economic and gender inequality with global obesity prevalence: Understanding the female excess	SOCIAL SCIENCE & MEDICINE	4	4	Green OA article	Green OA	1	Wells-JCK	Wells	Jonathan C. K.	Author, Reprint Author	1	UCL-INST-CHILD-HLTH	UCL	UCL	University	University - Rank 001-025	0	0	0	0	0	1	0	0	0	0	0	0	0	0	1	0	0	0	0	0	0	1	1	0	Article
48759056	Global Health Business: The Production and Performativity of Statistics in Sierra Leone and Germany	MEDICAL ANTHROPOLOGY	1	2	Toll access article	Toll access	1	Erikson-SL	Erikson	Susan L.	Author, Reprint Author	1	SIMON-FRASER-UNIV	SIMON-FRASER-UNIV	SIMON-FRASER-UNIV	University	University - Rank 201-500	1	0	0	0	0	0	0	1	0	0	0	0	0	0	0	0	0	0	1	0	0	1	0	0	Article
48763119	World Health Organization Perspective on Implementation of International Health Regulations	EMERGING INFECTIOUS DISEASES	1	1	Gold OA article (non-APC)	Gold OA	1	Hardiman-MC	Hardiman	Maxwell Charles	Author, Reprint Author	1	WHO	WHO	WHO	Non-profit	Non-profit	1	0	0	0	1	0	0	0	0	0	0	1	0	0	0	0	0	0	0	0	0	0	0	0	Article
48764303	Epidemiology of burns throughout the World. Part II: Intentional burns in adults	BURNS	1	3	Toll access article	Toll access	1	Peck-MD	Peck	Michael D.	Author, Reprint Author	1	MARICOPA-CTY-GEN-HOSP	MARICOPA-CTY-GEN-HOSP	MARICOPA-CTY-GEN-HOSP	Hospital	Hospital	1	0	0	0	0	0	0	1	0	0	1	0	0	0	0	0	0	0	0	0	0	0	0	0	Review
48777314	Revising and refining the epilepsy classification system: Priorities from a developing world perspective	EPILEPSIA	1	2	Green OA article	Green OA	1	Birbeck-GL	Birbeck	Gretchen L.	Author, Reprint Author	1	MICHIGAN-STATE-UNIV	MICHIGAN-STATE-UNIV	MICHIGAN-STATE-UNIV	University	University - Rank 101-200	1	0	0	0	0	1	0	0	0	0	0	0	0	0	0	0	0	1	0	0	0	1	0	0	Article
48779625	Teaching Global Public Health in the Undergraduate Liberal Arts: A Survey of 50 Colleges	AMERICAN JOURNAL OF TROPICAL MEDICINE AND HYGIENE	3	4	Green OA article	Green OA	1	Hill-DR	Hill	David R.	Author, Reprint Author	1	QUINNIPIAC-UNIV	QUINNIPIAC-UNIV	QUINNIPIAC-UNIV	University	University: Unranked	0	0	0	0	0	1	0	0	0	0	0	0	0	0	0	0	0	0	0	0	1	1	0	0	Article
48794976	Global Health and Primary Care: Increasing Burden of Chronic Diseases and Need for Integrated Training	MOUNT SINAI JOURNAL OF MEDICINE	7	2	Green OA article	Green OA	1	Truglio-J	Truglio	Joseph	Author	1	MT-SINAI-SCH-MED	MT-SINAI-MED-CTR	MT-SINAI-MED-CTR	Hospital	Hospital	0	0	0	0	0	1	0	0	0	0	1	0	0	0	0	0	0	0	0	0	0	0	0	0	Article
48796624	World Gastroenterology Organisation Global Guidelines on Obesity	JOURNAL OF CLINICAL GASTROENTEROLOGY	13	1	Green OA article	Green OA	1	MathusVliegen-L	Mathus-Vliegen	Lisbeth	Author	1	FLINDERS-UNIV-S-AUSTRALIA	FLINDERS-UNIV-S-AUSTRALIA	FLINDERS-UNIV-S-AUSTRALIA	University	University - Rank 201-500	0	0	0	0	0	1	0	0	0	0	0	0	0	0	0	0	0	0	1	0	0	1	0	0	Article
48803610	Update on counterfeit antibiotics worldwide; Public health risks	MEDECINE ET MALADIES INFECTIEUSES	3	2	Toll access article	Toll access	1	Delepierre-A	Delepierre	A.	Author	2	FAC-SCI-PHARMACEUT-&-BIOL	FAC-SCI-PHARMACEUT-&-BIOL	FAC-SCI-PHARMACEUT-&-BIOL	University	University: Unranked	0	0	0	0	0	0	0	1	0	0	0	0	0	0	0	0	0	0	0	0	1	1	0	0	Review
48810620	Worldwide Alzheimer's Disease Neuroimaging Initiative	ALZHEIMERS & DEMENTIA	4	4	Toll access article	Toll access	1	Carrillo-MC	Carrillo	Maria C.	Author, Reprint Author	1	ALZHEIMERS-ASSOC	ALZHEIMERS-ASSOC	ALZHEIMERS-ASSOC	Non-profit	Non-profit	0	0	0	0	0	0	0	1	0	0	0	1	0	0	0	0	0	0	0	0	0	0	0	0	Article
48810866	The need for worldwide policy and action plans for rare diseases	ACTA PAEDIATRICA	13	12	Green OA article	Green OA	1	Forman-J	Forman	John	Author, Reprint Author	1	NEW-ZEALAND-ORG-RARE-DISORDERS	NEW-ZEALAND-ORG-RARE-DISORDERS	NEW-ZEALAND-ORG-RARE-DISORDERS	Research institute	Research Institute	0	0	0	0	0	1	0	0	0	0	0	0	1	0	0	0	0	0	0	0	0	0	0	0	Article
48811274	Food systems: New-Ruralism versus New-Urbanism	JOURNAL OF THE SCIENCE OF FOOD AND AGRICULTURE	4	2	Green OA article	Green OA	1	Azadi-H	Azadi	Hossein	Author, Reprint Author	1	UNIV-GHENT	UNIV-GHENT	UNIV-GHENT	University	University - Rank 101-200	0	0	0	0	0	1	0	0	0	0	0	0	0	0	0	0	0	1	0	0	0	1	0	0	Article
48825035	Lay perspectives on hypertension and drug adherence: systematic review of qualitative research	BRITISH MEDICAL JOURNAL	3	2	Green OA article	Green OA	1	Marshall-IJ	Marshall	Iain J.	Author, Reprint Author	1	KINGS-COLL-LONDON	KINGS-COLL-LONDON	KINGS-COLL-LONDON	University	University - Rank 026-050	0	0	0	0	0	1	0	0	0	0	0	0	0	0	0	1	0	0	0	0	0	1	1	0	Review
48827414	Regional differences in treatment response and three year course of schizophrenia across the world	JOURNAL OF PSYCHIATRIC RESEARCH	9	8	Toll access article	Toll access	1	Novick-D	Novick	Diego	Author, Reprint Author	1	ELI-LILLY-&-CO	ELI-LILLY-&-CO	ELI-LILLY-&-CO	Company	Company	0	0	0	0	0	0	0	1	1	0	0	0	0	0	0	0	0	0	0	0	0	0	0	0	Article
48835880	Global physical activity levels: surveillance progress, pitfalls, and prospects	LANCET	6	7	Green OA article	Green OA	1	Hallal-PC	Hallal	Pedro C.	Author, Reprint Author	1	UNIV-FED-PELOTAS	UNIV-FED-PELOTAS	UNIV-FED-PELOTAS	University	University: Unranked	0	0	0	0	0	1	0	0	0	0	0	0	0	0	0	0	0	0	0	0	1	1	0	0	Article
48835881	Correlates of physical activity: why are some people physically active and others not?	LANCET	6	8	Green OA article	Green OA	1	Bauman-AE	Bauman	Adrian E.	Author, Reprint Author	1	UNIV-SYDNEY	UNIV-SYDNEY	UNIV-SYDNEY	University	University - Rank 051-100	0	0	0	0	0	1	0	0	0	0	0	0	0	0	0	0	1	0	0	0	0	1	0	0	Article
48835882	Evidence-based intervention in physical activity: lessons from around the world	LANCET	8	10	Toll access article	Toll access	1	Heath-GW	Heath	Gregory W.	Author, Reprint Author	1	UNIV-TENNESSEE	UNIV-TENNESSEE	UNIV-TENNESSEE	University	University - Rank 201-500	0	0	0	0	0	0	0	1	0	0	0	0	0	0	0	0	0	0	1	0	0	1	0	0	Article
48835883	The implications of megatrends in information and communication technology and transportation for changes in global physical activity	LANCET	7	8	Toll access article	Toll access	1	Pratt-M	Pratt	Michael	Author, Reprint Author	1	CTR-DIS-CONTROL-&-PREVENT	CDC	CDC	Government	Government	0	0	0	0	0	0	0	1	0	1	0	0	0	0	0	0	0	0	0	0	0	0	0	0	Article
48835884	The pandemic of physical inactivity: global action for public health	LANCET	7	9	Green OA article	Green OA	1	Kohl-HW	Kohl	Harold W.	Author, Reprint Author	1	UNIV-TEXAS-HLTH-SCI-CTR	UNIV-TEXAS-HLTH-SCI-CTR (UNIV-HOSP)	UNIV-TEXAS-HLTH-SCI-CTR (UNIV-HOSP)	Hospital	Hospital	0	0	0	0	0	1	0	0	0	0	1	0	0	0	0	0	0	0	0	0	0	0	0	0	Article
48838752	Building global advocacy for nutrition: A review of the European and US landscapes	FOOD AND NUTRITION BULLETIN	3	2	Toll access article	Toll access	1	Dangour-AD	Dangour	Alan D.	Author, Reprint Author	1	UNIV-LONDON-LONDON-SCH-HYG-&-TROP-MED	UNIV-LONDON-LONDON-SCH-HYG-&-TROP-MED	UNIV-LONDON-LONDON-SCH-HYG-&-TROP-MED	University	University - Rank 001-025	0	0	0	0	0	0	0	1	0	0	0	0	0	0	1	0	0	0	0	0	0	1	1	0	Article
48850998	Global Fund investments in harm reduction from 2002 to 2009	INTERNATIONAL JOURNAL OF DRUG POLICY	4	3	Hybrid article	Hybrid	1	Bridge-J	Bridge	Jamie	Author, Reprint Author	1	GLOBAL-FUND-FIGHT-AIDS-TB-&-MALARIA	GLOBAL-FUND-FIGHT-AIDS-TB-&-MALARIA	GLOBAL-FUND-FIGHT-AIDS-TB-&-MALARIA	Non-profit	Non-profit	0	2500	0	0	0	0	1	0	0	0	0	1	0	0	0	0	0	0	0	0	0	0	0	1	Article
48854404	Guiding principles for the development of global health education curricula in undergraduate medical education	MEDICAL TEACHER	4	3	Hybrid article	Hybrid	1	Peluso-MJ	Peluso	Michael J.	Author, Reprint Author	1	YALE-UNIV	YALE-UNIV	YALE-UNIV	University	University - Rank 001-025	0	2950	0	0	0	0	1	0	0	0	0	0	0	0	1	0	0	0	0	0	0	1	1	1	Article
48854612	GLOBAL SOLIDARITY, MIGRATION AND GLOBAL HEALTH INEQUITY	BIOETHICS	3	3	Green OA article	Green OA	1	Eckenwiler-L	Eckenwiler	Lisa	Author, Reprint Author	1	GEORGE-MASON-UNIV	GEORGE-MASON-UNIV	GEORGE-MASON-UNIV	University	University - Rank 201-500	0	0	0	0	0	1	0	0	0	0	0	0	0	0	0	0	0	0	1	0	0	1	0	0	Article
48859653	Prevalence of chronic hepatitis B among foreign-born persons living in the United States by country of origin	HEPATOLOGY	5	5	Green OA article	Green OA	1	Kowdley-KV	Kowdley	Kris V.	Author	2	VIRGINIA-MASON-MED-CTR	VIRGINIA-MASON-MED-CTR	VIRGINIA-MASON-MED-CTR	Hospital	Hospital	0	0	0	0	0	1	0	0	0	0	1	0	0	0	0	0	0	0	0	0	0	0	0	0	Article
48863239	Global epidemiology of HIV infection in men who have sex with men	LANCET	7	6	Green OA article	Green OA	1	Beyrer-C	Beyrer	Chris	Author, Reprint Author	1	JOHNS-HOPKINS-BLOOMBERG-SCH-PUBL-HLTH	JOHNS-HOPKINS-UNIV	JOHNS-HOPKINS-UNIV	University	University - Rank 001-025	0	0	0	0	0	1	0	0	0	0	0	0	0	0	1	0	0	0	0	0	0	1	1	0	Article
48867210	GLOBAL HEALTH COMPETENCIES FOR NURSES IN THE AMERICAS	JOURNAL OF PROFESSIONAL NURSING	9	5	Green OA article	Green OA	1	Wilson-L	Wilson	Lynda	Author, Reprint Author	1	UNIV-ALABAMA-BIRMINGHAM	UNIV-ALABAMA-BIRMINGHAM	UNIV-ALABAMA-BIRMINGHAM	University	University: Unranked	0	0	0	0	0	1	0	0	0	0	0	0	0	0	0	0	0	0	0	0	1	1	0	0	Article
48870113	Transportability of tertiary qualifications and CPD: A continuing challenge for the global health workforce	BMC MEDICAL EDUCATION	4	5	Gold OA article (APC)	Gold OA	1	Saltman-DC	Saltman	Deborah C.	Author	3	UNIV-TECHNOL-SYDNEY	UNIV-TECHNOL-SYDNEY	UNIV-TECHNOL-SYDNEY	University	University - Rank 201-500	0	2145	0	1	0	0	0	0	0	0	0	0	0	0	0	0	0	0	1	0	0	1	0	1	Article
48876879	Global Cardiovascular Health Promotion and Disease Prevention 2011 and Beyond	CIRCULATION	2	2	Hybrid article	Hybrid	1	Labarthe-DR	Labarthe	Darwin R.	Author, Reprint Author	1	NORTHWESTERN-UNIV	NORTHWESTERN-UNIV	NORTHWESTERN-UNIV	University	University - Rank 001-025	0	4600	0	0	0	0	1	0	0	0	0	0	0	0	1	0	0	0	0	0	0	1	1	1	Article
48877026	Global cancer transitions according to the Human Development Index (2008-2030): a population-based study	LANCET ONCOLOGY	5	2	Toll access article	Toll access	1	Bray-F	Bray	Freddie	Author, Reprint Author	1	INT-AGCY-RES-CANC	INT-AGCY-RES-CANC	INT-AGCY-RES-CANC	Research institute	Research Institute	0	0	0	0	0	0	0	1	0	0	0	0	1	0	0	0	0	0	0	0	0	0	0	0	Article
48879420	A Chronicle of Hope and Promise: The World As It Was, As It Is, and As It Can Be	JAIDS-JOURNAL OF ACQUIRED IMMUNE DEFICIENCY SYNDROMES	4	4	Green OA article	Green OA	1	ElSadr-WM	El-Sadr	Wafaa M.	Author, Reprint Author	1	COLUMBIA-UNIV	COLUMBIA-UNIV	COLUMBIA-UNIV	University	University - Rank 001-025	0	0	0	0	0	1	0	0	0	0	0	0	0	0	1	0	0	0	0	0	0	1	1	0	Article
48879421	The United States President's Emergency Plan for AIDS Relief: A Story of Partnerships and Smart Investments to Turn the Tide of the Global AIDS Pandemic	JAIDS-JOURNAL OF ACQUIRED IMMUNE DEFICIENCY SYNDROMES	7	3	Green OA article	Green OA	1	Goosby-E	Goosby	Eric	Author	1	OFF-US-GLOBAL-AIDS-COORDINATOR	OFF-US-GLOBAL-AIDS-COORDINATOR	OFF-US-GLOBAL-AIDS-COORDINATOR	Government	Government	0	0	0	0	0	1	0	0	0	1	0	0	0	0	0	0	0	0	0	0	0	0	0	0	Article
48879425	Progress, Challenges, and New Opportunities for the Prevention of Mother-to-Child Transmission of HIV Under the US President's Emergency Plan for AIDS Relief	JAIDS-JOURNAL OF ACQUIRED IMMUNE DEFICIENCY SYNDROMES	12	11	Green OA article	Green OA	1	Chi-BH	Chi	Benjamin H.	Author, Reprint Author	1	CTR-INFECT-DIS-RES-ZAMBIA	CTR-INFECT-DIS-RES-ZAMBIA	CTR-INFECT-DIS-RES-ZAMBIA	Research institute	Research Institute	0	0	0	0	0	1	0	0	0	0	0	0	1	0	0	0	0	0	0	0	0	0	0	0	Article
48879429	PEPFAR, Health System Strengthening, and Promoting Sustainability and Country Ownership	JAIDS-JOURNAL OF ACQUIRED IMMUNE DEFICIENCY SYNDROMES	9	6	Green OA article	Green OA	1	Palen-J	Palen	John	Author, Reprint Author	1	ABT-ASSOCIATES-INC	ABT-ASSOCIATES-INC	ABT-ASSOCIATES-INC	Company	Company	0	0	0	0	0	1	0	0	1	0	0	0	0	0	0	0	0	0	0	0	0	0	0	0	Article
48879430	Beyond Indicators: Advances in Global HIV Monitoring and Evaluation During the PEPFAR Era	JAIDS-JOURNAL OF ACQUIRED IMMUNE DEFICIENCY SYNDROMES	12	12	Green OA article	Green OA	1	Porter-LE	Porter	Laura E.	Author, Reprint Author	1	CTR-DIS-CONTROL-&-PREVENT	CDC	CDC	Government	Government	0	0	0	0	0	1	0	0	0	1	0	0	0	0	0	0	0	0	0	0	0	0	0	0	Article
48879431	Saving Lives for a Lifetime: Supporting Orphans and Vulnerable Children Impacted by HIV/AIDS	JAIDS-JOURNAL OF ACQUIRED IMMUNE DEFICIENCY SYNDROMES	8	7	Green OA article	Green OA	1	Nyberg-BJ	Nyberg	Beverly J.	Author, Reprint Author	1	PEACE-CORPS	PEACE-CORPS	PEACE-CORPS	Non-profit	Non-profit	0	0	0	0	0	1	0	0	0	0	0	1	0	0	0	0	0	0	0	0	0	0	0	0	Article
48879432	PEPFAR Support for the Scaling Up of Collaborative TB/HIV Activities	JAIDS-JOURNAL OF ACQUIRED IMMUNE DEFICIENCY SYNDROMES	9	11	Green OA article	Green OA	1	Howard-AA	Howard	Andrea A.	Author, Reprint Author	1	COLUMBIA-UNIV	COLUMBIA-UNIV	COLUMBIA-UNIV	University	University - Rank 001-025	0	0	0	0	0	1	0	0	0	0	0	0	0	0	1	0	0	0	0	0	0	1	1	0	Article
48879433	PEPFAR's Evolving HIV Prevention Approaches for Key Populations-People Who Inject Drugs, Men Who Have Sex With Men, and Sex Workers: Progress, Challenges, and Opportunities	JAIDS-JOURNAL OF ACQUIRED IMMUNE DEFICIENCY SYNDROMES	10	9	Green OA article	Green OA	1	Needle-R	Needle	Richard	Author, Reprint Author	1	US-DEPT-STATE	US-DEPT-STATE	US-DEPT-STATE	Government	Government	0	0	0	0	0	1	0	0	0	1	0	0	0	0	0	0	0	0	0	0	0	0	0	0	Article
48879434	The Expanding Role of Civil Society in the Global HIV/AIDS Response: What Has The President's Emergency Program For AIDS Relief's Role Been?	JAIDS-JOURNAL OF ACQUIRED IMMUNE DEFICIENCY SYNDROMES	6	4	Green OA article	Green OA	1	Coutinho-A	Coutinho	Alex	Author, Reprint Author	1	MAKERERE-UNIV	MAKERERE-UNIV	MAKERERE-UNIV	University	University - Rank 201-500	0	0	0	0	0	1	0	0	0	0	0	0	0	0	0	0	0	0	1	0	0	1	0	0	Article
48879435	Raising the Bar: PEPFAR and New Paradigms for Global Health	JAIDS-JOURNAL OF ACQUIRED IMMUNE DEFICIENCY SYNDROMES	5	1	Green OA article	Green OA	1	Goosby-E	Goosby	Eric	Author, Reprint Author	1	US-DEPT-STATE	US-DEPT-STATE	US-DEPT-STATE	Government	Government	0	0	0	0	0	1	0	0	0	1	0	0	0	0	0	0	0	0	0	0	0	0	0	0	Article
48886819	Chronic Obstructive Pulmonary Disease: A Worldwide Problem	MEDICAL CLINICS OF NORTH AMERICA	2	2	Toll access article	Toll access	1	Soriano-JB	Soriano	Joan B.	Author, Reprint Author	1	FUNDACIO-CAUBET-CIMERA-ILLES-BALEARS	FUNDACIO-CAUBET-CIMERA-ILLES-BALEARS	FUNDACIO-CAUBET-CIMERA-ILLES-BALEARS	Research institute	Research Institute	0	0	0	0	0	0	0	1	0	0	0	0	1	0	0	0	0	0	0	0	0	0	0	0	Article
48894448	Case study methodology in nurse migration research: An integrative review	APPLIED NURSING RESEARCH	5	4	Toll access article	Toll access	1	Freeman-M	Freeman	Michelle	Author, Reprint Author	1	MCMASTER-UNIV	MCMASTER-UNIV	MCMASTER-UNIV	University	University - Rank 101-200	0	0	0	0	0	0	0	1	0	0	0	0	0	0	0	0	0	1	0	0	0	1	0	0	Review
48896181	Technologies for global health	LANCET	27	15	Toll access article	Toll access	1	Howitt-P	Howitt	Peter	Author, Reprint Author	1	UNIV-LONDON-IMPERIAL-COLL-SCI-TECHNOL-&-MED	UNIV-LONDON-IMPERIAL-COLL-SCI-TECHNOL-&-MED	UNIV-LONDON-IMPERIAL-COLL-SCI-TECHNOL-&-MED	University	University - Rank 001-025	0	0	0	0	0	0	0	1	0	0	0	0	0	0	1	0	0	0	0	0	0	1	1	0	Review
48899689	Improving musculoskeletal health: Global issues	BEST PRACTICE & RESEARCH IN CLINICAL RHEUMATOLOGY	2	2	Toll access article	Toll access	1	Mody-GM	Mody	Girish M.	Author, Reprint Author	1	UNIV-KWAZULU-NATAL	UNIV-KWAZULU-NATAL	UNIV-KWAZULU-NATAL	University	University - Rank 501+	0	0	0	0	0	0	0	1	0	0	0	0	0	0	0	0	0	0	0	1	0	1	0	0	Article
48911398	A worldwide investigation of tuberculosis epidemics	HEALTH CARE MANAGEMENT SCIENCE	2	2	Green OA article	Green OA	1	Currie-CSM	Currie	Christine S. M.	Author	2	UNIV-SOUTHAMPTON	UNIV-SOUTHAMPTON	UNIV-SOUTHAMPTON	University	University - Rank 101-200	0	0	0	0	0	1	0	0	0	0	0	0	0	0	0	0	0	1	0	0	0	1	0	0	Article
48945507	Global health and national borders: the ethics of foreign aid in a time of financial crisis	GLOBALIZATION AND HEALTH	4	4	Gold OA article (APC)	Gold OA	1	Johri-M	Johri	Mira	Author, Reprint Author	1	CHUM	UNIV-MONTREAL	UNIV-MONTREAL-HOSP	Hospital	Hospital	0	2145	0	1	0	0	0	0	0	0	1	0	0	0	0	0	0	0	0	0	0	0	0	1	Article
48950847	Current needs and future directions of occupational safety and heath in a globalized world	NEUROTOXICOLOGY	7	4	Green OA article	Green OA	1	Perera-FP	Perera	Frederica P.	Author	2	COLUMBIA-UNIV	COLUMBIA-UNIV	COLUMBIA-UNIV	University	University - Rank 001-025	0	0	0	0	0	1	0	0	0	0	0	0	0	0	1	0	0	0	0	0	0	1	1	0	Article
48955695	Neonatal Death in Low- to Middle-Income Countries: A Global Network Study	AMERICAN JOURNAL OF PERINATOLOGY	23	18	Green OA article	Green OA	1	Belizan-JM	Belizan	Jose M.	Author	2	INST-CLIN-EFFECTIVENESS	INST-CLIN-EFFECTIVENESS	INST-CLIN-EFFECTIVENESS	Research institute	Research Institute	0	0	0	0	0	1	0	0	0	0	0	0	1	0	0	0	0	0	0	0	0	0	0	0	Article
48958120	Community-level correlates of intimate partner violence against women globally: A systematic review	SOCIAL SCIENCE & MEDICINE	4	3	Green OA article	Green OA	1	VanderEnde-KE	VanderEnde	Kristin E.	Author, Reprint Author	1	EMORY-UNIV	EMORY-UNIV	EMORY-UNIV	University	University - Rank 051-100	0	0	0	0	0	1	0	0	0	0	0	0	0	0	0	0	1	0	0	0	0	1	0	0	Review
48962735	The Global Role of Kidney Transplantation	NEPHRON CLINICAL PRACTICE	3	4	Hybrid article	Hybrid	1	Garcia-GG	Garcia Garcia	Guillermo	Author, Reprint Author	1	UNIV-GUADALAJARA-HLTH-SCI-CTR-CUCS-HOSP	UNIV-GUADALAJARA	UNIV-GUADALAJARA-HLTH-SCI-CTR-CUCS-HOSP	Hospital	Hospital	0	3095.1	0	0	0	0	1	0	0	0	1	0	0	0	0	0	0	0	0	0	0	0	0	1	Article
48970746	Nurses' potential to lead in non-communicable disease global crisis	INTERNATIONAL NURSING REVIEW	4	4	Toll access article	Toll access	1	DeCola-P	DeCola	P.	Author, Reprint Author	1	PFIZER-INC	PFIZER-INC	PFIZER-INC	Company	Company	0	0	0	0	0	0	0	1	1	0	0	0	0	0	0	0	0	0	0	0	0	0	0	0	Article
48974615	Development assistance for global tobacco control	TOBACCO CONTROL	2	1	Green OA article	Green OA	1	Ross-H	Ross	Hana	Author, Reprint Author	1	AMER-CANC-SOC	AMER-CANC-SOC	AMER-CANC-SOC	Scientific association	Scientific association	0	0	0	0	0	1	0	0	0	0	0	0	0	1	0	0	0	0	0	0	0	0	0	0	Article
48980313	Global public health leadership for the twenty-first century: Towards improved health of all populations	GLOBAL PUBLIC HEALTH	5	4	Toll access article	Toll access	1	Fried-LP	Fried	Linda P.	Author, Reprint Author	1	COLUMBIA-UNIV	COLUMBIA-UNIV	COLUMBIA-UNIV	University	University - Rank 001-025	0	0	0	0	0	0	0	1	0	0	0	0	0	0	1	0	0	0	0	0	0	1	1	0	Article
48980314	Mapping the key issues shaping the landscape of global public health	GLOBAL PUBLIC HEALTH	3	3	Toll access article	Toll access	1	Ager-A	Ager	Alastair	Author, Reprint Author	1	COLUMBIA-UNIV	COLUMBIA-UNIV	COLUMBIA-UNIV	University	University - Rank 001-025	0	0	0	0	0	0	0	1	0	0	0	0	0	0	1	0	0	0	0	0	0	1	1	0	Article
48980315	Changing care and prevention needs for global public health: In pursuit of a comprehensive perspective	GLOBAL PUBLIC HEALTH	2	2	Toll access article	Toll access	1	Caceres-CF	Caceres	Carlos F.	Author, Reprint Author	1	CAYETANO-HEREDIA-UNIV	CAYETANO-HEREDIA-UNIV	CAYETANO-HEREDIA-UNIV	University	University: Unranked	0	0	0	0	0	0	0	1	0	0	0	0	0	0	0	0	0	0	0	0	1	1	0	0	Article
48980318	Health systems and health equity: The challenge of the decade	GLOBAL PUBLIC HEALTH	2	4	Toll access article	Toll access	1	Jacobs-M	Jacobs	Marian	Author, Reprint Author	1	UNIV-CAPE-TOWN	UNIV-CAPE-TOWN	UNIV-CAPE-TOWN	University	University - Rank 101-200	0	0	0	0	0	0	0	1	0	0	0	0	0	0	0	0	0	1	0	0	0	1	0	0	Article
48980319	Knowledge networks for global public health	GLOBAL PUBLIC HEALTH	3	1	Toll access article	Toll access	1	Natividad-MDF	Natividad	Maria Dulce F.	Author, Reprint Author	1	COLUMBIA-UNIV	COLUMBIA-UNIV	COLUMBIA-UNIV	University	University - Rank 001-025	0	0	0	0	0	0	0	1	0	0	0	0	0	0	1	0	0	0	0	0	0	1	1	0	Article
48980888	GLOBAL HEALTH AND NEONATAL NURSING: A PERSONAL JOURNEY	MCN-THE AMERICAN JOURNAL OF MATERNAL-CHILD NURSING	2	2	Toll access article	Toll access	1	Kenner-C	Kenner	Carole	Author, Reprint Author	1	NORTHEASTERN-UNIV	NORTHEASTERN-UNIV	NORTHEASTERN-UNIV	University	University - Rank 101-200	0	0	0	0	0	0	0	1	0	0	0	0	0	0	0	0	0	1	0	0	0	1	0	0	Article
49061972	The global burden of cardiovascular disease	EUROPEAN JOURNAL OF CARDIOVASCULAR NURSING	6	8	Green OA article	Green OA	1	Deaton-C	Deaton	Christi	Author, Reprint Author	1	UNIV-MANCHESTER	UNIV-MANCHESTER	UNIV-MANCHESTER	University	University - Rank 051-100	0	0	0	0	0	1	0	0	0	0	0	0	0	0	0	0	1	0	0	0	0	1	0	0	Article
49061973	Global cardiovascular disease prevention: A call to action for nursing Multilevel policies	EUROPEAN JOURNAL OF CARDIOVASCULAR NURSING	6	4	Toll access article	Toll access	1	Burke-LE	Burke	Lora E.	Author, Reprint Author	1	UNIV-PITTSBURGH	UNIV-PITTSBURGH	UNIV-PITTSBURGH	University	University - Rank 051-100	0	0	0	0	0	0	0	1	0	0	0	0	0	0	0	0	1	0	0	0	0	1	0	0	Article
49061974	A life course approach to cardiovascular disease prevention	EUROPEAN JOURNAL OF CARDIOVASCULAR NURSING	4	6	Green OA article	Green OA	1	Hayman-LL	Hayman	Laura L.	Author, Reprint Author	1	UNIV-MASSACHUSETTS	UNIV-MASSACHUSETTS	UNIV-MASSACHUSETTS	University	University - Rank 101-200	0	0	0	0	0	1	0	0	0	0	0	0	0	0	0	0	0	1	0	0	0	1	0	0	Article
49061975	Global cardiovascular disease prevention: A call to action for nursing Community-based and public health prevention initiatives	EUROPEAN JOURNAL OF CARDIOVASCULAR NURSING	6	7	Toll access article	Toll access	1	Fletcher-BJ	Fletcher	Barbara J.	Author, Reprint Author	1	UNIV-N-FLORIDA	UNIV-N-FLORIDA	UNIV-N-FLORIDA	University	University: Unranked	0	0	0	0	0	0	0	1	0	0	0	0	0	0	0	0	0	0	0	0	1	1	0	0	Article
49061976	Nurse-based models for cardiovascular disease prevention From research to clinical practice	EUROPEAN JOURNAL OF CARDIOVASCULAR NURSING	3	4	Toll access article	Toll access	1	Berra-K	Berra	Kathy	Author, Reprint Author	1	STANFORD-UNIV	STANFORD-UNIV	STANFORD-UNIV	University	University - Rank 001-025	0	0	0	0	0	0	0	1	0	0	0	0	0	0	1	0	0	0	0	0	0	1	1	0	Article
49074598	Global concepts of bladder pain syndrome (interstitial cystitis)	WORLD JOURNAL OF UROLOGY	3	3	Green OA article	Green OA	1	Nordling-J	Nordling	Jorgen	Author, Reprint Author	1	UNIV-COPENHAGEN	UNIV-COPENHAGEN	UNIV-COPENHAGEN	University	University - Rank 101-200	0	0	0	0	0	1	0	0	0	0	0	0	0	0	0	0	0	1	0	0	0	1	0	0	Article
49080525	International shortfall inequality in life expectancy in women and in men, 1950-2010	BULLETIN OF THE WORLD HEALTH ORGANIZATION	6	5	Gold OA article (non-APC)	Gold OA	1	Hosseinpoor-AR	Hosseinpoor	Ahmad Reza	Author, Reprint Author	1	WORLD-HLTH-ORG	WHO	WHO	Non-profit	Non-profit	0	0	0	0	1	0	0	0	0	0	0	1	0	0	0	0	0	0	0	0	0	0	0	0	Article
49113134	Essential Factors for the Development of a Residency Global Health Track	CLINICAL PEDIATRICS	5	3	Green OA article	Green OA	1	Campagna-AM	Campagna	Ann M.	Author, Reprint Author	1	UNIV-MINNESOTA	UNIV-MINNESOTA	UNIV-MINNESOTA	University	University - Rank 051-100	0	0	0	0	0	1	0	0	0	0	0	0	0	0	0	0	1	0	0	0	0	1	0	0	Article
49129359	Cancer Prevention for Global Health: A Report from the ASPO International Cancer Prevention Interest Group	CANCER EPIDEMIOLOGY BIOMARKERS & PREVENTION	4	4	Delayed OA article	Delayed OA	1	Braithwaite-D	Braithwaite	Dejana	Author, Reprint Author	1	UNIV-CALIF-SAN-FRANCISCO	UCSF	UCSF	University	University - Rank 001-025	0	0	1	0	0	0	0	0	0	0	0	0	0	0	1	0	0	0	0	0	0	1	1	0	Review
49146511	Student Objectives and Learning Experiences in a Global Health Elective	JOURNAL OF COMMUNITY HEALTH	3	4	Toll access article	Toll access	1	Holmes-D	Holmes	David	Author, Reprint Author	1	SUNY-BUFFALO	SUNY-BUFFALO	SUNY-BUFFALO	University	University - Rank 201-500	0	0	0	0	0	0	0	1	0	0	0	0	0	0	0	0	0	0	1	0	0	1	0	0	Article
49150150	A Unique Approach to Business Strategy as a Means to Enable Change in Global Healthcare: A Case Study	CLINICAL CHEMISTRY	2	1	Hybrid article	Hybrid	1	Mace-CR	Mace	Charles R.	Author	1	DIAGNOST-ALL-INC	DIAGNOST-ALL-INC	DIAGNOST-ALL-INC	Company	Company	0	3500	0	0	0	0	1	0	1	0	0	0	0	0	0	0	0	0	0	0	0	0	0	1	Article
49156666	Relevance of Latent TB Infection in Areas of High TB Prevalence	CHEST	3	2	Toll access article	Toll access	1	Sharma-SK	Sharma	Surendra K.	Author, Reprint Author	1	ALL-INDIA-INST-MED-SCI	ALL-INDIA-INST-MED-SCI	ALL-INDIA-INST-MED-SCI	University	University: Unranked	0	0	0	0	0	0	0	1	0	0	0	0	0	0	0	0	0	0	0	0	1	1	0	0	Article
49161214	Non-communicable diseases: Harnessing the current opportunities	SCANDINAVIAN JOURNAL OF PUBLIC HEALTH	6	1	Green OA article	Green OA	1	Sorensen-JB	Sorensen	Jane Brandt	Author, Reprint Author	1	UNIV-COPENHAGEN	UNIV-COPENHAGEN	UNIV-COPENHAGEN	University	University - Rank 101-200	1	0	0	0	0	1	0	0	0	0	0	0	0	0	0	0	0	1	0	0	0	1	0	0	Article
49163558	The prevalence of primary angle closure glaucoma in European derived populations: a systematic review	BRITISH JOURNAL OF OPHTHALMOLOGY	8	6	Green OA article	Green OA	1	Day-AC	Day	Alexander C.	Author, Reprint Author	1	UCL-INST-OPHTHALMOL	UCL	UCL	University	University - Rank 001-025	0	0	0	0	0	1	0	0	0	0	0	0	0	0	1	0	0	0	0	0	0	1	1	0	Review
49165082	Rebalancing brain drain: Exploring resource reallocation to address health worker migration and promote global health	HEALTH POLICY	2	4	Toll access article	Toll access	1	Mackey-TK	Mackey	Timothy Ken	Author, Reprint Author	1	CALIF-WESTERN-SCH-LAW	CALIF-WESTERN-SCH-LAW	CALIF-WESTERN-SCH-LAW	University	University: Unranked	0	0	0	0	0	0	0	1	0	0	0	0	0	0	0	0	0	0	0	0	1	1	0	0	Article
49166533	The Use of Herbal Medicine in Cancer-related Anorexia/Cachexia Treatment Around the World	CURRENT PHARMACEUTICAL DESIGN	3	2	Toll access article	Toll access	1	Cheng-KC	Cheng	Kai-Chun	Author, Reprint Author	1	KAGOSHIMA-UNIV	KAGOSHIMA-UNIV	KAGOSHIMA-UNIV	University	University: Unranked	0	0	0	0	0	0	0	1	0	0	0	0	0	0	0	0	0	0	0	0	1	1	0	0	Review
49194814	A perspective on the future public health practitioner	PERSPECTIVES IN PUBLIC HEALTH	5	3	Toll access article	Toll access	1	Hanlon-P	Hanlon	Phil	Author	1	UNIV-GLASGOW	UNIV-GLASGOW	UNIV-GLASGOW	University	University - Rank 051-100	0	0	0	0	0	0	0	1	0	0	0	0	0	0	0	0	1	0	0	0	0	1	0	0	Article
49209778	Epilepsy-associated stigma in Bolivia: A community-based study among the Guarani population An International League Against Epilepsy/International Bureau for Epilepsy/World Health Organization Global Campaign Against Epilepsy Regional Project	EPILEPSY & BEHAVIOR	12	7	Green OA article	Green OA	1	Bruno-E	Bruno	Elisa	Author	1	UNIV-CATANIA	UNIV-CATANIA	UNIV-CATANIA	University	University - Rank 501+	0	0	0	0	0	1	0	0	0	0	0	0	0	0	0	0	0	0	0	1	0	1	0	0	Article
49214283	SOCIAL CLASS, POLITICS, AND THE SPIRIT LEVEL: WHY INCOME INEQUALITY REMAINS UNEXPLAINED AND UNSOLVED	INTERNATIONAL JOURNAL OF HEALTH SERVICES	4	4	Toll access article	Toll access	1	Muntaner-C	Muntaner	Carles	Author	3	UNIV-TORONTO	UNIV-TORONTO	UNIV-TORONTO	University	University - Rank 001-025	0	0	0	0	0	0	0	1	0	0	0	0	0	0	1	0	0	0	0	0	0	1	1	0	Article
49214288	SPECULATION ON COMMODITIES FUTURES MARKETS AND DESTABILIZATION OF GLOBAL FOOD PRICES: EXPLORING THE CONNECTIONS	INTERNATIONAL JOURNAL OF HEALTH SERVICES	3	3	Green OA article	Green OA	1	Ghosh-J	Ghosh	Jayati	Author	3	JAWAHARLAL-NEHRU-UNIV	JAWAHARLAL-NEHRU-UNIV	JAWAHARLAL-NEHRU-UNIV	University	University: Unranked	0	0	0	0	0	1	0	0	0	0	0	0	0	0	0	0	0	0	0	0	1	1	0	0	Article
49217849	A review of the worldwide prevalence of vitiligo in children/adolescents and adults	INTERNATIONAL JOURNAL OF DERMATOLOGY	2	2	Toll access article	Toll access	1	Kruger-C	Krueger	Christian	Author	1	ERNST-MORITZ-ARNDT-UNIV-GREIFSWALD	UNIV-GREIFSWALD	UNIV-GREIFSWALD	University	University - Rank 201-500	0	0	0	0	0	0	0	1	0	0	0	0	0	0	0	0	0	0	1	0	0	1	0	0	Article
49237085	Developed-developing country partnerships: Benefits to developed countries?	GLOBALIZATION AND HEALTH	11	5	Gold OA article (APC)	Gold OA	1	Syed-SB	Syed	Shamsuzzoha B.	Author	1	WHO-HEADQUARTERS	WHO	WHO	Non-profit	Non-profit	0	2145	0	1	0	0	0	0	0	0	0	1	0	0	0	0	0	0	0	0	0	0	0	1	Review
49241063	Is the Asthma Epidemic Still Ascending?	CLINICS IN CHEST MEDICINE	2	2	Toll access article	Toll access	1	Baiz-N	Baiz	Nour	Author	1	INSERM	INSERM	INSERM	Government	Government	0	0	0	0	0	0	0	1	0	1	0	0	0	0	0	0	0	0	0	0	0	0	0	0	Article
49241348	Reducing maternal, newborn, and infant mortality globally: An integrated action agenda	INTERNATIONAL JOURNAL OF GYNECOLOGY & OBSTETRICS	4	1	Toll access article	Toll access	1	Bhutta-ZA	Bhutta	Zulfiqar A.	Author, Reprint Author	1	INT-PEDIAT-ASSOC	INT-PEDIAT-ASSOC	INT-PEDIAT-ASSOC	Non-profit	Non-profit	0	0	0	0	0	0	0	1	0	0	0	1	0	0	0	0	0	0	0	0	0	0	0	0	Article
49241349	FIGO Saving Mothers and Newborns Initiative 2006-2011	INTERNATIONAL JOURNAL OF GYNECOLOGY & OBSTETRICS	2	3	Toll access article	Toll access	1	Lalonde-AB	Lalonde	Andre B.	Author, Reprint Author	1	MCGILL-UNIV	MCGILL-UNIV	MCGILL-UNIV	University	University - Rank 026-050	0	0	0	0	0	0	0	1	0	0	0	0	0	0	0	1	0	0	0	0	0	1	1	0	Article
49245849	Defining and assessing evidence for the effectiveness of technical assistance in furthering global health	GLOBAL PUBLIC HEALTH	4	1	Green OA article	Green OA	1	West-GR	West	Gary R.	Author, Reprint Author	1	FHI-360	FHI-360	FHI-360	Non-profit	Non-profit	0	0	0	0	0	1	0	0	0	0	0	1	0	0	0	0	0	0	0	0	0	0	0	0	Article
49268024	Awareness of kidney diseases in general population and in high school students. Italian report for World Kidney Days 2010-2011	JOURNAL OF NEPHROLOGY	4	1	Green OA article	Green OA	1	Battaglia-Y	Battaglia	Y.	Author, Reprint Author	1	UNIV-NAPLES-FEDERICO-II	UNIV-NAPLES-FEDERICO-II	UNIV-NAPLES-FEDERICO-II	University	University - Rank 201-500	0	0	0	0	0	1	0	0	0	0	0	0	0	0	0	0	0	0	1	0	0	1	0	0	Article
49286725	Variation between countries in the frequency of diabetic ketoacidosis at first presentation of type 1 diabetes in children: a systematic review	DIABETOLOGIA	4	3	Green OA article	Green OA	1	UsherSmith-JA	Usher-Smith	J. A.	Author, Reprint Author	1	UNIV-CAMBRIDGE	UNIV-CAMBRIDGE	UNIV-CAMBRIDGE	University	University - Rank 001-025	0	0	0	0	0	1	0	0	0	0	0	0	0	0	1	0	0	0	0	0	0	1	1	0	Review
49291621	Psychopathic Traits in Females and Males across the Globe	BEHAVIORAL SCIENCES & THE LAW	5	2	Toll access article	Toll access	1	Neumann-CS	Neumann	Craig S.	Author, Reprint Author	1	UNIV-N-TEXAS	UNIV-N-TEXAS	UNIV-N-TEXAS	University	University: Unranked	0	0	0	0	0	0	0	1	0	0	0	0	0	0	0	0	0	0	0	0	1	1	0	0	Article
49329590	Global cost of correcting vision impairment from uncorrected refractive error	BULLETIN OF THE WORLD HEALTH ORGANIZATION	7	2	Gold OA article (non-APC)	Gold OA	1	Fricke-TR	Fricke	T. R.	Author	1	UNIV-NEW-S-WALES	UNIV-NEW-S-WALES	UNIV-NEW-S-WALES	University	University - Rank 051-100	0	0	0	0	1	0	0	0	0	0	0	0	0	0	0	0	1	0	0	0	0	1	0	0	Article
49333410	The association of asthma and wheezing with major depressive episodes: an analysis of 245 727 women and men from 57 countries	INTERNATIONAL JOURNAL OF EPIDEMIOLOGY	4	4	Hybrid article	Hybrid	1	Loerbroks-A	Loerbroks	Adrian	Author, Reprint Author	1	UNIV-HEIDELBERG	UNIV-HEIDELBERG	UNIV-HEIDELBERG-HOSP	Hospital	University - Rank 026-050	0	3200	0	0	0	0	1	0	0	0	0	0	0	0	0	1	0	0	0	0	0	1	1	1	Article
49335481	A symposium and workshop report from the Global Nutrition and Epidemiologic Transition Initiative: nutrition transition and the global burden of type 2 diabetes	BRITISH JOURNAL OF NUTRITION	7	3	Toll access article	Toll access	1	Mattei-J	Mattei	Josiemer	Author	1	HARVARD-UNIV	HARVARD-UNIV	HARVARD-UNIV	University	University - Rank 001-025	0	0	0	0	0	0	0	1	0	0	0	0	0	0	1	0	0	0	0	0	0	1	1	0	Article
49368576	Global health initiatives of US otolaryngology residency programs: 2011 global health initiatives survey results	LARYNGOSCOPE	2	1	Toll access article	Toll access	1	Volsky-PG	Volsky	Peter G.	Author, Reprint Author	1	EASTERN-VIRGINIA-MED-SCH	EASTERN-VIRGINIA-MED-SCH	EASTERN-VIRGINIA-MED-SCH	University	University: Unranked	0	0	0	0	0	0	0	1	0	0	0	0	0	0	0	0	0	0	0	0	1	1	0	0	Article
49407568	Global Burden of Human Brucellosis: A Systematic Review of Disease Frequency	PLOS NEGLECTED TROPICAL DISEASES	5	2	Gold OA article (APC)	Gold OA	1	Dean-AS	Dean	Anna S.	Author	1	SWISS-TROP-&-PUBL-HLTH-INST	SWISS-TROP-&-PUBL-HLTH-INST	SWISS-TROP-&-PUBL-HLTH-INST	Research institute	Research Institute	0	2250	0	1	0	0	0	0	0	0	0	0	1	0	0	0	0	0	0	0	0	0	0	1	Article
49416672	Global Efforts to Address Severe Acute Malnutrition	JOURNAL OF PEDIATRIC GASTROENTEROLOGY AND NUTRITION	8	7	Toll access article	Toll access	1	Uauy-R	Uauy	Ricardo	Author, Reprint Author	1	PONTIFICIA-UNIV-CATOLICA-CHILE	PONTIFICIA-UNIV-CATOLICA-CHILE	PONTIFICIA-UNIV-CATOLICA-CHILE	University	University - Rank 201-500	0	0	0	0	0	0	0	1	0	0	0	0	0	0	0	0	0	0	1	0	0	1	0	0	Article
49416673	The Economics of Health Care Delivery	JOURNAL OF PEDIATRIC GASTROENTEROLOGY AND NUTRITION	9	8	Green OA article	Green OA	1	Winter-HS	Winter	Harland S.	Author, Reprint Author	1	MASSACHUSETTS-GEN-HOSP	MASSACHUSETTS-GEN-HOSP	MASSACHUSETTS-GEN-HOSP	Hospital	Hospital	0	0	0	0	0	1	0	0	0	0	1	0	0	0	0	0	0	0	0	0	0	0	0	0	Article
49416675	World Perspective on Celiac Disease	JOURNAL OF PEDIATRIC GASTROENTEROLOGY AND NUTRITION	8	9	Toll access article	Toll access	1	Catassi-C	Catassi	Carlo	Author, Reprint Author	1	UNIV-POLITECN-MARCHE	UNIV-POLITECN-MARCHE	UNIV-POLITECN-MARCHE	University	University - Rank 201-500	0	0	0	0	0	0	0	1	0	0	0	0	0	0	0	0	0	0	1	0	0	1	0	0	Article
49416676	Viral Hepatitis in Children	JOURNAL OF PEDIATRIC GASTROENTEROLOGY AND NUTRITION	10	8	Green OA article	Green OA	1	Nel-E	Nel	Etienne	Author, Reprint Author	1	UNIV-STELLENBOSCH	UNIV-STELLENBOSCH	UNIV-STELLENBOSCH	University	University - Rank 201-500	0	0	0	0	0	1	0	0	0	0	0	0	0	0	0	0	0	0	1	0	0	1	0	0	Article
49422492	Global patterns of water intake: how intake data affect recommendations	NUTRITION REVIEWS	1	1	Toll access article	Toll access	1	Shirreffs-SM	Shirreffs	Susan M.	Author, Reprint Author	1	UNIV-LOUGHBOROUGH	UNIV-LOUGHBOROUGH	UNIV-LOUGHBOROUGH	University	University - Rank 201-500	1	0	0	0	0	0	0	1	0	0	0	0	0	0	0	0	0	0	1	0	0	1	0	0	Review
49445202	Transcatheter Aortic Valve Replacement for Degenerative Bioprosthetic Surgical Valves Results From the Global Valve-in-Valve Registry	CIRCULATION	28	26	Hybrid article	Hybrid	1	Dvir-D	Dvir	Danny	Author, Reprint Author	1	WASHINGTON-HOSP-CTR	GEORGE-WASHINGTON-UNIV	WASHINGTON-HOSP-CTR	Hospital	Hospital	0	4600	0	0	0	0	1	0	0	0	1	0	0	0	0	0	0	0	0	0	0	0	0	1	Article
49452194	International environmental and occupational health: From individual scientists to networked science Hubs	AMERICAN JOURNAL OF INDUSTRIAL MEDICINE	6	3	Green OA article	Green OA	1	Rosenthal-J	Rosenthal	Joshua	Author, Reprint Author	1	NIH	NIH	NIH	Government	Government	0	0	0	0	0	1	0	0	0	1	0	0	0	0	0	0	0	0	0	0	0	0	0	0	Article
49464537	Chronic non-communicable diseases: a global epidemic of the 21st century	LAEKNABLADID	2	2	Toll access article	Toll access	1	Andersen-K	Andersen	K.	Author, Reprint Author	1	UNIV-ICELAND	UNIV-ICELAND	UNIV-ICELAND	University	University - Rank 201-500	0	0	0	0	0	0	0	1	0	0	0	0	0	0	0	0	0	0	1	0	0	1	0	0	Article
49476167	Household Air Pollution Is a Major Avoidable Risk Factor for Cardiorespiratory Disease	CHEST	6	6	Toll access article	Toll access	1	Mortimer-K	Mortimer	Kevin	Author	2	UNIV-LIVERPOOL	UNIV-LIVERPOOL	UNIV-LIVERPOOL	University	University - Rank 101-200	0	0	0	0	0	0	0	1	0	0	0	0	0	0	0	0	0	1	0	0	0	1	0	0	Article
49490976	The Global Perspective on Irritable Bowel Syndrome: A Rome Foundation-World Gastroenterology Organisation Symposium	AMERICAN JOURNAL OF GASTROENTEROLOGY	3	5	Green OA article	Green OA	1	Sperber-AD	Sperber	Ami D.	Author, Reprint Author	1	TEL-AVIV-MED-CTR-&-SCH-MED	TEL-AVIV-UNIV	TEL-AVIV-UNIV-MED-CTR	Hospital	Hospital	0	0	0	0	0	1	0	0	0	0	1	0	0	0	0	0	0	0	0	0	0	0	0	0	Article
49495192	Use of contraceptive methods and contraceptive recommendations among health care providers actively involved in contraceptive counseling - results of an international survey in 10 countries	CONTRACEPTION	6	6	Toll access article	Toll access	1	GemzellDanielsson-K	Gemzell-Danielsson	Kristina	Author, Reprint Author	1	KAROLINSKA-INST	KAROLINSKA-INST	KAROLINSKA-INST	University	University - Rank 026-050	0	0	0	0	0	0	0	1	0	0	0	0	0	0	0	1	0	0	0	0	0	1	1	0	Article
49500082	Understanding the modes of transmission model of new HIV infection and its use in prevention planning	BULLETIN OF THE WORLD HEALTH ORGANIZATION	10	6	Gold OA article (non-APC)	Gold OA	1	Case-KK	Case	Kelsey K.	Author, Reprint Author	1	UNIV-LONDON-IMPERIAL-COLL-SCI-TECHNOL-&-MED	UNIV-LONDON-IMPERIAL-COLL-SCI-TECHNOL-&-MED	UNIV-LONDON-IMPERIAL-COLL-SCI-TECHNOL-&-MED	University	University - Rank 001-025	0	0	0	0	1	0	0	0	0	0	0	0	0	0	1	0	0	0	0	0	0	1	1	0	Article
49505696	Climate change adaptation: Where does global health fit in the agenda?	GLOBALIZATION AND HEALTH	2	1	Gold OA article (APC)	Gold OA	1	Bowen-KJ	Bowen	Kathryn J.	Author, Reprint Author	1	UNIV-MELBOURNE	UNIV-MELBOURNE	UNIV-MELBOURNE	University	University - Rank 026-050	0	2145	0	1	0	0	0	0	0	0	0	0	0	0	0	1	0	0	0	0	0	1	1	1	Review
49506288	Strengthening the quality agenda in health care in low- and middle-income countries: questions to consider	INTERNATIONAL JOURNAL FOR QUALITY IN HEALTH CARE	5	5	Hybrid article	Hybrid	1	Ruelas-E	Ruelas	Enrique	Author	2	NATL-ACAD-MED	NATL-ACAD-MED	NATL-ACAD-MED	Scientific association	Scientific association	0	2800	0	0	0	0	1	0	0	0	0	0	0	1	0	0	0	0	0	0	0	0	0	1	Article
49506289	Charting the way forward to better quality health care: how do we get there and what are the next steps? Recommendations from the Salzburg Global Seminar on making health care better in low- and middle-income economies	INTERNATIONAL JOURNAL FOR QUALITY IN HEALTH CARE	9	8	Hybrid article	Hybrid	1	Massoud-MR	Massoud	M. Rashad	Author	1	UNIV-RES-CO-LLC	UNIV-RES-CO-LLC	UNIV-RES-CO-LLC	Company	Company	0	2800	0	0	0	0	1	0	1	0	0	0	0	0	0	0	0	0	0	0	0	0	0	1	Article
49517995	Global burden of cancer in 2008: a systematic analysis of disability-adjusted life-years in 12 world regions	LANCET	7	3	Toll access article	Toll access	1	Soerjomataram-I	Soerjomataram	Isabelle	Author, Reprint Author	1	INT-AGCY-RES-CANC	INT-AGCY-RES-CANC	INT-AGCY-RES-CANC	Research institute	Research Institute	0	0	0	0	0	0	0	1	0	0	0	0	1	0	0	0	0	0	0	0	0	0	0	0	Article
49533942	The global cancer epidemic: opportunities for Canada in low- and middle-income countries	CANADIAN MEDICAL ASSOCIATION JOURNAL	13	26	Gold OA article (APC)	Gold OA	1	Ginsburg-OM	Ginsburg	Ophira M.	Author	3	UNIV-TORONTO	UNIV-TORONTO	UNIV-TORONTO	University	University - Rank 001-025	0	2365.28	0	1	0	0	0	0	0	0	0	0	0	0	1	0	0	0	0	0	0	1	1	1	Article
49538735	Socioeconomic inequalities in risk factors for non communicable diseases in low-income and middle-income countries: results from the World Health Survey	BMC PUBLIC HEALTH	9	6	Gold OA article (APC)	Gold OA	1	Hosseinpoor-AR	Hosseinpoor	Ahmad Reza	Author, Reprint Author	1	WHO	WHO	WHO	Non-profit	Non-profit	0	2145	0	1	0	0	0	0	0	0	0	1	0	0	0	0	0	0	0	0	0	0	0	1	Article
49543785	Syphilis in pregnancy in Tuscany, description of a case series from a global health perspective	JOURNAL OF MATERNAL-FETAL & NEONATAL MEDICINE	7	4	Toll access article	Toll access	1	Zammarchi-L	Zammarchi	Lorenzo	Author, Reprint Author	1	UNIV-FLORENCE	UNIV-FLORENCE	UNIV-FLORENCE	University	University - Rank 201-500	0	0	0	0	0	0	0	1	0	0	0	0	0	0	0	0	0	0	1	0	0	1	0	0	Article
49548165	Exploring the relationship between population density and maternal health coverage	BMC HEALTH SERVICES RESEARCH	4	2	Gold OA article (APC)	Gold OA	1	Hanlon-M	Hanlon	Michael	Author, Reprint Author	1	UNIV-WASHINGTON	UNIV-WASHINGTON	UNIV-WASHINGTON	University	University - Rank 026-050	0	2145	0	1	0	0	0	0	0	0	0	0	0	0	0	1	0	0	0	0	0	1	1	1	Article
49552308	Evidence-based medicine and the governance of pandemic influenza	GLOBAL PUBLIC HEALTH	1	2	Toll access article	Toll access	1	KamradtScott-A	Kamradt-Scott	Adam	Author, Reprint Author	1	UNIV-SYDNEY	UNIV-SYDNEY	UNIV-SYDNEY	University	University - Rank 051-100	1	0	0	0	0	0	0	1	0	0	0	0	0	0	0	0	1	0	0	0	0	1	0	0	Article
49552310	New life in old frames: HIV, development and the 'AIDS plus MDGs' approach	GLOBAL PUBLIC HEALTH	3	1	Green OA article	Green OA	1	Woodling-M	Woodling	Marie	Author	1	ABERYSTWYTH-UNIV	ABERYSTWYTH-UNIV	ABERYSTWYTH-UNIV	University	University - Rank 201-500	0	0	0	0	0	1	0	0	0	0	0	0	0	0	0	0	0	0	1	0	0	1	0	0	Article
49552313	Framing and global health governance: Key findings	GLOBAL PUBLIC HEALTH	2	3	Green OA article	Green OA	1	McInnes-C	McInnes	Colin	Author, Reprint Author	1	ABERYSTWYTH-UNIV	ABERYSTWYTH-UNIV	ABERYSTWYTH-UNIV	University	University - Rank 201-500	0	0	0	0	0	1	0	0	0	0	0	0	0	0	0	0	0	0	1	0	0	1	0	0	Article
49562878	The change in the epidemiological profile of maternal mortality in Chile will hinder the fulfillment of the Millennium 5th goal	REVISTA MEDICA DE CHILE	2	1	Gold OA article (APC)	Gold OA	1	Donoso-E	Donoso S	Enrique	Author, Reprint Author	1	PONTIFICIA-UNIV-CATOLICA-CHILE	PONTIFICIA-UNIV-CATOLICA-CHILE	PONTIFICIA-UNIV-CATOLICA-CHILE	University	University - Rank 201-500	0	100	0	1	0	0	0	0	0	0	0	0	0	0	0	0	0	0	1	0	0	1	0	1	Article
49569700	The gender gap in mobility: A global cross-sectional study	BMC PUBLIC HEALTH	5	3	Gold OA article (APC)	Gold OA	1	MechakraTahiri-SD	Mechakra-Tahiri	Samia Djemaa	Author	3	UNIV-MONTREAL	UNIV-MONTREAL	UNIV-MONTREAL	University	University - Rank 101-200	0	2145	0	1	0	0	0	0	0	0	0	0	0	0	0	0	0	1	0	0	0	1	0	1	Article
49570453	E-consultation for DSD: A global platform for access to expert advice	JOURNAL OF PEDIATRIC UROLOGY	5	5	Toll access article	Toll access	1	Drop-SLS	Drop	Stenvert L. S.	Author, Reprint Author	1	SOPHIA-CHILDRENS-UNIV-HOSP	SOPHIA-CHILDRENS-UNIV-HOSP	SOPHIA-CHILDRENS-UNIV-HOSP	Hospital	Hospital	0	0	0	0	0	0	0	1	0	0	1	0	0	0	0	0	0	0	0	0	0	0	0	0	Review
49585521	An analysis of GAVI, the Global Fund and World Bank support for human resources for health in developing countries	HEALTH POLICY AND PLANNING	5	5	Hybrid article	Hybrid	1	Vujicic-M	Vujicic	Marko	Author, Reprint Author	1	WORLD-BANK	WORLD-BANK	WORLD-BANK	Non-profit	Non-profit	0	2400	0	0	0	0	1	0	0	0	0	1	0	0	0	0	0	0	0	0	0	0	0	1	Article
49587627	Innovative financing for health: what is truly innovative?	LANCET	4	6	Toll access article	Toll access	1	Atun-R	Atun	Rifat	Author, Reprint Author	1	UNIV-LONDON-IMPERIAL-COLL-SCI-TECHNOL-&-MED	UNIV-LONDON-IMPERIAL-COLL-SCI-TECHNOL-&-MED	UNIV-LONDON-IMPERIAL-COLL-SCI-TECHNOL-&-MED	University	University - Rank 001-025	0	0	0	0	0	0	0	1	0	0	0	0	0	0	1	0	0	0	0	0	0	1	1	0	Article
49595630	Global Cardiovascular Risk Management in Primary Prevention	CURRENT VASCULAR PHARMACOLOGY	2	2	Toll access article	Toll access	1	Volpe-M	Volpe	Massimo	Author, Reprint Author	1	UNIV-ROMA-LA-SAPIENZA	UNIV-ROMA-LA-SAPIENZA	UNIV-ROMA-LA-SAPIENZA	University	University - Rank 201-500	1	0	0	0	0	0	0	1	0	0	0	0	0	0	0	0	0	0	1	0	0	1	0	0	Article
49603530	The Global Burden of Atrial Fibrillation and Stroke A Systematic Review of the Epidemiology of Atrial Fibrillation in Regions Outside North America and Europe	CHEST	3	2	Toll access article	Toll access	1	Lip-GYH	Lip	Gregory Y. H.	Author, Reprint Author	1	UNIV-BIRMINGHAM	UNIV-BIRMINGHAM	UNIV-BIRMINGHAM	University	University - Rank 101-200	0	0	0	0	0	0	0	1	0	0	0	0	0	0	0	0	0	1	0	0	0	1	0	0	Article
49610474	Age-specific and sex-specific mortality in 187 countries, 1970-2010: a systematic analysis for the Global Burden of Disease Study 2010	LANCET	9	2	Toll access article	Toll access	1	Wang-HD	Wang	Haidong	Author, Reprint Author	1	UNIV-WASHINGTON	UNIV-WASHINGTON	UNIV-WASHINGTON	University	University - Rank 026-050	0	0	0	0	0	0	0	1	0	0	0	0	0	0	0	1	0	0	0	0	0	1	1	0	Article
49610475	Global and regional mortality from 235 causes of death for 20 age groups in 1990 and 2010: a systematic analysis for the Global Burden of Disease Study 2010	LANCET	189	119	Toll access article	Toll access	1	Lozano-R	Lozano	Rafael	Author	1	UNIV-WASHINGTON	UNIV-WASHINGTON	UNIV-WASHINGTON	University	University - Rank 026-050	0	0	0	0	0	0	0	1	0	0	0	0	0	0	0	1	0	0	0	0	0	1	1	0	Article
49610477	Healthy life expectancy for 187 countries, 1990-2010: a systematic analysis for the Global Burden Disease Study 2010	LANCET	7	3	Toll access article	Toll access	1	Salomon-JA	Salomon	Joshua A.	Author, Reprint Author	1	HARVARD-UNIV	HARVARD-UNIV	HARVARD-UNIV	University	University - Rank 001-025	0	0	0	0	0	0	0	1	0	0	0	0	0	0	1	0	0	0	0	0	0	1	1	0	Article
49610478	Years lived with disability (YLDs) for 1160 sequelae of 289 diseases and injuries 1990-2010: a systematic analysis for the Global Burden of Disease Study 2010	LANCET	355	197	Green OA article	Green OA	1	Vos-T	Vos	Theo	Author	2	UNIV-QUEENSLAND	UNIV-QUEENSLAND	UNIV-QUEENSLAND	University	University - Rank 051-100	0	0	0	0	0	1	0	0	0	0	0	0	0	0	0	0	1	0	0	0	0	1	0	0	Article
49610479	Disability-adjusted life years (DALYs) for 291 diseases and injuries in 21 regions, 1990-2010: a systematic analysis for the Global Burden of Disease Study 2010	LANCET	359	196	Toll access article	Toll access	1	Murray-CJL	Murray	Christopher J. L.	Author, Reprint Author	5	UNIV-WASHINGTON	UNIV-WASHINGTON	UNIV-WASHINGTON	University	University - Rank 026-050	0	0	0	0	0	0	0	1	0	0	0	0	0	0	0	1	0	0	0	0	0	1	1	0	Article
49610480	A comparative risk assessment of burden of disease and injury attributable to 67 risk factors and risk factor clusters in 21 regions, 1990-2010: a systematic analysis for the Global Burden of Disease Study 2010	LANCET	207	118	Green OA article	Green OA	1	Lim-SS	Lim	Stephen S.	Author, Reprint Author	1	UNIV-WASHINGTON	UNIV-WASHINGTON	UNIV-WASHINGTON	University	University - Rank 026-050	0	0	0	0	0	1	0	0	0	0	0	0	0	0	0	1	0	0	0	0	0	1	1	0	Article
49619745	Promoting global health: utilizing WHO to integrate public health, innovation and intellectual property	DRUG DISCOVERY TODAY	2	4	Toll access article	Toll access	1	Mackey-TK	Mackey	Tim K.	Author, Reprint Author	1	CALIF-WESTERN-SCH-LAW	CALIF-WESTERN-SCH-LAW	CALIF-WESTERN-SCH-LAW	University	University: Unranked	0	0	0	0	0	0	0	1	0	0	0	0	0	0	0	0	0	0	0	0	1	1	0	0	Review
49622015	Obesity and cancer risk: evidence, mechanisms, and recommendations	ANNALS OF THE NEW YORK ACADEMY OF SCIENCES	2	3	Green OA article	Green OA	1	Vucenik-I	Vucenik	Ivana	Author, Reprint Author	1	UNIV-MARYLAND	UNIV-MARYLAND	UNIV-MARYLAND	University	University - Rank 051-100	0	0	0	0	0	1	0	0	0	0	0	0	0	0	0	0	1	0	0	0	0	1	0	0	Article
49626351	A New Air Quality Perception Scale for Global Assessment of Air Pollution Health Effects	RISK ANALYSIS	4	3	Toll access article	Toll access	1	Deguen-S	Deguen	Severine	Author, Reprint Author	1	IRSET	IRSET	IRSET	Research institute	Research Institute	0	0	0	0	0	0	0	1	0	0	0	0	1	0	0	0	0	0	0	0	0	0	0	0	Article
49627663	Promoting Global Cardiovascular and Cerebrovascular Health	MOUNT SINAI JOURNAL OF MEDICINE	3	3	Toll access article	Toll access	1	Fuster-V	Fuster	Valentin	Author	2	MT-SINAI-MED-CTR	MT-SINAI-MED-CTR	MT-SINAI-MED-CTR	Hospital	Hospital	0	0	0	0	0	0	0	1	0	0	1	0	0	0	0	0	0	0	0	0	0	0	0	0	Article
49627664	Recognizing Global Burden of Cardiovascular Disease and Related Chronic Diseases	MOUNT SINAI JOURNAL OF MEDICINE	3	3	Toll access article	Toll access	1	Kelly-BB	Kelly	Bridget B.	Author, Reprint Author	1	NATL-ACAD	NATL-ACAD	NATL-ACAD	Scientific association	Scientific association	0	0	0	0	0	0	0	1	0	0	0	0	0	1	0	0	0	0	0	0	0	0	0	0	Article
49627846	FDI Vision 2020: shaping the future of oral health	INTERNATIONAL DENTAL JOURNAL	9	7	Green OA article	Green OA	1	Glick-M	Glick	Michael	Author	2	SUNY-BUFFALO	SUNY-BUFFALO	SUNY-BUFFALO	University	University - Rank 201-500	0	0	0	0	0	1	0	0	0	0	0	0	0	0	0	0	0	0	1	0	0	1	0	0	Article
49631702	The International Health Partnership Plus: rhetoric or real change? Results of a self-reported survey in the context of the 4th high level forum on aid effectiveness in Busan	GLOBALIZATION AND HEALTH	5	3	Gold OA article (APC)	Gold OA	1	Shorten-T	Shorten	Tim	Author, Reprint Author	1	LYMEHOUSE-STUDIOS	LYMEHOUSE-STUDIOS	LYMEHOUSE-STUDIOS	Company	Company	0	2145	0	1	0	0	0	0	1	0	0	0	0	0	0	0	0	0	0	0	0	0	0	1	Article
49631703	Crossing the quality chasm in resource-limited settings	GLOBALIZATION AND HEALTH	10	8	Gold OA article (APC)	Gold OA	1	Maru-DSR	Maru	Duncan Smith-Rohrberg	Author, Reprint Author	1	BAYALPATA-HOSP	BAYALPATA-HOSP	BAYALPATA-HOSP	Hospital	Hospital	0	2145	0	1	0	0	0	0	0	0	1	0	0	0	0	0	0	0	0	0	0	0	0	1	Review
49631913	A Survey Of Primary Care Doctors In Ten Countries Shows Progress In Use Of Health Information Technology, Less In Other Areas	HEALTH AFFAIRS	7	2	Delayed OA article	Delayed OA	1	Schoen-C	Schoen	Cathy	Author, Reprint Author	1	COMMONWEALTH-FUND	COMMONWEALTH-FUND	COMMONWEALTH-FUND	Non-profit	Non-profit	0	0	1	0	0	0	0	0	0	0	0	1	0	0	0	0	0	0	0	0	0	0	0	0	Article
49635771	Care of the injured worldwide: trauma still the neglected disease of modern society	SCANDINAVIAN JOURNAL OF TRAUMA RESUSCITATION & EMERGENCY MEDICINE	4	4	Gold OA article (APC)	Gold OA	1	Sakran-JV	Sakran	Joseph V.	Author, Reprint Author	1	MED-UNIV-S-CAROLINA	MED-UNIV-S-CAROLINA	MED-UNIV-S-CAROLINA	University	University: Unranked	0	2325	0	1	0	0	0	0	0	0	0	0	0	0	0	0	0	0	0	0	1	1	0	1	Review
49636272	World Medical Leaders Declare that Pain Treatment Is a Human Right ... and It Couldn't Come at a Worse Time	PAIN MEDICINE	1	2	Hybrid article	Hybrid	1	Lema-MJ	Lema	Mark J.	Author, Reprint Author	1	ROSWELL-PK-CANC-INST	ROSWELL-PK-CANC-INST	ROSWELL-PK-CANC-INST	Hospital	Hospital	1	3000	0	0	0	0	1	0	0	0	1	0	0	0	0	0	0	0	0	0	0	0	0	1	Article
49637515	Leprosy frequency in the world, 1999-2010	MEMORIAS DO INSTITUTO OSWALDO CRUZ	2	2	Gold OA article (non-APC)	Gold OA	1	Penna-MLF	Fernandes Penna	Maria Lucia	Author, Reprint Author	1	UNIV-FED-FLUMINENSE	UNIV-FED-FLUMINENSE	UNIV-FED-FLUMINENSE	University	University - Rank 501+	0	0	0	0	1	0	0	0	0	0	0	0	0	0	0	0	0	0	0	1	0	1	0	0	Article
49658247	Progress toward Global Reduction in Under-Five Mortality: A Bootstrap Analysis of Uncertainty in Millennium Development Goal 4 Estimates	PLOS MEDICINE	2	2	Gold OA article (APC)	Gold OA	1	Alkema-L	Alkema	Leontine	Author, Reprint Author	1	NATL-UNIV-SINGAPORE	NATL-UNIV-SINGAPORE	NATL-UNIV-SINGAPORE	University	University - Rank 001-025	0	2900	0	1	0	0	0	0	0	0	0	0	0	0	1	0	0	0	0	0	0	1	1	1	Article
49658248	National, Regional, and Global Trends in Infertility Prevalence Since 1990: A Systematic Analysis of 277 Health Surveys	PLOS MEDICINE	5	5	Gold OA article (APC)	Gold OA	1	Mascarenhas-MN	Mascarenhas	Maya N.	Author, Reprint Author	1	UNIV-CALIF-SAN-FRANCISCO	UCSF	UCSF	University	University - Rank 001-025	0	2900	0	1	0	0	0	0	0	0	0	0	0	0	1	0	0	0	0	0	0	1	1	1	Article
49669169	Data Resource Profile: United Nations Children's Fund (UNICEF)	INTERNATIONAL JOURNAL OF EPIDEMIOLOGY	2	1	Green OA article	Green OA	1	Murray-C	Murray	Colleen	Author, Reprint Author	1	UNITED-NATIONS-CHILDRENS-FUND	UNITED-NATIONS-CHILDRENS-FUND	UNITED-NATIONS-CHILDRENS-FUND	Non-profit	Non-profit	0	0	0	0	0	1	0	0	0	0	0	1	0	0	0	0	0	0	0	0	0	0	0	0	Article
49669170	Demographic and health surveys: a profile	INTERNATIONAL JOURNAL OF EPIDEMIOLOGY	4	2	Hybrid article	Hybrid	1	Corsi-DJ	Corsi	Daniel J.	Author	1	HARVARD-UNIV	HARVARD-UNIV	HARVARD-UNIV	University	University - Rank 001-025	0	3200	0	0	0	0	1	0	0	0	0	0	0	0	1	0	0	0	0	0	0	1	1	1	Article
49674515	The evolution of global health teaching in undergraduate medical curricula	GLOBALIZATION AND HEALTH	12	12	Gold OA article (APC)	Gold OA	1	Rowson-M	Rowson	Mike	Author, Reprint Author	1	UCL-INST-GLOBAL-HLTH	UCL	UCL	University	University - Rank 001-025	0	2145	0	1	0	0	0	0	0	0	0	0	0	0	1	0	0	0	0	0	0	1	1	1	Article
49678137	Progress on noise policies from 2008 to 2011	NOISE & HEALTH	3	3	Gold OA article (non-APC)	Gold OA	1	Finegold-L	Finegold	Lawrence	Author	1	FINEGOLD-&-SO-CONSULTANTS	FINEGOLD-&-SO-CONSULTANTS	FINEGOLD-&-SO-CONSULTANTS	Company	Company	0	0	0	0	1	0	0	0	1	0	0	0	0	0	0	0	0	0	0	0	0	0	0	0	Article
49678138	Combined Exposures: An update from the International comission on biological effects of noise	NOISE & HEALTH	2	2	Gold OA article (non-APC)	Gold OA	1	Leroux-T	Leroux	Tony	Author, Reprint Author	1	UNIV-MONTREAL	UNIV-MONTREAL	UNIV-MONTREAL	University	University - Rank 101-200	0	0	0	0	1	0	0	0	0	0	0	0	0	0	0	0	0	1	0	0	0	1	0	0	Article
49688514	International trends in the incidence of malignant melanoma 1953-2008uare recent generations at higher or lower risk?	INTERNATIONAL JOURNAL OF CANCER	7	6	Hybrid article	Hybrid	1	Erdmann-F	Erdmann	Friederike	Author, Reprint Author	1	INT-AGCY-RES-CANC	INT-AGCY-RES-CANC	INT-AGCY-RES-CANC	Research institute	Research Institute	0	3000	0	0	0	0	1	0	0	0	0	0	1	0	0	0	0	0	0	0	0	0	0	1	Article
49695223	The role of intellectual property rights in treatment access: challenges and solutions	CURRENT OPINION IN HIV AND AIDS	2	3	Green OA article	Green OA	1	tHoen-E	't Hoen	Ellen	Author, Reprint Author	1	MED-PATENT-POOL-FDN	MED-PATENT-POOL-FDN	MED-PATENT-POOL-FDN	Non-profit	Non-profit	0	0	0	0	0	1	0	0	0	0	0	1	0	0	0	0	0	0	0	0	0	0	0	0	Review
49697568	Desirable attributes of vaccines for deployment in low-resource settings	JOURNAL OF PHARMACEUTICAL SCIENCES	2	1	Toll access article	Toll access	1	Chen-DX	Chen	Dexiang	Author, Reprint Author	1	PATH	PATH	PATH	Non-profit	Non-profit	0	0	0	0	0	0	0	1	0	0	0	1	0	0	0	0	0	0	0	0	0	0	0	0	Article
49701804	Obesity: The BIG issue	ACTA PHYSIOLOGICA	2	1	Toll access article	Toll access	1	Persson-PB	Persson	P. B.	Author, Reprint Author	1	CHARITE	CHARITE	CHARITE	Hospital	Hospital	0	0	0	0	0	0	0	1	0	0	1	0	0	0	0	0	0	0	0	0	0	0	0	0	Article
49705272	The potential impact of smoking control policies on future global smoking trends	TOBACCO CONTROL	3	1	Toll access article	Toll access	1	Mendez-D	Mendez	David	Author, Reprint Author	1	UNIV-MICHIGAN	UNIV-MICHIGAN	UNIV-MICHIGAN	University	University - Rank 001-025	0	0	0	0	0	0	0	1	0	0	0	0	0	0	1	0	0	0	0	0	0	1	1	0	Article
49712542	Type 2 diabetes and cardiovascular disease in women	DIABETOLOGIA	2	3	Green OA article	Green OA	1	Norhammar-A	Norhammar	A.	Author, Reprint Author	1	KAROLINSKA-UNIV-HOSP	KAROLINSKA-INST	KAROLINSKA-UNIV-HOSP	Hospital	Hospital	0	0	0	0	0	1	0	0	0	0	1	0	0	0	0	0	0	0	0	0	0	0	0	0	Review
49713396	Global patient safety and antiretroviral drugdrug interactions in the resource-limited setting	JOURNAL OF ANTIMICROBIAL CHEMOTHERAPY	7	5	Hybrid article	Hybrid	1	Seden-K	Seden	Kay	Author, Reprint Author	1	ROYAL-LIVERPOOL-&-BROADGREEN-UNIV-HOSP-TRUST	ROYAL-LIVERPOOL-&-BROADGREEN-UNIV-HOSP-TRUST	ROYAL-LIVERPOOL-&-BROADGREEN-UNIV-HOSP-TRUST	Hospital	Hospital	0	3200	0	0	0	0	1	0	0	0	1	0	0	0	0	0	0	0	0	0	0	0	0	1	Article
49718883	Structured Global Health Programs in US Medical Schools: A Web-Based Review of Certificates, Tracks, and Concentrations	ACADEMIC MEDICINE	4	2	Toll access article	Toll access	1	Peluso-MJ	Peluso	Michael J.	Author, Reprint Author	2	OFF-INT-MED-STUDENT-EDUC	YALE-UNIV	YALE-UNIV	University	University - Rank 001-025	0	0	0	0	0	0	0	1	0	0	0	0	0	0	1	0	0	0	0	0	0	1	1	0	Review
49718885	Competency-Based Curricula to Transform Global Health: Redesign With the End in Mind	ACADEMIC MEDICINE	6	3	Toll access article	Toll access	1	Pfeiffer-J	Pfeiffer	James	Author, Reprint Author	1	UNIV-WASHINGTON	UNIV-WASHINGTON	UNIV-WASHINGTON	University	University - Rank 026-050	0	0	0	0	0	0	0	1	0	0	0	0	0	0	0	1	0	0	0	0	0	1	1	0	Article
49727885	Skin Cancer Risks Avoided by the Montreal Protocol-Worldwide Modeling Integrating Coupled Climate-Chemistry Models with a Risk Model for UV	PHOTOCHEMISTRY AND PHOTOBIOLOGY	12	5	Green OA article	Green OA	1	vanDijk-A	van Dijk	Arjan	Author, Reprint Author	1	RIVM	RIVM	RIVM	Government	Government	0	0	0	0	0	1	0	0	0	1	0	0	0	0	0	0	0	0	0	0	0	0	0	0	Article
49790101	Global report on preterm birth and stillbirth (1 of 7): definitions, description of the burden and opportunities to improve data	BMC PREGNANCY AND CHILDBIRTH	5	5	Gold OA article (APC)	Gold OA	1	Lawn-JE	Lawn	Joy E.	Author	1	SAVING-NEWBORN-LIVES-SAVE-CHILDREN	SAVING-NEWBORN-LIVES-SAVE-CHILDREN	SAVING-NEWBORN-LIVES-SAVE-CHILDREN	Non-profit	Non-profit	0	2145	0	1	0	0	0	0	0	0	0	1	0	0	0	0	0	0	0	0	0	0	0	1	Review
49790102	Global report on preterm birth and stillbirth (2 of 7): discovery science	BMC PREGNANCY AND CHILDBIRTH	3	3	Gold OA article (APC)	Gold OA	1	Gravett-MG	Gravett	Michael G.	Author, Reprint Author	1	UNIV-WASHINGTON	UNIV-WASHINGTON	UNIV-WASHINGTON	University	University - Rank 026-050	0	2145	0	1	0	0	0	0	0	0	0	0	0	0	0	1	0	0	0	0	0	1	1	1	Review
49790105	Global report on preterm birth and stillbirth (5 of 7): advocacy barriers and opportunities	BMC PREGNANCY AND CHILDBIRTH	4	3	Gold OA article (APC)	Gold OA	1	Sather-M	Sather	Megan	Author	1	GMMB	GMMB	GMMB	Company	Company	0	2145	0	1	0	0	0	0	1	0	0	0	0	0	0	0	0	0	0	0	0	0	0	1	Review
49790107	Global report on preterm birth and stillbirth (7 of 7): mobilizing resources to accelerate innovative solutions (Global Action Agenda)	BMC PREGNANCY AND CHILDBIRTH	4	4	Gold OA article (APC)	Gold OA	1	Rubens-CE	Rubens	Craig E.	Author, Reprint Author	1	GLOBAL-ALLIANCE-PREVENT-PREMATUR-&-STILLBIRTH	GLOBAL-ALLIANCE-PREVENT-PREMATUR-&-STILLBIRTH	GLOBAL-ALLIANCE-PREVENT-PREMATUR-&-STILLBIRTH	Non-profit	Non-profit	0	2145	0	1	0	0	0	0	0	0	0	1	0	0	0	0	0	0	0	0	0	0	0	1	Review
49807454	Spirometric testing on World COPD Day	INTERNATIONAL JOURNAL OF CHRONIC OBSTRUCTIVE PULMONARY DISEASE	3	2	Gold OA article (APC)	Gold OA	1	GrzeticRomcevic-T	Grzetic-Romcevic	Tanja	Author, Reprint Author	1	HOSP-SEZANA	HOSP-SEZANA	HOSP-SEZANA	Hospital	Hospital	0	2310	0	1	0	0	0	0	0	0	1	0	0	0	0	0	0	0	0	0	0	0	0	1	Review
49810206	No Health without Mental Health: Challenges and Opportunities in Global Mental Health	AFRICAN JOURNAL OF PSYCHIATRY	2	3	Gold OA article (non-APC)	Gold OA	1	Saxena-S	Saxena	S.	Author	2	WORLD-HLTH-ORG	WHO	WHO	Non-profit	Non-profit	0	0	0	0	1	0	0	0	0	0	0	1	0	0	0	0	0	0	0	0	0	0	0	0	Review
49811856	Impact of socioeconomic gradients within and between countries on health of patients with rheumatoid arthritis (RA): Lessons from QUEST RA	BEST PRACTICE & RESEARCH IN CLINICAL RHEUMATOLOGY	4	5	Toll access article	Toll access	1	Putrik-P	Putrik	Polina	Author, Reprint Author	1	MAASTRICHT-UNIV	MAASTRICHT-UNIV	MAASTRICHT-UNIV	University	University - Rank 051-100	0	0	0	0	0	0	0	1	0	0	0	0	0	0	0	0	1	0	0	0	0	1	0	0	Article
49813271	Global Gender Disparities in Obesity: A Review	ADVANCES IN NUTRITION	2	2	Green OA article	Green OA	1	Kanter-R	Kanter	Rebecca	Author, Reprint Author	1	JOHNS-HOPKINS-BLOOMBERG-SCH-PUBL-HLTH	JOHNS-HOPKINS-UNIV	JOHNS-HOPKINS-UNIV	University	University - Rank 001-025	0	0	0	0	0	1	0	0	0	0	0	0	0	0	1	0	0	0	0	0	0	1	1	0	Review
49819092	Good veterinary governance: definition, measurement and challenges	REVUE SCIENTIFIQUE ET TECHNIQUE DE L OFFICE INTERNATIONAL DES EPIZOOTIES	3	3	Toll access article	Toll access	1	Msellati-L	Msellati	L.	Author, Reprint Author	1	WORLD-BANK	WORLD-BANK	WORLD-BANK	Non-profit	Non-profit	0	0	0	0	0	0	0	1	0	0	0	1	0	0	0	0	0	0	0	0	0	0	0	0	Article
49819093	Shaping veterinary health policies in a global and evolving context	REVUE SCIENTIFIQUE ET TECHNIQUE DE L OFFICE INTERNATIONAL DES EPIZOOTIES	2	1	Toll access article	Toll access	1	Evans-B	Evans	B.	Author, Reprint Author	1	CANADIAN-FOOD-INSPECT-AGCY	CANADIAN-FOOD-INSPECT-AGCY	CANADIAN-FOOD-INSPECT-AGCY	Government	Government	0	0	0	0	0	0	0	1	0	1	0	0	0	0	0	0	0	0	0	0	0	0	0	0	Article
49819102	Good governance in 'One Health' approaches	REVUE SCIENTIFIQUE ET TECHNIQUE DE L OFFICE INTERNATIONAL DES EPIZOOTIES	2	2	Green OA article	Green OA	1	Landford-J	Landford	J.	Author, Reprint Author	1	INT-DEV-CONSULTANCY	INT-DEV-CONSULTANCY	INT-DEV-CONSULTANCY	Company	Company	0	0	0	0	0	1	0	0	1	0	0	0	0	0	0	0	0	0	0	0	0	0	0	0	Article
49819104	Economic analysis and costing of animal health: a literature review of methods and importance	REVUE SCIENTIFIQUE ET TECHNIQUE DE L OFFICE INTERNATIONAL DES EPIZOOTIES	5	2	Toll access article	Toll access	1	Dehove-A	Dehove	A.	Author, Reprint Author	1	WORLD-ORG-ANIM-HLTH-OIE	WORLD-ORG-ANIM-HLTH	WORLD-ORG-ANIM-HLTH	Non-profit	Non-profit	0	0	0	0	0	0	0	1	0	0	0	1	0	0	0	0	0	0	0	0	0	0	0	0	Review
49819106	Initial assessment of strategic plans for improving the performance of Veterinary Services in developing countries: a review of OIE PVS Gap Analysis reports	REVUE SCIENTIFIQUE ET TECHNIQUE DE L OFFICE INTERNATIONAL DES EPIZOOTIES	4	3	Toll access article	Toll access	1	Weaver-J	Weaver	J.	Author, Reprint Author	1	UNITED-NATIONS-FAO	UNITED-NATIONS-FAO	UNITED-NATIONS-FAO	Non-profit	Non-profit	0	0	0	0	0	0	0	1	0	0	0	1	0	0	0	0	0	0	0	0	0	0	0	0	Review
49819107	Position paper: Improving governance for effective Veterinary Services in developing countries - a priority for donor funding	REVUE SCIENTIFIQUE ET TECHNIQUE DE L OFFICE INTERNATIONAL DES EPIZOOTIES	7	7	Toll access article	Toll access	1	Forman-S	Forman	S.	Author, Reprint Author	1	WORLD-BANK	WORLD-BANK	WORLD-BANK	Non-profit	Non-profit	0	0	0	0	0	0	0	1	0	0	0	1	0	0	0	0	0	0	0	0	0	0	0	0	Article
49819109	Financing for public Veterinary Services to ensure that they meet international standards	REVUE SCIENTIFIQUE ET TECHNIQUE DE L OFFICE INTERNATIONAL DES EPIZOOTIES	2	1	Toll access article	Toll access	1	Stemshorn-B	Stemshorn	B.	Author, Reprint Author	1	UNIV-OTTAWA	UNIV-OTTAWA	UNIV-OTTAWA	University	University - Rank 201-500	0	0	0	0	0	0	0	1	0	0	0	0	0	0	0	0	0	0	1	0	0	1	0	0	Article
49819110	Financing and organisation of Veterinary Services	REVUE SCIENTIFIQUE ET TECHNIQUE DE L OFFICE INTERNATIONAL DES EPIZOOTIES	2	2	Toll access article	Toll access	1	Gallacher-M	Gallacher	M.	Author, Reprint Author	1	UNIV-CEMA	UNIV-CEMA	UNIV-CEMA	University	University: Unranked	0	0	0	0	0	0	0	1	0	0	0	0	0	0	0	0	0	0	0	0	1	1	0	0	Article
49846569	Health 2020 - The New European Framework Strategy of WHO	GESUNDHEITSWESEN	2	1	Toll access article	Toll access	1	Michelsen-K	Michelsen	K.	Author, Reprint Author	1	MAASTRICHT-UNIV	MAASTRICHT-UNIV	MAASTRICHT-UNIV	University	University - Rank 051-100	0	0	0	0	0	0	0	1	0	0	0	0	0	0	0	0	1	0	0	0	0	1	0	0	Article
49849347	Health diplomacy the adaptation of global health interventions to local needs in sub-Saharan Africa and Thailand: evaluating findings from Project Accept (HPTN 043)	BMC PUBLIC HEALTH	17	10	Gold OA article (APC)	Gold OA	1	Kevany-S	Kevany	Sebastian	Author, Reprint Author	1	UNIV-CALIF-SAN-FRANCISCO	UCSF	UCSF	University	University - Rank 001-025	0	2145	0	1	0	0	0	0	0	0	0	0	0	0	1	0	0	0	0	0	0	1	1	1	Article
49849417	The internationalization of health: contextual elements and institutional frameworks of Brazilian cooperation	REVISTA PANAMERICANA DE SALUD PUBLICA-PAN AMERICAN JOURNAL OF PUBLIC HEALTH	3	2	Gold OA article (non-APC)	Gold OA	1	PiresAlves-FA	Pires-Alves	Fernando A.	Author	1	FUNDACAO-OSWALDO-CRUZ	FUNDACAO-OSWALDO-CRUZ	FUNDACAO-OSWALDO-CRUZ	Research institute	Research Institute	0	0	0	0	1	0	0	0	0	0	0	0	1	0	0	0	0	0	0	0	0	0	0	0	Article
49862870	Conceptualising global health: theoretical issues and their relevance for teaching	GLOBALIZATION AND HEALTH	10	10	Gold OA article (APC)	Gold OA	1	Rowson-M	Rowson	Mike	Author, Reprint Author	1	UCL-INST-GLOBAL-HLTH	UCL	UCL	University	University - Rank 001-025	0	2145	0	1	0	0	0	0	0	0	0	0	0	0	1	0	0	0	0	0	0	1	1	1	Article
49879914	Building global capacity for patient safety: A training program for surgical safety research in developing and transitional countries	INTERNATIONAL JOURNAL OF SURGERY	7	2	Hybrid article	Hybrid	1	Hull-L	Hull	Louise	Author, Reprint Author	1	UNIV-LONDON-IMPERIAL-COLL-SCI-TECHNOL-&-MED	UNIV-LONDON-IMPERIAL-COLL-SCI-TECHNOL-&-MED	UNIV-LONDON-IMPERIAL-COLL-SCI-TECHNOL-&-MED	University	University - Rank 001-025	0	3000	0	0	0	0	1	0	0	0	0	0	0	0	1	0	0	0	0	0	0	1	1	1	Article
49915915	Global challenges in pediatric oncology	CURRENT OPINION IN PEDIATRICS	4	2	Green OA article	Green OA	1	RodriguezGalindo-C	Rodriguez-Galindo	Carlos	Author, Reprint Author	1	HARVARD-UNIV	HARVARD-UNIV	HARVARD-UNIV	University	University - Rank 001-025	0	0	0	0	0	1	0	0	0	0	0	0	0	0	1	0	0	0	0	0	0	1	1	0	Review
49926774	A systematic review of the application and utility of geographical information systems for exploring disease-disease relationships in paediatric global health research: the case of anaemia and malaria	INTERNATIONAL JOURNAL OF HEALTH GEOGRAPHICS	3	3	Gold OA article (APC)	Gold OA	1	Aimone-AM	Aimone	Ashley Mariko	Author, Reprint Author	1	UNIV-TORONTO	UNIV-TORONTO	UNIV-TORONTO	University	University - Rank 001-025	0	2145	0	1	0	0	0	0	0	0	0	0	0	0	1	0	0	0	0	0	0	1	1	1	Review
49926994	The global burden of stroke and need for a continuum of care	NEUROLOGY	2	2	Toll access article	Toll access	1	Norrving-B	Norrving	Bo	Author, Reprint Author	1	LUND-UNIV	LUND-UNIV	LUND-UNIV	University	University - Rank 051-100	0	0	0	0	0	0	0	1	0	0	0	0	0	0	0	0	1	0	0	0	0	1	0	0	Article
49929701	Global Epidemiology of Psoriasis: A Systematic Review of Incidence and Prevalence	JOURNAL OF INVESTIGATIVE DERMATOLOGY	4	4	Toll access article	Toll access	1	Parisi-R	Parisi	Rosa	Author	1	UNIV-MANCHESTER	UNIV-MANCHESTER	UNIV-MANCHESTER	University	University - Rank 051-100	0	0	0	0	0	0	0	1	0	0	0	0	0	0	0	0	1	0	0	0	0	1	0	0	Review
49930688	Changing practice: Implications of the World Report on Disability for responding to communication disability in under-served populations	INTERNATIONAL JOURNAL OF SPEECH-LANGUAGE PATHOLOGY	4	3	Toll access article	Toll access	1	Wylie-K	Wylie	Karen	Author	1	UNIV-SYDNEY	UNIV-SYDNEY	UNIV-SYDNEY	University	University - Rank 051-100	0	0	0	0	0	0	0	1	0	0	0	0	0	0	0	0	1	0	0	0	0	1	0	0	Article
49930690	The World Report on Disability and communication disability: Some considerations from an Indian context	INTERNATIONAL JOURNAL OF SPEECH-LANGUAGE PATHOLOGY	2	2	Green OA article	Green OA	1	Goldbart-J	Goldbart	Juliet	Author, Reprint Author	1	MANCHESTER-METROPOLITAN-UNIV	MANCHESTER-METROPOLITAN-UNIV	MANCHESTER-METROPOLITAN-UNIV	University	University - Rank 501+	0	0	0	0	0	1	0	0	0	0	0	0	0	0	0	0	0	0	0	1	0	1	0	0	Article
49930691	Defining communication disability in under-served communities in response to the World Report on Disability	INTERNATIONAL JOURNAL OF SPEECH-LANGUAGE PATHOLOGY	2	2	Toll access article	Toll access	1	Roulstone-S	Roulstone	Sue	Author, Reprint Author	1	UNIV-W-ENGLAND	UNIV-W-ENGLAND	UNIV-W-ENGLAND	University	University - Rank 501+	0	0	0	0	0	0	0	1	0	0	0	0	0	0	0	0	0	0	0	1	0	1	0	0	Article
49930692	A perspective from Bolivia on the implications of the World Report on Disability for people with communication disabilities	INTERNATIONAL JOURNAL OF SPEECH-LANGUAGE PATHOLOGY	1	1	Green OA article	Green OA	1	Buell-S	Buell	Susan	Author, Reprint Author	1	UNIV-E-ANGLIA	UNIV-E-ANGLIA	UNIV-E-ANGLIA	University	University - Rank 101-200	1	0	0	0	0	1	0	0	0	0	0	0	0	0	0	0	0	1	0	0	0	1	0	0	Article
49930693	Addressing education of speech-language pathologists in the World Report on Disability: Development of a speech-language pathology program in Malaysia	INTERNATIONAL JOURNAL OF SPEECH-LANGUAGE PATHOLOGY	4	1	Green OA article	Green OA	1	Ahmad-K	Ahmad	Kartini	Author, Reprint Author	1	UNIV-KEBANGSAAN-MALAYSIA	UNIV-KEBANGSAAN-MALAYSIA	UNIV-KEBANGSAAN-MALAYSIA	University	University - Rank 501+	1	0	0	0	0	1	0	0	0	0	0	0	0	0	0	0	0	0	0	1	0	1	0	0	Article
49930694	The World Report on Disability in relation to the development of speech-language pathology in Viet Nam	INTERNATIONAL JOURNAL OF SPEECH-LANGUAGE PATHOLOGY	3	2	Green OA article	Green OA	1	Atherton-M	Marie Atherton		Author, Reprint Author	1	PHAM-NGOC-THACH-UNIV-MED	PHAM-NGOC-THACH-UNIV-MED	PHAM-NGOC-THACH-UNIV-MED	Hospital	Hospital	0	0	0	0	0	1	0	0	0	0	1	0	0	0	0	0	0	0	0	0	0	0	0	0	Article
49930695	Implementation of the World Report on Disability: Developing human resource capacity to meet the needs of people with communication disability in Uganda	INTERNATIONAL JOURNAL OF SPEECH-LANGUAGE PATHOLOGY	2	2	Green OA article	Green OA	1	Barrett-H	Barrett	Helen	Author	1	MAKERERE-UNIV	MAKERERE-UNIV	MAKERERE-UNIV	University	University - Rank 201-500	0	0	0	0	0	1	0	0	0	0	0	0	0	0	0	0	0	0	1	0	0	1	0	0	Article
49930696	Collaborations to address barriers for people with communication disabilities in Ghana: Considering the World Report on Disability	INTERNATIONAL JOURNAL OF SPEECH-LANGUAGE PATHOLOGY	9	5	Green OA article	Green OA	1	Crowley-C	Crowley	Catherine	Author, Reprint Author	1	COLUMBIA-UNIV	COLUMBIA-UNIV	COLUMBIA-UNIV	University	University - Rank 001-025	0	0	0	0	0	1	0	0	0	0	0	0	0	0	1	0	0	0	0	0	0	1	1	0	Article
49930697	A French-speaking speech-language pathology program in West Africa: Transfer of training between Minority and Majority World countries	INTERNATIONAL JOURNAL OF SPEECH-LANGUAGE PATHOLOGY	2	2	Green OA article	Green OA	1	Topouzkhanian-S	Topouzkhanian	Sylvia	Author, Reprint Author	1	CTR-HOSP-VINATIER	CTR-HOSP-VINATIER	CTR-HOSP-VINATIER	Hospital	Hospital	0	0	0	0	0	1	0	0	0	0	1	0	0	0	0	0	0	0	0	0	0	0	0	0	Article
49930698	Knowledge transfer between minority and majority world settings and its application to the World Report on Disability	INTERNATIONAL JOURNAL OF SPEECH-LANGUAGE PATHOLOGY	1	1	Toll access article	Toll access	1	Cheng-LRL	Cheng	Li-Rong Lilly	Author, Reprint Author	1	SAN-DIEGO-STATE-UNIV	SAN-DIEGO-STATE-UNIV	SAN-DIEGO-STATE-UNIV	University	University - Rank 201-500	1	0	0	0	0	0	0	1	0	0	0	0	0	0	0	0	0	0	1	0	0	1	0	0	Article
49930699	Responding to the World Report on Disability in Australia: Lessons from collaboration in an urban Aboriginal and Torres Strait Islander school	INTERNATIONAL JOURNAL OF SPEECH-LANGUAGE PATHOLOGY	3	3	Green OA article	Green OA	1	Davidson-B	Davidson	Bronwyn	Author, Reprint Author	1	UNIV-MELBOURNE	UNIV-MELBOURNE	UNIV-MELBOURNE	University	University - Rank 026-050	0	0	0	0	0	1	0	0	0	0	0	0	0	0	0	1	0	0	0	0	0	1	1	0	Article
49930700	Involving people with communication disability in research in Uganda: A response to the World Report on Disability	INTERNATIONAL JOURNAL OF SPEECH-LANGUAGE PATHOLOGY	4	1	Green OA article	Green OA	1	Jones-I	Jones	Isla	Author, Reprint Author	1	MANCHESTER-METROPOLITAN-UNIV	MANCHESTER-METROPOLITAN-UNIV	MANCHESTER-METROPOLITAN-UNIV	University	University - Rank 501+	1	0	0	0	0	1	0	0	0	0	0	0	0	0	0	0	0	0	0	1	0	1	0	0	Article
49930702	Promoting change through political consciousness: A South African speech-language pathology response to the World Report on Disability	INTERNATIONAL JOURNAL OF SPEECH-LANGUAGE PATHOLOGY	2	2	Green OA article	Green OA	1	Kathard-H	Kathard	Harsha	Author, Reprint Author	1	UNIV-CAPE-TOWN	UNIV-CAPE-TOWN	UNIV-CAPE-TOWN	University	University - Rank 101-200	0	0	0	0	0	1	0	0	0	0	0	0	0	0	0	0	0	1	0	0	0	1	0	0	Article
49930703	Implementing the World Report on Disability in Malaysia: A student-led service to promote knowledge and innovation	INTERNATIONAL JOURNAL OF SPEECH-LANGUAGE PATHOLOGY	4	2	Green OA article	Green OA	1	VanDort-S	Van Dort	Sandra	Author, Reprint Author	1	UNIV-KEBANGSAAN-MALAYSIA	UNIV-KEBANGSAAN-MALAYSIA	UNIV-KEBANGSAAN-MALAYSIA	University	University - Rank 501+	0	0	0	0	0	1	0	0	0	0	0	0	0	0	0	0	0	0	0	1	0	1	0	0	Article
49930704	Implementing recommendations of the World Report on Disability for indigenous populations	INTERNATIONAL JOURNAL OF SPEECH-LANGUAGE PATHOLOGY	1	1	Green OA article	Green OA	1	Westby-C	Westby	Carol	Author, Reprint Author	1	BILINGUAL-MULTICULTURAL-SERV	BILINGUAL-MULTICULTURAL-SERV	BILINGUAL-MULTICULTURAL-SERV	Government	Government	1	0	0	0	0	1	0	0	0	1	0	0	0	0	0	0	0	0	0	0	0	0	0	0	Article
49930706	The World Report on Disability as a blueprint for international, national, and local aphasia services	INTERNATIONAL JOURNAL OF SPEECH-LANGUAGE PATHOLOGY	11	4	Green OA article	Green OA	1	Worrall-LE	Worrall	Linda E.	Author, Reprint Author	1	UNIV-QUEENSLAND	UNIV-QUEENSLAND	UNIV-QUEENSLAND	University	University - Rank 051-100	0	0	0	0	0	1	0	0	0	0	0	0	0	0	0	0	1	0	0	0	0	1	0	0	Article
49930707	Implications of the World Report on Disability for responding to communication disorders in Brazil	INTERNATIONAL JOURNAL OF SPEECH-LANGUAGE PATHOLOGY	2	2	Green OA article	Green OA	1	Fernandes-FDM	Fernandes	Fernanda Dreux M.	Author, Reprint Author	1	UNIV-SAO-PAULO	UNIV-SAO-PAULO	UNIV-SAO-PAULO	University	University - Rank 201-500	0	0	0	0	0	1	0	0	0	0	0	0	0	0	0	0	0	0	1	0	0	1	0	0	Article
49930708	The World Report on Disability: An impetus to reconceptualize services for people with communication disability	INTERNATIONAL JOURNAL OF SPEECH-LANGUAGE PATHOLOGY	4	3	Toll access article	Toll access	1	Mcallister-L	Mcallister	Lindy	Author, Reprint Author	1	UNIV-SYDNEY	UNIV-SYDNEY	UNIV-SYDNEY	University	University - Rank 051-100	0	0	0	0	0	0	0	1	0	0	0	0	0	0	0	0	1	0	0	0	0	1	0	0	Article
49932332	Restructuring brain drain: strengthening governance and financing for health worker migration	GLOBAL HEALTH ACTION	2	4	Gold OA article (APC)	Gold OA	1	Mackey-TK	Mackey	Tim K.	Author, Reprint Author	1	SAN-DIEGO-STATE-UNIV	SAN-DIEGO-STATE-UNIV	SAN-DIEGO-STATE-UNIV	University	University - Rank 201-500	0	1500	0	1	0	0	0	0	0	0	0	0	0	0	0	0	0	0	1	0	0	1	0	1	Article
49932493	A review of global cancer burden: Trends, challenges, strategies, and a role for surgeons	JOURNAL OF SURGICAL ONCOLOGY	11	11	Green OA article	Green OA	1	Are-C	Are	Chandrakanth	Author, Reprint Author	1	UNIV-NEBRASKA-MED-CTR	UNIV-NEBRASKA-OMAHA	UNIV-NEBRASKA-MED-CTR	Hospital	Hospital	0	0	0	0	0	1	0	0	0	0	1	0	0	0	0	0	0	0	0	0	0	0	0	0	Review
49933393	Scientific Publications and Research Groups on Alcohol Consumption and Related Problems Worldwide: Authorship Analysis of Papers Indexed in PubMed and Scopus Databases (2005 to 2009)	ALCOHOLISM-CLINICAL AND EXPERIMENTAL RESEARCH	7	7	Toll access article	Toll access	1	GonzalezAlcaide-G	Gonzalez-Alcaide	Gregorio	Author	1	UNIDAD-INVEST-SOCIAL-&-SANIT	UNIDAD-INVEST-SOCIAL-&-SANIT	UNIDAD-INVEST-SOCIAL-&-SANIT	Non-profit	Non-profit	0	0	0	0	0	0	0	1	0	0	0	1	0	0	0	0	0	0	0	0	0	0	0	0	Article
49957986	A United Nations Global Health Panel for Global Health Governance	SOCIAL SCIENCE & MEDICINE	2	4	Toll access article	Toll access	1	Mackey-TK	Mackey	Tim K.	Author, Reprint Author	1	CALIF-WESTERN-SCH-LAW	CALIF-WESTERN-SCH-LAW	CALIF-WESTERN-SCH-LAW	University	University: Unranked	0	0	0	0	0	0	0	1	0	0	0	0	0	0	0	0	0	0	0	0	1	1	0	0	Article
49965373	The worldwide economic impact of dementia 2010	ALZHEIMERS & DEMENTIA	5	6	Green OA article	Green OA	1	Wimo-A	Wimo	Anders	Author, Reprint Author	1	KAROLINSKA-INST	KAROLINSKA-INST	KAROLINSKA-INST	University	University - Rank 026-050	0	0	0	0	0	1	0	0	0	0	0	0	0	0	0	1	0	0	0	0	0	1	1	0	Article
49965380	The global prevalence of dementia: A systematic review and metaanalysis	ALZHEIMERS & DEMENTIA	6	5	Green OA article	Green OA	1	Prince-M	Prince	Martin	Author, Reprint Author	1	KINGS-COLL-LONDON	KINGS-COLL-LONDON	KINGS-COLL-LONDON	University	University - Rank 026-050	0	0	0	0	0	1	0	0	0	0	0	0	0	0	0	1	0	0	0	0	0	1	1	0	Review
49969161	Global and regional hearing impairment prevalence: an analysis of 42 studies in 29 countries	EUROPEAN JOURNAL OF PUBLIC HEALTH	6	4	Hybrid article	Hybrid	1	Stevens-G	Stevens	Gretchen	Author, Reprint Author	1	WHO	WHO	WHO	Non-profit	Non-profit	0	2400	0	0	0	0	1	0	0	0	0	1	0	0	0	0	0	0	0	0	0	0	0	1	Article
49976789	Are marine environmental pollutants influencing global patterns of human disease?	MARINE ENVIRONMENTAL RESEARCH	4	2	Toll access article	Toll access	1	Depledge-MH	Depledge	M. H.	Author, Reprint Author	1	UNIV-EXETER	UNIV-EXETER	UNIV-EXETER	University	University - Rank 101-200	0	0	0	0	0	0	0	1	0	0	0	0	0	0	0	0	0	1	0	0	0	1	0	0	Article
49981866	The World Health Organization's work on adolescent sexual and reproductive health	BUNDESGESUNDHEITSBLATT-GESUNDHEITSFORSCHUNG-GESUNDHEITSSCHUTZ	3	3	Green OA article	Green OA	1	ChandraMouli-V	Chandra-Mouli	V.	Author, Reprint Author	1	WORLD-HLTH-ORG	WHO	WHO	Non-profit	Non-profit	0	0	0	0	0	1	0	0	0	0	0	1	0	0	0	0	0	0	0	0	0	0	0	0	Article
49982302	Global variation in the prevalence and incidence of major depressive disorder: a systematic review of the epidemiological literature	PSYCHOLOGICAL MEDICINE	7	5	Green OA article	Green OA	1	Ferrari-AJ	Ferrari	A. J.	Author, Reprint Author	1	UNIV-QUEENSLAND	UNIV-QUEENSLAND	UNIV-QUEENSLAND	University	University - Rank 051-100	0	0	0	0	0	1	0	0	0	0	0	0	0	0	0	0	1	0	0	0	0	1	0	0	Review
49986550	High fructose corn syrup and diabetes prevalence: A global perspective	GLOBAL PUBLIC HEALTH	3	2	Toll access article	Toll access	1	Goran-MI	Goran	Michael I.	Author, Reprint Author	1	UNIV-SO-CALIF	UNIV-SO-CALIF	UNIV-SO-CALIF	University	University - Rank 051-100	0	0	0	0	0	0	0	1	0	0	0	0	0	0	0	0	1	0	0	0	0	1	0	0	Article
49986554	The biomarket	GLOBAL PUBLIC HEALTH	2	1	Toll access article	Toll access	1	Maruthappu-M	Maruthappu	Mahiben	Author, Reprint Author	1	HARVARD-UNIV	HARVARD-UNIV	HARVARD-UNIV	University	University - Rank 001-025	0	0	0	0	0	0	0	1	0	0	0	0	0	0	1	0	0	0	0	0	0	1	1	0	Article
49991651	Inclusive Domestic Violence Standards: Strategies to Improve Interventions for Women With Disabilities?	VIOLENCE AND VICTIMS	3	2	Green OA article	Green OA	1	Healey-L	Healey	Lucy	Author	1	UNIV-MELBOURNE	UNIV-MELBOURNE	UNIV-MELBOURNE	University	University - Rank 026-050	0	0	0	0	0	1	0	0	0	0	0	0	0	0	0	1	0	0	0	0	0	1	1	0	Article
50000568	The natural resource curse and the spread of HIV/AIDS, 1990-2008	SOCIAL SCIENCE & MEDICINE	2	2	Toll access article	Toll access	1	deSoysa-I	de Soysa	Indra	Author, Reprint Author	1	NORWEGIAN-UNIV-SCI-&-TECHNOL-NTNU	NORWEGIAN-UNIV-SCI-&-TECHNOL	NORWEGIAN-UNIV-SCI-&-TECHNOL	University	University - Rank 201-500	0	0	0	0	0	0	0	1	0	0	0	0	0	0	0	0	0	0	1	0	0	1	0	0	Article
50005323	THE POLITICS OF MEDICINE AND THE GLOBAL GOVERNANCE OF PANDEMIC INFLUENZA	INTERNATIONAL JOURNAL OF HEALTH SERVICES	1	3	Green OA article	Green OA	1	KamradtScott-A	Kamradt-Scott	Adam	Author, Reprint Author	1	UNIV-SYDNEY	UNIV-SYDNEY	UNIV-SYDNEY	University	University - Rank 051-100	1	0	0	0	0	1	0	0	0	0	0	0	0	0	0	0	1	0	0	0	0	1	0	0	Article
50016625	Global NeuroAIDS Roundtable	JOURNAL OF NEUROVIROLOGY	26	19	Green OA article	Green OA	1	Joseph-J	Joseph	Jeymohan	Author, Reprint Author	1	NIMH	NIMH	NIMH	Government	Government	0	0	0	0	0	1	0	0	0	1	0	0	0	0	0	0	0	0	0	0	0	0	0	0	Review
50020689	Addiction in the family is a major but neglected contributor to the global burden of adult ill-health	SOCIAL SCIENCE & MEDICINE	5	6	Green OA article	Green OA	1	Orford-J	Orford	Jim	Author, Reprint Author	1	UNIV-BIRMINGHAM	UNIV-BIRMINGHAM	UNIV-BIRMINGHAM	University	University - Rank 101-200	0	0	0	0	0	1	0	0	0	0	0	0	0	0	0	0	0	1	0	0	0	1	0	0	Article
50021320	The International Atomic Energy Agency's Activities in Radiation Medicine and Cancer: Promoting Global Health Through Diplomacy	CANADIAN ASSOCIATION OF RADIOLOGISTS JOURNAL-JOURNAL DE L ASSOCIATION CANADIENNE DES RADIOLOGISTES	5	1	Toll access article	Toll access	1	DeatschKratochvil-AN	Deatsch-Kratochvil	Amanda N.	Author	1	IAEA	IAEA	IAEA	Government	Government	0	0	0	0	0	0	0	1	0	1	0	0	0	0	0	0	0	0	0	0	0	0	0	0	Article
50029945	Global mapping of infectious disease	PHILOSOPHICAL TRANSACTIONS OF THE ROYAL SOCIETY B-BIOLOGICAL SCIENCES	11	7	Green OA article	Green OA	1	Hay-SI	Hay	Simon I.	Author, Reprint Author	1	UNIV-OXFORD	UNIV-OXFORD	UNIV-OXFORD	University	University - Rank 001-025	0	0	0	0	0	1	0	0	0	0	0	0	0	0	1	0	0	0	0	0	0	1	1	0	Review
50051112	Nurses' engagement in AIDS policy development	INTERNATIONAL NURSING REVIEW	7	3	Green OA article	Green OA	1	Richter-MS	Richter	M. S.	Author, Reprint Author	1	UNIV-ALBERTA	UNIV-ALBERTA	UNIV-ALBERTA	University	University - Rank 101-200	0	0	0	0	0	1	0	0	0	0	0	0	0	0	0	0	0	1	0	0	0	1	0	0	Article
50055507	Global Strategy for the Diagnosis, Management, and Prevention of Chronic Obstructive Pulmonary Disease GOLD Executive Summary	AMERICAN JOURNAL OF RESPIRATORY AND CRITICAL CARE MEDICINE	13	15	Green OA article	Green OA	1	Vestbo-J	Vestbo	Jorgen	Author, Reprint Author	1	S-MANCHESTER-UNIV-HOSP-NHS-FDN-TRUST	S-MANCHESTER-UNIV-HOSP-NHS-FDN-TRUST	S-MANCHESTER-UNIV-HOSP-NHS-FDN-TRUST	Hospital	Hospital	0	0	0	0	0	1	0	0	0	0	1	0	0	0	0	0	0	0	0	0	0	0	0	0	Article
50055907	Road Traffic Injuries: Social Change and Development	MEDICAL HISTORY	1	2	Green OA article	Green OA	1	Borowy-I	Borowy	Iris	Author, Reprint Author	1	UNIV-ROSTOCK	UNIV-ROSTOCK	UNIV-ROSTOCK	University	University: Unranked	1	0	0	0	0	1	0	0	0	0	0	0	0	0	0	0	0	0	0	0	1	1	0	0	Article
50058559	Addressing the challenge of neonatal mortality	TROPICAL MEDICINE & INTERNATIONAL HEALTH	2	1	Hybrid article	Hybrid	1	Blencowe-H	Blencowe	H.	Author, Reprint Author	1	UNIV-LONDON-LONDON-SCH-HYG-&-TROP-MED	UNIV-LONDON-LONDON-SCH-HYG-&-TROP-MED	UNIV-LONDON-LONDON-SCH-HYG-&-TROP-MED	University	University - Rank 001-025	0	3000	0	0	0	0	1	0	0	0	0	0	0	0	1	0	0	0	0	0	0	1	1	1	Review
50058567	Fifteen years of the tropEd Masters in International Health programme: what has it delivered? Results of an alumni survey of masters students in international health	TROPICAL MEDICINE & INTERNATIONAL HEALTH	6	3	Hybrid article	Hybrid	1	Gerstel-L	Gerstel	L.	Author, Reprint Author	1	ROYAL-TROP-INST	ROYAL-TROP-INST	ROYAL-TROP-INST	Research institute	Research Institute	0	3000	0	0	0	0	1	0	0	0	0	0	1	0	0	0	0	0	0	0	0	0	0	1	Article
50096140	The Lisbon Challenge: Acknowledging Palliative Care as a Human Right	JOURNAL OF PALLIATIVE MEDICINE	4	4	Toll access article	Toll access	1	Radbruch-L	Radbruch	Lukas	Author, Reprint Author	1	UNIV-BONN	UNIV-BONN	UNIV-BONN	University	University - Rank 101-200	0	0	0	0	0	0	0	1	0	0	0	0	0	0	0	0	0	1	0	0	0	1	0	0	Article
50099400	A very rare cancer in Down syndrome: medulloblastoma. Epidemiological data from 13 countries	JOURNAL OF NEURO-ONCOLOGY	22	22	Toll access article	Toll access	1	Satge-D	Satge	Daniel	Author, Reprint Author	1	UNIV-MONTPELLIER-I	UNIV-MONTPELLIER-I	UNIV-MONTPELLIER-I	University	University - Rank 201-500	0	0	0	0	0	0	0	1	0	0	0	0	0	0	0	0	0	0	1	0	0	1	0	0	Article
50110273	Global Estimates of Syphilis in Pregnancy and Associated Adverse Outcomes: Analysis of Multinational Antenatal Surveillance Data	PLOS MEDICINE	7	5	Gold OA article (APC)	Gold OA	1	Newman-L	Newman	Lori	Author, Reprint Author	1	WORLD-HLTH-ORG	WHO	WHO	Non-profit	Non-profit	0	2900	0	1	0	0	0	0	0	0	0	1	0	0	0	0	0	0	0	0	0	0	0	1	Article
50117523	A Roadmap to the Human Virome	PLOS PATHOGENS	1	2	Gold OA article (APC)	Gold OA	1	Delwart-E	Delwart	Eric	Author, Reprint Author	1	BLOOD-SYST-RES-INST	BLOOD-SYST-RES-INST	BLOOD-SYST-RES-INST	Company	Company	1	2250	0	1	0	0	0	0	1	0	0	0	0	0	0	0	0	0	0	0	0	0	0	1	Article
50120042	GLOBAL HEALTH Governance Challenges in Global Health	NEW ENGLAND JOURNAL OF MEDICINE	2	3	Delayed OA article	Delayed OA	1	Frenk-J	Frenk	Julio	Author, Reprint Author	1	HARVARD-UNIV	HARVARD-UNIV	HARVARD-UNIV	University	University - Rank 001-025	1	0	1	0	0	0	0	0	0	0	0	0	0	0	1	0	0	0	0	0	0	1	1	0	Review
50130703	Global Epidemiology of Tuberculosis Preface	SEMINARS IN RESPIRATORY AND CRITICAL CARE MEDICINE	4	1	Hybrid article	Hybrid	1	Glaziou-P	Glaziou	Philippe	Author, Reprint Author	1	WORLD-HLTH-ORG	WHO	WHO	Non-profit	Non-profit	0	3300	0	0	0	0	1	0	0	0	0	1	0	0	0	0	0	0	0	0	0	0	0	1	Review
50139020	An ethics curriculum for short-term global health trainees	GLOBALIZATION AND HEALTH	5	5	Gold OA article (APC)	Gold OA	1	DeCamp-M	DeCamp	Matthew	Author, Reprint Author	1	JOHNS-HOPKINS-BERMAN-INST-BIOETH	JOHNS-HOPKINS-UNIV	JOHNS-HOPKINS-UNIV	University	University - Rank 001-025	0	2145	0	1	0	0	0	0	0	0	0	0	0	0	1	0	0	0	0	0	0	1	1	1	Article
50152858	The balanced care model for global mental health	PSYCHOLOGICAL MEDICINE	2	2	Toll access article	Toll access	1	Thornicroft-G	Thornicroft	G.	Author, Reprint Author	1	KINGS-COLL-LONDON	KINGS-COLL-LONDON	KINGS-COLL-LONDON	University	University - Rank 026-050	0	0	0	0	0	0	0	1	0	0	0	0	0	0	0	1	0	0	0	0	0	1	1	0	Article
50156492	Promoting Volunteerism in Global Health: Lessons from a Medical Mission in Northern Mexico	JOURNAL OF COMMUNITY HEALTH	3	4	Toll access article	Toll access	1	Withers-M	Withers	Mellissa	Author, Reprint Author	1	UNIV-CALIF-LOS-ANGELES	UCLA	UCLA	University	University - Rank 001-025	0	0	0	0	0	0	0	1	0	0	0	0	0	0	1	0	0	0	0	0	0	1	1	0	Article
50162653	Bringing evidence to policy to achieve health-related MDGs for all: justification and design of the EPI-4 project in China, India, Indonesia, and Vietnam	GLOBAL HEALTH ACTION	9	8	Gold OA article (APC)	Gold OA	1	Thomsen-S	Thomsen	Sarah	Author, Reprint Author	1	KAROLINSKA-INST	KAROLINSKA-INST	KAROLINSKA-INST	University	University - Rank 026-050	0	1500	0	1	0	0	0	0	0	0	0	0	0	0	0	1	0	0	0	0	0	1	1	1	Article
50163639	Acute kidney injury: global health alert	KIDNEY INTERNATIONAL	3	3	Green OA article	Green OA	1	Li-PKT	Li	Philip Kam Tao	Author, Reprint Author	1	CHINESE-UNIV-HONG-KONG	CHINESE-UNIV-HONG-KONG	CHINESE-UNIV-HONG-KONG	University	University - Rank 051-100	0	0	0	0	0	1	0	0	0	0	0	0	0	0	0	0	1	0	0	0	0	1	0	0	Review
50177422	Metabolic/Bariatric Surgery Worldwide 2011	OBESITY SURGERY	2	1	Green OA article	Green OA	1	Buchwald-H	Buchwald	Henry	Author, Reprint Author	1	UNIV-MINNESOTA	UNIV-MINNESOTA	UNIV-MINNESOTA	University	University - Rank 051-100	0	0	0	0	0	1	0	0	0	0	0	0	0	0	0	0	1	0	0	0	0	1	0	0	Article
50201047	Modeling the obesity epidemic: social contagion and its implications for control	THEORETICAL BIOLOGY AND MEDICAL MODELLING	3	4	Gold OA article (APC)	Gold OA	1	Ejima-K	Ejima	Keisuke	Author	1	UNIV-HONG-KONG	UNIV-HONG-KONG	UNIV-HONG-KONG	University	University - Rank 026-050	0	2145	0	1	0	0	0	0	0	0	0	0	0	0	0	1	0	0	0	0	0	1	1	1	Article
50212812	Global health risks and cosmopolitisation: from emergence to interference	SOCIOLOGY OF HEALTH & ILLNESS	1	1	Toll access article	Toll access	1	Figuie-M	Figuie	Muriel	Author, Reprint Author	1	CTR-COOPERAT-INT-RECH-AGRON-DEV	CTR-COOPERAT-INT-RECH-AGRON-DEV	CTR-COOPERAT-INT-RECH-AGRON-DEV	Research institute	Research Institute	1	0	0	0	0	0	0	1	0	0	0	0	1	0	0	0	0	0	0	0	0	0	0	0	Article
50215729	Country- and individual-level socioeconomic determinants of depression: multilevel cross-national comparison	BRITISH JOURNAL OF PSYCHIATRY	5	5	Hybrid article	Hybrid	1	Rai-D	Rai	Dheeraj	Author, Reprint Author	1	UNIV-BRISTOL	UNIV-BRISTOL	UNIV-BRISTOL	University	University - Rank 051-100	0	4500	0	0	0	0	1	0	0	0	0	0	0	0	0	0	1	0	0	0	0	1	0	1	Article
50224469	International Incidence and Outcomes of Biliary Atresia	JOURNAL OF PEDIATRIC GASTROENTEROLOGY AND NUTRITION	5	2	Toll access article	Toll access	1	JimenezRivera-C	Jimenez-Rivera	Carolina	Author, Reprint Author	1	CHILDRENS-HOSP-EASTERN-ONTARIO	CHILDRENS-HOSP-EASTERN-ONTARIO	CHILDRENS-HOSP-EASTERN-ONTARIO	Hospital	Hospital	0	0	0	0	0	0	0	1	0	0	1	0	0	0	0	0	0	0	0	0	0	0	0	0	Review
50228209	Where do people die? An international comparison of the percentage of deaths occurring in hospital and residential aged care settings in 45 populations, using published and available statistics	INTERNATIONAL JOURNAL OF PUBLIC HEALTH	6	4	Green OA article	Green OA	1	Broad-JB	Broad	Joanna B.	Author, Reprint Author	1	UNIV-AUCKLAND	UNIV-AUCKLAND	UNIV-AUCKLAND	University	University - Rank 101-200	0	0	0	0	0	1	0	0	0	0	0	0	0	0	0	0	0	1	0	0	0	1	0	0	Article
50230549	Global health diplomacy: An integrative review of the literature and implications for nursing	NURSING OUTLOOK	7	10	Toll access article	Toll access	1	Hunter-A	Hunter	Anita	Author, Reprint Author	1	DOMINICAN-UNIV-CALIF	DOMINICAN-UNIV-CALIF	DOMINICAN-UNIV-CALIF	University	University: Unranked	0	0	0	0	0	0	0	1	0	0	0	0	0	0	0	0	0	0	0	0	1	1	0	0	Review
50249137	A Model for Measuring e-Health Status Across the World	TELEMEDICINE AND E-HEALTH	2	1	Toll access article	Toll access	1	Moghaddasi-H	Moghaddasi	Hamid	Author, Reprint Author	1	SHAHID-BEHESHTI-UNIV-MED-SCI	SHAHID-BEHESHTI-UNIV	SHAHID-BEHESHTI-UNIV	University	University - Rank 501+	0	0	0	0	0	0	0	1	0	0	0	0	0	0	0	0	0	0	0	1	0	1	0	0	Article
50266801	Global prevalence of anxiety disorders: a systematic review and meta-regression	PSYCHOLOGICAL MEDICINE	4	3	Green OA article	Green OA	1	Baxter-AJ	Baxter	A. J.	Author, Reprint Author	1	QUEENSLAND-CTR-MENTAL-HLTH-RES	QUEENSLAND-CTR-MENTAL-HLTH-RES	QUEENSLAND-CTR-MENTAL-HLTH-RES	Research institute	Research Institute	0	0	0	0	0	1	0	0	0	0	0	0	1	0	0	0	0	0	0	0	0	0	0	0	Review
50275324	Protection, Promotion, and Support and Global Trends in Breastfeeding	ADVANCES IN NUTRITION	2	2	Green OA article	Green OA	1	Lutter-CK	Lutter	Chessa K.	Author, Reprint Author	1	WHO	WHO	WHO	Non-profit	Non-profit	0	0	0	0	0	1	0	0	0	0	0	1	0	0	0	0	0	0	0	0	0	0	0	0	Article
50283428	The Association Between Global Health Training and Underserved Care: Early Findings From Two Longstanding Tracks	FAMILY MEDICINE	6	5	Gold OA article (non-APC)	Gold OA	1	Liaw-W	Liaw	Winston	Author, Reprint Author	1	VIRGINIA-COMMONWEALTH-UNIV	VIRGINIA-COMMONWEALTH-UNIV	VIRGINIA-COMMONWEALTH-UNIV	University	University: Unranked	0	0	0	0	1	0	0	0	0	0	0	0	0	0	0	0	0	0	0	0	1	1	0	0	Article
50284214	Is the reporting timeliness gap for avian flu and H1N1 outbreaks in global health surveillance systems associated with country transparency?	GLOBALIZATION AND HEALTH	6	6	Gold OA article (APC)	Gold OA	1	Tsai-FJ	Tsai	Feng-Jen	Author, Reprint Author	1	TAIPEI-MED-UNIV	TAIPEI-MED-UNIV	TAIPEI-MED-UNIV	University	University - Rank 501+	0	2145	0	1	0	0	0	0	0	0	0	0	0	0	0	0	0	0	0	1	0	1	0	1	Article
50286742	HOW MANY INFANTS LIKELY DIED IN AFRICA AS A RESULT OF THE 2008-2009 GLOBAL FINANCIAL CRISIS?	HEALTH ECONOMICS	2	2	Toll access article	Toll access	1	Friedman-J	Friedman	Jed	Author, Reprint Author	1	WORLD-BANK	WORLD-BANK	WORLD-BANK	Non-profit	Non-profit	0	0	0	0	0	0	0	1	0	0	0	1	0	0	0	0	0	0	0	0	0	0	0	0	Article
50295426	Characterizing the Global Burden of Surgical Disease: A Method to Estimate Inguinal Hernia Epidemiology in Ghana	WORLD JOURNAL OF SURGERY	5	2	Green OA article	Green OA	1	Beard-JH	Beard	Jessica H.	Author, Reprint Author	1	UNIV-CALIF-SAN-FRANCISCO	UCSF	UCSF	University	University - Rank 001-025	0	0	0	0	0	1	0	0	0	0	0	0	0	0	1	0	0	0	0	0	0	1	1	0	Article
50295896	A global view of hepatitis C: Physician knowledge, opinions, and perceived barriers to care	HEPATOLOGY	12	12	Green OA article	Green OA	1	McGowan-CE	McGowan	Christopher E.	Author	1	UNIV-N-CAROLINA	UNIV-N-CAROLINA	UNIV-N-CAROLINA	University	University - Rank 051-100	0	0	0	0	0	1	0	0	0	0	0	0	0	0	0	0	1	0	0	0	0	1	0	0	Article
50303275	ISHLT International Registry for Heart and Lung Transplantation - three decades of scientific contributions	TRANSPLANTATION REVIEWS	8	6	Toll access article	Toll access	1	Stehlik-J	Stehlik	Josef	Author, Reprint Author	1	UNIV-UTAH	UNIV-UTAH	UNIV-UTAH	University	University - Rank 201-500	0	0	0	0	0	0	0	1	0	0	0	0	0	0	0	0	0	0	1	0	0	1	0	0	Article
50303279	Global Database on donation and transplantation: Goals, methods and critical issues (www.transplant-observatory.org)	TRANSPLANTATION REVIEWS	5	3	Toll access article	Toll access	1	Mahillo-B	Mahillo	Beatriz	Author, Reprint Author	1	ORG-NACL-TRASPLANTES	ORG-NACL-TRASPLANTES	ORG-NACL-TRASPLANTES	Non-profit	Non-profit	0	0	0	0	0	0	0	1	0	0	0	1	0	0	0	0	0	0	0	0	0	0	0	0	Article
50315711	Improving access to care for children with mental disorders: a global perspective	ARCHIVES OF DISEASE IN CHILDHOOD	4	5	Green OA article	Green OA	1	Patel-V	Patel	Vikram	Author, Reprint Author	1	LONDON-SCH-HYG-&-TROP-MED	UCL	UCL	University	University - Rank 001-025	0	0	0	0	0	1	0	0	0	0	0	0	0	0	1	0	0	0	0	0	0	1	1	0	Article
50326678	Guidelines for Safety of Trainees Rotating Abroad: Consensus Recommendations from the Global Emergency Medicine Academy of the Society for Academic Emergency Medicine, Council of Emergency Medicine Residency Directors, and the Emergency Medicine Residents' Association	ACADEMIC EMERGENCY MEDICINE	10	9	Hybrid article	Hybrid	1	Hansoti-B	Hansoti	Bhakti	Author, Reprint Author	1	JOHNS-HOPKINS-UNIV	JOHNS-HOPKINS-UNIV	JOHNS-HOPKINS-UNIV	University	University - Rank 001-025	0	3000	0	0	0	0	1	0	0	0	0	0	0	0	1	0	0	0	0	0	0	1	1	1	Article
50327501	Global alcohol exposure estimates by country, territory and region for 2005a contribution to the Comparative Risk Assessment for the 2010 Global Burden of Disease Study	ADDICTION	6	9	Green OA article	Green OA	1	Shield-KD	Shield	Kevin D.	Author, Reprint Author	1	CTR-ADDICT-&-MENTAL-HLTH	CTR-ADDICT-&-MENTAL-HLTH	CTR-ADDICT-&-MENTAL-HLTH	Research institute	Research Institute	0	0	0	0	0	1	0	0	0	0	0	0	1	0	0	0	0	0	0	0	0	0	0	0	Article
50331502	Incidence of abnormalities in temporomandibular joints in a population of 1,100 urban and rural patients lacking teeth and other parafunctions in 2003-2008. An international problem	ANNALS OF AGRICULTURAL AND ENVIRONMENTAL MEDICINE	7	4	Gold OA article (APC)	Gold OA	1	Michalak-M	Michalak	Maciej	Author, Reprint Author	1	MIL-INST-MED	MIL-INST-MED	MIL-INST-MED	Hospital	Hospital	0	705	0	1	0	0	0	0	0	0	1	0	0	0	0	0	0	0	0	0	0	0	0	1	Article
50338246	International medical electives undertaken by Australian medical students: current trends and future directions	MEDICAL JOURNAL OF AUSTRALIA	3	2	Green OA article	Green OA	1	Law-IR	Law	Iain R.	Author, Reprint Author	1	FLINDERS-UNIV-S-AUSTRALIA	FLINDERS-UNIV-S-AUSTRALIA	FLINDERS-UNIV-S-AUSTRALIA	University	University - Rank 201-500	0	0	0	0	0	1	0	0	0	0	0	0	0	0	0	0	0	0	1	0	0	1	0	0	Article
50349257	Childhood Pneumonia and Diarrhoea 1 Global burden of childhood pneumonia and diarrhoea	LANCET	9	5	Toll access article	Toll access	1	Walker-CLF	Walker	Christa L. Fischer	Author	1	JOHNS-HOPKINS-BLOOMBERG-SCH-PUBL-HLTH	JOHNS-HOPKINS-UNIV	JOHNS-HOPKINS-UNIV	University	University - Rank 001-025	0	0	0	0	0	0	0	1	0	0	0	0	0	0	1	0	0	0	0	0	0	1	1	0	Article
50350469	INTRODUCTION: Global Health Challenges and the Role of Law	JOURNAL OF LAW MEDICINE & ETHICS	2	3	Toll access article	Toll access	1	Flood-CM	Flood	Colleen M.	Author, Reprint Author	1	UNIV-TORONTO	UNIV-TORONTO	UNIV-TORONTO	University	University - Rank 001-025	0	0	0	0	0	0	0	1	0	0	0	0	0	0	1	0	0	0	0	0	0	1	1	0	Article
50350470	Tackling the Global NCD Crisis: Innovations in Law and Governance	JOURNAL OF LAW MEDICINE & ETHICS	2	1	Toll access article	Toll access	1	Thomas-B	Thomas	Bryan	Author, Reprint Author	1	GEORGETOWN-UNIV	GEORGETOWN-UNIV	GEORGETOWN-UNIV	University	University - Rank 101-200	0	0	0	0	0	0	0	1	0	0	0	0	0	0	0	0	0	1	0	0	0	1	0	0	Article
50350472	Global Health, Vulnerable Populations, and Law	JOURNAL OF LAW MEDICINE & ETHICS	1	3	Toll access article	Toll access	1	Benatar-SR	Benatar	Solomon R.	Author, Reprint Author	1	UNIV-CAPE-TOWN	UNIV-CAPE-TOWN	UNIV-CAPE-TOWN	University	University - Rank 101-200	1	0	0	0	0	0	0	1	0	0	0	0	0	0	0	0	0	1	0	0	0	1	0	0	Article
50350474	The Role of Law in Ameliorating Global Inequalities in Indigenous Peoples' Health	JOURNAL OF LAW MEDICINE & ETHICS	1	2	Toll access article	Toll access	1	MacIntosh-C	MacIntosh	Constance	Author, Reprint Author	1	DALHOUSIE-UNIV	DALHOUSIE-UNIV	DALHOUSIE-UNIV	University	University - Rank 201-500	1	0	0	0	0	0	0	1	0	0	0	0	0	0	0	0	0	0	1	0	0	1	0	0	Article
50350475	A Survey of International Legal Instruments to Examine Their Effectiveness in Improving Global Health and in Realizing Health Rights	JOURNAL OF LAW MEDICINE & ETHICS	2	2	Toll access article	Toll access	1	Wilson-A	Wilson	Arthur	Author, Reprint Author	1	UNIV-TORONTO	UNIV-TORONTO	UNIV-TORONTO	University	University - Rank 001-025	0	0	0	0	0	0	0	1	0	0	0	0	0	0	1	0	0	0	0	0	0	1	1	0	Article
50350480	Pharmaceutical Knowledge Governance: A Human Rights Perspective	JOURNAL OF LAW MEDICINE & ETHICS	1	4	Toll access article	Toll access	1	Lemmens-T	Lemmens	Trudo	Author, Reprint Author	1	UNIV-TORONTO	UNIV-TORONTO	UNIV-TORONTO	University	University - Rank 001-025	1	0	0	0	0	0	0	1	0	0	0	0	0	0	1	0	0	0	0	0	0	1	1	0	Review
50352937	What is the value of global health electives during medical school?	MEDICAL TEACHER	3	2	Hybrid article	Hybrid	1	Stys-D	Stys	Dana	Author, Reprint Author	1	QUEENS-UNIV	QUEENS-UNIV	QUEENS-UNIV	University	University - Rank 201-500	0	2950	0	0	0	0	1	0	0	0	0	0	0	0	0	0	0	0	1	0	0	1	0	1	Article
50359038	Position statement of the World Heart Federation on the prevention and control of rheumatic heart disease	NATURE REVIEWS CARDIOLOGY	5	4	Toll access article	Toll access	1	Remenyi-B	Remenyi	Bo	Author	1	WORLD-HEART-FEDERAT	WORLD-HEART-FEDERAT	WORLD-HEART-FEDERAT	Non-profit	Non-profit	0	0	0	0	0	0	0	1	0	0	0	1	0	0	0	0	0	0	0	0	0	0	0	0	Review
50361685	The global distribution and burden of dengue	NATURE	18	16	Green OA article	Green OA	1	Bhatt-S	Bhatt	Samir	Author	1	UNIV-OXFORD	UNIV-OXFORD	UNIV-OXFORD	University	University - Rank 001-025	0	0	0	0	0	1	0	0	0	0	0	0	0	0	1	0	0	0	0	0	0	1	1	0	Article
50365918	Inequity in India: the case of maternal and reproductive health	GLOBAL HEALTH ACTION	5	2	Gold OA article (APC)	Gold OA	1	Sanneving-L	Sanneving	Linda	Author, Reprint Author	1	KAROLINSKA-INST	KAROLINSKA-INST	KAROLINSKA-INST	University	University - Rank 026-050	0	1500	0	1	0	0	0	0	0	0	0	0	0	0	0	1	0	0	0	0	0	1	1	1	Article
50366075	Global health post-2015: the case for universal health equity	GLOBAL HEALTH ACTION	1	1	Gold OA article (APC)	Gold OA	1	DAmbruoso-L	D'Ambruoso	Lucia	Author, Reprint Author	1	UMEA-UNIV	UMEA-UNIV	UMEA-UNIV	University	University - Rank 201-500	1	1500	0	1	0	0	0	0	0	0	0	0	0	0	0	0	0	0	1	0	0	1	0	1	Article
50367117	Welfare State Regimes, Gender, and Depression: A Multilevel Analysis of Middle and High Income Countries	INTERNATIONAL JOURNAL OF ENVIRONMENTAL RESEARCH AND PUBLIC HEALTH	7	8	Gold OA article (APC)	Gold OA	1	Chung-H	Chung	Haejoo	Author	1	KOREA-UNIV	KOREA-UNIV	KOREA-UNIV	University	University - Rank 201-500	0	1650.72	0	1	0	0	0	0	0	0	0	0	0	0	0	0	0	0	1	0	0	1	0	1	Article
50372840	'BRICS without straw'? A systematic literature review of newly emerging economies' influence in global health	GLOBALIZATION AND HEALTH	4	3	Gold OA article (APC)	Gold OA	1	Harmer-A	Harmer	Andrew	Author, Reprint Author	1	UNIV-EDINBURGH	UNIV-EDINBURGH	UNIV-EDINBURGH	University	University - Rank 026-050	0	2145	0	1	0	0	0	0	0	0	0	0	0	0	0	1	0	0	0	0	0	1	1	1	Review
50382233	High Blood Pressure Selected as the Theme for World Health Day, April 7, 2013: Cup Half Full or Half Empty?	CANADIAN JOURNAL OF CARDIOLOGY	4	4	Toll access article	Toll access	1	Campbell-NRC	Campbell	Norm R. C.	Author	1	UNIV-CALGARY	UNIV-CALGARY	UNIV-CALGARY	University	University - Rank 101-200	0	0	0	0	0	0	0	1	0	0	0	0	0	0	0	0	0	1	0	0	0	1	0	0	Article
50389963	Global Iodine Nutrition: Where Do We Stand in 2013?	THYROID	3	2	Toll access article	Toll access	1	Pearce-EN	Pearce	Elizabeth N.	Author, Reprint Author	1	BOSTON-UNIV	BOSTON-UNIV	BOSTON-UNIV	University	University - Rank 051-100	0	0	0	0	0	0	0	1	0	0	0	0	0	0	0	0	1	0	0	0	0	1	0	0	Article
50406865	World Health Assembly Agendas and trends of international health issues for the last 43 years: Analysis of World Health Assembly Agendas between 1970 and 2012	HEALTH POLICY	9	5	Hybrid article	Hybrid	1	Kitamura-T	Kitamura	Tomomi	Author	1	NATL-CTR-GLOBAL-HLTH-&-MED	NATL-CTR-GLOBAL-HLTH-&-MED	NATL-CTR-GLOBAL-HLTH-&-MED	Hospital	Hospital	0	3000	0	0	0	0	1	0	0	0	1	0	0	0	0	0	0	0	0	0	0	0	0	1	Article
50408365	Global health education: a pilot in trans-disciplinary, digital instruction	GLOBAL HEALTH ACTION	3	5	Gold OA article (APC)	Gold OA	1	Wipfli-H	Wipfli	Heather	Author, Reprint Author	1	UNIV-SO-CALIF	UNIV-SO-CALIF	UNIV-SO-CALIF	University	University - Rank 051-100	0	1500	0	1	0	0	0	0	0	0	0	0	0	0	0	0	1	0	0	0	0	1	0	1	Article
50430176	Global health education in US Medical schools	BMC MEDICAL EDUCATION	13	15	Gold OA article (APC)	Gold OA	1	Khan-OA	Khan	Omar A.	Author, Reprint Author	1	CHRISTIANA-CARE-HLTH-SYST	CHRISTIANA-CARE-HLTH-SYST	CHRISTIANA-CARE-HLTH-SYST	Hospital	Hospital	0	2145	0	1	0	0	0	0	0	0	1	0	0	0	0	0	0	0	0	0	0	0	0	1	Article
50439875	A Global Perspective on Psychosocial Risk Factors for Cardiovascular Disease	PROGRESS IN CARDIOVASCULAR DISEASES	7	3	Toll access article	Toll access	1	Neylon-A	Neylon	Antoinette	Author	1	MATER-MISERICORDIAE-UNIV-HOSP	MATER-MISERICORDIAE-UNIV-HOSP	MATER-MISERICORDIAE-UNIV-HOSP	Hospital	Hospital	0	0	0	0	0	0	0	1	0	0	1	0	0	0	0	0	0	0	0	0	0	0	0	0	Review
50446921	Assessing new strategies for TB diagnosis in low- and middle-income countries	BRAZILIAN JOURNAL OF INFECTIOUS DISEASES	7	6	Gold OA article (non-APC)	Gold OA	1	Kritski-A	Kritski	Afranio	Author, Reprint Author	1	REDE-TB	REDE-TB	REDE-TB	Non-profit	Non-profit	0	0	0	0	1	0	0	0	0	0	0	1	0	0	0	0	0	0	0	0	0	0	0	0	Article
50458706	The Global Burden of Visual Difficulty in Low, Middle, and High Income Countries	PLOS ONE	7	3	Gold OA article (APC)	Gold OA	1	Freeman-EE	Freeman	Ellen E.	Author, Reprint Author	1	UNIV-MONTREAL	UNIV-MONTREAL	UNIV-MONTREAL	University	University - Rank 101-200	0	1495	0	1	0	0	0	0	0	0	0	0	0	0	0	0	0	1	0	0	0	1	0	1	Article
50482391	Global health experiences of U.S. Physicians: a mixed methods survey of clinician-researchers and health policy leaders	GLOBALIZATION AND HEALTH	5	7	Gold OA article (APC)	Gold OA	1	Greysen-SR	Greysen	S. Ryan	Author, Reprint Author	1	UNIV-CALIF-SAN-FRANCISCO	UCSF	UCSF	University	University - Rank 001-025	0	2145	0	1	0	0	0	0	0	0	0	0	0	0	1	0	0	0	0	0	0	1	1	1	Article
50496281	The association between diabetes and an episode of depressive symptoms in the 2002 World Health Survey: an analysis of 231797 individuals from 47 countries	DIABETIC MEDICINE	5	4	Toll access article	Toll access	1	Mommersteeg-PMC	Mommersteeg	P. M. C.	Author, Reprint Author	1	TILBURG-UNIV	TILBURG-UNIV	TILBURG-UNIV	University	University - Rank 101-200	0	0	0	0	0	0	0	1	0	0	0	0	0	0	0	0	0	1	0	0	0	1	0	0	Article
50537234	Recurrence of adverse perinatal outcomes in developing countries	BULLETIN OF THE WORLD HEALTH ORGANIZATION	6	4	Gold OA article (non-APC)	Gold OA	1	Ouyang-FX	Ouyang	Fengxiu	Author	1	SHANGHAI-JIAO-TONG-UNIV	SHANGHAI-JIAO-TONG-UNIV	SHANGHAI-JIAO-TONG-UNIV	University	University - Rank 201-500	0	0	0	0	1	0	0	0	0	0	0	0	0	0	0	0	0	0	1	0	0	1	0	0	Article
50556980	VIRTUE IN MEDICINE RECONSIDERED individual health and global health	PERSPECTIVES IN BIOLOGY AND MEDICINE	2	3	Gold OA article (non-APC)	Gold OA	1	Benatar-S	Benatar	Solomon	Author, Reprint Author	1	UNIV-CAPE-TOWN	UNIV-CAPE-TOWN	UNIV-CAPE-TOWN	University	University - Rank 101-200	0	0	0	0	1	0	0	0	0	0	0	0	0	0	0	0	0	1	0	0	0	1	0	0	Article
50564598	Disability weights in the Global Burden of Disease 2010: Unclear meaning and overstatement of international agreement	HEALTH POLICY	1	2	Toll access article	Toll access	1	Nord-E	Nord	Erik	Author, Reprint Author	1	NORWEGIAN-INST-PUBL-HLTH	NORWEGIAN-INST-PUBL-HLTH	NORWEGIAN-INST-PUBL-HLTH	Research institute	Research Institute	1	0	0	0	0	0	0	1	0	0	0	0	1	0	0	0	0	0	0	0	0	0	0	0	Article
50583764	Response to the AIDS Pandemic - A Global Health Model	NEW ENGLAND JOURNAL OF MEDICINE	2	2	Green OA article	Green OA	1	Piot-P	Piot	Peter	Author, Reprint Author	1	UNIV-LONDON-LONDON-SCH-HYG-&-TROP-MED	UNIV-LONDON-LONDON-SCH-HYG-&-TROP-MED	UNIV-LONDON-LONDON-SCH-HYG-&-TROP-MED	University	University - Rank 001-025	0	0	0	0	0	1	0	0	0	0	0	0	0	0	1	0	0	0	0	0	0	1	1	0	Review
50590469	Therapeutic plasmas available worldwide	TRANSFUSION CLINIQUE ET BIOLOGIQUE	3	2	Toll access article	Toll access	1	Martinaud-C	Martinaud	C.	Author, Reprint Author	1	CTR-TRANSFUS-SANGUINE-ARMEES	CTR-TRANSFUS-SANGUINE-ARMEES	CTR-TRANSFUS-SANGUINE-ARMEES	Research institute	Research Institute	0	0	0	0	0	0	0	1	0	0	0	0	1	0	0	0	0	0	0	0	0	0	0	0	Article
50608229	Understanding how and why health is integrated into foreign policy - a case study of health is global, a UK Government Strategy 2008-2013	GLOBALIZATION AND HEALTH	2	2	Gold OA article (APC)	Gold OA	1	Gagnon-ML	Gagnon	Michelle L.	Author, Reprint Author	1	UNIV-OTTAWA	UNIV-OTTAWA	UNIV-OTTAWA	University	University - Rank 201-500	0	2145	0	1	0	0	0	0	0	0	0	0	0	0	0	0	0	0	1	0	0	1	0	1	Article
50608748	Global Health and Justice: Re-examining our Values	BIOETHICS	1	4	Toll access article	Toll access	1	Benatar-SR	Benatar	Solomon R.	Author, Reprint Author	1	UNIV-CAPE-TOWN	UNIV-CAPE-TOWN	UNIV-CAPE-TOWN	University	University - Rank 101-200	1	0	0	0	0	0	0	1	0	0	0	0	0	0	0	0	0	1	0	0	0	1	0	0	Article
50616945	Getting the Job Done: Analysis of the Impact and Effectiveness of the SmileTrain Program in Alleviating the Global Burden of Cleft Disease	WORLD JOURNAL OF SURGERY	1	1	Green OA article	Green OA	1	Poenaru-D	Poenaru	D.	Author, Reprint Author	1	BETHANYKIDS-KIJABE-HOSP	BETHANYKIDS-KIJABE-HOSP	BETHANYKIDS-KIJABE-HOSP	Hospital	Hospital	1	0	0	0	0	1	0	0	0	0	1	0	0	0	0	0	0	0	0	0	0	0	0	0	Article
50628917	Reflections on the Maternal Mortality Millennium Goal	BIRTH-ISSUES IN PERINATAL CARE	2	2	Toll access article	Toll access	1	Lawson-GW	Lawson	Gerald W.	Author, Reprint Author	1	JOHN-HUNTER-HOSP	JOHN-HUNTER-HOSP	JOHN-HUNTER-HOSP	Hospital	Hospital	0	0	0	0	0	0	0	1	0	0	1	0	0	0	0	0	0	0	0	0	0	0	0	0	Article
50635025	Global Burden of Oral Conditions in 1990-2010: A Systematic Analysis	JOURNAL OF DENTAL RESEARCH	7	4	Green OA article	Green OA	1	Marcenes-W	Marcenes	W.	Author, Reprint Author	1	QUEEN-MARY-UNIV-LONDON	QUEEN-MARY-UNIV-LONDON	QUEEN-MARY-UNIV-LONDON	University	University - Rank 101-200	0	0	0	0	0	1	0	0	0	0	0	0	0	0	0	0	0	1	0	0	0	1	0	0	Article
50652826	Role of law at the non-communicable diseases-climate change interface: considerations for planetary and population health policy	PUBLIC HEALTH	3	2	Toll access article	Toll access	1	Boylan-S	Boylan	S.	Author, Reprint Author	1	UNIV-SYDNEY	UNIV-SYDNEY	UNIV-SYDNEY	University	University - Rank 051-100	0	0	0	0	0	0	0	1	0	0	0	0	0	0	0	0	1	0	0	0	0	1	0	0	Article
50654006	Quinidine, A Life-Saving Medication for Brugada Syndrome, Is Inaccessible in Many Countries	JOURNAL OF THE AMERICAN COLLEGE OF CARDIOLOGY	14	9	Hybrid article	Hybrid	1	Viskin-S	Viskin	Sami	Author, Reprint Author	1	TEL-AVIV-UNIV	TEL-AVIV-UNIV	TEL-AVIV-UNIV	University	University - Rank 201-500	0	3000	0	0	0	0	1	0	0	0	0	0	0	0	0	0	0	0	1	0	0	1	0	1	Article
50660759	Improvement of research quality in the fields of orthopaedics and trauma-a global perspective	INTERNATIONAL ORTHOPAEDICS	17	13	Green OA article	Green OA	1	Fayaz-HC	Fayaz	Hangama C.	Author, Reprint Author	1	HARVARD-UNIV	HARVARD-UNIV	HARVARD-UNIV	University	University - Rank 001-025	0	0	0	0	0	1	0	0	0	0	0	0	0	0	1	0	0	0	0	0	0	1	1	0	Review
50669095	Clinical outcomes and safety with trabectedin therapy in patients with advanced soft tissue sarcomas following failure of prior chemotherapy: results of a worldwide expanded access program study	ANNALS OF ONCOLOGY	10	11	Hybrid article	Hybrid	1	Samuels-BL	Samuels	B. L.	Author, Reprint Author	1	KOOTENAI-CANC-CTR	KOOTENAI-CANC-CTR	KOOTENAI-CANC-CTR	Hospital	Hospital	0	3500	0	0	0	0	1	0	0	0	1	0	0	0	0	0	0	0	0	0	0	0	0	1	Article
50671719	An inter-professional "advocacy and activism in global health': module for the training of physician-advocates	GLOBAL HEALTH PROMOTION	4	4	Toll access article	Toll access	1	Peluso-MJ	Peluso	Michael J.	Author, Reprint Author	1	YALE-UNIV	YALE-UNIV	YALE-UNIV	University	University - Rank 001-025	0	0	0	0	0	0	0	1	0	0	0	0	0	0	1	0	0	0	0	0	0	1	1	0	Article
50682349	Global health opportunities within pediatric subspecialty fellowship training programs: surveying the virtual landscape	BMC MEDICAL EDUCATION	5	4	Gold OA article (APC)	Gold OA	1	Dixon-CA	Dixon	Cinnamon A.	Author, Reprint Author	1	UNIV-CINCINNATI	UNIV-CINCINNATI	UNIV-CINCINNATI	University	University - Rank 201-500	0	2145	0	1	0	0	0	0	0	0	0	0	0	0	0	0	0	0	1	0	0	1	0	1	Article
50682841	Factors that influence current tuberculosis epidemiology	EUROPEAN SPINE JOURNAL	7	3	Green OA article	Green OA	1	Millet-JP	Millet	Juan-Pablo	Author, Reprint Author	1	PUBL-HLTH-AGCY-BARCELONA	PUBL-HLTH-AGCY-BARCELONA	PUBL-HLTH-AGCY-BARCELONA	Government	Government	0	0	0	0	0	1	0	0	0	1	0	0	0	0	0	0	0	0	0	0	0	0	0	0	Review
50690128	Increased frequency of visits improves the efficiency of surgical global health initiatives	JOURNAL OF OTOLARYNGOLOGY-HEAD & NECK SURGERY	6	4	Gold OA article (APC)	Gold OA	1	Byaruhanga-R	Byaruhanga	Richard	Author	1	MAKERERE-UNIV	MAKERERE-UNIV	MAKERERE-UNIV	University	University - Rank 201-500	0	2145	0	1	0	0	0	0	0	0	0	0	0	0	0	0	0	0	1	0	0	1	0	1	Article
50694784	Worldwide socioeconomic status and stroke mortality: an ecological study	INTERNATIONAL JOURNAL FOR EQUITY IN HEALTH	3	3	Gold OA article (APC)	Gold OA	1	Wu-SH	Wu	Sheng Hui	Author	1	VANDERBILT-UNIV	VANDERBILT-UNIV	VANDERBILT-UNIV	University	University - Rank 101-200	0	2220	0	1	0	0	0	0	0	0	0	0	0	0	0	0	0	1	0	0	0	1	0	1	Article
50719588	Operationalizing a One Health approach to global health challenges	COMPARATIVE IMMUNOLOGY MICROBIOLOGY AND INFECTIOUS DISEASES	3	3	Toll access article	Toll access	1	Conrad-PA	Conrad	Patricia A.	Author, Reprint Author	1	UNIV-CALIF-DAVIS	UNIV-CALIF-DAVIS	UNIV-CALIF-DAVIS	University	University - Rank 051-100	0	0	0	0	0	0	0	1	0	0	0	0	0	0	0	0	1	0	0	0	0	1	0	0	Article
50723264	GLOBAL HEALTH Mental Health and the Global Agenda	NEW ENGLAND JOURNAL OF MEDICINE	2	3	Delayed OA article	Delayed OA	1	Becker-AE	Becker	Anne E.	Author	1	HARVARD-UNIV	HARVARD-UNIV	HARVARD-UNIV	University	University - Rank 001-025	0	0	1	0	0	0	0	0	0	0	0	0	0	0	1	0	0	0	0	0	0	1	1	0	Review
50742932	Impact of a Global Mental Health Program on a Residency Training Program	ACADEMIC PSYCHIATRY	2	1	Toll access article	Toll access	1	Marienfeld-C	Marienfeld	Carla	Author, Reprint Author	1	YALE-UNIV	YALE-UNIV	YALE-UNIV	University	University - Rank 001-025	0	0	0	0	0	0	0	1	0	0	0	0	0	0	1	0	0	0	0	0	0	1	1	0	Article
50760350	Teaching Immigrant and Refugee Health to Residents: Domestic Global Health	TEACHING AND LEARNING IN MEDICINE	4	2	Green OA article	Green OA	1	Asgary-R	Asgary	Ramin	Author, Reprint Author	1	ALBERT-EINSTEIN-COLL-MED	ALBERT-EINSTEIN-COLL-MED	ALBERT-EINSTEIN-COLL-MED	University	University: Unranked	0	0	0	0	0	1	0	0	0	0	0	0	0	0	0	0	0	0	0	0	1	1	0	0	Article
50760351	A Case for an International Health Elective Training Program During Residency: A Four-Points Call for Action	TEACHING AND LEARNING IN MEDICINE	2	1	Toll access article	Toll access	1	Coupet-S	Coupet	Sidney	Author, Reprint Author	1	UNIV-MICHIGAN	UNIV-MICHIGAN	UNIV-MICHIGAN	University	University - Rank 001-025	0	0	0	0	0	0	0	1	0	0	0	0	0	0	1	0	0	0	0	0	0	1	1	0	Article
50774782	Control of iron deficiency anemia in low- and middle-income countries	BLOOD	5	5	Hybrid article	Hybrid	1	Pasricha-SR	Pasricha	Sant-Rayn	Author, Reprint Author	1	UNIV-MELBOURNE	UNIV-MELBOURNE	UNIV-MELBOURNE	University	University - Rank 026-050	0	2000	0	0	0	0	1	0	0	0	0	0	0	0	0	1	0	0	0	0	0	1	1	1	Review
50778854	Human mobility and the worldwide impact of intentional localized highly pathogenic virus release	SCIENTIFIC REPORTS	3	4	Gold OA article (APC)	Gold OA	1	Goncalves-B	Goncalves	Bruno	Author	1	AIX-MARSEILLE-UNIV	AIX-MARSEILLE-UNIV	AIX-MARSEILLE-UNIV	University	University - Rank 201-500	0	1495	0	1	0	0	0	0	0	0	0	0	0	0	0	0	0	0	1	0	0	1	0	1	Article
50779944	Modeling health impact of global health programs implemented by Population Services International	BMC PUBLIC HEALTH	5	4	Gold OA article (APC)	Gold OA	1	Yang-HM	Yang	Hongmei	Author, Reprint Author	1	POPULAT-SERV-INT	POPULAT-SERV-INT	POPULAT-SERV-INT	Non-profit	Non-profit	0	2145	0	1	0	0	0	0	0	0	0	1	0	0	0	0	0	0	0	0	0	0	0	1	Article
50790248	Global trends in neglected tropical disease control and elimination: impact on child health	ARCHIVES OF DISEASE IN CHILDHOOD	4	6	Toll access article	Toll access	1	Barry-MA	Barry	Meagan A.	Author, Reprint Author	1	BAYLOR-COLL-MED	BAYLOR-COLL-MED	BAYLOR-COLL-MED	University	University: Unranked	0	0	0	0	0	0	0	1	0	0	0	0	0	0	0	0	0	0	0	0	1	1	0	0	Article
50799148	Constitutional rights to health, public health and medical care: The status of health protections in 191 countries	GLOBAL PUBLIC HEALTH	4	2	Toll access article	Toll access	1	Heymann-J	Heymann	Jody	Author, Reprint Author	1	UNIV-CALIF-LOS-ANGELES	UCLA	UCLA	University	University - Rank 001-025	0	0	0	0	0	0	0	1	0	0	0	0	0	0	1	0	0	0	0	0	0	1	1	0	Article
50799153	Beyond procedural ethics: Foregrounding questions of justice in global health research ethics training for students	GLOBAL PUBLIC HEALTH	2	2	Green OA article	Green OA	1	Hunt-MR	Hunt	Matthew R.	Author, Reprint Author	1	MCGILL-UNIV	MCGILL-UNIV	MCGILL-UNIV	University	University - Rank 026-050	0	0	0	0	0	1	0	0	0	0	0	0	0	0	0	1	0	0	0	0	0	1	1	0	Article
50799754	Setting priorities for stroke care and research	INTERNATIONAL JOURNAL OF STROKE	2	3	Green OA article	Green OA	1	Morgenstern-LB	Morgenstern	L. B.	Author, Reprint Author	1	UNIV-MICHIGAN	UNIV-MICHIGAN	UNIV-MICHIGAN	University	University - Rank 001-025	0	0	0	0	0	1	0	0	0	0	0	0	0	0	1	0	0	0	0	0	0	1	1	0	Article
50840700	Developing a Scorecard to Assess Global Progress in Scaling Up Diarrhea Control Tools: A Qualitative Study of Academic Leaders and Implementers	PLOS ONE	3	2	Gold OA article (APC)	Gold OA	1	Rosinski-AA	Rosinski	Alexander Anthony	Author, Reprint Author	1	UNIV-CALIF-SAN-FRANCISCO	UCSF	UCSF	University	University - Rank 001-025	0	1495	0	1	0	0	0	0	0	0	0	0	0	0	1	0	0	0	0	0	0	1	1	1	Article
50840852	Global Epidemiology of Mental Disorders: What Are We Missing?	PLOS ONE	5	7	Gold OA article (APC)	Gold OA	1	Baxter-AJ	Baxter	Amanda J.	Author, Reprint Author	1	UNIV-QUEENSLAND	UNIV-QUEENSLAND	UNIV-QUEENSLAND	University	University - Rank 051-100	0	1495	0	1	0	0	0	0	0	0	0	0	0	0	0	0	1	0	0	0	0	1	0	1	Article
50843045	The Epidemiology of Depression Across Cultures	Annual Review of Public Health	2	2	Green OA article	Green OA	1	Kessler-RC	Kessler	Ronald C.	Author, Reprint Author	1	HARVARD-UNIV	HARVARD-UNIV	HARVARD-UNIV	University	University - Rank 001-025	0	0	0	0	0	1	0	0	0	0	0	0	0	0	1	0	0	0	0	0	0	1	1	0	Review
50843053	Prospects for Tuberculosis Elimination	Annual Review of Public Health	4	2	Toll access article	Toll access	1	Dye-C	Dye	Christopher	Author, Reprint Author	1	WHO	WHO	WHO	Non-profit	Non-profit	0	0	0	0	0	0	0	1	0	0	0	1	0	0	0	0	0	0	0	0	0	0	0	0	Review
50853671	Trends in alcohol-related deaths in the EU countries in 1980-2003	INTERNATIONAL JOURNAL OF SOCIAL PSYCHIATRY	8	5	Green OA article	Green OA	1	Innamorati-M	Innamorati	Marco	Author, Reprint Author	1	UNIV-ROMA-LA-SAPIENZA	UNIV-ROMA-LA-SAPIENZA	UNIV-ROMA-LA-SAPIENZA	University	University - Rank 201-500	0	0	0	0	0	1	0	0	0	0	0	0	0	0	0	0	0	0	1	0	0	1	0	0	Article
50856195	Universal access to care for multidrug-resistant tuberculosis: an analysis of surveillance data	LANCET INFECTIOUS DISEASES	6	1	Toll access article	Toll access	1	Falzon-D	Falzon	Dennis	Author, Reprint Author	1	WORLD-HLTH-ORG	WHO	WHO	Non-profit	Non-profit	0	0	0	0	0	0	0	1	0	0	0	1	0	0	0	0	0	0	0	0	0	0	0	0	Article
50857733	Emerging Infectious Diseases: Threats to Human Health and Global Stability	PLOS PATHOGENS	2	1	Gold OA article (APC)	Gold OA	1	Morens-DM	Morens	David M.	Author, Reprint Author	1	NIAID	NIAID	NIAID	Government	Government	0	2250	0	1	0	0	0	0	0	1	0	0	0	0	0	0	0	0	0	0	0	0	0	1	Article
50858151	World scientific collaboration in coronary heart disease research	INTERNATIONAL JOURNAL OF CARDIOLOGY	4	3	Green OA article	Green OA	1	Yu-Q	Yu	Qi	Author	1	SHANXI-MED-UNIV	SHANXI-MED-UNIV	SHANXI-MED-UNIV	University	University: Unranked	0	0	0	0	0	1	0	0	0	0	0	0	0	0	0	0	0	0	0	0	1	1	0	0	Review
50859672	Emergence of multilateral proto-institutions in global health and new approaches to governance: analysis using path dependency and institutional theory	GLOBALIZATION AND HEALTH	2	4	Gold OA article (APC)	Gold OA	1	Gomez-EJ	Gomez	Eduardo J.	Author, Reprint Author	1	RUTGERS-STATE-UNIV	RUTGERS-STATE-UNIV	RUTGERS-STATE-UNIV	University	University - Rank 101-200	0	2145	0	1	0	0	0	0	0	0	0	0	0	0	0	0	0	1	0	0	0	1	0	1	Article
50859958	Gender gaps in life expectancy: generalized trends and negative associations with development indices in OECD countries	EUROPEAN JOURNAL OF PUBLIC HEALTH	6	3	Hybrid article	Hybrid	1	Liu-Y	Liu	Yan	Author	1	HOKKAIDO-UNIV	HOKKAIDO-UNIV	HOKKAIDO-UNIV	University	University - Rank 201-500	0	2400	0	0	0	0	1	0	0	0	0	0	0	0	0	0	0	0	1	0	0	1	0	1	Article
50875764	Surgery and the global health agenda	JOURNAL OF THE ROYAL SOCIETY OF MEDICINE	2	3	Toll access article	Toll access	1	Grimes-CE	Grimes	Caris E.	Author, Reprint Author	1	EAST-SURREY-HOSP	EAST-SURREY-HOSP	EAST-SURREY-HOSP	Hospital	Hospital	0	0	0	0	0	0	0	1	0	0	1	0	0	0	0	0	0	0	0	0	0	0	0	0	Article
50877010	Views from the global south: exploring how student volunteers from the global north can achieve sustainable impact in global health	GLOBALIZATION AND HEALTH	2	5	Gold OA article (APC)	Gold OA	1	Ouma-BDO	Ouma	Brian D. O.	Author	1	DAISYS-EYE-CANC-FUND-KENYA	DAISYS-EYE-CANC-FUND-KENYA	DAISYS-EYE-CANC-FUND-KENYA	Non-profit	Non-profit	0	2145	0	1	0	0	0	0	0	0	0	1	0	0	0	0	0	0	0	0	0	0	0	1	Article
50877979	Measuring the Global Burden of Disease	NEW ENGLAND JOURNAL OF MEDICINE	2	2	Delayed OA article	Delayed OA	1	Murray-CJL	Murray	Christopher J. L.	Author, Reprint Author	1	UNIV-WASHINGTON	UNIV-WASHINGTON	UNIV-WASHINGTON	University	University - Rank 026-050	0	0	1	0	0	0	0	0	0	0	0	0	0	0	0	1	0	0	0	0	0	1	1	0	Article
50881704	Key informant interview on antimicrobial resistance (AMR) in some countries in the western pacific region	GLOBALIZATION AND HEALTH	2	2	Gold OA article (APC)	Gold OA	1	Lee-Y	Lee	Yuri	Author, Reprint Author	1	WHO	WHO	WHO	Non-profit	Non-profit	0	2145	0	1	0	0	0	0	0	0	0	1	0	0	0	0	0	0	0	0	0	0	0	1	Article
50883130	Infections of the Developing World	CRITICAL CARE CLINICS	3	3	Toll access article	Toll access	1	Murthy-S	Murthy	Srinivas	Author, Reprint Author	1	HOSP-SICK-CHILDREN	HOSP-SICK-CHILDREN	HOSP-SICK-CHILDREN	Hospital	Hospital	0	0	0	0	0	0	0	1	0	0	1	0	0	0	0	0	0	0	0	0	0	0	0	0	Article
50892560	Viral hepatitis and the Global Burden of Disease: a need to regroup	JOURNAL OF VIRAL HEPATITIS	8	8	Toll access article	Toll access	1	Cooke-GS	Cooke	G. S.	Author, Reprint Author	1	UNIV-LONDON-IMPERIAL-COLL-SCI-TECHNOL-&-MED	UNIV-LONDON-IMPERIAL-COLL-SCI-TECHNOL-&-MED	UNIV-LONDON-IMPERIAL-COLL-SCI-TECHNOL-&-MED	University	University - Rank 001-025	0	0	0	0	0	0	0	1	0	0	0	0	0	0	1	0	0	0	0	0	0	1	1	0	Article
50916924	Global Epidemiology of Amyotrophic Lateral Sclerosis: A Systematic Review of the Published Literature	NEUROEPIDEMIOLOGY	7	6	Green OA article	Green OA	1	Chio-A	Chio	A.	Author, Reprint Author	1	UNIV-TURIN	UNIV-TURIN	UNIV-TURIN	University	University - Rank 201-500	0	0	0	0	0	1	0	0	0	0	0	0	0	0	0	0	0	0	1	0	0	1	0	0	Review
50920093	The financial crisis and global health: the International Monetary Funds (IMF) policy response	HEALTH PROMOTION INTERNATIONAL	2	1	Hybrid article	Hybrid	1	Ruckert-A	Ruckert	Arne	Author, Reprint Author	1	UNIV-OTTAWA	UNIV-OTTAWA	UNIV-OTTAWA	University	University - Rank 201-500	0	3000	0	0	0	0	1	0	0	0	0	0	0	0	0	0	0	0	1	0	0	1	0	1	Article
50920101	Understanding attrition from international internet health interventions: a step towards global eHealth	HEALTH PROMOTION INTERNATIONAL	5	4	Green OA article	Green OA	1	Geraghty-AWA	Geraghty	Adam W. A.	Author	1	UNIV-SOUTHAMPTON	UNIV-SOUTHAMPTON	UNIV-SOUTHAMPTON	University	University - Rank 101-200	0	0	0	0	0	1	0	0	0	0	0	0	0	0	0	0	0	1	0	0	0	1	0	0	Article
50929540	Global health actors no longer in favor of user fees: a documentary study	GLOBALIZATION AND HEALTH	2	2	Gold OA article (APC)	Gold OA	1	Robert-E	Robert	Emilie	Author, Reprint Author	1	UNIV-MONTREAL	UNIV-MONTREAL	UNIV-MONTREAL	University	University - Rank 101-200	0	2145	0	1	0	0	0	0	0	0	0	0	0	0	0	0	0	1	0	0	0	1	0	1	Article
50929541	Global health initiative investments and health systems strengthening: a content analysis of global fund investments	GLOBALIZATION AND HEALTH	5	6	Gold OA article (APC)	Gold OA	1	Warren-AE	Warren	Ashley E.	Author, Reprint Author	1	SWISS-TROP-&-PUBL-HLTH-INST	SWISS-TROP-&-PUBL-HLTH-INST	SWISS-TROP-&-PUBL-HLTH-INST	Research institute	Research Institute	0	2145	0	1	0	0	0	0	0	0	0	0	1	0	0	0	0	0	0	0	0	0	0	1	Article
50938785	Mycotoxin occurrence in feed and feed raw materials worldwide: long-term analysis with special focus on Europe and Asia	JOURNAL OF THE SCIENCE OF FOOD AND AGRICULTURE	4	3	Toll access article	Toll access	1	Streit-E	Streit	Elisabeth	Author	1	BIOMIN-RES-CTR	BIOMIN	BIOMIN	Company	Company	0	0	0	0	0	0	0	1	1	0	0	0	0	0	0	0	0	0	0	0	0	0	0	0	Review
50939429	Potential years of life lost (PYLL) caused by asbestos-related diseases in the world	AMERICAN JOURNAL OF INDUSTRIAL MEDICINE	9	8	Toll access article	Toll access	1	Diandini-R	Diandini	Rachmania	Author	1	UNIV-OCCUPAT-&-ENVIRONM-HLTH	UNIV-OCCUPAT-&-ENVIRONM-HLTH	UNIV-OCCUPAT-&-ENVIRONM-HLTH	University	University: Unranked	0	0	0	0	0	0	0	1	0	0	0	0	0	0	0	0	0	0	0	0	1	1	0	0	Article
50957115	These are Good Problems to Have ... : Establishing a Collaborative Research Partnership in East Africa	JOURNAL OF GENERAL INTERNAL MEDICINE	8	2	Green OA article	Green OA	1	Tierney-WM	Tierney	William M.	Author, Reprint Author	1	INDIANA-UNIV-SCH-MED	INDIANA-UNIV	INDIANA-UNIV	University	University - Rank 101-200	0	0	0	0	0	1	0	0	0	0	0	0	0	0	0	0	0	1	0	0	0	1	0	0	Article
50957116	Taking Stock of the Ethical Foundations of International Health Research: Pragmatic Lessons from the IU-Moi Academic Research Ethics Partnership	JOURNAL OF GENERAL INTERNAL MEDICINE	3	3	Green OA article	Green OA	1	Meslin-EM	Meslin	Eric M.	Author, Reprint Author	1	INDIANA-UNIV	INDIANA-UNIV	INDIANA-UNIV	University	University - Rank 101-200	0	0	0	0	0	1	0	0	0	0	0	0	0	0	0	0	0	1	0	0	0	1	0	0	Article
50957117	The Global Role of Health Care Delivery Science: Learning from Variation to Build Health Systems that Avoid Waste and Harm	JOURNAL OF GENERAL INTERNAL MEDICINE	1	2	Green OA article	Green OA	1	Mulley-AG	Mulley	Albert G.	Author, Reprint Author	1	DARTMOUTH-COLL	DARTMOUTH-COLL	DARTMOUTH-COLL	University	University - Rank 051-100	1	0	0	0	0	1	0	0	0	0	0	0	0	0	0	0	1	0	0	0	0	1	0	0	Article
50957118	Laboratory Support of Global Health Research	JOURNAL OF GENERAL INTERNAL MEDICINE	1	2	Green OA article	Green OA	1	VanderPol-B	Van der Pol	Barbara	Author, Reprint Author	1	INDIANA-UNIV	INDIANA-UNIV	INDIANA-UNIV	University	University - Rank 101-200	1	0	0	0	0	1	0	0	0	0	0	0	0	0	0	0	0	1	0	0	0	1	0	0	Article
50958291	Trends in World Dental Research: an overview of the last three decades using the Web of Science	CLINICAL ORAL INVESTIGATIONS	5	3	Green OA article	Green OA	1	Pulgar-R	Pulgar	R.	Author	1	UNIV-GRANADA	UNIV-GRANADA	UNIV-GRANADA	University	University - Rank 501+	0	0	0	0	0	1	0	0	0	0	0	0	0	0	0	0	0	0	0	1	0	1	0	0	Article
50962179	Looking twice at the gender equity index for public health impact	BMC PUBLIC HEALTH	7	6	Gold OA article (APC)	Gold OA	1	FernandezSaez-J	Fernandez-Saez	Jose	Author, Reprint Author	1	UNIV-ALICANTE	UNIV-ALICANTE	UNIV-ALICANTE	University	University: Unranked	0	2145	0	1	0	0	0	0	0	0	0	0	0	0	0	0	0	0	0	0	1	1	0	1	Article
50971451	White Paper Report of the 2012 RAD-AID Conference on International Radiology for Developing Countries: Planning the Implementation of Global Radiology	JOURNAL OF THE AMERICAN COLLEGE OF RADIOLOGY	3	2	Green OA article	Green OA	1	Mollura-DJ	Mollura	Daniel J.	Author, Reprint Author	1	RAD-AID-INT	RAD-AID-INT	RAD-AID-INT	Non-profit	Non-profit	0	0	0	0	0	1	0	0	0	0	0	1	0	0	0	0	0	0	0	0	0	0	0	0	Article
50977151	Who cares about health inequalities? Cross-country evidence from the World Health Survey	HEALTH POLICY AND PLANNING	3	5	Green OA article	Green OA	1	King-NB	King	Nicholas B.	Author, Reprint Author	1	MCGILL-UNIV	MCGILL-UNIV	MCGILL-UNIV	University	University - Rank 026-050	0	0	0	0	0	1	0	0	0	0	0	0	0	0	0	1	0	0	0	0	0	1	1	0	Article
51008983	The Challenges of Disease Risk Ascertainment Using Accessible Data Sources for Numbers of Travelers	JOURNAL OF TRAVEL MEDICINE	2	2	Hybrid article	Hybrid	1	Behrens-RH	Behrens	Ronald H.	Author, Reprint Author	1	MORTIMER-MARKET-CTR	MORTIMER-MARKET-CTR	MORTIMER-MARKET-CTR	Hospital	Hospital	0	3000	0	0	0	0	1	0	0	0	1	0	0	0	0	0	0	0	0	0	0	0	0	1	Article
51011358	Raising awareness of acute kidney injury: a global perspective of a silent killer	KIDNEY INTERNATIONAL	3	3	Green OA article	Green OA	1	Lewington-AJP	Lewington	Andrew J. P.	Author	1	ST-JAMES-UNIV-HOSP	ST-JAMES-UNIV-HOSP	ST-JAMES-UNIV-HOSP	Hospital	Hospital	0	0	0	0	0	1	0	0	0	0	1	0	0	0	0	0	0	0	0	0	0	0	0	0	Review
51015140	Burden of tuberculosis in indigenous peoples globally: a systematic review	INTERNATIONAL JOURNAL OF TUBERCULOSIS AND LUNG DISEASE	6	5	Green OA article	Green OA	1	Tollefson-D	Tollefson	D.	Author	1	EMORY-UNIV	EMORY-UNIV	EMORY-UNIV	University	University - Rank 051-100	0	0	0	0	0	1	0	0	0	0	0	0	0	0	0	0	1	0	0	0	0	1	0	0	Review
51036184	GLOBAL HEALTH Behavioral and Dietary Risk Factors for Noncommunicable Diseases	NEW ENGLAND JOURNAL OF MEDICINE	2	1	Delayed OA article	Delayed OA	1	Ezzati-M	Ezzati	Majid	Author, Reprint Author	1	UNIV-LONDON-IMPERIAL-COLL-SCI-TECHNOL-&-MED	UNIV-LONDON-IMPERIAL-COLL-SCI-TECHNOL-&-MED	UNIV-LONDON-IMPERIAL-COLL-SCI-TECHNOL-&-MED	University	University - Rank 001-025	0	0	1	0	0	0	0	0	0	0	0	0	0	0	1	0	0	0	0	0	0	1	1	0	Review
51039083	Study Abroad Programs: Using Alumni and Graduate Students as Affiliate Faculty	NURSE EDUCATOR	5	1	Toll access article	Toll access	1	Palmer-S	Palmer	Sheri	Author, Reprint Author	1	BRIGHAM-YOUNG-UNIV	BRIGHAM-YOUNG-UNIV	BRIGHAM-YOUNG-UNIV	University	University: Unranked	0	0	0	0	0	0	0	1	0	0	0	0	0	0	0	0	0	0	0	0	1	1	0	0	Article
51044114	Rethinking health research capacity strengthening	GLOBAL PUBLIC HEALTH	4	3	Green OA article	Green OA	1	Vasquez-EE	Vasquez	Emily E.	Author, Reprint Author	1	COLUMBIA-UNIV	COLUMBIA-UNIV	COLUMBIA-UNIV	University	University - Rank 001-025	0	0	0	0	0	1	0	0	0	0	0	0	0	0	1	0	0	0	0	0	0	1	1	0	Article
51044317	Ageing as a global public health challenge: From complexity reduction to aid effectiveness	GLOBAL PUBLIC HEALTH	2	2	Toll access article	Toll access	1	Esser-DE	Esser	Daniel E.	Author, Reprint Author	1	AMERICAN-UNIV	AMERICAN-UNIV	AMERICAN-UNIV	University	University - Rank 201-500	0	0	0	0	0	0	0	1	0	0	0	0	0	0	0	0	0	0	1	0	0	1	0	0	Article
51044319	Implementing clinical guidelines in low-income settings: A review of literature	GLOBAL PUBLIC HEALTH	6	4	Toll access article	Toll access	1	Chakkalakal-RJ	Chakkalakal	Rosette J.	Author	1	VANDERBILT-UNIV	VANDERBILT-UNIV	VANDERBILT-UNIV	University	University - Rank 101-200	0	0	0	0	0	0	0	1	0	0	0	0	0	0	0	0	0	1	0	0	0	1	0	0	Article
51046188	Global confluence of infectious and non-communicable diseases - The case of type 2 diabetes	PREVENTIVE MEDICINE	2	2	Toll access article	Toll access	1	Magee-MJ	Magee	M. J.	Author, Reprint Author	2	EMORY-UNIV	EMORY-UNIV	EMORY-UNIV	University	University - Rank 051-100	1	0	0	0	0	0	0	1	0	0	0	0	0	0	0	0	1	0	0	0	0	1	0	0	Article
51048026	Embarrassment when illness strikes a close relative: a World Mental Health Survey Consortium Multi-Site Study	PSYCHOLOGICAL MEDICINE	20	22	Green OA article	Green OA	1	Ahmedani-BK	Ahmedani	B. K.	Author, Reprint Author	1	HENRY-FORD-HLTH-SYST	HENRY-FORD-HLTH-SYST	HENRY-FORD-HLTH-SYST	Hospital	Hospital	0	0	0	0	0	1	0	0	0	0	1	0	0	0	0	0	0	0	0	0	0	0	0	0	Article
51060569	Epidemiology of Oral-Cavity and Oropharyngeal Carcinomas Controlling a Tobacco Epidemic While a Human Papillomavirus Epidemic Emerges	OTOLARYNGOLOGIC CLINICS OF NORTH AMERICA	2	2	Toll access article	Toll access	1	Hashibe-M	Hashibe	Mia	Author, Reprint Author	1	UNIV-UTAH	UNIV-UTAH	UNIV-UTAH	University	University - Rank 201-500	0	0	0	0	0	0	0	1	0	0	0	0	0	0	0	0	0	0	1	0	0	1	0	0	Article
51069446	A model for 'reverse innovation' in health care	GLOBALIZATION AND HEALTH	2	2	Gold OA article (APC)	Gold OA	1	DePasse-JW	DePasse	Jacqueline W.	Author	1	MASSACHUSETTS-GEN-HOSP	MASSACHUSETTS-GEN-HOSP	MASSACHUSETTS-GEN-HOSP	Hospital	Hospital	0	2145	0	1	0	0	0	0	0	0	1	0	0	0	0	0	0	0	0	0	0	0	0	1	Article
51085692	What Are We Assessing When We Measure Food Security? A Compendium and Review of Current Metrics	ADVANCES IN NUTRITION	4	2	Green OA article	Green OA	1	Jones-AD	Jones	Andrew D.	Author, Reprint Author	1	UNIV-MICHIGAN	UNIV-MICHIGAN	UNIV-MICHIGAN	University	University - Rank 001-025	0	0	0	0	0	1	0	0	0	0	0	0	0	0	1	0	0	0	0	0	0	1	1	0	Review
51085696	Building Evidence for Sustainability of Food and Nutrition Intervention Programs in Developing Countries	ADVANCES IN NUTRITION	5	3	Green OA article	Green OA	1	Kim-SS	Kim	Sunny S.	Author, Reprint Author	1	INT-FOOD-POLICY-RES-INST	INT-FOOD-POLICY-RES-INST	INT-FOOD-POLICY-RES-INST	Research institute	Research Institute	0	0	0	0	0	1	0	0	0	0	0	0	1	0	0	0	0	0	0	0	0	0	0	0	Article
51085699	Iodine Insufficiency: A Global Health Problem?	ADVANCES IN NUTRITION	2	2	Green OA article	Green OA	1	Swanson-CA	Swanson	Christine A.	Author, Reprint Author	1	NIH	NIH	NIH	Government	Government	0	0	0	0	0	1	0	0	0	1	0	0	0	0	0	0	0	0	0	0	0	0	0	0	Article
51085707	The WHO Evidence-Informed Guideline Development Process and Implications for Vitamin and Mineral Research Priorities: Symposium Rationale and Summary	ADVANCES IN NUTRITION	7	5	Green OA article	Green OA	1	Neufeld-LM	Neufeld	Lynnette M.	Author, Reprint Author	1	CANADIAN-INT-DEV-AGCY	CANADIAN-INT-DEV-AGCY	CANADIAN-INT-DEV-AGCY	Government	Government	0	0	0	0	0	1	0	0	0	1	0	0	0	0	0	0	0	0	0	0	0	0	0	0	Article
51088716	The epidemiology of substance use among street children in resource-constrained settings: a systematic review and meta-analysis	ADDICTION	5	7	Green OA article	Green OA	1	Embleton-L	Embleton	Lonnie	Author	1	MOI-UNIV	MOI-UNIV	MOI-UNIV	University	University: Unranked	0	0	0	0	0	1	0	0	0	0	0	0	0	0	0	0	0	0	0	0	1	1	0	0	Review
51091719	A global assessment of the oesophageal adenocarcinoma epidemic	GUT	4	6	Toll access article	Toll access	1	Edgren-G	Edgren	Gustaf	Author, Reprint Author	1	HARVARD-UNIV	HARVARD-UNIV	HARVARD-UNIV	University	University - Rank 001-025	0	0	0	0	0	0	0	1	0	0	0	0	0	0	1	0	0	0	0	0	0	1	1	0	Article
51149203	Redefining global health-care delivery	LANCET	3	3	Green OA article	Green OA	1	Kim-JY	Kim	Jim Yong	Author	1	WORLD-BANK-GRP	WORLD-BANK	WORLD-BANK	Non-profit	Non-profit	0	0	0	0	0	1	0	0	0	0	0	1	0	0	0	0	0	0	0	0	0	0	0	0	Article
51154241	Health technology assessments as a mechanism for increased value for money: recommendations to the Global Fund	GLOBALIZATION AND HEALTH	5	2	Gold OA article (APC)	Gold OA	1	Teerawattananon-Y	Teerawattananon	Yot	Author, Reprint Author	1	MINIST-PUBL-HLTH	MINIST-PUBL-HLTH-THAILAND	MINIST-PUBL-HLTH-THAILAND	Government	Government	0	2145	0	1	0	0	0	0	0	1	0	0	0	0	0	0	0	0	0	0	0	0	0	1	Review
51156932	Impact of 2008 global economic crisis on suicide: time trend study in 54 countries	BMJ-BRITISH MEDICAL JOURNAL	4	6	Green OA article	Green OA	1	Chang-SS	Chang	Shu-Sen	Author, Reprint Author	1	UNIV-HONG-KONG	UNIV-HONG-KONG	UNIV-HONG-KONG	University	University - Rank 026-050	0	0	0	0	0	1	0	0	0	0	0	0	0	0	0	1	0	0	0	0	0	1	1	0	Article
51200083	Cost of peritoneal dialysis and haemodialysis across the world	NEPHROLOGY DIALYSIS TRANSPLANTATION	4	5	Hybrid article	Hybrid	1	Karopadi-AN	Karopadi	Akash Nayak	Author	1	SAN-BORTOLO-HOSP	SAN-BORTOLO-HOSP	SAN-BORTOLO-HOSP	Hospital	Hospital	0	2800	0	0	0	0	1	0	0	0	1	0	0	0	0	0	0	0	0	0	0	0	0	1	Article
51224416	Mortality from ischaemic heart disease by country, region, and age: Statistics from World Health Organisation and United Nations	INTERNATIONAL JOURNAL OF CARDIOLOGY	3	2	Green OA article	Green OA	1	Finegold-JA	Finegold	Judith A.	Author, Reprint Author	1	NATL-HEART-&-LUNG-INST	NATL-HEART-&-LUNG-INST	NATL-HEART-&-LUNG-INST	University	University - Rank 001-025	0	0	0	0	0	1	0	0	0	0	0	0	0	0	1	0	0	0	0	0	0	1	1	0	Article
51224454	Worldwide risk factors for heart failure: A systematic review and pooled analysis	INTERNATIONAL JOURNAL OF CARDIOLOGY	5	5	Green OA article	Green OA	1	Khatibzadeh-S	Khatibzadeh	Shahab	Author	1	HARVARD-UNIV	HARVARD-UNIV	HARVARD-UNIV	University	University - Rank 001-025	0	0	0	0	0	1	0	0	0	0	0	0	0	0	1	0	0	0	0	0	0	1	1	0	Article
51225854	What Is the Current Status of Global Health Activities and Opportunities in US Orthopaedic Residency Programs?	CLINICAL ORTHOPAEDICS AND RELATED RESEARCH	5	5	Green OA article	Green OA	1	Clement-RC	Clement	R. Carter	Author, Reprint Author	1	UNIV-N-CAROLINA	UNIV-N-CAROLINA	UNIV-N-CAROLINA	University	University - Rank 051-100	0	0	0	0	0	1	0	0	0	0	0	0	0	0	0	0	1	0	0	0	0	1	0	0	Article
51230705	An evaluation of the global network of field epidemiology and laboratory training programmes: a resource for improving public health capacity and increasing the number of public health professionals worldwide	HUMAN RESOURCES FOR HEALTH	3	3	Gold OA article (APC)	Gold OA	1	Subramanian-RE	Subramanian	Renee E.	Author, Reprint Author	1	TASK-FORCE-GLOBAL-HLTH-INC	TASK-FORCE-GLOBAL-HLTH	TASK-FORCE-GLOBAL-HLTH	Non-profit	Non-profit	0	2450	0	1	0	0	0	0	0	0	0	1	0	0	0	0	0	0	0	0	0	0	0	1	Article
51233665	The Role of SIOP as a Platform for Communication in the Global Response to Childhood Cancer	PEDIATRIC BLOOD & CANCER	5	5	Toll access article	Toll access	1	Calaminus-G	Calaminus	Gabriele	Author, Reprint Author	1	UNIV-MUNSTER	UNIV-MUNSTER	UNIV-MUNSTER	University	University - Rank 101-200	0	0	0	0	0	0	0	1	0	0	0	0	0	0	0	0	0	1	0	0	0	1	0	0	Article
51251594	Contributions of Positive Psychology to Peace Toward Global Well-Being and Resilience	AMERICAN PSYCHOLOGIST	4	4	Green OA article	Green OA	1	Cohrs-JC	Cohrs	J. Christopher	Author, Reprint Author	1	JACOBS-UNIV-BREMEN	JACOBS-UNIV-BREMEN	JACOBS-UNIV-BREMEN	University	University: Unranked	0	0	0	0	0	1	0	0	0	0	0	0	0	0	0	0	0	0	0	0	1	1	0	0	Article
51255036	Factors affecting the HIV/AIDS epidemic: an ecological analysis of global data	AFRICAN HEALTH SCIENCES	2	3	Gold OA article (non-APC)	Gold OA	1	Mondal-MNI	Mondal	M. N.	Author, Reprint Author	1	UNIV-PUTRA-MALAYSIA	UNIV-PUTRA-MALAYSIA	UNIV-PUTRA-MALAYSIA	University	University - Rank 501+	0	0	0	0	1	0	0	0	0	0	0	0	0	0	0	0	0	0	0	1	0	1	0	0	Article
51256245	World Incidence of AKI: A Meta-Analysis	CLINICAL JOURNAL OF THE AMERICAN SOCIETY OF NEPHROLOGY	7	5	Green OA article	Green OA	1	Susantitaphong-P	Susantitaphong	Paweena	Author	1	ST-ELIZABETHS-MED-CTR	ST-ELIZABETHS-MED-CTR	ST-ELIZABETHS-MED-CTR	Hospital	Hospital	0	0	0	0	0	1	0	0	0	0	1	0	0	0	0	0	0	0	0	0	0	0	0	0	Article
51263973	Exploring the utility of institutional theory in analysing international health agency stasis and change	HEALTH POLICY AND PLANNING	1	1	Hybrid article	Hybrid	1	Gomez-EJ	Gomez	Eduardo J.	Author, Reprint Author	1	RUTGERS-STATE-UNIV	RUTGERS-STATE-UNIV	RUTGERS-STATE-UNIV	University	University - Rank 101-200	1	2400	0	0	0	0	1	0	0	0	0	0	0	0	0	0	0	1	0	0	0	1	0	1	Article
51266303	Domestic Global Health: A Curriculum Teaching Medical Students to Evaluate Refugee Asylum Seekers and Torture Survivors	TEACHING AND LEARNING IN MEDICINE	4	1	Toll access article	Toll access	1	Asgary-R	Asgary	Ramin	Author, Reprint Author	1	ICAHN-SCH-MED-MT-SINAI	ICAHN-SCH-MED-MT-SINAI	ICAHN-SCH-MED-MT-SINAI	University	University: Unranked	0	0	0	0	0	0	0	1	0	0	0	0	0	0	0	0	0	0	0	0	1	1	0	0	Article
51282006	Global survey of healthcare practitioners' beliefs and practices around intrauterine contraceptive method use in nulliparous women	CONTRACEPTION	5	5	Toll access article	Toll access	1	Black-KI	Black	Kirsten I.	Author, Reprint Author	1	UNIV-SYDNEY	UNIV-SYDNEY	UNIV-SYDNEY	University	University - Rank 051-100	0	0	0	0	0	0	0	1	0	0	0	0	0	0	0	0	1	0	0	0	0	1	0	0	Article
51286770	Relationship of Lipoproteins to Cardiovascular Events The AIM-HIGH Trial (Atherothrombosis Intervention in Metabolic Syndrome With Low HDL/High Triglycerides and Impact on Global Health Outcomes)	JOURNAL OF THE AMERICAN COLLEGE OF CARDIOLOGY	13	11	Green OA article	Green OA	1	Guyton-JR	Guyton	John R.	Author, Reprint Author	1	DUKE-UNIV	DUKE-UNIV	DUKE-UNIV	University	University - Rank 001-025	0	0	0	0	0	1	0	0	0	0	0	0	0	0	1	0	0	0	0	0	0	1	1	0	Article
51290800	The Global Drug Facility and its role in the market for tuberculosis drugs	LANCET	4	4	Green OA article	Green OA	1	Arinaminpathy-N	Arinaminpathy	Nimalan	Author, Reprint Author	1	PRINCETON-UNIV	PRINCETON-UNIV	PRINCETON-UNIV	University	University - Rank 001-025	0	0	0	0	0	1	0	0	0	0	0	0	0	0	1	0	0	0	0	0	0	1	1	0	Article
51294198	Global lessons on transforming strategy into action to save mothers' lives	INTERNATIONAL JOURNAL OF GYNECOLOGY & OBSTETRICS	3	3	Toll access article	Toll access	1	Pucher-PH	Pucher	Philip H.	Author, Reprint Author	1	UNIV-LONDON-IMPERIAL-COLL-SCI-TECHNOL-&-MED	UNIV-LONDON-IMPERIAL-COLL-SCI-TECHNOL-&-MED	UNIV-LONDON-IMPERIAL-COLL-SCI-TECHNOL-&-MED	University	University - Rank 001-025	0	0	0	0	0	0	0	1	0	0	0	0	0	0	1	0	0	0	0	0	0	1	1	0	Article
51301279	Global rates of glaucoma surgery	GRAEFES ARCHIVE FOR CLINICAL AND EXPERIMENTAL OPHTHALMOLOGY	3	4	Toll access article	Toll access	1	Mansouri-K	Mansouri	Kaweh	Author, Reprint Author	1	UNIV-CALIF-SAN-DIEGO	UNIV-CALIF-SAN-DIEGO	UNIV-CALIF-SAN-DIEGO	University	University - Rank 026-050	0	0	0	0	0	0	0	1	0	0	0	0	0	0	0	1	0	0	0	0	0	1	1	0	Article
51311334	Review Article: Plague Gives Surprises in the First Decade of the 21st Century in the United States and Worldwide	AMERICAN JOURNAL OF TROPICAL MEDICINE AND HYGIENE	1	1	Green OA article	Green OA	1	Butler-T	Butler	Thomas	Author, Reprint Author	1	ROSS-UNIV	ROSS-UNIV	ROSS-UNIV	University	University: Unranked	1	0	0	0	0	1	0	0	0	0	0	0	0	0	0	0	0	0	0	0	1	1	0	0	Review
51314711	The epidemiology and public health importance of toxocariasis: A zoonosis of global importance	INTERNATIONAL JOURNAL FOR PARASITOLOGY	1	2	Green OA article	Green OA	1	Macpherson-CNL	Macpherson	Calum N. L.	Author, Reprint Author	1	ST-GEORGES-UNIV	ST-GEORGES-UNIV	ST-GEORGES-UNIV	University	University: Unranked	1	0	0	0	0	1	0	0	0	0	0	0	0	0	0	0	0	0	0	0	1	1	0	0	Review
51317367	The Global Epidemiology and Contribution of Cannabis Use and Dependence to the Global Burden of Disease: Results from the GBD 2010 Study	PLOS ONE	11	9	Gold OA article (APC)	Gold OA	1	Degenhardt-L	Degenhardt	Louisa	Author, Reprint Author	1	UNIV-NEW-S-WALES	UNIV-NEW-S-WALES	UNIV-NEW-S-WALES	University	University - Rank 051-100	0	1495	0	1	0	0	0	0	0	0	0	0	0	0	0	0	1	0	0	0	0	1	0	1	Article
51319586	Thirty years of the United Nations and global ageing: An Australian perspective	AUSTRALASIAN JOURNAL ON AGEING	3	1	Toll access article	Toll access	1	Kendig-H	Kendig	Hal	Author, Reprint Author	1	AUSTRALIAN-NATL-UNIV	AUSTRALIAN-NATL-UNIV	AUSTRALIAN-NATL-UNIV	University	University - Rank 026-050	0	0	0	0	0	0	0	1	0	0	0	0	0	0	0	1	0	0	0	0	0	1	1	0	Article
51320186	Global health: the importance of evidence-based medicine	BMC MEDICINE	6	7	Gold OA article (APC)	Gold OA	1	Birbeck-GL	Birbeck	Gretchen L.	Author, Reprint Author	1	UNIV-ROCHESTER	UNIV-ROCHESTER	UNIV-ROCHESTER	University	University - Rank 101-200	0	2785	0	1	0	0	0	0	0	0	0	0	0	0	0	0	0	1	0	0	0	1	0	1	Article
51322248	Enacting global health in the nursing classroom	NURSE EDUCATION TODAY	2	1	Toll access article	Toll access	1	MacNeil-J	MacNeil	Joan	Author, Reprint Author	1	UNIV-VICTORIA	UNIV-VICTORIA	UNIV-VICTORIA	University	University - Rank 201-500	0	0	0	0	0	0	0	1	0	0	0	0	0	0	0	0	0	0	1	0	0	1	0	0	Article
51322250	Assessing global partnerships in graduate nursing	NURSE EDUCATION TODAY	4	4	Green OA article	Green OA	1	Birch-AP	Birch	Amelia P.	Author	1	MCGILL-UNIV	MCGILL-UNIV	MCGILL-UNIV	University	University - Rank 026-050	0	0	0	0	0	1	0	0	0	0	0	0	0	0	0	1	0	0	0	0	0	1	1	0	Article
51327203	Meeting the challenge: The evolving global landscape of adult congenital heart disease	INTERNATIONAL JOURNAL OF CARDIOLOGY	12	4	Green OA article	Green OA	1	Kempny-A	Kempny	Aleksander	Author, Reprint Author	1	ROYAL-BROMPTON-&-HAREFIELD-NHS-FDN-TRUST	ROYAL-BROMPTON-&-HAREFIELD-NHS-FDN-TRUST	ROYAL-BROMPTON-&-HAREFIELD-NHS-FDN-TRUST	Hospital	Hospital	0	0	0	0	0	1	0	0	0	0	1	0	0	0	0	0	0	0	0	0	0	0	0	0	Article
51367194	Developing global health technology standards: what can other industries teach us?	GLOBALIZATION AND HEALTH	3	4	Gold OA article (APC)	Gold OA	1	Masum-H	Masum	Hassan	Author, Reprint Author	1	UNIV-HLTH-NETWORK	UNIV-HLTH-NETWORK	UNIV-HLTH-NETWORK	Research institute	Research Institute	0	2145	0	1	0	0	0	0	0	0	0	0	1	0	0	0	0	0	0	0	0	0	0	1	Article
51376769	The global NAFLD epidemic	NATURE REVIEWS GASTROENTEROLOGY & HEPATOLOGY	2	3	Toll access article	Toll access	1	Loomba-R	Loomba	Rohit	Author	1	UNIV-CALIF-SAN-DIEGO	UNIV-CALIF-SAN-DIEGO	UNIV-CALIF-SAN-DIEGO	University	University - Rank 026-050	0	0	0	0	0	0	0	1	0	0	0	0	0	0	0	1	0	0	0	0	0	1	1	0	Article
51379773	The global burden of unsafe medical care: analytic modelling of observational studies	BMJ QUALITY & SAFETY	6	4	Green OA article	Green OA	1	Jha-AK	Jha	Ashish K.	Author, Reprint Author	1	HARVARD-UNIV	HARVARD-UNIV	HARVARD-UNIV	University	University - Rank 001-025	0	0	0	0	0	1	0	0	0	0	0	0	0	0	1	0	0	0	0	0	0	1	1	0	Article
51386630	Recent randomized controlled trials of psychological interventions in healthcare: A review of their quantity, scope, and characteristics	JOURNAL OF PSYCHOSOMATIC RESEARCH	4	4	Toll access article	Toll access	1	Arnberg-FK	Arnberg	Filip K.	Author, Reprint Author	1	UPPSALA-UNIV	UPPSALA-UNIV	UPPSALA-UNIV	University	University - Rank 051-100	0	0	0	0	0	0	0	1	0	0	0	0	0	0	0	0	1	0	0	0	0	1	0	0	Review
51390634	World Health Organization 2006 Child Growth Standards and 2007 Growth Reference Charts: A Discussion Paper by the Committee on Nutrition of the European Society for Pediatric Gastroenterology, Hepatology, and Nutrition	JOURNAL OF PEDIATRIC GASTROENTEROLOGY AND NUTRITION	13	13	Toll access article	Toll access	1	Turck-D	Turck	Dominique	Author, Reprint Author	1	UNIV-LILLE	UNIV-LILLE	UNIV-LILLE	University	University - Rank 201-500	0	0	0	0	0	0	0	1	0	0	0	0	0	0	0	0	0	0	1	0	0	1	0	0	Article
51391800	Review on the worldwide epidemiology of uveitis	EUROPEAN JOURNAL OF OPHTHALMOLOGY	4	1	Toll access article	Toll access	1	Miserocchi-E	Miserocchi	Elisabetta	Author, Reprint Author	1	UNIV-VITA-SALUTE-SAN-RAFFAELE	UNIV-VITA-SALUTE-SAN-RAFFAELE	UNIV-VITA-SALUTE-SAN-RAFFAELE	University	University: Unranked	0	0	0	0	0	0	0	1	0	0	0	0	0	0	0	0	0	0	0	0	1	1	0	0	Review
51410506	Perspective Piece: The Economic Case for Combating Malaria	AMERICAN JOURNAL OF TROPICAL MEDICINE AND HYGIENE	4	1	Green OA article	Green OA	1	Purdy-M	Purdy	Mark	Author, Reprint Author	1	ACCENTURE-INST-HIGH-PERFORMANCE	ACCENTURE-INST-HIGH-PERFORMANCE	ACCENTURE-INST-HIGH-PERFORMANCE	Company	Company	0	0	0	0	0	1	0	0	1	0	0	0	0	0	0	0	0	0	0	0	0	0	0	0	Article
51415012	The implications of unconventional drilling for natural gas: a global public health concern	PUBLIC HEALTH	2	2	Green OA article	Green OA	1	Finkel-ML	Finkel	M. L.	Author, Reprint Author	1	WEILL-CORNELL-MED-COLL	CORNELL-UNIV	CORNELL-UNIV	University	University - Rank 001-025	0	0	0	0	0	1	0	0	0	0	0	0	0	0	1	0	0	0	0	0	0	1	1	0	Review
51437307	The wealth of nations and the dissemination of cardiovascular research	INTERNATIONAL JOURNAL OF CARDIOLOGY	16	14	Hybrid article	Hybrid	1	Winnik-S	Winnik	Stephan	Author, Reprint Author	1	UNIV-ZURICH-HOSP	UNIV-ZURICH	UNIV-ZURICH-HOSP	Hospital	Hospital	0	3300	0	0	0	0	1	0	0	0	1	0	0	0	0	0	0	0	0	0	0	0	0	1	Article
51437459	Population, development, and climate change: links and effects on human health	LANCET	4	5	Green OA article	Green OA	1	Stephenson-J	Stephenson	Judith	Author, Reprint Author	1	UCL	UCL	UCL	University	University - Rank 001-025	0	0	0	0	0	1	0	0	0	0	0	0	0	0	1	0	0	0	0	0	0	1	1	0	Review
51448752	Global Prevalence of Vision Impairment and Blindness Magnitude and Temporal Trends, 1990-2010	OPHTHALMOLOGY	12	12	Green OA article	Green OA	1	Stevens-GA	Stevens	Gretchen A.	Author	1	WHO	WHO	WHO	Non-profit	Non-profit	0	0	0	0	0	1	0	0	0	0	0	1	0	0	0	0	0	0	0	0	0	0	0	0	Article
51453130	Early implementation of WHO recommendations for the retention of health workers in remote and rural areas	BULLETIN OF THE WORLD HEALTH ORGANIZATION	7	7	Gold OA article (non-APC)	Gold OA	1	Buchan-J	Buchan	James	Author	1	QUEEN-MARGARET-UNIV	QUEEN-MARGARET-UNIV	QUEEN-MARGARET-UNIV	University	University: Unranked	0	0	0	0	1	0	0	0	0	0	0	0	0	0	0	0	0	0	0	0	1	1	0	0	Article
51453131	Why do health labour market forces matter?	BULLETIN OF THE WORLD HEALTH ORGANIZATION	6	4	Gold OA article (non-APC)	Gold OA	1	McPake-B	McPake	Barbara	Author	1	QUEEN-MARGARET-UNIV	QUEEN-MARGARET-UNIV	QUEEN-MARGARET-UNIV	University	University: Unranked	0	0	0	0	1	0	0	0	0	0	0	0	0	0	0	0	0	0	0	0	1	1	0	0	Article
51453132	Community health workers for universal health-care coverage: from fragmentation to synergy	BULLETIN OF THE WORLD HEALTH ORGANIZATION	10	8	Gold OA article (non-APC)	Gold OA	1	Tulenko-K	Tulenko	Kate	Author, Reprint Author	1	CAPACITYPLUS	CAPACITYPLUS	CAPACITYPLUS	Non-profit	Non-profit	0	0	0	0	1	0	0	0	0	0	0	1	0	0	0	0	0	0	0	0	0	0	0	0	Article
51463445	Global Comparators Project: International Comparison of Hospital Outcomes Using Administrative Data	HEALTH SERVICES RESEARCH	5	4	Green OA article	Green OA	1	Bottle-A	Bottle	Alex	Author, Reprint Author	1	UNIV-LONDON-IMPERIAL-COLL-SCI-TECHNOL-&-MED	UNIV-LONDON-IMPERIAL-COLL-SCI-TECHNOL-&-MED	UNIV-LONDON-IMPERIAL-COLL-SCI-TECHNOL-&-MED	University	University - Rank 001-025	0	0	0	0	0	1	0	0	0	0	0	0	0	0	1	0	0	0	0	0	0	1	1	0	Article
51486308	Pediatric Global Health Education: Correlation of Website Information and Curriculum	JOURNAL OF PEDIATRICS	5	3	Toll access article	Toll access	1	Yaeger-JP	Yaeger	Jeffrey P.	Author, Reprint Author	1	JOHNS-HOPKINS-UNIV	JOHNS-HOPKINS-UNIV	JOHNS-HOPKINS-UNIV	University	University - Rank 001-025	0	0	0	0	0	0	0	1	0	0	0	0	0	0	1	0	0	0	0	0	0	1	1	0	Article
51523491	The burden of stomach cancer in indigenous populations: a systematic review and global assessment	GUT	6	4	Green OA article	Green OA	1	Arnold-M	Arnold	Melina	Author, Reprint Author	1	ERASMUS-UNIV	ERASMUS-UNIV	ERASMUS-UNIV	University	University - Rank 051-100	0	0	0	0	0	1	0	0	0	0	0	0	0	0	0	0	1	0	0	0	0	1	0	0	Article
51523525	Prevalence of comorbidities in rheumatoid arthritis and evaluation of their monitoring: results of an international, cross-sectional study (COMORA)	ANNALS OF THE RHEUMATIC DISEASES	24	27	Green OA article	Green OA	1	Dougados-M	Dougados	Maxime	Author, Reprint Author	1	PARIS-DESCARTES-UNIV	PARIS-DESCARTES-UNIV	PARIS-DESCARTES-UNIV	University	University - Rank 201-500	0	0	0	0	0	1	0	0	0	0	0	0	0	0	0	0	0	0	1	0	0	1	0	0	Article
51541196	Forgotten, not neglected: viral hepatitis in resource-limited settings, recall for action	LIVER INTERNATIONAL	4	4	Toll access article	Toll access	1	Lemoine-M	Lemoine	Maud	Author, Reprint Author	1	GAMBIA-UNIT	GAMBIA-UNIT	GAMBIA-UNIT	Research institute	Research Institute	0	0	0	0	0	0	0	1	0	0	0	0	1	0	0	0	0	0	0	0	0	0	0	0	Article
51557465	Progress in Global Surveillance and Response Capacity 10 Years after Severe Acute Respiratory Syndrome	EMERGING INFECTIOUS DISEASES	4	3	Gold OA article (non-APC)	Gold OA	1	Braden-CR	Braden	Christopher R.	Author	1	CTR-DIS-CONTROL-&-PREVENT	CDC	CDC	Government	Government	0	0	0	0	1	0	0	0	0	1	0	0	0	0	0	0	0	0	0	0	0	0	0	0	Article
51557546	The New Global Health	EMERGING INFECTIOUS DISEASES	4	1	Gold OA article (non-APC)	Gold OA	1	DeCock-KM	De Cock	Kevin M.	Author, Reprint Author	1	CTR-DIS-CONTROL-&-PREVENT	CDC	CDC	Government	Government	0	0	0	0	1	0	0	0	0	1	0	0	0	0	0	0	0	0	0	0	0	0	0	0	Article
51565211	Global health 2035: a world converging within a generation	LANCET	25	24	Green OA article	Green OA	1	Jamison-DT	Jamison	Dean T.	Author	1	UNIV-WASHINGTON	UNIV-WASHINGTON	UNIV-WASHINGTON	University	University - Rank 026-050	0	0	0	0	0	1	0	0	0	0	0	0	0	0	0	1	0	0	0	0	0	1	1	0	Review
51567792	Limitations of the Millennium Development Goals: a literature review	GLOBAL PUBLIC HEALTH	3	6	Green OA article	Green OA	1	Fehling-M	Fehling	Maya	Author, Reprint Author	1	UNIV-MED-BERLIN	FREE-UNIV-BERLIN	FREE-UNIV-BERLIN	University	University - Rank 051-100	0	0	0	0	0	1	0	0	0	0	0	0	0	0	0	0	1	0	0	0	0	1	0	0	Article
51582220	Diarrhoeal diseases and the global health agenda: measuring and changing priority	HEALTH POLICY AND PLANNING	3	2	Hybrid article	Hybrid	1	Bump-JB	Bump	Jesse B.	Author, Reprint Author	1	GEORGETOWN-UNIV	GEORGETOWN-UNIV	GEORGETOWN-UNIV	University	University - Rank 101-200	0	2400	0	0	0	0	1	0	0	0	0	0	0	0	0	0	0	1	0	0	0	1	0	1	Article
51591143	The complex relationships involved in global health: a qualitative description	BMC MEDICAL EDUCATION	3	4	Gold OA article (APC)	Gold OA	1	McCarthy-AE	McCarthy	Anne E.	Author, Reprint Author	1	UNIV-OTTAWA	UNIV-OTTAWA	UNIV-OTTAWA	University	University - Rank 201-500	0	2145	0	1	0	0	0	0	0	0	0	0	0	0	0	0	0	0	1	0	0	1	0	1	Article
51596859	Quantitative and qualitative differences in use and trends of hematopoietic stem cell transplantation: a Global Observational Study	HAEMATOLOGICA	15	11	Gold OA article (APC)	Gold OA	1	Gratwohl-A	Gratwohl	Alois	Author	1	UNIV-BASEL-HOSP	UNIV-BASEL	UNIV-BASEL-HOSP	Hospital	Hospital	0	1829.7	0	1	0	0	0	0	0	0	1	0	0	0	0	0	0	0	0	0	0	0	0	1	Article
51597459	Strengthening the evidence-policy interface for patient safety: enhancing global health through hospital partnerships	GLOBALIZATION AND HEALTH	9	4	Gold OA article (APC)	Gold OA	1	Syed-SB	Syed	Shamsuzzoha B.	Author, Reprint Author	1	WHO	WHO	WHO	Non-profit	Non-profit	0	2145	0	1	0	0	0	0	0	0	0	1	0	0	0	0	0	0	0	0	0	0	0	1	Article
51597779	The evolution of health warning labels on cigarette packs: the role of precedents, and tobacco industry strategies to block diffusion	TOBACCO CONTROL	3	3	Green OA article	Green OA	1	Hiilamo-H	Hiilamo	Heikki	Author	1	SOCIAL-INSURANCE-INST-FINLAND	SOCIAL-INSURANCE-INST-FINLAND	SOCIAL-INSURANCE-INST-FINLAND	Government	Government	0	0	0	0	0	1	0	0	0	1	0	0	0	0	0	0	0	0	0	0	0	0	0	0	Article
51599029	The Role of Graduate Medical Education in Global Health: Proceedings From the 2013 Academic Emergency Medicine Consensus Conference	ACADEMIC EMERGENCY MEDICINE	8	10	Hybrid article	Hybrid	1	Tupesis-JP	Tupesis	Janis P.	Author, Reprint Author	1	UNIV-WISCONSIN	UNIV-WISCONSIN	UNIV-WISCONSIN	University	University - Rank 026-050	0	3000	0	0	0	0	1	0	0	0	0	0	0	0	0	1	0	0	0	0	0	1	1	1	Article
51599030	Global Health and Emergency Care: An Undergraduate Medical Education Consensus-based Research Agenda	ACADEMIC EMERGENCY MEDICINE	8	9	Hybrid article	Hybrid	1	Martin-IBK	Martin	Ian B. K.	Author, Reprint Author	1	UNIV-N-CAROLINA	UNIV-N-CAROLINA	UNIV-N-CAROLINA	University	University - Rank 051-100	0	3000	0	0	0	0	1	0	0	0	0	0	0	0	0	0	1	0	0	0	0	1	0	1	Article
51599031	Global Health and Emergency Care: A Postgraduate Medical Education Consensus-based Research Agenda	ACADEMIC EMERGENCY MEDICINE	9	11	Hybrid article	Hybrid	1	Martin-IBK	Martin	Ian B. K.	Author, Reprint Author	1	UNIV-N-CAROLINA	UNIV-N-CAROLINA	UNIV-N-CAROLINA	University	University - Rank 051-100	0	3000	0	0	0	0	1	0	0	0	0	0	0	0	0	0	1	0	0	0	0	1	0	1	Article
51599033	Research Priorities for Data Collection and Management Within Global Acute and Emergency Care Systems	ACADEMIC EMERGENCY MEDICINE	8	9	Hybrid article	Hybrid	1	Reynolds-TA	Reynolds	Teri A.	Author, Reprint Author	1	UNIV-CALIF-SAN-FRANCISCO	UCSF	UCSF	University	University - Rank 001-025	0	3000	0	0	0	0	1	0	0	0	0	0	0	0	1	0	0	0	0	0	0	1	1	1	Article
51599035	Emergency Care Research Funding in the Global Health Context: Trends, Priorities, and Future Directions	ACADEMIC EMERGENCY MEDICINE	10	10	Hybrid article	Hybrid	1	Vu-A	Vu	Alexander	Author, Reprint Author	1	JOHNS-HOPKINS-UNIV	JOHNS-HOPKINS-UNIV	JOHNS-HOPKINS-UNIV	University	University - Rank 001-025	0	3000	0	0	0	0	1	0	0	0	0	0	0	0	1	0	0	0	0	0	0	1	1	1	Article
51599037	Clinical and Translational Research in Global Health and Emergency Care: A Research Agenda	ACADEMIC EMERGENCY MEDICINE	9	8	Hybrid article	Hybrid	1	Runyon-MS	Runyon	Michael S.	Author, Reprint Author	1	CAROLINAS-MED-CTR	CAROLINAS-MED-CTR	CAROLINAS-MED-CTR	Hospital	Hospital	0	3000	0	0	0	0	1	0	0	0	1	0	0	0	0	0	0	0	0	0	0	0	0	1	Article
51599039	Global Health and Emergency Care: A Resuscitation Research Agenda-Part 1	ACADEMIC EMERGENCY MEDICINE	20	23	Hybrid article	Hybrid	1	Aufderheide-TP	Aufderheide	Tom P.	Author, Reprint Author	1	MED-COLL-WISCONSIN	MED-COLL-WISCONSIN	MED-COLL-WISCONSIN	University	University: Unranked	0	3000	0	0	0	0	1	0	0	0	0	0	0	0	0	0	0	0	0	0	1	1	0	1	Article
51599043	Society for Academic Emergency Medicine's Global Emergency Medicine Academy: Global Health Elective Code of Conduct	ACADEMIC EMERGENCY MEDICINE	8	10	Hybrid article	Hybrid	1	Hansoti-B	Hansoti	Bhakti	Author, Reprint Author	1	JOHNS-HOPKINS-UNIV	JOHNS-HOPKINS-UNIV	JOHNS-HOPKINS-UNIV	University	University - Rank 001-025	0	3000	0	0	0	0	1	0	0	0	0	0	0	0	1	0	0	0	0	0	0	1	1	1	Article
51600264	Global progress towards eliminating gastrointestinal helminth infections	CURRENT OPINION IN GASTROENTEROLOGY	3	1	Toll access article	Toll access	1	McCarty-TR	McCarty	Thomas R.	Author	1	BAYLOR-COLL-MED	BAYLOR-COLL-MED	BAYLOR-COLL-MED	University	University: Unranked	0	0	0	0	0	0	0	1	0	0	0	0	0	0	0	0	0	0	0	0	1	1	0	0	Review
51608998	Global stroke statistics	INTERNATIONAL JOURNAL OF STROKE	7	6	Green OA article	Green OA	1	Thrift-AG	Thrift	Amanda G.	Author, Reprint Author	1	MONASH-UNIV	MONASH-UNIV	MONASH-UNIV	University	University - Rank 051-100	0	0	0	0	0	1	0	0	0	0	0	0	0	0	0	0	1	0	0	0	0	1	0	0	Article
51637912	Late Life Depression A Global Problem with Few Resources	PSYCHIATRIC CLINICS OF NORTH AMERICA	2	2	Green OA article	Green OA	1	McCall-WV	McCall	W. Vaughn	Author, Reprint Author	1	GEORGIA-REGENTS-UNIV	GEORGIA-REGENTS-UNIV	GEORGIA-REGENTS-UNIV	University	University: Unranked	0	0	0	0	0	1	0	0	0	0	0	0	0	0	0	0	0	0	0	0	1	1	0	0	Article
51647723	Improving global health governance to combat counterfeit medicines: a proposal for a UNODC-WHO-Interpol trilateral mechanism	BMC MEDICINE	2	3	Gold OA article (APC)	Gold OA	1	Mackey-TK	Mackey	Tim K.	Author, Reprint Author	1	UNIV-CALIF-SAN-DIEGO	UNIV-CALIF-SAN-DIEGO	UNIV-CALIF-SAN-DIEGO	University	University - Rank 026-050	0	2785	0	1	0	0	0	0	0	0	0	0	0	0	0	1	0	0	0	0	0	1	1	1	Article
51745017	Temporal Trends in the Incidence of Osteoporotic Fractures	CURRENT OSTEOPOROSIS REPORTS	4	4	Toll access article	Toll access	1	Morin-SN	Morin	S. N.	Author, Reprint Author	1	MUHC	MCGILL-UNIV	MCGILL-UNIV-HOSP	Hospital	Hospital	0	0	0	0	0	0	0	1	0	0	1	0	0	0	0	0	0	0	0	0	0	0	0	0	Article
51769712	Development and Evaluation of Global Child Health Educational Modules	PEDIATRICS	17	17	Delayed OA article	Delayed OA	1	Audcent-TA	Audcent	Tobey A.	Author, Reprint Author	1	CHILDRENS-HOSP-EASTERN-ONTARIO	CHILDRENS-HOSP-EASTERN-ONTARIO	CHILDRENS-HOSP-EASTERN-ONTARIO	Hospital	Hospital	0	0	1	0	0	0	0	0	0	0	1	0	0	0	0	0	0	0	0	0	0	0	0	0	Article
51788047	Smoking Prevalence and Cigarette Consumption in 187 Countries, 1980-2012	JAMA-JOURNAL OF THE AMERICAN MEDICAL ASSOCIATION	12	2	Delayed OA article	Delayed OA	1	Ng-M	Marie Ng		Author	1	UNIV-WASHINGTON	UNIV-WASHINGTON	UNIV-WASHINGTON	University	University - Rank 026-050	0	0	1	0	0	0	0	0	0	0	0	0	0	0	0	1	0	0	0	0	0	1	1	0	Article
51800915	Is Health Aid Reaching the Poor? Analysis of Household Data from Aid Recipient Countries	PLOS ONE	1	3	Gold OA article (APC)	Gold OA	1	Bendavid-E	Bendavid	Eran	Author, Reprint Author	1	STANFORD-UNIV	STANFORD-UNIV	STANFORD-UNIV	University	University - Rank 001-025	1	1495	0	1	0	0	0	0	0	0	0	0	0	0	1	0	0	0	0	0	0	1	1	1	Article
51805239	Alcoholic liver disease and pancreatitis: Global health problems being addressed by the US National Institute on Alcohol Abuse and Alcoholism	JOURNAL OF GASTROENTEROLOGY AND HEPATOLOGY	2	1	Green OA article	Green OA	1	Warren-KR	Warren	Kenneth R.	Author, Reprint Author	1	NIAAA	NIAAA	NIAAA	Government	Government	0	0	0	0	0	1	0	0	0	1	0	0	0	0	0	0	0	0	0	0	0	0	0	0	Review
51825312	Beyond the Bench and the Bedside: Economic and Health Systems Dimensions of Global Childhood Cancer Outcomes	PEDIATRIC BLOOD & CANCER	5	10	Toll access article	Toll access	1	Denburg-AE	Denburg	Avram E.	Author, Reprint Author	1	HOSP-SICK-CHILDREN	HOSP-SICK-CHILDREN	HOSP-SICK-CHILDREN	Hospital	Hospital	0	0	0	0	0	0	0	1	0	0	1	0	0	0	0	0	0	0	0	0	0	0	0	0	Article
51848830	Sleeping with the enemy: the United Nations Development Programme and its position on the non-communicable disease epidemic	TROPICAL MEDICINE & INTERNATIONAL HEALTH	3	1	Hybrid article	Hybrid	1	Jacob-AG	Jacob	Anil G.	Author, Reprint Author	1	INT-UNION-TB-&-LUNG-DIS	INT-UNION-AGAINST-TUBERCULOSIS-&-LUNG-DIS-UNION	INT-UNION-AGAINST-TUBERCULOSIS-&-LUNG-DIS-UNION	Research institute	Research Institute	0	3000	0	0	0	0	1	0	0	0	0	0	1	0	0	0	0	0	0	0	0	0	0	1	Article
51849207	Estimating global and regional morbidity from acute bacterial meningitis in children: assessment of the evidence	CROATIAN MEDICAL JOURNAL	6	4	Gold OA article (non-APC)	Gold OA	1	Luksic-I	Luksic	Ivana	Author, Reprint Author	1	INST-PUBL-HLTH-DR-ANDRIJA-STAMPAR	INST-PUBL-HLTH-DR-ANDRIJA-STAMPAR	INST-PUBL-HLTH-DR-ANDRIJA-STAMPAR	Research institute	Research Institute	0	0	0	0	1	0	0	0	0	0	0	0	1	0	0	0	0	0	0	0	0	0	0	0	Article
51849208	An estimate of asthma prevalence in Africa: a systematic analysis	CROATIAN MEDICAL JOURNAL	4	1	Gold OA article (non-APC)	Gold OA	1	Adeloye-D	Adeloye	Davies	Author, Reprint Author	1	UNIV-EDINBURGH	UNIV-EDINBURGH	UNIV-EDINBURGH	University	University - Rank 026-050	0	0	0	0	1	0	0	0	0	0	0	0	0	0	0	1	0	0	0	0	0	1	1	0	Article
51849209	Estimating the incidence of colorectal cancer in South East Asia	CROATIAN MEDICAL JOURNAL	4	2	Gold OA article (non-APC)	Gold OA	1	Kokki-I	Kokki	Inka	Author	1	UNIV-EDINBURGH	UNIV-EDINBURGH	UNIV-EDINBURGH	University	University - Rank 026-050	0	0	0	0	1	0	0	0	0	0	0	0	0	0	0	1	0	0	0	0	0	1	1	0	Article
51852377	Spectrometric analysis of mercury content in 549 skin-lightening products: Is mercury toxicity a hidden global health hazard?	JOURNAL OF THE AMERICAN ACADEMY OF DERMATOLOGY	9	8	Toll access article	Toll access	1	Hamann-CR	Hamann	Carsten R.	Author, Reprint Author	1	LOMA-LINDA-UNIV	LOMA-LINDA-UNIV	LOMA-LINDA-UNIV	University	University: Unranked	0	0	0	0	0	0	0	1	0	0	0	0	0	0	0	0	0	0	0	0	1	1	0	0	Article
51852620	Mortality landscape in the Global Burden of Diseases, Injuries and Risk Factors Study	EUROPEAN JOURNAL OF INTERNAL MEDICINE	3	5	Toll access article	Toll access	1	Bikbov-B	Bikbov	Boris	Author, Reprint Author	1	AI-EVDOKIMOV-MOSCOW-STATE-UNIV-MED-&-DENT	AI-EVDOKIMOV-MOSCOW-STATE-UNIV-MED-&-DENT	AI-EVDOKIMOV-MOSCOW-STATE-UNIV-MED-&-DENT	University	University: Unranked	0	0	0	0	0	0	0	1	0	0	0	0	0	0	0	0	0	0	0	0	1	1	0	0	Review
51855957	PRIORITY SETTING IN GLOBAL HEALTH: TOWARDS A MINIMUM DALY VALUE	HEALTH ECONOMICS	1	2	Toll access article	Toll access	1	Drake-T	Drake	Tom	Author, Reprint Author	1	LONDON-SCH-HYG-&-TROP-MED	UCL	UCL	University	University - Rank 001-025	1	0	0	0	0	0	0	1	0	0	0	0	0	0	1	0	0	0	0	0	0	1	1	0	Article
51864885	Global Health Educational Engagement-A Tale of Two Models	ACADEMIC MEDICINE	5	5	Toll access article	Toll access	1	Rassiwala-J	Rassiwala	Jasmine	Author	1	NORTHWESTERN-UNIV	NORTHWESTERN-UNIV	NORTHWESTERN-UNIV	University	University - Rank 001-025	0	0	0	0	0	0	0	1	0	0	0	0	0	0	1	0	0	0	0	0	0	1	1	0	Article
51864906	Educational Objectives for International Medical Electives: A Literature Review	ACADEMIC MEDICINE	3	4	Green OA article	Green OA	1	Cherniak-WA	Cherniak	William A.	Author, Reprint Author	1	UNIV-TORONTO	UNIV-TORONTO	UNIV-TORONTO	University	University - Rank 001-025	0	0	0	0	0	1	0	0	0	0	0	0	0	0	1	0	0	0	0	0	0	1	1	0	Review
51868667	Universal health coverage: necessary but not sufficient	REPRODUCTIVE HEALTH MATTERS	7	5	Green OA article	Green OA	1	Fried-ST	Fried	Susana T.	Author, Reprint Author	1	UNDP	UNDP	UNDP	Non-profit	Non-profit	0	0	0	0	0	1	0	0	0	0	0	1	0	0	0	0	0	0	0	0	0	0	0	0	Article
51868669	Embedding sexual and reproductive health and rights in a transformational development framework: lessons learned from the MDG targets and indicators	REPRODUCTIVE HEALTH MATTERS	2	3	Green OA article	Green OA	1	Yamin-AE	Yamin	Alicia Ely	Author, Reprint Author	1	HARVARD-UNIV	HARVARD-UNIV	HARVARD-UNIV	University	University - Rank 001-025	0	0	0	0	0	1	0	0	0	0	0	0	0	0	1	0	0	0	0	0	0	1	1	0	Article
51868671	Ad global, but think local: accountability at the frontlines	REPRODUCTIVE HEALTH MATTERS	2	1	Toll access article	Toll access	1	Freedman-LP	Freedman	Lynn P.	Author	1	COLUMBIA-UNIV	COLUMBIA-UNIV	COLUMBIA-UNIV	University	University - Rank 001-025	0	0	0	0	0	0	0	1	0	0	0	0	0	0	1	0	0	0	0	0	0	1	1	0	Article
51877451	Global and regional burden of stroke during 1990-2010: findings from the Global Burden of Disease Study 2010	LANCET	20	21	Green OA article	Green OA	1	Feigin-VL	Feigin	Valery L.	Author, Reprint Author	1	AUCKLAND-UWNIVERS-TECHNOL	AUCKLAND-TECH-UNIV	AUCKLAND-TECH-UNIV	University	University - Rank 501+	0	0	0	0	0	1	0	0	0	0	0	0	0	0	0	0	0	0	0	1	0	1	0	0	Article
51885488	Research Review: Epidemiological modelling of attention-deficit/hyperactivity disorder and conduct disorder for the Global Burden of Disease Study 2010	JOURNAL OF CHILD PSYCHOLOGY AND PSYCHIATRY AND ALLIED DISCIPLINES	8	9	Toll access article	Toll access	1	Erskine-HE	Erskine	Holly E.	Author, Reprint Author	1	UNIV-QUEENSLAND	UNIV-QUEENSLAND	UNIV-QUEENSLAND	University	University - Rank 051-100	0	0	0	0	0	0	0	1	0	0	0	0	0	0	0	0	1	0	0	0	0	1	0	0	Review
51887129	Empirical impact evaluation of the WHO Global Code of Practice on the International Recruitment of Health Personnel in Australia, Canada, UK and USA	GLOBALIZATION AND HEALTH	2	4	Gold OA article (APC)	Gold OA	1	Edge-JS	Edge	Jennifer S.	Author	1	HARVARD-UNIV	HARVARD-UNIV	HARVARD-UNIV	University	University - Rank 001-025	0	2145	0	1	0	0	0	0	0	0	0	0	0	0	1	0	0	0	0	0	0	1	1	1	Article
51887132	Value innovation: an important aspect of global surgical care	GLOBALIZATION AND HEALTH	3	4	Gold OA article (APC)	Gold OA	1	Cotton-M	Cotton	Michael	Author, Reprint Author	1	INT-COLLABORAT-ESSENTIAL-SURG-ICES	INT-COLLABORAT-ESSENTIAL-SURG-ICES	INT-COLLABORAT-ESSENTIAL-SURG-ICES	Non-profit	Non-profit	0	2145	0	1	0	0	0	0	0	0	0	1	0	0	0	0	0	0	0	0	0	0	0	1	Article
51887490	A Place for All at the Global Health Table: A Case Study about Creating an Interprofessional Global Health Project	JOURNAL OF LAW MEDICINE & ETHICS	1	2	Toll access article	Toll access	1	Rowthorn-V	Rowthorn	Virginia	Author, Reprint Author	1	UNIV-MARYLAND	UNIV-MARYLAND	UNIV-MARYLAND	University	University - Rank 051-100	1	0	0	0	0	0	0	1	0	0	0	0	0	0	0	0	1	0	0	0	0	1	0	0	Article
51888822	Public health lives: Gro Harlem Brundtland	PUBLIC HEALTH	2	2	Toll access article	Toll access	1	Yach-D	Yach	D.	Author, Reprint Author	1	VITAL-INST	VITAL-INST	VITAL-INST	Non-profit	Non-profit	0	0	0	0	0	0	0	1	0	0	0	1	0	0	0	0	0	0	0	0	0	0	0	0	Review
51888823	Leveraging non-binding instruments for global health governance: reflections from the Global AIDS Reporting Mechanism for WHO reform	PUBLIC HEALTH	5	2	Toll access article	Toll access	1	Taylor-AL	Taylor	A. L.	Author, Reprint Author	1	GEORGETOWN-UNIV	GEORGETOWN-UNIV	GEORGETOWN-UNIV	University	University - Rank 101-200	0	0	0	0	0	0	0	1	0	0	0	0	0	0	0	0	0	1	0	0	0	1	0	0	Review
51888824	China's position in negotiating the Framework Convention on Tobacco Control and the revised International Health Regulations	PUBLIC HEALTH	1	2	Toll access article	Toll access	1	Huang-Y	Huang	Y.	Author, Reprint Author	1	SETON-HALL-UNIV	SETON-HALL-UNIV	SETON-HALL-UNIV	University	University: Unranked	1	0	0	0	0	0	0	1	0	0	0	0	0	0	0	0	0	0	0	0	1	1	0	0	Article
51888825	WHO's role in the global health system: what can be learned from global R&D debates?	PUBLIC HEALTH	1	2	Toll access article	Toll access	1	Moon-S	Moon	Suerie	Author, Reprint Author	1	HARVARD-GLOBAL-HLTH-INST	HARVARD-UNIV	HARVARD-MED-SCH	Hospital	Hospital	1	0	0	0	0	0	0	1	0	0	1	0	0	0	0	0	0	0	0	0	0	0	0	0	Review
51888826	Great expectations for the World Health Organization: a Framework Convention on Global Health to achieve universal health coverage	PUBLIC HEALTH	6	5	Toll access article	Toll access	1	Ooms-G	Ooms	G.	Author, Reprint Author	1	INST-TROP-MED	INST-TROP-MED	INST-TROP-MED	Research institute	Research Institute	0	0	0	0	0	0	0	1	0	0	0	0	1	0	0	0	0	0	0	0	0	0	0	0	Review
51888827	The evolution of human rights in World Health Organization policy and the future of human rights through global health governance	PUBLIC HEALTH	2	2	Toll access article	Toll access	1	Meier-BM	Meier	B. M.	Author, Reprint Author	1	UNIV-N-CAROLINA	UNIV-N-CAROLINA	UNIV-N-CAROLINA	University	University - Rank 051-100	0	0	0	0	0	0	0	1	0	0	0	0	0	0	0	0	1	0	0	0	0	1	0	0	Review
51893659	The global burden of foodborne parasitic diseases: an update	TRENDS IN PARASITOLOGY	10	12	Toll access article	Toll access	1	Torgerson-PR	Torgerson	Paul R.	Author, Reprint Author	1	UNIV-ZURICH	UNIV-ZURICH	UNIV-ZURICH	University	University - Rank 101-200	0	0	0	0	0	0	0	1	0	0	0	0	0	0	0	0	0	1	0	0	0	1	0	0	Review
51893661	Impacts of globalisation on foodborne parasites	TRENDS IN PARASITOLOGY	5	4	Toll access article	Toll access	1	Robertson-LJ	Robertson	Lucy J.	Author, Reprint Author	1	NORWEGIAN-SCH-VET-SCI	NORWEGIAN-SCH-VET-SCI	NORWEGIAN-SCH-VET-SCI	University	University: Unranked	0	0	0	0	0	0	0	1	0	0	0	0	0	0	0	0	0	0	0	0	1	1	0	0	Review
51900783	The annual global economic burden of heart failure	INTERNATIONAL JOURNAL OF CARDIOLOGY	5	1	Green OA article	Green OA	1	Cook-C	Cook	Christopher	Author, Reprint Author	1	UNIV-LONDON-IMPERIAL-COLL-SCI-TECHNOL-&-MED	UNIV-LONDON-IMPERIAL-COLL-SCI-TECHNOL-&-MED	UNIV-LONDON-IMPERIAL-COLL-SCI-TECHNOL-&-MED	University	University - Rank 001-025	0	0	0	0	0	1	0	0	0	0	0	0	0	0	1	0	0	0	0	0	0	1	1	0	Article
51912897	SEPSIS AS A GLOBAL HEALTH PROBLEM-WHY WE NEED A GLOBAL SEPSIS ALLIANCE	SHOCK	2	1	Toll access article	Toll access	1	Stehr-SN	Stehr	Sebastian N.	Author	1	UNIV-JENA	UNIV-JENA	UNIV-JENA	University	University: Unranked	0	0	0	0	0	0	0	1	0	0	0	0	0	0	0	0	0	0	0	0	1	1	0	0	Article
51916560	Challenges in Developing a Community-Based Program for Maltreated Children and Adolescents in Brazil	PSYCHIATRIC SERVICES	4	2	Toll access article	Toll access	1	Scivoletto-S	Scivoletto	Sandra	Author, Reprint Author	1	UNIV-SAO-PAULO	UNIV-SAO-PAULO	UNIV-SAO-PAULO	University	University - Rank 201-500	0	0	0	0	0	0	0	1	0	0	0	0	0	0	0	0	0	0	1	0	0	1	0	0	Article
51934469	Burden of Depressive Disorders by Country, Sex, Age, and Year: Findings from the Global Burden of Disease Study 2010	PLOS MEDICINE	8	5	Gold OA article (APC)	Gold OA	1	Ferrari-AJ	Ferrari	Alize J.	Author, Reprint Author	1	UNIV-QUEENSLAND	UNIV-QUEENSLAND	UNIV-QUEENSLAND	University	University - Rank 051-100	0	2900	0	1	0	0	0	0	0	0	0	0	0	0	0	0	1	0	0	0	0	1	0	1	Article
51940016	Peace Through a Healing Transformation of Human Dignity Possibilities and Dilemmas in Global Health and Peace	ADVANCES IN NURSING SCIENCE	1	3	Toll access article	Toll access	1	Perry-DJ	Perry	Donna J.	Author, Reprint Author	1	UNIV-MASSACHUSETTS-WORCESTER	UNIV-MASSACHUSETTS	UNIV-MASSACHUSETTS	University	University - Rank 101-200	1	0	0	0	0	0	0	1	0	0	0	0	0	0	0	0	0	1	0	0	0	1	0	0	Article
51942687	Scope of Global Health Training in US Obstetrics and Gynecology Residency Programs	OBSTETRICS AND GYNECOLOGY	6	9	Green OA article	Green OA	1	Hung-KJ	Hung	Kristin J.	Author, Reprint Author	1	BETH-ISRAEL-DEACONESS-MED-CTR	BETH-ISRAEL-DEACONESS-MED-CTR	BETH-ISRAEL-DEACONESS-MED-CTR	Hospital	Hospital	1	0	0	0	0	1	0	0	0	0	1	0	0	0	0	0	0	0	0	0	0	0	0	0	Article
51969017	International Committee for Monitoring Assisted Reproductive Technology: world report on assisted reproductive technology, 2005	FERTILITY AND STERILITY	7	9	Toll access article	Toll access	1	ZegersHochschild-F	Zegers-Hochschild	Fernando	Author, Reprint Author	1	UNIV-DIEGO-PORTALES	UNIV-DIEGO-PORTALES	UNIV-DIEGO-PORTALES	University	University - Rank 501+	0	0	0	0	0	0	0	1	0	0	0	0	0	0	0	0	0	0	0	1	0	1	0	0	Article
51978353	Why Culture Matters in Health Interventions: Lessons From HIV/AIDS Stigma and NCDs	HEALTH EDUCATION & BEHAVIOR	3	3	Toll access article	Toll access	1	Airhihenbuwa-CO	Airhihenbuwa	Collins O.	Author, Reprint Author	1	PENN-STATE-UNIV	PENN-STATE-UNIV	PENN-STATE-UNIV	University	University - Rank 051-100	0	0	0	0	0	0	0	1	0	0	0	0	0	0	0	0	1	0	0	0	0	1	0	0	Article
51988238	Student Perceptions About the Mission of Dental Schools to Advance Global Dentistry and Philanthropy	JOURNAL OF DENTAL EDUCATION	5	7	Hybrid article	Hybrid	1	Ivanoff-CS	Ivanoff	Chris S.	Author, Reprint Author	1	UNIV-TENNESSEE	UNIV-TENNESSEE	UNIV-TENNESSEE	University	University - Rank 201-500	0		0	0	0	0	1	0	0	0	0	0	0	0	0	0	0	0	1	0	0	1	0	1	Article
51988925	Indoor Air Pollution in Developing Countries: Research and Implementation Needs for Improvements in Global Public Health	AMERICAN JOURNAL OF PUBLIC HEALTH	4	2	Green OA article	Green OA	1	Gall-ET	Gall	Elliott T.	Author	1	UNIV-TEXAS-AUSTIN	UNIV-TEXAS-AUSTIN	UNIV-TEXAS-AUSTIN	University	University - Rank 026-050	0	0	0	0	0	1	0	0	0	0	0	0	0	0	0	1	0	0	0	0	0	1	1	0	Article
52007140	Rapidly Building Global Health Security Capacity - Uganda Demonstration Project, 2013	MMWR-MORBIDITY AND MORTALITY WEEKLY REPORT	23	9	Gold OA article (non-APC)	Gold OA	1	Borchert-JN	Borchert	Jeff N.	Author	1	CDC	CDC	CDC	Government	Government	0	0	0	0	1	0	0	0	0	1	0	0	0	0	0	0	0	0	0	0	0	0	0	0	Article
52010113	Trends in the Prevalence of Asthma	CHEST	1	2	Toll access article	Toll access	1	Sears-MR	Sears	Malcolm R.	Author, Reprint Author	1	MCMASTER-UNIV	MCMASTER-UNIV	MCMASTER-UNIV	University	University - Rank 101-200	1	0	0	0	0	0	0	1	0	0	0	0	0	0	0	0	0	1	0	0	0	1	0	0	Article
52013173	Socioeconomic Inequality in Disability Among Adults: A Multicountry Study Using the World Health Survey	AMERICAN JOURNAL OF PUBLIC HEALTH	8	4	Green OA article	Green OA	1	Hosseinpoor-AR	Hosseinpoor	Ahmad R.	Author	1	WORLD-HLTH-ORG	WHO	WHO	Non-profit	Non-profit	0	0	0	0	0	1	0	0	0	0	0	1	0	0	0	0	0	0	0	0	0	0	0	0	Article
52015301	Between Individual Agency and Structure in HIV Prevention: Understanding the Middle Ground of Social Practice	AMERICAN JOURNAL OF PUBLIC HEALTH	4	5	Green OA article	Green OA	1	Kippax-S	Kippax	Susan	Author	1	UNIV-NEW-S-WALES	UNIV-NEW-S-WALES	UNIV-NEW-S-WALES	University	University - Rank 051-100	0	0	0	0	0	1	0	0	0	0	0	0	0	0	0	0	1	0	0	0	0	1	0	0	Article
52015884	The methodology of population surveys of headache prevalence, burden and cost: Principles and recommendations from the Global Campaign against Headache	JOURNAL OF HEADACHE AND PAIN	11	18	Gold OA article (APC)	Gold OA	1	Stovner-LJ	Stovner	Lars Jacob	Author, Reprint Author	1	NORWEGIAN-UNIV-SCI-&-TECHNOL	NORWEGIAN-UNIV-SCI-&-TECHNOL	NORWEGIAN-UNIV-SCI-&-TECHNOL	University	University - Rank 201-500	0	1965	0	1	0	0	0	0	0	0	0	0	0	0	0	0	0	0	1	0	0	1	0	1	Article
52028769	The political origins of health inequity: prospects for change	LANCET	24	20	Green OA article	Green OA	1	Ottersen-OP	Ottersen	Ole Petter	Author, Reprint Author	1	UNIV-OSLO	UNIV-OSLO	UNIV-OSLO	University	University - Rank 101-200	0	0	0	0	0	1	0	0	0	0	0	0	0	0	0	0	0	1	0	0	0	1	0	0	Review
52031485	Global Control and Regional Elimination of Measles, 2000-2012	MMWR-MORBIDITY AND MORTALITY WEEKLY REPORT	8	3	Gold OA article (non-APC)	Gold OA	1	Perry-RT	Perry	Robert T.	Author	1	WHO	WHO	WHO	Non-profit	Non-profit	0	0	0	0	1	0	0	0	0	0	0	1	0	0	0	0	0	0	0	0	0	0	0	0	Article
52035060	Estimates of neonatal morbidities and disabilities at regional and global levels for 2010: introduction, methods overview, and relevant findings from the Global Burden of Disease study	PEDIATRIC RESEARCH	8	8	Green OA article	Green OA	1	Blencowe-H	Blencowe	Hannah	Author	1	LONDON-SCH-HYG-&-TROP-MED	UCL	UCL	University	University - Rank 001-025	0	0	0	0	0	1	0	0	0	0	0	0	0	0	1	0	0	0	0	0	0	1	1	0	Article
52035061	Preterm birth-associated neurodevelopmental impairment estimates at regional and global levels for 2010	PEDIATRIC RESEARCH	13	14	Green OA article	Green OA	1	Blencowe-H	Blencowe	Hannah	Author, Reprint Author	1	LONDON-SCH-HYG-&-TROP-MED	UCL	UCL	University	University - Rank 001-025	0	0	0	0	0	1	0	0	0	0	0	0	0	0	1	0	0	0	0	0	0	1	1	0	Article
52035062	Preterm-associated visual impairment and estimates of retinopathy of prematurity at regional and global levels for 2010	PEDIATRIC RESEARCH	5	6	Green OA article	Green OA	1	Blencowe-H	Blencowe	Hannah	Author, Reprint Author	1	LONDON-SCH-HYG-&-TROP-MED	UCL	UCL	University	University - Rank 001-025	0	0	0	0	0	1	0	0	0	0	0	0	0	0	1	0	0	0	0	0	0	1	1	0	Article
52035063	Intrapartum-related neonatal encephalopathy incidence and impairment at regional and global levels for 2010 with trends from 1990	PEDIATRIC RESEARCH	11	12	Green OA article	Green OA	1	Lee-ACC	Lee	Anne C. C.	Author, Reprint Author	1	BRIGHAM-&-WOMENS-HOSP	BRIGHAM-&-WOMENS-HOSP	BRIGHAM-&-WOMENS-HOSP	Hospital	Hospital	0	0	0	0	0	1	0	0	0	0	1	0	0	0	0	0	0	0	0	0	0	0	0	0	Article
52035065	Neonatal hyperbilirubinemia and Rhesus disease of the newborn: incidence and impairment estimates for 2010 at regional and global levels	PEDIATRIC RESEARCH	18	18	Green OA article	Green OA	1	Bhutani-VK	Bhutani	Vinod K.	Author, Reprint Author	1	HOSP-SICK-CHILDREN	HOSP-SICK-CHILDREN	HOSP-SICK-CHILDREN	Hospital	Hospital	0	0	0	0	0	1	0	0	0	0	1	0	0	0	0	0	0	0	0	0	0	0	0	0	Article
52038384	WHO Framework Convention on Tobacco Control in China: barriers, challenges and recommendations	GLOBAL HEALTH PROMOTION	3	3	Green OA article	Green OA	1	Hu-TW	Hu	Teh-Wei	Author	1	INST-PUBL-HLTH	INST-PUBL-HLTH	INST-PUBL-HLTH	Non-profit	Non-profit	0	0	0	0	0	1	0	0	0	0	0	1	0	0	0	0	0	0	0	0	0	0	0	0	Article
52040259	Young individuals with stroke: a cross sectional study of long-term disability associated with self-rated global health	BMC NEUROLOGY	3	4	Gold OA article (APC)	Gold OA	1	Palmcrantz-S	Palmcrantz	Susanne	Author, Reprint Author	1	KAROLINSKA-INST	KAROLINSKA-INST	KAROLINSKA-INST	University	University - Rank 026-050	0	2145	0	1	0	0	0	0	0	0	0	0	0	0	0	1	0	0	0	0	0	1	1	1	Article
52044218	Global Perspectives on Resilience in Children and Youth	CHILD DEVELOPMENT	1	1	Toll access article	Toll access	1	Masten-AS	Masten	Ann S.	Author, Reprint Author	1	UNIV-MINNESOTA	UNIV-MINNESOTA	UNIV-MINNESOTA	University	University - Rank 051-100	1	0	0	0	0	0	0	1	0	0	0	0	0	0	0	0	1	0	0	0	0	1	0	0	Article
52054538	Why the MDGs need good governance in pharmaceutical systems to promote global health	BMC PUBLIC HEALTH	3	2	Gold OA article (APC)	Gold OA	1	Kohler-JC	Kohler	Jillian Clare	Author, Reprint Author	1	UNIV-TORONTO	UNIV-TORONTO	UNIV-TORONTO	University	University - Rank 001-025	0	2145	0	1	0	0	0	0	0	0	0	0	0	0	1	0	0	0	0	0	0	1	1	1	Article
52060591	Aneurysm Global Epidemiology Study Public Health Measures Can Further Reduce Abdominal Aortic Aneurysm Mortality	CIRCULATION	7	2	Hybrid article	Hybrid	1	Sidloff-D	Sidloff	David	Author	1	UNIV-LEICESTER	UNIV-LEICESTER	UNIV-LEICESTER	University	University - Rank 101-200	0	4600	0	0	0	0	1	0	0	0	0	0	0	0	0	0	0	1	0	0	0	1	0	1	Article
52061702	Combustion By-Products and Their Health Effects-Combustion Engineering and Global Health in the 21st Century: Issues and Challenges	INTERNATIONAL JOURNAL OF TOXICOLOGY	10	9	Green OA article	Green OA	1	Lomnicki-S	Lomnicki	Slawo	Author	1	LOUISIANA-STATE-UNIV	LOUISIANA-STATE-UNIV	LOUISIANA-STATE-UNIV	University	University - Rank 501+	0	0	0	0	0	1	0	0	0	0	0	0	0	0	0	0	0	0	0	1	0	1	0	0	Review
52096797	Country clustering applied to the water and sanitation sector: A new tool with potential applications in research and policy	INTERNATIONAL JOURNAL OF HYGIENE AND ENVIRONMENTAL HEALTH	4	1	Green OA article	Green OA	1	Onda-K	Onda	Kyle	Author	1	UNIV-N-CAROLINA	UNIV-N-CAROLINA	UNIV-N-CAROLINA	University	University - Rank 051-100	0	0	0	0	0	1	0	0	0	0	0	0	0	0	0	0	1	0	0	0	0	1	0	0	Article
52097827	Evidence and AIDS activism: HIV scale-up and the contemporary politics of knowledge in global public health	GLOBAL PUBLIC HEALTH	1	2	Green OA article	Green OA	1	Colvin-CJ	Colvin	Christopher J.	Author, Reprint Author	1	UNIV-CAPE-TOWN	UNIV-CAPE-TOWN	UNIV-CAPE-TOWN	University	University - Rank 101-200	1	0	0	0	0	1	0	0	0	0	0	0	0	0	0	0	0	1	0	0	0	1	0	0	Article
52097837	HIV scale-up in Mozambique: Exceptionalism, normalisation and global health	GLOBAL PUBLIC HEALTH	1	2	Green OA article	Green OA	1	Hog-E	Hog	Erling	Author, Reprint Author	1	UNIV-LONDON-LONDON-SCH-ECON-&-POLIT-SCI	LONDON-SCH-ECON	LONDON-SCH-ECON	University	University - Rank 001-025	1	0	0	0	0	1	0	0	0	0	0	0	0	0	1	0	0	0	0	0	0	1	1	0	Article
52099424	Highlights From the FIPEd Global Education Report	AMERICAN JOURNAL OF PHARMACEUTICAL EDUCATION	11	10	Gold OA article (non-APC)	Gold OA	1	Anderson-C	Anderson	Claire	Author, Reprint Author	1	UNIV-NOTTINGHAM	UNIV-NOTTINGHAM	UNIV-NOTTINGHAM	University	University - Rank 101-200	0	0	0	0	1	0	0	0	0	0	0	0	0	0	0	0	0	1	0	0	0	1	0	0	Article
52100311	Health in global context; beyond the social determinants of health?	GLOBAL HEALTH ACTION	2	1	Gold OA article (APC)	Gold OA	1	Krumeich-A	Krumeich	Anja	Author, Reprint Author	1	MAASTRICHT-UNIV	MAASTRICHT-UNIV	MAASTRICHT-UNIV	University	University - Rank 051-100	0	1500	0	1	0	0	0	0	0	0	0	0	0	0	0	0	1	0	0	0	0	1	0	1	Review
52100339	Global health ethics: an introduction to prominent theories and relevant topics	GLOBAL HEALTH ACTION	5	3	Gold OA article (APC)	Gold OA	1	Stapleton-G	Stapleton	Greg	Author, Reprint Author	1	MAASTRICHT-UNIV	MAASTRICHT-UNIV	MAASTRICHT-UNIV	University	University - Rank 051-100	0	1500	0	1	0	0	0	0	0	0	0	0	0	0	0	0	1	0	0	0	0	1	0	1	Review
52100372	Global health in the 21st century	GLOBAL HEALTH ACTION	2	4	Gold OA article (APC)	Gold OA	1	Laaser-U	Laaser	Ulrich	Author, Reprint Author	1	UNIV-GENEVA	UNIV-GENEVA	UNIV-GENEVA	University	University - Rank 101-200	0	1500	0	1	0	0	0	0	0	0	0	0	0	0	0	0	0	1	0	0	0	1	0	1	Review
52100770	A new governance space for health	GLOBAL HEALTH ACTION	2	2	Gold OA article (APC)	Gold OA	1	Kickbusch-I	Kickbusch	Ilona	Author, Reprint Author	1	GRAD-INST-INT-&-DEV-STUDIES	GRAD-INST-INT-&-DEV-STUDIES	GRAD-INST-INT-&-DEV-STUDIES	Research institute	Research Institute	0	1500	0	1	0	0	0	0	0	0	0	0	1	0	0	0	0	0	0	0	0	0	0	1	Review
52100813	Global health in the European Union - a review from an agenda-setting perspective	GLOBAL HEALTH ACTION	3	3	Gold OA article (APC)	Gold OA	1	Aluttis-C	Aluttis	Christoph	Author, Reprint Author	1	MAASTRICHT-UNIV	MAASTRICHT-UNIV	MAASTRICHT-UNIV	University	University - Rank 051-100	0	1500	0	1	0	0	0	0	0	0	0	0	0	0	0	0	1	0	0	0	0	1	0	1	Review
52100836	The workforce for health in a globalized context - global shortages and international migration	GLOBAL HEALTH ACTION	3	4	Gold OA article (APC)	Gold OA	1	Aluttis-C	Aluttis	Christoph	Author, Reprint Author	1	MAASTRICHT-UNIV	MAASTRICHT-UNIV	MAASTRICHT-UNIV	University	University - Rank 051-100	0	1500	0	1	0	0	0	0	0	0	0	0	0	0	0	0	1	0	0	0	0	1	0	1	Review
52100837	The missing link - the role of primary care in global health	GLOBAL HEALTH ACTION	2	2	Gold OA article (APC)	Gold OA	1	Rao-M	Rao	Mala	Author	1	UNIV-E-LONDON	UNIV-E-LONDON	UNIV-E-LONDON	University	University - Rank 501+	0	1500	0	1	0	0	0	0	0	0	0	0	0	0	0	0	0	0	0	1	0	1	0	1	Review
52100838	The Millennium Development Goals: experiences, achievements and what's next	GLOBAL HEALTH ACTION	3	3	Gold OA article (APC)	Gold OA	1	Lomazzi-M	Lomazzi	Marta	Author, Reprint Author	1	UNIV-GENEVA	UNIV-GENEVA	UNIV-GENEVA	University	University - Rank 101-200	0	1500	0	1	0	0	0	0	0	0	0	0	0	0	0	0	0	1	0	0	0	1	0	1	Review
52114663	Body Mass Index and Mortality in Acutely Decompensated Heart Failure Across the World	JOURNAL OF THE AMERICAN COLLEGE OF CARDIOLOGY	20	17	Hybrid article	Hybrid	1	Shah-R	Shah	Ravi	Author	1	MASSACHUSETTS-GEN-HOSP	MASSACHUSETTS-GEN-HOSP	MASSACHUSETTS-GEN-HOSP	Hospital	Hospital	0	3000	0	0	0	0	1	0	0	0	1	0	0	0	0	0	0	0	0	0	0	0	0	1	Article
52118749	Worldwide Epidemiology of Atrial Fibrillation A Global Burden of Disease 2010 Study	CIRCULATION	15	11	Green OA article	Green OA	1	Chugh-SS	Chugh	Sumeet S.	Author, Reprint Author	1	CEDARS-SINAI-HEART-INST	CEDARS-SINAI-MED-CTR	CEDARS-SINAI-MED-CTR	Hospital	Hospital	0	0	0	0	0	1	0	0	0	0	1	0	0	0	0	0	0	0	0	0	0	0	0	0	Article
52131530	Cross-boundary Cancer Studies at the University of Tokyo: The Globalization of Healthcare	JAPANESE JOURNAL OF CLINICAL ONCOLOGY	1	1	Hybrid article	Hybrid	1	Shibuya-K	Shibuya	Kenji	Author, Reprint Author	1	UNIV-TOKYO	UNIV-TOKYO	UNIV-TOKYO	University	University - Rank 026-050	1	2800	0	0	0	0	1	0	0	0	0	0	0	0	0	1	0	0	0	0	0	1	1	1	Article
52136832	Associations between DSM-IV mental disorders and subsequent self-reported diagnosis of cancer	JOURNAL OF PSYCHOSOMATIC RESEARCH	20	1	Green OA article	Green OA	1	ONeill-S	O'Neill	Siobhan	Author, Reprint Author	1	UNIV-ULSTER	UNIV-ULSTER	UNIV-ULSTER	University	University - Rank 501+	0	0	0	0	0	1	0	0	0	0	0	0	0	0	0	0	0	0	0	1	0	1	0	0	Article
52144421	A global research agenda for family planning: results of an exercise for setting research priorities	BULLETIN OF THE WORLD HEALTH ORGANIZATION	5	2	Gold OA article (non-APC)	Gold OA	1	Ali-M	Ali	Moazzam	Author, Reprint Author	1	WHO	WHO	WHO	Non-profit	Non-profit	0	0	0	0	1	0	0	0	0	0	0	1	0	0	0	0	0	0	0	0	0	0	0	0	Article
52146242	A Single Measure of Cancer Burden Combining Incidence with Mortality Rates for Worldwide Application	ASIAN PACIFIC JOURNAL OF CANCER PREVENTION	4	4	Gold OA article (non-APC)	Gold OA	1	Kim-JL	Kim	Jeong Lim	Author	1	YONSEI-UNIV	YONSEI-UNIV	YONSEI-UNIV	University	University - Rank 201-500	0	0	0	0	1	0	0	0	0	0	0	0	0	0	0	0	0	0	1	0	0	1	0	0	Article
52148238	Resource Planning for Neglected Tropical Disease (NTD) Control Programs: Feasibility Study of the Tool for Integrated Planning and Costing (TIPAC)	PLOS NEGLECTED TROPICAL DISEASES	22	14	Gold OA article (APC)	Gold OA	1	Wouters-OJ	Wouters	Olivier J.	Author, Reprint Author	1	RTI-INT	RTI-INT	RTI-INT	Company	Company	0	2250	0	1	0	0	0	0	1	0	0	0	0	0	0	0	0	0	0	0	0	0	0	1	Article
52177755	The 'diverse, dynamic new world of global tobacco control'? An analysis of participation in the Conference of the Parties to the WHO Framework Convention on Tobacco Control	TOBACCO CONTROL	3	1	Green OA article	Green OA	1	Plotnikova-E	Plotnikova	Evgeniya	Author	1	UNIV-EDINBURGH	UNIV-EDINBURGH	UNIV-EDINBURGH	University	University - Rank 026-050	0	0	0	0	0	1	0	0	0	0	0	0	0	0	0	1	0	0	0	0	0	1	1	0	Article
52185626	Global Supply of Health Professionals	NEW ENGLAND JOURNAL OF MEDICINE	2	2	Delayed OA article	Delayed OA	1	Crisp-N	Crisp	Nigel	Author, Reprint Author	1	HOUSE-LORDS	HOUSE-LORDS	HOUSE-LORDS	Government	Government	0	0	1	0	0	0	0	0	0	1	0	0	0	0	0	0	0	0	0	0	0	0	0	0	Review
52189784	Improving Global Health Education: Development of a Global Health Competency Model	AMERICAN JOURNAL OF TROPICAL MEDICINE AND HYGIENE	15	16	Green OA article	Green OA	1	Ablah-E	Ablah	Elizabeth	Author, Reprint Author	1	UNIV-KANSAS	UNIV-KANSAS	UNIV-KANSAS	University	University - Rank 201-500	0	0	0	0	0	1	0	0	0	0	0	0	0	0	0	0	0	0	1	0	0	1	0	0	Article
52193022	The Role of Surgery in Global Health: Analysis of United States Inpatient Procedure Frequency by Condition Using the Global Burden of Disease 2010 Framework	PLOS ONE	5	6	Gold OA article (APC)	Gold OA	1	Rose-J	Rose	John	Author, Reprint Author	1	UNIV-CALIF-SAN-DIEGO	UNIV-CALIF-SAN-DIEGO	UNIV-CALIF-SAN-DIEGO	University	University - Rank 026-050	0	1495	0	1	0	0	0	0	0	0	0	0	0	0	0	1	0	0	0	0	0	1	1	1	Article
52201143	On Academics INCORPORATING GLOBAL HEALTH COMPETENCIES INTO THE PUBLIC HEALTH CURRICULUM	PUBLIC HEALTH REPORTS	5	2	Green OA article	Green OA	1	Winskell-K	Winskell	Kate	Author, Reprint Author	1	EMORY-UNIV	EMORY-UNIV	EMORY-UNIV	University	University - Rank 051-100	0	0	0	0	0	1	0	0	0	0	0	0	0	0	0	0	1	0	0	0	0	1	0	0	Article
52202148	Burden of migraine: international perspectives	NEUROLOGICAL SCIENCES	2	1	Green OA article	Green OA	1	Leonardi-M	Leonardi	M.	Author, Reprint Author	1	NEUROL-INST-C-BESTA-IRCCS-FDN	NEUROL-INST-C-BESTA-IRCCS-FDN	NEUROL-INST-C-BESTA-IRCCS-FDN	Research institute	Research Institute	0	0	0	0	0	1	0	0	0	0	0	0	1	0	0	0	0	0	0	0	0	0	0	0	Article
52206509	Incentives for Reporting Disease Outbreaks	PLOS ONE	3	7	Gold OA article (APC)	Gold OA	1	Laxminarayan-R	Laxminarayan	Ramanan	Author, Reprint Author	1	CTR-DIS-DYNAM-ECON-&-POLICY	CTR-DIS-DYNAM-ECON-&-POLICY	CTR-DIS-DYNAM-ECON-&-POLICY	Research institute	Research Institute	0	1495	0	1	0	0	0	0	0	0	0	0	1	0	0	0	0	0	0	0	0	0	0	1	Article
52212322	A systematic review of vitamin D status in populations worldwide	BRITISH JOURNAL OF NUTRITION	9	3	Green OA article	Green OA	1	Hilger-J	Hilger	Jennifer	Author	1	HEIDELBERG-UNIV	UNIV-HEIDELBERG	UNIV-HEIDELBERG-HOSP	Hospital	University - Rank 026-050	0	0	0	0	0	1	0	0	0	0	0	0	0	0	0	1	0	0	0	0	0	1	1	0	Review
52212456	Head and Neck Cancer: Global Burden and Regional Trends in India	ASIAN PACIFIC JOURNAL OF CANCER PREVENTION	2	2	Gold OA article (non-APC)	Gold OA	1	Mishra-A	Mishra	Anupam	Author, Reprint Author	1	KG-MED-UNIV-LUCKNOW	KG-MED-UNIV-LUCKNOW	KG-MED-UNIV-LUCKNOW	University	University: Unranked	0	0	0	0	1	0	0	0	0	0	0	0	0	0	0	0	0	0	0	0	1	1	0	0	Review
52230558	Designing an ethics curriculum to support global health experiences in surgery	JOURNAL OF SURGICAL RESEARCH	9	8	Toll access article	Toll access	1	Martin-BM	Martin	Benjamin M.	Author	1	EMORY-UNIV	EMORY-UNIV	EMORY-UNIV	University	University - Rank 051-100	0	0	0	0	0	0	0	1	0	0	0	0	0	0	0	0	1	0	0	0	0	1	0	0	Article
52241232	Health and Economic Benefits of Improved Injury Prevention and Trauma Care Worldwide	PLOS ONE	6	5	Gold OA article (APC)	Gold OA	1	Kotagal-M	Kotagal	Meera	Author, Reprint Author	1	HARVARD-UNIV	HARVARD-UNIV	HARVARD-UNIV	University	University - Rank 001-025	0	1495	0	1	0	0	0	0	0	0	0	0	0	0	1	0	0	0	0	0	0	1	1	1	Article
52242111	New GOLD classification: longitudinal data on group assignment	RESPIRATORY RESEARCH	22	25	Gold OA article (APC)	Gold OA	1	Casanova-C	Casanova	Ciro	Author, Reprint Author	1	HOSP-UNIV-NTRA-SRA-CANDELARIA	HOSP-UNIV-NTRA-SRA-CANDELARIA	HOSP-UNIV-NTRA-SRA-CANDELARIA	Hospital	Hospital	0	2525	0	1	0	0	0	0	0	0	1	0	0	0	0	0	0	0	0	0	0	0	0	1	Article
52242724	Postpartum haemorrhage management, risks, and maternal outcomes: findings from the World Health Organization Multicountry Survey on Maternal and Newborn Health	BJOG-AN INTERNATIONAL JOURNAL OF OBSTETRICS AND GYNAECOLOGY	6	3	Hybrid article	Hybrid	1	Sheldon-WR	Sheldon	W. R.	Author, Reprint Author	1	GYNU-HLTH-PROJECTS	GYNU-HLTH-PROJECTS	GYNU-HLTH-PROJECTS	Company	Company	0	3000	0	0	0	0	1	0	1	0	0	0	0	0	0	0	0	0	0	0	0	0	0	1	Article
52249587	Mood and anxiety disorders across the adult lifespan: a European perspective	PSYCHOLOGICAL MEDICINE	16	14	Green OA article	Green OA	1	McDowell-RD	McDowell	R. D.	Author, Reprint Author	1	UNIV-ULSTER	UNIV-ULSTER	UNIV-ULSTER	University	University - Rank 501+	0	0	0	0	0	1	0	0	0	0	0	0	0	0	0	0	0	0	0	1	0	1	0	0	Article
52249662	Sugar consumption and global prevalence of obesity and hypertension: an ecological analysis	PUBLIC HEALTH NUTRITION	6	3	Toll access article	Toll access	1	Siervo-M	Siervo	Mario	Author, Reprint Author	1	NEWCASTLE-UNIV	NEWCASTLE-UNIV	NEWCASTLE-UNIV	University	University - Rank 201-500	0	0	0	0	0	0	0	1	0	0	0	0	0	0	0	0	0	0	1	0	0	1	0	0	Article
52251458	Is universal health coverage the practical expression of the right to health care?	BMC INTERNATIONAL HEALTH AND HUMAN RIGHTS	8	8	Gold OA article (APC)	Gold OA	1	Ooms-G	Ooms	Gorik	Author, Reprint Author	1	INST-TROP-MED	INST-TROP-MED	INST-TROP-MED	Research institute	Research Institute	0	2145	0	1	0	0	0	0	0	0	0	0	1	0	0	0	0	0	0	0	0	0	0	1	Article
52251470	The emergence of a global right to health norm - the unresolved case of universal access to quality emergency obstetric care	BMC INTERNATIONAL HEALTH AND HUMAN RIGHTS	2	2	Gold OA article (APC)	Gold OA	1	Hammonds-R	Hammonds	Rachel	Author, Reprint Author	1	INST-TROP-MED	INST-TROP-MED	INST-TROP-MED	Research institute	Research Institute	0	2145	0	1	0	0	0	0	0	0	0	0	1	0	0	0	0	0	0	0	0	0	0	1	Article
52264590	Global estimates of diabetes prevalence for 2013 and projections for 2035	DIABETES RESEARCH AND CLINICAL PRACTICE	6	4	Green OA article	Green OA	1	Guariguata-L	Guariguata	L.	Author, Reprint Author	1	INT-DIABET-FEDERAT	INT-DIABET-FEDERAT	INT-DIABET-FEDERAT	Non-profit	Non-profit	0	0	0	0	0	1	0	0	0	0	0	1	0	0	0	0	0	0	0	0	0	0	0	0	Article
52264591	Global estimates of undiagnosed diabetes in adults	DIABETES RESEARCH AND CLINICAL PRACTICE	4	2	Green OA article	Green OA	1	Beagley-J	Beagley	Jessica	Author, Reprint Author	1	INT-DIABET-FEDERAT	INT-DIABET-FEDERAT	INT-DIABET-FEDERAT	Non-profit	Non-profit	0	0	0	0	0	1	0	0	0	0	0	1	0	0	0	0	0	0	0	0	0	0	0	0	Article
52264592	Diabetes in the young - a global view and worldwide estimates of numbers of children with type 1 diabetes	DIABETES RESEARCH AND CLINICAL PRACTICE	6	8	Green OA article	Green OA	1	Patterson-C	Patterson	Chris	Author	1	QUEENS-UNIV-BELFAST	QUEENS-UNIV-BELFAST	QUEENS-UNIV-BELFAST	University	University - Rank 201-500	0	0	0	0	0	1	0	0	0	0	0	0	0	0	0	0	0	0	1	0	0	1	0	0	Article
52264593	Global estimates of the prevalence of hyperglycaemia in pregnancy	DIABETES RESEARCH AND CLINICAL PRACTICE	5	3	Green OA article	Green OA	1	Guariguata-L	Guariguata	L.	Author, Reprint Author	1	INT-DIABET-FEDERAT	INT-DIABET-FEDERAT	INT-DIABET-FEDERAT	Non-profit	Non-profit	0	0	0	0	0	1	0	0	0	0	0	1	0	0	0	0	0	0	0	0	0	0	0	0	Article
52272227	Global Burden of Disease, Injury and Risk Factor Study 2010: Its Policy Implications for China	BIOMEDICAL AND ENVIRONMENTAL SCIENCES	6	3	Hybrid article	Hybrid	1	Yu-SC	Yu Shi Cheng		Author	1	CHINESE-CTR-DIS-CONTROL-&-PREVENT-CHINA-CDC	CHINA-CDC	CHINA-CDC	Government	Government	0	3000	0	0	0	0	1	0	0	1	0	0	0	0	0	0	0	0	0	0	0	0	0	1	Article
52272343	Medical student electives and learning outcomes for global health: A commentary on behalf of the UK Medical Schools Elective Council	MEDICAL TEACHER	3	3	Hybrid article	Hybrid	1	Hastings-A	Hastings	Adrian	Author	1	UNIV-LEICESTER	UNIV-LEICESTER	UNIV-LEICESTER	University	University - Rank 101-200	0	2950	0	0	0	0	1	0	0	0	0	0	0	0	0	0	0	1	0	0	0	1	0	1	Article
52285042	Strengthening of Oral Health Systems: Oral Health through Primary Health Care	MEDICAL PRINCIPLES AND PRACTICE	1	1	Gold OA article (non-APC)	Gold OA	1	Petersen-PE	Petersen	Poul Erik	Author, Reprint Author	1	WHO	WHO	WHO	Non-profit	Non-profit	1	0	0	0	1	0	0	0	0	0	0	1	0	0	0	0	0	0	0	0	0	0	0	0	Article
52285045	World Health Organization Approaches for Surveys of Health Behaviour among Schoolchildren and for Health-Promoting Schools	MEDICAL PRINCIPLES AND PRACTICE	1	1	Gold OA article (non-APC)	Gold OA	1	Honkala-S	Honkala	Sisko	Author, Reprint Author	1	KUWAIT-UNIV	KUWAIT-UNIV	KUWAIT-UNIV	University	University - Rank 501+	1	0	0	0	1	0	0	0	0	0	0	0	0	0	0	0	0	0	0	1	0	1	0	0	Article
52292895	Critical Anthropology of Global Health "Takes a Stand"Statement: A Critical Medical Anthropological Approach to the U.S.'s Affordable Care Act	MEDICAL ANTHROPOLOGY QUARTERLY	4	4	Toll access article	Toll access	1	Horton-S	Horton	Sarah	Author, Reprint Author	1	UNIV-COLORADO	UNIV-COLORADO-DENVER	UNIV-COLORADO-DENVER	University	University: Unranked	0	0	0	0	0	0	0	1	0	0	0	0	0	0	0	0	0	0	0	0	1	1	0	0	Article
52296274	Update on Vaccine-Derived Polioviruses - Worldwide, July 2012-December 2013	MMWR-MORBIDITY AND MORTALITY WEEKLY REPORT	4	3	Gold OA article (non-APC)	Gold OA	1	Diop-OM	Diop	Ousmane M.	Author	1	WHO	WHO	WHO	Non-profit	Non-profit	0	0	0	0	1	0	0	0	0	0	0	1	0	0	0	0	0	0	0	0	0	0	0	0	Article
52300690	Violence as a public health problem: An ecological study of 169 countries	SOCIAL SCIENCE & MEDICINE	3	2	Green OA article	Green OA	1	Wolf-A	Wolf	Achim	Author	1	UNIV-OXFORD	UNIV-OXFORD	UNIV-OXFORD	University	University - Rank 001-025	0	0	0	0	0	1	0	0	0	0	0	0	0	0	1	0	0	0	0	0	0	1	1	0	Article
52329927	CDC Grand Rounds: Global Tobacco Control	MMWR-MORBIDITY AND MORTALITY WEEKLY REPORT	7	4	Gold OA article (non-APC)	Gold OA	1	Asma-S	Asma	Samira	Author	1	CDC	CDC	CDC	Government	Government	0	0	0	0	1	0	0	0	0	1	0	0	0	0	0	0	0	0	0	0	0	0	0	0	Article
52360950	Global pharmacogenomics: Where is the research taking us?	GLOBAL PUBLIC HEALTH	2	1	Green OA article	Green OA	1	Olivier-C	Olivier	Catherine	Author, Reprint Author	1	UNIV-MONTREAL	UNIV-MONTREAL	UNIV-MONTREAL	University	University - Rank 101-200	0	0	0	0	0	1	0	0	0	0	0	0	0	0	0	0	0	1	0	0	0	1	0	0	Article
52360952	Maternal and child mortality indicators across 187 countries of the world: Converging or diverging	GLOBAL PUBLIC HEALTH	2	2	Toll access article	Toll access	1	Goli-S	Goli	Srinivas	Author, Reprint Author	1	GIRI-INST-DEV-STUDIES	GIRI-INST-DEV-STUDIES	GIRI-INST-DEV-STUDIES	Research institute	Research Institute	0	0	0	0	0	0	0	1	0	0	0	0	1	0	0	0	0	0	0	0	0	0	0	0	Article
52363926	Development of a Global Health Curriculum for Family Medicine Based on ACGME Competencies	TEACHING AND LEARNING IN MEDICINE	2	1	Toll access article	Toll access	1	Zink-T	Zink	Therese	Author, Reprint Author	1	UNIV-MINNESOTA	UNIV-MINNESOTA	UNIV-MINNESOTA	University	University - Rank 051-100	0	0	0	0	0	0	0	1	0	0	0	0	0	0	0	0	1	0	0	0	0	1	0	0	Article
52370153	Examining self-rated health of young Central and Eastern Europeans in the context of other world regions	EUROPEAN JOURNAL OF PUBLIC HEALTH	4	2	Hybrid article	Hybrid	1	Witvliet-MI	Witvliet	Margot I.	Author, Reprint Author	1	UNIV-AMSTERDAM	UNIV-AMSTERDAM	UNIV-AMSTERDAM	University	University - Rank 051-100	0	2400	0	0	0	0	1	0	0	0	0	0	0	0	0	0	1	0	0	0	0	1	0	1	Article
52370165	Attention to Local Health Burden and the Global Disparity of Health Research	PLOS ONE	3	6	Gold OA article (APC)	Gold OA	1	Evans-JA	Evans	James A.	Author, Reprint Author	1	UNIV-CHICAGO	UNIV-CHICAGO	UNIV-CHICAGO	University	University - Rank 001-025	0	1495	0	1	0	0	0	0	0	0	0	0	0	0	1	0	0	0	0	0	0	1	1	1	Article
52372021	Advancing social and economic development by investing in women's and children's health: a new Global Investment Framework	LANCET	28	17	Toll access article	Toll access	1	Stenberg-K	Stenberg	Karin	Author, Reprint Author	1	WORLD-HLTH-ORG	WHO	WHO	Non-profit	Non-profit	0	0	0	0	0	0	0	1	0	0	0	1	0	0	0	0	0	0	0	0	0	0	0	0	Article
52375782	The global epidemiology and burden of psychostimulant dependence: Findings from the Global Burden of Disease Study 2010	DRUG AND ALCOHOL DEPENDENCE	9	9	Toll access article	Toll access	1	Degenhardt-L	Degenhardt	Louisa	Author, Reprint Author	1	UNIV-NEW-S-WALES	UNIV-NEW-S-WALES	UNIV-NEW-S-WALES	University	University - Rank 051-100	0	0	0	0	0	0	0	1	0	0	0	0	0	0	0	0	1	0	0	0	0	1	0	0	Article
52380148	Influenza Forecasting in Human Populations: A Scoping Review	PLOS ONE	5	4	Gold OA article (APC)	Gold OA	1	Chretien-JP	Chretien	Jean-Paul	Author, Reprint Author	1	ARMED-FORCES-HLTH-SURVEILLANCE-CTR	ARMED-FORCES-HLTH-SURVEILLANCE-CTR	ARMED-FORCES-HLTH-SURVEILLANCE-CTR	Government	Government	0	1495	0	1	0	0	0	0	0	1	0	0	0	0	0	0	0	0	0	0	0	0	0	1	Review
52395033	Variations in Cause and Management of Atrial Fibrillation in a Prospective Registry of 15 400 Emergency Department Patients in 46 Countries The RE-LY Atrial Fibrillation Registry	CIRCULATION	22	17	Hybrid article	Hybrid	1	Oldgren-J	Oldgren	Jonas	Author, Reprint Author	1	UPPSALA-UNIV	UPPSALA-UNIV	UPPSALA-UNIV	University	University - Rank 051-100	0	4600	0	0	0	0	1	0	0	0	0	0	0	0	0	0	1	0	0	0	0	1	0	1	Article
52405687	The Correlation between Global Health Experiences in Low-Income Countries on Choice of Primary Care Residencies for Graduates of an Urban US Medical School	JOURNAL OF URBAN HEALTH-BULLETIN OF THE NEW YORK ACADEMY OF MEDICINE	3	2	Green OA article	Green OA	1	Bruno-DM	Bruno	Denise Marie	Author, Reprint Author	1	SUNY-DOWNSTATE-MED-CTR	SUNY-DOWNSTATE-MED-CTR	SUNY-DOWNSTATE-MED-CTR	Hospital	Hospital	0	0	0	0	0	1	0	0	0	0	1	0	0	0	0	0	0	0	0	0	0	0	0	0	Article
52412820	Breast cancer: trends in international incidence in men and women	BRITISH JOURNAL OF CANCER	4	3	Green OA article	Green OA	1	Kreiter-E	Kreiter	E.	Author	1	UNIV-ALBERTA	UNIV-ALBERTA	UNIV-ALBERTA	University	University - Rank 101-200	0	0	0	0	0	1	0	0	0	0	0	0	0	0	0	0	0	1	0	0	0	1	0	0	Article
52427240	Global numbers of infection and disease burden of soil transmitted helminth infections in 2010	PARASITES & VECTORS	4	3	Gold OA article (APC)	Gold OA	1	Pullan-RL	Pullan	Rachel L.	Author, Reprint Author	1	LONDON-SCH-HYG-&-TROP-MED	UCL	UCL	University	University - Rank 001-025	0	2145	0	1	0	0	0	0	0	0	0	0	0	0	1	0	0	0	0	0	0	1	1	1	Article
52427269	Regional variation in the allocation of development assistance for health	GLOBALIZATION AND HEALTH	7	2	Gold OA article (APC)	Gold OA	1	Hanlon-M	Hanlon	Michael	Author, Reprint Author	1	UNIV-WASHINGTON	UNIV-WASHINGTON	UNIV-WASHINGTON	University	University - Rank 026-050	0	2145	0	1	0	0	0	0	0	0	0	0	0	0	0	1	0	0	0	0	0	1	1	1	Article
52430397	Perceptions of a short-term medical programme in the Dominican Republic: Voices of care recipients	GLOBAL PUBLIC HEALTH	4	4	Green OA article	Green OA	1	DeCamp-M	DeCamp	Matthew	Author, Reprint Author	1	JOHNS-HOPKINS-UNIV	JOHNS-HOPKINS-UNIV	JOHNS-HOPKINS-UNIV	University	University - Rank 001-025	0	0	0	0	0	1	0	0	0	0	0	0	0	0	1	0	0	0	0	0	0	1	1	0	Article
52434793	Global collaborative networks on meta-analyses of randomized trials published in high impact factor medical journals: a social network analysis	BMC MEDICINE	5	6	Gold OA article (APC)	Gold OA	1	CatalaLopez-F	Catala-Lopez	Ferran	Author, Reprint Author	1	SPANISH-MED-&-HEALTHCARE-PROD-AGCY-AEMPS	SPANISH-MED-&-HEALTHCARE-PROD-AGCY-AEMPS	SPANISH-MED-&-HEALTHCARE-PROD-AGCY-AEMPS	Government	Government	0	2785	0	1	0	0	0	0	0	1	0	0	0	0	0	0	0	0	0	0	0	0	0	1	Article
52440248	Notification of animal and human diseases: the global legal basis	REVUE SCIENTIFIQUE ET TECHNIQUE DE L OFFICE INTERNATIONAL DES EPIZOOTIES	4	1	Toll access article	Toll access	1	Vallat-B	Vallat	B.	Author, Reprint Author	1	WORLD-ORG-ANIM-HLTH-OIE	WORLD-ORG-ANIM-HLTH	WORLD-ORG-ANIM-HLTH	Non-profit	Non-profit	0	0	0	0	0	0	0	1	0	0	0	1	0	0	0	0	0	0	0	0	0	0	0	0	Article
52448904	The Politics and Anti-Politics of the Global Fund Experiment: Understanding Partnership and Bureaucratic Expansion in Uganda	MEDICAL ANTHROPOLOGY	2	2	Toll access article	Toll access	1	Taylor-EM	Taylor	E. Michelle	Author, Reprint Author	1	UNIV-EDINBURGH	UNIV-EDINBURGH	UNIV-EDINBURGH	University	University - Rank 026-050	0	0	0	0	0	0	0	1	0	0	0	0	0	0	0	1	0	0	0	0	0	1	1	0	Article
52448905	De-Politicizing Parasites: Reflections on Attempts to Control the Control of Neglected Tropical Diseases	MEDICAL ANTHROPOLOGY	2	2	Green OA article	Green OA	1	Parker-M	Parker	Melissa	Author, Reprint Author	1	LONDON-SCH-HYG-&-TROP-MED	UCL	UCL	University	University - Rank 001-025	0	0	0	0	0	1	0	0	0	0	0	0	0	0	1	0	0	0	0	0	0	1	1	0	Article
52466596	Vaccine preventable diseases: Time to re-examine global surveillance data?	VACCINE	3	2	Green OA article	Green OA	1	MacNeil-A	MacNeil	Adam	Author, Reprint Author	1	CTR-DIS-CONTROL-&-PREVENT	CDC	CDC	Government	Government	0	0	0	0	0	1	0	0	0	1	0	0	0	0	0	0	0	0	0	0	0	0	0	0	Article
52475398	Global health impacts of policies: lessons from the UK	GLOBALIZATION AND HEALTH	4	4	Gold OA article (APC)	Gold OA	1	Mwatsama-MK	Mwatsama	Modi K.	Author	1	UK-HLTH-FORUM	UK-HLTH-FORUM	UK-HLTH-FORUM	Non-profit	Non-profit	0	2145	0	1	0	0	0	0	0	0	0	1	0	0	0	0	0	0	0	0	0	0	0	1	Article
52475407	Implementing Global Fund programs: a survey of opinions and experiences of the Principal Recipients across 69 countries	GLOBALIZATION AND HEALTH	3	2	Gold OA article (APC)	Gold OA	1	Wafula-F	Wafula	Francis	Author, Reprint Author	1	AIDSPAN	AIDSPAN	AIDSPAN	Non-profit	Non-profit	0	2145	0	1	0	0	0	0	0	0	0	1	0	0	0	0	0	0	0	0	0	0	0	1	Article
52475413	mHealth and global mental health: still waiting for the mH(2) wedding?	GLOBALIZATION AND HEALTH	3	3	Gold OA article (APC)	Gold OA	1	Farrington-C	Farrington	Conor	Author, Reprint Author	1	UNIV-CAMBRIDGE	UNIV-CAMBRIDGE	UNIV-CAMBRIDGE	University	University - Rank 001-025	0	2145	0	1	0	0	0	0	0	0	0	0	0	0	1	0	0	0	0	0	0	1	1	1	Article
52475427	Economic impacts of health shocks on households in low and middle income countries: a review of the literature	GLOBALIZATION AND HEALTH	2	2	Gold OA article (APC)	Gold OA	1	Alam-K	Alam	Khurshid	Author, Reprint Author	1	MONASH-UNIV	MONASH-UNIV	MONASH-UNIV	University	University - Rank 051-100	0	2145	0	1	0	0	0	0	0	0	0	0	0	0	0	0	1	0	0	0	0	1	0	1	Review
52475430	Noncommunicable diseases among urban refugees and asylum-seekers in developing countries: a neglected health care need	GLOBALIZATION AND HEALTH	2	3	Gold OA article (APC)	Gold OA	1	Amara-AH	Amara	Ahmed Hassan	Author, Reprint Author	1	CHARITE	CHARITE	CHARITE	Hospital	Hospital	0	2145	0	1	0	0	0	0	0	0	1	0	0	0	0	0	0	0	0	0	0	0	0	1	Review
52475436	Italy's contribution to global health: the need for a paradigm shift	GLOBALIZATION AND HEALTH	4	3	Gold OA article (APC)	Gold OA	1	Missoni-E	Missoni	Eduardo	Author, Reprint Author	1	UNIV-BOCCONI	UNIV-BOCCONI	UNIV-BOCCONI	University	University: Unranked	0	2145	0	1	0	0	0	0	0	0	0	0	0	0	0	0	0	0	0	0	1	1	0	1	Article
52477291	Surviving polio in a post-polio world	SOCIAL SCIENCE & MEDICINE	3	3	Hybrid article	Hybrid	1	Groce-NE	Groce	Nora Ellen	Author, Reprint Author	1	UCL	UCL	UCL	University	University - Rank 001-025	0	3200	0	0	0	0	1	0	0	0	0	0	0	0	1	0	0	0	0	0	0	1	1	1	Article
52488291	Adult haemophagocytic syndrome	LANCET	5	4	Toll access article	Toll access	1	RamosCasals-M	Ramos-Casals	Manuel	Author	1	UNIV-BARCELONA	UNIV-BARCELONA	UNIV-BARCELONA	University	University - Rank 201-500	0	0	0	0	0	0	0	1	0	0	0	0	0	0	0	0	0	0	1	0	0	1	0	0	Article
52489155	Indigenous health and environmental risk factors: an Australian problem with global analogues?	GLOBAL HEALTH ACTION	2	2	Gold OA article (APC)	Gold OA	1	Knibbs-LD	Knibbs	Luke D.	Author, Reprint Author	1	UNIV-QUEENSLAND	UNIV-QUEENSLAND	UNIV-QUEENSLAND	University	University - Rank 051-100	0	1500	0	1	0	0	0	0	0	0	0	0	0	0	0	0	1	0	0	0	0	1	0	1	Article
52489945	The global burden of low back pain: estimates from the Global Burden of Disease 2010 study	ANNALS OF THE RHEUMATIC DISEASES	13	13	Toll access article	Toll access	1	Hoy-D	Hoy	Damian	Author, Reprint Author	1	UNIV-QUEENSLAND	UNIV-QUEENSLAND	UNIV-QUEENSLAND	University	University - Rank 051-100	0	0	0	0	0	0	0	1	0	0	0	0	0	0	0	0	1	0	0	0	0	1	0	0	Article
52489946	The global burden of occupationally related low back pain: estimates from the Global Burden of Disease 2010 study	ANNALS OF THE RHEUMATIC DISEASES	8	4	Toll access article	Toll access	1	Driscoll-T	Driscoll	T.	Author, Reprint Author	1	UNIV-SYDNEY	UNIV-SYDNEY	UNIV-SYDNEY	University	University - Rank 051-100	0	0	0	0	0	0	0	1	0	0	0	0	0	0	0	0	1	0	0	0	0	1	0	0	Article
52489947	The global burden of musculoskeletal conditions for 2010: an overview of methods	ANNALS OF THE RHEUMATIC DISEASES	18	13	Toll access article	Toll access	1	Hoy-DG	Hoy	Damian G.	Author, Reprint Author	1	UNIV-QUEENSLAND	UNIV-QUEENSLAND	UNIV-QUEENSLAND	University	University - Rank 051-100	0	0	0	0	0	0	0	1	0	0	0	0	0	0	0	0	1	0	0	0	0	1	0	0	Article
52491085	Temporal Trends in Ischemic Heart Disease Mortality in 21 World Regions, 1980 to 2010 The Global Burden of Disease 2010 Study	CIRCULATION	7	6	Green OA article	Green OA	1	Moran-AE	Moran	Andrew E.	Author, Reprint Author	1	COLUMBIA-UNIV	COLUMBIA-UNIV	COLUMBIA-UNIV	University	University - Rank 001-025	0	0	0	0	0	1	0	0	0	0	0	0	0	0	1	0	0	0	0	0	0	1	1	0	Article
52491086	The Global Burden of Ischemic Heart Disease in 1990 and 2010	CIRCULATION	8	6	Green OA article	Green OA	1	Moran-AE	Moran	Andrew E.	Author, Reprint Author	1	COLUMBIA-UNIV	COLUMBIA-UNIV	COLUMBIA-UNIV	University	University - Rank 001-025	0	0	0	0	0	1	0	0	0	0	0	0	0	0	1	0	0	0	0	0	0	1	1	0	Article
52495740	Hepatitis C, A Global Issue: Access to Care and New Therapeutic and Preventive Approaches in Resource-Constrained Areas	SEMINARS IN LIVER DISEASE	2	1	Toll access article	Toll access	1	Lemoine-M	Lemoine	Maud	Author	1	UNIV-LONDON-IMPERIAL-COLL-SCI-TECHNOL-&-MED	UNIV-LONDON-IMPERIAL-COLL-SCI-TECHNOL-&-MED	UNIV-LONDON-IMPERIAL-COLL-SCI-TECHNOL-&-MED	University	University - Rank 001-025	0	0	0	0	0	0	0	1	0	0	0	0	0	0	1	0	0	0	0	0	0	1	1	0	Review
52500483	Surveillance Systems to Track Progress Toward Global Polio Eradication - Worldwide, 2012-2013	MMWR-MORBIDITY AND MORTALITY WEEKLY REPORT	9	4	Gold OA article (non-APC)	Gold OA	1	Levitt-A	Levitt	Alexandra	Author	1	CDC	CDC	CDC	Government	Government	0	0	0	0	1	0	0	0	0	1	0	0	0	0	0	0	0	0	0	0	0	0	0	0	Article
52509106	Back to the future: what would the post-2015 global development goals look like if we replicated methods used to construct the Millennium Development Goals?	GLOBALIZATION AND HEALTH	4	1	Gold OA article (APC)	Gold OA	1	Brolan-CE	Brolan	Claire E.	Author, Reprint Author	1	UNIV-QUEENSLAND	UNIV-QUEENSLAND	UNIV-QUEENSLAND	University	University - Rank 051-100	0	2145	0	1	0	0	0	0	0	0	0	0	0	0	0	0	1	0	0	0	0	1	0	1	Article
52511435	Incidence of multidrug-resistant tuberculosis disease in children: systematic review and global estimates	LANCET	9	6	Green OA article	Green OA	1	Jenkins-HE	Jenkins	Helen E.	Author	1	BRIGHAM-&-WOMENS-HOSP	BRIGHAM-&-WOMENS-HOSP	BRIGHAM-&-WOMENS-HOSP	Hospital	Hospital	0	0	0	0	0	1	0	0	0	0	1	0	0	0	0	0	0	0	0	0	0	0	0	0	Review
52520661	Promoting medical students' reflection on competencies to advance a global health equities curriculum	BMC MEDICAL EDUCATION	9	6	Gold OA article (APC)	Gold OA	1	Mullan-PB	Mullan	Patricia B.	Author, Reprint Author	1	UNIV-MICHIGAN	UNIV-MICHIGAN	UNIV-MICHIGAN	University	University - Rank 001-025	0	2145	0	1	0	0	0	0	0	0	0	0	0	0	1	0	0	0	0	0	0	1	1	1	Article
52530658	Worldwide prevalence of non-partner sexual violence: a systematic review	LANCET	7	5	Green OA article	Green OA	1	Abrahams-N	Abrahams	Naeemah	Author, Reprint Author	1	SOUTH-AFRICAN-MED-RES-COUNCIL	SOUTH-AFRICAN-MED-RES-COUNCIL	SOUTH-AFRICAN-MED-RES-COUNCIL	Government	Government	0	0	0	0	0	1	0	0	0	1	0	0	0	0	0	0	0	0	0	0	0	0	0	0	Review
52535730	Women's education level, contraceptive use and maternal mortality estimates	PUBLIC HEALTH	5	3	Green OA article	Green OA	1	Koch-E	Koch	E.	Author, Reprint Author	1	MELISA-INST	MELISA-INST	MELISA-INST	Research institute	Research Institute	0	0	0	0	0	1	0	0	0	0	0	0	1	0	0	0	0	0	0	0	0	0	0	0	Article
52543726	Chronic Kidney Disease and the Aging Population World Kidney Day 2014	TRANSPLANTATION	2	2	Green OA article	Green OA	1	Tonelli-M	Tonelli	Marcello	Author, Reprint Author	1	UNIV-ALBERTA	UNIV-ALBERTA	UNIV-ALBERTA	University	University - Rank 101-200	0	0	0	0	0	1	0	0	0	0	0	0	0	0	0	0	0	1	0	0	0	1	0	0	Article
52544207	A systematic analysis of global anemia burden from 1990 to 2010	BLOOD	14	12	Green OA article	Green OA	1	Kassebaum-NJ	Kassebaum	Nicholas J.	Author, Reprint Author	1	UNIV-WASHINGTON	UNIV-WASHINGTON	UNIV-WASHINGTON	University	University - Rank 026-050	0	0	0	0	0	1	0	0	0	0	0	0	0	0	0	1	0	0	0	0	0	1	1	0	Article
52546355	FADB: a food additive molecular database for in silico screening in food toxicology	FOOD ADDITIVES AND CONTAMINANTS PART A-CHEMISTRY ANALYSIS CONTROL EXPOSURE & RISK ASSESSMENT	3	2	Toll access article	Toll access	1	Ginex-T	Ginex	Tiziana	Author	1	UNIV-PARMA	UNIV-PARMA	UNIV-PARMA	University	University - Rank 501+	0	0	0	0	0	0	0	1	0	0	0	0	0	0	0	0	0	0	0	1	0	1	0	0	Article
52570376	A worldwide trend of increasing primary adenocarcinoma of the lung	SURGERY TODAY	2	1	Toll access article	Toll access	1	Nakamura-H	Nakamura	Haruhiko	Author, Reprint Author	1	ST-MARIANNA-UNIV	ST-MARIANNA-UNIV	ST-MARIANNA-UNIV	University	University: Unranked	0	0	0	0	0	0	0	1	0	0	0	0	0	0	0	0	0	0	0	0	1	1	0	0	Review
52572835	Enhancing medicine price transparency through price information mechanisms	GLOBALIZATION AND HEALTH	3	1	Gold OA article (APC)	Gold OA	1	Hinsch-M	Hinsch	Michael	Author, Reprint Author	1	WHO	WHO	WHO	Non-profit	Non-profit	0	2145	0	1	0	0	0	0	0	0	0	1	0	0	0	0	0	0	0	0	0	0	0	1	Article
52576287	The contribution of mass drug administration to global health: past, present and future	PHILOSOPHICAL TRANSACTIONS OF THE ROYAL SOCIETY B-BIOLOGICAL SCIENCES	4	3	Green OA article	Green OA	1	Webster-JP	Webster	Joanne P.	Author, Reprint Author	1	IMPERIAL-COLL-FAC-MED	IMPERIAL-COLL-SCI-&-MED	IMPERIAL-COLL-SCI-&-MED	University	University - Rank 001-025	0	0	0	0	0	1	0	0	0	0	0	0	0	0	1	0	0	0	0	0	0	1	1	0	Review
52576290	The ongoing challenge of latent tuberculosis	PHILOSOPHICAL TRANSACTIONS OF THE ROYAL SOCIETY B-BIOLOGICAL SCIENCES	4	4	Green OA article	Green OA	1	Esmail-H	Esmail	H.	Author, Reprint Author	1	UNIV-LONDON-IMPERIAL-COLL-SCI-TECHNOL-&-MED	UNIV-LONDON-IMPERIAL-COLL-SCI-TECHNOL-&-MED	UNIV-LONDON-IMPERIAL-COLL-SCI-TECHNOL-&-MED	University	University - Rank 001-025	0	0	0	0	0	1	0	0	0	0	0	0	0	0	1	0	0	0	0	0	0	1	1	0	Review
52581954	Enhancing global health and education in Malawi, Zambia, and the United States through an interprofessional global health exchange program	APPLIED NURSING RESEARCH	6	4	Toll access article	Toll access	1	Wilson-LL	Wilson	Lynda Law	Author, Reprint Author	1	UNIV-ALABAMA-BIRMINGHAM	UNIV-ALABAMA-BIRMINGHAM	UNIV-ALABAMA-BIRMINGHAM	University	University: Unranked	0	0	0	0	0	0	0	1	0	0	0	0	0	0	0	0	0	0	0	0	1	1	0	0	Article
52582478	The Global Burden of Skin Disease in 2010: An Analysis of the Prevalence and Impact of Skin Conditions	JOURNAL OF INVESTIGATIVE DERMATOLOGY	13	10	Hybrid article	Hybrid	1	Hay-RJ	Hay	Roderick J.	Author, Reprint Author	1	INT-FDN-DERMATOL	INT-FDN-DERMATOL	INT-FDN-DERMATOL	Non-profit	Non-profit	0	3200	0	0	0	0	1	0	0	0	0	1	0	0	0	0	0	0	0	0	0	0	0	1	Article
52583739	Why Do Americans Have Shorter Life Expectancy and Worse Health Than Do People in Other High-Income Countries?	Annual Review of Public Health	2	2	Green OA article	Green OA	1	Avendano-M	Avendano	Mauricio	Author, Reprint Author	1	UNIV-LONDON-LONDON-SCH-ECON-&-POLIT-SCI	LONDON-SCH-ECON	LONDON-SCH-ECON	University	University - Rank 001-025	0	0	0	0	0	1	0	0	0	0	0	0	0	0	1	0	0	0	0	0	0	1	1	0	Review
52583744	Community Health Workers in Low-, Middle-, and High-Income Countries: An Overview of Their History, Recent Evolution, and Current Effectiveness	Annual Review of Public Health	3	3	Toll access article	Toll access	1	Perry-HB	Perry	Henry B.	Author, Reprint Author	1	JOHNS-HOPKINS-BLOOMBERG-SCH-PUBL-HLTH	JOHNS-HOPKINS-UNIV	JOHNS-HOPKINS-UNIV	University	University - Rank 001-025	0	0	0	0	0	0	0	1	0	0	0	0	0	0	1	0	0	0	0	0	0	1	1	0	Review
52583746	Scale, Causes, and Implications of the Primary Care Nursing Shortage	Annual Review of Public Health	6	3	Toll access article	Toll access	1	MacLean-L	MacLean	Logan	Author, Reprint Author	1	UNIV-PENN	UNIV-PENN	UNIV-PENN	University	University - Rank 001-025	0	0	0	0	0	0	0	1	0	0	0	0	0	0	1	0	0	0	0	0	0	1	1	0	Review
52590247	The effect of illicit financial flows on time to reach the fourth Millennium Development Goal in Sub-Saharan Africa: a quantitative analysis	JOURNAL OF THE ROYAL SOCIETY OF MEDICINE	5	5	Green OA article	Green OA	1	OHare-B	O'Hare	Bernadette	Author, Reprint Author	1	UNIV-ST-ANDREWS	UNIV-ST-ANDREWS	UNIV-ST-ANDREWS	University	University - Rank 101-200	0	0	0	0	0	1	0	0	0	0	0	0	0	0	0	0	0	1	0	0	0	1	0	0	Article
52603296	Another international imaging society-to what end? The World Federation of Pediatric Imaging: one voice, a common message, a unified network	PEDIATRIC RADIOLOGY	3	3	Toll access article	Toll access	1	Dehaye-A	Dehaye	Amanda	Author	1	WORLD-FEDERAT-PEDIAT-IMAGING	WORLD-FEDERAT-PEDIAT-IMAGING	WORLD-FEDERAT-PEDIAT-IMAGING	Scientific association	Scientific association	0	0	0	0	0	0	0	1	0	0	0	0	0	1	0	0	0	0	0	0	0	0	0	0	Article
52603297	International pediatric radiology education: who should be trained, and how?	PEDIATRIC RADIOLOGY	2	2	Toll access article	Toll access	1	Bulas-D	Bulas	Dorothy	Author, Reprint Author	1	CHILDRENS-NATL-MED-CTR	CHILDRENS-NATL-MED-CTR	CHILDRENS-NATL-MED-CTR	Hospital	Hospital	0	0	0	0	0	0	0	1	0	0	1	0	0	0	0	0	0	0	0	0	0	0	0	0	Article
52603316	Partnering to solve the problem of tuberculosis	PEDIATRIC RADIOLOGY	2	2	Toll access article	Toll access	1	Laya-BF	Laya	Bernard F.	Author, Reprint Author	1	ST-LUKES-MED-CTR-GLOBAL-CITY	ST-LUKES-MED-CTR-GLOBAL-CITY	ST-LUKES-MED-CTR-GLOBAL-CITY	Hospital	Hospital	0	0	0	0	0	0	0	1	0	0	1	0	0	0	0	0	0	0	0	0	0	0	0	0	Article
52603317	World Federation of Pediatric Imaging envisions Web site as a tool to share and disseminate top-notch educational material to a global audience at a minimal cost	PEDIATRIC RADIOLOGY	2	3	Toll access article	Toll access	1	Prabhu-SP	Prabhu	Sanjay P.	Author, Reprint Author	1	BOSTON-CHILDRENS-HOSP	BOSTON-CHILDRENS-HOSP	BOSTON-CHILDRENS-HOSP	Hospital	Hospital	0	0	0	0	0	0	0	1	0	0	1	0	0	0	0	0	0	0	0	0	0	0	0	0	Article
52603324	A paediatric radiology text for resource-poor settings?	PEDIATRIC RADIOLOGY	2	1	Toll access article	Toll access	1	McHugh-K	McHugh	Kieran	Author, Reprint Author	1	GREAT-ORMOND-ST-HOSP-SICK-CHILDREN	GREAT-ORMOND-ST-HOSP-SICK-CHILDREN	GREAT-ORMOND-ST-HOSP-SICK-CHILDREN	Hospital	Hospital	0	0	0	0	0	0	0	1	0	0	1	0	0	0	0	0	0	0	0	0	0	0	0	0	Article
52606124	Global, regional, and national trends in haemoglobin concentration and prevalence of total and severe anaemia in children and pregnant and non-pregnant women for 1995-2011: a systematic analysis of population-representative data	LANCET GLOBAL HEALTH	9	8	Gold OA article (APC)	Gold OA	1	Stevens-GA	Stevens	Gretchen A.	Author	1	WHO	WHO	WHO	Non-profit	Non-profit	0	5000	0	1	0	0	0	0	0	0	0	1	0	0	0	0	0	0	0	0	0	0	0	1	Article
52606166	Domestic and donor financing for tuberculosis care and control in low-income and middle-income countries: an analysis of trends, 2002-11, and requirements to meet 2015 targets	LANCET GLOBAL HEALTH	4	1	Gold OA article (APC)	Gold OA	1	Floyd-K	Floyd	Katherine	Author, Reprint Author	1	WHO	WHO	WHO	Non-profit	Non-profit	0	5000	0	1	0	0	0	0	0	0	0	1	0	0	0	0	0	0	0	0	0	0	0	1	Article
52606366	Global and regional burden of first-ever ischaemic and haemorrhagic stroke during 1990-2010: findings from the Global Burden of Disease Study 2010	LANCET GLOBAL HEALTH	20	22	Gold OA article (APC)	Gold OA	1	Krishnamurthi-RV	Krishnamurthi	Rita V.	Author	1	AUCKLAND-UNIV-TECHNOL	AUCKLAND-TECH-UNIV	AUCKLAND-TECH-UNIV	University	University - Rank 501+	0	5000	0	1	0	0	0	0	0	0	0	0	0	0	0	0	0	0	0	1	0	1	0	1	Article
52606402	Causes of vision loss worldwide, 1990-2010: a systematic analysis	LANCET GLOBAL HEALTH	13	13	Gold OA article (APC)	Gold OA	1	Bourne-RRA	Bourne	Rupert R. A.	Author, Reprint Author	1	ANGLIA-RUSKIN-UNIV	ANGLIA-RUSKIN-UNIV	ANGLIA-RUSKIN-UNIV	University	University - Rank 201-500	0	5000	0	1	0	0	0	0	0	0	0	0	0	0	0	0	0	0	1	0	0	1	0	1	Article
52606460	Global migration and the changing distribution of sickle haemoglobin: a quantitative study of temporal trends between 1960 and 2000	LANCET GLOBAL HEALTH	6	9	Gold OA article (APC)	Gold OA	1	Piel-FB	Piel	Frederic B.	Author, Reprint Author	1	UNIV-OXFORD	UNIV-OXFORD	UNIV-OXFORD	University	University - Rank 001-025	0	5000	0	1	0	0	0	0	0	0	0	0	0	0	1	0	0	0	0	0	0	1	1	1	Article
52606463	Global prevalence of age-related macular degeneration and disease burden projection for 2020 and 2040: a systematic review and meta-analysis	LANCET GLOBAL HEALTH	7	7	Gold OA article (APC)	Gold OA	1	Wong-WL	Wong	Wan Ling	Author	1	SINGAPORE-NATL-EYE-CTR	SINGAPORE-NATL-EYE-CTR	SINGAPORE-NATL-EYE-CTR	Hospital	Hospital	0	5000	0	1	0	0	0	0	0	0	1	0	0	0	0	0	0	0	0	0	0	0	0	1	Article
52606597	Global causes of maternal death: a WHO systematic analysis	LANCET GLOBAL HEALTH	9	5	Gold OA article (APC)	Gold OA	1	Say-L	Say	Lale	Author, Reprint Author	1	WHO	WHO	WHO	Non-profit	Non-profit	0	5000	0	1	0	0	0	0	0	0	0	1	0	0	0	0	0	0	0	0	0	0	0	1	Article
52609108	Medicalization of global health 2: the medicalization of global mental health	GLOBAL HEALTH ACTION	1	2	Gold OA article (APC)	Gold OA	1	Clark-J	Clark	Jocalyn	Author, Reprint Author	1	ICDDR-B	INT-CTR-DIARRHOEAL-DIS-RES	INT-CTR-DIARRHOEAL-DIS-RES	Non-profit	Non-profit	1	1500	0	1	0	0	0	0	0	0	0	1	0	0	0	0	0	0	0	0	0	0	0	1	Article
52609291	Do medical students want to learn about global health?	GLOBAL HEALTH ACTION	7	6	Gold OA article (APC)	Gold OA	1	Gopfert-A	Goepfert	Anya	Author, Reprint Author	1	INT-FEDERAT-MED-STUDENTS-ASSOC	INT-FEDERAT-MED-STUDENTS-ASSOC	INT-FEDERAT-MED-STUDENTS-ASSOC	Scientific association	Scientific association	0	1500	0	1	0	0	0	0	0	0	0	0	0	1	0	0	0	0	0	0	0	0	0	1	Article
52612012	The Global Burden of Aortic Stenosis	PROGRESS IN CARDIOVASCULAR DISEASES	3	1	Green OA article	Green OA	1	Thaden-JJ	Thaden	Jeremy J.	Author	1	MAYO-CLIN	MAYO-CLIN	MAYO-CLIN	Hospital	Hospital	0	0	0	0	0	1	0	0	0	0	1	0	0	0	0	0	0	0	0	0	0	0	0	0	Review
52620911	2014 Global geographic analysis of mortality from ischaemic heart disease by country, age and income: Statistics from World Health Organisation and United Nations	INTERNATIONAL JOURNAL OF CARDIOLOGY	5	1	Green OA article	Green OA	1	Nowbar-AN	Nowbar	Alexandra N.	Author, Reprint Author	1	UNIV-LONDON-IMPERIAL-COLL-SCI-TECHNOL-&-MED	UNIV-LONDON-IMPERIAL-COLL-SCI-TECHNOL-&-MED	UNIV-LONDON-IMPERIAL-COLL-SCI-TECHNOL-&-MED	University	University - Rank 001-025	0	0	0	0	0	1	0	0	0	0	0	0	0	0	1	0	0	0	0	0	0	1	1	0	Article
52627547	Evolving Norms at the Intersection of Health and Trade	JOURNAL OF HEALTH POLITICS POLICY AND LAW	2	3	Green OA article	Green OA	1	Drope-J	Drope	Jeffrey	Author, Reprint Author	1	AMER-CANC-SOC	AMER-CANC-SOC	AMER-CANC-SOC	Scientific association	Scientific association	0	0	0	0	0	1	0	0	0	0	0	0	0	1	0	0	0	0	0	0	0	0	0	0	Article
52630947	Global Health Development Assistance Remained Steady In 2013 But Did Not Align With Recipients' Disease Burden	HEALTH AFFAIRS	8	1	Toll access article	Toll access	1	Dieleman-JL	Dieleman	Joseph L.	Author, Reprint Author	1	UNIV-WASHINGTON	UNIV-WASHINGTON	UNIV-WASHINGTON	University	University - Rank 026-050	1	0	0	0	0	0	0	1	0	0	0	0	0	0	0	1	0	0	0	0	0	1	1	0	Article
52631341	Barriers to mental health treatment: results from the WHO World Mental Health surveys	PSYCHOLOGICAL MEDICINE	31	33	Green OA article	Green OA	1	Andrade-LH	Andrade	L. H.	Author	1	UNIV-SAO-PAULO	UNIV-SAO-PAULO	UNIV-SAO-PAULO	University	University - Rank 201-500	0	0	0	0	0	1	0	0	0	0	0	0	0	0	0	0	0	0	1	0	0	1	0	0	Article
52635665	Global control of tuberculosis: from extensively drug-resistant to untreatable tuberculosis	LANCET RESPIRATORY MEDICINE	8	12	Toll access article	Toll access	1	Dheda-K	Dheda	Keertan	Author, Reprint Author	1	UNIV-CAPE-TOWN	UNIV-CAPE-TOWN	UNIV-CAPE-TOWN	University	University - Rank 101-200	0	0	0	0	0	0	0	1	0	0	0	0	0	0	0	0	0	1	0	0	0	1	0	0	Review
52635722	Assessment of the worldwide burden of critical illness: the Intensive Care Over Nations (ICON) audit	LANCET RESPIRATORY MEDICINE	12	11	Green OA article	Green OA	1	Vincent-JL	Vincent	Jean-Louis	Author, Reprint Author	1	UNIV-LIBRE-BRUSSELS	UNIV-LIBRE-BRUSSELS	UNIV-LIBRE-BRUSSELS	University	University - Rank 201-500	0	0	0	0	0	1	0	0	0	0	0	0	0	0	0	0	0	0	1	0	0	1	0	0	Article
52639594	Global polio perspective	NEUROLOGY	2	2	Green OA article	Green OA	1	Oberste-MS	Oberste	M. Steven	Author	1	CTR-DIS-CONTROL-&-PREVENT	CDC	CDC	Government	Government	0	0	0	0	0	1	0	0	0	1	0	0	0	0	0	0	0	0	0	0	0	0	0	0	Article
52640689	Challenges faced by multidisplinary new investigators on addressing grand challenges in global health	GLOBALIZATION AND HEALTH	4	12	Gold OA article (APC)	Gold OA	1	Logie-C	Logie	Carmen	Author	1	UNIV-TORONTO	UNIV-TORONTO	UNIV-TORONTO	University	University - Rank 001-025	0	2145	0	1	0	0	0	0	0	0	0	0	0	0	1	0	0	0	0	0	0	1	1	1	Article
52640700	The multiple meanings of global health governance: a call for conceptual clarity	GLOBALIZATION AND HEALTH	2	2	Gold OA article (APC)	Gold OA	1	Lee-K	Lee	Kelley	Author, Reprint Author	1	SIMON-FRASER-UNIV	SIMON-FRASER-UNIV	SIMON-FRASER-UNIV	University	University - Rank 201-500	0	2145	0	1	0	0	0	0	0	0	0	0	0	0	0	0	0	0	1	0	0	1	0	1	Article
52640858	Reporting of context and implementation in studies of global health interventions: a pilot study	IMPLEMENTATION SCIENCE	5	2	Gold OA article (APC)	Gold OA	1	Luoto-J	Luoto	Jill	Author, Reprint Author	1	RAND-CORP	RAND-CORP	RAND-CORP	Company	Company	0	2365	0	1	0	0	0	0	1	0	0	0	0	0	0	0	0	0	0	0	0	0	0	1	Article
52656183	Brucellosis: 'One Health' challenges and opportunities	REVUE SCIENTIFIQUE ET TECHNIQUE DE L OFFICE INTERNATIONAL DES EPIZOOTIES	3	4	Toll access article	Toll access	1	Plumb-GE	Plumb	G. E.	Author, Reprint Author	1	NATL-PK-SERV	NATL-PK-SERV	NATL-PK-SERV	Government	Government	0	0	0	0	0	0	0	1	0	1	0	0	0	0	0	0	0	0	0	0	0	0	0	0	Article
52662265	Progress Toward Polio Eradication - Worldwide, 2013-2014	MMWR-MORBIDITY AND MORTALITY WEEKLY REPORT	7	4	Gold OA article (non-APC)	Gold OA	1	Moturi-EK	Moturi	Edna K.	Author, Reprint Author	1	CDC	CDC	CDC	Government	Government	0	0	0	0	1	0	0	0	0	1	0	0	0	0	0	0	0	0	0	0	0	0	0	0	Article
52669651	Disability prevalence among adults: estimates for 54 countries and progress toward a global estimate	DISABILITY AND REHABILITATION	2	3	Green OA article	Green OA	1	Mitra-S	Mitra	Sophie	Author, Reprint Author	1	FORDHAM-UNIV	FORDHAM-UNIV	FORDHAM-UNIV	University	University: Unranked	0	0	0	0	0	1	0	0	0	0	0	0	0	0	0	0	0	0	0	0	1	1	0	0	Article
52684039	Using Risk Assessment as Part of a Systems Approach to the Control and Prevention of HPAIV H5N1	ECOHEALTH	3	2	Toll access article	Toll access	1	Costard-S	Costard	Solenne	Author, Reprint Author	1	UNIV-LONDON-ROYAL-VET-COLL	UNIV-LONDON-ROYAL-VET-COLL	UNIV-LONDON-ROYAL-VET-COLL	University	University - Rank 001-025	0	0	0	0	0	0	0	1	0	0	0	0	0	0	1	0	0	0	0	0	0	1	1	0	Review
52684221	A Toolkit to assess health needs for congenital disorders in low- and middle-income countries: an instrument for public health action	JOURNAL OF PUBLIC HEALTH	11	3	Green OA article	Green OA	1	Nacul-LC	Nacul	L. C.	Author	1	FDN-GENOM-&-POPULAT-HLTH	FDN-GENOM-&-POPULAT-HLTH	FDN-GENOM-&-POPULAT-HLTH	Non-profit	Non-profit	0	0	0	0	0	1	0	0	0	0	0	1	0	0	0	0	0	0	0	0	0	0	0	0	Article
52693965	Innovative strategies for closing the mental health treatment gap globally	CURRENT OPINION IN PSYCHIATRY	4	3	Toll access article	Toll access	1	Rebello-TJ	Rebello	Tahilia J.	Author	1	COLUMBIA-UNIV	COLUMBIA-UNIV	COLUMBIA-UNIV	University	University - Rank 001-025	0	0	0	0	0	0	0	1	0	0	0	0	0	0	1	0	0	0	0	0	0	1	1	0	Review
52694153	Prevention and control of hypertension: developing a global agenda	CURRENT OPINION IN CARDIOLOGY	2	2	Green OA article	Green OA	1	Campbell-NRC	Campbell	Norm R. C.	Author, Reprint Author	1	UNIV-CALGARY	UNIV-CALGARY	UNIV-CALGARY	University	University - Rank 101-200	0	0	0	0	0	1	0	0	0	0	0	0	0	0	0	0	0	1	0	0	0	1	0	0	Review
[truncated: 227 more rows]
