# Supplementary material for: Authorial and institutional stratification in open access publishing: the case of global health research
Source: PeerJ. 2018 Feb 19;6:e4269. doi: 10.7717/peerj.4269 (PMC5822836; doi:10.7717/peerj.4269)
Supplement: Supplemental Information 2 [file peerj-06-4269-s002.xlsx]

## Sheet: Data
id_art	titre	Revue	Nb_Auteur	Nb_Adresse	accesscat	largeraccesscat	authororder	Nom	Nom_Famille	Prenom	Role	addressorder	institution	cleanname	cleanname_univ_hosp	inst_type_general	inst_type	inst_type2	inst_type3	is_last	apc_paid	delayed	goldAPC	goldFree	green	hybrid	closed	company	govt	hospital	nonprofit	resinst	sciass	univ125	univ2650	univ51100	univ101200	univ201500	univ501plus	univunranked	univ	pay	univtop50	univnottop50	type
50372840	'BRICS without straw'? A systematic literature review of newly emerging economies' influence in global health	GLOBALIZATION AND HEALTH	4	3	Gold OA article (APC)	Gold OA	4	Tediosi-F	Tediosi	Fabrizio	Author	2	BOCCONI-UNIV	BOCCONI-UNIV	BOCCONI-UNIV	University	University: Unranked	University: Unranked	University: Unranked	1	2145	0	1	0	0	0	0	0	0	0	0	0	0	0	0	0	0	0	0	1	1	1	0	1	Review
46025198	'Sustainability' in global health	GLOBAL PUBLIC HEALTH	3	3	Toll access article	Toll access	3	McGahan-AM	McGahan	Anita M.	Author, Reprint Author	1	UNIV-TORONTO	UNIV-TORONTO	UNIV-TORONTO	University	University - Rank 001-025	University - Rank 001-025	University - Rank 001-025	1	0	0	0	0	0	0	1	0	0	0	0	0	0	1	0	0	0	0	0	0	1	0	1	0	Article
53574285	10th World IHEA and ECHE joint congress: Health Economics in the Age of Longevity	EXPERT REVIEW OF PHARMACOECONOMICS & OUTCOMES RESEARCH	4	4	Green OA article	Green OA	4	Anegawa-T	Anegawa	Tomofumi	Author	4	KEIO-UNIV	KEIO-UNIV	KEIO-UNIV	University	University - Rank 501+	University - Rank 501+	University - Rank 501+	1	0	0	0	0	1	0	0	0	0	0	0	0	0	0	0	0	0	0	1	0	1	0	0	1	Article
47157126	2010: The year in review, Part I	INTERNATIONAL JOURNAL OF TUBERCULOSIS AND LUNG DISEASE	3	3	Green OA article	Green OA	3	Dheda-K	Dheda	K.	Author	2	UNIV-CAPE-TOWN	UNIV-CAPE-TOWN	UNIV-CAPE-TOWN	University	University - Rank 101-200	University - Rank 101-200	University - Rank 101-200	1	0	0	0	0	1	0	0	0	0	0	0	0	0	0	0	0	1	0	0	0	1	0	0	1	Review
52620911	2014 Global geographic analysis of mortality from ischaemic heart disease by country, age and income: Statistics from World Health Organisation and United Nations	INTERNATIONAL JOURNAL OF CARDIOLOGY	5	1	Green OA article	Green OA	5	Francis-DP	Francis	Darrel P.	Author	1	UNIV-LONDON-IMPERIAL-COLL-SCI-TECHNOL-&-MED	UNIV-LONDON-IMPERIAL-COLL-SCI-TECHNOL-&-MED	UNIV-LONDON-IMPERIAL-COLL-SCI-TECHNOL-&-MED	University	University - Rank 001-025	University - Rank 001-025	University - Rank 001-025	1	0	0	0	0	1	0	0	0	0	0	0	0	0	1	0	0	0	0	0	0	1	0	1	0	Article
50760351	A Case for an International Health Elective Training Program During Residency: A Four-Points Call for Action	TEACHING AND LEARNING IN MEDICINE	2	1	Toll access article	Toll access	2	DelValle-J	Del Valle	John	Author	1	UNIV-MICHIGAN	UNIV-MICHIGAN	UNIV-MICHIGAN	University	University - Rank 001-025	University - Rank 001-025	University - Rank 001-025	1	0	0	0	0	0	0	1	0	0	0	0	0	0	1	0	0	0	0	0	0	1	0	1	0	Article
48879420	A Chronicle of Hope and Promise: The World As It Was, As It Is, and As It Can Be	JAIDS-JOURNAL OF ACQUIRED IMMUNE DEFICIENCY SYNDROMES	4	4	Green OA article	Green OA	4	Volberding-P	Volberding	Paul	Author	4	UNIV-CALIF-SAN-FRANCISCO	UCSF	UCSF	University	University - Rank 001-025	University - Rank 001-025	University - Rank 001-025	1	0	0	0	0	1	0	0	0	0	0	0	0	0	1	0	0	0	0	0	0	1	0	1	0	Article
45050865	A Framework Convention on Global Health: Social Justice Lite, or a Light on Social Justice?	JOURNAL OF LAW MEDICINE & ETHICS	2	1	Toll access article	Toll access	1	Burris-S	Burris	Scott	Author, Reprint Author	1	TEMPLE-UNIV	TEMPLE-UNIV	TEMPLE-UNIV	University	University - Rank 201-500	University - Rank 201-500	University - Rank 201-500	1	0	0	0	0	0	0	1	0	0	0	0	0	0	0	0	0	0	1	0	0	1	0	0	1	Article
49930697	A French-speaking speech-language pathology program in West Africa: Transfer of training between Minority and Majority World countries	INTERNATIONAL JOURNAL OF SPEECH-LANGUAGE PATHOLOGY	2	2	Green OA article	Green OA	2	Mijiyawa-M	Mijiyawa	Moustafa	Author	2	ECOLE-NATL-AUXILIAIRES-MED	ECOLE-NATL-AUXILIAIRES-MED	ECOLE-NATL-AUXILIAIRES-MED	University	University: Unranked	University: Unranked	University: Unranked	1	0	0	0	0	1	0	0	0	0	0	0	0	0	0	0	0	0	0	0	1	1	0	0	1	Article
47831076	A Global Coordinating Platform for Noncommunicable Diseases	JOURNAL OF HEALTH COMMUNICATION	2	2	Toll access article	Toll access	2	JaneLlopis-E	Jane-Llopis	Eva	Author	2	WORLD-ECON-FORUM	WORLD-ECON-FORUM	WORLD-ECON-FORUM	Non-profit	Non-profit	Non-profit	Non-profit	1	0	0	0	0	0	0	1	0	0	0	1	0	0	0	0	0	0	0	0	0	0	0	0	1	Article
47972563	A Global Perspective of Wound Care (c)	ADVANCES IN SKIN & WOUND CARE	5	7	Green OA article	Green OA	5	Ostrow-B	Ostrow	Brian	Author	1	UNIV-TORONTO	UNIV-TORONTO	UNIV-TORONTO	University	University - Rank 001-025	University - Rank 001-025	University - Rank 001-025	1	0	0	0	0	1	0	0	0	0	0	0	0	0	1	0	0	0	0	0	0	1	0	1	0	Article
46825291	A Global Perspective on Gastrointestinal Diseases	GASTROENTEROLOGY CLINICS OF NORTH AMERICA	3	3	Toll access article	Toll access	3	Ahmad-A	Ahmad	Asyia	Author, Reprint Author	1	DREXEL-UNIV	DREXEL-UNIV	DREXEL-UNIV	University	University - Rank 201-500	University - Rank 201-500	University - Rank 201-500	1	0	0	0	0	0	0	1	0	0	0	0	0	0	0	0	0	0	1	0	0	1	0	0	1	Article
48353025	A Global Perspective on Irritable Bowel Syndrome A Consensus Statement of the World Gastroenterology Organisation Summit Task Force on Irritable Bowel Syndrome	JOURNAL OF CLINICAL GASTROENTEROLOGY	24	1	Green OA article	Green OA	24	Tzeuton-C	Tzeuton	Christian	Author	1	CORK-UNIV-HOSP	UNIV-COLL-CORK	CORK-UNIV-HOSP	Hospital	University - Rank 201-500	University-Hospital	Hospital	1	0	0	0	0	1	0	0	0	0	1	0	0	0	0	0	0	0	0	0	0	0	0	0	1	Article
50439875	A Global Perspective on Psychosocial Risk Factors for Cardiovascular Disease	PROGRESS IN CARDIOVASCULAR DISEASES	7	3	Toll access article	Toll access	7	McGorrian-C	McGorrian	Catherine	Author, Reprint Author	1	MATER-MISERICORDIAE-UNIV-HOSP	MATER-MISERICORDIAE-UNIV-HOSP	MATER-MISERICORDIAE-UNIV-HOSP	Hospital	University: Unranked	University-Hospital	Hospital	1	0	0	0	0	0	0	1	0	0	1	0	0	0	0	0	0	0	0	0	0	0	0	0	1	Review
48635894	A Global Public Health Strategy for Autism Spectrum Disorders	AUTISM RESEARCH	8	7	Green OA article	Green OA	8	Shih-A	Shih	Andy	Author, Reprint Author	1	AUTISM-SPEAKS	AUTISM-SPEAKS	AUTISM-SPEAKS	Non-profit	Non-profit	Non-profit	Non-profit	1	0	0	0	0	1	0	0	0	0	0	1	0	0	0	0	0	0	0	0	0	0	0	0	1	Article
46825263	A Globally Available Internet-Based Patient Survey of Pemphigus Vulgaris: Epidemiology and Disease Characteristics	DERMATOLOGIC CLINICS	10	7	Toll access article	Toll access	10	Sinha-AA	Sinha	Animesh A.	Author, Reprint Author	1	SUNY-BUFFALO	SUNY-BUFFALO	SUNY-BUFFALO	University	University - Rank 201-500	University - Rank 201-500	University - Rank 201-500	1	0	0	0	0	0	0	1	0	0	0	0	0	0	0	0	0	0	1	0	0	1	0	0	1	Article
50249137	A Model for Measuring e-Health Status Across the World	TELEMEDICINE AND E-HEALTH	2	1	Toll access article	Toll access	2	Rabiei-R	Rabiei	Reza	Author	1	SHAHID-BEHESHTI-UNIV-MED-SCI	SHAHID-BEHESHTI-UNIV	SHAHID-BEHESHTI-UNIV	University	University - Rank 501+	University - Rank 501+	University - Rank 501+	1	0	0	0	0	0	0	1	0	0	0	0	0	0	0	0	0	0	0	1	0	1	0	0	1	Article
49626351	A New Air Quality Perception Scale for Global Assessment of Air Pollution Health Effects	RISK ANALYSIS	4	3	Toll access article	Toll access	4	Mesbah-M	Mesbah	Mounir	Author	3	UNIV-PARIS-06	PMCU	PMCU	University	University - Rank 101-200	University - Rank 101-200	University - Rank 101-200	1	0	0	0	0	0	0	1	0	0	0	0	0	0	0	0	0	1	0	0	0	1	0	0	1	Article
51887490	A Place for All at the Global Health Table: A Case Study about Creating an Interprofessional Global Health Project	JOURNAL OF LAW MEDICINE & ETHICS	1	2	Toll access article	Toll access	1	Rowthorn-V	Rowthorn	Virginia	Author, Reprint Author	1	UNIV-MARYLAND	UNIV-MARYLAND	UNIV-MARYLAND	University	University - Rank 051-100	University - Rank 51-100	University - Rank 051-100	1	0	0	0	0	0	0	1	0	0	0	0	0	0	0	0	1	0	0	0	0	1	0	0	1	Article
48486423	A Review of the Personal Health Records in Selected Countries and Iran	JOURNAL OF MEDICAL SYSTEMS	4	1	Green OA article	Green OA	4	Sadoughi-F	Sadoughi	Farahnaz	Author, Reprint Author	1	IRAN-UNIV-MED-SCI	IRAN-UNIV-MED-SCI	IRAN-UNIV-MED-SCI	University	University - Rank 501+	University - Rank 501+	University - Rank 501+	1	0	0	0	0	1	0	0	0	0	0	0	0	0	0	0	0	0	0	1	0	1	0	0	1	Article
50117523	A Roadmap to the Human Virome	PLOS PATHOGENS	1	2	Gold OA article (APC)	Gold OA	1	Delwart-E	Delwart	Eric	Author, Reprint Author	1	BLOOD-SYST-RES-INST	BLOOD-SYST-RES-INST	BLOOD-SYST-RES-INST	Company	Company	Company	Company	1	2250	0	1	0	0	0	0	1	0	0	0	0	0	0	0	0	0	0	0	0	0	1	0	1	Article
52146242	A Single Measure of Cancer Burden Combining Incidence with Mortality Rates for Worldwide Application	ASIAN PACIFIC JOURNAL OF CANCER PREVENTION	4	4	Gold OA article (non-APC)	Gold OA	4	Cho-WH	Cho	Woo Hyun	Author	4	EULJI-UNIV	EULJI-UNIV	EULJI-UNIV	University	University: Unranked	University: Unranked	University: Unranked	1	0	0	0	1	0	0	0	0	0	0	0	0	0	0	0	0	0	0	0	1	1	0	0	1	Article
44292644	A Summary of the Literature on Global Hearing Impairment: Current Status and Priorities for Action	OTOLOGY & NEUROTOLOGY	3	3	Toll access article	Toll access	3	Wilson-BS	Wilson	Blake S.	Author	1	DUKE-UNIV	DUKE-UNIV	DUKE-UNIV	University	University - Rank 001-025	University - Rank 001-025	University - Rank 001-025	1	0	0	0	0	0	0	1	0	0	0	0	0	0	1	0	0	0	0	0	0	1	0	1	0	Review
49631913	A Survey Of Primary Care Doctors In Ten Countries Shows Progress In Use Of Health Information Technology, Less In Other Areas	HEALTH AFFAIRS	7	2	Delayed OA article	Delayed OA	7	Applebaum-S	Applebaum	Sandra	Author	2	HARRIS-INTERACT	HARRIS-INTERACT	HARRIS-INTERACT	Company	Company	Company	Company	1	0	1	0	0	0	0	0	1	0	0	0	0	0	0	0	0	0	0	0	0	0	0	0	1	Article
50350475	A Survey of International Legal Instruments to Examine Their Effectiveness in Improving Global Health and in Realizing Health Rights	JOURNAL OF LAW MEDICINE & ETHICS	2	2	Toll access article	Toll access	2	Daar-AS	Daar	Abdallah S.	Author	2	UNIV-TORONTO	UNIV-TORONTO	UNIV-TORONTO	University	University - Rank 001-025	University - Rank 001-025	University - Rank 001-025	1	0	0	0	0	0	0	1	0	0	0	0	0	0	1	0	0	0	0	0	0	1	0	1	0	Article
52684221	A Toolkit to assess health needs for congenital disorders in low- and middle-income countries: an instrument for public health action	JOURNAL OF PUBLIC HEALTH	11	3	Green OA article	Green OA	11	Burton-H	Burton	H.	Author	1	FDN-GENOM-&-POPULAT-HLTH	FDN-GENOM-&-POPULAT-HLTH	FDN-GENOM-&-POPULAT-HLTH	Non-profit	Non-profit	Non-profit	Non-profit	1	0	0	0	0	1	0	0	0	0	0	1	0	0	0	0	0	0	0	0	0	0	0	0	1	Article
49150150	A Unique Approach to Business Strategy as a Means to Enable Change in Global Healthcare: A Case Study	CLINICAL CHEMISTRY	2	1	Hybrid article	Hybrid	2	Ryan-US	Ryan	Una S.	Author, Reprint Author	1	DIAGNOST-ALL-INC	DIAGNOST-ALL-INC	DIAGNOST-ALL-INC	Company	Company	Company	Company	1	3500	0	0	0	0	1	0	1	0	0	0	0	0	0	0	0	0	0	0	0	0	1	0	1	Article
49957986	A United Nations Global Health Panel for Global Health Governance	SOCIAL SCIENCE & MEDICINE	2	4	Toll access article	Toll access	2	Liang-BA	Liang	Bryan A.	Author	1	CALIF-WESTERN-SCH-LAW	CALIF-WESTERN-SCH-LAW	CALIF-WESTERN-SCH-LAW	University	University: Unranked	University: Unranked	University: Unranked	1	0	0	0	0	0	0	1	0	0	0	0	0	0	0	0	0	0	0	0	1	1	0	0	1	Article
49610480	A comparative risk assessment of burden of disease and injury attributable to 67 risk factors and risk factor clusters in 21 regions, 1990-2010: a systematic analysis for the Global Burden of Disease Study 2010	LANCET	207	118	Green OA article	Green OA	207	Ezzati-M	Ezzati	Majid	Author	66	UNIV-LONDON-IMPERIAL-COLL-SCI-TECHNOL-&-MED	UNIV-LONDON-IMPERIAL-COLL-SCI-TECHNOL-&-MED	UNIV-LONDON-IMPERIAL-COLL-SCI-TECHNOL-&-MED	University	University - Rank 001-025	University - Rank 001-025	University - Rank 001-025	1	0	0	0	0	1	0	0	0	0	0	0	0	0	1	0	0	0	0	0	0	1	0	1	0	Article
53719828	A concept in flux: questioning accountability in the context of global health cooperation	GLOBALIZATION AND HEALTH	4	4	Gold OA article (APC)	Gold OA	4	Wafula-F	Wafula	Francis	Author	2	CTR-RES-EXCELLENCE-RURAL-&-REMOTE-PRIMARY-HLTH-CA	CTR-RES-EXCELLENCE-RURAL-&-REMOTE-PRIMARY-HLTH-CA	CTR-RES-EXCELLENCE-RURAL-&-REMOTE-PRIMARY-HLTH-CA	Research institute	Research Institute	Research Institute	Research Institute	1	2145	0	1	0	0	0	0	0	0	0	0	1	0	0	0	0	0	0	0	0	0	1	0	1	Article
45240636	A framework for identifying similarities among countries to improve cross-national comparisons of health systems	HEALTH & PLACE	2	2	Toll access article	Toll access	2	Ameringer-CF	Ameringer	Carl F.	Author	2	VIRGINIA-COMMONWEALTH-UNIV	VIRGINIA-COMMONWEALTH-UNIV	VIRGINIA-COMMONWEALTH-UNIV	University	University: Unranked	University: Unranked	University: Unranked	1	0	0	0	0	0	0	1	0	0	0	0	0	0	0	0	0	0	0	0	1	1	0	0	1	Article
51091719	A global assessment of the oesophageal adenocarcinoma epidemic	GUT	4	6	Toll access article	Toll access	4	Nyren-O	Nyren	Olof	Author	2	KAROLINSKA-INST	KAROLINSKA-INST	KAROLINSKA-INST	University	University - Rank 026-050	University - Rank 026-050	University - Rank 026-050	1	0	0	0	0	0	0	1	0	0	0	0	0	0	0	1	0	0	0	0	0	1	0	1	0	Article
48605430	A global health perspective on the future of tobacco control	SALUD PUBLICA DE MEXICO	1	2	Gold OA article (non-APC)	Gold OA	1	Samet-JM	Samet	Jonathan M.	Author, Reprint Author	1	UNIV-SO-CALIF	UNIV-SO-CALIF	UNIV-SO-CALIF	University	University - Rank 051-100	University - Rank 51-100	University - Rank 051-100	1	0	0	0	1	0	0	0	0	0	0	0	0	0	0	0	1	0	0	0	0	1	0	0	1	Review
46463468	A global map for traumatic spinal cord injury epidemiology: towards a living data repository for injury prevention	SPINAL CORD	6	7	Toll access article	Toll access	6	Brown-D	Brown	D.	Author	7	AUSTIN-HOSP	AUSTIN-HOSP	AUSTIN-HOSP	Hospital	University - Rank 026-050	University-Hospital	Hospital	1	0	0	0	0	0	0	1	0	0	1	0	0	0	0	0	0	0	0	0	0	0	0	0	1	Article
48634424	A global perspective on sickle cell disease	PEDIATRIC BLOOD & CANCER	2	2	Toll access article	Toll access	2	Odame-I	Odame	Isaac	Author, Reprint Author	1	HOSP-SICK-CHILDREN	HOSP-SICK-CHILDREN	HOSP-SICK-CHILDREN	Hospital	University - Rank 001-025	University-Hospital	Hospital	1	0	0	0	0	0	0	1	0	0	1	0	0	0	0	0	0	0	0	0	0	0	0	0	1	Review
52144421	A global research agenda for family planning: results of an exercise for setting research priorities	BULLETIN OF THE WORLD HEALTH ORGANIZATION	5	2	Gold OA article (non-APC)	Gold OA	5	Temmerman-M	Temmerman	Marleen	Author	1	WHO	WHO	WHO	Non-profit	Non-profit	Non-profit	Non-profit	1	0	0	0	1	0	0	0	0	0	0	1	0	0	0	0	0	0	0	0	0	0	0	0	1	Article
50295896	A global view of hepatitis C: Physician knowledge, opinions, and perceived barriers to care	HEPATOLOGY	12	12	Green OA article	Green OA	12	Fried-MW	Fried	Michael W.	Author, Reprint Author	1	UNIV-N-CAROLINA	UNIV-N-CAROLINA	UNIV-N-CAROLINA	University	University - Rank 051-100	University - Rank 51-100	University - Rank 051-100	1	0	0	0	0	1	0	0	0	0	0	0	0	0	0	0	1	0	0	0	0	1	0	0	1	Article
46621496	A growing global network's role in outbreak response: AFHSC-GEIS 2008-2009	BMC PUBLIC HEALTH	15	10	Gold OA article (APC)	Gold OA	15	Blazes-DL	Blazes	David L.	Author	1	USAF	USAF	USAF	Government	Government	Government	Government	1	2145	0	1	0	0	0	0	0	1	0	0	0	0	0	0	0	0	0	0	0	0	1	0	1	Review
53440345	A history of One Health	REVUE SCIENTIFIQUE ET TECHNIQUE DE L OFFICE INTERNATIONAL DES EPIZOOTIES	2	2	Toll access article	Toll access	2	Leighton-FA	Leighton	F. A.	Author	2	UNIV-SASKATCHEWAN	UNIV-SASKATCHEWAN	UNIV-SASKATCHEWAN	University	University - Rank 201-500	University - Rank 201-500	University - Rank 201-500	1	0	0	0	0	0	0	1	0	0	0	0	0	0	0	0	0	0	1	0	0	1	0	0	1	Article
49061974	A life course approach to cardiovascular disease prevention	EUROPEAN JOURNAL OF CARDIOVASCULAR NURSING	4	6	Green OA article	Green OA	4	Braun-LT	Braun	Lynne T.	Author	5	RUSH-UNIV	RUSH-UNIV	RUSH-UNIV	University	University - Rank 201-500	University - Rank 201-500	University - Rank 201-500	1	0	0	0	0	1	0	0	0	0	0	0	0	0	0	0	0	0	1	0	0	1	0	0	1	Article
47437735	A mid-term assessment of progress towards the immunization coverage goal of the Global Immunization Vision and Strategy (GIVS)	BMC PUBLIC HEALTH	6	2	Gold OA article (APC)	Gold OA	6	OkwoBele-JM	Okwo-Bele	Jean Marie	Author	2	WORLD-HLTH-ORG	WHO	WHO	Non-profit	Non-profit	Non-profit	Non-profit	1	2145	0	1	0	0	0	0	0	0	0	1	0	0	0	0	0	0	0	0	0	0	1	0	1	Article
51069446	A model for 'reverse innovation' in health care	GLOBALIZATION AND HEALTH	2	2	Gold OA article (APC)	Gold OA	2	Lee-PT	Lee	Patrick T.	Author, Reprint Author	2	MASSACHUSETTS-GEN-HOSP	MASSACHUSETTS-GEN-HOSP	MASSACHUSETTS-GEN-HOSP	Hospital	University - Rank 001-025	University-Hospital	Hospital	1	2145	0	1	0	0	0	0	0	0	1	0	0	0	0	0	0	0	0	0	0	0	1	0	1	Article
46960240	A model for linkage between health professions education and health: FAIMER international faculty development initiatives	MEDICAL TEACHER	4	4	Toll access article	Toll access	4	Norcini-J	Norcini	John	Author	1	FAIMER	FAIMER-INST	FAIMER-INST	Non-profit	Non-profit	Non-profit	Non-profit	1	0	0	0	0	0	0	1	0	0	0	1	0	0	0	0	0	0	0	0	0	0	0	0	1	Article
45070439	A new approach to global health institutions? A case study of new vaccine introduction and the formation of the GAVI Alliance	SOCIAL SCIENCE & MEDICINE	3	2	Toll access article	Toll access	3	Bjune-G	Bjune	Gunnar	Author	1	UNIV-OSLO	UNIV-OSLO	UNIV-OSLO	University	University - Rank 101-200	University - Rank 101-200	University - Rank 101-200	1	0	0	0	0	0	0	1	0	0	0	0	0	0	0	0	0	1	0	0	0	1	0	0	1	Article
52100770	A new governance space for health	GLOBAL HEALTH ACTION	2	2	Gold OA article (APC)	Gold OA	2	Szabo-MMC	Szabo	Martina Marianna Cassar	Author	2	COLUMBIA-UNIV	COLUMBIA-UNIV	COLUMBIA-UNIV	University	University - Rank 001-025	University - Rank 001-025	University - Rank 001-025	1	1500	0	1	0	0	0	0	0	0	0	0	0	0	1	0	0	0	0	0	0	1	1	1	0	Review
52603324	A paediatric radiology text for resource-poor settings?	PEDIATRIC RADIOLOGY	2	1	Toll access article	Toll access	2	Ward-L	Ward	Laura	Author	1	GREAT-ORMOND-ST-HOSP-SICK-CHILDREN	GREAT-ORMOND-ST-HOSP-SICK-CHILDREN	GREAT-ORMOND-ST-HOSP-SICK-CHILDREN	Hospital	University - Rank 001-025	University-Hospital	Hospital	1	0	0	0	0	0	0	1	0	0	1	0	0	0	0	0	0	0	0	0	0	0	0	0	1	Article
49930692	A perspective from Bolivia on the implications of the World Report on Disability for people with communication disabilities	INTERNATIONAL JOURNAL OF SPEECH-LANGUAGE PATHOLOGY	1	1	Green OA article	Green OA	1	Buell-S	Buell	Susan	Author, Reprint Author	1	UNIV-E-ANGLIA	UNIV-E-ANGLIA	UNIV-E-ANGLIA	University	University - Rank 101-200	University - Rank 101-200	University - Rank 101-200	1	0	0	0	0	1	0	0	0	0	0	0	0	0	0	0	0	1	0	0	0	1	0	0	1	Article
49194814	A perspective on the future public health practitioner	PERSPECTIVES IN PUBLIC HEALTH	5	3	Toll access article	Toll access	5	Reilly-D	Reilly	David	Author	3	HOMEOPATH-HOSP	HOMEOPATH-HOSP	HOMEOPATH-HOSP	Hospital	Hospital	Hospital	Hospital	1	0	0	0	0	0	0	1	0	0	1	0	0	0	0	0	0	0	0	0	0	0	0	0	1	Article
47271181	A prospective study on neonatal mortality and its predictors in a rural area in Burkina Faso: Can MDG-4 be met by 2015?	JOURNAL OF PERINATOLOGY	5	3	Green OA article	Green OA	5	Tylleskar-T	Tylleskar	T.	Author	2	UNIV-BERGEN	UNIV-BERGEN	UNIV-BERGEN	University	University - Rank 201-500	University - Rank 201-500	University - Rank 201-500	1	0	0	0	0	1	0	0	0	0	0	0	0	0	0	0	0	0	1	0	0	1	0	0	1	Article
49932493	A review of global cancer burden: Trends, challenges, strategies, and a role for surgeons	JOURNAL OF SURGICAL ONCOLOGY	11	11	Green OA article	Green OA	11	Cazap-EL	Cazap	Eduardo L.	Author	10	UICC	UICC	UICC	Non-profit	Non-profit	Non-profit	Non-profit	1	0	0	0	0	1	0	0	0	0	0	1	0	0	0	0	0	0	0	0	0	0	0	0	1	Review
46928328	A review of global progress toward the Millennium Development Goal 1 Hunger Target	FOOD AND NUTRITION BULLETIN	2	2	Toll access article	Toll access	2	Pronyk-PM	Pronyk	Paul M.	Author	2	COLUMBIA-UNIV	COLUMBIA-UNIV	COLUMBIA-UNIV	University	University - Rank 001-025	University - Rank 001-025	University - Rank 001-025	1	0	0	0	0	0	0	1	0	0	0	0	0	0	1	0	0	0	0	0	0	1	0	1	0	Review
53440349	A review of the metrics for One Health benefits	REVUE SCIENTIFIQUE ET TECHNIQUE DE L OFFICE INTERNATIONAL DES EPIZOOTIES	4	3	Green OA article	Green OA	4	Rushton-J	Rushton	J.	Author	1	ROYAL-VET-COLL	ROYAL-VET-COLL	ROYAL-VET-COLL	University	University - Rank 201-500	University - Rank 201-500	University - Rank 201-500	1	0	0	0	0	1	0	0	0	0	0	0	0	0	0	0	0	0	1	0	0	1	0	0	1	Article
49217849	A review of the worldwide prevalence of vitiligo in children/adolescents and adults	INTERNATIONAL JOURNAL OF DERMATOLOGY	2	2	Toll access article	Toll access	2	Schallreuter-KU	Schallreuter	Karin Uta	Author, Reprint Author	1	ERNST-MORITZ-ARNDT-UNIV-GREIFSWALD	UNIV-GREIFSWALD	UNIV-GREIFSWALD	University	University - Rank 201-500	University - Rank 201-500	University - Rank 201-500	1	0	0	0	0	0	0	1	0	0	0	0	0	0	0	0	0	0	1	0	0	1	0	0	1	Article
48407199	A study of variations in the reported haemophilia B prevalence around the world	HAEMOPHILIA	5	5	Toll access article	Toll access	5	Brooker-M	Brooker	M.	Author	5	WORLD-FEDERAT-HEMOPHILIA	WORLD-FEDERAT-HEMOPHILIA	WORLD-FEDERAT-HEMOPHILIA	Non-profit	Non-profit	Non-profit	Non-profit	1	0	0	0	0	0	0	1	0	0	0	1	0	0	0	0	0	0	0	0	0	0	0	0	1	Article
49335481	A symposium and workshop report from the Global Nutrition and Epidemiologic Transition Initiative: nutrition transition and the global burden of type 2 diabetes	BRITISH JOURNAL OF NUTRITION	7	3	Toll access article	Toll access	7	Hu-FB	Hu	Frank B.	Author, Reprint Author	1	HARVARD-UNIV	HARVARD-UNIV	HARVARD-UNIV	University	University - Rank 001-025	University - Rank 001-025	University - Rank 001-025	1	0	0	0	0	0	0	1	0	0	0	0	0	0	1	0	0	0	0	0	0	1	0	1	0	Article
52544207	A systematic analysis of global anemia burden from 1990 to 2010	BLOOD	14	12	Green OA article	Green OA	14	Murray-CJL	Murray	Christopher J. L.	Author	1	UNIV-WASHINGTON	UNIV-WASHINGTON	UNIV-WASHINGTON	University	University - Rank 026-050	University - Rank 026-050	University - Rank 026-050	1	0	0	0	0	1	0	0	0	0	0	0	0	0	0	1	0	0	0	0	0	1	0	1	0	Article
49926774	A systematic review of the application and utility of geographical information systems for exploring disease-disease relationships in paediatric global health research: the case of anaemia and malaria	INTERNATIONAL JOURNAL OF HEALTH GEOGRAPHICS	3	3	Gold OA article (APC)	Gold OA	3	Cole-DC	Cole	Donald C.	Author	3	UNIV-TORONTO	UNIV-TORONTO	UNIV-TORONTO	University	University - Rank 001-025	University - Rank 001-025	University - Rank 001-025	1	2145	0	1	0	0	0	0	0	0	0	0	0	0	1	0	0	0	0	0	0	1	1	1	0	Review
53498750	A systematic review of the global prevalence of personality disorders in adult Asian populations	PERSONALITY AND MENTAL HEALTH	3	4	Toll access article	Toll access	3	Sen-P	Sen	Piyal	Author, Reprint Author	3	KINGS-COLL-LONDON	KINGS-COLL-LONDON	KINGS-COLL-LONDON	University	University - Rank 026-050	University - Rank 026-050	University - Rank 026-050	1	0	0	0	0	0	0	1	0	0	0	0	0	0	0	1	0	0	0	0	0	1	0	1	0	Article
52212322	A systematic review of vitamin D status in populations worldwide	BRITISH JOURNAL OF NUTRITION	9	3	Green OA article	Green OA	9	Hoffmann-K	Hoffmann	Kristina	Author, Reprint Author	1	HEIDELBERG-UNIV	UNIV-HEIDELBERG	UNIV-HEIDELBERG-HOSP	Hospital	University - Rank 026-050	University - Rank 026-050	University - Rank 026-050	1	0	0	0	0	1	0	0	0	0	0	0	0	0	0	1	0	0	0	0	0	1	0	1	0	Review
50099400	A very rare cancer in Down syndrome: medulloblastoma. Epidemiological data from 13 countries	JOURNAL OF NEURO-ONCOLOGY	22	22	Toll access article	Toll access	22	Rickert-C	Rickert	Christian	Author	22	VIVANTES-CLIN	VIVANTES-CLIN	VIVANTES-CLIN	Hospital	Hospital	Hospital	Hospital	1	0	0	0	0	0	0	1	0	0	1	0	0	0	0	0	0	0	0	0	0	0	0	0	1	Article
48911398	A worldwide investigation of tuberculosis epidemics	HEALTH CARE MANAGEMENT SCIENCE	2	2	Green OA article	Green OA	2	Hoad-KA	Hoad	Kathryn A.	Author, Reprint Author	1	UNIV-WARWICK	UNIV-WARWICK	UNIV-WARWICK	University	University - Rank 051-100	University - Rank 51-100	University - Rank 051-100	1	0	0	0	0	1	0	0	0	0	0	0	0	0	0	0	1	0	0	0	0	1	0	0	1	Article
52570376	A worldwide trend of increasing primary adenocarcinoma of the lung	SURGERY TODAY	2	1	Toll access article	Toll access	2	Saji-H	Saji	Hisashi	Author	1	ST-MARIANNA-UNIV	ST-MARIANNA-UNIV	ST-MARIANNA-UNIV	University	University: Unranked	University: Unranked	University: Unranked	1	0	0	0	0	0	0	1	0	0	0	0	0	0	0	0	0	0	0	0	1	1	0	0	1	Review
47246663	ACCELERATING THE DEVELOPMENT OF AN AIDS VACCINE: THE AIDS VACCINE FOR ASIA NETWORK (AVAN)	SOUTHEAST ASIAN JOURNAL OF TROPICAL MEDICINE AND PUBLIC HEALTH	18	14	Green OA article	Green OA	18	Shao-YM	Shao	Yiming	Author	14	NATL-CTR-AIDS-STD-CONTROL-&-PREVENT	NATL-CTR-AIDS-STD-CONTROL-&-PREVENT	NATL-CTR-AIDS-STD-CONTROL-&-PREVENT	Research institute	Research Institute	Research Institute	Research Institute	1	0	0	0	0	1	0	0	0	0	0	0	1	0	0	0	0	0	0	0	0	0	0	0	1	Article
46627435	Access to blood donation of men who have sex with men and impact on the risk of HIV transmission by transfusion: International overview	TRANSFUSION CLINIQUE ET BIOLOGIQUE	2	1	Toll access article	Toll access	2	Semaille-C	Semaille	C.	Author	1	INST-VEILLE-SANIT	INST-VEILLE-SANIT	INST-VEILLE-SANIT	Government	Government	Government	Government	1	0	0	0	0	0	0	1	0	1	0	0	0	0	0	0	0	0	0	0	0	0	0	0	1	Article
46827958	Access to care and medicines, burden of health care expenditures, and risk protection: Results from the World Health Survey	HEALTH POLICY	6	2	Green OA article	Green OA	1	Wagner-AK	Wagner	Anita K.	Author, Reprint Author	1	HARVARD-UNIV	HARVARD-UNIV	HARVARD-UNIV	University	University - Rank 001-025	University - Rank 001-025	University - Rank 001-025	1	0	0	0	0	1	0	0	0	0	0	0	0	0	1	0	0	0	0	0	0	1	0	1	0	Article
53662001	Access to safe abortion: progress and challenges since the 1994 International Conference on Population and Development (ICPD)	CONTRACEPTION	3	3	Toll access article	Toll access	3	Ortayli-N	Ortayli	Nuriye	Author	3	UNITED-NATIONS-POPULAT-FUND	UNITED-NATIONS-POPULAT-DIV	UNITED-NATIONS-POPULAT-DIV	Non-profit	Non-profit	Non-profit	Non-profit	1	0	0	0	0	0	0	1	0	0	0	1	0	0	0	0	0	0	0	0	0	0	0	0	1	Review
46280221	Accounting for model uncertainty in estimating global burden of disease	BULLETIN OF THE WORLD HEALTH ORGANIZATION	7	7	Gold OA article (non-APC)	Gold OA	7	Burton-AH	Burton	Anthony H.	Author	7	WHO	WHO	WHO	Non-profit	Non-profit	Non-profit	Non-profit	1	0	0	0	1	0	0	0	0	0	0	1	0	0	0	0	0	0	0	0	0	0	0	0	1	Article
48189223	Accounting for water quality in monitoring access to safe drinking-water as part of the Millennium Development Goals: lessons from five countries	BULLETIN OF THE WORLD HEALTH ORGANIZATION	6	4	Gold OA article (non-APC)	Gold OA	6	Bartram-JK	Bartram	Jamie K.	Author	4	UNIV-N-CAROLINA	UNIV-N-CAROLINA	UNIV-N-CAROLINA	University	University - Rank 051-100	University - Rank 51-100	University - Rank 051-100	1	0	0	0	1	0	0	0	0	0	0	0	0	0	0	0	1	0	0	0	0	1	0	0	1	Article
44941080	Achieving Millennium Development Goal 5, the Improvement of Maternal Health	JOGNN-JOURNAL OF OBSTETRIC GYNECOLOGIC AND NEONATAL NURSING	2	2	Toll access article	Toll access	2	Edwards-JE	Edwards	Joan E.	Author	2	TEXAS-WOMANS-UNIV	TEXAS-WOMANS-UNIV	TEXAS-WOMANS-UNIV	University	University: Unranked	University: Unranked	University: Unranked	1	0	0	0	0	0	0	1	0	0	0	0	0	0	0	0	0	0	0	0	1	1	0	0	1	Article
50163639	Acute kidney injury: global health alert	KIDNEY INTERNATIONAL	3	3	Green OA article	Green OA	3	Mehta-RL	Mehta	Ravindra L.	Author	3	UNIV-CALIF-SAN-DIEGO	UNIV-CALIF-SAN-DIEGO	UNIV-CALIF-SAN-DIEGO	University	University - Rank 026-050	University - Rank 026-050	University - Rank 026-050	1	0	0	0	0	1	0	0	0	0	0	0	0	0	0	1	0	0	0	0	0	1	0	1	0	Review
51868671	Ad global, but think local: accountability at the frontlines	REPRODUCTIVE HEALTH MATTERS	2	1	Toll access article	Toll access	2	Schaaf-M	Schaaf	Marta	Author, Reprint Author	1	COLUMBIA-UNIV	COLUMBIA-UNIV	COLUMBIA-UNIV	University	University - Rank 001-025	University - Rank 001-025	University - Rank 001-025	1	0	0	0	0	0	0	1	0	0	0	0	0	0	1	0	0	0	0	0	0	1	0	1	0	Article
47666228	Adaptive Trial Design: Could We Use This Approach to Improve Clinical Trials in the Field of Global Health?	AMERICAN JOURNAL OF TROPICAL MEDICINE AND HYGIENE	1	1	Green OA article	Green OA	1	Lang-T	Lang	Trudie	Author, Reprint Author	1	UNIV-OXFORD	UNIV-OXFORD	UNIV-OXFORD	University	University - Rank 001-025	University - Rank 001-025	University - Rank 001-025	1	0	0	0	0	1	0	0	0	0	0	0	0	0	1	0	0	0	0	0	0	1	0	1	0	Article
50020689	Addiction in the family is a major but neglected contributor to the global burden of adult ill-health	SOCIAL SCIENCE & MEDICINE	5	6	Green OA article	Green OA	5	Copello-A	Copello	Alex	Author	1	UNIV-BIRMINGHAM	UNIV-BIRMINGHAM	UNIV-BIRMINGHAM	University	University - Rank 101-200	University - Rank 101-200	University - Rank 101-200	1	0	0	0	0	1	0	0	0	0	0	0	0	0	0	0	0	1	0	0	0	1	0	0	1	Article
45050863	Addressing Global Health Governance Challenges through a New Mechanism: The Proposal for a Committee C of the World Health Assembly	JOURNAL OF LAW MEDICINE & ETHICS	3	3	Toll access article	Toll access	3	Silberschmidt-G	Silberschmidt	Gaudenz	Author	3	FED-OFF-PUBL-HLTH	FED-OFF-PUBL-HLTH	FED-OFF-PUBL-HLTH	Government	Government	Government	Government	1	0	0	0	0	0	0	1	0	1	0	0	0	0	0	0	0	0	0	0	0	0	0	0	1	Article
44941079	Addressing Poverty, Education, and Gender Equality to Improve the Health of Women Worldwide	JOGNN-JOURNAL OF OBSTETRIC GYNECOLOGIC AND NEONATAL NURSING	2	4	Toll access article	Toll access	2	Cesario-SK	Cesario	Sandra K.	Author	4	TEXAS-WOMANS-UNIV	TEXAS-WOMANS-UNIV	TEXAS-WOMANS-UNIV	University	University: Unranked	University: Unranked	University: Unranked	1	0	0	0	0	0	0	1	0	0	0	0	0	0	0	0	0	0	0	0	1	1	0	0	1	Article
49930693	Addressing education of speech-language pathologists in the World Report on Disability: Development of a speech-language pathology program in Malaysia	INTERNATIONAL JOURNAL OF SPEECH-LANGUAGE PATHOLOGY	4	1	Green OA article	Green OA	1	Ahmad-K	Ahmad	Kartini	Author, Reprint Author	1	UNIV-KEBANGSAAN-MALAYSIA	UNIV-KEBANGSAAN-MALAYSIA	UNIV-KEBANGSAAN-MALAYSIA	University	University - Rank 501+	University - Rank 501+	University - Rank 501+	1	0	0	0	0	1	0	0	0	0	0	0	0	0	0	0	0	0	0	1	0	1	0	0	1	Article
48598308	Addressing the Implementation Gap in Global Road Safety: Exploring Features of an Effective Response and Introducing a 10-Country Program	AMERICAN JOURNAL OF PUBLIC HEALTH	7	6	Green OA article	Green OA	7	Peden-M	Peden	Margie	Author	6	WHO	WHO	WHO	Non-profit	Non-profit	Non-profit	Non-profit	1	0	0	0	0	1	0	0	0	0	0	1	0	0	0	0	0	0	0	0	0	0	0	0	1	Article
50058559	Addressing the challenge of neonatal mortality	TROPICAL MEDICINE & INTERNATIONAL HEALTH	2	1	Hybrid article	Hybrid	2	Cousens-S	Cousens	S.	Author	1	UNIV-LONDON-LONDON-SCH-HYG-&-TROP-MED	UNIV-LONDON-LONDON-SCH-HYG-&-TROP-MED	UNIV-LONDON-LONDON-SCH-HYG-&-TROP-MED	University	University - Rank 001-025	University - Rank 001-025	University - Rank 001-025	1	3000	0	0	0	0	1	0	0	0	0	0	0	0	1	0	0	0	0	0	0	1	1	1	0	Review
48446867	Adolescent Health 4 Health of the world's adolescents: a synthesis of internationally comparable data	LANCET	12	13	Toll access article	Toll access	12	Ferguson-J	Ferguson	Jane	Author	8	WHO	WHO	WHO	Non-profit	Non-profit	Non-profit	Non-profit	1	0	0	0	0	0	0	1	0	0	0	1	0	0	0	0	0	0	0	0	0	0	0	0	1	Article
53278831	Adoption and compliance in second-hand smoking bans: a global econometric analysis	INTERNATIONAL JOURNAL OF PUBLIC HEALTH	2	1	Green OA article	Green OA	2	Neumayer-E	Neumayer	Eric	Author	1	UNIV-LONDON-LONDON-SCH-ECON-&-POLIT-SCI	LONDON-SCH-ECON	LONDON-SCH-ECON	University	University - Rank 001-025	University - Rank 001-025	University - Rank 001-025	1	0	0	0	0	1	0	0	0	0	0	0	0	0	1	0	0	0	0	0	0	1	0	1	0	Article
52745615	Adoption of national recommendations related to use of antiretroviral therapy before and shortly following the launch of the 2013 WHO consolidated guidelines	AIDS	8	1	Toll access article	Toll access	8	Doherty-MC	Doherty	Meg C.	Author	1	WHO	WHO	WHO	Non-profit	Non-profit	Non-profit	Non-profit	1	0	0	0	0	0	0	1	0	0	0	1	0	0	0	0	0	0	0	0	0	0	0	0	1	Article
52488291	Adult haemophagocytic syndrome	LANCET	5	4	Toll access article	Toll access	5	Bosch-X	Bosch	Xavier	Author, Reprint Author	2	UNIV-BARCELONA	UNIV-BARCELONA	UNIV-BARCELONA	University	University - Rank 201-500	University - Rank 201-500	University - Rank 201-500	1	0	0	0	0	0	0	1	0	0	0	0	0	0	0	0	0	0	1	0	0	1	0	0	1	Article
47569714	Advance market commitment for pneumococcal vaccines: putting theory into practice	BULLETIN OF THE WORLD HEALTH ORGANIZATION	6	4	Gold OA article (non-APC)	Gold OA	6	McAdams-S	McAdams	Susan	Author	4	WORLD-BANK	WORLD-BANK	WORLD-BANK	Non-profit	Non-profit	Non-profit	Non-profit	1	0	0	0	1	0	0	0	0	0	0	1	0	0	0	0	0	0	0	0	0	0	0	0	1	Article
45123545	Advancing health equity in the global marketplace: How human rights can help	SOCIAL SCIENCE & MEDICINE	4	3	Green OA article	Green OA	4	DeVogli-R	De Vogli	Roberto	Author	3	UCL	UCL	UCL	University	University - Rank 001-025	University - Rank 001-025	University - Rank 001-025	1	0	0	0	0	1	0	0	0	0	0	0	0	0	1	0	0	0	0	0	0	1	0	1	0	Article
52372021	Advancing social and economic development by investing in women's and children's health: a new Global Investment Framework	LANCET	28	17	Toll access article	Toll access	28	Bustreo-F	Bustreo	Flavia	Author	2	WORLD-HLTH-ORG	WHO	WHO	Non-profit	Non-profit	Non-profit	Non-profit	1	0	0	0	0	0	0	1	0	0	0	1	0	0	0	0	0	0	0	0	0	0	0	0	1	Article
49610474	Age-specific and sex-specific mortality in 187 countries, 1970-2010: a systematic analysis for the Global Burden of Disease Study 2010	LANCET	9	2	Toll access article	Toll access	9	Murray-CJL	Murray	Christopher J. L.	Author	1	UNIV-WASHINGTON	UNIV-WASHINGTON	UNIV-WASHINGTON	University	University - Rank 026-050	University - Rank 026-050	University - Rank 026-050	1	0	0	0	0	0	0	1	0	0	0	0	0	0	0	1	0	0	0	0	0	1	0	1	0	Article
51044317	Ageing as a global public health challenge: From complexity reduction to aid effectiveness	GLOBAL PUBLIC HEALTH	2	2	Toll access article	Toll access	2	Ward-PS	Ward	Patricia S.	Author	2	YORK-UNIV	YORK-UNIV	YORK-UNIV	University	University - Rank 201-500	University - Rank 201-500	University - Rank 201-500	1	0	0	0	0	0	0	1	0	0	0	0	0	0	0	0	0	0	1	0	0	1	0	0	1	Article
46707337	Aging, Transition, and Estimating the Global Burden of Disease	PLOS ONE	3	2	Gold OA article (APC)	Gold OA	3	Horwitz-RI	Horwitz	Ralph I.	Author	2	GLAXOSMITHKLINE-INC	GLAXOSMITHKLINE-INC	GLAXOSMITHKLINE-INC	Company	Company	Company	Company	1	1495	0	1	0	0	0	0	1	0	0	0	0	0	0	0	0	0	0	0	0	0	1	0	1	Article
44543921	Airports, localities and disease: Representations of global travel during the H1N1 pandemic	HEALTH & PLACE	3	2	Toll access article	Toll access	3	Budd-L	Budd	Lucy	Author	2	UNIV-LOUGHBOROUGH	UNIV-LOUGHBOROUGH	UNIV-LOUGHBOROUGH	University	University - Rank 201-500	University - Rank 201-500	University - Rank 201-500	1	0	0	0	0	0	0	1	0	0	0	0	0	0	0	0	0	0	1	0	0	1	0	0	1	Article
46925063	Alcohol-related negative consequences among drinkers around the world	ADDICTION	10	14	Green OA article	Green OA	10	Gmel-G	Gmel	Gerhard	Author	1	CTR-ADDICT-&-MENTAL-HLTH	CTR-ADDICT-&-MENTAL-HLTH	CTR-ADDICT-&-MENTAL-HLTH	Research institute	Research Institute	Research Institute	Research Institute	1	0	0	0	0	1	0	0	0	0	0	0	1	0	0	0	0	0	0	0	0	0	0	0	1	Article
51805239	Alcoholic liver disease and pancreatitis: Global health problems being addressed by the US National Institute on Alcohol Abuse and Alcoholism	JOURNAL OF GASTROENTEROLOGY AND HEPATOLOGY	2	1	Green OA article	Green OA	2	Murray-MM	Murray	Margaret M.	Author	1	NIAAA	NIAAA	NIAAA	Government	Government	Government	Government	1	0	0	0	0	1	0	0	0	1	0	0	0	0	0	0	0	0	0	0	0	0	0	0	1	Review
48043107	American Plastic Surgery and Global Health A Brief History	ANNALS OF PLASTIC SURGERY	5	4	Toll access article	Toll access	5	Meara-JG	Meara	John G.	Author	1	CHILDRENS-HOSP	CHILDRENS-HOSP-BOSTON	CHILDRENS-HOSP-BOSTON	Hospital	University - Rank 001-025	University-Hospital	Hospital	1	0	0	0	0	0	0	1	0	0	1	0	0	0	0	0	0	0	0	0	0	0	0	0	1	Review
48663884	An International registry on Autoinflammatory diseases: the Eurofever experience	ANNALS OF THE RHEUMATIC DISEASES	24	25	Toll access article	Toll access	24	Gattorno-M	Gattorno	Marco	Author, Reprint Author	1	UNIV-GENOVA-5	UNIV-GENOA	UNIV-GENOA	University	University - Rank 201-500	University - Rank 201-500	University - Rank 201-500	1	0	0	0	0	0	0	1	0	0	0	0	0	0	0	0	0	0	1	0	0	1	0	0	1	Article
49585521	An analysis of GAVI, the Global Fund and World Bank support for human resources for health in developing countries	HEALTH POLICY AND PLANNING	5	5	Hybrid article	Hybrid	5	Kumar-R	Kumar	Ranjana	Author	4	GLOBAL-ALLIANCE-VACCINES-&-IMMUNISAT-SECRETARIAT	GLOBAL-ALLIANCE-VACCINES-&-IMMUNISAT	GLOBAL-ALLIANCE-VACCINES-&-IMMUNISAT	Non-profit	Non-profit	Non-profit	Non-profit	1	2400	0	0	0	0	1	0	0	0	0	1	0	0	0	0	0	0	0	0	0	0	1	0	1	Article
51849208	An estimate of asthma prevalence in Africa: a systematic analysis	CROATIAN MEDICAL JOURNAL	4	1	Gold OA article (non-APC)	Gold OA	4	Campbell-H	Campbell	Harry	Author	1	UNIV-EDINBURGH	UNIV-EDINBURGH	UNIV-EDINBURGH	University	University - Rank 026-050	University - Rank 026-050	University - Rank 026-050	1	0	0	0	1	0	0	0	0	0	0	0	0	0	0	1	0	0	0	0	0	1	0	1	0	Article
48609118	An estimation of the worldwide economic and health burden of visual impairment	GLOBAL PUBLIC HEALTH	8	4	Toll access article	Toll access	8	Chua-K	Chua	Kathleen	Author	2	ACCESS-ECON-PTY-LTD	ACCESS-ECON-PTY-LTD	ACCESS-ECON-PTY-LTD	Company	Company	Company	Company	1	0	0	0	0	0	0	1	1	0	0	0	0	0	0	0	0	0	0	0	0	0	0	0	1	Article
50139020	An ethics curriculum for short-term global health trainees	GLOBALIZATION AND HEALTH	5	5	Gold OA article (APC)	Gold OA	5	Sugarman-J	Sugarman	Jeremy	Author	1	JOHNS-HOPKINS-BERMAN-INST-BIOETH	JOHNS-HOPKINS-UNIV	JOHNS-HOPKINS-UNIV	University	University - Rank 001-025	University - Rank 001-025	University - Rank 001-025	1	2145	0	1	0	0	0	0	0	0	0	0	0	0	1	0	0	0	0	0	0	1	1	1	0	Article
51230705	An evaluation of the global network of field epidemiology and laboratory training programmes: a resource for improving public health capacity and increasing the number of public health professionals worldwide	HUMAN RESOURCES FOR HEALTH	3	3	Gold OA article (APC)	Gold OA	3	Kelly-PM	Kelly	Paul M.	Author	2	ACT-GOVT-HLTH-DIRECTORATE	ACT-GOVT-HLTH-DIRECTORATE	ACT-GOVT-HLTH-DIRECTORATE	Government	Government	Government	Government	1	2450	0	1	0	0	0	0	0	1	0	0	0	0	0	0	0	0	0	0	0	0	1	0	1	Article
50671719	An inter-professional "advocacy and activism in global health': module for the training of physician-advocates	GLOBAL HEALTH PROMOTION	4	4	Toll access article	Toll access	4	Friedland-G	Friedland	Gerald	Author	4	YALE-UNIV	YALE-UNIV	YALE-UNIV	University	University - Rank 001-025	University - Rank 001-025	University - Rank 001-025	1	0	0	0	0	0	0	1	0	0	0	0	0	0	1	0	0	0	0	0	0	1	0	1	0	Article
44248166	An international compendium of mutations in the SCN5A-encoded cardiac sodium channel in patients referred for Brugada syndrome genetic testing	HEART RHYTHM	29	26	Green OA article	Green OA	29	Ackerman-MJ	Ackerman	Michael J.	Author, Reprint Author	1	MAYO-CLIN	MAYO-CLIN	MAYO-CLIN	Hospital	University - Rank 001-025	University-Hospital	Hospital	1	0	0	0	0	1	0	0	0	0	1	0	0	0	0	0	0	0	0	0	0	0	0	0	1	Article
47798731	An international health proposal to harmonize cross-border health surveillance	REVISTA PANAMERICANA DE SALUD PUBLICA-PAN AMERICAN JOURNAL OF PUBLIC HEALTH	3	3	Gold OA article (non-APC)	Gold OA	3	Vergara-JFV	Valderrama Vergara	Jose Fernando	Author, Reprint Author	3	MINIST-PROTECC-SOCIAL	MINIST-PROTECC-SOCIAL	MINIST-PROTECC-SOCIAL	Government	Government	Government	Government	1	0	0	0	1	0	0	0	0	1	0	0	0	0	0	0	0	0	0	0	0	0	0	0	1	Article
45253363	An international review of musculoskeletal disorders in the dental hygiene profession	INTERNATIONAL DENTAL JOURNAL	3	1	Green OA article	Green OA	3	Cockrell-D	Cockrell	Deborah	Author	1	UNIV-NEWCASTLE	UNIV-NEWCASTLE	UNIV-NEWCASTLE	University	University - Rank 101-200	University - Rank 101-200	University - Rank 101-200	1	0	0	0	0	1	0	0	0	0	0	0	0	0	0	0	0	1	0	0	0	1	0	0	1	Review
52805852	An open debate about the object and purpose of global health knowledge in the context of an interdisciplinary research partnership on HIV/STI prevention priorities in Peru	GLOBALIZATION AND HEALTH	3	4	Gold OA article (APC)	Gold OA	3	Arocha-JF	Arocha	Jose F.	Author	4	UNIV-WATERLOO	UNIV-WATERLOO	UNIV-WATERLOO	University	University - Rank 101-200	University - Rank 101-200	University - Rank 101-200	1	2145	0	1	0	0	0	0	0	0	0	0	0	0	0	0	0	1	0	0	0	1	1	0	1	Article
53064346	An unknown quantity-The worldwide prevalence of epilepsy	EPILEPSIA	3	3	Hybrid article	Hybrid	3	Sander-JW	Sander	Josemir W.	Author	1	UCL-INST-NEUROL	UCL	UCL	University	University - Rank 001-025	University - Rank 001-025	University - Rank 001-025	1	3000	0	0	0	0	1	0	0	0	0	0	0	0	1	0	0	0	0	0	0	1	1	1	0	Article
52060591	Aneurysm Global Epidemiology Study Public Health Measures Can Further Reduce Abdominal Aortic Aneurysm Mortality	CIRCULATION	7	2	Hybrid article	Hybrid	7	Choke-E	Choke	Edward	Author, Reprint Author	1	UNIV-LEICESTER	UNIV-LEICESTER	UNIV-LEICESTER	University	University - Rank 101-200	University - Rank 101-200	University - Rank 101-200	1	4600	0	0	0	0	1	0	0	0	0	0	0	0	0	0	0	1	0	0	0	1	1	0	1	Article
53440355	Animal and human influenzas	REVUE SCIENTIFIQUE ET TECHNIQUE DE L OFFICE INTERNATIONAL DES EPIZOOTIES	2	1	Toll access article	Toll access	2	Yen-HL	Yen	H. -L.	Author	1	UNIV-HONG-KONG	UNIV-HONG-KONG	UNIV-HONG-KONG	University	University - Rank 026-050	University - Rank 026-050	University - Rank 026-050	1	0	0	0	0	0	0	1	0	0	0	0	0	0	0	1	0	0	0	0	0	1	0	1	0	Article
46005204	Animal production food safety: priority pathogens for standard setting by the World Organisation for Animal Health	REVUE SCIENTIFIQUE ET TECHNIQUE DE L OFFICE INTERNATIONAL DES EPIZOOTIES	3	2	Toll access article	Toll access	3	Kahn-S	Kahn	S.	Author	2	WORLD-ORG-ANIM-HLTH	WORLD-ORG-ANIM-HLTH	WORLD-ORG-ANIM-HLTH	Non-profit	Non-profit	Non-profit	Non-profit	1	0	0	0	0	0	0	1	0	0	0	1	0	0	0	0	0	0	0	0	0	0	0	0	1	Article
52603296	Another international imaging society-to what end? The World Federation of Pediatric Imaging: one voice, a common message, a unified network	PEDIATRIC RADIOLOGY	3	3	Toll access article	Toll access	3	Boechat-MI	Boechat	Maria Ines	Author, Reprint Author	3	UNIV-CALIF-LOS-ANGELES	UCLA	UCLA	University	University - Rank 001-025	University - Rank 001-025	University - Rank 001-025	1	0	0	0	0	0	0	1	0	0	0	0	0	0	1	0	0	0	0	0	0	1	0	1	0	Article
46563116	Anthelmintic resistance in nematode parasites of cattle: a global issue?	TRENDS IN PARASITOLOGY	2	1	Toll access article	Toll access	2	Leathwick-DM	Leathwick	Dave M.	Author	1	AGRES-GRASSLANDS	AGRES-GRASSLANDS	AGRES-GRASSLANDS	Research institute	Research Institute	Research Institute	Research Institute	1	0	0	0	0	0	0	1	0	0	0	0	1	0	0	0	0	0	0	0	0	0	0	0	1	Review
53440359	Anthrax as an example of the One Health concept	REVUE SCIENTIFIQUE ET TECHNIQUE DE L OFFICE INTERNATIONAL DES EPIZOOTIES	2	3	Toll access article	Toll access	2	Frean-J	Frean	J.	Author	2	NATL-INST-COMMUNICABLE-DIS	NATL-INST-COMMUNICABLE-DIS	NATL-INST-COMMUNICABLE-DIS	Research institute	Research Institute	Research Institute	Research Institute	1	0	0	0	0	0	0	1	0	0	0	0	1	0	0	0	0	0	0	0	0	0	0	0	1	Article
46025197	Anthropology, knowledge-flows and global health	GLOBAL PUBLIC HEALTH	5	6	Green OA article	Green OA	5	Das-V	Das	V.	Author	6	JOHNS-HOPKINS-UNIV	JOHNS-HOPKINS-UNIV	JOHNS-HOPKINS-UNIV	University	University - Rank 001-025	University - Rank 001-025	University - Rank 001-025	1	0	0	0	0	1	0	0	0	0	0	0	0	0	1	0	0	0	0	0	0	1	0	1	0	Article
44044593	Apheresis Technologies and Clinical Applications: The 2007 International Apheresis Registry	THERAPEUTIC APHERESIS AND DIALYSIS	5	2	Green OA article	Green OA	5	Rybicki-LA	Rybicki	Lisa A.	Author	2	CLEVELAND-CLIN	CLEVELAND-CLIN	CLEVELAND-CLIN	Hospital	University - Rank 101-200	University-Hospital	Hospital	1	0	0	0	0	1	0	0	0	0	1	0	0	0	0	0	0	0	0	0	0	0	0	0	1	Article
48250492	Applicability of stroke-unit care to low-income and middle-income countries	LANCET NEUROLOGY	3	2	Toll access article	Toll access	2	deVilliers-L	de Villiers	Linda	Author	2	UNIV-CAPE-TOWN	UNIV-CAPE-TOWN	UNIV-CAPE-TOWN	University	University - Rank 101-200	University - Rank 101-200	University - Rank 101-200	1	0	0	0	0	0	0	1	0	0	0	0	0	0	0	0	0	1	0	0	0	1	0	0	1	Review
43911006	Application of a Partnership Model for Transformative and Sustainable International Development	PUBLIC HEALTH NURSING	4	2	Toll access article	Toll access	3	Hewitt-HH	Hewitt	Hermi H.	Author	2	UNIV-W-INDIES	UNIV-W-INDIES	UNIV-W-INDIES	University	University: Unranked	University: Unranked	University: Unranked	1	0	0	0	0	0	0	1	0	0	0	0	0	0	0	0	0	0	0	0	1	1	0	0	1	Article
53440356	Applying the One Health principles: a trans-sectoral coordination framework for preventing and responding to Rift Valley fever outbreaks	REVUE SCIENTIFIQUE ET TECHNIQUE DE L OFFICE INTERNATIONAL DES EPIZOOTIES	2	4	Toll access article	Toll access	2	Formenty-P	Formenty	P.	Author	4	WHO	WHO	WHO	Non-profit	Non-profit	Non-profit	Non-profit	1	0	0	0	0	0	0	1	0	0	0	1	0	0	0	0	0	0	0	0	0	0	0	0	1	Article
47853617	Apropos "Outbreak of Chikungunya in the Republic of Congo and the global picture"	JOURNAL OF INFECTION IN DEVELOPING COUNTRIES	2	1	Gold OA article (non-APC)	Gold OA	2	Agarwal-N	Agarwal	Nirmala	Author	1	ST-PARMANAND-HOSP	ST-PARMANAND-HOSP	ST-PARMANAND-HOSP	Hospital	Hospital	Hospital	Hospital	1	0	0	0	1	0	0	0	0	0	1	0	0	0	0	0	0	0	0	0	0	0	0	0	1	Article
48433583	Are Countries Using Global Fund Support to Implement HIV Drug Resistance Surveillance? A Review of Funded HIV Grants	CLINICAL INFECTIOUS DISEASES	5	2	Hybrid article	Hybrid	5	Bertagnolio-S	Bertagnolio	Silvia	Author	1	WORLD-HLTH-ORG	WHO	WHO	Non-profit	Non-profit	Non-profit	Non-profit	1	3500	0	0	0	0	1	0	0	0	0	1	0	0	0	0	0	0	0	0	0	0	1	0	1	Review
48064213	Are We There Yet? Preparing Canadian Medical Students for Global Health Electives	ACADEMIC MEDICINE	6	5	Toll access article	Toll access	5	Xu-KY	Xu	Kunyong	Author	5	MCMASTER-UNIV	MCMASTER-UNIV	MCMASTER-UNIV	University	University - Rank 101-200	University - Rank 101-200	University - Rank 101-200	1	0	0	0	0	0	0	1	0	0	0	0	0	0	0	0	0	1	0	0	0	1	0	0	1	Article
49976789	Are marine environmental pollutants influencing global patterns of human disease?	MARINE ENVIRONMENTAL RESEARCH	4	2	Toll access article	Toll access	4	Holgate-ST	Holgate	S. T.	Author	2	UNIV-SOUTHAMPTON	UNIV-SOUTHAMPTON	UNIV-SOUTHAMPTON	University	University - Rank 101-200	University - Rank 101-200	University - Rank 101-200	1	0	0	0	0	0	0	1	0	0	0	0	0	0	0	0	0	1	0	0	0	1	0	0	1	Article
53171619	Assessing and Mitigating the Risks for Polio Outbreaks in Polio-Free Countries - Africa, 2013-2014	MMWR-MORBIDITY AND MORTALITY WEEKLY REPORT	7	1	Gold OA article (non-APC)	Gold OA	7	Wassilak-SGF	Wassilak	Steven G. F.	Author	1	CDC	CDC	CDC	Government	Government	Government	Government	1	0	0	0	1	0	0	0	0	1	0	0	0	0	0	0	0	0	0	0	0	0	0	0	1	Article
51322250	Assessing global partnerships in graduate nursing	NURSE EDUCATION TODAY	4	4	Green OA article	Green OA	4	Gagnon-AJ	Gagnon	Anita J.	Author, Reprint Author	1	MCGILL-UNIV	MCGILL-UNIV	MCGILL-UNIV	University	University - Rank 026-050	University - Rank 026-050	University - Rank 026-050	1	0	0	0	0	1	0	0	0	0	0	0	0	0	0	1	0	0	0	0	0	1	0	1	0	Article
47569713	Assessing health system interventions: key points when considering the value of randomization	BULLETIN OF THE WORLD HEALTH ORGANIZATION	3	3	Gold OA article (non-APC)	Gold OA	3	Todd-J	Todd	Jim	Author	3	LONDON-SCH-HYG-&-TROP-MED	UCL	UCL	University	University - Rank 001-025	University - Rank 001-025	University - Rank 001-025	1	0	0	0	1	0	0	0	0	0	0	0	0	0	1	0	0	0	0	0	0	1	0	1	0	Article
50446921	Assessing new strategies for TB diagnosis in low- and middle-income countries	BRAZILIAN JOURNAL OF INFECTIOUS DISEASES	7	6	Gold OA article (non-APC)	Gold OA	7	Squire-SB	Bertel Squire	S.	Author	6	FUNDACAO-OSWALD-CRUZ	FUNDACAO-OSWALDO-CRUZ	FUNDACAO-OSWALDO-CRUZ	Research institute	Research Institute	Research Institute	Research Institute	1	0	0	0	1	0	0	0	0	0	0	0	1	0	0	0	0	0	0	0	0	0	0	0	1	Article
47798709	Assessment of core capacities for enforcement of the International Health Regulations at points of entry in Uruguay	REVISTA PANAMERICANA DE SALUD PUBLICA-PAN AMERICAN JOURNAL OF PUBLIC HEALTH	3	1	Gold OA article (non-APC)	Gold OA	3	Rosa-R	Rosa	Raquel	Author	1	MINIST-SALUD-PUBL	MINIST-SALUD-PUBL	MINIST-SALUD-PUBL	Government	Government	Government	Government	1	0	0	0	1	0	0	0	0	1	0	0	0	0	0	0	0	0	0	0	0	0	0	0	1	Article
52635722	Assessment of the worldwide burden of critical illness: the Intensive Care Over Nations (ICON) audit	LANCET RESPIRATORY MEDICINE	12	11	Green OA article	Green OA	12	Sakr-Y	Sakr	Yasser	Author	7	JENA-UNIV-HOSP	JENA-UNIV-HOSP	JENA-UNIV-HOSP	Hospital	University: Unranked	University-Hospital	Hospital	1	0	0	0	0	1	0	0	0	0	1	0	0	0	0	0	0	0	0	0	0	0	0	0	1	Article
52136832	Associations between DSM-IV mental disorders and subsequent self-reported diagnosis of cancer	JOURNAL OF PSYCHOSOMATIC RESEARCH	20	1	Green OA article	Green OA	20	Scott-KM	Scott	Kate M.	Author	1	UNIV-ULSTER	UNIV-ULSTER	UNIV-ULSTER	University	University - Rank 501+	University - Rank 501+	University - Rank 501+	1	0	0	0	0	1	0	0	0	0	0	0	0	0	0	0	0	0	0	1	0	1	0	0	1	Article
48746138	Associations of economic and gender inequality with global obesity prevalence: Understanding the female excess	SOCIAL SCIENCE & MEDICINE	4	4	Green OA article	Green OA	4	McCoy-D	McCoy	David	Author	4	UCL-INST-CHILD-HLTH	UCL	UCL	University	University - Rank 001-025	University - Rank 001-025	University - Rank 001-025	1	0	0	0	0	1	0	0	0	0	0	0	0	0	1	0	0	0	0	0	0	1	0	1	0	Article
44854145	Associations of serious mental illness with earnings: results from the WHO World Mental Health surveys	BRITISH JOURNAL OF PSYCHIATRY	24	22	Green OA article	Green OA	24	Kessler-RC	Kessler	Ronald C.	Author, Reprint Author	1	HARVARD-UNIV	HARVARD-UNIV	HARVARD-UNIV	University	University - Rank 001-025	University - Rank 001-025	University - Rank 001-025	1	0	0	0	0	1	0	0	0	0	0	0	0	0	1	0	0	0	0	0	0	1	0	1	0	Article
47544943	Asthma programmes in diverse regions of the world: challenges, successes and lessons learnt	INTERNATIONAL JOURNAL OF TUBERCULOSIS AND LUNG DISEASE	16	15	Green OA article	Green OA	16	Zar-HJ	Zar	H. J.	Author	15	UNIV-CAPE-TOWN	UNIV-CAPE-TOWN	UNIV-CAPE-TOWN	University	University - Rank 101-200	University - Rank 101-200	University - Rank 101-200	1	0	0	0	0	1	0	0	0	0	0	0	0	0	0	0	0	1	0	0	0	1	0	0	1	Review
52370165	Attention to Local Health Burden and the Global Disparity of Health Research	PLOS ONE	3	6	Gold OA article (APC)	Gold OA	3	Ioannidis-JPA	Ioannidis	John P. A.	Author	4	STANFORD-UNIV	STANFORD-UNIV	STANFORD-UNIV	University	University - Rank 001-025	University - Rank 001-025	University - Rank 001-025	1	1495	0	1	0	0	0	0	0	0	0	0	0	0	1	0	0	0	0	0	0	1	1	1	0	Article
47531079	Avoiding the zero sum game in global cancer policy: Beyond 2011 UN high level summit	EUROPEAN JOURNAL OF CANCER	2	3	Toll access article	Toll access	2	Purushotham-AD	Purushotham	A. D.	Author	1	KINGS-COLL-LONDON	KINGS-COLL-LONDON	KINGS-COLL-LONDON	University	University - Rank 026-050	University - Rank 026-050	University - Rank 026-050	1	0	0	0	0	0	0	1	0	0	0	0	0	0	0	1	0	0	0	0	0	1	0	1	0	Article
49268024	Awareness of kidney diseases in general population and in high school students. Italian report for World Kidney Days 2010-2011	JOURNAL OF NEPHROLOGY	4	1	Green OA article	Green OA	4	Russo-D	Russo	D.	Author	1	UNIV-NAPLES-FEDERICO-II	UNIV-NAPLES-FEDERICO-II	UNIV-NAPLES-FEDERICO-II	University	University - Rank 201-500	University - Rank 201-500	University - Rank 201-500	1	0	0	0	0	1	0	0	0	0	0	0	0	0	0	0	0	0	1	0	0	1	0	0	1	Article
53249179	BRIDGING THE HEALTH SECURITY DIVIDE: DEPARTMENT OF DEFENSE SUPPORT FOR THE GLOBAL HEALTH SECURITY AGENDA	BIOSECURITY AND BIOTERRORISM-BIODEFENSE STRATEGY PRACTICE AND SCIENCE	6	5	Toll access article	Toll access	6	Jones-FR	Jones	Franca R.	Author, Reprint Author	3	US-DEPT-DEF	US-DEPT-DEF	US-DEPT-DEF	Government	Government	Government	Government	1	0	0	0	0	0	0	1	0	1	0	0	0	0	0	0	0	0	0	0	0	0	0	0	1	Article
52509106	Back to the future: what would the post-2015 global development goals look like if we replicated methods used to construct the Millennium Development Goals?	GLOBALIZATION AND HEALTH	4	1	Gold OA article (APC)	Gold OA	4	Hill-PS	Hill	Peter S.	Author	1	UNIV-QUEENSLAND	UNIV-QUEENSLAND	UNIV-QUEENSLAND	University	University - Rank 051-100	University - Rank 51-100	University - Rank 051-100	1	2145	0	1	0	0	0	0	0	0	0	0	0	0	0	0	1	0	0	0	0	1	1	0	1	Article
44650824	Backsliding Against Malnutrition	ASIA-PACIFIC JOURNAL OF PUBLIC HEALTH	3	1	Green OA article	Green OA	1	Harrison-GG	Harrison	Gail G.	Author, Reprint Author	1	UNIV-CALIF-LOS-ANGELES	UCLA	UCLA	University	University - Rank 001-025	University - Rank 001-025	University - Rank 001-025	1	0	0	0	0	1	0	0	0	0	0	0	0	0	1	0	0	0	0	0	0	1	0	1	0	Article
53496736	Bacterial Meningitis: A Density-Equalizing Mapping Analysis of the Global Research Architecture	INTERNATIONAL JOURNAL OF ENVIRONMENTAL RESEARCH AND PUBLIC HEALTH	7	3	Gold OA article (APC)	Gold OA	7	Groneberg-DA	Groneberg	David A.	Author, Reprint Author	3	GOETHE-UNIV-FRANKFURT	GOETHE-UNIV-FRANKFURT	GOETHE-UNIV-FRANKFURT	University	University - Rank 201-500	University - Rank 201-500	University - Rank 201-500	1	1650.72	0	1	0	0	0	0	0	0	0	0	0	0	0	0	0	0	1	0	0	1	1	0	1	Article
52631341	Barriers to mental health treatment: results from the WHO World Mental Health surveys	PSYCHOLOGICAL MEDICINE	31	33	Green OA article	Green OA	31	Kessler-RC	Kessler	R. C.	Author, Reprint Author	20	HARVARD-UNIV	HARVARD-UNIV	HARVARD-UNIV	University	University - Rank 001-025	University - Rank 001-025	University - Rank 001-025	1	0	0	0	0	1	0	0	0	0	0	0	0	0	1	0	0	0	0	0	0	1	0	1	0	Article
52825097	Beginning with sustainable scale up in mind: initial results from a population, health and environment project in East Africa	REPRODUCTIVE HEALTH MATTERS	8	8	Toll access article	Toll access	8	Fajansh-P	Fajansh	Peter	Author	8	PARTNERS-EXPANDING-HLTH-QUAL-&-ACCESS	PARTNERS-EXPANDING-HLTH-QUAL-&-ACCESS	PARTNERS-EXPANDING-HLTH-QUAL-&-ACCESS	Non-profit	Non-profit	Non-profit	Non-profit	1	0	0	0	0	0	0	1	0	0	0	1	0	0	0	0	0	0	0	0	0	0	0	0	1	Article
52015301	Between Individual Agency and Structure in HIV Prevention: Understanding the Middle Ground of Social Practice	AMERICAN JOURNAL OF PUBLIC HEALTH	4	5	Green OA article	Green OA	4	Aggleton-P	Aggleton	Peter	Author	5	UNIV-NEW-S-WALES	UNIV-NEW-S-WALES	UNIV-NEW-S-WALES	University	University - Rank 051-100	University - Rank 51-100	University - Rank 051-100	1	0	0	0	0	1	0	0	0	0	0	0	0	0	0	0	1	0	0	0	0	1	0	0	1	Article
48879430	Beyond Indicators: Advances in Global HIV Monitoring and Evaluation During the PEPFAR Era	JAIDS-JOURNAL OF ACQUIRED IMMUNE DEFICIENCY SYNDROMES	12	12	Green OA article	Green OA	12	Tulli-T	Tulli	Tuhuma	Author	5	FUTURES-GRP-INT	FUTURES-GRP-INT	FUTURES-GRP-INT	Company	Company	Company	Company	1	0	0	0	0	1	0	0	1	0	0	0	0	0	0	0	0	0	0	0	0	0	0	0	1	Article
50799153	Beyond procedural ethics: Foregrounding questions of justice in global health research ethics training for students	GLOBAL PUBLIC HEALTH	2	2	Green OA article	Green OA	2	Godard-B	Godard	Beatrice	Author	2	UNIV-MONTREAL	UNIV-MONTREAL	UNIV-MONTREAL	University	University - Rank 101-200	University - Rank 101-200	University - Rank 101-200	1	0	0	0	0	1	0	0	0	0	0	0	0	0	0	0	0	1	0	0	0	1	0	0	1	Article
51825312	Beyond the Bench and the Bedside: Economic and Health Systems Dimensions of Global Childhood Cancer Outcomes	PEDIATRIC BLOOD & CANCER	5	10	Toll access article	Toll access	5	Barr-RD	Barr	Ronald D.	Author	8	MCMASTER-UNIV	MCMASTER-UNIV	MCMASTER-UNIV	University	University - Rank 101-200	University - Rank 101-200	University - Rank 101-200	1	0	0	0	0	0	0	1	0	0	0	0	0	0	0	0	0	1	0	0	0	1	0	0	1	Article
44876047	Beyond the income inequality hypothesis and human health: a worldwide exploration	REVISTA DE SAUDE PUBLICA	3	3	Gold OA article (APC)	Gold OA	3	ManzanoPatino-AP	Manzano-Patino	Abigail P.	Author	3	UNIV-NACL-AUTONOMA-MEXICO	UNIV-NACL-AUTONOMA-MEXICO	UNIV-NACL-AUTONOMA-MEXICO	University	University - Rank 501+	University - Rank 501+	University - Rank 501+	1	697.5	0	1	0	0	0	0	0	0	0	0	0	0	0	0	0	0	0	1	0	1	1	0	1	Article
47427967	Big hopes for the children of the world: a review of the Millennium Development Goals	ANNALS OF TROPICAL PAEDIATRICS	3	2	Toll access article	Toll access	3	Fischer-PR	Fischer	P. R.	Author, Reprint Author	1	MAYO-CLIN	MAYO-CLIN	MAYO-CLIN	Hospital	University - Rank 001-025	University-Hospital	Hospital	1	0	0	0	0	0	0	1	0	0	1	0	0	0	0	0	0	0	0	0	0	0	0	0	1	Review
52114663	Body Mass Index and Mortality in Acutely Decompensated Heart Failure Across the World	JOURNAL OF THE AMERICAN COLLEGE OF CARDIOLOGY	20	17	Hybrid article	Hybrid	20	Mebazaa-A	Mebazaa	Alexandre	Author	9	UNIV-HELSINKI	UNIV-HELSINKI	UNIV-HELSINKI	University	University - Rank 051-100	University - Rank 51-100	University - Rank 051-100	1	3000	0	0	0	0	1	0	0	0	0	0	0	0	0	0	1	0	0	0	0	1	1	0	1	Article
47748761	Breast cancer in the world: Incidence and mortality	SALUD PUBLICA DE MEXICO	1	1	Gold OA article (non-APC)	Gold OA	1	Curado-MP	Curado	Maria Paula	Author, Reprint Author	1	INT-AGCY-RES-CANC	INT-AGCY-RES-CANC	INT-AGCY-RES-CANC	Research institute	Research Institute	Research Institute	Research Institute	1	0	0	0	1	0	0	0	0	0	0	0	1	0	0	0	0	0	0	0	0	0	0	0	1	Review
52412820	Breast cancer: trends in international incidence in men and women	BRITISH JOURNAL OF CANCER	4	3	Green OA article	Green OA	4	Yasui-Y	Yasui	Y.	Author	1	UNIV-ALBERTA	UNIV-ALBERTA	UNIV-ALBERTA	University	University - Rank 101-200	University - Rank 101-200	University - Rank 101-200	1	0	0	0	0	1	0	0	0	0	0	0	0	0	0	0	0	1	0	0	0	1	0	0	1	Article
47962700	Bridging the global health training gap: Design and evaluation of a new clinical global health course at Harvard Medical School	MEDICAL TEACHER	3	2	Hybrid article	Hybrid	3	Lee-PT	Lee	Patrick T.	Author	1	MASSACHUSETTS-GEN-HOSP	MASSACHUSETTS-GEN-HOSP	MASSACHUSETTS-GEN-HOSP	Hospital	University - Rank 001-025	University-Hospital	Hospital	1	2950	0	0	0	0	1	0	0	0	1	0	0	0	0	0	0	0	0	0	0	0	1	0	1	Article
50162653	Bringing evidence to policy to achieve health-related MDGs for all: justification and design of the EPI-4 project in China, India, Indonesia, and Vietnam	GLOBAL HEALTH ACTION	9	8	Gold OA article (APC)	Gold OA	9	Diwan-V	Diwan	Vinod	Author	1	KAROLINSKA-INST	KAROLINSKA-INST	KAROLINSKA-INST	University	University - Rank 026-050	University - Rank 026-050	University - Rank 026-050	1	1500	0	1	0	0	0	0	0	0	0	0	0	0	0	1	0	0	0	0	0	1	1	1	0	Article
52656183	Brucellosis: 'One Health' challenges and opportunities	REVUE SCIENTIFIQUE ET TECHNIQUE DE L OFFICE INTERNATIONAL DES EPIZOOTIES	3	4	Toll access article	Toll access	3	Buttke-D	Buttke	D.	Author	3	NATL-PK-SERV	NATL-PK-SERV	NATL-PK-SERV	Government	Government	Government	Government	1	0	0	0	0	0	0	1	0	1	0	0	0	0	0	0	0	0	0	0	0	0	0	0	1	Article
51085696	Building Evidence for Sustainability of Food and Nutrition Intervention Programs in Developing Countries	ADVANCES IN NUTRITION	5	3	Green OA article	Green OA	5	Sarriot-E	Sarriot	Eric	Author	3	ICF-INT	ICF-INT	ICF-INT	Company	Company	Company	Company	1	0	0	0	0	1	0	0	1	0	0	0	0	0	0	0	0	0	0	0	0	0	0	0	1	Article
46859583	Building a Global Health Education Network for Clinical Care and Research. The Benefits and Challenges of Distance Learning Tools. Lessons Learned from the Hopkins Center for Clinical Global Health Education	INFECTIOUS DISEASE CLINICS OF NORTH AMERICA	3	1	Green OA article	Green OA	3	Gupta-A	Gupta	Amita	Author	1	JOHNS-HOPKINS-UNIV	JOHNS-HOPKINS-UNIV	JOHNS-HOPKINS-UNIV	University	University - Rank 001-025	University - Rank 001-025	University - Rank 001-025	1	0	0	0	0	1	0	0	0	0	0	0	0	0	1	0	0	0	0	0	0	1	0	1	0	Article
52829318	Building capacity in a health sciences library to support global health projects	JOURNAL OF THE MEDICAL LIBRARY ASSOCIATION	3	1	Gold OA article (non-APC)	Gold OA	3	McGraw-KA	McGraw	Kathleen A.	Author	1	UNIV-N-CAROLINA	UNIV-N-CAROLINA	UNIV-N-CAROLINA	University	University - Rank 051-100	University - Rank 51-100	University - Rank 051-100	1	0	0	0	1	0	0	0	0	0	0	0	0	0	0	0	1	0	0	0	0	1	0	0	1	Article
48838752	Building global advocacy for nutrition: A review of the European and US landscapes	FOOD AND NUTRITION BULLETIN	3	2	Toll access article	Toll access	3	Sullivan-LM	Sullivan	Lucy Martinez	Author	2	COMMUNITY-COUNSELLING-SERV	COMMUNITY-COUNSELLING-SERV	COMMUNITY-COUNSELLING-SERV	Non-profit	Non-profit	Non-profit	Non-profit	1	0	0	0	0	0	0	1	0	0	0	1	0	0	0	0	0	0	0	0	0	0	0	0	1	Article
49879914	Building global capacity for patient safety: A training program for surgical safety research in developing and transitional countries	INTERNATIONAL JOURNAL OF SURGERY	7	2	Hybrid article	Hybrid	7	Sevdalis-N	Sevdalis	Nick	Author	1	UNIV-LONDON-IMPERIAL-COLL-SCI-TECHNOL-&-MED	UNIV-LONDON-IMPERIAL-COLL-SCI-TECHNOL-&-MED	UNIV-LONDON-IMPERIAL-COLL-SCI-TECHNOL-&-MED	University	University - Rank 001-025	University - Rank 001-025	University - Rank 001-025	1	3000	0	0	0	0	1	0	0	0	0	0	0	0	1	0	0	0	0	0	0	1	1	1	0	Article
51934469	Burden of Depressive Disorders by Country, Sex, Age, and Year: Findings from the Global Burden of Disease Study 2010	PLOS MEDICINE	8	5	Gold OA article (APC)	Gold OA	8	Whiteford-HA	Whiteford	Harvey A.	Author	1	UNIV-QUEENSLAND	UNIV-QUEENSLAND	UNIV-QUEENSLAND	University	University - Rank 051-100	University - Rank 51-100	University - Rank 051-100	1	2900	0	1	0	0	0	0	0	0	0	0	0	0	0	0	1	0	0	0	0	1	1	0	1	Article
47673149	Burden of anemia among indigenous populations	NUTRITION REVIEWS	3	6	Green OA article	Green OA	3	Zlotkin-SH	Zlotkin	Stanley H.	Author	4	UNIV-TORONTO	UNIV-TORONTO	UNIV-TORONTO	University	University - Rank 001-025	University - Rank 001-025	University - Rank 001-025	1	0	0	0	0	1	0	0	0	0	0	0	0	0	1	0	0	0	0	0	0	1	0	1	0	Review
52202148	Burden of migraine: international perspectives	NEUROLOGICAL SCIENCES	2	1	Green OA article	Green OA	2	Raggi-A	Raggi	A.	Author	1	NEUROL-INST-C-BESTA-IRCCS-FDN	NEUROL-INST-C-BESTA-IRCCS-FDN	NEUROL-INST-C-BESTA-IRCCS-FDN	Research institute	Research Institute	Research Institute	Research Institute	1	0	0	0	0	1	0	0	0	0	0	0	1	0	0	0	0	0	0	0	0	0	0	0	1	Article
51015140	Burden of tuberculosis in indigenous peoples globally: a systematic review	INTERNATIONAL JOURNAL OF TUBERCULOSIS AND LUNG DISEASE	6	5	Green OA article	Green OA	6	McCray-E	McCray	E.	Author	2	US-CTR-DIS-CONTROL-&-PREVENT	CDC	CDC	Government	Government	Government	Government	1	0	0	0	0	1	0	0	0	1	0	0	0	0	0	0	0	0	0	0	0	0	0	0	1	Review
53365358	Burden of typhoid fever in low-income and middle-income countries: a systematic, literature-based update with risk-factor adjustment	LANCET GLOBAL HEALTH	9	1	Gold OA article (APC)	Gold OA	9	Wierzba-TF	Wierzba	Thomas F.	Author	1	INT-VACCINE-INST	INT-VACCINE-INST	INT-VACCINE-INST	Non-profit	Non-profit	Non-profit	Non-profit	1	5000	0	1	0	0	0	0	0	0	0	1	0	0	0	0	0	0	0	0	0	0	1	0	1	Article
53159449	CAREER PATHS AND PRACTICE PATTERNS OF GLOBAL EMERGENCY MEDICINE PHYSICIANS: A CROSS-SECTIONAL SURVEY	JOURNAL OF EMERGENCY MEDICINE	4	5	Toll access article	Toll access	4	Martin-IBK	Martin	Ian B. K.	Author	4	UNIV-N-CAROLINA	UNIV-N-CAROLINA	UNIV-N-CAROLINA	University	University - Rank 051-100	University - Rank 51-100	University - Rank 051-100	1	0	0	0	0	0	0	1	0	0	0	0	0	0	0	0	1	0	0	0	0	1	0	0	1	Article
52329927	CDC Grand Rounds: Global Tobacco Control	MMWR-MORBIDITY AND MORTALITY WEEKLY REPORT	7	4	Gold OA article (non-APC)	Gold OA	7	Iskander-J	Iskander	John	Author, Reprint Author	4	CDC	CDC	CDC	Government	Government	Government	Government	1	0	0	0	1	0	0	0	0	1	0	0	0	0	0	0	0	0	0	0	0	0	0	0	1	Article
52889374	CHALLENGING THE MYTH OF AN "EPIDEMIC" OF COMMON MENTAL DISORDERS: TRENDS IN THE GLOBAL PREVALENCE OF ANXIETY AND DEPRESSION BETWEEN 1990 AND 2010	DEPRESSION AND ANXIETY	6	5	Toll access article	Toll access	6	Whiteford-HA	Whiteford	Harvey A.	Author	1	UNIV-QUEENSLAND	UNIV-QUEENSLAND	UNIV-QUEENSLAND	University	University - Rank 051-100	University - Rank 51-100	University - Rank 051-100	1	0	0	0	0	0	0	1	0	0	0	0	0	0	0	0	1	0	0	0	0	1	0	0	1	Article
46914452	Can a Low-Resource-Use Blood Pressure Device Impact on Global Maternal Mortality?	HYPERTENSION IN PREGNANCY	4	1	Toll access article	Toll access	4	Shennan-A	Shennan	Andrew	Author, Reprint Author	1	KINGS-COLL-LONDON	KINGS-COLL-LONDON	KINGS-COLL-LONDON	University	University - Rank 026-050	University - Rank 026-050	University - Rank 026-050	1	0	0	0	0	0	0	1	0	0	0	0	0	0	0	1	0	0	0	0	0	1	0	1	0	Review
44123924	Can the Millennium Development Goals database be used to measure the effects of globalisation on women's health in Sub-Saharan Africa? A critical analysis	SCANDINAVIAN JOURNAL OF PUBLIC HEALTH	4	4	Green OA article	Green OA	4	Loewenson-R	Loewenson	Rene	Author	4	TARSC	TARSC	TARSC	Non-profit	Non-profit	Non-profit	Non-profit	1	0	0	0	0	1	0	0	0	0	0	1	0	0	0	0	0	0	0	0	0	0	0	0	1	Article
49129359	Cancer Prevention for Global Health: A Report from the ASPO International Cancer Prevention Interest Group	CANCER EPIDEMIOLOGY BIOMARKERS & PREVENTION	4	4	Delayed OA article	Delayed OA	4	Meyskens-F	Meyskens	Frank	Author	4	UNIV-CALIF-IRVINE	UNIV-CALIF-IRVINE	UNIV-CALIF-IRVINE	University	University - Rank 051-100	University - Rank 51-100	University - Rank 051-100	1	0	1	0	0	0	0	0	0	0	0	0	0	0	0	0	1	0	0	0	0	1	0	0	1	Review
47769154	Cardiometabolic risk variables in overweight and obese children: a worldwide comparison	CARDIOVASCULAR DIABETOLOGY	6	5	Gold OA article (APC)	Gold OA	6	Diamant-M	Diamant	Michaela	Author	4	VRIJE-UNIV-AMSTERDAM	VRIJE-UNIV-AMSTERDAM	VRIJE-UNIV-AMSTERDAM	University	University - Rank 101-200	University - Rank 101-200	University - Rank 101-200	1	2410	0	1	0	0	0	0	0	0	0	0	0	0	0	0	0	1	0	0	0	1	1	0	1	Review
49635771	Care of the injured worldwide: trauma still the neglected disease of modern society	SCANDINAVIAN JOURNAL OF TRAUMA RESUSCITATION & EMERGENCY MEDICINE	4	4	Gold OA article (APC)	Gold OA	4	McCunn-M	McCunn	Maureen	Author	4	HOSP-UNIV-PENN	UNIV-PENN	HOSP-UNIV-PENN	Hospital	University - Rank 001-025	University-Hospital	Hospital	1	2325	0	1	0	0	0	0	0	0	1	0	0	0	0	0	0	0	0	0	0	0	1	0	1	Review
47125709	Career Development Needs Assessment in Cancer Prevention and Control: Focus on Research in Minority and International Settings	JOURNAL OF CANCER EDUCATION	5	3	Green OA article	Green OA	5	Chamberlain-RM	Chamberlain	Robert M.	Author	1	UNIV-MICHIGAN	UNIV-MICHIGAN	UNIV-MICHIGAN	University	University - Rank 001-025	University - Rank 001-025	University - Rank 001-025	1	0	0	0	0	1	0	0	0	0	0	0	0	0	1	0	0	0	0	0	0	1	0	1	0	Article
48894448	Case study methodology in nurse migration research: An integrative review	APPLIED NURSING RESEARCH	5	4	Toll access article	Toll access	5	AkhtarDanesh-N	Akhtar-Danesh	Noori	Author	1	MCMASTER-UNIV	MCMASTER-UNIV	MCMASTER-UNIV	University	University - Rank 101-200	University - Rank 101-200	University - Rank 101-200	1	0	0	0	0	0	0	1	0	0	0	0	0	0	0	0	0	1	0	0	0	1	0	0	1	Review
52606402	Causes of vision loss worldwide, 1990-2010: a systematic analysis	LANCET GLOBAL HEALTH	13	13	Gold OA article (APC)	Gold OA	13	Taylor-HR	Taylor	Hugh R.	Author	13	UNIV-MELBOURNE	UNIV-MELBOURNE	UNIV-MELBOURNE	University	University - Rank 026-050	University - Rank 026-050	University - Rank 026-050	1	5000	0	1	0	0	0	0	0	0	0	0	0	0	0	1	0	0	0	0	0	1	1	1	0	Article
48038933	Cavitating pulmonary tuberculosis: a global challenge	CLINICAL MEDICINE	1	2	Toll access article	Toll access	1	Saeed-W	Saeed	Waseem	Author, Reprint Author	1	MIL-HOSP	MIL-HOSP	MIL-HOSP	Hospital	Hospital	Hospital	Hospital	1	0	0	0	0	0	0	1	0	0	1	0	0	0	0	0	0	0	0	0	0	0	0	0	1	Article
44625227	Chagas disease: a new worldwide challenge	NATURE	2	3	Green OA article	Green OA	2	Vinas-PA	Vinas	Pedro Albajar	Author	3	WHO	WHO	WHO	Non-profit	Non-profit	Non-profit	Non-profit	1	0	0	0	0	1	0	0	0	0	0	1	0	0	0	0	0	0	0	0	0	0	0	0	1	Article
48113698	Challenges and Opportunities for Occupational Health Nurses in Asia	WORKPLACE HEALTH & SAFETY	4	4	Toll access article	Toll access	4	June-KJ	June	Kyung Ja	Author	4	SOONCHUNHYANG-UNIV	SOONCHUNHYANG-UNIV	SOONCHUNHYANG-UNIV	University	University: Unranked	University: Unranked	University: Unranked	1	0	0	0	0	0	0	1	0	0	0	0	0	0	0	0	0	0	0	0	1	1	0	0	1	Article
52640689	Challenges faced by multidisplinary new investigators on addressing grand challenges in global health	GLOBALIZATION AND HEALTH	4	12	Gold OA article (APC)	Gold OA	4	RamonGarcia-S	Ramon-Garcia	Santiago	Author	8	UNIV-BRITISH-COLUMBIA	UNIV-BRITISH-COLUMBIA	UNIV-BRITISH-COLUMBIA	University	University - Rank 026-050	University - Rank 026-050	University - Rank 026-050	1	2145	0	1	0	0	0	0	0	0	0	0	0	0	0	1	0	0	0	0	0	1	1	1	0	Article
51916560	Challenges in Developing a Community-Based Program for Maltreated Children and Adolescents in Brazil	PSYCHIATRIC SERVICES	4	2	Toll access article	Toll access	4	Rosenheck-RA	Rosenheck	Robert A.	Author	2	YALE-UNIV	YALE-UNIV	YALE-UNIV	University	University - Rank 001-025	University - Rank 001-025	University - Rank 001-025	1	0	0	0	0	0	0	1	0	0	0	0	0	0	1	0	0	0	0	0	0	1	0	1	0	Article
48725320	Challenges in International Medicine: Ethical Dilemmas, Unanticipated Consequences, and Accepting Limitations	ACADEMIC EMERGENCY MEDICINE	3	5	Hybrid article	Hybrid	3	Holliman-CJ	Holliman	C. James	Author	5	GEORGE-WASHINGTON-UNIV	GEORGE-WASHINGTON-UNIV	GEORGE-WASHINGTON-UNIV	University	University - Rank 201-500	University - Rank 201-500	University - Rank 201-500	1	3000	0	0	0	0	1	0	0	0	0	0	0	0	0	0	0	0	1	0	0	1	1	0	1	Article
46798187	Challenges of global surveillance during an influenza pandemic	PUBLIC HEALTH	3	1	Green OA article	Green OA	3	Chamberland-M	Chamberland	M.	Author	1	WHO	WHO	WHO	Non-profit	Non-profit	Non-profit	Non-profit	1	0	0	0	0	1	0	0	0	0	0	1	0	0	0	0	0	0	0	0	0	0	0	0	1	Review
52772156	Changing Patterns of HIV Epidemic in 30 Years in East Asia	CURRENT HIV/AIDS REPORTS	7	1	Toll access article	Toll access	7	Kihara-M	Kihara	Masahiro	Author	1	KYOTO-UNIV	KYOTO-UNIV	KYOTO-UNIV	University	University - Rank 051-100	University - Rank 51-100	University - Rank 051-100	1	0	0	0	0	0	0	1	0	0	0	0	0	0	0	0	1	0	0	0	0	1	0	0	1	Article
48980315	Changing care and prevention needs for global public health: In pursuit of a comprehensive perspective	GLOBAL PUBLIC HEALTH	2	2	Toll access article	Toll access	2	Mendoza-W	Mendoza	Walter	Author	2	PERU-COUNTRY-OFF	PERU-COUNTRY-OFF	PERU-COUNTRY-OFF	Government	Government	Government	Government	1	0	0	0	0	0	0	1	0	1	0	0	0	0	0	0	0	0	0	0	0	0	0	0	1	Article
49930688	Changing practice: Implications of the World Report on Disability for responding to communication disability in under-served populations	INTERNATIONAL JOURNAL OF SPEECH-LANGUAGE PATHOLOGY	4	3	Toll access article	Toll access	4	Marshall-J	Marshall	Julie	Author	3	MANCHESTER-METROPOLITAN-UNIV	MANCHESTER-METROPOLITAN-UNIV	MANCHESTER-METROPOLITAN-UNIV	University	University - Rank 501+	University - Rank 501+	University - Rank 501+	1	0	0	0	0	0	0	1	0	0	0	0	0	0	0	0	0	0	0	1	0	1	0	0	1	Article
53054053	Characteristics of International Assaultive Psychiatric Patients: Review of Published Findings, 2000-2012	PSYCHIATRIC QUARTERLY	4	4	Toll access article	Toll access	4	Flannery-GJ	Flannery	Georgina J.	Author	4	NEWTON-FREE-LIB	NEWTON-FREE-LIB	NEWTON-FREE-LIB	Non-profit	Non-profit	Non-profit	Non-profit	1	0	0	0	0	0	0	1	0	0	0	1	0	0	0	0	0	0	0	0	0	0	0	0	1	Article
45957729	Characteristics of insomnia in a primary care setting: EQUINOX survey of 5293 insomniacs from 10 countries	SLEEP MEDICINE	5	5	Toll access article	Toll access	5	Hedner-J	Hedner	Jan	Author	5	SAHLGRENS-UNIV-HOSP	SAHLGRENS-UNIV-HOSP	SAHLGRENS-UNIV-HOSP	Hospital	University - Rank 101-200	University-Hospital	Hospital	1	0	0	0	0	0	0	1	0	0	1	0	0	0	0	0	0	0	0	0	0	0	0	0	1	Article
46625701	Characterization of Global Patterns and the Genetics of Fusidic Acid Resistance	CLINICAL INFECTIOUS DISEASES	3	3	Hybrid article	Hybrid	3	Chopra-I	Chopra	Ian	Author	2	UNIV-LEEDS	UNIV-LEEDS	UNIV-LEEDS	University	University - Rank 101-200	University - Rank 101-200	University - Rank 101-200	1	3500	0	0	0	0	1	0	0	0	0	0	0	0	0	0	0	1	0	0	0	1	1	0	1	Article
50295426	Characterizing the Global Burden of Surgical Disease: A Method to Estimate Inguinal Hernia Epidemiology in Ghana	WORLD JOURNAL OF SURGERY	5	2	Green OA article	Green OA	5	Harris-HW	Harris	Hobart W.	Author	1	UNIV-CALIF-SAN-FRANCISCO	UCSF	UCSF	University	University - Rank 001-025	University - Rank 001-025	University - Rank 001-025	1	0	0	0	0	1	0	0	0	0	0	0	0	0	1	0	0	0	0	0	0	1	0	1	0	Article
49506289	Charting the way forward to better quality health care: how do we get there and what are the next steps? Recommendations from the Salzburg Global Seminar on making health care better in low- and middle-income economies	INTERNATIONAL JOURNAL FOR QUALITY IN HEALTH CARE	9	8	Hybrid article	Hybrid	9	Lotherington-J	Lotherington	John	Author	8	SALZBURG-GLOBAL-SEMINAR	SALZBURG-GLOBAL-SEMINAR	SALZBURG-GLOBAL-SEMINAR	Non-profit	Non-profit	Non-profit	Non-profit	1	2800	0	0	0	0	1	0	0	0	0	1	0	0	0	0	0	0	0	0	0	0	1	0	1	Article
50349257	Childhood Pneumonia and Diarrhoea 1 Global burden of childhood pneumonia and diarrhoea	LANCET	9	5	Toll access article	Toll access	9	Black-RE	Black	Robert E.	Author, Reprint Author	1	JOHNS-HOPKINS-BLOOMBERG-SCH-PUBL-HLTH	JOHNS-HOPKINS-UNIV	JOHNS-HOPKINS-UNIV	University	University - Rank 001-025	University - Rank 001-025	University - Rank 001-025	1	0	0	0	0	0	0	1	0	0	0	0	0	0	1	0	0	0	0	0	0	1	0	1	0	Article
53151801	China's distinctive engagement in global health	LANCET	6	7	Toll access article	Toll access	6	Chen-L	Chen	Lincoln	Author	7	CHINA-MED-BOARD	CHINA-MED-BOARD	CHINA-MED-BOARD	Government	Government	Government	Government	1	0	0	0	0	0	0	1	0	1	0	0	0	0	0	0	0	0	0	0	0	0	0	0	1	Review
51888824	China's position in negotiating the Framework Convention on Tobacco Control and the revised International Health Regulations	PUBLIC HEALTH	1	2	Toll access article	Toll access	1	Huang-Y	Huang	Y.	Author, Reprint Author	1	SETON-HALL-UNIV	SETON-HALL-UNIV	SETON-HALL-UNIV	University	University: Unranked	University: Unranked	University: Unranked	1	0	0	0	0	0	0	1	0	0	0	0	0	0	0	0	0	0	0	0	1	1	0	0	1	Article
53921507	China's role as a global health donor in Africa: what can we learn from studying under reported resource flows?	GLOBALIZATION AND HEALTH	4	5	Gold OA article (APC)	Gold OA	4	Chen-L	Chen	Lucy	Author	5	PEKING-UNIV	PEKING-UNIV	PEKING-UNIV	University	University - Rank 026-050	University - Rank 026-050	University - Rank 026-050	1	2145	0	1	0	0	0	0	0	0	0	0	0	0	0	1	0	0	0	0	0	1	1	1	0	Article
45275163	Chronic Diseases: Chronic Diseases and Development 1 Raising the priority of preventing chronic diseases: a political process	LANCET	11	12	Toll access article	Toll access	11	Beaglehole-R	Beaglehole	Robert	Author	12	UNIV-AUCKLAND	UNIV-AUCKLAND	UNIV-AUCKLAND	University	University - Rank 101-200	University - Rank 101-200	University - Rank 101-200	1	0	0	0	0	0	0	1	0	0	0	0	0	0	0	0	0	1	0	0	0	1	0	0	1	Article
52543726	Chronic Kidney Disease and the Aging Population World Kidney Day 2014	TRANSPLANTATION	2	2	Green OA article	Green OA	2	Riella-M	Riella	Miguel	Author	2	CATHOLIC-UNIV-PARANA	CATHOLIC-UNIV-PARANA	CATHOLIC-UNIV-PARANA	University	University - Rank 501+	University - Rank 501+	University - Rank 501+	1	0	0	0	0	1	0	0	0	0	0	0	0	0	0	0	0	0	0	1	0	1	0	0	1	Article
48886819	Chronic Obstructive Pulmonary Disease: A Worldwide Problem	MEDICAL CLINICS OF NORTH AMERICA	2	2	Toll access article	Toll access	2	Lamprecht-B	Lamprecht	Bernd	Author	2	PARACELSUS-PRIVATE-MED-UNIV-SALZBURG	PARACELSUS-PRIVATE-MED-UNIV-SALZBURG	PARACELSUS-PRIVATE-MED-UNIV-SALZBURG	University	University: Unranked	University: Unranked	University: Unranked	1	0	0	0	0	0	0	1	0	0	0	0	0	0	0	0	0	0	0	0	1	1	0	0	1	Article
47087302	Chronic and non-communicable diseases: a critical challenge for nurses globally	INTERNATIONAL NURSING REVIEW	3	2	Toll access article	Toll access	3	Hughes-P	Hughes	P.	Author, Reprint Author	1	C3-COLLABORATING-HLTH	C3-COLLABORATING-HLTH	C3-COLLABORATING-HLTH	Non-profit	Non-profit	Non-profit	Non-profit	1	0	0	0	0	0	0	1	0	0	0	1	0	0	0	0	0	0	0	0	0	0	0	0	1	Article
49464537	Chronic non-communicable diseases: a global epidemic of the 21st century	LAEKNABLADID	2	2	Toll access article	Toll access	2	Gudnason-V	Gudnason		Author	2	UNIV-ICELAND	UNIV-ICELAND	UNIV-ICELAND	University	University - Rank 201-500	University - Rank 201-500	University - Rank 201-500	1	0	0	0	0	0	0	1	0	0	0	0	0	0	0	0	0	0	1	0	0	1	0	0	1	Article
46056955	Climate Change, Vector-borne Disease and Interdisciplinary Research: Social Science Perspectives on an Environment and Health Controversy	ECOHEALTH	2	2	Toll access article	Toll access	2	Ali-SH	Ali	S. Harris	Author	2	YORK-UNIV	YORK-UNIV	YORK-UNIV	University	University - Rank 201-500	University - Rank 201-500	University - Rank 201-500	1	0	0	0	0	0	0	1	0	0	0	0	0	0	0	0	0	0	1	0	0	1	0	0	1	Article
49505696	Climate change adaptation: Where does global health fit in the agenda?	GLOBALIZATION AND HEALTH	2	1	Gold OA article (APC)	Gold OA	2	Friel-S	Friel	Sharon	Author	1	UNIV-MELBOURNE	UNIV-MELBOURNE	UNIV-MELBOURNE	University	University - Rank 026-050	University - Rank 026-050	University - Rank 026-050	1	2145	0	1	0	0	0	0	0	0	0	0	0	0	0	1	0	0	0	0	0	1	1	1	0	Review
52697381	Climate change and respiratory health: current evidence and knowledge gaps	EXPERT REVIEW OF RESPIRATORY MEDICINE	3	6	Green OA article	Green OA	3	Balmes-JR	Balmes	John R.	Author, Reprint Author	5	UNIV-CALIF-SAN-FRANCISCO	UCSF	UCSF	University	University - Rank 001-025	University - Rank 001-025	University - Rank 001-025	1	0	0	0	0	1	0	0	0	0	0	0	0	0	1	0	0	0	0	0	0	1	0	1	0	Article
44464862	Climate change and the global malaria recession	NATURE	6	6	Green OA article	Green OA	6	Hay-SI	Hay	Simon I.	Author, Reprint Author	1	UNIV-OXFORD	UNIV-OXFORD	UNIV-OXFORD	University	University - Rank 001-025	University - Rank 001-025	University - Rank 001-025	1	0	0	0	0	1	0	0	0	0	0	0	0	0	1	0	0	0	0	0	0	1	0	1	0	Article
44304892	Clinical Management of Pandemic 2009 Influenza A(H1N1) Infection	CHEST	3	3	Green OA article	Green OA	3	Chan-PKS	Chan	Paul K. S.	Author	2	CHINESE-UNIV-HONG-KONG	CHINESE-UNIV-HONG-KONG	CHINESE-UNIV-HONG-KONG	University	University - Rank 051-100	University - Rank 51-100	University - Rank 051-100	1	0	0	0	0	1	0	0	0	0	0	0	0	0	0	0	1	0	0	0	0	1	0	0	1	Article
51599037	Clinical and Translational Research in Global Health and Emergency Care: A Research Agenda	ACADEMIC EMERGENCY MEDICINE	9	8	Hybrid article	Hybrid	9	Douglass-K	Douglass	Katherine	Author	4	GEORGE-WASHINGTON-UNIV	GEORGE-WASHINGTON-UNIV	GEORGE-WASHINGTON-UNIV	University	University - Rank 201-500	University - Rank 201-500	University - Rank 201-500	1	3000	0	0	0	0	1	0	0	0	0	0	0	0	0	0	0	0	1	0	0	1	1	0	1	Article
50669095	Clinical outcomes and safety with trabectedin therapy in patients with advanced soft tissue sarcomas following failure of prior chemotherapy: results of a worldwide expanded access program study	ANNALS OF ONCOLOGY	10	11	Hybrid article	Hybrid	10	Demetri-GD	Demetri	G. D.	Author	10	HARVARD-CANC-CTR	HARVARD-UNIV	HARVARD-MED-SCH	Hospital	University - Rank 001-025	University-Hospital	Hospital	1	3500	0	0	0	0	1	0	0	0	1	0	0	0	0	0	0	0	0	0	0	0	1	0	1	Article
46511137	Clinical research and global health: Mentoring the next generation of health care students	GLOBAL PUBLIC HEALTH	5	7	Green OA article	Green OA	5	Zunt-JR	Zunt	Joseph R.	Author, Reprint Author	1	UNIV-WASHINGTON	UNIV-WASHINGTON	UNIV-WASHINGTON	University	University - Rank 026-050	University - Rank 026-050	University - Rank 026-050	1	0	0	0	0	1	0	0	0	0	0	0	0	0	0	1	0	0	0	0	0	1	0	1	0	Article
52804412	Cohort Profile: Understanding socioeconomic inequalities in health and health behaviours: The GLOBE study	INTERNATIONAL JOURNAL OF EPIDEMIOLOGY	7	1	Hybrid article	Hybrid	7	Mackenbach-JP	Mackenbach	Johan P.	Author	1	ERASMUS-MC	ERASMUS-UNIV	ERASMUS-MC-UNIV-MED-CTR	Hospital	University - Rank 051-100	University-Hospital	Hospital	1	3200	0	0	0	0	1	0	0	0	1	0	0	0	0	0	0	0	0	0	0	0	1	0	1	Article
48182240	Cohort studies around the world: Methodologies, research questions and integration to address the emerging global epidemic of chronic diseases	PUBLIC HEALTH	5	7	Toll access article	Toll access	5	Spiegelman-D	Spiegelman	D.	Author, Reprint Author	1	HARVARD-UNIV	HARVARD-UNIV	HARVARD-UNIV	University	University - Rank 001-025	University - Rank 001-025	University - Rank 001-025	1	0	0	0	0	0	0	1	0	0	0	0	0	0	1	0	0	0	0	0	0	1	0	1	0	Article
49930696	Collaborations to address barriers for people with communication disabilities in Ghana: Considering the World Report on Disability	INTERNATIONAL JOURNAL OF SPEECH-LANGUAGE PATHOLOGY	9	5	Green OA article	Green OA	9	Laing-A	Laing	Anthony	Author	5	UNIV-GHANA	UNIV-GHANA	UNIV-GHANA	University	University - Rank 501+	University - Rank 501+	University - Rank 501+	1	0	0	0	0	1	0	0	0	0	0	0	0	0	0	0	0	0	0	1	0	1	0	0	1	Article
44355369	Colorectal Cancer: National and International Perspective on the Burden of Disease and Public Health Impact	GASTROENTEROLOGY	2	2	Toll access article	Toll access	1	Gellad-ZF	Gellad	Ziad F.	Author, Reprint Author	1	DUKE-UNIV	DUKE-UNIV	DUKE-UNIV	University	University - Rank 001-025	University - Rank 001-025	University - Rank 001-025	1	0	0	0	0	0	0	1	0	0	0	0	0	0	1	0	0	0	0	0	0	1	0	1	0	Article
49678138	Combined Exposures: An update from the International comission on biological effects of noise	NOISE & HEALTH	2	2	Gold OA article (non-APC)	Gold OA	2	Klaeboe-R	Klaeboe	Ronny	Author	2	TRANSPORTOKONOMISK-INST	TRANSPORTOKONOMISK-INST	TRANSPORTOKONOMISK-INST	Non-profit	Non-profit	Non-profit	Non-profit	1	0	0	0	1	0	0	0	0	0	0	1	0	0	0	0	0	0	0	0	0	0	0	0	1	Article
52061702	Combustion By-Products and Their Health Effects-Combustion Engineering and Global Health in the 21st Century: Issues and Challenges	INTERNATIONAL JOURNAL OF TOXICOLOGY	10	9	Green OA article	Green OA	10	Cormier-SA	Cormier	Stephania A.	Author, Reprint Author	8	UNIV-TENNESSEE	UNIV-TENNESSEE	UNIV-TENNESSEE	University	University - Rank 201-500	University - Rank 201-500	University - Rank 201-500	1	0	0	0	0	1	0	0	0	0	0	0	0	0	0	0	0	0	1	0	0	1	0	0	1	Review
48418466	Communication strategies to help reduce the prevalence of non-communicable diseases: Proceedings from the inaugural IFIC Foundation Global Diet and Physical Activity Communications Summit	NUTRITION REVIEWS	4	2	Green OA article	Green OA	4	Dooher-CC	Dooher	Carrie C.	Author	1	INT-FOOD-INFORMAT-COUNCIL-FDN	INT-FOOD-INFORMAT-COUNCIL-FDN	INT-FOOD-INFORMAT-COUNCIL-FDN	Non-profit	Non-profit	Non-profit	Non-profit	1	0	0	0	0	1	0	0	0	0	0	1	0	0	0	0	0	0	0	0	0	0	0	0	1	Review
46741488	Community Health Workers in Global Health: Scale and Scalability	MOUNT SINAI JOURNAL OF MEDICINE	5	3	Green OA article	Green OA	5	Singh-P	Singh	Prabhjot	Author, Reprint Author	1	COLUMBIA-UNIV	COLUMBIA-UNIV	COLUMBIA-UNIV	University	University - Rank 001-025	University - Rank 001-025	University - Rank 001-025	1	0	0	0	0	1	0	0	0	0	0	0	0	0	1	0	0	0	0	0	0	1	0	1	0	Article
52583744	Community Health Workers in Low-, Middle-, and High-Income Countries: An Overview of Their History, Recent Evolution, and Current Effectiveness	Annual Review of Public Health	3	3	Toll access article	Toll access	3	Rogers-MM	Rogers	Michael M.	Author	3	JOHNS-HOPKINS-MED	JOHNS-HOPKINS-UNIV	JOHNS-HOPKINS-UNIV	University	University - Rank 001-025	University - Rank 001-025	University - Rank 001-025	1	0	0	0	0	0	0	1	0	0	0	0	0	0	1	0	0	0	0	0	0	1	0	1	0	Review
48189218	Community case management of childhood illnesses: policy and implementation in Countdown to 2015 countries	BULLETIN OF THE WORLD HEALTH ORGANIZATION	5	4	Gold OA article (non-APC)	Gold OA	5	Hamer-DH	Hamer	Davidson H.	Author	4	BOSTON-UNIV	BOSTON-UNIV	BOSTON-UNIV	University	University - Rank 051-100	University - Rank 51-100	University - Rank 051-100	1	0	0	0	1	0	0	0	0	0	0	0	0	0	0	0	1	0	0	0	0	1	0	0	1	Article
51453132	Community health workers for universal health-care coverage: from fragmentation to synergy	BULLETIN OF THE WORLD HEALTH ORGANIZATION	10	8	Gold OA article (non-APC)	Gold OA	10	Zodpey-S	Zodpey	Sanjay	Author	8	PUBL-HLTH-FDN-INDIA	PUBL-HLTH-FDN-INDIA	PUBL-HLTH-FDN-INDIA	Non-profit	Non-profit	Non-profit	Non-profit	1	0	0	0	1	0	0	0	0	0	0	1	0	0	0	0	0	0	0	0	0	0	0	0	1	Article
53543590	Community participation in formulating the post-2015 health and development goal agenda: reflections of a multi-country research collaboration	INTERNATIONAL JOURNAL FOR EQUITY IN HEALTH	8	8	Gold OA article (APC)	Gold OA	8	Hill-PS	Hill	Peter S.	Author	1	UNIV-QUEENSLAND	UNIV-QUEENSLAND	UNIV-QUEENSLAND	University	University - Rank 051-100	University - Rank 51-100	University - Rank 051-100	1	2220	0	1	0	0	0	0	0	0	0	0	0	0	0	0	1	0	0	0	0	1	1	0	1	Article
44350076	Community-acquired pneumonia in HIV-infected children: a global perspective	CURRENT OPINION IN PULMONARY MEDICINE	2	1	Toll access article	Toll access	2	Zar-HJ	Zar	H. J.	Author	1	UNIV-CAPE-TOWN	UNIV-CAPE-TOWN	UNIV-CAPE-TOWN	University	University - Rank 101-200	University - Rank 101-200	University - Rank 101-200	1	0	0	0	0	0	0	1	0	0	0	0	0	0	0	0	0	1	0	0	0	1	0	0	1	Article
48958120	Community-level correlates of intimate partner violence against women globally: A systematic review	SOCIAL SCIENCE & MEDICINE	4	3	Green OA article	Green OA	4	Sibley-LM	Sibley	Lynn M.	Author	1	EMORY-UNIV	EMORY-UNIV	EMORY-UNIV	University	University - Rank 051-100	University - Rank 51-100	University - Rank 051-100	1	0	0	0	0	1	0	0	0	0	0	0	0	0	0	0	1	0	0	0	0	1	0	0	1	Review
47288733	Competencies for Global Heath Graduate Education	INFECTIOUS DISEASE CLINICS OF NORTH AMERICA	3	3	Green OA article	Green OA	3	Buekens-P	Buekens	Pierre	Author	3	TULANE-UNIV	TULANE-UNIV	TULANE-UNIV	University	University - Rank 201-500	University - Rank 201-500	University - Rank 201-500	1	0	0	0	0	1	0	0	0	0	0	0	0	0	0	0	0	0	1	0	0	1	0	0	1	Article
49718885	Competency-Based Curricula to Transform Global Health: Redesign With the End in Mind	ACADEMIC MEDICINE	6	3	Toll access article	Toll access	5	Hagopian-A	Hagopian	Amy	Author	1	UNIV-WASHINGTON	UNIV-WASHINGTON	UNIV-WASHINGTON	University	University - Rank 026-050	University - Rank 026-050	University - Rank 026-050	1	0	0	0	0	0	0	1	0	0	0	0	0	0	0	1	0	0	0	0	0	1	0	1	0	Article
53005558	Complementary feeding and attained linear growth among 6-23-month-old children	PUBLIC HEALTH NUTRITION	5	2	Green OA article	Green OA	5	Garza-C	Garza	Cutberto	Author	2	BOSTON-COLL	BOSTON-COLL	BOSTON-COLL	University	University - Rank 201-500	University - Rank 201-500	University - Rank 201-500	1	0	0	0	0	1	0	0	0	0	0	0	0	0	0	0	0	0	1	0	0	1	0	0	1	Article
53656250	Compliance with infection prevention and control in oral health-care facilities: a global perspective	INTERNATIONAL DENTAL JOURNAL	3	2	Green OA article	Green OA	3	Fossey-A	Fossey	Annabel	Author	1	CENT-UNIV-TECHNOL	CENT-UNIV-TECHNOL	CENT-UNIV-TECHNOL	University	University: Unranked	University: Unranked	University: Unranked	1	0	0	0	0	1	0	0	0	0	0	0	0	0	0	0	0	0	0	0	1	1	0	0	1	Review
44546352	Compulsory service programmes for recruiting health workers in remote and rural areas: do they work?	BULLETIN OF THE WORLD HEALTH ORGANIZATION	4	1	Gold OA article (non-APC)	Gold OA	4	Ross-H	Ross	Heather	Author	1	GEORGE-WASHINGTON-UNIV	GEORGE-WASHINGTON-UNIV	GEORGE-WASHINGTON-UNIV	University	University - Rank 201-500	University - Rank 201-500	University - Rank 201-500	1	0	0	0	1	0	0	0	0	0	0	0	0	0	0	0	0	0	1	0	0	1	0	0	1	Article
53552736	Conceptual Framework and Research Methods for Migration and HIV Transmission Dynamics	AIDS AND BEHAVIOR	3	2	Green OA article	Green OA	3	Khanna-AS	Khanna	Aditya S.	Author	2	UNIV-WASHINGTON	UNIV-WASHINGTON	UNIV-WASHINGTON	University	University - Rank 026-050	University - Rank 026-050	University - Rank 026-050	1	0	0	0	0	1	0	0	0	0	0	0	0	0	0	1	0	0	0	0	0	1	0	1	0	Article
46099169	Conceptual Model for Partnership and Sustainability in Global Health	PUBLIC HEALTH NURSING	2	2	Toll access article	Toll access	2	Mitchell-E	Mitchell	Emma	Author	2	UNIV-VIRGINIA	UNIV-VIRGINIA	UNIV-VIRGINIA	University	University - Rank 101-200	University - Rank 101-200	University - Rank 101-200	1	0	0	0	0	0	0	1	0	0	0	0	0	0	0	0	0	1	0	0	0	1	0	0	1	Article
49862870	Conceptualising global health: theoretical issues and their relevance for teaching	GLOBALIZATION AND HEALTH	10	10	Gold OA article (APC)	Gold OA	10	Yudkin-JS	Yudkin	John S.	Author	10	UCL	UCL	UCL	University	University - Rank 001-025	University - Rank 001-025	University - Rank 001-025	1	2145	0	1	0	0	0	0	0	0	0	0	0	0	1	0	0	0	0	0	0	1	1	1	0	Article
46741490	Confronting Intimate Partner Violence: A Global Health Priority	MOUNT SINAI JOURNAL OF MEDICINE	2	4	Green OA article	Green OA	2	Krishnan-S	Krishnan	Suneeta	Author, Reprint Author	1	RTI-INT	RTI-INT	RTI-INT	Company	Company	Company	Company	1	0	0	0	0	1	0	0	1	0	0	0	0	0	0	0	0	0	0	0	0	0	0	0	1	Article
45886475	Consensus Statement on Standard of Care for Congenital Muscular Dystrophies	JOURNAL OF CHILD NEUROLOGY	40	29	Green OA article	Green OA	40	Zeller-R	Zeller	Reinhard	Author	29	HOSP-SICK-CHILDREN	HOSP-SICK-CHILDREN	HOSP-SICK-CHILDREN	Hospital	University - Rank 001-025	University-Hospital	Hospital	1	0	0	0	0	1	0	0	0	0	1	0	0	0	0	0	0	0	0	0	0	0	0	0	1	Article
48224687	Consensus Statement on Standard of Care for Congenital Myopathies	JOURNAL OF CHILD NEUROLOGY	34	22	Toll access article	Toll access	34	Yuan-N	Yuan	Nanci	Author	1	STANFORD-UNIV	STANFORD-UNIV	STANFORD-UNIV	University	University - Rank 001-025	University - Rank 001-025	University - Rank 001-025	1	0	0	0	0	0	0	1	0	0	0	0	0	0	1	0	0	0	0	0	0	1	0	1	0	Article
47383962	Considerations for the Safe and Effective Use of Iron Interventions in Areas of Malaria Burden - Executive Summary	INTERNATIONAL JOURNAL FOR VITAMIN AND NUTRITION RESEARCH	3	2	Toll access article	Toll access	3	Brabin-B	Brabin	Bernard	Author	2	UNIV-LIVERPOOL	UNIV-LIVERPOOL	UNIV-LIVERPOOL	University	University - Rank 101-200	University - Rank 101-200	University - Rank 101-200	1	0	0	0	0	0	0	1	0	0	0	0	0	0	0	0	0	1	0	0	0	1	0	0	1	Article
50799148	Constitutional rights to health, public health and medical care: The status of health protections in 191 countries	GLOBAL PUBLIC HEALTH	4	2	Toll access article	Toll access	4	Mishra-L	Mishra	Lipi	Author	2	MCGILL-UNIV	MCGILL-UNIV	MCGILL-UNIV	University	University - Rank 026-050	University - Rank 026-050	University - Rank 026-050	1	0	0	0	0	0	0	1	0	0	0	0	0	0	0	1	0	0	0	0	0	1	0	1	0	Article
53724864	Contemporary Issues in Rheumatic Fever and Chronic Rheumatic Heart Disease	CIRCULATION	2	2	Hybrid article	Hybrid	1	Essop-MR	Essop	Mohammed R.	Author, Reprint Author	1	CH-BARAGWANATH-HOSP	CH-BARAGWANATH-HOSP	CH-BARAGWANATH-HOSP	Hospital	Hospital	Hospital	Hospital	1	4600	0	0	0	0	1	0	0	0	1	0	0	0	0	0	0	0	0	0	0	0	1	0	1	Review
47363349	Contribution of Obesity to International Differences in Life Expectancy	AMERICAN JOURNAL OF PUBLIC HEALTH	2	1	Green OA article	Green OA	2	Stokes-A	Stokes	Andrew	Author	1	UNIV-PENN	UNIV-PENN	UNIV-PENN	University	University - Rank 001-025	University - Rank 001-025	University - Rank 001-025	1	0	0	0	0	1	0	0	0	0	0	0	0	0	1	0	0	0	0	0	0	1	0	1	0	Article
51251594	Contributions of Positive Psychology to Peace Toward Global Well-Being and Resilience	AMERICAN PSYCHOLOGIST	4	4	Green OA article	Green OA	4	Das-C	Das	Chaitali	Author	4	QUEENS-UNIV-BELFAST	QUEENS-UNIV-BELFAST	QUEENS-UNIV-BELFAST	University	University - Rank 201-500	University - Rank 201-500	University - Rank 201-500	1	0	0	0	0	1	0	0	0	0	0	0	0	0	0	0	0	0	1	0	0	1	0	0	1	Article
50774782	Control of iron deficiency anemia in low- and middle-income countries	BLOOD	5	5	Hybrid article	Hybrid	5	Biggs-BA	Biggs	Beverley-Ann	Author	2	UNIV-MELBOURNE	UNIV-MELBOURNE	UNIV-MELBOURNE	University	University - Rank 026-050	University - Rank 026-050	University - Rank 026-050	1	2000	0	0	0	0	1	0	0	0	0	0	0	0	0	1	0	0	0	0	0	1	1	1	0	Review
44650818	Controlling Alcohol-Related Global Health Problems	ASIA-PACIFIC JOURNAL OF PUBLIC HEALTH	2	1	Toll access article	Toll access	2	Chim-D	Chim	David	Author	1	UNIV-HONG-KONG	UNIV-HONG-KONG	UNIV-HONG-KONG	University	University - Rank 026-050	University - Rank 026-050	University - Rank 026-050	1	0	0	0	0	0	0	1	0	0	0	0	0	0	0	1	0	0	0	0	0	1	0	1	0	Article
46421802	Cool aid? Health, wellbeing and place in the work of Bono and U2	HEALTH & PLACE	4	4	Toll access article	Toll access	4	Carr-ER	Carr	Edward R.	Author	4	UNIV-S-CAROLINA	UNIV-S-CAROLINA	UNIV-S-CAROLINA	University	University: Unranked	University: Unranked	University: Unranked	1	0	0	0	0	0	0	1	0	0	0	0	0	0	0	0	0	0	0	0	1	1	0	0	1	Article
48835881	Correlates of physical activity: why are some people physically active and others not?	LANCET	6	8	Green OA article	Green OA	6	Martin-BW	Martin	Brian W.	Author	8	UNIV-ZURICH	UNIV-ZURICH	UNIV-ZURICH	University	University - Rank 101-200	University - Rank 101-200	University - Rank 101-200	1	0	0	0	0	1	0	0	0	0	0	0	0	0	0	0	0	1	0	0	0	1	0	0	1	Article
47918977	Correlation of worldwide incidence of type 1 diabetes (DiaMond) with prevalence of asthma and atopic eczema (ISAAC)	CLINICAL RESPIRATORY JOURNAL	4	2	Toll access article	Toll access	4	Montefort-S	Montefort	Stephen	Author	1	UNIV-MALTA	UNIV-MALTA	UNIV-MALTA	University	University: Unranked	University: Unranked	University: Unranked	1	0	0	0	0	0	0	1	0	0	0	0	0	0	0	0	0	0	0	0	1	1	0	0	1	Article
51200083	Cost of peritoneal dialysis and haemodialysis across the world	NEPHROLOGY DIALYSIS TRANSPLANTATION	4	5	Hybrid article	Hybrid	4	Ronco-C	Ronco	Claudio	Author, Reprint Author	1	SAN-BORTOLO-HOSP	SAN-BORTOLO-HOSP	SAN-BORTOLO-HOSP	Hospital	Hospital	Hospital	Hospital	1	2800	0	0	0	0	1	0	0	0	1	0	0	0	0	0	0	0	0	0	0	0	1	0	1	Article
47798734	Costly drugs: analysis and proposals for the Mercosur countries	REVISTA PANAMERICANA DE SALUD PUBLICA-PAN AMERICAN JOURNAL OF PUBLIC HEALTH	2	2	Gold OA article (non-APC)	Gold OA	2	Polach-MA	Andrea Polach	Maria	Author	2	MINIST-SALUD	MINIST-SALUD	MINIST-SALUD	Government	Government	Government	Government	1	0	0	0	1	0	0	0	0	1	0	0	0	0	0	0	0	0	0	0	0	0	0	0	1	Article
53491887	Counterflows for mental well-being: What high-income countries can learn from Low and middle-income countries	INTERNATIONAL REVIEW OF PSYCHIATRY	3	3	Toll access article	Toll access	3	GiurgiOncu-C	Giurgi-Oncu	Catalina	Author	3	VICTOR-BABES-UNIV-MED-&-PHARM-TIMISOARA	VICTOR-BABES-UNIV-MED-&-PHARM-TIMISOARA (UNIV-HOSP)	VICTOR-BABES-UNIV-MED-&-PHARM-TIMISOARA (UNIV-HOSP)	University	University: Unranked	University: Unranked	University: Unranked	1	0	0	0	0	0	0	1	0	0	0	0	0	0	0	0	0	0	0	0	1	1	0	0	1	Article
52096797	Country clustering applied to the water and sanitation sector: A new tool with potential applications in research and policy	INTERNATIONAL JOURNAL OF HYGIENE AND ENVIRONMENTAL HEALTH	4	1	Green OA article	Green OA	4	Bartram-J	Bartram	Jamie	Author, Reprint Author	1	UNIV-N-CAROLINA	UNIV-N-CAROLINA	UNIV-N-CAROLINA	University	University - Rank 051-100	University - Rank 51-100	University - Rank 051-100	1	0	0	0	0	1	0	0	0	0	0	0	0	0	0	0	1	0	0	0	0	1	0	0	1	Article
50215729	Country- and individual-level socioeconomic determinants of depression: multilevel cross-national comparison	BRITISH JOURNAL OF PSYCHIATRY	5	5	Hybrid article	Hybrid	5	Araya-R	Araya	Ricardo	Author	1	UNIV-BRISTOL	UNIV-BRISTOL	UNIV-BRISTOL	University	University - Rank 051-100	University - Rank 51-100	University - Rank 051-100	1	4500	0	0	0	0	1	0	0	0	0	0	0	0	0	0	1	0	0	0	0	1	1	0	1	Article
46763974	Coverage Policy for Neurorehabilitation: An International Perspective	NEUROREHABILITATION AND NEURAL REPAIR	2	2	Toll access article	Toll access	2	Stuart-M	Stuart	Mary	Author	2	UNIV-MARYLAND-BALTIMORE-CTY	UMBC	UMBC	University	University - Rank 201-500	University - Rank 201-500	University - Rank 201-500	1	0	0	0	0	0	0	1	0	0	0	0	0	0	0	0	0	0	1	0	0	1	0	0	1	Article
47163424	Creating and Using New Data Sources to Analyze the Relationship Between Social Policy and Global Health: The Case of Maternal Leave	PUBLIC HEALTH REPORTS	3	2	Green OA article	Green OA	3	Earle-A	Earle	Alison	Author	2	NORTHEASTERN-UNIV	NORTHEASTERN-UNIV	NORTHEASTERN-UNIV	University	University - Rank 501+	University - Rank 501+	University - Rank 501+	1	0	0	0	0	1	0	0	0	0	0	0	0	0	0	0	0	0	0	1	0	1	0	0	1	Article
52292895	Critical Anthropology of Global Health "Takes a Stand"Statement: A Critical Medical Anthropological Approach to the U.S.'s Affordable Care Act	MEDICAL ANTHROPOLOGY QUARTERLY	4	4	Toll access article	Toll access	4	Thompson-JJ	Thompson	Jennifer Jo	Author	4	UNIV-GEORGIA	UNIV-GEORGIA	UNIV-GEORGIA	University	University - Rank 201-500	University - Rank 201-500	University - Rank 201-500	1	0	0	0	0	0	0	1	0	0	0	0	0	0	0	0	0	0	1	0	0	1	0	0	1	Article
45171580	Critical Care 1 Critical care and the global burden of critical illness in adults	LANCET	4	3	Toll access article	Toll access	4	Rubenfeld-GD	Rubenfeld	Gordon D.	Author, Reprint Author	1	SUNNYBROOK-HLTH-SCI-CTR	SUNNYBROOK-HLTH-SCI-CTR	SUNNYBROOK-HLTH-SCI-CTR	Hospital	University - Rank 001-025	University-Hospital	Hospital	1	0	0	0	0	0	0	1	0	0	1	0	0	0	0	0	0	0	0	0	0	0	0	0	1	Article
44439898	Cross-National Analysis of the Associations between Traumatic Events and Suicidal Behavior: Findings from the WHO World Mental Health Surveys	PLOS ONE	26	24	Gold OA article (APC)	Gold OA	26	Nock-MK	Nock	Matthew K.	Author	24	HARVARD-UNIV	HARVARD-UNIV	HARVARD-UNIV	University	University - Rank 001-025	University - Rank 001-025	University - Rank 001-025	1	1495	0	1	0	0	0	0	0	0	0	0	0	0	1	0	0	0	0	0	0	1	1	1	0	Article
46701973	Cross-National Sources of Health Inequality: Education and Tobacco Use in the World Health Survey	DEMOGRAPHY	2	2	Green OA article	Green OA	2	Denney-JT	Denney	Justin T.	Author	2	RICE-UNIV	RICE-UNIV	RICE-UNIV	University	University - Rank 051-100	University - Rank 51-100	University - Rank 051-100	1	0	0	0	0	1	0	0	0	0	0	0	0	0	0	0	1	0	0	0	0	1	0	0	1	Article
52131530	Cross-boundary Cancer Studies at the University of Tokyo: The Globalization of Healthcare	JAPANESE JOURNAL OF CLINICAL ONCOLOGY	1	1	Hybrid article	Hybrid	1	Shibuya-K	Shibuya	Kenji	Author, Reprint Author	1	UNIV-TOKYO	UNIV-TOKYO	UNIV-TOKYO	University	University - Rank 026-050	University - Rank 026-050	University - Rank 026-050	1	2800	0	0	0	0	1	0	0	0	0	0	0	0	0	1	0	0	0	0	0	1	1	1	0	Article
52810121	Crossing the Interspecies Barrier: Opening the Door to Zoonotic Pathogens	PLOS PATHOGENS	26	25	Gold OA article (APC)	Gold OA	26	Mysterud-A	Mysterud	Atle	Author	25	UNIV-OSLO	UNIV-OSLO	UNIV-OSLO	University	University - Rank 101-200	University - Rank 101-200	University - Rank 101-200	1	2250	0	1	0	0	0	0	0	0	0	0	0	0	0	0	0	1	0	0	0	1	1	0	1	Article
49631703	Crossing the quality chasm in resource-limited settings	GLOBALIZATION AND HEALTH	10	8	Gold OA article (APC)	Gold OA	10	Shilpakar-S	Shilpakar	Sona	Author	1	BAYALPATA-HOSP	BAYALPATA-HOSP	BAYALPATA-HOSP	Hospital	Hospital	Hospital	Hospital	1	2145	0	1	0	0	0	0	0	0	1	0	0	0	0	0	0	0	0	0	0	0	1	0	1	Review
53440346	Current initiatives in One Health: consolidating the One Health Global Network	REVUE SCIENTIFIQUE ET TECHNIQUE DE L OFFICE INTERNATIONAL DES EPIZOOTIES	2	2	Toll access article	Toll access	2	Welburn-SC	Welburn	S. C.	Author	2	UNIV-EDINBURGH	UNIV-EDINBURGH	UNIV-EDINBURGH	University	University - Rank 026-050	University - Rank 026-050	University - Rank 026-050	1	0	0	0	0	0	0	1	0	0	0	0	0	0	0	1	0	0	0	0	0	1	0	1	0	Article
48950847	Current needs and future directions of occupational safety and heath in a globalized world	NEUROTOXICOLOGY	7	4	Green OA article	Green OA	7	Aschner-M	Aschner	Michael	Author, Reprint Author	1	VANDERBILT-UNIV	VANDERBILT-UNIV	VANDERBILT-UNIV	University	University - Rank 101-200	University - Rank 101-200	University - Rank 101-200	1	0	0	0	0	1	0	0	0	0	0	0	0	0	0	0	0	1	0	0	0	1	0	0	1	Article
52889373	DSM-5 AND ICD-11 DEFINITIONS OF POSTTRAUMATIC STRESS DISORDER: INVESTIGATING "NARROW" AND "BROAD" APPROACHES	DEPRESSION AND ANXIETY	24	23	Green OA article	Green OA	24	Kessler-RC	Kessler	Ronald C.	Author	6	HARVARD-UNIV	HARVARD-UNIV	HARVARD-UNIV	University	University - Rank 001-025	University - Rank 001-025	University - Rank 001-025	1	0	0	0	0	1	0	0	0	0	0	0	0	0	1	0	0	0	0	0	0	1	0	1	0	Article
49669169	Data Resource Profile: United Nations Children's Fund (UNICEF)	INTERNATIONAL JOURNAL OF EPIDEMIOLOGY	2	1	Green OA article	Green OA	2	Newby-H	Newby	Holly	Author	1	UNITED-NATIONS-CHILDRENS-FUND	UNITED-NATIONS-CHILDRENS-FUND	UNITED-NATIONS-CHILDRENS-FUND	Non-profit	Non-profit	Non-profit	Non-profit	1	0	0	0	0	1	0	0	0	0	0	1	0	0	0	0	0	0	0	0	0	0	0	0	1	Article
47516260	Days out of role due to common physical and mental conditions: results from the WHO World Mental Health surveys	MOLECULAR PSYCHIATRY	29	30	Green OA article	Green OA	29	Kessler-RC	Kessler	R. C.	Author	3	HARVARD-UNIV	HARVARD-UNIV	HARVARD-UNIV	University	University - Rank 001-025	University - Rank 001-025	University - Rank 001-025	1	0	0	0	0	1	0	0	0	0	0	0	0	0	1	0	0	0	0	0	0	1	0	1	0	Article
45957730	Daytime consequences of insomnia symptoms among outpatients in primary care practice: EQUINOX international survey	SLEEP MEDICINE	6	5	Toll access article	Toll access	6	Hedner-J	Hedner	Jan	Author	5	SAHLGRENS-UNIV-HOSP	SAHLGRENS-UNIV-HOSP	SAHLGRENS-UNIV-HOSP	Hospital	University - Rank 101-200	University-Hospital	Hospital	1	0	0	0	0	0	0	1	0	0	1	0	0	0	0	0	0	0	0	0	0	0	0	0	1	Article
52448905	De-Politicizing Parasites: Reflections on Attempts to Control the Control of Neglected Tropical Diseases	MEDICAL ANTHROPOLOGY	2	2	Green OA article	Green OA	2	Allen-T	Allen	Tim	Author	2	LONDON-SCH-ECON-&-POLIT-SCI	LONDON-SCH-ECON	LONDON-SCH-ECON	University	University - Rank 001-025	University - Rank 001-025	University - Rank 001-025	1	0	0	0	0	1	0	0	0	0	0	0	0	0	1	0	0	0	0	0	0	1	0	1	0	Article
45979914	Death in Seclusion - A Worldwide Phenomenon Illustrated on Fringe Groups in Munich	GESUNDHEITSWESEN	7	2	Toll access article	Toll access	7	Graw-M	Graw	M.	Author	1	UNIV-MUNICH	UNIV-MUNICH	UNIV-MUNICH	University	University - Rank 026-050	University - Rank 026-050	University - Rank 026-050	1	0	0	0	0	0	0	1	0	0	0	0	0	0	0	1	0	0	0	0	0	1	0	1	0	Article
49245849	Defining and assessing evidence for the effectiveness of technical assistance in furthering global health	GLOBAL PUBLIC HEALTH	4	1	Green OA article	Green OA	4	Cates-W	Cates	Willard	Author	1	FHI-360	FHI-360	FHI-360	Non-profit	Non-profit	Non-profit	Non-profit	1	0	0	0	0	1	0	0	0	0	0	1	0	0	0	0	0	0	0	0	0	0	0	0	1	Article
49930691	Defining communication disability in under-served communities in response to the World Report on Disability	INTERNATIONAL JOURNAL OF SPEECH-LANGUAGE PATHOLOGY	2	2	Toll access article	Toll access	2	Harding-S	Harding	Sam	Author	2	FRENCHAY-HOSP	FRENCHAY-HOSP	FRENCHAY-HOSP	Hospital	Hospital	Hospital	Hospital	1	0	0	0	0	0	0	1	0	0	1	0	0	0	0	0	0	0	0	0	0	0	0	0	1	Article
49669170	Demographic and health surveys: a profile	INTERNATIONAL JOURNAL OF EPIDEMIOLOGY	4	2	Hybrid article	Hybrid	4	Subramanian-SV	Subramanian	S. V.	Author, Reprint Author	2	HARVARD-UNIV	HARVARD-UNIV	HARVARD-UNIV	University	University - Rank 001-025	University - Rank 001-025	University - Rank 001-025	1	3200	0	0	0	0	1	0	0	0	0	0	0	0	1	0	0	0	0	0	0	1	1	1	0	Article
52731188	Demonstrating a Correlation Between the Maturity of Road Safety Practices and Road Safety Incidents	TRAFFIC INJURY PREVENTION	2	1	Toll access article	Toll access	2	Willis-CJ	Willis	Christopher Joseph	Author	1	CONCORDIA-UNIV	CONCORDIA-UNIV	CONCORDIA-UNIV	University	University - Rank 501+	University - Rank 501+	University - Rank 501+	1	0	0	0	0	0	0	1	0	0	0	0	0	0	0	0	0	0	0	1	0	1	0	0	1	Article
53656254	Dentistry in the 21st century: challenges of a globalising world	INTERNATIONAL DENTAL JOURNAL	8	6	Toll access article	Toll access	8	Wilson-N	Wilson	Nairn	Author	6	KINGS-COLL-LONDON	KINGS-COLL-LONDON	KINGS-COLL-LONDON	University	University - Rank 026-050	University - Rank 026-050	University - Rank 026-050	1	0	0	0	0	0	0	1	0	0	0	0	0	0	0	1	0	0	0	0	0	1	0	1	0	Article
46621499	Department of Defense influenza and other respiratory disease surveillance during the 2009 pandemic	BMC PUBLIC HEALTH	35	25	Gold OA article (APC)	Gold OA	35	Russell-KL	Russell	Kevin L.	Author	1	USAF	USAF	USAF	Government	Government	Government	Government	1	2145	0	1	0	0	0	0	0	1	0	0	0	0	0	0	0	0	0	0	0	0	1	0	1	Review
52230558	Designing an ethics curriculum to support global health experiences in surgery	JOURNAL OF SURGICAL RESEARCH	9	8	Toll access article	Toll access	9	Brewster-LP	Brewster	Luke P.	Author, Reprint Author	5	EMORY-UNIV	EMORY-UNIV	EMORY-UNIV	University	University - Rank 051-100	University - Rank 51-100	University - Rank 051-100	1	0	0	0	0	0	0	1	0	0	0	0	0	0	0	0	1	0	0	0	0	1	0	0	1	Article
47186339	Designing the Next Generation of Vaccines for Global Public Health	OMICS-A JOURNAL OF INTEGRATIVE BIOLOGY	9	1	Toll access article	Toll access	9	Rappuoli-R	Rappuoli	Rino	Author	1	NOVARTIS-VACCINES-&-DIAGNOST	NOVARTIS-VACCINES-&-DIAGNOST	NOVARTIS-VACCINES-&-DIAGNOST	Company	Company	Company	Company	1	0	0	0	0	0	0	1	1	0	0	0	0	0	0	0	0	0	0	0	0	0	0	0	1	Review
49697568	Desirable attributes of vaccines for deployment in low-resource settings	JOURNAL OF PHARMACEUTICAL SCIENCES	2	1	Toll access article	Toll access	2	Zehrung-D	Zehrung	Darin	Author	1	PATH	PATH	PATH	Non-profit	Non-profit	Non-profit	Non-profit	1	0	0	0	0	0	0	1	0	0	0	1	0	0	0	0	0	0	0	0	0	0	0	0	1	Article
44768382	Determinants of oral cancer at the national level: just a question of smoking and alcohol drinking prevalence?	ODONTOLOGY	2	2	Toll access article	Toll access	2	Scully-C	Scully	Crispian	Author	2	UCL	UCL	UCL	University	University - Rank 001-025	University - Rank 001-025	University - Rank 001-025	1	0	0	0	0	0	0	1	0	0	0	0	0	0	1	0	0	0	0	0	0	1	0	1	0	Article
49237085	Developed-developing country partnerships: Benefits to developed countries?	GLOBALIZATION AND HEALTH	11	5	Gold OA article (APC)	Gold OA	11	Pittet-D	Pittet	Didier	Author, Reprint Author	1	WHO-HEADQUARTERS	WHO	WHO	Non-profit	Non-profit	Non-profit	Non-profit	1	2145	0	1	0	0	0	0	0	0	0	1	0	0	0	0	0	0	0	0	0	0	1	0	1	Review
46465347	Developing Medicines in Line with Global Public Health Needs: The Role of the World Health Organization	CAMBRIDGE QUARTERLY OF HEALTHCARE ETHICS	1	2	Toll access article	Toll access	1	Pang-T	Pang	Tikki	Author, Reprint Author	1	WHO	WHO	WHO	Non-profit	Non-profit	Non-profit	Non-profit	1	0	0	0	0	0	0	1	0	0	0	1	0	0	0	0	0	0	0	0	0	0	0	0	1	Article
44024835	Developing Priorities for Addressing Surgical Conditions Globally: Furthering the Link Between Surgery and Public Health Policy	WORLD JOURNAL OF SURGERY	7	7	Green OA article	Green OA	7	McQueen-K	McQueen	Kelly	Author	7	HARVARD-HUMANITARIAN-INITIAT	HARVARD-UNIV	HARVARD-MED-SCH	Hospital	University - Rank 001-025	University-Hospital	Hospital	1	0	0	0	0	1	0	0	0	0	1	0	0	0	0	0	0	0	0	0	0	0	0	0	1	Article
48583159	Developing World ENT: a global responsibility	JOURNAL OF LARYNGOLOGY AND OTOLOGY	1	1	Toll access article	Toll access	1	Fagan-JJ	Fagan	J. J.	Author, Reprint Author	1	UNIV-CAPE-TOWN	UNIV-CAPE-TOWN	UNIV-CAPE-TOWN	University	University - Rank 101-200	University - Rank 101-200	University - Rank 101-200	1	0	0	0	0	0	0	1	0	0	0	0	0	0	0	0	0	1	0	0	0	1	0	0	1	Review
53857804	Developing a Global Curriculum in a School of Nursing	JOURNAL OF NURSING EDUCATION	2	3	Toll access article	Toll access	2	Baernholdt-M	Baernholdt	Marianne	Author, Reprint Author	1	UNIV-VIRGINIA	UNIV-VIRGINIA	UNIV-VIRGINIA	University	University - Rank 101-200	University - Rank 101-200	University - Rank 101-200	1	0	0	0	0	0	0	1	0	0	0	0	0	0	0	0	0	1	0	0	0	1	0	0	1	Article
53019131	Developing a Professional Pathway in Health Equity to Facilitate Curricular Transformation at the University of Michigan Medical School	ACADEMIC MEDICINE	9	9	Hybrid article	Hybrid	9	Mangrulkar-RS	Mangrulkar	Rajesh S.	Author	9	UNIV-MICHIGAN	UNIV-MICHIGAN	UNIV-MICHIGAN	University	University - Rank 001-025	University - Rank 001-025	University - Rank 001-025	1	3900	0	0	0	0	1	0	0	0	0	0	0	0	1	0	0	0	0	0	0	1	1	1	0	Article
50840700	Developing a Scorecard to Assess Global Progress in Scaling Up Diarrhea Control Tools: A Qualitative Study of Academic Leaders and Implementers	PLOS ONE	3	2	Gold OA article (APC)	Gold OA	3	Yamey-G	Yamey	Gavin	Author	2	UNIV-CALIF-SAN-FRANCISCO	UCSF	UCSF	University	University - Rank 001-025	University - Rank 001-025	University - Rank 001-025	1	1495	0	1	0	0	0	0	0	0	0	0	0	0	1	0	0	0	0	0	0	1	1	1	0	Article
47151609	Developing a curriculum framework for global health in family medicine: emerging principles, competencies, and educational approaches	BMC MEDICAL EDUCATION	11	8	Gold OA article (APC)	Gold OA	11	Pottie-K	Pottie	Kevin	Author	8	UNIV-OTTAWA	UNIV-OTTAWA	UNIV-OTTAWA	University	University - Rank 201-500	University - Rank 201-500	University - Rank 201-500	1	2145	0	1	0	0	0	0	0	0	0	0	0	0	0	0	0	0	1	0	0	1	1	0	1	Article
46960239	Developing a global health practitioner: Time to act?	MEDICAL TEACHER	2	2	Toll access article	Toll access	2	McLean-M	McLean	Michelle	Author	2	UNITED-ARAB-EMIRATES-UNIV	UNITED-ARAB-EMIRATES-UNIV	UNITED-ARAB-EMIRATES-UNIV	University	University - Rank 501+	University - Rank 501+	University - Rank 501+	1	0	0	0	0	0	0	1	0	0	0	0	0	0	0	0	0	0	0	1	0	1	0	0	1	Article
46442768	Developing a global strategy to prevent Alzheimer's disease: Leon Thal Symposium 2010	ALZHEIMERS & DEMENTIA	17	18	Toll access article	Toll access	17	Bain-LJ	Bain	Lisa J.	Author	18	CAMPAIGN-PREVENT-ALZHEIMERS-DIS-2020	CAMPAIGN-PREVENT-ALZHEIMERS-DIS-2020	CAMPAIGN-PREVENT-ALZHEIMERS-DIS-2020	Non-profit	Non-profit	Non-profit	Non-profit	1	0	0	0	0	0	0	1	0	0	0	1	0	0	0	0	0	0	0	0	0	0	0	0	1	Article
46042541	Developing an understanding between people: The key to global health	TRAVEL MEDICINE AND INFECTIOUS DISEASE	1	1	Toll access article	Toll access	1	Serafin-A	Serafin	Alina	Author, Reprint Author	1	UCL	UCL	UCL	University	University - Rank 001-025	University - Rank 001-025	University - Rank 001-025	1	0	0	0	0	0	0	1	0	0	0	0	0	0	1	0	0	0	0	0	0	1	0	1	0	Article
51367194	Developing global health technology standards: what can other industries teach us?	GLOBALIZATION AND HEALTH	3	4	Gold OA article (APC)	Gold OA	3	Bartleson-K	Bartleson	Karen	Author	4	SYNOPSYS-INC	SYNOPSYS-INC	SYNOPSYS-INC	Company	Company	Company	Company	1	2145	0	1	0	0	0	0	1	0	0	0	0	0	0	0	0	0	0	0	0	0	1	0	1	Article
51769712	Development and Evaluation of Global Child Health Educational Modules	PEDIATRICS	17	17	Delayed OA article	Delayed OA	17	Brenner-JL	Brenner	Jennifer L.	Author	9	ALBERTA-CHILDRENS-PROV-GEN-HOSP	ALBERTA-CHILDRENS-PROV-GEN-HOSP	ALBERTA-CHILDRENS-PROV-GEN-HOSP	Hospital	Hospital	Hospital	Hospital	1	0	1	0	0	0	0	0	0	0	1	0	0	0	0	0	0	0	0	0	0	0	0	0	1	Article
53698285	Development and future directions for the Joint United Nations Programme on HIV/AIDS estimates	AIDS	5	3	Green OA article	Green OA	5	Ghys-PD	Ghys	Peter D.	Author	3	UNAIDS	UNAIDS	UNAIDS	Non-profit	Non-profit	Non-profit	Non-profit	1	0	0	0	0	1	0	0	0	0	0	1	0	0	0	0	0	0	0	0	0	0	0	0	1	Article
48974615	Development assistance for global tobacco control	TOBACCO CONTROL	2	1	Green OA article	Green OA	2	Stoklosa-M	Stoklosa	Michal	Author	1	AMER-CANC-SOC	AMER-CANC-SOC	AMER-CANC-SOC	Scientific association	Scientific association	Scientific association	Scientific association	1	0	0	0	0	1	0	0	0	0	0	0	0	1	0	0	0	0	0	0	0	0	0	0	1	Article
52363926	Development of a Global Health Curriculum for Family Medicine Based on ACGME Competencies	TEACHING AND LEARNING IN MEDICINE	2	1	Toll access article	Toll access	2	Solberg-E	Solberg	Erik	Author	1	UNIV-MINNESOTA	UNIV-MINNESOTA	UNIV-MINNESOTA	University	University - Rank 051-100	University - Rank 51-100	University - Rank 051-100	1	0	0	0	0	0	0	1	0	0	0	0	0	0	0	0	1	0	0	0	0	1	0	0	1	Article
52264592	Diabetes in the young - a global view and worldwide estimates of numbers of children with type 1 diabetes	DIABETES RESEARCH AND CLINICAL PRACTICE	6	8	Green OA article	Green OA	6	Silink-M	Silink	Martin	Author	5	INT-DIABET-FEDERAT-LIFE-CHILD-PROGRAM	INT-DIABET-FEDERAT-LIFE-CHILD-PROGRAM	INT-DIABET-FEDERAT-LIFE-CHILD-PROGRAM	Non-profit	Non-profit	Non-profit	Non-profit	1	0	0	0	0	1	0	0	0	0	0	1	0	0	0	0	0	0	0	0	0	0	0	0	1	Article
53581498	Diabetic pregnancy: an overview of current guidelines and clinical practice	CURRENT OPINION IN OBSTETRICS & GYNECOLOGY	3	2	Toll access article	Toll access	3	Malecki-MT	Malecki	Maciej T.	Author, Reprint Author	1	JAGIELLONIAN-UNIV	JAGIELLONIAN-UNIV	JAGIELLONIAN-UNIV	University	University - Rank 501+	University - Rank 501+	University - Rank 501+	1	0	0	0	0	0	0	1	0	0	0	0	0	0	0	0	0	0	0	1	0	1	0	0	1	Review
47648249	Diagnosis and Natural History of HIV-Associated Nephropathy	ADVANCES IN CHRONIC KIDNEY DISEASE	1	1	Green OA article	Green OA	1	Atta-MG	Atta	Mohamed G.	Author, Reprint Author	1	JOHNS-HOPKINS-UNIV	JOHNS-HOPKINS-UNIV	JOHNS-HOPKINS-UNIV	University	University - Rank 001-025	University - Rank 001-025	University - Rank 001-025	1	0	0	0	0	1	0	0	0	0	0	0	0	0	1	0	0	0	0	0	0	1	0	1	0	Article
44904198	Diarrhoea morbidity and mortality in older children, adolescents, and adults	EPIDEMIOLOGY AND INFECTION	2	1	Toll access article	Toll access	2	Black-RE	Black	R. E.	Author	1	JOHNS-HOPKINS-BLOOMBERG-SCH-PUBL-HLTH	JOHNS-HOPKINS-UNIV	JOHNS-HOPKINS-UNIV	University	University - Rank 001-025	University - Rank 001-025	University - Rank 001-025	1	0	0	0	0	0	0	1	0	0	0	0	0	0	1	0	0	0	0	0	0	1	0	1	0	Review
51582220	Diarrhoeal diseases and the global health agenda: measuring and changing priority	HEALTH POLICY AND PLANNING	3	2	Hybrid article	Hybrid	3	Johnson-AM	Johnson	Anne M.	Author	2	HARVARD-UNIV	HARVARD-UNIV	HARVARD-UNIV	University	University - Rank 001-025	University - Rank 001-025	University - Rank 001-025	1	2400	0	0	0	0	1	0	0	0	0	0	0	0	1	0	0	0	0	0	0	1	1	1	0	Article
52669651	Disability prevalence among adults: estimates for 54 countries and progress toward a global estimate	DISABILITY AND REHABILITATION	2	3	Green OA article	Green OA	2	Sambamoorthi-U	Sambamoorthi	Usha	Author	3	W-VIRGINIA-UNIV	W-VIRGINIA-UNIV	W-VIRGINIA-UNIV	University	University: Unranked	University: Unranked	University: Unranked	1	0	0	0	0	1	0	0	0	0	0	0	0	0	0	0	0	0	0	0	1	1	0	0	1	Article
50564598	Disability weights in the Global Burden of Disease 2010: Unclear meaning and overstatement of international agreement	HEALTH POLICY	1	2	Toll access article	Toll access	1	Nord-E	Nord	Erik	Author, Reprint Author	1	NORWEGIAN-INST-PUBL-HLTH	NORWEGIAN-INST-PUBL-HLTH	NORWEGIAN-INST-PUBL-HLTH	Research institute	Research Institute	Research Institute	Research Institute	1	0	0	0	0	0	0	1	0	0	0	0	1	0	0	0	0	0	0	0	0	0	0	0	1	Article
49610479	Disability-adjusted life years (DALYs) for 291 diseases and injuries in 21 regions, 1990-2010: a systematic analysis for the Global Burden of Disease Study 2010	LANCET	359	196	Toll access article	Toll access	359	Lopez-AD	Lopez	Alan D.	Author	2	UNIV-QUEENSLAND	UNIV-QUEENSLAND	UNIV-QUEENSLAND	University	University - Rank 051-100	University - Rank 51-100	University - Rank 051-100	1	0	0	0	0	0	0	1	0	0	0	0	0	0	0	0	1	0	0	0	0	1	0	0	1	Article
52988042	Do We Produce Enough Fruits and Vegetables to Meet Global Health Need?	PLOS ONE	5	4	Gold OA article (APC)	Gold OA	5	Narayan-KMV	Narayan	K. M. Venkat	Author	1	EMORY-UNIV	EMORY-UNIV	EMORY-UNIV	University	University - Rank 051-100	University - Rank 51-100	University - Rank 051-100	1	1495	0	1	0	0	0	0	0	0	0	0	0	0	0	0	1	0	0	0	0	1	1	0	1	Article
52609291	Do medical students want to learn about global health?	GLOBAL HEALTH ACTION	7	6	Gold OA article (APC)	Gold OA	7	Graham-W	Graham	Wendy	Author	6	UNIV-ABERDEEN	UNIV-ABERDEEN	UNIV-ABERDEEN	University	University - Rank 101-200	University - Rank 101-200	University - Rank 101-200	1	1500	0	1	0	0	0	0	0	0	0	0	0	0	0	0	0	1	0	0	0	1	1	0	1	Article
53267978	Do the solutions for global health lie in healthcare?	BMJ-BRITISH MEDICAL JOURNAL	1	2	Hybrid article	Hybrid	1	Clark-J	Clark	Jocalyn	Author, Reprint Author	1	ICDDR-B	INT-CTR-DIARRHOEAL-DIS-RES	INT-CTR-DIARRHOEAL-DIS-RES	Non-profit	Non-profit	Non-profit	Non-profit	1	3034.2	0	0	0	0	1	0	0	0	0	1	0	0	0	0	0	0	0	0	0	0	1	0	1	Article
53165960	Do welfare regimes influence the association between disability and self-perceived health? A multilevel analysis of 57 countries	SOCIAL SCIENCE & MEDICINE	4	2	Green OA article	Green OA	4	Romagnoli-A	Romagnoli	Alessia	Author	1	UNIV-GHENT	UNIV-GHENT	UNIV-GHENT	University	University - Rank 101-200	University - Rank 101-200	University - Rank 101-200	1	0	0	0	0	1	0	0	0	0	0	0	0	0	0	0	0	1	0	0	0	1	0	0	1	Article
48397561	Does Consideration and Assessment of Effects on Health Equity Affect the Conclusions of Systematic Reviews? A Methodology Study	PLOS ONE	10	11	Gold OA article (APC)	Gold OA	10	Tugwell-P	Tugwell	Peter	Author	1	OTTAWA-HOSP	OTTAWA-HOSP	OTTAWA-HOSP	Hospital	University - Rank 201-500	University-Hospital	Hospital	1	1495	0	1	0	0	0	0	0	0	1	0	0	0	0	0	0	0	0	0	0	0	1	0	1	Review
51266303	Domestic Global Health: A Curriculum Teaching Medical Students to Evaluate Refugee Asylum Seekers and Torture Survivors	TEACHING AND LEARNING IN MEDICINE	4	1	Toll access article	Toll access	4	Burnett-DC	Burnett	Delia C.	Author	1	ICAHN-SCH-MED-MT-SINAI	ICAHN-SCH-MED-MT-SINAI	ICAHN-SCH-MED-MT-SINAI	University	University: Unranked	University: Unranked	University: Unranked	1	0	0	0	0	0	0	1	0	0	0	0	0	0	0	0	0	0	0	0	1	1	0	0	1	Article
52606166	Domestic and donor financing for tuberculosis care and control in low-income and middle-income countries: an analysis of trends, 2002-11, and requirements to meet 2015 targets	LANCET GLOBAL HEALTH	4	1	Gold OA article (APC)	Gold OA	4	Raviglione-M	Raviglione	Mario	Author	1	WHO	WHO	WHO	Non-profit	Non-profit	Non-profit	Non-profit	1	5000	0	1	0	0	0	0	0	0	0	1	0	0	0	0	0	0	0	0	0	0	1	0	1	Article
44265999	Drivers of Inequality in Millennium Development Goal Progress: A Statistical Analysis	PLOS MEDICINE	3	5	Gold OA article (APC)	Gold OA	3	McKee-M	McKee	Martin	Author	2	UNIV-LONDON-LONDON-SCH-HYG-&-TROP-MED	UNIV-LONDON-LONDON-SCH-HYG-&-TROP-MED	UNIV-LONDON-LONDON-SCH-HYG-&-TROP-MED	University	University - Rank 001-025	University - Rank 001-025	University - Rank 001-025	1	2900	0	1	0	0	0	0	0	0	0	0	0	0	1	0	0	0	0	0	0	1	1	1	0	Article
48432621	Drug-Resistant Tuberculosis-Current Dilemmas, Unanswered Questions, Challenges, and Priority Needs	JOURNAL OF INFECTIOUS DISEASES	24	33	Hybrid article	Hybrid	24	Atun-R	Atun	Rifat	Author	32	GLOBAL-FUND-FIGHT-AIDS-TB-&-MALARIA	GLOBAL-FUND-FIGHT-AIDS-TB-&-MALARIA	GLOBAL-FUND-FIGHT-AIDS-TB-&-MALARIA	Non-profit	Non-profit	Non-profit	Non-profit	1	3500	0	0	0	0	1	0	0	0	0	1	0	0	0	0	0	0	0	0	0	0	1	0	1	Article
47288742	Drugs and Diagnostic Innovations to Improve Global Health	INFECTIOUS DISEASE CLINICS OF NORTH AMERICA	2	2	Green OA article	Green OA	2	Nwaka-S	Nwaka	Solomon	Author	2	WORLD-HLTH-ORG-SPECIAL-PROGRAMME-RES-&-TRAINING-T	WHO	WHO	Non-profit	Non-profit	Non-profit	Non-profit	1	0	0	0	0	1	0	0	0	0	0	1	0	0	0	0	0	0	0	0	0	0	0	0	1	Article
53713186	E-Waste: A Global Hazard	ANNALS OF GLOBAL HEALTH	4	2	Gold OA article (APC)	Gold OA	4	Sly-PD	Sly	Peter D.	Author, Reprint Author	2	UNIV-QUEENSLAND	UNIV-QUEENSLAND	UNIV-QUEENSLAND	University	University - Rank 051-100	University - Rank 51-100	University - Rank 051-100	1	1200	0	1	0	0	0	0	0	0	0	0	0	0	0	0	1	0	0	0	0	1	1	0	1	Article
49570453	E-consultation for DSD: A global platform for access to expert advice	JOURNAL OF PEDIATRIC UROLOGY	5	5	Toll access article	Toll access	5	Ahmed-SF	Ahmed	S. Faisal	Author	5	UNIV-GLASGOW	UNIV-GLASGOW	UNIV-GLASGOW	University	University - Rank 051-100	University - Rank 51-100	University - Rank 051-100	1	0	0	0	0	0	0	1	0	0	0	0	0	0	0	0	1	0	0	0	0	1	0	0	1	Review
47246658	EARLY REPORTING OF PANDEMIC FLU AND THE CHALLENGE OF GLOBAL SURVEILLANCE: A LESSON FOR SOUTHEAST ASIA	SOUTHEAST ASIAN JOURNAL OF TROPICAL MEDICINE AND PUBLIC HEALTH	2	2	Green OA article	Green OA	2	Coker-R	Coker	Richard	Author	2	LONDON-SCH-HYG-&-TROP-MED	UCL	UCL	University	University - Rank 001-025	University - Rank 001-025	University - Rank 001-025	1	0	0	0	0	1	0	0	0	0	0	0	0	0	1	0	0	0	0	0	0	1	0	1	0	Article
44391487	EMPLOYMENT RELATIONS AND GLOBAL HEALTH: A TYPOLOGICAL STUDY OF WORLD LABOR MARKETS	INTERNATIONAL JOURNAL OF HEALTH SERVICES	3	9	Toll access article	Toll access	3	Benach-J	Benach	Joan	Author	2	POMPEU-FABRA-UNIV	POMPEU-FABRA-UNIV	POMPEU-FABRA-UNIV	University	University - Rank 101-200	University - Rank 101-200	University - Rank 101-200	1	0	0	0	0	0	0	1	0	0	0	0	0	0	0	0	0	1	0	0	0	1	0	0	1	Article
44293137	ESTABLISHING A SUSTAINABLE PARTNERSHIP THROUGH SHORT-TERM GLOBAL FIELD EXPERIENCES: THE UNIVERSITY OF FLORIDA AND CANTON EL LIMON COLLABORATION	PUBLIC HEALTH REPORTS	5	1	Green OA article	Green OA	1	AmayaBurns-A	Amaya-Burns	Alba	Author, Reprint Author	1	UNIV-FLORIDA	UNIV-FLORIDA	UNIV-FLORIDA	University	University - Rank 101-200	University - Rank 101-200	University - Rank 101-200	1	0	0	0	0	1	0	0	0	0	0	0	0	0	0	0	0	1	0	0	0	1	0	0	1	Article
48530865	Early Intervention to Reduce the Global Health and Economic Burden of Major Depression in Older Adults	Annual Review of Public Health	12	7	Green OA article	Green OA	12	Albert-SM	Albert	Steven M.	Author	2	UNIV-PITTSBURGH	UNIV-PITTSBURGH	UNIV-PITTSBURGH	University	University - Rank 051-100	University - Rank 51-100	University - Rank 051-100	1	0	0	0	0	1	0	0	0	0	0	0	0	0	0	0	1	0	0	0	0	1	0	0	1	Review
46031113	Early childhood adversity and later hypertension: Data from the World Mental Health Survey	ANNALS OF CLINICAL PSYCHIATRY	15	15	Green OA article	Green OA	15	VonKorff-M	Von Korff	Michael	Author	15	GRP-HLTH-CTR-HLTH-STUDIES	GRP-HLTH-CTR-HLTH-STUDIES	GRP-HLTH-CTR-HLTH-STUDIES	Research institute	Research Institute	Research Institute	Research Institute	1	0	0	0	0	1	0	0	0	0	0	0	1	0	0	0	0	0	0	0	0	0	0	0	1	Article
51453130	Early implementation of WHO recommendations for the retention of health workers in remote and rural areas	BULLETIN OF THE WORLD HEALTH ORGANIZATION	7	7	Gold OA article (non-APC)	Gold OA	7	Dolea-C	Dolea	Carmen	Author, Reprint Author	7	WHO	WHO	WHO	Non-profit	Non-profit	Non-profit	Non-profit	1	0	0	0	1	0	0	0	0	0	0	1	0	0	0	0	0	0	0	0	0	0	0	0	1	Article
53440361	Ecology and conservation: contributions to One Health	REVUE SCIENTIFIQUE ET TECHNIQUE DE L OFFICE INTERNATIONAL DES EPIZOOTIES	3	2	Toll access article	Toll access	3	Gislason-M	Gislason	M.	Author	2	UNIV-SUSSEX	UNIV-SUSSEX	UNIV-SUSSEX	University	University - Rank 101-200	University - Rank 101-200	University - Rank 101-200	1	0	0	0	0	0	0	1	0	0	0	0	0	0	0	0	0	1	0	0	0	1	0	0	1	Article
49819104	Economic analysis and costing of animal health: a literature review of methods and importance	REVUE SCIENTIFIQUE ET TECHNIQUE DE L OFFICE INTERNATIONAL DES EPIZOOTIES	5	2	Toll access article	Toll access	2	Commault-J	Commault	J.	Author	2	ENSAE	ENSAE	ENSAE	University	University: Unranked	University: Unranked	University: Unranked	1	0	0	0	0	0	0	1	0	0	0	0	0	0	0	0	0	0	0	0	1	1	0	0	1	Review
52475427	Economic impacts of health shocks on households in low and middle income countries: a review of the literature	GLOBALIZATION AND HEALTH	2	2	Gold OA article (APC)	Gold OA	2	Mahal-A	Mahal	Ajay	Author	1	MONASH-UNIV	MONASH-UNIV	MONASH-UNIV	University	University - Rank 051-100	University - Rank 51-100	University - Rank 051-100	1	2145	0	1	0	0	0	0	0	0	0	0	0	0	0	0	1	0	0	0	0	1	1	0	1	Review
46025199	Economic valuations in global health	GLOBAL PUBLIC HEALTH	2	2	Toll access article	Toll access	2	Keusch-G	Keusch	Gerald	Author	2	BOSTON-UNIV	BOSTON-UNIV	BOSTON-UNIV	University	University - Rank 051-100	University - Rank 51-100	University - Rank 051-100	1	0	0	0	0	0	0	1	0	0	0	0	0	0	0	0	1	0	0	0	0	1	0	0	1	Article
51864906	Educational Objectives for International Medical Electives: A Literature Review	ACADEMIC MEDICINE	3	4	Green OA article	Green OA	3	Brewer-TF	Brewer	Timothy F.	Author	4	UNIV-CALIF-LOS-ANGELES	UCLA	UCLA	University	University - Rank 001-025	University - Rank 001-025	University - Rank 001-025	1	0	0	0	0	1	0	0	0	0	0	0	0	0	1	0	0	0	0	0	0	1	0	1	0	Review
52733872	Eggs: the uncracked potential for improving maternal and young child nutrition among the world's poor	NUTRITION REVIEWS	4	4	Green OA article	Green OA	4	Stewart-CP	Stewart	Christine P.	Author	4	UNIV-CALIF-DAVIS	UNIV-CALIF-DAVIS	UNIV-CALIF-DAVIS	University	University - Rank 051-100	University - Rank 51-100	University - Rank 051-100	1	0	0	0	0	1	0	0	0	0	0	0	0	0	0	0	1	0	0	0	0	1	0	0	1	Review
52810196	Electives in undergraduate medical education: AMEE Guide No. 88	MEDICAL TEACHER	2	2	Hybrid article	Hybrid	2	MurdochEaton-D	Murdoch-Eaton	Deborah	Author, Reprint Author	2	UNIV-SHEFFIELD	UNIV-SHEFFIELD	UNIV-SHEFFIELD	University	University - Rank 101-200	University - Rank 101-200	University - Rank 101-200	1	2950	0	0	0	0	1	0	0	0	0	0	0	0	0	0	0	1	0	0	0	1	1	0	1	Article
51048026	Embarrassment when illness strikes a close relative: a World Mental Health Survey Consortium Multi-Site Study	PSYCHOLOGICAL MEDICINE	20	22	Green OA article	Green OA	20	Anthony-JC	Anthony	J. C.	Author	22	MICHIGAN-STATE-UNIV	MICHIGAN-STATE-UNIV	MICHIGAN-STATE-UNIV	University	University - Rank 101-200	University - Rank 101-200	University - Rank 101-200	1	0	0	0	0	1	0	0	0	0	0	0	0	0	0	0	0	1	0	0	0	1	0	0	1	Article
51868669	Embedding sexual and reproductive health and rights in a transformational development framework: lessons learned from the MDG targets and indicators	REPRODUCTIVE HEALTH MATTERS	2	3	Green OA article	Green OA	2	Boulanger-VM	Boulanger	Vanessa M.	Author	3	HARVARD-UNIV	HARVARD-UNIV	HARVARD-UNIV	University	University - Rank 001-025	University - Rank 001-025	University - Rank 001-025	1	0	0	0	0	1	0	0	0	0	0	0	0	0	1	0	0	0	0	0	0	1	0	1	0	Article
50859672	Emergence of multilateral proto-institutions in global health and new approaches to governance: analysis using path dependency and institutional theory	GLOBALIZATION AND HEALTH	2	4	Gold OA article (APC)	Gold OA	2	Atun-R	Atun	Rifat	Author	2	UNIV-LONDON-IMPERIAL-COLL-SCI-TECHNOL-&-MED	UNIV-LONDON-IMPERIAL-COLL-SCI-TECHNOL-&-MED	UNIV-LONDON-IMPERIAL-COLL-SCI-TECHNOL-&-MED	University	University - Rank 001-025	University - Rank 001-025	University - Rank 001-025	1	2145	0	1	0	0	0	0	0	0	0	0	0	0	1	0	0	0	0	0	0	1	1	1	0	Article
51599035	Emergency Care Research Funding in the Global Health Context: Trends, Priorities, and Future Directions	ACADEMIC EMERGENCY MEDICINE	10	10	Hybrid article	Hybrid	10	Hargarten-S	Hargarten	Stephen	Author	10	MED-COLL-WISCONSIN	MED-COLL-WISCONSIN	MED-COLL-WISCONSIN	University	University: Unranked	University: Unranked	University: Unranked	1	3000	0	0	0	0	1	0	0	0	0	0	0	0	0	0	0	0	0	0	1	1	1	0	1	Article
50857733	Emerging Infectious Diseases: Threats to Human Health and Global Stability	PLOS PATHOGENS	2	1	Gold OA article (APC)	Gold OA	2	Fauci-AS	Fauci	Anthony S.	Author	1	NIAID	NIAID	NIAID	Government	Government	Government	Government	1	2250	0	1	0	0	0	0	0	1	0	0	0	0	0	0	0	0	0	0	0	0	1	0	1	Article
52732620	Emerging Issues and Future Directions of the Field of Health Communication	HEALTH COMMUNICATION	6	6	Toll access article	Toll access	6	Street-RL	Street	Richard L.	Author	5	TEXAS-A&M-UNIV	TEXAS-A&M-UNIV	TEXAS-A&M-UNIV	University	University - Rank 101-200	University - Rank 101-200	University - Rank 101-200	1	0	0	0	0	0	0	1	0	0	0	0	0	0	0	0	0	1	0	0	0	1	0	0	1	Article
47833610	Emerging Nutrition Gaps in a World of Affluence - Micronutrient Intake and Status Globally	INTERNATIONAL JOURNAL FOR VITAMIN AND NUTRITION RESEARCH	2	2	Toll access article	Toll access	2	Walter-P	Walter	Paul	Author, Reprint Author	2	UNIV-BASEL	UNIV-BASEL	UNIV-BASEL	University	University - Rank 051-100	University - Rank 51-100	University - Rank 051-100	1	0	0	0	0	0	0	1	0	0	0	0	0	0	0	0	1	0	0	0	0	1	0	0	1	Article
53440357	Emerging zoonotic viral diseases	REVUE SCIENTIFIQUE ET TECHNIQUE DE L OFFICE INTERNATIONAL DES EPIZOOTIES	2	2	Toll access article	Toll access	2	Crameri-G	Crameri	G.	Author	1	CSIRO	CSIRO	CSIRO	Research institute	Research Institute	Research Institute	Research Institute	1	0	0	0	0	0	0	1	0	0	0	0	1	0	0	0	0	0	0	0	0	0	0	0	1	Article
51887129	Empirical impact evaluation of the WHO Global Code of Practice on the International Recruitment of Health Personnel in Australia, Canada, UK and USA	GLOBALIZATION AND HEALTH	2	4	Gold OA article (APC)	Gold OA	2	Hoffman-SJ	Hoffman	Steven J.	Author, Reprint Author	1	HARVARD-UNIV	HARVARD-UNIV	HARVARD-UNIV	University	University - Rank 001-025	University - Rank 001-025	University - Rank 001-025	1	2145	0	1	0	0	0	0	0	0	0	0	0	0	1	0	0	0	0	0	0	1	1	1	0	Article
51322248	Enacting global health in the nursing classroom	NURSE EDUCATION TODAY	2	1	Toll access article	Toll access	2	Ryan-M	Ryan	Maureen	Author	1	UNIV-VICTORIA	UNIV-VICTORIA	UNIV-VICTORIA	University	University - Rank 201-500	University - Rank 201-500	University - Rank 201-500	1	0	0	0	0	0	0	1	0	0	0	0	0	0	0	0	0	0	1	0	0	1	0	0	1	Article
52581954	Enhancing global health and education in Malawi, Zambia, and the United States through an interprofessional global health exchange program	APPLIED NURSING RESEARCH	6	4	Toll access article	Toll access	6	Chimwaza-A	Chimwaza	Angela	Author	4	UNIV-MALAWI	UNIV-MALAWI	UNIV-MALAWI	University	University: Unranked	University: Unranked	University: Unranked	1	0	0	0	0	0	0	1	0	0	0	0	0	0	0	0	0	0	0	0	1	1	0	0	1	Article
52572835	Enhancing medicine price transparency through price information mechanisms	GLOBALIZATION AND HEALTH	3	1	Gold OA article (APC)	Gold OA	3	Schmitt-S	Schmitt	Sarah	Author	1	WHO	WHO	WHO	Non-profit	Non-profit	Non-profit	Non-profit	1	2145	0	1	0	0	0	0	0	0	0	1	0	0	0	0	0	0	0	0	0	0	1	0	1	Article
46621500	Enteric disease surveillance under the AFHSC-GEIS: Current efforts, landscape analysis and vision forward	BMC PUBLIC HEALTH	5	7	Gold OA article (APC)	Gold OA	5	Riddle-MS	Riddle	Mark S.	Author, Reprint Author	1	USN	USN	USN	Government	Government	Government	Government	1	2145	0	1	0	0	0	0	0	1	0	0	0	0	0	0	0	0	0	0	0	0	1	0	1	Review
44774312	Epidemiologic Approaches to Global Health	EPIDEMIOLOGIC REVIEWS	2	3	Green OA article	Green OA	2	Samet-JM	Samet	Jonathan M.	Author	3	UNIV-SO-CALIF	UNIV-SO-CALIF	UNIV-SO-CALIF	University	University - Rank 051-100	University - Rank 51-100	University - Rank 051-100	1	0	0	0	0	1	0	0	0	0	0	0	0	0	0	0	1	0	0	0	0	1	0	0	1	Article
52772155	Epidemiological Implications of HIV-Hepatitis C Co-Infection in South and Southeast Asia	CURRENT HIV/AIDS REPORTS	4	1	Toll access article	Toll access	4	Liu-ZF	Liu	Zhongfu	Author	1	CHINA-CTR-DIS-CONTROL-&-PREVENT	CHINA-CDC	CHINA-CDC	Government	Government	Government	Government	1	0	0	0	0	0	0	1	0	1	0	0	0	0	0	0	0	0	0	0	0	0	0	0	1	Article
47809413	Epidemiology and Costs of Hypertension-related Disorders	CURRENT PHARMACEUTICAL DESIGN	3	3	Toll access article	Toll access	3	Leone-A	Leone	Aurelio	Author, Reprint Author	3	ROYAL-SOC-PROMOT-HLTH	ROYAL-SOC-PUBL-HLTH	ROYAL-SOC-PUBL-HLTH	Non-profit	Non-profit	Non-profit	Non-profit	1	0	0	0	0	0	0	1	0	0	0	1	0	0	0	0	0	0	0	0	0	0	0	0	1	Review
51060569	Epidemiology of Oral-Cavity and Oropharyngeal Carcinomas Controlling a Tobacco Epidemic While a Human Papillomavirus Epidemic Emerges	OTOLARYNGOLOGIC CLINICS OF NORTH AMERICA	2	2	Toll access article	Toll access	2	Sturgis-EM	Sturgis	Erich M.	Author	2	UNIV-TEXAS-MD-ANDERSON-CANC-CTR	UNIV-TEXAS-HLTH-SCI-CTR (UNIV-HOSP)	UNIV-TEXAS-HLTH-SCI-CTR (UNIV-HOSP)	Hospital	University: Unranked	University-Hospital	Hospital	1	0	0	0	0	0	0	1	0	0	1	0	0	0	0	0	0	0	0	0	0	0	0	0	1	Article
48764303	Epidemiology of burns throughout the World. Part II: Intentional burns in adults	BURNS	1	3	Toll access article	Toll access	1	Peck-MD	Peck	Michael D.	Author, Reprint Author	1	MARICOPA-CTY-GEN-HOSP	MARICOPA-CTY-GEN-HOSP	MARICOPA-CTY-GEN-HOSP	Hospital	Hospital	Hospital	Hospital	1	0	0	0	0	0	0	1	0	0	1	0	0	0	0	0	0	0	0	0	0	0	0	0	1	Review
47369169	Epidemiology of burns throughout the world. Part I: Distribution and risk factors	BURNS	1	3	Toll access article	Toll access	1	Peck-MD	Peck	Michael D.	Author, Reprint Author	1	MARICOPA-CTY-GEN-HOSP	MARICOPA-CTY-GEN-HOSP	MARICOPA-CTY-GEN-HOSP	Hospital	Hospital	Hospital	Hospital	1	0	0	0	0	0	0	1	0	0	1	0	0	0	0	0	0	0	0	0	0	0	0	0	1	Review
53239635	Epilepsy is ubiquitous, but more devastating in the poorer regions of the world. . . or is it?	EPILEPSIA	3	6	Hybrid article	Hybrid	3	Newton-CR	Newton	Charles R.	Author	3	KENYA-GOVT-MED-RES-CTR	KENYA-GOVT-MED-RES-CTR	KENYA-GOVT-MED-RES-CTR	Research institute	Research Institute	Research Institute	Research Institute	1	3000	0	0	0	0	1	0	0	0	0	0	1	0	0	0	0	0	0	0	0	0	1	0	1	Article
49209778	Epilepsy-associated stigma in Bolivia: A community-based study among the Guarani population An International League Against Epilepsy/International Bureau for Epilepsy/World Health Organization Global Campaign Against Epilepsy Regional Project	EPILEPSY & BEHAVIOR	12	7	Green OA article	Green OA	12	Nicoletti-A	Nicoletti	Alessandra	Author, Reprint Author	1	UNIV-CATANIA	UNIV-CATANIA	UNIV-CATANIA	University	University - Rank 501+	University - Rank 501+	University - Rank 501+	1	0	0	0	0	1	0	0	0	0	0	0	0	0	0	0	0	0	0	1	0	1	0	0	1	Article
48280347	Equity in maternal, newborn, and child health interventions in Countdown to 2015: a retrospective review of survey data from 54 countries	LANCET	9	6	Toll access article	Toll access	9	Victora-CG	Victora	Cesar G.	Author	1	UNIV-FED-PELOTAS	UNIV-FED-PELOTAS	UNIV-FED-PELOTAS	University	University: Unranked	University: Unranked	University: Unranked	1	0	0	0	0	0	0	1	0	0	0	0	0	0	0	0	0	0	0	0	1	1	0	0	1	Article
53336232	Equity-Oriented Monitoring in the Context of Universal Health Coverage	PLOS MEDICINE	8	6	Gold OA article (APC)	Gold OA	8	Vega-J	Vega	Jeanette	Author	6	ROCKEFELLER-FDN	ROCKEFELLER-FDN	ROCKEFELLER-FDN	Non-profit	Non-profit	Non-profit	Non-profit	1	2900	0	1	0	0	0	0	0	0	0	1	0	0	0	0	0	0	0	0	0	0	1	0	1	Article
49113134	Essential Factors for the Development of a Residency Global Health Track	CLINICAL PEDIATRICS	5	3	Green OA article	Green OA	4	Wagner-SM	Wagner	Sabrina M.	Author	3	UNIV-WISCONSIN	UNIV-WISCONSIN	UNIV-WISCONSIN	University	University - Rank 026-050	University - Rank 026-050	University - Rank 026-050	1	0	0	0	0	1	0	0	0	0	0	0	0	0	0	1	0	0	0	0	0	1	0	1	0	Article
52868241	Establishing a Program of Global Initiatives for Nursing Education	JOURNAL OF NURSING EDUCATION	5	5	Toll access article	Toll access	5	Larson-EL	Larson	Elaine L.	Author	4	COLUMBIA-UNIV	COLUMBIA-UNIV	COLUMBIA-UNIV	University	University - Rank 001-025	University - Rank 001-025	University - Rank 001-025	1	0	0	0	0	0	0	1	0	0	0	0	0	0	1	0	0	0	0	0	0	1	0	1	0	Article
48458472	Estimated Global Mortality Attributable to Smoke from Landscape Fires	ENVIRONMENTAL HEALTH PERSPECTIVES	9	7	Gold OA article (non-APC)	Gold OA	9	Brauer-M	Brauer	Michael	Author	3	UNIV-BRITISH-COLUMBIA	UNIV-BRITISH-COLUMBIA	UNIV-BRITISH-COLUMBIA	University	University - Rank 026-050	University - Rank 026-050	University - Rank 026-050	1	0	0	0	1	0	0	0	0	0	0	0	0	0	0	1	0	0	0	0	0	1	0	1	0	Article
47318106	Estimated global incidence of Japanese encephalitis: a systematic review	BULLETIN OF THE WORLD HEALTH ORGANIZATION	11	9	Gold OA article (non-APC)	Gold OA	11	Ginsburg-AS	Ginsburg	Amy S.	Author, Reprint Author	1	PATH	PATH	PATH	Non-profit	Non-profit	Non-profit	Non-profit	1	0	0	0	1	0	0	0	0	0	0	1	0	0	0	0	0	0	0	0	0	0	0	0	1	Review
52035060	Estimates of neonatal morbidities and disabilities at regional and global levels for 2010: introduction, methods overview, and relevant findings from the Global Burden of Disease study	PEDIATRIC RESEARCH	8	8	Green OA article	Green OA	8	Lawn-JE	Lawn	Joy E.	Author, Reprint Author	7	LONDON-SCH-HYG-&-TROP-MED	UCL	UCL	University	University - Rank 001-025	University - Rank 001-025	University - Rank 001-025	1	0	0	0	0	1	0	0	0	0	0	0	0	0	1	0	0	0	0	0	0	1	0	1	0	Article
45250294	Estimates of worldwide burden of cancer in 2008: GLOBOCAN 2008	INTERNATIONAL JOURNAL OF CANCER	6	4	Hybrid article	Hybrid	6	Parkin-DM	Parkin	Donald Maxwell	Author	3	UNIV-OXFORD	UNIV-OXFORD	UNIV-OXFORD	University	University - Rank 001-025	University - Rank 001-025	University - Rank 001-025	1	3000	0	0	0	0	1	0	0	0	0	0	0	0	1	0	0	0	0	0	0	1	1	1	0	Article
51849207	Estimating global and regional morbidity from acute bacterial meningitis in children: assessment of the evidence	CROATIAN MEDICAL JOURNAL	6	4	Gold OA article (non-APC)	Gold OA	6	Rudan-I	Rudan	Igor	Author	3	UNIV-EDINBURGH	UNIV-EDINBURGH	UNIV-EDINBURGH	University	University - Rank 026-050	University - Rank 026-050	University - Rank 026-050	1	0	0	0	1	0	0	0	0	0	0	0	0	0	0	1	0	0	0	0	0	1	0	1	0	Article
44665139	Estimating the Global Clinical Burden of Plasmodium falciparum Malaria in 2007	PLOS MEDICINE	7	5	Gold OA article (APC)	Gold OA	7	Snow-RW	Snow	Robert W.	Author	2	UNIV-OXFORD	UNIV-OXFORD	UNIV-OXFORD	University	University - Rank 001-025	University - Rank 001-025	University - Rank 001-025	1	2900	0	1	0	0	0	0	0	0	0	0	0	0	1	0	0	0	0	0	0	1	1	1	0	Article
44739779	Estimating the global distribution and disease burden of intestinal nematode infections: Adding up the numbers - A review	INTERNATIONAL JOURNAL FOR PARASITOLOGY	1	2	Green OA article	Green OA	1	Brooker-S	Brooker	Simon	Author, Reprint Author	1	KENYA-GOVT-MED-RES-CTR	KENYA-GOVT-MED-RES-CTR	KENYA-GOVT-MED-RES-CTR	Research institute	Research Institute	Research Institute	Research Institute	1	0	0	0	0	1	0	0	0	0	0	0	1	0	0	0	0	0	0	0	0	0	0	0	1	Review
52877747	Estimating the impact of unsafe water, sanitation and hygiene on the global burden of disease: evolving and alternative methods	TROPICAL MEDICINE & INTERNATIONAL HEALTH	6	4	Hybrid article	Hybrid	6	Colford-JM	Colford	John M.	Author	4	UNIV-CALIF-BERKELEY	UC-BERKELEY	UC-BERKELEY	University	University - Rank 001-025	University - Rank 001-025	University - Rank 001-025	1	3000	0	0	0	0	1	0	0	0	0	0	0	0	1	0	0	0	0	0	0	1	1	1	0	Article
51849209	Estimating the incidence of colorectal cancer in South East Asia	CROATIAN MEDICAL JOURNAL	4	2	Gold OA article (non-APC)	Gold OA	4	Theodoratou-E	Theodoratou	Evropi	Author, Reprint Author	1	UNIV-EDINBURGH	UNIV-EDINBURGH	UNIV-EDINBURGH	University	University - Rank 026-050	University - Rank 026-050	University - Rank 026-050	1	0	0	0	1	0	0	0	0	0	0	0	0	0	0	1	0	0	0	0	0	1	0	1	0	Article
53486061	Estimation of daily risk of neonatal death, including the day of birth, in 186 countries in 2013: a vital-registration and modelling-based study	LANCET GLOBAL HEALTH	3	1	Gold OA article (APC)	Gold OA	3	Lawn-JE	Lawn	Joy E.	Author	1	LONDON-SCH-HYG-&-TROP-MED	UCL	UCL	University	University - Rank 001-025	University - Rank 001-025	University - Rank 001-025	1	5000	0	1	0	0	0	0	0	0	0	0	0	0	1	0	0	0	0	0	0	1	1	1	0	Article
45923817	Ethics and Best Practice Guidelines for Training Experiences in Global Health	AMERICAN JOURNAL OF TROPICAL MEDICINE AND HYGIENE	2	19	Green OA article	Green OA	2	Sugarman-J	Sugarman	Jeremy	Author	2	JOHNS-HOPKINS-UNIV	JOHNS-HOPKINS-UNIV	JOHNS-HOPKINS-UNIV	University	University - Rank 001-025	University - Rank 001-025	University - Rank 001-025	1	0	0	0	0	1	0	0	0	0	0	0	0	0	1	0	0	0	0	0	0	1	0	1	0	Article
47657869	Ethics in practice: the state of the debate on promoting the social value of global health research in resource poor settings particularly Africa	BMC MEDICAL ETHICS	4	3	Gold OA article (APC)	Gold OA	4	English-MC	English	Michael C.	Author	1	KEMRI-WELLCOME-TRUST-RES-PROGRAMME	KEMRI-WELLCOME-TRUST-RES-PROGRAMME	KEMRI-WELLCOME-TRUST-RES-PROGRAMME	Non-profit	Non-profit	Non-profit	Non-profit	1	2145	0	1	0	0	0	0	0	0	0	1	0	0	0	0	0	0	0	0	0	0	1	0	1	Article
47031615	Evaluation of the World Health Organization Global Measles and Rubella Quality Assurance Program, 2001-2008	JOURNAL OF INFECTIOUS DISEASES	7	2	Hybrid article	Hybrid	7	Kelly-H	Kelly	Heath	Author	1	VICTORIAN-INFECT-DIS-REFERENCE-LAB	VICTORIAN-INFECT-DIS-REFERENCE-LAB	VICTORIAN-INFECT-DIS-REFERENCE-LAB	Research institute	Research Institute	Research Institute	Research Institute	1	3500	0	0	0	0	1	0	0	0	0	0	1	0	0	0	0	0	0	0	0	0	1	0	1	Article
52097827	Evidence and AIDS activism: HIV scale-up and the contemporary politics of knowledge in global public health	GLOBAL PUBLIC HEALTH	1	2	Green OA article	Green OA	1	Colvin-CJ	Colvin	Christopher J.	Author, Reprint Author	1	UNIV-CAPE-TOWN	UNIV-CAPE-TOWN	UNIV-CAPE-TOWN	University	University - Rank 101-200	University - Rank 101-200	University - Rank 101-200	1	0	0	0	0	1	0	0	0	0	0	0	0	0	0	0	0	1	0	0	0	1	0	0	1	Article
48835882	Evidence-based intervention in physical activity: lessons from around the world	LANCET	8	10	Toll access article	Toll access	8	Brownson-RC	Brownson	Ross C.	Author	2	WASHINGTON-UNIV	WUSTL	WUSTL	University	University - Rank 051-100	University - Rank 51-100	University - Rank 051-100	1	0	0	0	0	0	0	1	0	0	0	0	0	0	0	0	1	0	0	0	0	1	0	0	1	Article
49552308	Evidence-based medicine and the governance of pandemic influenza	GLOBAL PUBLIC HEALTH	1	2	Toll access article	Toll access	1	KamradtScott-A	Kamradt-Scott	Adam	Author, Reprint Author	1	UNIV-SYDNEY	UNIV-SYDNEY	UNIV-SYDNEY	University	University - Rank 051-100	University - Rank 51-100	University - Rank 051-100	1	0	0	0	0	0	0	1	0	0	0	0	0	0	0	0	1	0	0	0	0	1	0	0	1	Article
52627547	Evolving Norms at the Intersection of Health and Trade	JOURNAL OF HEALTH POLITICS POLICY AND LAW	2	3	Green OA article	Green OA	2	Lencucha-R	Lencucha	Raphael	Author	3	MCGILL-UNIV	MCGILL-UNIV	MCGILL-UNIV	University	University - Rank 026-050	University - Rank 026-050	University - Rank 026-050	1	0	0	0	0	1	0	0	0	0	0	0	0	0	0	1	0	0	0	0	0	1	0	1	0	Article
44587443	Evolving public health approaches to the global challenge of foodborne infections	INTERNATIONAL JOURNAL OF FOOD MICROBIOLOGY	5	3	Toll access article	Toll access	5	Stein-CE	Stein	C. E.	Author	3	WHO	WHO	WHO	Non-profit	Non-profit	Non-profit	Non-profit	1	0	0	0	0	0	0	1	0	0	0	1	0	0	0	0	0	0	0	0	0	0	0	0	1	Article
46025201	Evolving values in ethics and global health research	GLOBAL PUBLIC HEALTH	4	8	Toll access article	Toll access	4	Lavery-JV	Lavery	J. V.	Author	5	ST-MICHAELS-HOSP-TORONTO	ST-MICHAELS-HOSP-TORONTO	ST-MICHAELS-HOSP-TORONTO	Hospital	University - Rank 001-025	University-Hospital	Hospital	1	0	0	0	0	0	0	1	0	0	1	0	0	0	0	0	0	0	0	0	0	0	0	0	1	Article
52370153	Examining self-rated health of young Central and Eastern Europeans in the context of other world regions	EUROPEAN JOURNAL OF PUBLIC HEALTH	4	2	Hybrid article	Hybrid	4	Kunst-AE	Kunst	Anton E.	Author	1	UNIV-AMSTERDAM	UNIV-AMSTERDAM	UNIV-AMSTERDAM	University	University - Rank 051-100	University - Rank 51-100	University - Rank 051-100	1	2400	0	0	0	0	1	0	0	0	0	0	0	0	0	0	1	0	0	0	0	1	1	0	1	Article
47319956	Excess weight and economic, political, and social factors: an international ecological analysis	CADERNOS DE SAUDE PUBLICA	5	3	Gold OA article (non-APC)	Gold OA	5	SerraMajem-L	Serra-Majem	Lluis	Author	3	UNIV-LAS-PALMAS-GRAN-CANARIA	UNIV-LAS-PALMAS-GRAN-CANARIA	UNIV-LAS-PALMAS-GRAN-CANARIA	University	University: Unranked	University: Unranked	University: Unranked	1	0	0	0	1	0	0	0	0	0	0	0	0	0	0	0	0	0	0	0	1	1	0	0	1	Article
45191826	Expanded partnerships between medical faculty and medical students: Developing a Global Health curriculum as an example of 'student-led learning' at the University of Queensland, Australia	MEDICAL TEACHER	2	1	Toll access article	Toll access	1	Merridew-N	Merridew	Nancy	Author, Reprint Author	1	UNIV-QUEENSLAND	UNIV-QUEENSLAND	UNIV-QUEENSLAND	University	University - Rank 051-100	University - Rank 51-100	University - Rank 051-100	1	0	0	0	0	0	0	1	0	0	0	0	0	0	0	0	1	0	0	0	0	1	0	0	1	Article
47031614	Expansion of the Global Measles and Rubella Laboratory Network 2005-09	JOURNAL OF INFECTIOUS DISEASES	17	12	Hybrid article	Hybrid	16	Bellini-WJ	Bellini	William J.	Author	2	CTR-DIS-CONTROL-&-PREVENT	CDC	CDC	Government	Government	Government	Government	1	3500	0	0	0	0	1	0	0	1	0	0	0	0	0	0	0	0	0	0	0	0	1	0	1	Article
49548165	Exploring the relationship between population density and maternal health coverage	BMC HEALTH SERVICES RESEARCH	4	2	Gold OA article (APC)	Gold OA	4	Zhang-R	Zhang	Raymond	Author	2	NORTHWESTERN-UNIV	NORTHWESTERN-UNIV	NORTHWESTERN-UNIV	University	University - Rank 001-025	University - Rank 001-025	University - Rank 001-025	1	2145	0	1	0	0	0	0	0	0	0	0	0	0	1	0	0	0	0	0	0	1	1	1	0	Article
51263973	Exploring the utility of institutional theory in analysing international health agency stasis and change	HEALTH POLICY AND PLANNING	1	1	Hybrid article	Hybrid	1	Gomez-EJ	Gomez	Eduardo J.	Author, Reprint Author	1	RUTGERS-STATE-UNIV	RUTGERS-STATE-UNIV	RUTGERS-STATE-UNIV	University	University - Rank 101-200	University - Rank 101-200	University - Rank 101-200	1	2400	0	0	0	0	1	0	0	0	0	0	0	0	0	0	0	1	0	0	0	1	1	0	1	Article
47940223	Extent of illicit drug use and dependence, and their contribution to the global burden of disease	LANCET	2	5	Green OA article	Green OA	2	Hall-W	Hall	Wayne	Author	4	UNIV-QUEENSLAND	UNIV-QUEENSLAND	UNIV-QUEENSLAND	University	University - Rank 051-100	University - Rank 51-100	University - Rank 051-100	1	0	0	0	0	1	0	0	0	0	0	0	0	0	0	0	1	0	0	0	0	1	0	0	1	Article
52546355	FADB: a food additive molecular database for in silico screening in food toxicology	FOOD ADDITIVES AND CONTAMINANTS PART A-CHEMISTRY ANALYSIS CONTROL EXPOSURE & RISK ASSESSMENT	3	2	Toll access article	Toll access	3	Cozzini-P	Cozzini	Pietro	Author, Reprint Author	1	UNIV-PARMA	UNIV-PARMA	UNIV-PARMA	University	University - Rank 501+	University - Rank 501+	University - Rank 501+	1	0	0	0	0	0	0	1	0	0	0	0	0	0	0	0	0	0	0	1	0	1	0	0	1	Article
49627846	FDI Vision 2020: shaping the future of oral health	INTERNATIONAL DENTAL JOURNAL	9	7	Green OA article	Green OA	9	Severin-T	Severin	Tania	Author, Reprint Author	1	FDI-WORLD-DENT-FEDERAT	FDI-WORLD-DENT-FEDERAT	FDI-WORLD-DENT-FEDERAT	Scientific association	Scientific association	Scientific association	Scientific association	1	0	0	0	0	1	0	0	0	0	0	0	0	1	0	0	0	0	0	0	0	0	0	0	1	Article
47360741	FEDERALISM AND DECENTRALIZATION: IMPACT ON INTERNATIONAL AND BRAZILIAN HEALTH POLICIES	INTERNATIONAL JOURNAL OF HEALTH SERVICES	3	4	Toll access article	Toll access	3	Lima-KC	Lima	Kenio Costa	Author	3	UNIV-FED-RIO-GRANDE-DO-NORTE	UNIV-FED-RIO-GRANDE-DO-NORTE	UNIV-FED-RIO-GRANDE-DO-NORTE	University	University - Rank 501+	University - Rank 501+	University - Rank 501+	1	0	0	0	0	0	0	1	0	0	0	0	0	0	0	0	0	0	0	1	0	1	0	0	1	Article
49241349	FIGO Saving Mothers and Newborns Initiative 2006-2011	INTERNATIONAL JOURNAL OF GYNECOLOGY & OBSTETRICS	2	3	Toll access article	Toll access	2	Grellier-R	Grellier	Rachel	Author	3	OPT-CONSULTANCY-SERV	OPT-CONSULTANCY-SERV	OPT-CONSULTANCY-SERV	Company	Company	Company	Company	1	0	0	0	0	0	0	1	1	0	0	0	0	0	0	0	0	0	0	0	0	0	0	0	1	Article
53652362	Facilitating health and wellbeing is "everybody's role": youth perspectives from Vanuatu on health and the post-2015 sustainable development goal agenda	INTERNATIONAL JOURNAL FOR EQUITY IN HEALTH	7	3	Gold OA article (APC)	Gold OA	7	Hill-PS	Hill	Peter S.	Author	1	UNIV-QUEENSLAND	UNIV-QUEENSLAND	UNIV-QUEENSLAND	University	University - Rank 051-100	University - Rank 51-100	University - Rank 051-100	1	2220	0	1	0	0	0	0	0	0	0	0	0	0	0	0	1	0	0	0	0	1	1	0	1	Article
48609117	Facilitative governance: Transforming global health through complexity theory	GLOBAL PUBLIC HEALTH	1	2	Toll access article	Toll access	1	Haffeld-J	Haffeld	Just	Author, Reprint Author	1	UNIV-OSLO	UNIV-OSLO	UNIV-OSLO	University	University - Rank 101-200	University - Rank 101-200	University - Rank 101-200	1	0	0	0	0	0	0	1	0	0	0	0	0	0	0	0	0	1	0	0	0	1	0	0	1	Article
51255036	Factors affecting the HIV/AIDS epidemic: an ecological analysis of global data	AFRICAN HEALTH SCIENCES	2	3	Gold OA article (non-APC)	Gold OA	2	Shitan-M	Shitan	M.	Author	1	UNIV-PUTRA-MALAYSIA	UNIV-PUTRA-MALAYSIA	UNIV-PUTRA-MALAYSIA	University	University - Rank 501+	University - Rank 501+	University - Rank 501+	1	0	0	0	1	0	0	0	0	0	0	0	0	0	0	0	0	0	0	1	0	1	0	0	1	Article
44904266	Factors influencing performance of Global Fund-supported tuberculosis grants	INTERNATIONAL JOURNAL OF TUBERCULOSIS AND LUNG DISEASE	6	3	Green OA article	Green OA	6	Atun-R	Atun	R.	Author	1	GLOBAL-FUND-FIGHT-AIDS-TB-&-MALARIA	GLOBAL-FUND-FIGHT-AIDS-TB-&-MALARIA	GLOBAL-FUND-FIGHT-AIDS-TB-&-MALARIA	Non-profit	Non-profit	Non-profit	Non-profit	1	0	0	0	0	1	0	0	0	0	0	1	0	0	0	0	0	0	0	0	0	0	0	0	1	Article
50682841	Factors that influence current tuberculosis epidemiology	EUROPEAN SPINE JOURNAL	7	3	Green OA article	Green OA	7	Cayla-JA	Cayla	Joan A.	Author	1	PUBL-HLTH-AGCY-BARCELONA	PUBL-HLTH-AGCY-BARCELONA	PUBL-HLTH-AGCY-BARCELONA	Government	Government	Government	Government	1	0	0	0	0	1	0	0	0	1	0	0	0	0	0	0	0	0	0	0	0	0	0	0	1	Review
53661998	Family planning since ICPD - how far have we progressed?	CONTRACEPTION	2	2	Green OA article	Green OA	2	Maggwa-B	Maggwa	Baker	Author	1	FHI-360	FHI-360	FHI-360	Non-profit	Non-profit	Non-profit	Non-profit	1	0	0	0	0	1	0	0	0	0	0	1	0	0	0	0	0	0	0	0	0	0	0	0	1	Review
44992006	Feeding the world healthily: the challenge of measuring the effects of agriculture on health	PHILOSOPHICAL TRANSACTIONS OF THE ROYAL SOCIETY B-BIOLOGICAL SCIENCES	8	5	Green OA article	Green OA	8	Waage-J	Waage	Jeff	Author	2	LONDON-INT-DEV-CTR	LONDON-INT-DEV-CTR	LONDON-INT-DEV-CTR	Research institute	Research Institute	Research Institute	Research Institute	1	0	0	0	0	1	0	0	0	0	0	0	1	0	0	0	0	0	0	0	0	0	0	0	1	Review
50058567	Fifteen years of the tropEd Masters in International Health programme: what has it delivered? Results of an alumni survey of masters students in international health	TROPICAL MEDICINE & INTERNATIONAL HEALTH	6	3	Hybrid article	Hybrid	6	Peterhans-B	Peterhans	B.	Author	2	UNIV-BASEL	UNIV-BASEL	UNIV-BASEL	University	University - Rank 051-100	University - Rank 51-100	University - Rank 051-100	1	3000	0	0	0	0	1	0	0	0	0	0	0	0	0	0	1	0	0	0	0	1	1	0	1	Article
45250295	Fifty years of cancer incidence: CI5 I-IX	INTERNATIONAL JOURNAL OF CANCER	7	4	Hybrid article	Hybrid	7	Forman-D	Forman	David	Author	3	INT-AGCY-RES-CANC	INT-AGCY-RES-CANC	INT-AGCY-RES-CANC	Research institute	Research Institute	Research Institute	Research Institute	1	3000	0	0	0	0	1	0	0	0	0	0	1	0	0	0	0	0	0	0	0	0	1	0	1	Article
49819110	Financing and organisation of Veterinary Services	REVUE SCIENTIFIQUE ET TECHNIQUE DE L OFFICE INTERNATIONAL DES EPIZOOTIES	2	2	Toll access article	Toll access	2	Barcos-L	Barcos	L.	Author	2	WORLD-ORG-ANIM-HLTH-OIE	WORLD-ORG-ANIM-HLTH	WORLD-ORG-ANIM-HLTH	Non-profit	Non-profit	Non-profit	Non-profit	1	0	0	0	0	0	0	1	0	0	0	1	0	0	0	0	0	0	0	0	0	0	0	0	1	Article
49819109	Financing for public Veterinary Services to ensure that they meet international standards	REVUE SCIENTIFIQUE ET TECHNIQUE DE L OFFICE INTERNATIONAL DES EPIZOOTIES	2	1	Toll access article	Toll access	2	Zussman-D	Zussman	D.	Author	1	UNIV-OTTAWA	UNIV-OTTAWA	UNIV-OTTAWA	University	University - Rank 201-500	University - Rank 201-500	University - Rank 201-500	1	0	0	0	0	0	0	1	0	0	0	0	0	0	0	0	0	0	1	0	0	1	0	0	1	Article
53195489	Food allergy: Diagnosis, management & emerging therapies	INDIAN JOURNAL OF MEDICAL RESEARCH	1	2	Gold OA article (non-APC)	Gold OA	1	Robison-RG	Robison	Rachel Glick	Author, Reprint Author	1	ANN-&-ROBERT-H-LURIE-CHILDRENS-HOSP-CHICAGO	ANN-&-ROBERT-H-LURIE-CHILDRENS-HOSP-CHICAGO	ANN-&-ROBERT-H-LURIE-CHILDRENS-HOSP-CHICAGO	Hospital	University - Rank 001-025	University-Hospital	Hospital	1	0	0	0	1	0	0	0	0	0	1	0	0	0	0	0	0	0	0	0	0	0	0	0	1	Review
48811274	Food systems: New-Ruralism versus New-Urbanism	JOURNAL OF THE SCIENCE OF FOOD AND AGRICULTURE	4	2	Green OA article	Green OA	4	Witlox-F	Witlox	Frank	Author	1	UNIV-GHENT	UNIV-GHENT	UNIV-GHENT	University	University - Rank 101-200	University - Rank 101-200	University - Rank 101-200	1	0	0	0	0	1	0	0	0	0	0	0	0	0	0	0	0	1	0	0	0	1	0	0	1	Article
51541196	Forgotten, not neglected: viral hepatitis in resource-limited settings, recall for action	LIVER INTERNATIONAL	4	4	Toll access article	Toll access	4	Dusheiko-G	Dusheiko	Geoffrey	Author	3	ROYAL-FREE-HOSP	ROYAL-FREE-HOSP	ROYAL-FREE-HOSP	Hospital	University - Rank 001-025	University-Hospital	Hospital	1	0	0	0	0	0	0	1	0	0	1	0	0	0	0	0	0	0	0	0	0	0	0	0	1	Article
49552313	Framing and global health governance: Key findings	GLOBAL PUBLIC HEALTH	2	3	Green OA article	Green OA	2	Lee-K	Lee	Kelley	Author	2	LONDON-SCH-HYG-&-TROP-MED	UCL	UCL	University	University - Rank 001-025	University - Rank 001-025	University - Rank 001-025	1	0	0	0	0	1	0	0	0	0	0	0	0	0	1	0	0	0	0	0	0	1	0	1	0	Article
48732620	From Online Randomized Controlled Trials to Participant Preference Studies: Morphing the San Francisco Stop Smoking Site into a Worldwide Smoking Cessation Resource	JOURNAL OF MEDICAL INTERNET RESEARCH	5	3	Gold OA article (APC)	Gold OA	5	PerezStable-EJ	Perez-Stable	Eliseo J.	Author	1	UNIV-CALIF-SAN-FRANCISCO	UCSF	UCSF	University	University - Rank 001-025	University - Rank 001-025	University - Rank 001-025	1	2500	0	1	0	0	0	0	0	0	0	0	0	0	1	0	0	0	0	0	0	1	1	1	0	Article
47431398	From Port-of-Spain Summit to United Nations High Level Meeting CARICOM and the Global Non-communicable Disease Agenda	WEST INDIAN MEDICAL JOURNAL	2	2	Gold OA article (non-APC)	Gold OA	2	Hospedales-CJ	Hospedales	C. J.	Author	2	WHO	WHO	WHO	Non-profit	Non-profit	Non-profit	Non-profit	1	0	0	0	1	0	0	0	0	0	0	1	0	0	0	0	0	0	0	0	0	0	0	0	1	Article
47238568	From Treating Complex Coronary Artery Disease to Promoting Cardiovascular Health: Therapeutic Transitions and Challenges, 2010-2020	CLINICAL PHARMACOLOGY & THERAPEUTICS	2	3	Toll access article	Toll access	2	Fuster-V	Fuster	V.	Author, Reprint Author	1	MT-SINAI-SCH-MED	MT-SINAI-MED-CTR	MT-SINAI-MED-CTR	Hospital	University - Rank 026-050	University-Hospital	Hospital	1	0	0	0	0	0	0	1	0	0	1	0	0	0	0	0	0	0	0	0	0	0	0	0	1	Article
53769323	From international health to global health: how to foster a better dialogue between empirical and normative disciplines	BMC INTERNATIONAL HEALTH AND HUMAN RIGHTS	1	2	Gold OA article (APC)	Gold OA	1	Ooms-G	Ooms	Gorik	Author, Reprint Author	1	INST-TROP-MED	INST-TROP-MED	INST-TROP-MED	Research institute	Research Institute	Research Institute	Research Institute	1	2145	0	1	0	0	0	0	0	0	0	0	1	0	0	0	0	0	0	0	0	0	1	0	1	Article
47659635	From population control to AIDS: Conceptualising and critiquing the global crisis model	GLOBAL PUBLIC HEALTH	2	1	Toll access article	Toll access	2	Hendrixson-A	Hendrixson	Anne	Author	1	CLARK-UNIV	CLARK-UNIV	CLARK-UNIV	University	University - Rank 201-500	University - Rank 201-500	University - Rank 201-500	1	0	0	0	0	0	0	1	0	0	0	0	0	0	0	0	0	0	1	0	0	1	0	0	1	Article
48626121	From the Earth Summit to Rio+20: integration of health and sustainable development	LANCET	4	5	Green OA article	Green OA	4	Dora-C	Dora	Carlos	Author	5	WHO	WHO	WHO	Non-profit	Non-profit	Non-profit	Non-profit	1	0	0	0	0	1	0	0	0	0	0	1	0	0	0	0	0	0	0	0	0	0	0	0	1	Review
47363339	Future Infectious Disease Threats to Europe	AMERICAN JOURNAL OF PUBLIC HEALTH	2	1	Green OA article	Green OA	2	Semenza-JC	Semenza	Jan C.	Author, Reprint Author	1	EUROPEAN-CTR-DIS-PREVENT-&-CONTROL	EUROPEAN-CTR-DIS-PREVENT-&-CONTROL	EUROPEAN-CTR-DIS-PREVENT-&-CONTROL	Government	Government	Government	Government	1	0	0	0	0	1	0	0	0	1	0	0	0	0	0	0	0	0	0	0	0	0	0	0	1	Article
48980888	GLOBAL HEALTH AND NEONATAL NURSING: A PERSONAL JOURNEY	MCN-THE AMERICAN JOURNAL OF MATERNAL-CHILD NURSING	2	2	Toll access article	Toll access	2	Boykova-M	Boykova	Marina	Author	2	UNIV-OKLAHOMA	UNIV-OKLAHOMA	UNIV-OKLAHOMA	University	University - Rank 201-500	University - Rank 201-500	University - Rank 201-500	1	0	0	0	0	0	0	1	0	0	0	0	0	0	0	0	0	0	1	0	0	1	0	0	1	Article
51036184	GLOBAL HEALTH Behavioral and Dietary Risk Factors for Noncommunicable Diseases	NEW ENGLAND JOURNAL OF MEDICINE	2	1	Delayed OA article	Delayed OA	2	Riboli-E	Riboli	Elio	Author	1	UNIV-LONDON-IMPERIAL-COLL-SCI-TECHNOL-&-MED	UNIV-LONDON-IMPERIAL-COLL-SCI-TECHNOL-&-MED	UNIV-LONDON-IMPERIAL-COLL-SCI-TECHNOL-&-MED	University	University - Rank 001-025	University - Rank 001-025	University - Rank 001-025	1	0	1	0	0	0	0	0	0	0	0	0	0	0	1	0	0	0	0	0	0	1	0	1	0	Review
48867210	GLOBAL HEALTH COMPETENCIES FOR NURSES IN THE AMERICAS	JOURNAL OF PROFESSIONAL NURSING	9	5	Green OA article	Green OA	8	Mendes-I	Mendes	Isabel	Author	5	UNIV-SAO-PAULO	UNIV-SAO-PAULO	UNIV-SAO-PAULO	University	University - Rank 201-500	University - Rank 201-500	University - Rank 201-500	1	0	0	0	0	1	0	0	0	0	0	0	0	0	0	0	0	0	1	0	0	1	0	0	1	Article
52810621	GLOBAL HEALTH EDUCATION IN EMERGENCY MEDICINE RESIDENCY PROGRAMS	JOURNAL OF EMERGENCY MEDICINE	3	2	Toll access article	Toll access	3	Hahn-S	Hahn	Sigrid	Author	1	ICAHN-SCH-MED-MT-SINAI	ICAHN-SCH-MED-MT-SINAI	ICAHN-SCH-MED-MT-SINAI	University	University: Unranked	University: Unranked	University: Unranked	1	0	0	0	0	0	0	1	0	0	0	0	0	0	0	0	0	0	0	0	1	1	0	0	1	Article
50120042	GLOBAL HEALTH Governance Challenges in Global Health	NEW ENGLAND JOURNAL OF MEDICINE	2	3	Delayed OA article	Delayed OA	1	Frenk-J	Frenk	Julio	Author, Reprint Author	1	HARVARD-UNIV	HARVARD-UNIV	HARVARD-UNIV	University	University - Rank 001-025	University - Rank 001-025	University - Rank 001-025	1	0	1	0	0	0	0	0	0	0	0	0	0	0	1	0	0	0	0	0	0	1	0	1	0	Review
50723264	GLOBAL HEALTH Mental Health and the Global Agenda	NEW ENGLAND JOURNAL OF MEDICINE	2	3	Delayed OA article	Delayed OA	2	Kleinman-A	Kleinman	Arthur	Author, Reprint Author	1	HARVARD-UNIV	HARVARD-UNIV	HARVARD-UNIV	University	University - Rank 001-025	University - Rank 001-025	University - Rank 001-025	1	0	1	0	0	0	0	0	0	0	0	0	0	0	1	0	0	0	0	0	0	1	0	1	0	Review
53249177	GLOBAL HEALTH SECURITY AGENDA AND THE INTERNATIONAL HEALTH REGULATIONS: MOVING FORWARD	BIOSECURITY AND BIOTERRORISM-BIODEFENSE STRATEGY PRACTICE AND SCIENCE	4	1	Green OA article	Green OA	4	Fischer-JE	Fischer	Julie E.	Author	1	GEORGE-WASHINGTON-UNIV	GEORGE-WASHINGTON-UNIV	GEORGE-WASHINGTON-UNIV	University	University - Rank 201-500	University - Rank 201-500	University - Rank 201-500	1	0	0	0	0	1	0	0	0	0	0	0	0	0	0	0	0	0	1	0	0	1	0	0	1	Article
43945450	GLOBAL NETWORKING FOR BIODOSIMETRY LABORATORY CAPACITY SURGE IN RADIATION EMERGENCIES	HEALTH PHYSICS	3	1	Green OA article	Green OA	3	Carr-Z	Carr	Zhanat	Author, Reprint Author	1	WHO	WHO	WHO	Non-profit	Non-profit	Non-profit	Non-profit	1	0	0	0	0	1	0	0	0	0	0	1	0	0	0	0	0	0	0	0	0	0	0	0	1	Article
48854612	GLOBAL SOLIDARITY, MIGRATION AND GLOBAL HEALTH INEQUITY	BIOETHICS	3	3	Green OA article	Green OA	3	Chung-R	Chung	Ryoa	Author	3	UNIV-MONTREAL	UNIV-MONTREAL	UNIV-MONTREAL	University	University - Rank 101-200	University - Rank 101-200	University - Rank 101-200	1	0	0	0	0	1	0	0	0	0	0	0	0	0	0	0	0	1	0	0	0	1	0	0	1	Article
46149658	Gender differences in health: results from SHARE, ELSA and HRS	EUROPEAN JOURNAL OF PUBLIC HEALTH	3	2	Green OA article	Green OA	3	SoleAuro-A	Sole-Auro	Aida	Author	2	UNIV-BARCELONA	UNIV-BARCELONA	UNIV-BARCELONA	University	University - Rank 201-500	University - Rank 201-500	University - Rank 201-500	1	0	0	0	0	1	0	0	0	0	0	0	0	0	0	0	0	0	1	0	0	1	0	0	1	Article
50859958	Gender gaps in life expectancy: generalized trends and negative associations with development indices in OECD countries	EUROPEAN JOURNAL OF PUBLIC HEALTH	6	3	Hybrid article	Hybrid	6	Tamashiro-H	Tamashiro	Hiko	Author, Reprint Author	1	HOKKAIDO-UNIV	HOKKAIDO-UNIV	HOKKAIDO-UNIV	University	University - Rank 201-500	University - Rank 201-500	University - Rank 201-500	1	2400	0	0	0	0	1	0	0	0	0	0	0	0	0	0	0	0	1	0	0	1	1	0	1	Article
50616945	Getting the Job Done: Analysis of the Impact and Effectiveness of the SmileTrain Program in Alleviating the Global Burden of Cleft Disease	WORLD JOURNAL OF SURGERY	1	1	Green OA article	Green OA	1	Poenaru-D	Poenaru	D.	Author, Reprint Author	1	BETHANYKIDS-KIJABE-HOSP	BETHANYKIDS-KIJABE-HOSP	BETHANYKIDS-KIJABE-HOSP	Hospital	Hospital	Hospital	Hospital	1	0	0	0	0	1	0	0	0	0	1	0	0	0	0	0	0	0	0	0	0	0	0	0	1	Article
53663230	Global Agenda, Local Health: Including Concepts of Health Security in Preparedness Programs at the Jurisdictional Level	BIOSECURITY AND BIOTERRORISM-BIODEFENSE STRATEGY PRACTICE AND SCIENCE	1	1	Toll access article	Toll access	1	Eby-C	Eby	Chas	Author, Reprint Author	1	MARYLAND-DEPT-HLTH-&-MENTAL-HYG	MARYLAND-DEPT-HLTH-&-MENTAL-HYG	MARYLAND-DEPT-HLTH-&-MENTAL-HYG	Government	Government	Government	Government	1	0	0	0	0	0	0	1	0	1	0	0	0	0	0	0	0	0	0	0	0	0	0	0	1	Article
46649944	Global Burden of Disease estimates of depression - how reliable is the epidemiological evidence?	JOURNAL OF THE ROYAL SOCIETY OF MEDICINE	3	1	Green OA article	Green OA	3	Manners-R	Manners	Rachel	Author	1	UNIV-EDINBURGH	UNIV-EDINBURGH	UNIV-EDINBURGH	University	University - Rank 026-050	University - Rank 026-050	University - Rank 026-050	1	0	0	0	0	1	0	0	0	0	0	0	0	0	0	1	0	0	0	0	0	1	0	1	0	Article
52272227	Global Burden of Disease, Injury and Risk Factor Study 2010: Its Policy Implications for China	BIOMEDICAL AND ENVIRONMENTAL SCIENCES	6	3	Hybrid article	Hybrid	6	Zhu-YL	Zhu Yu Ling		Author	2	CHINA-CDC	CHINA-CDC	CHINA-CDC	Government	Government	Government	Government	1	3000	0	0	0	0	1	0	0	1	0	0	0	0	0	0	0	0	0	0	0	0	1	0	1	Article
49407568	Global Burden of Human Brucellosis: A Systematic Review of Disease Frequency	PLOS NEGLECTED TROPICAL DISEASES	5	2	Gold OA article (APC)	Gold OA	5	Zinsstag-J	Zinsstag	Jakob	Author, Reprint Author	1	SWISS-TROP-&-PUBL-HLTH-INST	SWISS-TROP-&-PUBL-HLTH-INST	SWISS-TROP-&-PUBL-HLTH-INST	Research institute	Research Institute	Research Institute	Research Institute	1	2250	0	1	0	0	0	0	0	0	0	0	1	0	0	0	0	0	0	0	0	0	1	0	1	Article
50635025	Global Burden of Oral Conditions in 1990-2010: A Systematic Analysis	JOURNAL OF DENTAL RESEARCH	7	4	Green OA article	Green OA	7	Murray-CJL	Murray	C. J. L.	Author	2	UNIV-WASHINGTON	UNIV-WASHINGTON	UNIV-WASHINGTON	University	University - Rank 026-050	University - Rank 026-050	University - Rank 026-050	1	0	0	0	0	1	0	0	0	0	0	0	0	0	0	1	0	0	0	0	0	1	0	1	0	Article
53459718	Global Burden of Severe Periodontitis in 1990-2010: A Systematic Review and Metaregression	JOURNAL OF DENTAL RESEARCH	6	4	Green OA article	Green OA	6	Marcenes-W	Marcenes	W.	Author, Reprint Author	4	QUEEN-MARY-UNIV-LONDON	QUEEN-MARY-UNIV-LONDON	QUEEN-MARY-UNIV-LONDON	University	University - Rank 101-200	University - Rank 101-200	University - Rank 101-200	1	0	0	0	0	1	0	0	0	0	0	0	0	0	0	0	0	1	0	0	0	1	0	0	1	Review
52836488	Global Burden of Severe Tooth Loss: A Systematic Review and Meta-analysis	JOURNAL OF DENTAL RESEARCH	6	6	Green OA article	Green OA	6	Marcenes-W	Marcenes	W.	Author, Reprint Author	6	QUEEN-MARY-UNIV-LONDON	QUEEN-MARY-UNIV-LONDON	QUEEN-MARY-UNIV-LONDON	University	University - Rank 101-200	University - Rank 101-200	University - Rank 101-200	1	0	0	0	0	1	0	0	0	0	0	0	0	0	0	0	0	1	0	0	0	1	0	0	1	Review
47168869	Global Cardiovascular Health	JOURNAL OF THE AMERICAN COLLEGE OF CARDIOLOGY	3	3	Hybrid article	Hybrid	3	Vedanthan-R	Vedanthan	Rajesh	Author	1	MT-SINAI-MED-CTR	MT-SINAI-MED-CTR	MT-SINAI-MED-CTR	Hospital	University - Rank 026-050	University-Hospital	Hospital	1	3000	0	0	0	0	1	0	0	0	1	0	0	0	0	0	0	0	0	0	0	0	1	0	1	Article
48876879	Global Cardiovascular Health Promotion and Disease Prevention 2011 and Beyond	CIRCULATION	2	2	Hybrid article	Hybrid	2	Dunbar-SB	Dunbar	Sandra B.	Author	2	EMORY-UNIV	EMORY-UNIV	EMORY-UNIV	University	University - Rank 051-100	University - Rank 51-100	University - Rank 051-100	1	4600	0	0	0	0	1	0	0	0	0	0	0	0	0	0	1	0	0	0	0	1	1	0	1	Article
49595630	Global Cardiovascular Risk Management in Primary Prevention	CURRENT VASCULAR PHARMACOLOGY	2	2	Toll access article	Toll access	1	Volpe-M	Volpe	Massimo	Author, Reprint Author	1	UNIV-ROMA-LA-SAPIENZA	UNIV-ROMA-LA-SAPIENZA	UNIV-ROMA-LA-SAPIENZA	University	University - Rank 201-500	University - Rank 201-500	University - Rank 201-500	1	0	0	0	0	0	0	1	0	0	0	0	0	0	0	0	0	0	1	0	0	1	0	0	1	Article
53734322	Global Challenges, Efforts, and Controversies in Neonatal Care	CLINICS IN PERINATOLOGY	5	4	Toll access article	Toll access	5	OCallahan-C	O'Callahan	Cliff	Author	4	MIDDLESEX-HOSP	MIDDLESEX-HOSP	MIDDLESEX-HOSP	Hospital	Hospital	Hospital	Hospital	1	0	0	0	0	0	0	1	0	0	1	0	0	0	0	0	0	0	0	0	0	0	0	0	1	Article
44203150	Global Chronic Disease Research Training for Fellows Perspectives, Challenges, and Opportunities	CIRCULATION	2	2	Green OA article	Green OA	2	Huffman-MD	Huffman	Mark D.	Author, Reprint Author	2	NORTHWESTERN-UNIV	NORTHWESTERN-UNIV	NORTHWESTERN-UNIV	University	University - Rank 001-025	University - Rank 001-025	University - Rank 001-025	1	0	0	0	0	1	0	0	0	0	0	0	0	0	1	0	0	0	0	0	0	1	0	1	0	Article
51463445	Global Comparators Project: International Comparison of Hospital Outcomes Using Administrative Data	HEALTH SERVICES RESEARCH	5	4	Green OA article	Green OA	5	Aylin-P	Aylin	Paul	Author	1	UNIV-LONDON-IMPERIAL-COLL-SCI-TECHNOL-&-MED	UNIV-LONDON-IMPERIAL-COLL-SCI-TECHNOL-&-MED	UNIV-LONDON-IMPERIAL-COLL-SCI-TECHNOL-&-MED	University	University - Rank 001-025	University - Rank 001-025	University - Rank 001-025	1	0	0	0	0	1	0	0	0	0	0	0	0	0	1	0	0	0	0	0	0	1	0	1	0	Article
52031485	Global Control and Regional Elimination of Measles, 2000-2012	MMWR-MORBIDITY AND MORTALITY WEEKLY REPORT	8	3	Gold OA article (non-APC)	Gold OA	8	Goodson-JL	Goodson	James L.	Author, Reprint Author	3	CDC	CDC	CDC	Government	Government	Government	Government	1	0	0	0	1	0	0	0	0	1	0	0	0	0	0	0	0	0	0	0	0	0	0	0	1	Article
50303279	Global Database on donation and transplantation: Goals, methods and critical issues (www.transplant-observatory.org)	TRANSPLANTATION REVIEWS	5	3	Toll access article	Toll access	5	Matesanz-R	Matesanz	Rafael	Author	2	ORG-NACL-TRASPLANTES	ORG-NACL-TRASPLANTES	ORG-NACL-TRASPLANTES	Non-profit	Non-profit	Non-profit	Non-profit	1	0	0	0	0	0	0	1	0	0	0	1	0	0	0	0	0	0	0	0	0	0	0	0	1	Article
47031617	Global Distribution of Measles Genotypes and Measles Molecular Epidemiology	JOURNAL OF INFECTIOUS DISEASES	34	25	Hybrid article	Hybrid	34	Featherstone-D	Featherstone	David	Author	25	WHO-HEADQUARTERS	WHO	WHO	Non-profit	Non-profit	Non-profit	Non-profit	1	3500	0	0	0	0	1	0	0	0	0	1	0	0	0	0	0	0	0	0	0	0	1	0	1	Article
49416672	Global Efforts to Address Severe Acute Malnutrition	JOURNAL OF PEDIATRIC GASTROENTEROLOGY AND NUTRITION	8	7	Toll access article	Toll access	8	Kleinman-RE	Kleinman	Ronald E.	Author	6	MASSACHUSETTS-GEN-HOP	MASSACHUSETTS-GEN-HOSP	MASSACHUSETTS-GEN-HOSP	Hospital	University - Rank 001-025	University-Hospital	Hospital	1	0	0	0	0	0	0	1	0	0	1	0	0	0	0	0	0	0	0	0	0	0	0	0	1	Article
53065066	Global Emergency Medicine: A Review of the Literature From 2013	ACADEMIC EMERGENCY MEDICINE	9	12	Hybrid article	Hybrid	9	Levine-AC	Levine	Adam C.	Author	8	HARVARD-HUMANITARIAN-INITIAT	HARVARD-UNIV	HARVARD-MED-SCH	Hospital	University - Rank 001-025	University-Hospital	Hospital	1	3000	0	0	0	0	1	0	0	0	1	0	0	0	0	0	0	0	0	0	0	0	1	0	1	Review
50916924	Global Epidemiology of Amyotrophic Lateral Sclerosis: A Systematic Review of the Published Literature	NEUROEPIDEMIOLOGY	7	6	Green OA article	Green OA	7	White-LA	White	L. A.	Author	6	BIOGEN-IDEC-INC	BIOGEN-IDEC-INC	BIOGEN-IDEC-INC	Company	Company	Company	Company	1	0	0	0	0	1	0	0	1	0	0	0	0	0	0	0	0	0	0	0	0	0	0	0	1	Review
50840852	Global Epidemiology of Mental Disorders: What Are We Missing?	PLOS ONE	5	7	Gold OA article (APC)	Gold OA	5	Whiteford-HA	Whiteford	Harvey A.	Author	1	UNIV-QUEENSLAND	UNIV-QUEENSLAND	UNIV-QUEENSLAND	University	University - Rank 051-100	University - Rank 51-100	University - Rank 051-100	1	1495	0	1	0	0	0	0	0	0	0	0	0	0	0	0	1	0	0	0	0	1	1	0	1	Article
49929701	Global Epidemiology of Psoriasis: A Systematic Review of Incidence and Prevalence	JOURNAL OF INVESTIGATIVE DERMATOLOGY	4	4	Toll access article	Toll access	4	Ashcroft-DM	Ashcroft	Darren M.	Author, Reprint Author	1	UNIV-MANCHESTER	UNIV-MANCHESTER	UNIV-MANCHESTER	University	University - Rank 051-100	University - Rank 51-100	University - Rank 051-100	1	0	0	0	0	0	0	1	0	0	0	0	0	0	0	0	1	0	0	0	0	1	0	0	1	Review
50130703	Global Epidemiology of Tuberculosis Preface	SEMINARS IN RESPIRATORY AND CRITICAL CARE MEDICINE	4	1	Hybrid article	Hybrid	4	Raviglione-M	Raviglione	Mario	Author	1	WORLD-HLTH-ORG	WHO	WHO	Non-profit	Non-profit	Non-profit	Non-profit	1	3300	0	0	0	0	1	0	0	0	0	1	0	0	0	0	0	0	0	0	0	0	1	0	1	Review
46251897	Global Estimates of Fatal Work-Related Diseases by Region and Disease Group, 2002	INTERNATIONAL JOURNAL OF OCCUPATIONAL AND ENVIRONMENTAL HEALTH	3	2	Green OA article	Green OA	3	Takala-J	Takala	Jukka	Author	2	EUROPEAN-AGCY-SAFETY-&-HLTH-WORK	EUROPEAN-AGCY-SAFETY-&-HLTH-WORK	EUROPEAN-AGCY-SAFETY-&-HLTH-WORK	Government	Government	Government	Government	1	0	0	0	0	1	0	0	0	1	0	0	0	0	0	0	0	0	0	0	0	0	0	0	1	Article
50110273	Global Estimates of Syphilis in Pregnancy and Associated Adverse Outcomes: Analysis of Multinational Antenatal Surveillance Data	PLOS MEDICINE	7	5	Gold OA article (APC)	Gold OA	7	Broutet-N	Broutet	Nathalie	Author	1	WORLD-HLTH-ORG	WHO	WHO	Non-profit	Non-profit	Non-profit	Non-profit	1	2900	0	1	0	0	0	0	0	0	0	1	0	0	0	0	0	0	0	0	0	0	1	0	1	Article
44797375	Global Evolutionary Trend of the Prevalence of Primary Glomerulonephritis over the Past Three Decades	NEPHRON CLINICAL PRACTICE	17	4	Green OA article	Green OA	17	Wong-KS	Wong	Kok-Seng	Author	1	SINGAPORE-GEN-HOSP	SINGAPORE-GEN-HOSP	SINGAPORE-GEN-HOSP	Hospital	Hospital	Hospital	Hospital	1	0	0	0	0	1	0	0	0	0	1	0	0	0	0	0	0	0	0	0	0	0	0	0	1	Article
48850998	Global Fund investments in harm reduction from 2002 to 2009	INTERNATIONAL JOURNAL OF DRUG POLICY	4	3	Hybrid article	Hybrid	4	Lazarus-JV	Lazarus	Jeffrey V.	Author	1	GLOBAL-FUND-FIGHT-AIDS-TB-&-MALARIA	GLOBAL-FUND-FIGHT-AIDS-TB-&-MALARIA	GLOBAL-FUND-FIGHT-AIDS-TB-&-MALARIA	Non-profit	Non-profit	Non-profit	Non-profit	1	2500	0	0	0	0	1	0	0	0	0	1	0	0	0	0	0	0	0	0	0	0	1	0	1	Article
49813271	Global Gender Disparities in Obesity: A Review	ADVANCES IN NUTRITION	2	2	Green OA article	Green OA	2	Caballero-B	Caballero	Benjamin	Author	1	JOHNS-HOPKINS-BLOOMBERG-SCH-PUBL-HLTH	JOHNS-HOPKINS-UNIV	JOHNS-HOPKINS-UNIV	University	University - Rank 001-025	University - Rank 001-025	University - Rank 001-025	1	0	0	0	0	1	0	0	0	0	0	0	0	0	1	0	0	0	0	0	0	1	0	1	0	Review
44460989	Global Government Health Partners' Forum 2006: eighteen months later	INTERNATIONAL NURSING REVIEW	5	2	Toll access article	Toll access	5	Salmon-M	Salmon	M.	Author	2	UNIV-WASHINGTON	UNIV-WASHINGTON	UNIV-WASHINGTON	University	University - Rank 026-050	University - Rank 026-050	University - Rank 026-050	1	0	0	0	0	0	0	1	0	0	0	0	0	0	0	1	0	0	0	0	0	1	0	1	0	Article
52772151	Global HIV Epidemiology: A Guide for Strategies in Prevention and Care	CURRENT HIV/AIDS REPORTS	1	2	Green OA article	Green OA	1	Vermund-SH	Vermund	Sten H.	Author, Reprint Author	1	VANDERBILT-UNIV	VANDERBILT-UNIV	VANDERBILT-UNIV	University	University - Rank 101-200	University - Rank 101-200	University - Rank 101-200	1	0	0	0	0	1	0	0	0	0	0	0	0	0	0	0	0	1	0	0	0	1	0	0	1	Article
48759056	Global Health Business: The Production and Performativity of Statistics in Sierra Leone and Germany	MEDICAL ANTHROPOLOGY	1	2	Toll access article	Toll access	1	Erikson-SL	Erikson	Susan L.	Author, Reprint Author	1	SIMON-FRASER-UNIV	SIMON-FRASER-UNIV	SIMON-FRASER-UNIV	University	University - Rank 201-500	University - Rank 201-500	University - Rank 201-500	1	0	0	0	0	0	0	1	0	0	0	0	0	0	0	0	0	0	1	0	0	1	0	0	1	Article
52630947	Global Health Development Assistance Remained Steady In 2013 But Did Not Align With Recipients' Disease Burden	HEALTH AFFAIRS	8	1	Toll access article	Toll access	1	Dieleman-JL	Dieleman	Joseph L.	Author, Reprint Author	1	UNIV-WASHINGTON	UNIV-WASHINGTON	UNIV-WASHINGTON	University	University - Rank 026-050	University - Rank 026-050	University - Rank 026-050	1	0	0	0	0	0	0	1	0	0	0	0	0	0	0	1	0	0	0	0	0	1	0	1	0	Article
47288735	Global Health Diplomacy and Peace	INFECTIOUS DISEASE CLINICS OF NORTH AMERICA	2	2	Green OA article	Green OA	2	Buss-P	Buss	Paulo	Author	2	OSWALDO-CRUZ-FDN-FIOCRUZ	OSWALDO-CRUZ-FDN-FIOCRUZ	OSWALDO-CRUZ-FDN-FIOCRUZ	Non-profit	Non-profit	Non-profit	Non-profit	1	0	0	0	0	1	0	0	0	0	0	1	0	0	0	0	0	0	0	0	0	0	0	0	1	Article
46859578	Global Health Education Consortium: 20 Years of Leadership in Global Health and Global Health Education	INFECTIOUS DISEASE CLINICS OF NORTH AMERICA	1	2	Green OA article	Green OA	1	Velji-A	Velji	Anvar	Author, Reprint Author	1	KAISER-PERMANENTE	KAISER-PERMANENTE	KAISER-PERMANENTE	Company	Company	Company	Company	1	0	0	0	0	1	0	0	1	0	0	0	0	0	0	0	0	0	0	0	0	0	0	0	1	Article
47277469	Global Health Education for Pediatric Residents: A National Survey	PEDIATRICS	7	6	Delayed OA article	Delayed OA	7	OCallahan-C	O'Callahan	Cliff	Author	6	MIDDLESEX-HOSP-FAMILY-MED-RESIDENCY	MIDDLESEX-HOSP	MIDDLESEX-HOSP	Hospital	Hospital	Hospital	Hospital	1	0	1	0	0	0	0	0	0	0	1	0	0	0	0	0	0	0	0	0	0	0	0	0	1	Article
51864885	Global Health Educational Engagement-A Tale of Two Models	ACADEMIC MEDICINE	5	5	Toll access article	Toll access	5	Evert-J	Evert	Jessica	Author, Reprint Author	4	UNIV-CALIF-SAN-FRANCISCO	UCSF	UCSF	University	University - Rank 001-025	University - Rank 001-025	University - Rank 001-025	1	0	0	0	0	0	0	1	0	0	0	0	0	0	1	0	0	0	0	0	0	1	0	1	0	Article
45050858	Global Health Governance: Commission on Social Determinants of Health and the Imperative for Change	JOURNAL OF LAW MEDICINE & ETHICS	3	2	Toll access article	Toll access	2	Taylor-S	Taylor	Sebastian	Author	1	UCL	UCL	UCL	University	University - Rank 001-025	University - Rank 001-025	University - Rank 001-025	1	0	0	0	0	0	0	1	0	0	0	0	0	0	1	0	0	0	0	0	0	1	0	1	0	Article
53282565	Global Health Imaging Curriculum in Radiology Residency Programs: The Fundamentals	JOURNAL OF THE AMERICAN COLLEGE OF RADIOLOGY	7	5	Green OA article	Green OA	7	Gerber-RE	Gerber	R. E.	Author	3	BRIGHAM-&-WOMENS-HOSP	BRIGHAM-&-WOMENS-HOSP	BRIGHAM-&-WOMENS-HOSP	Hospital	University - Rank 001-025	University-Hospital	Hospital	1	0	0	0	0	1	0	0	0	0	1	0	0	0	0	0	0	0	0	0	0	0	0	0	1	Article
53793706	Global Health Impacts of Future Aviation Emissions Under Alternative Control Scenarios	ENVIRONMENTAL SCIENCE & TECHNOLOGY	4	2	Green OA article	Green OA	4	Kinney-PL	Kinney	Patrick L.	Author	1	COLUMBIA-UNIV	COLUMBIA-UNIV	COLUMBIA-UNIV	University	University - Rank 001-025	University - Rank 001-025	University - Rank 001-025	1	0	0	0	0	1	0	0	0	0	0	0	0	0	1	0	0	0	0	0	0	1	0	1	0	Article
47892994	Global Health Technology 2.0	IEEE PULSE	4	2	Green OA article	Green OA	4	Olson-KR	Olson	Kristian R.	Author	1	MASSACHUSETTS-GEN-HOSP	MASSACHUSETTS-GEN-HOSP	MASSACHUSETTS-GEN-HOSP	Hospital	University - Rank 001-025	University-Hospital	Hospital	1	0	0	0	0	1	0	0	0	0	1	0	0	0	0	0	0	0	0	0	0	0	0	0	1	Article
48532177	Global Health Training in Pediatric Residency: A Qualitative Analysis of Faculty Director Insights	ACADEMIC PEDIATRICS	4	3	Toll access article	Toll access	4	Chamberlain-LJ	Chamberlain	Lisa J.	Author	1	STANFORD-SCH-MED	STANFORD-UNIV	STANFORD-UNIV	University	University - Rank 001-025	University - Rank 001-025	University - Rank 001-025	1	0	0	0	0	0	0	1	0	0	0	0	0	0	1	0	0	0	0	0	0	1	0	1	0	Article
52966657	Global Health Training in US Graduate Psychiatric Education	ACADEMIC PSYCHIATRY	6	3	Green OA article	Green OA	6	Kerry-VB	Kerry	Vanessa B.	Author	1	MASSACHUSETTS-GEN-HOSP	MASSACHUSETTS-GEN-HOSP	MASSACHUSETTS-GEN-HOSP	Hospital	University - Rank 001-025	University-Hospital	Hospital	1	0	0	0	0	1	0	0	0	0	1	0	0	0	0	0	0	0	0	0	0	0	0	0	1	Article
51599031	Global Health and Emergency Care: A Postgraduate Medical Education Consensus-based Research Agenda	ACADEMIC EMERGENCY MEDICINE	9	11	Hybrid article	Hybrid	9	Tupesis-JP	Tupesis	Janis P.	Author	11	UNIV-WISCONSIN	UNIV-WISCONSIN	UNIV-WISCONSIN	University	University - Rank 026-050	University - Rank 026-050	University - Rank 026-050	1	3000	0	0	0	0	1	0	0	0	0	0	0	0	0	1	0	0	0	0	0	1	1	1	0	Article
51599039	Global Health and Emergency Care: A Resuscitation Research Agenda-Part 1	ACADEMIC EMERGENCY MEDICINE	20	23	Hybrid article	Hybrid	20	Ong-MEH	Ong	Marcus Eng Hock	Author	22	SINGAPORE-GEN-HOSP	SINGAPORE-GEN-HOSP	SINGAPORE-GEN-HOSP	Hospital	Hospital	Hospital	Hospital	1	3000	0	0	0	0	1	0	0	0	1	0	0	0	0	0	0	0	0	0	0	0	1	0	1	Article
51599030	Global Health and Emergency Care: An Undergraduate Medical Education Consensus-based Research Agenda	ACADEMIC EMERGENCY MEDICINE	8	9	Hybrid article	Hybrid	8	Kapur-GB	Kapur	G. Bobby	Author	9	BAYLOR-COLL-MED	BAYLOR-COLL-MED	BAYLOR-COLL-MED	University	University: Unranked	University: Unranked	University: Unranked	1	3000	0	0	0	0	1	0	0	0	0	0	0	0	0	0	0	0	0	0	1	1	1	0	1	Article
44774318	Global Health and Foreign Policy	EPIDEMIOLOGIC REVIEWS	3	2	Green OA article	Green OA	3	Michaud-J	Michaud	Joshua	Author	1	JOHNS-HOPKINS-UNIV	JOHNS-HOPKINS-UNIV	JOHNS-HOPKINS-UNIV	University	University - Rank 001-025	University - Rank 001-025	University - Rank 001-025	1	0	0	0	0	1	0	0	0	0	0	0	0	0	1	0	0	0	0	0	0	1	0	1	0	Article
50608748	Global Health and Justice: Re-examining our Values	BIOETHICS	1	4	Toll access article	Toll access	1	Benatar-SR	Benatar	Solomon R.	Author, Reprint Author	1	UNIV-CAPE-TOWN	UNIV-CAPE-TOWN	UNIV-CAPE-TOWN	University	University - Rank 101-200	University - Rank 101-200	University - Rank 101-200	1	0	0	0	0	0	0	1	0	0	0	0	0	0	0	0	0	1	0	0	0	1	0	0	1	Article
48794976	Global Health and Primary Care: Increasing Burden of Chronic Diseases and Need for Integrated Training	MOUNT SINAI JOURNAL OF MEDICINE	7	2	Green OA article	Green OA	7	Ripp-J	Ripp	Jonathan	Author, Reprint Author	1	MT-SINAI-SCH-MED	MT-SINAI-MED-CTR	MT-SINAI-MED-CTR	Hospital	University - Rank 026-050	University-Hospital	Hospital	1	0	0	0	0	1	0	0	0	0	1	0	0	0	0	0	0	0	0	0	0	0	0	0	1	Article
46426839	Global Health and the Global Economic Crisis	AMERICAN JOURNAL OF PUBLIC HEALTH	3	3	Green OA article	Green OA	3	Bakker-I	Bakker	Isabella	Author	3	YORK-UNIV	YORK-UNIV	YORK-UNIV	University	University - Rank 201-500	University - Rank 201-500	University - Rank 201-500	1	0	0	0	0	1	0	0	0	0	0	0	0	0	0	0	0	0	1	0	0	1	0	0	1	Article
46859577	Global Health and the Role of Universities in the Twenty-First Century	INFECTIOUS DISEASE CLINICS OF NORTH AMERICA	2	3	Green OA article	Green OA	2	Velji-A	Velji	Anvar	Author, Reprint Author	1	KAISER-PERMANENTE	KAISER-PERMANENTE	KAISER-PERMANENTE	Company	Company	Company	Company	1	0	0	0	0	1	0	0	1	0	0	0	0	0	0	0	0	0	0	0	0	0	0	0	1	Article
47288732	Global Health in the UK Government and University Sector	INFECTIOUS DISEASE CLINICS OF NORTH AMERICA	3	1	Green OA article	Green OA	3	Easterbrook-PJ	Easterbrook	Philippa J.	Author, Reprint Author	1	ROYAL-COLL-PHYSICIANS	ROYAL-COLL-PHYSICIANS	ROYAL-COLL-PHYSICIANS	Scientific association	Scientific association	Scientific association	Scientific association	1	0	0	0	0	1	0	0	0	0	0	0	0	1	0	0	0	0	0	0	0	0	0	0	1	Article
50350472	Global Health, Vulnerable Populations, and Law	JOURNAL OF LAW MEDICINE & ETHICS	1	3	Toll access article	Toll access	1	Benatar-SR	Benatar	Solomon R.	Author, Reprint Author	1	UNIV-CAPE-TOWN	UNIV-CAPE-TOWN	UNIV-CAPE-TOWN	University	University - Rank 101-200	University - Rank 101-200	University - Rank 101-200	1	0	0	0	0	0	0	1	0	0	0	0	0	0	0	0	0	1	0	0	0	1	0	0	1	Article
45202478	Global Health: A Successful Context for Precollege Training and Advocacy	PLOS ONE	3	2	Gold OA article (APC)	Gold OA	3	Britschgi-TB	Britschgi	Theresa B.	Author	1	SEATTLE-BIOMED-RES-INST	CENT INF DIS RES SEATTLE	CENT INF DIS RES SEATTLE	Research institute	Research Institute	Research Institute	Research Institute	1	1495	0	1	0	0	0	0	0	0	0	0	1	0	0	0	0	0	0	0	0	0	1	0	1	Article
47288737	Global Health: Chronic Diseases and Other Emergent Issues in Global Health	INFECTIOUS DISEASE CLINICS OF NORTH AMERICA	3	1	Green OA article	Green OA	2	Anwar-S	Anwar	Shahela	Author	1	INT-CTR-DIARRHOEAL-DIS-RES	INT-CTR-DIARRHOEAL-DIS-RES	INT-CTR-DIARRHOEAL-DIS-RES	Non-profit	Non-profit	Non-profit	Non-profit	1	0	0	0	0	1	0	0	0	0	0	1	0	0	0	0	0	0	0	0	0	0	0	0	1	Article
46859576	Global Health: Evolving Meanings	INFECTIOUS DISEASE CLINICS OF NORTH AMERICA	2	5	Green OA article	Green OA	2	Bryant-JH	Bryant	John H.	Author	3	JOHNS-HOPKINS-SCH-PUBL-HLTH	JOHNS-HOPKINS-UNIV	JOHNS-HOPKINS-UNIV	University	University - Rank 001-025	University - Rank 001-025	University - Rank 001-025	1	0	0	0	0	1	0	0	0	0	0	0	0	0	1	0	0	0	0	0	0	1	0	1	0	Article
46859587	Global Health: Governance and Policy Development	INFECTIOUS DISEASE CLINICS OF NORTH AMERICA	1	2	Green OA article	Green OA	1	Kelley-PW	Kelley	Patrick W.	Author, Reprint Author	1	NATL-ACAD	NATL-ACAD	NATL-ACAD	Scientific association	Scientific association	Scientific association	Scientific association	1	0	0	0	0	1	0	0	0	0	0	0	0	1	0	0	0	0	0	0	0	0	0	0	1	Article
47288739	Global Health: Injuries and Violence	INFECTIOUS DISEASE CLINICS OF NORTH AMERICA	4	3	Green OA article	Green OA	4	Norton-R	Norton	Robyn	Author	3	UNIV-SYDNEY	UNIV-SYDNEY	UNIV-SYDNEY	University	University - Rank 051-100	University - Rank 51-100	University - Rank 051-100	1	0	0	0	0	1	0	0	0	0	0	0	0	0	0	0	1	0	0	0	0	1	0	0	1	Article
46859579	Global Health: Networking Innovative Academic Institutions	INFECTIOUS DISEASE CLINICS OF NORTH AMERICA	2	1	Green OA article	Green OA	2	Neusy-AJ	Neusy	Andre-Jacques	Author, Reprint Author	1	TRAINING-HLTH-EQU-NETWORK	TRAINING-HLTH-EQU-NETWORK	TRAINING-HLTH-EQU-NETWORK	Research institute	Research Institute	Research Institute	Research Institute	1	0	0	0	0	1	0	0	0	0	0	0	1	0	0	0	0	0	0	0	0	0	0	0	1	Article
47288730	Global Health: The Fogarty International Center, National Institutes of Health: Vision and Mission, Programs, and Accomplishments	INFECTIOUS DISEASE CLINICS OF NORTH AMERICA	4	1	Green OA article	Green OA	4	Glass-RI	Glass	Roger I.	Author	1	NIH	NIH	NIH	Government	Government	Government	Government	1	0	0	0	0	1	0	0	0	1	0	0	0	0	0	0	0	0	0	0	0	0	0	0	1	Article
52696563	Global Incidence of Human Shiga Toxin-Producing Escherichia coli Infections and Deaths: A Systematic Review and Knowledge Synthesis	FOODBORNE PATHOGENS AND DISEASE	8	7	Green OA article	Green OA	8	Kirk-MD	Kirk	Martyn D.	Author	7	AUSTRALIAN-NATL-UNIV	AUSTRALIAN-NATL-UNIV	AUSTRALIAN-NATL-UNIV	University	University - Rank 026-050	University - Rank 026-050	University - Rank 026-050	1	0	0	0	0	1	0	0	0	0	0	0	0	0	0	1	0	0	0	0	0	1	0	1	0	Article
44850139	Global Inequality in Eye Health: Country-Level Analysis From the Global Burden of Disease Study	AMERICAN JOURNAL OF PUBLIC HEALTH	3	2	Green OA article	Green OA	2	Hiratsuka-Y	Hiratsuka	Yoshimune	Author	2	NATL-INST-PUBL-HLTH	NATL-INST-PUBL-HLTH-JAPAN	NATL-INST-PUBL-HLTH-JAPAN	Government	Government	Government	Government	1	0	0	0	0	1	0	0	0	1	0	0	0	0	0	0	0	0	0	0	0	0	0	0	1	Article
53808067	Global Invasive Bacterial Vaccine-Preventable Diseases Surveillance-2008-2014	MMWR-MORBIDITY AND MORTALITY WEEKLY REPORT	23	11	Gold OA article (non-APC)	Gold OA	23	Cherian-T	Cherian	Thomas	Author	1	WORLD-HLTH-ORG-WHO	WHO	WHO	Non-profit	Non-profit	Non-profit	Non-profit	1	0	0	0	1	0	0	0	0	0	0	1	0	0	0	0	0	0	0	0	0	0	0	0	1	Article
50389963	Global Iodine Nutrition: Where Do We Stand in 2013?	THYROID	3	2	Toll access article	Toll access	3	Zimmermann-MB	Zimmermann	Michael B.	Author	2	SWISS-FED-INST-TECHNOL	ETH ZURICH	ETH ZURICH	University	University - Rank 001-025	University - Rank 001-025	University - Rank 001-025	1	0	0	0	0	0	0	1	0	0	0	0	0	0	1	0	0	0	0	0	0	1	0	1	0	Article
48245113	Global Iodine Status in 2011 and Trends over the Past Decade	JOURNAL OF NUTRITION	3	2	Hybrid article	Hybrid	3	Zimmermann-MB	Zimmermann	Michael B.	Author	1	SWISS-FED-INST-TECHNOL	ETH ZURICH	ETH ZURICH	University	University - Rank 001-025	University - Rank 001-025	University - Rank 001-025	1	5000	0	0	0	0	1	0	0	0	0	0	0	0	1	0	0	0	0	0	0	1	1	1	0	Article
47288741	Global Laboratory Systems Development: Needs and Approaches	INFECTIOUS DISEASE CLINICS OF NORTH AMERICA	2	2	Green OA article	Green OA	2	Barnhart-S	Barnhart	Scott	Author	2	UNIV-WASHINGTON	UNIV-WASHINGTON	UNIV-WASHINGTON	University	University - Rank 026-050	University - Rank 026-050	University - Rank 026-050	1	0	0	0	0	1	0	0	0	0	0	0	0	0	0	1	0	0	0	0	0	1	0	1	0	Article
47399270	Global Mental Health 2 Child and adolescent mental health worldwide: evidence for action	LANCET	10	10	Toll access article	Toll access	10	Rahman-A	Rahman	Atif	Author, Reprint Author	1	UNIV-LIVERPOOL	UNIV-LIVERPOOL	UNIV-LIVERPOOL	University	University - Rank 101-200	University - Rank 101-200	University - Rank 101-200	1	0	0	0	0	0	0	1	0	0	0	0	0	0	0	0	0	1	0	0	0	1	0	0	1	Article
47452456	Global Mental Health 4 Scale up of services for mental health in low-income and middle-income countries	LANCET	9	8	Green OA article	Green OA	9	Saxena-S	Saxena	Shekhar	Author	8	WHO	WHO	WHO	Non-profit	Non-profit	Non-profit	Non-profit	1	0	0	0	0	1	0	0	0	0	0	1	0	0	0	0	0	0	0	0	0	0	0	0	1	Article
47452636	Global Mental Health 5 Human resources for mental health care: current situation and strategies for action	LANCET	8	8	Green OA article	Green OA	8	Scheffler-RM	Scheffler	Richard M.	Author	8	UNIV-CALIF-BERKELEY	UC-BERKELEY	UC-BERKELEY	University	University - Rank 001-025	University - Rank 001-025	University - Rank 001-025	1	0	0	0	0	1	0	0	0	0	0	0	0	0	1	0	0	0	0	0	0	1	0	1	0	Article
48129040	Global Mental Health as a Component of Psychiatric Residency Training	PSYCHIATRIC QUARTERLY	3	2	Green OA article	Green OA	3	Wiegand-J	Wiegand	Jessica	Author	1	COLUMBIA-PRESBYTERIAN-MED-CTR	COLUMBIA-PRESBYTERIAN-MED-CTR	COLUMBIA-PRESBYTERIAN-MED-CTR	Hospital	University - Rank 001-025	University-Hospital	Hospital	1	0	0	0	0	1	0	0	0	0	1	0	0	0	0	0	0	0	0	0	0	0	0	0	1	Article
50016625	Global NeuroAIDS Roundtable	JOURNAL OF NEUROVIROLOGY	26	19	Green OA article	Green OA	26	Wood-C	Wood	Charles	Author	19	UNIV-NEBRASKA	UNIV-NEBRASKA-LINCOLN	UNIV-NEBRASKA-LINCOLN	University	University - Rank 201-500	University - Rank 201-500	University - Rank 201-500	1	0	0	0	0	1	0	0	0	0	0	0	0	0	0	0	0	0	1	0	0	1	0	0	1	Review
53713181	Global Occupational Health: Current Challenges and the Need for Urgent Action	ANNALS OF GLOBAL HEALTH	2	3	Gold OA article (APC)	Gold OA	2	London-L	London	Leslie	Author	3	UNIV-CAPE-TOWN	UNIV-CAPE-TOWN	UNIV-CAPE-TOWN	University	University - Rank 101-200	University - Rank 101-200	University - Rank 101-200	1	1200	0	1	0	0	0	0	0	0	0	0	0	0	0	0	0	1	0	0	0	1	1	0	1	Article
44829192	Global Patterns of Cancer Incidence and Mortality Rates and Trends	CANCER EPIDEMIOLOGY BIOMARKERS & PREVENTION	4	1	Delayed OA article	Delayed OA	4	Ward-EM	Ward	Elizabeth M.	Author	1	AMER-CANC-SOC	AMER-CANC-SOC	AMER-CANC-SOC	Scientific association	Scientific association	Scientific association	Scientific association	1	0	1	0	0	0	0	0	0	0	0	0	0	1	0	0	0	0	0	0	0	0	0	0	1	Review
52750359	Global Perspective on Acute Coronary Syndrome A Burden on the Young and Poor	CIRCULATION RESEARCH	3	5	Green OA article	Green OA	3	Fuster-V	Fuster	Valentin	Author, Reprint Author	1	ICAHN-SCH-MED-MT-SINAI	ICAHN-SCH-MED-MT-SINAI	ICAHN-SCH-MED-MT-SINAI	University	University: Unranked	University: Unranked	University: Unranked	1	0	0	0	0	1	0	0	0	0	0	0	0	0	0	0	0	0	0	0	1	1	0	0	1	Article
52044218	Global Perspectives on Resilience in Children and Youth	CHILD DEVELOPMENT	1	1	Toll access article	Toll access	1	Masten-AS	Masten	Ann S.	Author, Reprint Author	1	UNIV-MINNESOTA	UNIV-MINNESOTA	UNIV-MINNESOTA	University	University - Rank 051-100	University - Rank 51-100	University - Rank 051-100	1	0	0	0	0	0	0	1	0	0	0	0	0	0	0	0	1	0	0	0	0	1	0	0	1	Article
48635890	Global Prevalence of Autism and Other Pervasive Developmental Disorders	AUTISM RESEARCH	12	12	Green OA article	Green OA	12	Fombonne-E	Fombonne	Eric	Author, Reprint Author	1	MONTREAL-CHILDRENS-HOSP	MCGILL-UNIV	MCGILL-UNIV-HOSP	Hospital	University - Rank 026-050	University-Hospital	Hospital	1	0	0	0	0	1	0	0	0	0	1	0	0	0	0	0	0	0	0	0	0	0	0	0	1	Review
53523014	Global Prevalence of Glaucoma and Projections of Glaucoma Burden through 2040 A Systematic Review and Meta-Analysis	OPHTHALMOLOGY	6	8	Toll access article	Toll access	6	Cheng-CY	Cheng	Ching-Yu	Author, Reprint Author	1	SINGAPORE-EYE-RES-INST	SINGAPORE-NATL-EYE-CTR	SINGAPORE-NATL-EYE-CTR	Hospital	Hospital	Hospital	Hospital	1	0	0	0	0	0	0	1	0	0	1	0	0	0	0	0	0	0	0	0	0	0	0	0	1	Article
51448752	Global Prevalence of Vision Impairment and Blindness Magnitude and Temporal Trends, 1990-2010	OPHTHALMOLOGY	12	12	Green OA article	Green OA	12	Bourne-RRA	Bourne	Rupert R. A.	Author, Reprint Author	5	ANGLIA-RUSKIN-UNIV	ANGLIA-RUSKIN-UNIV	ANGLIA-RUSKIN-UNIV	University	University - Rank 201-500	University - Rank 201-500	University - Rank 201-500	1	0	0	0	0	1	0	0	0	0	0	0	0	0	0	0	0	0	1	0	0	1	0	0	1	Article
46229995	Global Public Health Legal Responses to H1N1	JOURNAL OF LAW MEDICINE & ETHICS	4	4	Green OA article	Green OA	4	Kinney-ED	Kinney	Eleanor D.	Author	4	INDIANA-UNIV	INDIANA-UNIV	INDIANA-UNIV	University	University - Rank 101-200	University - Rank 101-200	University - Rank 101-200	1	0	0	0	0	1	0	0	0	0	0	0	0	0	0	0	0	1	0	0	0	1	0	0	1	Article
47161903	Global Public-Private Health Partnerships: lessons learned from ten years of experience and evaluation	INTERNATIONAL DENTAL JOURNAL	2	1	Green OA article	Green OA	2	Tanaka-S	Tanaka	Sonja	Author	1	UNAIDS	UNAIDS	UNAIDS	Non-profit	Non-profit	Non-profit	Non-profit	1	0	0	0	0	1	0	0	0	0	0	1	0	0	0	0	0	0	0	0	0	0	0	0	1	Article
47883555	Global Quality Imaging: Improvement Actions	JOURNAL OF THE AMERICAN COLLEGE OF RADIOLOGY	6	6	Green OA article	Green OA	6	George-R	George	Robert	Author	6	INT-SOC-RADIOGRAPHERS-&-RADIOL-TECHNOL	INT-SOC-RADIOGRAPHERS-&-RADIOL-TECHNOL	INT-SOC-RADIOGRAPHERS-&-RADIOL-TECHNOL	Scientific association	Scientific association	Scientific association	Scientific association	1	0	0	0	0	1	0	0	0	0	0	0	0	1	0	0	0	0	0	0	0	0	0	0	1	Article
53648622	Global Routine Vaccination Coverage, 2013	MMWR-MORBIDITY AND MORTALITY WEEKLY REPORT	5	4	Gold OA article (non-APC)	Gold OA	5	Sodha-SV	Sodha	Samir V.	Author	1	CDC	CDC	CDC	Government	Government	Government	Government	1	0	0	0	1	0	0	0	0	1	0	0	0	0	0	0	0	0	0	0	0	0	0	0	1	Article
50055507	Global Strategy for the Diagnosis, Management, and Prevention of Chronic Obstructive Pulmonary Disease GOLD Executive Summary	AMERICAN JOURNAL OF RESPIRATORY AND CRITICAL CARE MEDICINE	13	15	Green OA article	Green OA	13	RodriguezRoisin-R	Rodriguez-Roisin	Roberto	Author	5	UNIV-BARCELONA	UNIV-BARCELONA	UNIV-BARCELONA	University	University - Rank 201-500	University - Rank 201-500	University - Rank 201-500	1	0	0	0	0	1	0	0	0	0	0	0	0	0	0	0	0	0	1	0	0	1	0	0	1	Article
52185626	Global Supply of Health Professionals	NEW ENGLAND JOURNAL OF MEDICINE	2	2	Delayed OA article	Delayed OA	2	Chen-L	Chen	Lincoln	Author	2	CHINA-MED-BOARD	CHINA-MED-BOARD	CHINA-MED-BOARD	Government	Government	Government	Government	1	0	1	0	0	0	0	0	0	1	0	0	0	0	0	0	0	0	0	0	0	0	0	0	1	Review
44732965	Global Surgery: Thoughts on an Emerging Surgical Subspecialty for Students and Residents	JOURNAL OF SURGICAL EDUCATION	4	5	Toll access article	Toll access	4	Kushner-AL	Kushner	Adam L.	Author	2	SURG-OVERSEAS-SOS	SURG-OVERSEAS-SOS	SURG-OVERSEAS-SOS	Non-profit	Non-profit	Non-profit	Non-profit	1	0	0	0	0	0	0	1	0	0	0	1	0	0	0	0	0	0	0	0	0	0	0	0	1	Article
53795759	Global Trend in Overweight and Obesity and Its Association With Cardiovascular Disease Incidence	CIRCULATION JOURNAL	11	4	Gold OA article (non-APC)	Gold OA	11	Aoyama-A	Aoyama	Atsuko	Author	3	NAGOYA-UNIV	NAGOYA-UNIV	NAGOYA-UNIV	University	University - Rank 201-500	University - Rank 201-500	University - Rank 201-500	1	0	0	0	1	0	0	0	0	0	0	0	0	0	0	0	0	0	1	0	0	1	0	0	1	Review
48164305	Global Trends in Rates of Peritoneal Dialysis	JOURNAL OF THE AMERICAN SOCIETY OF NEPHROLOGY	4	2	Green OA article	Green OA	4	Garg-AX	Garg	Amit X.	Author	1	UNIV-WESTERN-ONTARIO	UNIV-WESTERN-ONTARIO	UNIV-WESTERN-ONTARIO	University	University - Rank 201-500	University - Rank 201-500	University - Rank 201-500	1	0	0	0	0	1	0	0	0	0	0	0	0	0	0	0	0	0	1	0	0	1	0	0	1	Article
53367444	Global Variation in the Effects of Ambient Temperature on Mortality A Systematic Evaluation	EPIDEMIOLOGY	22	19	Green OA article	Green OA	22	Williams-G	Williams	Gail	Author	1	UNIV-QUEENSLAND	UNIV-QUEENSLAND	UNIV-QUEENSLAND	University	University - Rank 051-100	University - Rank 51-100	University - Rank 051-100	1	0	0	0	0	1	0	0	0	0	0	0	0	0	0	0	1	0	0	0	0	1	0	0	1	Article
46947585	Global Variation in the Relative Burden of Stroke and Ischemic Heart Disease	CIRCULATION	2	1	Hybrid article	Hybrid	2	Johnston-SC	Johnston	S. Claiborne	Author	1	UNIV-CALIF-SAN-FRANCISCO	UCSF	UCSF	University	University - Rank 001-025	University - Rank 001-025	University - Rank 001-025	1	4600	0	0	0	0	1	0	0	0	0	0	0	0	1	0	0	0	0	0	0	1	1	1	0	Article
45210612	Global Women's Health in 2010: Facing the Challenges	JOURNAL OF WOMENS HEALTH	3	3	Toll access article	Toll access	3	Fathalla-MMF	Fathalla	Mohamed M. F.	Author	3	ASSIUT-UNIV	ASSIUT-UNIV	ASSIUT-UNIV	University	University: Unranked	University: Unranked	University: Unranked	1	0	0	0	0	0	0	1	0	0	0	0	0	0	0	0	0	0	0	0	1	1	0	0	1	Article
50327501	Global alcohol exposure estimates by country, territory and region for 2005a contribution to the Comparative Risk Assessment for the 2010 Global Burden of Disease Study	ADDICTION	6	9	Green OA article	Green OA	6	Rehm-J	Rehm	Juergen	Author	1	CTR-ADDICT-&-MENTAL-HLTH	CTR-ADDICT-&-MENTAL-HLTH	CTR-ADDICT-&-MENTAL-HLTH	Research institute	Research Institute	Research Institute	Research Institute	1	0	0	0	0	1	0	0	0	0	0	0	1	0	0	0	0	0	0	0	0	0	0	0	1	Article
53700938	Global and National Initiatives to Facilitate Studies of Vaccines in Pregnant Women	CLINICAL INFECTIOUS DISEASES	1	1	Hybrid article	Hybrid	1	Gruber-MF	Gruber	Marion F.	Author, Reprint Author	1	US-DEPT-HHS	US-DEPT-HHS	US-DEPT-HHS	Government	Government	Government	Government	1	3500	0	0	0	0	1	0	0	1	0	0	0	0	0	0	0	0	0	0	0	0	1	0	1	Article
52606366	Global and regional burden of first-ever ischaemic and haemorrhagic stroke during 1990-2010: findings from the Global Burden of Disease Study 2010	LANCET GLOBAL HEALTH	20	22	Gold OA article (APC)	Gold OA	20	Murray-C	Murray	Christopher	Author	2	UNIV-WASHINGTON	UNIV-WASHINGTON	UNIV-WASHINGTON	University	University - Rank 026-050	University - Rank 026-050	University - Rank 026-050	1	5000	0	1	0	0	0	0	0	0	0	0	0	0	0	1	0	0	0	0	0	1	1	1	0	Article
51877451	Global and regional burden of stroke during 1990-2010: findings from the Global Burden of Disease Study 2010	LANCET	20	21	Green OA article	Green OA	20	Murray-C	Murray	Christopher	Author	2	UNIV-WASHINGTON	UNIV-WASHINGTON	UNIV-WASHINGTON	University	University - Rank 026-050	University - Rank 026-050	University - Rank 026-050	1	0	0	0	0	1	0	0	0	0	0	0	0	0	0	1	0	0	0	0	0	1	0	1	0	Article
49969161	Global and regional hearing impairment prevalence: an analysis of 42 studies in 29 countries	EUROPEAN JOURNAL OF PUBLIC HEALTH	6	4	Hybrid article	Hybrid	6	Finucane-M	Finucane	Mariel	Author	4	HARVARD-UNIV	HARVARD-UNIV	HARVARD-UNIV	University	University - Rank 001-025	University - Rank 001-025	University - Rank 001-025	1	2400	0	0	0	0	1	0	0	0	0	0	0	0	1	0	0	0	0	0	0	1	1	1	0	Article
49610475	Global and regional mortality from 235 causes of death for 20 age groups in 1990 and 2010: a systematic analysis for the Global Burden of Disease Study 2010	LANCET	189	119	Toll access article	Toll access	189	Murray-CJL	Murray	Christopher J. L.	Author, Reprint Author	1	UNIV-WASHINGTON	UNIV-WASHINGTON	UNIV-WASHINGTON	University	University - Rank 026-050	University - Rank 026-050	University - Rank 026-050	1	0	0	0	0	0	0	1	0	0	0	0	0	0	0	1	0	0	0	0	0	1	0	1	0	Article
53214653	Global assessment of select phytonutrient intakes by level of fruit and vegetable consumption	BRITISH JOURNAL OF NUTRITION	5	3	Green OA article	Green OA	5	Randolph-RK	Randolph	R. Keith	Author	3	NUTRILITE-HLTH-INST	NUTRILITE-HLTH-INST	NUTRILITE-HLTH-INST	Company	Company	Company	Company	1	0	0	0	0	1	0	0	1	0	0	0	0	0	0	0	0	0	0	0	0	0	0	0	1	Article
53403832	Global burden of asthma among children	INTERNATIONAL JOURNAL OF TUBERCULOSIS AND LUNG DISEASE	2	3	Green OA article	Green OA	2	Pearce-N	Pearce	N.	Author	2	LONDON-SCH-HYG-&-TROP-MED	UCL	UCL	University	University - Rank 001-025	University - Rank 001-025	University - Rank 001-025	1	0	0	0	0	1	0	0	0	0	0	0	0	0	1	0	0	0	0	0	0	1	0	1	0	Article
49517995	Global burden of cancer in 2008: a systematic analysis of disability-adjusted life-years in 12 world regions	LANCET	7	3	Toll access article	Toll access	7	Bray-F	Bray	Freddie	Author	1	INT-AGCY-RES-CANC	INT-AGCY-RES-CANC	INT-AGCY-RES-CANC	Research institute	Research Institute	Research Institute	Research Institute	1	0	0	0	0	0	0	1	0	0	0	0	1	0	0	0	0	0	0	0	0	0	0	0	1	Article
47569708	Global burden of chronic pulmonary aspergillosis as a sequel to pulmonary tuberculosis	BULLETIN OF THE WORLD HEALTH ORGANIZATION	3	2	Gold OA article (non-APC)	Gold OA	3	Cole-DC	Cole	Donald C.	Author	2	UNIV-TORONTO	UNIV-TORONTO	UNIV-TORONTO	University	University - Rank 001-025	University - Rank 001-025	University - Rank 001-025	1	0	0	0	1	0	0	0	0	0	0	0	0	0	1	0	0	0	0	0	0	1	0	1	0	Article
47573268	Global burden of respiratory infections due to seasonal influenza in young children: a systematic review and meta-analysis	LANCET	47	37	Green OA article	Green OA	46	Simoes-EAF	Simoes	Eric A. F.	Author	19	UNIV-COLORADO	UNIV-COLORADO-DENVER	UNIV-COLORADO-DENVER	University	University: Unranked	University: Unranked	University: Unranked	1	0	0	0	0	1	0	0	0	0	0	0	0	0	0	0	0	0	0	0	1	1	0	0	1	Review
47697511	Global cancer prevention: An important pathway to global health and development	PUBLIC HEALTH	3	2	Green OA article	Green OA	3	Magnusson-R	Magnusson	R.	Author, Reprint Author	1	SYDNEY-LAW-SCH	SYDNEY-LAW-SCH	SYDNEY-LAW-SCH	University	University: Unranked	University: Unranked	University: Unranked	1	0	0	0	0	1	0	0	0	0	0	0	0	0	0	0	0	0	0	0	1	1	0	0	1	Article
48877026	Global cancer transitions according to the Human Development Index (2008-2030): a population-based study	LANCET ONCOLOGY	5	2	Toll access article	Toll access	5	Forman-D	Forman	David	Author	1	INT-AGCY-RES-CANC	INT-AGCY-RES-CANC	INT-AGCY-RES-CANC	Research institute	Research Institute	Research Institute	Research Institute	1	0	0	0	0	0	0	1	0	0	0	0	1	0	0	0	0	0	0	0	0	0	0	0	1	Article
45922505	Global capacity for emerging infectious disease detection	PROCEEDINGS OF THE NATIONAL ACADEMY OF SCIENCES OF THE UNITED STATES OF AMERICA	10	9	Green OA article	Green OA	10	Brownstein-JS	Brownstein	John S.	Author, Reprint Author	1	CHILDRENS-HOSP	CHILDRENS-HOSP-BOSTON	CHILDRENS-HOSP-BOSTON	Hospital	University - Rank 001-025	University-Hospital	Hospital	1	0	0	0	0	1	0	0	0	0	1	0	0	0	0	0	0	0	0	0	0	0	0	0	1	Article
49061975	Global cardiovascular disease prevention: A call to action for nursing Community-based and public health prevention initiatives	EUROPEAN JOURNAL OF CARDIOVASCULAR NURSING	6	7	Toll access article	Toll access	6	Sikkema-J	Sikkema	Joanna	Author	7	UNIV-MIAMI	UNIV-MIAMI	UNIV-MIAMI	University	University - Rank 101-200	University - Rank 101-200	University - Rank 101-200	1	0	0	0	0	0	0	1	0	0	0	0	0	0	0	0	0	1	0	0	0	1	0	0	1	Article
49061973	Global cardiovascular disease prevention: A call to action for nursing Multilevel policies	EUROPEAN JOURNAL OF CARDIOVASCULAR NURSING	6	4	Toll access article	Toll access	5	Verdouw-HCL	Verdouw	H. C. L. (Lenneke)	Author	4	GROENE-HART-ZIEKENHUIS	GROENE-HART-ZIEKENHUIS	GROENE-HART-ZIEKENHUIS	Hospital	Hospital	Hospital	Hospital	1	0	0	0	0	0	0	1	0	0	1	0	0	0	0	0	0	0	0	0	0	0	0	0	1	Article
52606597	Global causes of maternal death: a WHO systematic analysis	LANCET GLOBAL HEALTH	9	5	Gold OA article (APC)	Gold OA	9	Alkema-L	Alkema	Leontine	Author	4	NATL-UNIV-SINGAPORE	NATL-UNIV-SINGAPORE	NATL-UNIV-SINGAPORE	University	University - Rank 001-025	University - Rank 001-025	University - Rank 001-025	1	5000	0	1	0	0	0	0	0	0	0	0	0	0	1	0	0	0	0	0	0	1	1	1	0	Article
49915915	Global challenges in pediatric oncology	CURRENT OPINION IN PEDIATRICS	4	2	Green OA article	Green OA	4	Frazier-L	Frazier	Lindsay	Author	1	HARVARD-UNIV	HARVARD-UNIV	HARVARD-UNIV	University	University - Rank 001-025	University - Rank 001-025	University - Rank 001-025	1	0	0	0	0	1	0	0	0	0	0	0	0	0	1	0	0	0	0	0	0	1	0	1	0	Review
52434793	Global collaborative networks on meta-analyses of randomized trials published in high impact factor medical journals: a social network analysis	BMC MEDICINE	5	6	Gold OA article (APC)	Gold OA	5	Moher-D	Moher	David	Author	6	OTTAWA-HOSP	OTTAWA-HOSP	OTTAWA-HOSP	Hospital	University - Rank 201-500	University-Hospital	Hospital	1	2785	0	1	0	0	0	0	0	0	1	0	0	0	0	0	0	0	0	0	0	0	1	0	1	Article
49074598	Global concepts of bladder pain syndrome (interstitial cystitis)	WORLD JOURNAL OF UROLOGY	3	3	Green OA article	Green OA	3	Hanno-P	Hanno	Philip	Author	3	HOSP-UNIV-PENN	UNIV-PENN	HOSP-UNIV-PENN	Hospital	University - Rank 001-025	University-Hospital	Hospital	1	0	0	0	0	1	0	0	0	0	1	0	0	0	0	0	0	0	0	0	0	0	0	0	1	Article
51046188	Global confluence of infectious and non-communicable diseases - The case of type 2 diabetes	PREVENTIVE MEDICINE	2	2	Toll access article	Toll access	1	Magee-MJ	Magee	M. J.	Author, Reprint Author	2	EMORY-UNIV	EMORY-UNIV	EMORY-UNIV	University	University - Rank 051-100	University - Rank 51-100	University - Rank 051-100	1	0	0	0	0	0	0	1	0	0	0	0	0	0	0	0	1	0	0	0	0	1	0	0	1	Article
53543591	Global constitutionalism, responsibility to protect, and extra-territorial obligations to realize the right to health: time to overcome the double standard (once again)	INTERNATIONAL JOURNAL FOR EQUITY IN HEALTH	2	3	Gold OA article (APC)	Gold OA	2	Hammonds-R	Hammonds	Rachel	Author	1	INST-TROP-MED	INST-TROP-MED	INST-TROP-MED	Research institute	Research Institute	Research Institute	Research Institute	1	2220	0	1	0	0	0	0	0	0	0	0	1	0	0	0	0	0	0	0	0	0	1	0	1	Article
52635665	Global control of tuberculosis: from extensively drug-resistant to untreatable tuberculosis	LANCET RESPIRATORY MEDICINE	8	12	Toll access article	Toll access	8	Warren-R	Warren	Robin	Author	12	UNIV-STELLENBOSCH	UNIV-STELLENBOSCH	UNIV-STELLENBOSCH	University	University - Rank 201-500	University - Rank 201-500	University - Rank 201-500	1	0	0	0	0	0	0	1	0	0	0	0	0	0	0	0	0	0	1	0	0	1	0	0	1	Review
49329590	Global cost of correcting vision impairment from uncorrected refractive error	BULLETIN OF THE WORLD HEALTH ORGANIZATION	7	2	Gold OA article (non-APC)	Gold OA	7	Frick-KD	Frick	K. D.	Author	2	JOHNS-HOPKINS-BLOOMBERG-SCH-PUBL-HLTH	JOHNS-HOPKINS-UNIV	JOHNS-HOPKINS-UNIV	University	University - Rank 001-025	University - Rank 001-025	University - Rank 001-025	1	0	0	0	1	0	0	0	0	0	0	0	0	0	1	0	0	0	0	0	0	1	0	1	0	Article
44191225	Global dermatopathology: Hansen's disease - current concepts and challenges	JOURNAL OF CUTANEOUS PATHOLOGY	3	4	Toll access article	Toll access	3	Moschella-SL	Moschella	Samuel L.	Author	2	HARVARD-UNIV	HARVARD-UNIV	HARVARD-UNIV	University	University - Rank 001-025	University - Rank 001-025	University - Rank 001-025	1	0	0	0	0	0	0	1	0	0	0	0	0	0	1	0	0	0	0	0	0	1	0	1	0	Article
44321248	Global disparities in the epilepsy treatment gap: a systematic review	BULLETIN OF THE WORLD HEALTH ORGANIZATION	5	4	Gold OA article (non-APC)	Gold OA	5	Birbeck-G	Birbeck	Gretchen	Author	4	CHIKANKATA-HLTH-SERV-EPILEPSY-CARE-TEAM	CHIKANKATA-HOSP	CHIKANKATA-HOSP	Hospital	Hospital	Hospital	Hospital	1	0	0	0	1	0	0	0	0	0	1	0	0	0	0	0	0	0	0	0	0	0	0	0	1	Review
48661712	Global environmental health and sustainable development: the role at Rio+20	CIENCIA & SAUDE COLETIVA	2	1	Gold OA article (non-APC)	Gold OA	1	Furie-GL	Furie	Gregg Lawrence	Author, Reprint Author	1	YALE-UNIV	YALE-UNIV	YALE-UNIV	University	University - Rank 001-025	University - Rank 001-025	University - Rank 001-025	1	0	0	0	1	0	0	0	0	0	0	0	0	0	1	0	0	0	0	0	0	1	0	1	0	Article
53596170	Global epidemiology and genotype distribution of the hepatitis C virus infection	JOURNAL OF HEPATOLOGY	5	1	Hybrid article	Hybrid	5	Razavi-H	Razavi	Homie	Author, Reprint Author	1	CTR-DIS-ANAL	CTR-DIS-ANAL	CTR-DIS-ANAL	Company	Company	Company	Company	1	3000	0	0	0	0	1	0	1	0	0	0	0	0	0	0	0	0	0	0	0	0	1	0	1	Article
47686035	Global epidemiology of Barrett's esophagus	EXPERT REVIEW OF GASTROENTEROLOGY & HEPATOLOGY	2	1	Toll access article	Toll access	2	Ang-TL	Ang	Tiing Leong	Author	1	CHANGI-GEN-HOSP	CHANGI-GEN-HOSP	CHANGI-GEN-HOSP	Hospital	Hospital	Hospital	Hospital	1	0	0	0	0	0	0	1	0	0	1	0	0	0	0	0	0	0	0	0	0	0	0	0	1	Review
48863239	Global epidemiology of HIV infection in men who have sex with men	LANCET	7	6	Green OA article	Green OA	7	Brookmeyer-R	Brookmeyer	Ron	Author	6	UNIV-CALIF-LOS-ANGELES	UCLA	UCLA	University	University - Rank 001-025	University - Rank 001-025	University - Rank 001-025	1	0	0	0	0	1	0	0	0	0	0	0	0	0	1	0	0	0	0	0	0	1	0	1	0	Article
53424960	Global epidemiology of atrial fibrillation	NATURE REVIEWS CARDIOLOGY	3	3	Toll access article	Toll access	3	Benjamin-EJ	Benjamin	Emelia J.	Author, Reprint Author	3	FRAMINGHAM-HEART-DIS-EPIDEMIOL-STUDY	FRAMINGHAM-HEART-DIS-EPIDEMIOL-STUDY	FRAMINGHAM-HEART-DIS-EPIDEMIOL-STUDY	Research institute	Research Institute	Research Institute	Research Institute	1	0	0	0	0	0	0	1	0	0	0	0	1	0	0	0	0	0	0	0	0	0	0	0	1	Review
48333856	Global epidemiology of hepatitis B virus infection: New estimates of age-specific HBsAg seroprevalence and endemicity	VACCINE	4	2	Hybrid article	Hybrid	4	Wiersma-ST	Wiersma	S. T.	Author, Reprint Author	1	WORLD-HLTH-ORG	WHO	WHO	Non-profit	Non-profit	Non-profit	Non-profit	1	2150	0	0	0	0	1	0	0	0	0	1	0	0	0	0	0	0	0	0	0	0	1	0	1	Article
45257873	Global eradication of poliomyelitis: Is the end of the campaign in sight?	JOURNAL OF PAEDIATRICS AND CHILD HEALTH	1	1	Toll access article	Toll access	1	Adams-T	Adams	Tony	Author, Reprint Author	1	WHO	WHO	WHO	Non-profit	Non-profit	Non-profit	Non-profit	1	0	0	0	0	0	0	1	0	0	0	1	0	0	0	0	0	0	0	0	0	0	0	0	1	Article
52264590	Global estimates of diabetes prevalence for 2013 and projections for 2035	DIABETES RESEARCH AND CLINICAL PRACTICE	6	4	Green OA article	Green OA	6	Shaw-JE	Shaw	J. E.	Author	4	BAKER-IDI-HEART-&-DIABET-INST	BAKER-IDI-HEART-&-DIABET-INST	BAKER-IDI-HEART-&-DIABET-INST	Research institute	Research Institute	Research Institute	Research Institute	1	0	0	0	0	1	0	0	0	0	0	0	1	0	0	0	0	0	0	0	0	0	0	0	1	Article
44114913	Global estimates of the prevalence of diabetes for 2010 and 2030	DIABETES RESEARCH AND CLINICAL PRACTICE	3	1	Toll access article	Toll access	3	Zimmet-PZ	Zimmet	P. Z.	Author	1	BAKER-IDI-HEART-&-DIABET-INST	BAKER-IDI-HEART-&-DIABET-INST	BAKER-IDI-HEART-&-DIABET-INST	Research institute	Research Institute	Research Institute	Research Institute	1	0	0	0	0	0	0	1	0	0	0	0	1	0	0	0	0	0	0	0	0	0	0	0	1	Article
52264593	Global estimates of the prevalence of hyperglycaemia in pregnancy	DIABETES RESEARCH AND CLINICAL PRACTICE	5	3	Green OA article	Green OA	5	Cho-NH	Cho	N. H.	Author	3	AJOU-UNIV	AJOU-UNIV	AJOU-UNIV	University	University - Rank 501+	University - Rank 501+	University - Rank 501+	1	0	0	0	0	1	0	0	0	0	0	0	0	0	0	0	0	0	0	1	0	1	0	0	1	Article
52264591	Global estimates of undiagnosed diabetes in adults	DIABETES RESEARCH AND CLINICAL PRACTICE	4	2	Green OA article	Green OA	4	Motala-AA	Motala	Ayesha A.	Author	2	UNIV-KWAZULU-NATAL	UNIV-KWAZULU-NATAL	UNIV-KWAZULU-NATAL	University	University - Rank 501+	University - Rank 501+	University - Rank 501+	1	0	0	0	0	1	0	0	0	0	0	0	0	0	0	0	0	0	0	1	0	1	0	0	1	Article
48372451	Global estimates of visual impairment: 2010	BRITISH JOURNAL OF OPHTHALMOLOGY	2	1	Toll access article	Toll access	2	Mariotti-SP	Mariotti	Silvio Paolo	Author	1	WORLD-HLTH-ORG	WHO	WHO	Non-profit	Non-profit	Non-profit	Non-profit	1	0	0	0	0	0	0	1	0	0	0	1	0	0	0	0	0	0	0	0	0	0	0	0	1	Article
51565211	Global health 2035: a world converging within a generation	LANCET	25	24	Green OA article	Green OA	25	Yamey-G	Yamey	Gavin	Author, Reprint Author	11	UNIV-CALIF-SAN-FRANCISCO	UCSF	UCSF	University	University - Rank 001-025	University - Rank 001-025	University - Rank 001-025	1	0	0	0	0	1	0	0	0	0	0	0	0	0	1	0	0	0	0	0	0	1	0	1	0	Review
50929540	Global health actors no longer in favor of user fees: a documentary study	GLOBALIZATION AND HEALTH	2	2	Gold OA article (APC)	Gold OA	2	Ridde-V	Ridde	Valery	Author	1	UNIV-MONTREAL	UNIV-MONTREAL	UNIV-MONTREAL	University	University - Rank 101-200	University - Rank 101-200	University - Rank 101-200	1	2145	0	1	0	0	0	0	0	0	0	0	0	0	0	0	0	1	0	0	0	1	1	0	1	Article
53637413	Global health and cardiovascular disease	HEART	4	3	Green OA article	Green OA	4	Ribeiro-ALP	Ribeiro	Antonio L. P.	Author, Reprint Author	1	UNIV-FED-MINAS-GERAIS	UNIV-FED-MINAS-GERAIS	UNIV-FED-MINAS-GERAIS	University	University - Rank 501+	University - Rank 501+	University - Rank 501+	1	0	0	0	0	1	0	0	0	0	0	0	0	0	0	0	0	0	0	1	0	1	0	0	1	Article
46463787	Global health and climate change: moving from denial and catastrophic fatalism to positive action	PHILOSOPHICAL TRANSACTIONS OF THE ROYAL SOCIETY A-MATHEMATICAL PHYSICAL AND ENGINEERING SCIENCES	5	4	Toll access article	Toll access	5	Ekins-P	Ekins	Paul	Author	3	UCL	UCL	UCL	University	University - Rank 001-025	University - Rank 001-025	University - Rank 001-025	1	0	0	0	0	0	0	1	0	0	0	0	0	0	1	0	0	0	0	0	0	1	0	1	0	Article
48945507	Global health and national borders: the ethics of foreign aid in a time of financial crisis	GLOBALIZATION AND HEALTH	4	4	Gold OA article (APC)	Gold OA	4	Schrecker-T	Schrecker	Ted	Author	4	UNIV-OTTAWA	UNIV-OTTAWA	UNIV-OTTAWA	University	University - Rank 201-500	University - Rank 201-500	University - Rank 201-500	1	2145	0	1	0	0	0	0	0	0	0	0	0	0	0	0	0	0	1	0	0	1	1	0	1	Article
44280924	Global health and social responsibility: a pilot project of the Medical University of Vienna in eastern Ethiopia	WIENER KLINISCHE WOCHENSCHRIFT	5	4	Green OA article	Green OA	5	Ramharter-M	Ramharter	Michael	Author, Reprint Author	1	MED-UNIV-VIENNA	MED-UNIV-VIENNA	MED-UNIV-VIENNA	University	University: Unranked	University: Unranked	University: Unranked	1	0	0	0	0	1	0	0	0	0	0	0	0	0	0	0	0	0	0	0	1	1	0	0	1	Article
45962526	Global health competencies and approaches in medical education: a literature review	BMC MEDICAL EDUCATION	9	1	Gold OA article (APC)	Gold OA	9	Brewer-TF	Brewer	Timothy F.	Author, Reprint Author	1	MCGILL-UNIV	MCGILL-UNIV	MCGILL-UNIV	University	University - Rank 026-050	University - Rank 026-050	University - Rank 026-050	1	2145	0	1	0	0	0	0	0	0	0	0	0	0	0	1	0	0	0	0	0	1	1	1	0	Review
50230549	Global health diplomacy: An integrative review of the literature and implications for nursing	NURSING OUTLOOK	7	10	Toll access article	Toll access	7	Powell-D	Powell	Dorothy	Author	10	DUKE-UNIV	DUKE-UNIV	DUKE-UNIV	University	University - Rank 001-025	University - Rank 001-025	University - Rank 001-025	1	0	0	0	0	0	0	1	0	0	0	0	0	0	1	0	0	0	0	0	0	1	0	1	0	Review
53521766	Global health diplomacy: Barriers to inserting health into Canadian foreign policy	GLOBAL PUBLIC HEALTH	3	1	Green OA article	Green OA	3	Ruckert-A	Ruckert	Arne	Author, Reprint Author	1	UNIV-OTTAWA	UNIV-OTTAWA	UNIV-OTTAWA	University	University - Rank 201-500	University - Rank 201-500	University - Rank 201-500	1	0	0	0	0	1	0	0	0	0	0	0	0	0	0	0	0	0	1	0	0	1	0	0	1	Article
50430176	Global health education in US Medical schools	BMC MEDICAL EDUCATION	13	15	Gold OA article (APC)	Gold OA	13	Wright-S	Wright	Stephen	Author	15	LONDON-SCH-HYG-&-TROP-MED	UCL	UCL	University	University - Rank 001-025	University - Rank 001-025	University - Rank 001-025	1	2145	0	1	0	0	0	0	0	0	0	0	0	0	1	0	0	0	0	0	0	1	1	1	0	Article
50408365	Global health education: a pilot in trans-disciplinary, digital instruction	GLOBAL HEALTH ACTION	3	5	Gold OA article (APC)	Gold OA	3	Kuhn-V	Kuhn	Virginia	Author	5	UNIV-SO-CALIF	UNIV-SO-CALIF	UNIV-SO-CALIF	University	University - Rank 051-100	University - Rank 51-100	University - Rank 051-100	1	1500	0	1	0	0	0	0	0	0	0	0	0	0	0	0	1	0	0	0	0	1	1	0	1	Article
52100339	Global health ethics: an introduction to prominent theories and relevant topics	GLOBAL HEALTH ACTION	5	3	Gold OA article (APC)	Gold OA	5	Popa-D	Popa	Daniela	Author	2	MAASTRICHT-UNIV	MAASTRICHT-UNIV	MAASTRICHT-UNIV	University	University - Rank 051-100	University - Rank 51-100	University - Rank 051-100	1	1500	0	1	0	0	0	0	0	0	0	0	0	0	0	0	1	0	0	0	0	1	1	0	1	Review
50482391	Global health experiences of U.S. Physicians: a mixed methods survey of clinician-researchers and health policy leaders	GLOBALIZATION AND HEALTH	5	7	Gold OA article (APC)	Gold OA	5	Padela-AI	Padela	Aasim I.	Author	6	UNIV-CHICAGO	UNIV-CHICAGO	UNIV-CHICAGO	University	University - Rank 001-025	University - Rank 001-025	University - Rank 001-025	1	2145	0	1	0	0	0	0	0	0	0	0	0	0	1	0	0	0	0	0	0	1	1	1	0	Article
52475398	Global health impacts of policies: lessons from the UK	GLOBALIZATION AND HEALTH	4	4	Gold OA article (APC)	Gold OA	4	Watt-NF	Watt	Nicola F.	Author, Reprint Author	4	LONDON-SCH-HYG-&-TROP-MED	UCL	UCL	University	University - Rank 001-025	University - Rank 001-025	University - Rank 001-025	1	2145	0	1	0	0	0	0	0	0	0	0	0	0	1	0	0	0	0	0	0	1	1	1	0	Article
52100372	Global health in the 21st century	GLOBAL HEALTH ACTION	2	4	Gold OA article (APC)	Gold OA	2	Brand-H	Brand	Helmut	Author	3	ASPHER	ASPHER	ASPHER	Scientific association	Scientific association	Scientific association	Scientific association	1	1500	0	1	0	0	0	0	0	0	0	0	0	1	0	0	0	0	0	0	0	0	1	0	1	Review
52100813	Global health in the European Union - a review from an agenda-setting perspective	GLOBAL HEALTH ACTION	3	3	Gold OA article (APC)	Gold OA	3	Brand-H	Brand	Helmut	Author	1	MAASTRICHT-UNIV	MAASTRICHT-UNIV	MAASTRICHT-UNIV	University	University - Rank 051-100	University - Rank 51-100	University - Rank 051-100	1	1500	0	1	0	0	0	0	0	0	0	0	0	0	0	0	1	0	0	0	0	1	1	0	1	Review
50929541	Global health initiative investments and health systems strengthening: a content analysis of global fund investments	GLOBALIZATION AND HEALTH	5	6	Gold OA article (APC)	Gold OA	5	deSavigny-D	de Savigny	Don	Author	1	SWISS-TROP-&-PUBL-HLTH-INST	SWISS-TROP-&-PUBL-HLTH-INST	SWISS-TROP-&-PUBL-HLTH-INST	Research institute	Research Institute	Research Institute	Research Institute	1	2145	0	1	0	0	0	0	0	0	0	0	1	0	0	0	0	0	0	0	0	0	1	0	1	Article
49368576	Global health initiatives of US otolaryngology residency programs: 2011 global health initiatives survey results	LARYNGOSCOPE	2	1	Toll access article	Toll access	2	Sinacori-JT	Sinacori	John T.	Author	1	EASTERN-VIRGINIA-MED-SCH	EASTERN-VIRGINIA-MED-SCH	EASTERN-VIRGINIA-MED-SCH	University	University: Unranked	University: Unranked	University: Unranked	1	0	0	0	0	0	0	1	0	0	0	0	0	0	0	0	0	0	0	0	1	1	0	0	1	Article
50682349	Global health opportunities within pediatric subspecialty fellowship training programs: surveying the virtual landscape	BMC MEDICAL EDUCATION	5	4	Gold OA article (APC)	Gold OA	5	Schubert-C	Schubert	Charles	Author	1	UNIV-CINCINNATI	UNIV-CINCINNATI	UNIV-CINCINNATI	University	University - Rank 201-500	University - Rank 201-500	University - Rank 201-500	1	2145	0	1	0	0	0	0	0	0	0	0	0	0	0	0	0	0	1	0	0	1	1	0	1	Article
44966399	Global health or global wealth?	NATURE BIOTECHNOLOGY	2	2	Toll access article	Toll access	2	Singer-PA	Singer	Peter A.	Author	1	UNIV-HLTH-NETWORK	UNIV-HLTH-NETWORK	UNIV-HLTH-NETWORK	Research institute	Research Institute	Research Institute	Research Institute	1	0	0	0	0	0	0	1	0	0	0	0	1	0	0	0	0	0	0	0	0	0	0	0	1	Article
48041917	Global health outreach during anesthesiology residency in the United States: a survey of interest, barriers to participation, and proposed solutions	JOURNAL OF CLINICAL ANESTHESIA	6	1	Toll access article	Toll access	6	Fleisher-LA	Fleisher	Lee A.	Author	1	UNIV-PENN	UNIV-PENN	UNIV-PENN	University	University - Rank 001-025	University - Rank 001-025	University - Rank 001-025	1	0	0	0	0	0	0	1	0	0	0	0	0	0	1	0	0	0	0	0	0	1	0	1	0	Article
50366075	Global health post-2015: the case for universal health equity	GLOBAL HEALTH ACTION	1	1	Gold OA article (APC)	Gold OA	1	DAmbruoso-L	D'Ambruoso	Lucia	Author, Reprint Author	1	UMEA-UNIV	UMEA-UNIV	UMEA-UNIV	University	University - Rank 201-500	University - Rank 201-500	University - Rank 201-500	1	1500	0	1	0	0	0	0	0	0	0	0	0	0	0	0	0	0	1	0	0	1	1	0	1	Article
50212812	Global health risks and cosmopolitisation: from emergence to interference	SOCIOLOGY OF HEALTH & ILLNESS	1	1	Toll access article	Toll access	1	Figuie-M	Figuie	Muriel	Author, Reprint Author	1	CTR-COOPERAT-INT-RECH-AGRON-DEV	CTR-COOPERAT-INT-RECH-AGRON-DEV	CTR-COOPERAT-INT-RECH-AGRON-DEV	Research institute	Research Institute	Research Institute	Research Institute	1	0	0	0	0	0	0	1	0	0	0	0	1	0	0	0	0	0	0	0	0	0	0	0	1	Article
46038531	Global health security and the International Health Regulations	BMC PUBLIC HEALTH	4	2	Gold OA article (APC)	Gold OA	4	Aldighieri-S	Aldighieri	Sylvain	Author	1	PAN-AMER-HLTH-ORG	PAN-AMER-HLTH-ORG	PAN-AMER-HLTH-ORG	Non-profit	Non-profit	Non-profit	Non-profit	1	2145	0	1	0	0	0	0	0	0	0	1	0	0	0	0	0	0	0	0	0	0	1	0	1	Review
48516949	Global health training starts at home: A unique US-based global health clinical elective for residents	MEDICAL TEACHER	3	2	Hybrid article	Hybrid	2	Price-J	Price	Joan	Author	2	UNIV-PENN-HLTH-SYST	UNIV-PENN	HOSP-UNIV-PENN	Hospital	University - Rank 001-025	University-Hospital	Hospital	1	2950	0	0	0	0	1	0	0	0	1	0	0	0	0	0	0	0	0	0	0	0	1	0	1	Article
51320186	Global health: the importance of evidence-based medicine	BMC MEDICINE	6	7	Gold OA article (APC)	Gold OA	6	Jha-P	Jha	Prabhat	Author	7	ST-MICHAELS-HOSP-TORONTO	ST-MICHAELS-HOSP-TORONTO	ST-MICHAELS-HOSP-TORONTO	Hospital	University - Rank 001-025	University-Hospital	Hospital	1	2785	0	1	0	0	0	0	0	0	1	0	0	0	0	0	0	0	0	0	0	0	1	0	1	Article
44384093	Global impact of rotavirus vaccines	EXPERT REVIEW OF VACCINES	13	6	Green OA article	Green OA	13	Parashar-UD	Parashar	Umesh D.	Author	1	US-CDC	CDC	CDC	Government	Government	Government	Government	1	0	0	0	0	1	0	0	0	1	0	0	0	0	0	0	0	0	0	0	0	0	0	0	1	Review
51294198	Global lessons on transforming strategy into action to save mothers' lives	INTERNATIONAL JOURNAL OF GYNECOLOGY & OBSTETRICS	3	3	Toll access article	Toll access	3	Arulkumaran-S	Arulkumaran	Sabaratnam	Author	3	ST-GEORGES-HOSP-MED-SCH	ST-GEORGES-HOSP-MED-SCH	ST-GEORGES-HOSP-MED-SCH	Hospital	University - Rank 201-500	University-Hospital	Hospital	1	0	0	0	0	0	0	1	0	0	1	0	0	0	0	0	0	0	0	0	0	0	0	0	1	Article
53210583	Global malnutrition overlaps with pollinator-dependent micronutrient production	PROCEEDINGS OF THE ROYAL SOCIETY B-BIOLOGICAL SCIENCES	8	5	Green OA article	Green OA	8	Klein-AM	Klein	Alexandra-Maria	Author	5	UNIV-FREIBURG	UNIV-FREIBURG	UNIV-FREIBURG	University	University - Rank 051-100	University - Rank 51-100	University - Rank 051-100	1	0	0	0	0	1	0	0	0	0	0	0	0	0	0	0	1	0	0	0	0	1	0	0	1	Article
50029945	Global mapping of infectious disease	PHILOSOPHICAL TRANSACTIONS OF THE ROYAL SOCIETY B-BIOLOGICAL SCIENCES	11	7	Green OA article	Green OA	11	Gething-PW	Gething	Peter W.	Author	1	UNIV-OXFORD	UNIV-OXFORD	UNIV-OXFORD	University	University - Rank 001-025	University - Rank 001-025	University - Rank 001-025	1	0	0	0	0	1	0	0	0	0	0	0	0	0	1	0	0	0	0	0	0	1	0	1	0	Review
53949677	Global mental health and its discontents: An inquiry into the making of global and local scale	TRANSCULTURAL PSYCHIATRY	2	2	Green OA article	Green OA	2	Dsouza-NA	D'souza	Nicole A.	Author	2	MCGILL-UNIV	MCGILL-UNIV	MCGILL-UNIV	University	University - Rank 026-050	University - Rank 026-050	University - Rank 026-050	1	0	0	0	0	1	0	0	0	0	0	0	0	0	0	1	0	0	0	0	0	1	0	1	0	Article
53375327	Global mental health: perspectives from Ethiopia	GLOBAL HEALTH ACTION	2	3	Gold OA article (APC)	Gold OA	2	Thornicroft-G	Thornicroft	Graham	Author	3	KINGS-COLL-LONDON	KINGS-COLL-LONDON	KINGS-COLL-LONDON	University	University - Rank 026-050	University - Rank 026-050	University - Rank 026-050	1	1500	0	1	0	0	0	0	0	0	0	0	0	0	0	1	0	0	0	0	0	1	1	1	0	Article
47318100	Global mesothelioma deaths reported to the World Health Organization between 1994 and 2008	BULLETIN OF THE WORLD HEALTH ORGANIZATION	6	2	Gold OA article (non-APC)	Gold OA	6	Sorahan-T	Sorahan	Tom	Author	2	UNIV-BIRMINGHAM	UNIV-BIRMINGHAM	UNIV-BIRMINGHAM	University	University - Rank 101-200	University - Rank 101-200	University - Rank 101-200	1	0	0	0	1	0	0	0	0	0	0	0	0	0	0	0	0	1	0	0	0	1	0	0	1	Article
52606460	Global migration and the changing distribution of sickle haemoglobin: a quantitative study of temporal trends between 1960 and 2000	LANCET GLOBAL HEALTH	6	9	Gold OA article (APC)	Gold OA	6	Weatherall-DJ	Weatherall	David J.	Author	9	UNIV-OXFORD	UNIV-OXFORD	UNIV-OXFORD	University	University - Rank 001-025	University - Rank 001-025	University - Rank 001-025	1	5000	0	1	0	0	0	0	0	0	0	0	0	0	1	0	0	0	0	0	0	1	1	1	0	Article
53612760	Global mortality from conditions with skin manifestations	JOURNAL OF THE AMERICAN ACADEMY OF DERMATOLOGY	14	16	Toll access article	Toll access	14	Dellavalle-RP	Dellavalle	Robert P.	Author, Reprint Author	13	UNIV-COLORADO	UNIV-COLORADO-DENVER	UNIV-COLORADO-DENVER	University	University: Unranked	University: Unranked	University: Unranked	1	0	0	0	0	0	0	1	0	0	0	0	0	0	0	0	0	0	0	0	1	1	0	0	1	Article
52427240	Global numbers of infection and disease burden of soil transmitted helminth infections in 2010	PARASITES & VECTORS	4	3	Gold OA article (APC)	Gold OA	4	Brooker-SJ	Brooker	Simon J.	Author	1	LONDON-SCH-HYG-&-TROP-MED	UCL	UCL	University	University - Rank 001-025	University - Rank 001-025	University - Rank 001-025	1	2145	0	1	0	0	0	0	0	0	0	0	0	0	1	0	0	0	0	0	0	1	1	1	0	Article
46015115	Global oral health of older people - Call for public health action	COMMUNITY DENTAL HEALTH	4	3	Green OA article	Green OA	4	Ogawa-H	Ogawa	H.	Author	3	NIIGATA-UNIV	NIIGATA-UNIV	NIIGATA-UNIV	University	University - Rank 501+	University - Rank 501+	University - Rank 501+	1	0	0	0	0	1	0	0	0	0	0	0	0	0	0	0	0	0	0	1	0	1	0	0	1	Article
49713396	Global patient safety and antiretroviral drugdrug interactions in the resource-limited setting	JOURNAL OF ANTIMICROBIAL CHEMOTHERAPY	7	5	Hybrid article	Hybrid	7	Merry-C	Merry	Concepta	Author	3	MAKERERE-UNIV	MAKERERE-UNIV	MAKERERE-UNIV	University	University - Rank 201-500	University - Rank 201-500	University - Rank 201-500	1	3200	0	0	0	0	1	0	0	0	0	0	0	0	0	0	0	0	1	0	0	1	1	0	1	Article
49422492	Global patterns of water intake: how intake data affect recommendations	NUTRITION REVIEWS	1	1	Toll access article	Toll access	1	Shirreffs-SM	Shirreffs	Susan M.	Author, Reprint Author	1	UNIV-LOUGHBOROUGH	UNIV-LOUGHBOROUGH	UNIV-LOUGHBOROUGH	University	University - Rank 201-500	University - Rank 201-500	University - Rank 201-500	1	0	0	0	0	0	0	1	0	0	0	0	0	0	0	0	0	0	1	0	0	1	0	0	1	Review
44866362	Global perspective of legal abortion - Trends analysis and accessibility	BEST PRACTICE & RESEARCH IN CLINICAL OBSTETRICS & GYNAECOLOGY	2	1	Toll access article	Toll access	2	Self-MW	Self	Mourad W.	Author	1	UNIV-MANCHESTER	UNIV-MANCHESTER	UNIV-MANCHESTER	University	University - Rank 051-100	University - Rank 51-100	University - Rank 051-100	1	0	0	0	0	0	0	1	0	0	0	0	0	0	0	0	1	0	0	0	0	1	0	0	1	Article
52360950	Global pharmacogenomics: Where is the research taking us?	GLOBAL PUBLIC HEALTH	2	1	Green OA article	Green OA	2	WilliamsJones-B	Williams-Jones	Bryn	Author	1	UNIV-MONTREAL	UNIV-MONTREAL	UNIV-MONTREAL	University	University - Rank 101-200	University - Rank 101-200	University - Rank 101-200	1	0	0	0	0	1	0	0	0	0	0	0	0	0	0	0	0	1	0	0	0	1	0	0	1	Article
48835880	Global physical activity levels: surveillance progress, pitfalls, and prospects	LANCET	6	7	Green OA article	Green OA	6	Ekelund-U	Ekelund	Ulf	Author	6	MRC	MRC-UK	MRC-UK	Research institute	Research Institute	Research Institute	Research Institute	1	0	0	0	0	1	0	0	0	0	0	0	1	0	0	0	0	0	0	0	0	0	0	0	1	Article
52639594	Global polio perspective	NEUROLOGY	2	2	Green OA article	Green OA	2	Lipton-HL	Lipton	Howard L.	Author, Reprint Author	2	UNIV-ILLINOIS	UNIV-ILLINOIS-CHICAGO	UNIV-ILLINOIS-CHICAGO	University	University - Rank 201-500	University - Rank 201-500	University - Rank 201-500	1	0	0	0	0	1	0	0	0	0	0	0	0	0	0	0	0	0	1	0	0	1	0	0	1	Article
45223571	Global prevalence and trends of overweight and obesity among preschool children	AMERICAN JOURNAL OF CLINICAL NUTRITION	3	1	Hybrid article	Hybrid	3	Borghi-E	Borghi	Elaine	Author	1	WHO	WHO	WHO	Non-profit	Non-profit	Non-profit	Non-profit	1	5000	0	0	0	0	1	0	0	0	0	1	0	0	0	0	0	0	0	0	0	0	1	0	1	Article
52606463	Global prevalence of age-related macular degeneration and disease burden projection for 2020 and 2040: a systematic review and meta-analysis	LANCET GLOBAL HEALTH	7	7	Gold OA article (APC)	Gold OA	7	Wong-TY	Wong	Tien Yin	Author	1	SINGAPORE-NATL-EYE-CTR	SINGAPORE-NATL-EYE-CTR	SINGAPORE-NATL-EYE-CTR	Hospital	Hospital	Hospital	Hospital	1	5000	0	1	0	0	0	0	0	0	1	0	0	0	0	0	0	0	0	0	0	0	1	0	1	Article
50266801	Global prevalence of anxiety disorders: a systematic review and meta-regression	PSYCHOLOGICAL MEDICINE	4	3	Green OA article	Green OA	4	Whiteford-HA	Whiteford	H. A.	Author	1	QUEENSLAND-CTR-MENTAL-HLTH-RES	QUEENSLAND-CTR-MENTAL-HLTH-RES	QUEENSLAND-CTR-MENTAL-HLTH-RES	Research institute	Research Institute	Research Institute	Research Institute	1	0	0	0	0	1	0	0	0	0	0	0	1	0	0	0	0	0	0	0	0	0	0	0	1	Review
44534615	Global prevalence of chronic migraine: A systematic review	CEPHALALGIA	7	5	Green OA article	Green OA	7	Lipton-RB	Lipton	R. B.	Author	5	ALBERT-EINSTEIN-COLL-MED	ALBERT-EINSTEIN-COLL-MED	ALBERT-EINSTEIN-COLL-MED	University	University: Unranked	University: Unranked	University: Unranked	1	0	0	0	0	1	0	0	0	0	0	0	0	0	0	0	0	0	0	0	1	1	0	0	1	Review
51600264	Global progress towards eliminating gastrointestinal helminth infections	CURRENT OPINION IN GASTROENTEROLOGY	3	1	Toll access article	Toll access	3	Hotez-PJ	Hotez	Peter J.	Author, Reprint Author	1	BAYLOR-COLL-MED	BAYLOR-COLL-MED	BAYLOR-COLL-MED	University	University: Unranked	University: Unranked	University: Unranked	1	0	0	0	0	0	0	1	0	0	0	0	0	0	0	0	0	0	0	0	1	1	0	0	1	Review
48980313	Global public health leadership for the twenty-first century: Towards improved health of all populations	GLOBAL PUBLIC HEALTH	5	4	Toll access article	Toll access	5	Parker-R	Parker	Richard	Author	1	COLUMBIA-UNIV	COLUMBIA-UNIV	COLUMBIA-UNIV	University	University - Rank 001-025	University - Rank 001-025	University - Rank 001-025	1	0	0	0	0	0	0	1	0	0	0	0	0	0	1	0	0	0	0	0	0	1	0	1	0	Article
46715356	Global public health training in the UK: preparing for the future	JOURNAL OF PUBLIC HEALTH	3	3	Hybrid article	Hybrid	3	Mandeville-KL	Mandeville	Kate L.	Author	3	ROYAL-FREE-HOSP	ROYAL-FREE-HOSP	ROYAL-FREE-HOSP	Hospital	University - Rank 001-025	University-Hospital	Hospital	1	2400	0	0	0	0	1	0	0	0	1	0	0	0	0	0	0	0	0	0	0	0	1	0	1	Article
51301279	Global rates of glaucoma surgery	GRAEFES ARCHIVE FOR CLINICAL AND EXPERIMENTAL OPHTHALMOLOGY	3	4	Toll access article	Toll access	3	Weinreb-RN	Weinreb	Robert N.	Author	1	UNIV-CALIF-SAN-DIEGO	UNIV-CALIF-SAN-DIEGO	UNIV-CALIF-SAN-DIEGO	University	University - Rank 026-050	University - Rank 026-050	University - Rank 026-050	1	0	0	0	0	0	0	1	0	0	0	0	0	0	0	1	0	0	0	0	0	1	0	1	0	Article
44873254	Global reduction of cervical cancer with human papillomavirus vaccines: insights from the hepatitis B virus vaccine experience	SEXUAL HEALTH	3	5	Toll access article	Toll access	3	Kane-MA	Kane	Mark A.	Author	5	MERCER-ISL	MERCER-ISL	MERCER-ISL	Government	Government	Government	Government	1	0	0	0	0	0	0	1	0	1	0	0	0	0	0	0	0	0	0	0	0	0	0	0	1	Article
49790101	Global report on preterm birth and stillbirth (1 of 7): definitions, description of the burden and opportunities to improve data	BMC PREGNANCY AND CHILDBIRTH	5	5	Gold OA article (APC)	Gold OA	5	Stanton-C	Stanton	Cynthia	Author, Reprint Author	5	JOHNS-HOPKINS-BLOOMBERG-SCH-PUBL-HLTH	JOHNS-HOPKINS-UNIV	JOHNS-HOPKINS-UNIV	University	University - Rank 001-025	University - Rank 001-025	University - Rank 001-025	1	2145	0	1	0	0	0	0	0	0	0	0	0	0	1	0	0	0	0	0	0	1	1	1	0	Review
49790102	Global report on preterm birth and stillbirth (2 of 7): discovery science	BMC PREGNANCY AND CHILDBIRTH	3	3	Gold OA article (APC)	Gold OA	3	Nunes-TM	Nunes	Toni M.	Author	2	SEATTLE-CHILDRENS	SEATTLE-CHILDRENS-HOSP	SEATTLE-CHILDRENS-HOSP	Hospital	University - Rank 026-050	University-Hospital	Hospital	1	2145	0	1	0	0	0	0	0	0	1	0	0	0	0	0	0	0	0	0	0	0	1	0	1	Review
49790105	Global report on preterm birth and stillbirth (5 of 7): advocacy barriers and opportunities	BMC PREGNANCY AND CHILDBIRTH	4	3	Gold OA article (APC)	Gold OA	4	Rubens-CE	Rubens	Craig E.	Author, Reprint Author	2	SEATTLE-CHILDRENS	SEATTLE-CHILDRENS-HOSP	SEATTLE-CHILDRENS-HOSP	Hospital	University - Rank 026-050	University-Hospital	Hospital	1	2145	0	1	0	0	0	0	0	0	1	0	0	0	0	0	0	0	0	0	0	0	1	0	1	Review
49790107	Global report on preterm birth and stillbirth (7 of 7): mobilizing resources to accelerate innovative solutions (Global Action Agenda)	BMC PREGNANCY AND CHILDBIRTH	4	4	Gold OA article (APC)	Gold OA	4	Nunes-TM	Nunes	Toni M.	Author	1	GLOBAL-ALLIANCE-PREVENT-PREMATUR-&-STILLBIRTH	GLOBAL-ALLIANCE-PREVENT-PREMATUR-&-STILLBIRTH	GLOBAL-ALLIANCE-PREVENT-PREMATUR-&-STILLBIRTH	Non-profit	Non-profit	Non-profit	Non-profit	1	2145	0	1	0	0	0	0	0	0	0	1	0	0	0	0	0	0	0	0	0	0	1	0	1	Review
48188985	Global socioeconomic inequalities in tobacco use: internationally comparable estimates from the World Health Surveys	CANCER CAUSES & CONTROL	2	1	Toll access article	Toll access	2	McKinnon-B	McKinnon	Brittany	Author	1	MCGILL-UNIV	MCGILL-UNIV	MCGILL-UNIV	University	University - Rank 026-050	University - Rank 026-050	University - Rank 026-050	1	0	0	0	0	0	0	1	0	0	0	0	0	0	0	1	0	0	0	0	0	1	0	1	0	Article
51608998	Global stroke statistics	INTERNATIONAL JOURNAL OF STROKE	7	6	Green OA article	Green OA	7	Donnan-GA	Donnan	Geoffrey A.	Author	2	FLOREY-INST-NEUROSCI-&-MENTAL-HLTH	FLOREY-INST-NEUROSCI-&-MENTAL-HLTH	FLOREY-INST-NEUROSCI-&-MENTAL-HLTH	Research institute	Research Institute	Research Institute	Research Institute	1	0	0	0	0	1	0	0	0	0	0	0	1	0	0	0	0	0	0	0	0	0	0	0	1	Article
51282006	Global survey of healthcare practitioners' beliefs and practices around intrauterine contraceptive method use in nulliparous women	CONTRACEPTION	5	5	Toll access article	Toll access	5	Zite-NB	Zite	Nikki B.	Author	5	UNIV-TENNESSEE	UNIV-TENNESSEE	UNIV-TENNESSEE	University	University - Rank 201-500	University - Rank 201-500	University - Rank 201-500	1	0	0	0	0	0	0	1	0	0	0	0	0	0	0	0	0	0	1	0	0	1	0	0	1	Article
50790248	Global trends in neglected tropical disease control and elimination: impact on child health	ARCHIVES OF DISEASE IN CHILDHOOD	4	6	Toll access article	Toll access	4	Hotez-PJ	Hotez	Peter J.	Author	1	BAYLOR-COLL-MED	BAYLOR-COLL-MED	BAYLOR-COLL-MED	University	University: Unranked	University: Unranked	University: Unranked	1	0	0	0	0	0	0	1	0	0	0	0	0	0	0	0	0	0	0	0	1	1	0	0	1	Article
52729551	Global trends in the distribution of Candida species causing candidemia	CLINICAL MICROBIOLOGY AND INFECTION	1	4	Hybrid article	Hybrid	1	Guinea-J	Guinea	J.	Author, Reprint Author	1	UNIV-COMPLUTENSE-MADRID	UNIV-COMPLUTENSE-MADRID	UNIV-COMPLUTENSE-MADRID	University	University - Rank 501+	University - Rank 501+	University - Rank 501+	1	3000	0	0	0	0	1	0	0	0	0	0	0	0	0	0	0	0	0	1	0	1	1	0	1	Review
49982302	Global variation in the prevalence and incidence of major depressive disorder: a systematic review of the epidemiological literature	PSYCHOLOGICAL MEDICINE	7	5	Green OA article	Green OA	7	Whiteford-HA	Whiteford	H. A.	Author	1	UNIV-QUEENSLAND	UNIV-QUEENSLAND	UNIV-QUEENSLAND	University	University - Rank 051-100	University - Rank 51-100	University - Rank 051-100	1	0	0	0	0	1	0	0	0	0	0	0	0	0	0	0	1	0	0	0	0	1	0	0	1	Review
53187283	Global, regional, and national incidence and mortality for HIV, tuberculosis, and malaria during 1990-2013: a systematic analysis for the Global Burden of Disease Study 2013	LANCET	366	303	Green OA article	Green OA	366	Vos-T	Vos	Theo	Author	1	UNIV-WASHINGTON	UNIV-WASHINGTON	UNIV-WASHINGTON	University	University - Rank 026-050	University - Rank 026-050	University - Rank 026-050	1	0	0	0	0	1	0	0	0	0	0	0	0	0	0	1	0	0	0	0	0	1	0	1	0	Article
53187282	Global, regional, and national levels and causes of maternal mortality during 1990-2013: a systematic analysis for the Global Burden of Disease Study 2013	LANCET	349	280	Green OA article	Green OA	349	Lozano-R	Lozano	Rafael	Author	1	UNIV-WASHINGTON	UNIV-WASHINGTON	UNIV-WASHINGTON	University	University - Rank 026-050	University - Rank 026-050	University - Rank 026-050	1	0	0	0	0	1	0	0	0	0	0	0	0	0	0	1	0	0	0	0	0	1	0	1	0	Article
53187281	Global, regional, and national levels of neonatal, infant, and under-5 mortality during 1990-2013: a systematic analysis for the Global Burden of Disease Study 2013	LANCET	230	177	Green OA article	Green OA	230	Murray-CJL	Murray	Christopher J. L.	Author	1	UNIV-WASHINGTON	UNIV-WASHINGTON	UNIV-WASHINGTON	University	University - Rank 026-050	University - Rank 026-050	University - Rank 026-050	1	0	0	0	0	1	0	0	0	0	0	0	0	0	0	1	0	0	0	0	0	1	0	1	0	Article
52606124	Global, regional, and national trends in haemoglobin concentration and prevalence of total and severe anaemia in children and pregnant and non-pregnant women for 1995-2011: a systematic analysis of population-representative data	LANCET GLOBAL HEALTH	9	8	Gold OA article (APC)	Gold OA	9	Ezzati-M	Ezzati	Majid	Author, Reprint Author	8	UNIV-LONDON-IMPERIAL-COLL-SCI-TECHNOL-&-MED	UNIV-LONDON-IMPERIAL-COLL-SCI-TECHNOL-&-MED	UNIV-LONDON-IMPERIAL-COLL-SCI-TECHNOL-&-MED	University	University - Rank 001-025	University - Rank 001-025	University - Rank 001-025	1	5000	0	1	0	0	0	0	0	0	0	0	0	0	1	0	0	0	0	0	0	1	1	1	0	Article
48062824	Globalisation and health inequalities: Can a human rights paradigm create space for civil society action?	SOCIAL SCIENCE & MEDICINE	2	2	Toll access article	Toll access	2	Schneider-H	Schneider	Helen	Author	2	UNIV-WESTERN-CAPE	UNIV-WESTERN-CAPE	UNIV-WESTERN-CAPE	University	University - Rank 501+	University - Rank 501+	University - Rank 501+	1	0	0	0	0	0	0	1	0	0	0	0	0	0	0	0	0	0	0	1	0	1	0	0	1	Article
44123923	Globalisation and women's health in Sub-Saharan Africa: Would paying attention to women's occupational roles improve nutritional outcomes?	SCANDINAVIAN JOURNAL OF PUBLIC HEALTH	3	3	Toll access article	Toll access	3	Wamala-S	Wamala	Sarah	Author	3	KAROLINSKA-INST	KAROLINSKA-INST	KAROLINSKA-INST	University	University - Rank 026-050	University - Rank 026-050	University - Rank 026-050	1	0	0	0	0	0	0	1	0	0	0	0	0	0	0	1	0	0	0	0	0	1	0	1	0	Review
53083061	Globalization of leptospirosis through travel and migration	GLOBALIZATION AND HEALTH	5	4	Gold OA article (APC)	Gold OA	5	Agampodi-S	Agampodi	Suneth	Author, Reprint Author	1	RAJARATA-UNIV-SRI-LANKA	RAJARATA-UNIV-SRI-LANKA	RAJARATA-UNIV-SRI-LANKA	University	University: Unranked	University: Unranked	University: Unranked	1	2145	0	1	0	0	0	0	0	0	0	0	0	0	0	0	0	0	0	0	1	1	1	0	1	Review
44680182	Goals and activities proposed by countries in seven regions of the world toward prevention of unsafe abortion	INTERNATIONAL JOURNAL OF GYNECOLOGY & OBSTETRICS	4	4	Toll access article	Toll access	4	Faundes-A	Faundes	Anibal	Author, Reprint Author	1	CTR-RES-REPROD-HLTH-CAMPINAS-CEMICAMP	CTR-RES-REPROD-HLTH-CAMPINAS-CEMICAMP	CTR-RES-REPROD-HLTH-CAMPINAS-CEMICAMP	Research institute	Research Institute	Research Institute	Research Institute	1	0	0	0	0	0	0	1	0	0	0	0	1	0	0	0	0	0	0	0	0	0	0	0	1	Article
49819102	Good governance in 'One Health' approaches	REVUE SCIENTIFIQUE ET TECHNIQUE DE L OFFICE INTERNATIONAL DES EPIZOOTIES	2	2	Green OA article	Green OA	2	Nunn-M	Nunn	M.	Author	2	AUSTRALIAN-GOVT-DEPT-AGR-FISHERIES-&-FORESTRY	AUSTRALIAN-GOVT-DEPT-AGR-FISHERIES-&-FORESTRY	AUSTRALIAN-GOVT-DEPT-AGR-FISHERIES-&-FORESTRY	Government	Government	Government	Government	1	0	0	0	0	1	0	0	0	1	0	0	0	0	0	0	0	0	0	0	0	0	0	0	1	Article
49819092	Good veterinary governance: definition, measurement and challenges	REVUE SCIENTIFIQUE ET TECHNIQUE DE L OFFICE INTERNATIONAL DES EPIZOOTIES	3	3	Toll access article	Toll access	3	Dehove-A	Dehove	A.	Author	3	WORLD-ORG-ANIM-HLTH-OIE	WORLD-ORG-ANIM-HLTH	WORLD-ORG-ANIM-HLTH	Non-profit	Non-profit	Non-profit	Non-profit	1	0	0	0	0	0	0	1	0	0	0	1	0	0	0	0	0	0	0	0	0	0	0	0	1	Article
47989357	Governing for a Healthy Population: Towards an Understanding of How Decision-Making Will Determine Our Global Health in a Changing Climate	INTERNATIONAL JOURNAL OF ENVIRONMENTAL RESEARCH AND PUBLIC HEALTH	6	4	Gold OA article (APC)	Gold OA	6	McMichael-AJ	McMichael	Anthony J.	Author	1	AUSTRALIAN-NATL-UNIV	AUSTRALIAN-NATL-UNIV	AUSTRALIAN-NATL-UNIV	University	University - Rank 026-050	University - Rank 026-050	University - Rank 026-050	1	1650.72	0	1	0	0	0	0	0	0	0	0	0	0	0	1	0	0	0	0	0	1	1	1	0	Article
51888826	Great expectations for the World Health Organization: a Framework Convention on Global Health to achieve universal health coverage	PUBLIC HEALTH	6	5	Toll access article	Toll access	6	Friedman-EA	Friedman	E. A.	Author	5	GEORGETOWN-UNIV	GEORGETOWN-UNIV	GEORGETOWN-UNIV	University	University - Rank 101-200	University - Rank 101-200	University - Rank 101-200	1	0	0	0	0	0	0	1	0	0	0	0	0	0	0	0	0	1	0	0	0	1	0	0	1	Review
44480388	Growing Epidemic of Coronary Heart Disease in Low- and Middle-Income Countries	CURRENT PROBLEMS IN CARDIOLOGY	5	6	Green OA article	Green OA	5	Murphy-A	Murphy	Adrianna	Author	6	HARVARD-UNIV	HARVARD-UNIV	HARVARD-UNIV	University	University - Rank 001-025	University - Rank 001-025	University - Rank 001-025	1	0	0	0	0	1	0	0	0	0	0	0	0	0	1	0	0	0	0	0	0	1	0	1	0	Review
50326678	Guidelines for Safety of Trainees Rotating Abroad: Consensus Recommendations from the Global Emergency Medicine Academy of the Society for Academic Emergency Medicine, Council of Emergency Medicine Residency Directors, and the Emergency Medicine Residents' Association	ACADEMIC EMERGENCY MEDICINE	10	9	Hybrid article	Hybrid	10	Martin-IBK	Martin	Ian B. K.	Author	8	UNIV-N-CAROLINA	UNIV-N-CAROLINA	UNIV-N-CAROLINA	University	University - Rank 051-100	University - Rank 51-100	University - Rank 051-100	1	3000	0	0	0	0	1	0	0	0	0	0	0	0	0	0	1	0	0	0	0	1	1	0	1	Article
48854404	Guiding principles for the development of global health education curricula in undergraduate medical education	MEDICAL TEACHER	4	3	Hybrid article	Hybrid	4	Margolis-CZ	Margolis	Carmi Z.	Author	3	BEN-GURION-UNIV-NEGEV	BEN-GURION-UNIV-NEGEV	BEN-GURION-UNIV-NEGEV	University	University - Rank 501+	University - Rank 501+	University - Rank 501+	1	2950	0	0	0	0	1	0	0	0	0	0	0	0	0	0	0	0	0	1	0	1	1	0	1	Article
53249181	HEALTH INEQUALITIES AND INFECTIOUS DISEASE EPIDEMICS: A CHALLENGE FOR GLOBAL HEALTH SECURITY	BIOSECURITY AND BIOTERRORISM-BIODEFENSE STRATEGY PRACTICE AND SCIENCE	2	3	Green OA article	Green OA	2	Kumar-S	Kumar	Supriya	Author	3	UNIV-PITTSBURGH	UNIV-PITTSBURGH	UNIV-PITTSBURGH	University	University - Rank 051-100	University - Rank 51-100	University - Rank 051-100	1	0	0	0	0	1	0	0	0	0	0	0	0	0	0	0	1	0	0	0	0	1	0	0	1	Article
48507806	HIV Infection and Coronary Heart Disease: An Intersection of Epidemics	JOURNAL OF INFECTIOUS DISEASES	1	2	Green OA article	Green OA	1	Triant-VA	Triant	Virginia A.	Author, Reprint Author	1	MASSACHUSETTS-GEN-HOSP	MASSACHUSETTS-GEN-HOSP	MASSACHUSETTS-GEN-HOSP	Hospital	University - Rank 001-025	University-Hospital	Hospital	1	0	0	0	0	1	0	0	0	0	1	0	0	0	0	0	0	0	0	0	0	0	0	0	1	Article
52097837	HIV scale-up in Mozambique: Exceptionalism, normalisation and global health	GLOBAL PUBLIC HEALTH	1	2	Green OA article	Green OA	1	Hog-E	Hog	Erling	Author, Reprint Author	1	UNIV-LONDON-LONDON-SCH-ECON-&-POLIT-SCI	LONDON-SCH-ECON	LONDON-SCH-ECON	University	University - Rank 001-025	University - Rank 001-025	University - Rank 001-025	1	0	0	0	0	1	0	0	0	0	0	0	0	0	1	0	0	0	0	0	0	1	0	1	0	Article
50286742	HOW MANY INFANTS LIKELY DIED IN AFRICA AS A RESULT OF THE 2008-2009 GLOBAL FINANCIAL CRISIS?	HEALTH ECONOMICS	2	2	Toll access article	Toll access	2	Schady-N	Schady	Norbert	Author	2	INTERAMER-DEV-BANK	INTERAMER-DEV-BANK	INTERAMER-DEV-BANK	Non-profit	Non-profit	Non-profit	Non-profit	1	0	0	0	0	0	0	1	0	0	0	1	0	0	0	0	0	0	0	0	0	0	0	0	1	Article
52212456	Head and Neck Cancer: Global Burden and Regional Trends in India	ASIAN PACIFIC JOURNAL OF CANCER PREVENTION	2	2	Gold OA article (non-APC)	Gold OA	2	Meherotra-R	Meherotra	Rohit	Author	2	RAMA-MED-COLL	RAMA-MED-COLL	RAMA-MED-COLL	University	University: Unranked	University: Unranked	University: Unranked	1	0	0	0	1	0	0	0	0	0	0	0	0	0	0	0	0	0	0	0	1	1	0	0	1	Review
49846569	Health 2020 - The New European Framework Strategy of WHO	GESUNDHEITSWESEN	2	1	Toll access article	Toll access	2	Brand-H	Brand	H.	Author	1	MAASTRICHT-UNIV	MAASTRICHT-UNIV	MAASTRICHT-UNIV	University	University - Rank 051-100	University - Rank 51-100	University - Rank 051-100	1	0	0	0	0	0	0	1	0	0	0	0	0	0	0	0	1	0	0	0	0	1	0	0	1	Article
47653231	Health Services Research and Global Health	HEALTH SERVICES RESEARCH	6	6	Green OA article	Green OA	6	Curry-L	Curry	Leslie	Author	1	YALE-UNIV	YALE-UNIV	YALE-UNIV	University	University - Rank 001-025	University - Rank 001-025	University - Rank 001-025	1	0	0	0	0	1	0	0	0	0	0	0	0	0	1	0	0	0	0	0	0	1	0	1	0	Article
52241232	Health and Economic Benefits of Improved Injury Prevention and Trauma Care Worldwide	PLOS ONE	6	5	Gold OA article (APC)	Gold OA	6	Meara-JG	Meara	John G.	Author	2	HARVARD-UNIV	HARVARD-UNIV	HARVARD-UNIV	University	University - Rank 001-025	University - Rank 001-025	University - Rank 001-025	1	1495	0	1	0	0	0	0	0	0	0	0	0	0	1	0	0	0	0	0	0	1	1	1	0	Article
53045983	Health and Social Hann Related Alcohol	REVISTA ESPANOLA DE SALUD PUBLICA	6	7	Gold OA article (non-APC)	Gold OA	6	Barrio-G	Barrio	Gregorio	Author	7	INST-SALUD-CARLOS-III	INST-SALUD-CARLOS-III	INST-SALUD-CARLOS-III	Research institute	Research Institute	Research Institute	Research Institute	1	0	0	0	1	0	0	0	0	0	0	0	1	0	0	0	0	0	0	0	0	0	0	0	1	Article
46128327	Health biotechnology innovation on a global stage	NATURE REVIEWS MICROBIOLOGY	4	4	Toll access article	Toll access	4	Daar-AS	Daar	Abdallah S.	Author	3	UNIV-HLTH-NETWORK	UNIV-HLTH-NETWORK	UNIV-HLTH-NETWORK	Research institute	Research Institute	Research Institute	Research Institute	1	0	0	0	0	0	0	1	0	0	0	0	1	0	0	0	0	0	0	0	0	0	0	0	1	Review
49849347	Health diplomacy the adaptation of global health interventions to local needs in sub-Saharan Africa and Thailand: evaluating findings from Project Accept (HPTN 043)	BMC PUBLIC HEALTH	17	10	Gold OA article (APC)	Gold OA	17	Morin-SF	Morin	Stephen F.	Author	1	UNIV-CALIF-SAN-FRANCISCO	UCSF	UCSF	University	University - Rank 001-025	University - Rank 001-025	University - Rank 001-025	1	2145	0	1	0	0	0	0	0	0	0	0	0	0	1	0	0	0	0	0	0	1	1	1	0	Article
52805913	Health diplomacy: a new approach to the Muslim world?	GLOBALIZATION AND HEALTH	3	3	Gold OA article (APC)	Gold OA	3	Kerr-DJ	Kerr	David J.	Author	3	UNIV-OXFORD	UNIV-OXFORD	UNIV-OXFORD	University	University - Rank 001-025	University - Rank 001-025	University - Rank 001-025	1	2145	0	1	0	0	0	0	0	0	0	0	0	0	1	0	0	0	0	0	0	1	1	1	0	Article
52100311	Health in global context; beyond the social determinants of health?	GLOBAL HEALTH ACTION	2	1	Gold OA article (APC)	Gold OA	2	Meershoek-A	Meershoek	Agnes	Author	1	MAASTRICHT-UNIV	MAASTRICHT-UNIV	MAASTRICHT-UNIV	University	University - Rank 051-100	University - Rank 51-100	University - Rank 051-100	1	1500	0	1	0	0	0	0	0	0	0	0	0	0	0	0	1	0	0	0	0	1	1	0	1	Review
48980318	Health systems and health equity: The challenge of the decade	GLOBAL PUBLIC HEALTH	2	4	Toll access article	Toll access	2	ElSadr-WM	El-Sadr	Wafaa M.	Author	2	COLUMBIA-UNIV	COLUMBIA-UNIV	COLUMBIA-UNIV	University	University - Rank 001-025	University - Rank 001-025	University - Rank 001-025	1	0	0	0	0	0	0	1	0	0	0	0	0	0	1	0	0	0	0	0	0	1	0	1	0	Article
51154241	Health technology assessments as a mechanism for increased value for money: recommendations to the Global Fund	GLOBALIZATION AND HEALTH	5	2	Gold OA article (APC)	Gold OA	5	Myint-CY	Myint	Chaw Yin	Author	1	MINIST-PUBL-HLTH	MINIST-PUBL-HLTH-THAILAND	MINIST-PUBL-HLTH-THAILAND	Government	Government	Government	Government	1	2145	0	1	0	0	0	0	0	1	0	0	0	0	0	0	0	0	0	0	0	0	1	0	1	Review
48605431	Health warnings on tobacco products: International practices	SALUD PUBLICA DE MEXICO	2	2	Gold OA article (non-APC)	Gold OA	2	Reid-JL	Reid	Jessica L.	Author	2	UNIV-WATERLOO	UNIV-WATERLOO	UNIV-WATERLOO	University	University - Rank 101-200	University - Rank 101-200	University - Rank 101-200	1	0	0	0	1	0	0	0	0	0	0	0	0	0	0	0	0	1	0	0	0	1	0	0	1	Review
49610477	Healthy life expectancy for 187 countries, 1990-2010: a systematic analysis for the Global Burden Disease Study 2010	LANCET	7	3	Toll access article	Toll access	7	Murray-CJL	Murray	Christopher J. L.	Author	2	UNIV-WASHINGTON	UNIV-WASHINGTON	UNIV-WASHINGTON	University	University - Rank 026-050	University - Rank 026-050	University - Rank 026-050	1	0	0	0	0	0	0	1	0	0	0	0	0	0	0	1	0	0	0	0	0	1	0	1	0	Article
47008627	Hepatitis A Infection in Recent International Adoptees and Their Contacts in Minnesota, 2007-2009	PEDIATRICS	4	1	Delayed OA article	Delayed OA	4	Lynfield-R	Lynfield	Ruth	Author	1	MINNESOTA-DEPT-HLTH	MINNESOTA-DEPT-HLTH	MINNESOTA-DEPT-HLTH	Government	Government	Government	Government	1	0	1	0	0	0	0	0	0	1	0	0	0	0	0	0	0	0	0	0	0	0	0	0	1	Article
52495740	Hepatitis C, A Global Issue: Access to Care and New Therapeutic and Preventive Approaches in Resource-Constrained Areas	SEMINARS IN LIVER DISEASE	2	1	Toll access article	Toll access	2	Thursz-M	Thursz	Mark	Author, Reprint Author	1	UNIV-LONDON-IMPERIAL-COLL-SCI-TECHNOL-&-MED	UNIV-LONDON-IMPERIAL-COLL-SCI-TECHNOL-&-MED	UNIV-LONDON-IMPERIAL-COLL-SCI-TECHNOL-&-MED	University	University - Rank 001-025	University - Rank 001-025	University - Rank 001-025	1	0	0	0	0	0	0	1	0	0	0	0	0	0	1	0	0	0	0	0	0	1	0	1	0	Review
44249590	Hepatocellular Carcinoma (HCC) A Global Perspective	JOURNAL OF CLINICAL GASTROENTEROLOGY	23	23	Green OA article	Green OA	23	LeMair-A	Le Mair	Anton	Author	23	HIGHLAND-DATA	HIGHLAND-DATA	HIGHLAND-DATA	Company	Company	Company	Company	1	0	0	0	0	1	0	0	1	0	0	0	0	0	0	0	0	0	0	0	0	0	0	0	1	Article
44824087	Hepatocellular carcinoma: a global view	NATURE REVIEWS GASTROENTEROLOGY & HEPATOLOGY	2	1	Green OA article	Green OA	2	Roberts-LR	Roberts	Lewis R.	Author, Reprint Author	1	MAYO-CLIN	MAYO-CLIN	MAYO-CLIN	Hospital	University - Rank 001-025	University-Hospital	Hospital	1	0	0	0	0	1	0	0	0	0	1	0	0	0	0	0	0	0	0	0	0	0	0	0	1	Review
48508023	Hierarchical cluster analysis of labour market regulations and population health: a taxonomy of low- and middle-income countries	BMC PUBLIC HEALTH	4	4	Gold OA article (APC)	Gold OA	4	Ng-E	Ng	Edwin	Author	2	UNIV-TORONTO	UNIV-TORONTO	UNIV-TORONTO	University	University - Rank 001-025	University - Rank 001-025	University - Rank 001-025	1	2145	0	1	0	0	0	0	0	0	0	0	0	0	1	0	0	0	0	0	0	1	1	1	0	Article
50382233	High Blood Pressure Selected as the Theme for World Health Day, April 7, 2013: Cup Half Full or Half Empty?	CANADIAN JOURNAL OF CARDIOLOGY	4	4	Toll access article	Toll access	4	Larochelle-P	Larochelle	Pierre	Author, Reprint Author	4	CLIN-RES-INST-MONTREAL	UNIV-MONTREAL	CLIN-RES-INST-MONTREAL	Hospital	University - Rank 101-200	University-Hospital	Hospital	1	0	0	0	0	0	0	1	0	0	1	0	0	0	0	0	0	0	0	0	0	0	0	0	1	Article
43915191	High Food Prices and the Global Financial Crisis Have Reduced Access to Nutritious Food and Worsened Nutritional Status and Health	JOURNAL OF NUTRITION	5	5	Hybrid article	Hybrid	5	Bloem-MW	Bloem	Martin W.	Author	1	WORLD-FOOD-PROGRAMME	WORLD-FOOD-PROGRAMME	WORLD-FOOD-PROGRAMME	Non-profit	Non-profit	Non-profit	Non-profit	1	5000	0	0	0	0	1	0	0	0	0	1	0	0	0	0	0	0	0	0	0	0	1	0	1	Article
49986550	High fructose corn syrup and diabetes prevalence: A global perspective	GLOBAL PUBLIC HEALTH	3	2	Toll access article	Toll access	3	Ventura-EE	Ventura	Emily E.	Author	1	UNIV-SO-CALIF	UNIV-SO-CALIF	UNIV-SO-CALIF	University	University - Rank 051-100	University - Rank 51-100	University - Rank 051-100	1	0	0	0	0	0	0	1	0	0	0	0	0	0	0	0	1	0	0	0	0	1	0	0	1	Article
52099424	Highlights From the FIPEd Global Education Report	AMERICAN JOURNAL OF PHARMACEUTICAL EDUCATION	11	10	Gold OA article (non-APC)	Gold OA	11	Tofade-T	Tofade	Toyin	Author	10	UNIV-MARYLAND	UNIV-MARYLAND	UNIV-MARYLAND	University	University - Rank 051-100	University - Rank 51-100	University - Rank 051-100	1	0	0	0	1	0	0	0	0	0	0	0	0	0	0	0	1	0	0	0	0	1	0	0	1	Article
48602839	Hookah Use: Going Down in Smoke	JOURNAL OF ADDICTIONS NURSING	3	1	Toll access article	Toll access	3	Armstrong-M	Armstrong	Merry	Author	1	WASHINGTON-STATE-UNIV	WASHINGTON-STATE-UNIV	WASHINGTON-STATE-UNIV	University	University - Rank 201-500	University - Rank 201-500	University - Rank 201-500	1	0	0	0	0	0	0	1	0	0	0	0	0	0	0	0	0	0	1	0	0	1	0	0	1	Article
49476167	Household Air Pollution Is a Major Avoidable Risk Factor for Cardiorespiratory Disease	CHEST	6	6	Toll access article	Toll access	6	Martin-WJ	Martin	William J.	Author, Reprint Author	1	EUNICE-KENNEDY-SHRIVER-NATL-INST-CHILD-HLTH-&-HUM	NIH	NIH	Government	Government	Government	Government	1	0	0	0	0	0	0	1	0	1	0	0	0	0	0	0	0	0	0	0	0	0	0	0	1	Article
44390639	How Common Is the Most Common Adult Movement Disorder? Update on the Worldwide Prevalence of Essential Tremor	MOVEMENT DISORDERS	2	5	Toll access article	Toll access	2	Ferreira-JJ	Ferreira	Joaquim J.	Author	5	INST-MOL-MED	INST-MOL-MED	INST-MOL-MED	Research institute	Research Institute	Research Institute	Research Institute	1	0	0	0	0	0	0	1	0	0	0	0	1	0	0	0	0	0	0	0	0	0	0	0	1	Review
43915188	How to Ensure Nutrition Security in the Global Economic Crisis to Protect and Enhance Development of Young Children and Our Common Future	JOURNAL OF NUTRITION	9	9	Hybrid article	Hybrid	9	Bloem-MW	Bloem	Martin W.	Author	1	WORLD-FOOD-PROGRAMME	WORLD-FOOD-PROGRAMME	WORLD-FOOD-PROGRAMME	Non-profit	Non-profit	Non-profit	Non-profit	1	5000	0	0	0	0	1	0	0	0	0	1	0	0	0	0	0	0	0	0	0	0	1	0	1	Article
52810197	How we developed a locally focused Global Health Clinical Preceptorship at Weill Cornell Medical College	MEDICAL TEACHER	5	2	Hybrid article	Hybrid	5	Fein-O	Fein	Oliver	Author	2	WEILL-CORNELL-MED-COLL	CORNELL-UNIV	CORNELL-UNIV	University	University - Rank 001-025	University - Rank 001-025	University - Rank 001-025	1	2950	0	0	0	0	1	0	0	0	0	0	0	0	1	0	0	0	0	0	0	1	1	1	0	Article
47928455	Human macroecology: linking pattern and process in big-picture human ecology	BIOLOGICAL REVIEWS OF THE CAMBRIDGE PHILOSOPHICAL SOCIETY	6	6	Green OA article	Green OA	6	Bettencourt-LMA	Bettencourt	Luis M. A.	Author	2	SANTA-FE-INST	SANTA-FE-INST	SANTA-FE-INST	Research institute	Research Institute	Research Institute	Research Institute	1	0	0	0	0	1	0	0	0	0	0	0	1	0	0	0	0	0	0	0	0	0	0	0	1	Article
53573534	Human migration is important in the international spread of exotic Salmonella serovars in animal and human populations	EPIDEMIOLOGY AND INFECTION	4	4	Green OA article	Green OA	4	Smith-DW	Smith	D. W.	Author	1	PATHWEST-LAB-MED-WA	PATHWEST-LAB-MED-WA	PATHWEST-LAB-MED-WA	Hospital	Hospital	Hospital	Hospital	1	0	0	0	0	1	0	0	0	0	1	0	0	0	0	0	0	0	0	0	0	0	0	0	1	Article
50778854	Human mobility and the worldwide impact of intentional localized highly pathogenic virus release	SCIENTIFIC REPORTS	3	4	Gold OA article (APC)	Gold OA	3	Vespignani-A	Vespignani	Alessandro	Author, Reprint Author	3	NORTHEASTERN-UNIV	NORTHEASTERN-UNIV	NORTHEASTERN-UNIV	University	University - Rank 101-200	University - Rank 101-200	University - Rank 101-200	1	1495	0	1	0	0	0	0	0	0	0	0	0	0	0	0	0	1	0	0	0	1	1	0	1	Article
48609071	Human rights in health systems frameworks: What is there, what is missing and why does it matter?	GLOBAL PUBLIC HEALTH	8	2	Toll access article	Toll access	8	Steiner-R	Steiner	Riley	Author	1	HARVARD-UNIV	HARVARD-UNIV	HARVARD-UNIV	University	University - Rank 001-025	University - Rank 001-025	University - Rank 001-025	1	0	0	0	0	0	0	1	0	0	0	0	0	0	1	0	0	0	0	0	0	1	0	1	0	Article
52877749	Hygiene and health: systematic review of handwashing practices worldwide and update of health effects	TROPICAL MEDICINE & INTERNATIONAL HEALTH	11	10	Hybrid article	Hybrid	11	Curtis-V	Curtis	Valerie	Author	2	LONDON-SCH-HYG-&-TROP-MED	UCL	UCL	University	University - Rank 001-025	University - Rank 001-025	University - Rank 001-025	1	3000	0	0	0	0	1	0	0	0	0	0	0	0	1	0	0	0	0	0	0	1	1	1	0	Review
47022899	IAGG Workshop: Health promotion program on prevention of late onset dementia	JOURNAL OF NUTRITION HEALTH & AGING	28	35	Green OA article	Green OA	28	Vellas-B	Vellas	B.	Author	35	TOULOUSE-UNIV-HOSP	TOULOUSE-UNIV-HOSP	TOULOUSE-UNIV-HOSP	Hospital	University: Unranked	University-Hospital	Hospital	1	0	0	0	0	1	0	0	0	0	1	0	0	0	0	0	0	0	0	0	0	0	0	0	1	Article
47698178	IDF Diabetes Atlas: Global estimates of the prevalence of diabetes for 2011 and 2030	DIABETES RESEARCH AND CLINICAL PRACTICE	4	1	Green OA article	Green OA	3	Weil-C	Weil	Clara	Author	1	INT-DIABET-FEDERAT	INT-DIABET-FEDERAT	INT-DIABET-FEDERAT	Non-profit	Non-profit	Non-profit	Non-profit	1	0	0	0	0	1	0	0	0	0	0	1	0	0	0	0	0	0	0	0	0	0	0	0	1	Article
46093969	INTERNATIONAL MONETARY FUND AND AID DISPLACEMENT	INTERNATIONAL JOURNAL OF HEALTH SERVICES	3	4	Green OA article	Green OA	3	McKee-M	McKee	Martin	Author	4	LONDON-SCH-HYG-&-TROP-MED	UCL	UCL	University	University - Rank 001-025	University - Rank 001-025	University - Rank 001-025	1	0	0	0	0	1	0	0	0	0	0	0	0	0	1	0	0	0	0	0	0	1	0	1	0	Article
50350469	INTRODUCTION: Global Health Challenges and the Role of Law	JOURNAL OF LAW MEDICINE & ETHICS	2	3	Toll access article	Toll access	2	Lemmens-T	Lemmens	Trudo	Author	1	UNIV-TORONTO	UNIV-TORONTO	UNIV-TORONTO	University	University - Rank 001-025	University - Rank 001-025	University - Rank 001-025	1	0	0	0	0	0	0	1	0	0	0	0	0	0	1	0	0	0	0	0	0	1	0	1	0	Article
50303275	ISHLT International Registry for Heart and Lung Transplantation - three decades of scientific contributions	TRANSPLANTATION REVIEWS	8	6	Toll access article	Toll access	8	Hertz-MI	Hertz	Marshall I.	Author	6	UNIV-MINNESOTA	UNIV-MINNESOTA	UNIV-MINNESOTA	University	University - Rank 051-100	University - Rank 51-100	University - Rank 051-100	1	0	0	0	0	0	0	1	0	0	0	0	0	0	0	0	1	0	0	0	0	1	0	0	1	Article
47355920	Identifying important breast cancer control strategies in Asia, Latin America and the Middle East/North Africa	BMC HEALTH SERVICES RESEARCH	7	7	Gold OA article (APC)	Gold OA	7	Buchanan-DR	Buchanan	David R.	Author	7	UNIV-MASSACHUSETTS	UNIV-MASSACHUSETTS	UNIV-MASSACHUSETTS	University	University - Rank 101-200	University - Rank 101-200	University - Rank 101-200	1	2145	0	1	0	0	0	0	0	0	0	0	0	0	0	0	0	1	0	0	0	1	1	0	1	Article
51156932	Impact of 2008 global economic crisis on suicide: time trend study in 54 countries	BMJ-BRITISH MEDICAL JOURNAL	4	6	Green OA article	Green OA	4	Gunnell-D	Gunnell	David	Author	2	UNIV-BRISTOL	UNIV-BRISTOL	UNIV-BRISTOL	University	University - Rank 051-100	University - Rank 51-100	University - Rank 051-100	1	0	0	0	0	1	0	0	0	0	0	0	0	0	0	0	1	0	0	0	0	1	0	0	1	Article
47164654	Impact of Global Health Residency Training on Medical Knowledge of Immigrant Health	AMERICAN JOURNAL OF TROPICAL MEDICINE AND HYGIENE	6	4	Green OA article	Green OA	6	Boulware-DR	Boulware	David R.	Author, Reprint Author	1	UNIV-MINNESOTA	UNIV-MINNESOTA	UNIV-MINNESOTA	University	University - Rank 051-100	University - Rank 51-100	University - Rank 051-100	1	0	0	0	0	1	0	0	0	0	0	0	0	0	0	0	1	0	0	0	0	1	0	0	1	Article
50742932	Impact of a Global Mental Health Program on a Residency Training Program	ACADEMIC PSYCHIATRY	2	1	Toll access article	Toll access	2	Rohrbaugh-RM	Rohrbaugh	Robert M.	Author	1	YALE-UNIV	YALE-UNIV	YALE-UNIV	University	University - Rank 001-025	University - Rank 001-025	University - Rank 001-025	1	0	0	0	0	0	0	1	0	0	0	0	0	0	1	0	0	0	0	0	0	1	0	1	0	Article
49811856	Impact of socioeconomic gradients within and between countries on health of patients with rheumatoid arthritis (RA): Lessons from QUEST RA	BEST PRACTICE & RESEARCH IN CLINICAL RHEUMATOLOGY	4	5	Toll access article	Toll access	4	Boonen-A	Boonen	Annelies	Author	5	MAASTRICHT-UNIV	MAASTRICHT-UNIV	MAASTRICHT-UNIV	University	University - Rank 051-100	University - Rank 51-100	University - Rank 051-100	1	0	0	0	0	0	0	1	0	0	0	0	0	0	0	0	1	0	0	0	0	1	0	0	1	Article
51893661	Impacts of globalisation on foodborne parasites	TRENDS IN PARASITOLOGY	5	4	Toll access article	Toll access	5	Fayer-R	Fayer	Ron	Author	4	ARS	ARS	ARS	Government	Government	Government	Government	1	0	0	0	0	0	0	1	0	1	0	0	0	0	0	0	0	0	0	0	0	0	0	0	1	Review
49930695	Implementation of the World Report on Disability: Developing human resource capacity to meet the needs of people with communication disability in Uganda	INTERNATIONAL JOURNAL OF SPEECH-LANGUAGE PATHOLOGY	2	2	Green OA article	Green OA	2	Marshall-J	Marshall	Julie	Author, Reprint Author	2	MANCHESTER-METROPOLITAN-UNIV	MANCHESTER-METROPOLITAN-UNIV	MANCHESTER-METROPOLITAN-UNIV	University	University - Rank 501+	University - Rank 501+	University - Rank 501+	1	0	0	0	0	1	0	0	0	0	0	0	0	0	0	0	0	0	0	1	0	1	0	0	1	Article
52475407	Implementing Global Fund programs: a survey of opinions and experiences of the Principal Recipients across 69 countries	GLOBALIZATION AND HEALTH	3	2	Gold OA article (APC)	Gold OA	3	McCoy-D	McCoy	David	Author	1	AIDSPAN	AIDSPAN	AIDSPAN	Non-profit	Non-profit	Non-profit	Non-profit	1	2145	0	1	0	0	0	0	0	0	0	1	0	0	0	0	0	0	0	0	0	0	1	0	1	Article
51044319	Implementing clinical guidelines in low-income settings: A review of literature	GLOBAL PUBLIC HEALTH	6	4	Toll access article	Toll access	6	Bradley-EH	Bradley	Elizabeth H.	Author, Reprint Author	2	YALE-UNIV	YALE-UNIV	YALE-UNIV	University	University - Rank 001-025	University - Rank 001-025	University - Rank 001-025	1	0	0	0	0	0	0	1	0	0	0	0	0	0	1	0	0	0	0	0	0	1	0	1	0	Article
48023552	Implementing clinical trials on an international platform: Challenges and perspectives	JOURNAL OF THE NEUROLOGICAL SCIENCES	7	5	Green OA article	Green OA	7	Cutter-G	Cutter	Gary	Author	1	UNIV-ALABAMA	UNIV-ALABAMA-BIRMINGHAM	UNIV-ALABAMA-BIRMINGHAM	University	University: Unranked	University: Unranked	University: Unranked	1	0	0	0	0	1	0	0	0	0	0	0	0	0	0	0	0	0	0	0	1	1	0	0	1	Review
49930704	Implementing recommendations of the World Report on Disability for indigenous populations	INTERNATIONAL JOURNAL OF SPEECH-LANGUAGE PATHOLOGY	1	1	Green OA article	Green OA	1	Westby-C	Westby	Carol	Author, Reprint Author	1	BILINGUAL-MULTICULTURAL-SERV	BILINGUAL-MULTICULTURAL-SERV	BILINGUAL-MULTICULTURAL-SERV	Government	Government	Government	Government	1	0	0	0	0	1	0	0	0	1	0	0	0	0	0	0	0	0	0	0	0	0	0	0	1	Article
48707158	Implementing the Global Plan to Stop TB, 2011-2015-Optimizing Allocations and the Global Fund's Contribution: A Scenario Projections Study	PLOS ONE	8	5	Gold OA article (APC)	Gold OA	8	Williams-B	Williams	Brian	Author	5	SACEMA	SACEMA	SACEMA	Research institute	Research Institute	Research Institute	Research Institute	1	1495	0	1	0	0	0	0	0	0	0	0	1	0	0	0	0	0	0	0	0	0	1	0	1	Article
49930703	Implementing the World Report on Disability in Malaysia: A student-led service to promote knowledge and innovation	INTERNATIONAL JOURNAL OF SPEECH-LANGUAGE PATHOLOGY	4	2	Green OA article	Green OA	3	Wilson-L	Wilson	Linda	Author	2	CHARLES-STURT-UNIV	CHARLES-STURT-UNIV	CHARLES-STURT-UNIV	University	University: Unranked	University: Unranked	University: Unranked	1	0	0	0	0	1	0	0	0	0	0	0	0	0	0	0	0	0	0	0	1	1	0	0	1	Article
44905783	Implications of Food Insecurity on Global Health Policy and Nursing Practice	JOURNAL OF NURSING SCHOLARSHIP	2	1	Toll access article	Toll access	2	Schlenk-EA	Schlenk	Elizabeth A.	Author	1	UNIV-PITTSBURGH	UNIV-PITTSBURGH	UNIV-PITTSBURGH	University	University - Rank 051-100	University - Rank 51-100	University - Rank 051-100	1	0	0	0	0	0	0	1	0	0	0	0	0	0	0	0	1	0	0	0	0	1	0	0	1	Article
49930707	Implications of the World Report on Disability for responding to communication disorders in Brazil	INTERNATIONAL JOURNAL OF SPEECH-LANGUAGE PATHOLOGY	2	2	Green OA article	Green OA	2	Behlau-M	Behlau	Mara	Author	2	UNIV-FED-SAO-PAULO	UNIV-FED-SAO-PAULO	UNIV-FED-SAO-PAULO	University	University - Rank 501+	University - Rank 501+	University - Rank 501+	1	0	0	0	0	1	0	0	0	0	0	0	0	0	0	0	0	0	0	1	0	1	0	0	1	Article
53133916	Importance of government policies and other influences in transforming global diets	NUTRITION REVIEWS	4	5	Toll access article	Toll access	4	Hallam-D	Hallam	David	Author	5	FOOD-&-AGR-ORG-FAO	FOOD-&-AGR-ORG-UNITED-NATIONS	FOOD-&-AGR-ORG-UNITED-NATIONS	Non-profit	Non-profit	Non-profit	Non-profit	1	0	0	0	0	0	0	1	0	0	0	1	0	0	0	0	0	0	0	0	0	0	0	0	1	Review
47515131	Importance of sexually transmitted infections in funding for HIV within proposals to the Global Fund	SEXUALLY TRANSMITTED INFECTIONS	3	1	Green OA article	Green OA	3	Pires-SS	Pires	Susana Salgado	Author	1	WHO	WHO	WHO	Non-profit	Non-profit	Non-profit	Non-profit	1	0	0	0	0	1	0	0	0	0	0	1	0	0	0	0	0	0	0	0	0	0	0	0	1	Article
53662000	Improved maternal health since the ICPD: 20 years of progress	CONTRACEPTION	6	1	Green OA article	Green OA	6	Langer-A	Langer	Ana	Author	1	HARVARD-UNIV	HARVARD-UNIV	HARVARD-UNIV	University	University - Rank 001-025	University - Rank 001-025	University - Rank 001-025	1	0	0	0	0	1	0	0	0	0	0	0	0	0	1	0	0	0	0	0	0	1	0	1	0	Review
50660759	Improvement of research quality in the fields of orthopaedics and trauma-a global perspective	INTERNATIONAL ORTHOPAEDICS	17	13	Green OA article	Green OA	17	Jupiter-JB	Jupiter	Jesse B.	Author	1	HARVARD-UNIV	HARVARD-UNIV	HARVARD-UNIV	University	University - Rank 001-025	University - Rank 001-025	University - Rank 001-025	1	0	0	0	0	1	0	0	0	0	0	0	0	0	1	0	0	0	0	0	0	1	0	1	0	Review
52189784	Improving Global Health Education: Development of a Global Health Competency Model	AMERICAN JOURNAL OF TROPICAL MEDICINE AND HYGIENE	15	16	Green OA article	Green OA	15	Spencer-HC	Spencer	Harrison C.	Author	2	ASSOC-SCH-&-PROGRAMS-PUBL-HLTH	ASSOC-SCH-&-PROGRAMS-PUBL-HLTH	ASSOC-SCH-&-PROGRAMS-PUBL-HLTH	Scientific association	Scientific association	Scientific association	Scientific association	1	0	0	0	0	1	0	0	0	0	0	0	0	1	0	0	0	0	0	0	0	0	0	0	1	Article
47031616	Improving Global Virologic Surveillance for Measles and Rubella	JOURNAL OF INFECTIOUS DISEASES	11	5	Hybrid article	Hybrid	11	Featherstone-D	Featherstone	David	Author	5	WHO	WHO	WHO	Non-profit	Non-profit	Non-profit	Non-profit	1	3500	0	0	0	0	1	0	0	0	0	1	0	0	0	0	0	0	0	0	0	0	1	0	1	Article
50315711	Improving access to care for children with mental disorders: a global perspective	ARCHIVES OF DISEASE IN CHILDHOOD	4	5	Green OA article	Green OA	4	Divan-G	Divan	Gauri	Author	5	SANGATH	SANGATH-CTR	SANGATH-CTR	Research institute	Research Institute	Research Institute	Research Institute	1	0	0	0	0	1	0	0	0	0	0	0	1	0	0	0	0	0	0	0	0	0	0	0	1	Article
44201999	Improving and Assuring Newborn Screening Laboratory Quality Worldwide: 30-Year Experience at the Centers for Disease Control and Prevention	SEMINARS IN PERINATOLOGY	4	1	Toll access article	Toll access	4	Hannon-WH	Hannon	W. Harry	Author	1	CTR-DIS-CONTROL-&-PREVENT	CDC	CDC	Government	Government	Government	Government	1	0	0	0	0	0	0	1	0	1	0	0	0	0	0	0	0	0	0	0	0	0	0	0	1	Review
51647723	Improving global health governance to combat counterfeit medicines: a proposal for a UNODC-WHO-Interpol trilateral mechanism	BMC MEDICINE	2	3	Gold OA article (APC)	Gold OA	2	Liang-BA	Liang	Bryan A.	Author	1	UNIV-CALIF-SAN-DIEGO	UNIV-CALIF-SAN-DIEGO	UNIV-CALIF-SAN-DIEGO	University	University - Rank 026-050	University - Rank 026-050	University - Rank 026-050	1	2785	0	1	0	0	0	0	0	0	0	0	0	0	0	1	0	0	0	0	0	1	1	1	0	Article
48899689	Improving musculoskeletal health: Global issues	BEST PRACTICE & RESEARCH IN CLINICAL RHEUMATOLOGY	2	2	Toll access article	Toll access	2	Brooks-PM	Brooks	Peter M.	Author	2	UNIV-MELBOURNE	UNIV-MELBOURNE	UNIV-MELBOURNE	University	University - Rank 026-050	University - Rank 026-050	University - Rank 026-050	1	0	0	0	0	0	0	1	0	0	0	0	0	0	0	1	0	0	0	0	0	1	0	1	0	Article
46741485	Improving the Delivery of Global Tobacco Control	MOUNT SINAI JOURNAL OF MEDICINE	3	2	Toll access article	Toll access	3	Colbert-J	Colbert	James	Author	2	BRIGHAM-&-WOMENS-HOSP	BRIGHAM-&-WOMENS-HOSP	BRIGHAM-&-WOMENS-HOSP	Hospital	University - Rank 001-025	University-Hospital	Hospital	1	0	0	0	0	0	0	1	0	0	1	0	0	0	0	0	0	0	0	0	0	0	0	0	1	Article
53228344	In the shadowlands of global health: Observations from health workers in Kenya	GLOBAL PUBLIC HEALTH	2	4	Green OA article	Green OA	2	Otieno-P	Otieno	Phelgona	Author	4	KENYA-GOVT-MED-RES-CTR	KENYA-GOVT-MED-RES-CTR	KENYA-GOVT-MED-RES-CTR	Research institute	Research Institute	Research Institute	Research Institute	1	0	0	0	0	1	0	0	0	0	0	0	1	0	0	0	0	0	0	0	0	0	0	0	1	Article
52206509	Incentives for Reporting Disease Outbreaks	PLOS ONE	3	7	Gold OA article (APC)	Gold OA	3	Malani-A	Malani	Anup	Author	1	CTR-DIS-DYNAM-ECON-&-POLICY	CTR-DIS-DYNAM-ECON-&-POLICY	CTR-DIS-DYNAM-ECON-&-POLICY	Research institute	Research Institute	Research Institute	Research Institute	1	1495	0	1	0	0	0	0	0	0	0	0	1	0	0	0	0	0	0	0	0	0	1	0	1	Article
50331502	Incidence of abnormalities in temporomandibular joints in a population of 1,100 urban and rural patients lacking teeth and other parafunctions in 2003-2008. An international problem	ANNALS OF AGRICULTURAL AND ENVIRONMENTAL MEDICINE	7	4	Gold OA article (APC)	Gold OA	7	Borowicz-J	Borowicz	Janusz	Author	2	MED-UNIV-LUBLIN	MED-UNIV-LUBLIN	MED-UNIV-LUBLIN	University	University: Unranked	University: Unranked	University: Unranked	1	705	0	1	0	0	0	0	0	0	0	0	0	0	0	0	0	0	0	0	1	1	1	0	1	Article
52511435	Incidence of multidrug-resistant tuberculosis disease in children: systematic review and global estimates	LANCET	9	6	Green OA article	Green OA	9	Cohen-T	Cohen	Ted	Author	1	BRIGHAM-&-WOMENS-HOSP	BRIGHAM-&-WOMENS-HOSP	BRIGHAM-&-WOMENS-HOSP	Hospital	University - Rank 001-025	University-Hospital	Hospital	1	0	0	0	0	1	0	0	0	0	1	0	0	0	0	0	0	0	0	0	0	0	0	0	1	Review
49991651	Inclusive Domestic Violence Standards: Strategies to Improve Interventions for Women With Disabilities?	VIOLENCE AND VICTIMS	3	2	Green OA article	Green OA	3	Howe-K	Howe	Keran	Author	2	WOMEN-DISABIL-VICTORIA	WOMEN-DISABIL-VICTORIA	WOMEN-DISABIL-VICTORIA	Non-profit	Non-profit	Non-profit	Non-profit	1	0	0	0	0	1	0	0	0	0	0	1	0	0	0	0	0	0	0	0	0	0	0	0	1	Article
45038322	Increased educational attainment and its effect on child mortality in 175 countries between 1970 and 2009: a systematic analysis	LANCET	4	1	Toll access article	Toll access	4	Murray-CJL	Murray	Christopher J. L.	Author	1	UNIV-WASHINGTON	UNIV-WASHINGTON	UNIV-WASHINGTON	University	University - Rank 026-050	University - Rank 026-050	University - Rank 026-050	1	0	0	0	0	0	0	1	0	0	0	0	0	0	0	1	0	0	0	0	0	1	0	1	0	Article
50690128	Increased frequency of visits improves the efficiency of surgical global health initiatives	JOURNAL OF OTOLARYNGOLOGY-HEAD & NECK SURGERY	6	4	Gold OA article (APC)	Gold OA	6	Vaccani-JP	Vaccani	Jean-Philippe	Author, Reprint Author	4	UNIV-OTTAWA	UNIV-OTTAWA	UNIV-OTTAWA	University	University - Rank 201-500	University - Rank 201-500	University - Rank 201-500	1	2145	0	1	0	0	0	0	0	0	0	0	0	0	0	0	0	0	1	0	0	1	1	0	1	Article
44625835	Increasing world incidence of thyroid cancer: Increased detection or higher radiation exposure?	HORMONES-INTERNATIONAL JOURNAL OF ENDOCRINOLOGY AND METABOLISM	1	3	Gold OA article (non-APC)	Gold OA	1	Wartofsky-L	Wartofsky	Leonard	Author, Reprint Author	1	WASHINGTON-HOSP-CTR	GEORGE-WASHINGTON-UNIV	WASHINGTON-HOSP-CTR	Hospital	University - Rank 201-500	University-Hospital	Hospital	1	0	0	0	1	0	0	0	0	0	1	0	0	0	0	0	0	0	0	0	0	0	0	0	1	Review
52489155	Indigenous health and environmental risk factors: an Australian problem with global analogues?	GLOBAL HEALTH ACTION	2	2	Gold OA article (APC)	Gold OA	2	Sly-PD	Sly	Peter D.	Author	2	UNIV-QUEENSLAND	UNIV-QUEENSLAND	UNIV-QUEENSLAND	University	University - Rank 051-100	University - Rank 51-100	University - Rank 051-100	1	1500	0	1	0	0	0	0	0	0	0	0	0	0	0	0	1	0	0	0	0	1	1	0	1	Article
51988925	Indoor Air Pollution in Developing Countries: Research and Implementation Needs for Improvements in Global Public Health	AMERICAN JOURNAL OF PUBLIC HEALTH	4	2	Green OA article	Green OA	4	Stephens-B	Stephens	Brent	Author, Reprint Author	2	IIT	IIT	IIT	University	University: Unranked	University: Unranked	University: Unranked	1	0	0	0	0	1	0	0	0	0	0	0	0	0	0	0	0	0	0	0	1	1	0	0	1	Article
48283711	Inequities in the use of cesarean section deliveries in the world	AMERICAN JOURNAL OF OBSTETRICS AND GYNECOLOGY	6	3	Toll access article	Toll access	6	Althabe-F	Althabe	Fernando	Author	1	INST-CLIN-EFFECTIVENESS-&-HLTH-POLICY-IECS	INST-CLIN-EFFECTIVENESS	INST-CLIN-EFFECTIVENESS	Research institute	Research Institute	Research Institute	Research Institute	1	0	0	0	0	0	0	1	0	0	0	0	1	0	0	0	0	0	0	0	0	0	0	0	1	Article
50365918	Inequity in India: the case of maternal and reproductive health	GLOBAL HEALTH ACTION	5	2	Gold OA article (APC)	Gold OA	5	Thomsen-S	Thomsen	Sarah	Author	1	KAROLINSKA-INST	KAROLINSKA-INST	KAROLINSKA-INST	University	University - Rank 026-050	University - Rank 026-050	University - Rank 026-050	1	1500	0	1	0	0	0	0	0	0	0	0	0	0	0	1	0	0	0	0	0	1	1	1	0	Article
50883130	Infections of the Developing World	CRITICAL CARE CLINICS	3	3	Toll access article	Toll access	3	Kissoon-N	Kissoon	Niranjan	Author	3	UNIV-BRITISH-COLUMBIA	UNIV-BRITISH-COLUMBIA	UNIV-BRITISH-COLUMBIA	University	University - Rank 026-050	University - Rank 026-050	University - Rank 026-050	1	0	0	0	0	0	0	1	0	0	0	0	0	0	0	1	0	0	0	0	0	1	0	1	0	Article
47081520	Influence of Global Region on Outcomes in Heart Failure Beta-Blocker Trials	JOURNAL OF THE AMERICAN COLLEGE OF CARDIOLOGY	9	7	Hybrid article	Hybrid	9	Bristow-MR	Bristow	Michael R.	Author	6	ARCA-BIOPHARMA	ARCA-BIOPHARMA	ARCA-BIOPHARMA	Company	Company	Company	Company	1	3000	0	0	0	0	1	0	1	0	0	0	0	0	0	0	0	0	0	0	0	0	1	0	1	Article
52380148	Influenza Forecasting in Human Populations: A Scoping Review	PLOS ONE	5	4	Gold OA article (APC)	Gold OA	5	McKenzie-FE	McKenzie	F. Ellis	Author	4	NIH	NIH	NIH	Government	Government	Government	Government	1	1495	0	1	0	0	0	0	0	1	0	0	0	0	0	0	0	0	0	0	0	0	1	0	1	Review
48465559	Initial Lesion Volume Is an Independent Predictor of Clinical Stroke Outcome at Day 90 An Analysis of the Virtual International Stroke Trials Archive (VISTA) Database	STROKE	4	2	Hybrid article	Hybrid	4	Schneider-A	Schneider	Armin	Author, Reprint Author	1	SYGNIS-BIOSCI	SYGNIS-BIOSCI	SYGNIS-BIOSCI	Company	Company	Company	Company	1	4500	0	0	0	0	1	0	1	0	0	0	0	0	0	0	0	0	0	0	0	0	1	0	1	Article
49819106	Initial assessment of strategic plans for improving the performance of Veterinary Services in developing countries: a review of OIE PVS Gap Analysis reports	REVUE SCIENTIFIQUE ET TECHNIQUE DE L OFFICE INTERNATIONAL DES EPIZOOTIES	4	3	Toll access article	Toll access	4	DAlessio-F	D'Alessio	F.	Author	3	WORLD-ORG-ANIM-HLTH-OIE	WORLD-ORG-ANIM-HLTH	WORLD-ORG-ANIM-HLTH	Non-profit	Non-profit	Non-profit	Non-profit	1	0	0	0	0	0	0	1	0	0	0	1	0	0	0	0	0	0	0	0	0	0	0	0	1	Review
46977624	Injury mortality indicators: recommendations from the International Collaborative Effort on Injury Statistics	INJURY PREVENTION	3	3	Green OA article	Green OA	3	SeguiGomez-M	Segui-Gomez	Maria	Author, Reprint Author	1	UNIV-NAVARRA	UNIV-NAVARRA	UNIV-NAVARRA	University	University: Unranked	University: Unranked	University: Unranked	1	0	0	0	0	1	0	0	0	0	0	0	0	0	0	0	0	0	0	0	1	1	0	0	1	Article
45050856	Innovative Solutions to Closing the Health Gap Between Rich and Poor: A Special Symposium on Global Health Governance	JOURNAL OF LAW MEDICINE & ETHICS	2	4	Toll access article	Toll access	2	Mok-EA	Mok	Emily A.	Author	4	GEORGETOWN-UNIV	GEORGETOWN-UNIV	GEORGETOWN-UNIV	University	University - Rank 101-200	University - Rank 101-200	University - Rank 101-200	1	0	0	0	0	0	0	1	0	0	0	0	0	0	0	0	0	1	0	0	0	1	0	0	1	Article
49587627	Innovative financing for health: what is truly innovative?	LANCET	4	6	Toll access article	Toll access	4	Frenk-J	Frenk	Julio	Author	6	HARVARD-UNIV	HARVARD-UNIV	HARVARD-UNIV	University	University - Rank 001-025	University - Rank 001-025	University - Rank 001-025	1	0	0	0	0	0	0	1	0	0	0	0	0	0	1	0	0	0	0	0	0	1	0	1	0	Article
52693965	Innovative strategies for closing the mental health treatment gap globally	CURRENT OPINION IN PSYCHIATRY	4	3	Toll access article	Toll access	4	Pike-KM	Pike	Kathleen M.	Author, Reprint Author	1	COLUMBIA-UNIV	COLUMBIA-UNIV	COLUMBIA-UNIV	University	University - Rank 001-025	University - Rank 001-025	University - Rank 001-025	1	0	0	0	0	0	0	1	0	0	0	0	0	0	1	0	0	0	0	0	0	1	0	1	0	Review
46512555	Integrating CanMEDS competencies into global health electives: an innovative elective program	CANADIAN JOURNAL OF EMERGENCY MEDICINE	3	4	Toll access article	Toll access	3	Scolnik-D	Scolnik	Dennis	Author	2	UNIV-TORONTO	UNIV-TORONTO	UNIV-TORONTO	University	University - Rank 001-025	University - Rank 001-025	University - Rank 001-025	1	0	0	0	0	0	0	1	0	0	0	0	0	0	1	0	0	0	0	0	0	1	0	1	0	Article
47230395	Integrating Cancer Control into Global Health	SCIENCE TRANSLATIONAL MEDICINE	2	1	Delayed OA article	Delayed OA	2	Trimble-EL	Trimble	Edward L.	Author	1	NCI	NCI	NCI	Government	Government	Government	Government	1	0	1	0	0	0	0	0	0	1	0	0	0	0	0	0	0	0	0	0	0	0	0	0	1	Article
46396403	International Association of Gerontology and Geriatrics: A Global Agenda for Clinical Research and Quality of Care in Nursing Homes	JOURNAL OF THE AMERICAN MEDICAL DIRECTORS ASSOCIATION	18	19	Toll access article	Toll access	18	Morley-JE	Morley	John E.	Author, Reprint Author	1	ST-LOUIS-UNIV	ST-LOUIS-UNIV	ST-LOUIS-UNIV	University	University - Rank 201-500	University - Rank 201-500	University - Rank 201-500	1	0	0	0	0	0	0	1	0	0	0	0	0	0	0	0	0	0	1	0	0	1	0	0	1	Article
46681911	International Committee for Monitoring Assisted Reproductive Technology (ICMART) world report: assisted reproductive technology 2003	FERTILITY AND STERILITY	7	7	Toll access article	Toll access	7	deMouzon-J	de Mouzon	Jacques	Author	7	GRP-HOSP-COCHIN-ST-VINCET-DE-PAUL	GRP-HOSP-COCHIN-ST-VINCET-DE-PAUL	GRP-HOSP-COCHIN-ST-VINCET-DE-PAUL	Hospital	University - Rank 201-500	University-Hospital	Hospital	1	0	0	0	0	0	0	1	0	0	1	0	0	0	0	0	0	0	0	0	0	0	0	0	1	Article
51969017	International Committee for Monitoring Assisted Reproductive Technology: world report on assisted reproductive technology, 2005	FERTILITY AND STERILITY	7	9	Toll access article	Toll access	7	Sullivan-EA	Sullivan	Elizabeth A.	Author	9	UNIV-NEW-S-WALES	UNIV-NEW-S-WALES	UNIV-NEW-S-WALES	University	University - Rank 051-100	University - Rank 51-100	University - Rank 051-100	1	0	0	0	0	0	0	1	0	0	0	0	0	0	0	0	1	0	0	0	0	1	0	0	1	Article
45048843	International Crises and Global Health Electives: Lessons for Faculty and Institutions	ACADEMIC MEDICINE	5	3	Hybrid article	Hybrid	5	Morgan-DR	Morgan	Douglas R.	Author	3	UNIV-N-CAROLINA	UNIV-N-CAROLINA	UNIV-N-CAROLINA	University	University - Rank 051-100	University - Rank 51-100	University - Rank 051-100	1	3900	0	0	0	0	1	0	0	0	0	0	0	0	0	0	1	0	0	0	0	1	1	0	1	Article
48532178	International Electives at the University of Minnesota Global Pediatric Residency Program: Opportunities for Education in All Accreditation Council for Graduate Medical Education Competencies	ACADEMIC PEDIATRICS	6	2	Green OA article	Green OA	6	John-C	John	Chandy	Author	2	UNIV-MINNESOTA	UNIV-MINNESOTA	UNIV-MINNESOTA	University	University - Rank 051-100	University - Rank 51-100	University - Rank 051-100	1	0	0	0	0	1	0	0	0	0	0	0	0	0	0	0	1	0	0	0	0	1	0	0	1	Article
47069883	International Emergency Medicine: A Review of the Literature From 2010	ACADEMIC EMERGENCY MEDICINE	7	7	Hybrid article	Hybrid	7	Levine-AC	Levine	Adam C.	Author	2	HARVARD-HUMANITARIAN-INITIAT	HARVARD-UNIV	HARVARD-MED-SCH	Hospital	University - Rank 001-025	University-Hospital	Hospital	1	3000	0	0	0	0	1	0	0	0	1	0	0	0	0	0	0	0	0	0	0	0	1	0	1	Review
50224469	International Incidence and Outcomes of Biliary Atresia	JOURNAL OF PEDIATRIC GASTROENTEROLOGY AND NUTRITION	5	2	Toll access article	Toll access	5	Benchimol-EI	Benchimol	Eric I.	Author	1	CHILDRENS-HOSP-EASTERN-ONTARIO	CHILDRENS-HOSP-EASTERN-ONTARIO	CHILDRENS-HOSP-EASTERN-ONTARIO	Hospital	University - Rank 201-500	University-Hospital	Hospital	1	0	0	0	0	0	0	1	0	0	1	0	0	0	0	0	0	0	0	0	0	0	0	0	1	Review
53056472	International Patterns of Childhood Chronic Myeloid Leukemia: Comparisons Between the United States and Resource-Restricted Nations	PEDIATRIC BLOOD & CANCER	6	7	Toll access article	Toll access	6	Levine-PH	Levine	Paul H.	Author, Reprint Author	3	GEORGE-WASHINGTON-UNIV	GEORGE-WASHINGTON-UNIV	GEORGE-WASHINGTON-UNIV	University	University - Rank 201-500	University - Rank 201-500	University - Rank 201-500	1	0	0	0	0	0	0	1	0	0	0	0	0	0	0	0	0	0	1	0	0	1	0	0	1	Article
44689566	International Perspective on Early-Onset Neonatal Sepsis	CLINICS IN PERINATOLOGY	3	2	Toll access article	Toll access	3	Zaidi-AKM	Zaidi	Anita K. M.	Author, Reprint Author	1	AGA-KHAN-UNIV	AGA-KHAN-UNIV	AGA-KHAN-UNIV	University	University: Unranked	University: Unranked	University: Unranked	1	0	0	0	0	0	0	1	0	0	0	0	0	0	0	0	0	0	0	0	1	1	0	0	1	Article
47907449	International School Mental Health: Global Approaches, Global Challenges, and Global Opportunities	CHILD AND ADOLESCENT PSYCHIATRIC CLINICS OF NORTH AMERICA	2	1	Toll access article	Toll access	2	Kutcher-S	Kutcher	Stan	Author	1	IWK-GRACE-HLTH-CTR-CHILDREN-WOMEN-&-FAMILIES	IWK-GRACE-HLTH-CTR-CHILDREN-WOMEN-&-FAMILIES	IWK-GRACE-HLTH-CTR-CHILDREN-WOMEN-&-FAMILIES	Hospital	Hospital	Hospital	Hospital	1	0	0	0	0	0	0	1	0	0	1	0	0	0	0	0	0	0	0	0	0	0	0	0	1	Article
52961779	International Variations in Bladder Cancer Incidence and Mortality	EUROPEAN UROLOGY	5	3	Toll access article	Toll access	5	Jemal-A	Jemal	Ahmedin	Author, Reprint Author	1	AMER-CANC-SOC	AMER-CANC-SOC	AMER-CANC-SOC	Scientific association	Scientific association	Scientific association	Scientific association	1	0	0	0	0	0	0	1	0	0	0	0	0	1	0	0	0	0	0	0	0	0	0	0	1	Review
48724841	International cohort studies	BUNDESGESUNDHEITSBLATT-GESUNDHEITSFORSCHUNG-GESUNDHEITSSCHUTZ	2	1	Toll access article	Toll access	2	Pigeot-I	Pigeot	I.	Author	1	UNIV-BREMEN	UNIV-BREMEN	UNIV-BREMEN	University	University - Rank 201-500	University - Rank 201-500	University - Rank 201-500	1	0	0	0	0	0	0	1	0	0	0	0	0	0	0	0	0	0	1	0	0	1	0	0	1	Article
49452194	International environmental and occupational health: From individual scientists to networked science Hubs	AMERICAN JOURNAL OF INDUSTRIAL MEDICINE	6	3	Green OA article	Green OA	6	Bridbord-K	Bridbord	Kenneth	Author	1	NIH	NIH	NIH	Government	Government	Government	Government	1	0	0	0	0	1	0	0	0	1	0	0	0	0	0	0	0	0	0	0	0	0	0	0	1	Article
47798729	International financing for cooperation to develop health in Latin America and the Caribbean	REVISTA PANAMERICANA DE SALUD PUBLICA-PAN AMERICAN JOURNAL OF PUBLIC HEALTH	3	1	Gold OA article (non-APC)	Gold OA	3	VigilOliver-W	Vigil-Oliver	William	Author	1	ORG-PANAMER-SALUD	ORG-PANAMER-SALUD	ORG-PANAMER-SALUD	Non-profit	Non-profit	Non-profit	Non-profit	1	0	0	0	1	0	0	0	0	0	0	1	0	0	0	0	0	0	0	0	0	0	0	0	1	Article
50338246	International medical electives undertaken by Australian medical students: current trends and future directions	MEDICAL JOURNAL OF AUSTRALIA	3	2	Green OA article	Green OA	3	Langham-FJ	Langham	Freya J.	Author	2	AUSTRALIAN-MED-STUDENTS-ASSOC	AUSTRALIAN-MED-STUDENTS-ASSOC	AUSTRALIAN-MED-STUDENTS-ASSOC	Scientific association	Scientific association	Scientific association	Scientific association	1	0	0	0	0	1	0	0	0	0	0	0	0	1	0	0	0	0	0	0	0	0	0	0	1	Article
52603297	International pediatric radiology education: who should be trained, and how?	PEDIATRIC RADIOLOGY	2	2	Toll access article	Toll access	2	Shah-N	Shah	Nandish	Author	2	UNIV-N-CAROLINA	UNIV-N-CAROLINA	UNIV-N-CAROLINA	University	University - Rank 051-100	University - Rank 51-100	University - Rank 051-100	1	0	0	0	0	0	0	1	0	0	0	0	0	0	0	0	1	0	0	0	0	1	0	0	1	Article
53746380	International regulatory landscape and integration of corrective genome editing into in vitro fertilization	REPRODUCTIVE BIOLOGY AND ENDOCRINOLOGY	2	1	Gold OA article (APC)	Gold OA	2	Ishii-T	Ishii	Tetsuya	Author, Reprint Author	1	HOKKAIDO-UNIV	HOKKAIDO-UNIV	HOKKAIDO-UNIV	University	University - Rank 201-500	University - Rank 201-500	University - Rank 201-500	1	2145	0	1	0	0	0	0	0	0	0	0	0	0	0	0	0	0	1	0	0	1	1	0	1	Review
49080525	International shortfall inequality in life expectancy in women and in men, 1950-2010	BULLETIN OF THE WORLD HEALTH ORGANIZATION	6	5	Gold OA article (non-APC)	Gold OA	6	AbouZahr-C	Abou-Zahr	Carla	Author	5	HLTH-STAT-&-INFORMAT	HLTH-STAT-&-INFORMAT	HLTH-STAT-&-INFORMAT	Non-profit	Non-profit	Non-profit	Non-profit	1	0	0	0	1	0	0	0	0	0	0	1	0	0	0	0	0	0	0	0	0	0	0	0	1	Article
46079826	International trade versus public health during the FCTC negotiations, 1999-2003	TOBACCO CONTROL	3	3	Green OA article	Green OA	3	Glantz-SA	Glantz	Stanton A.	Author	2	UNIV-CALIF-SAN-FRANCISCO	UCSF	UCSF	University	University - Rank 001-025	University - Rank 001-025	University - Rank 001-025	1	0	0	0	0	1	0	0	0	0	0	0	0	0	1	0	0	0	0	0	0	1	0	1	0	Article
49688514	International trends in the incidence of malignant melanoma 1953-2008uare recent generations at higher or lower risk?	INTERNATIONAL JOURNAL OF CANCER	7	6	Hybrid article	Hybrid	7	Bray-F	Bray	Freddie	Author	4	INT-AGCY-RES-CANC	INT-AGCY-RES-CANC	INT-AGCY-RES-CANC	Research institute	Research Institute	Research Institute	Research Institute	1	3000	0	0	0	0	1	0	0	0	0	0	1	0	0	0	0	0	0	0	0	0	1	0	1	Article
53019130	Interprofessional Global Health Education in a Cosmopolitan Community of North America: The iCHEE Experience	ACADEMIC MEDICINE	3	3	Green OA article	Green OA	3	Spencer-PS	Spencer	Peter S.	Author, Reprint Author	1	OREGON-HLTH-&-SCI-UNIV	OREGON-HLTH-&-SCI-UNIV	OREGON-HLTH-&-SCI-UNIV	University	University - Rank 201-500	University - Rank 201-500	University - Rank 201-500	1	0	0	0	0	1	0	0	0	0	0	0	0	0	0	0	0	0	1	0	0	1	0	0	1	Article
48543012	Intersectionality and gender mainstreaming in international health: Using a feminist participatory action research process to analyse voices and debates from the global south and north	SOCIAL SCIENCE & MEDICINE	14	13	Hybrid article	Hybrid	14	Theobald-S	Theobald	Sally	Author, Reprint Author	1	UNIV-LIVERPOOL	UNIV-LIVERPOOL	UNIV-LIVERPOOL	University	University - Rank 101-200	University - Rank 101-200	University - Rank 101-200	1	3200	0	0	0	0	1	0	0	0	0	0	0	0	0	0	0	1	0	0	0	1	1	0	1	Article
53137626	Into the deep end: Incorporating a global health governance and diplomacy experience in graduate public health training	GLOBAL PUBLIC HEALTH	2	1	Green OA article	Green OA	2	Kotlewski-JA	Kotlewski	Jennifer A.	Author	1	UNIV-SO-CALIF	UNIV-SO-CALIF	UNIV-SO-CALIF	University	University - Rank 051-100	University - Rank 51-100	University - Rank 051-100	1	0	0	0	0	1	0	0	0	0	0	0	0	0	0	0	1	0	0	0	0	1	0	0	1	Article
52035063	Intrapartum-related neonatal encephalopathy incidence and impairment at regional and global levels for 2010 with trends from 1990	PEDIATRIC RESEARCH	11	12	Green OA article	Green OA	11	Lawn-JE	Lawn	Joy E.	Author	11	LONDON-SCH-HYG-&-TROP-MED	UCL	UCL	University	University - Rank 001-025	University - Rank 001-025	University - Rank 001-025	1	0	0	0	0	1	0	0	0	0	0	0	0	0	1	0	0	0	0	0	0	1	0	1	0	Article
49930700	Involving people with communication disability in research in Uganda: A response to the World Report on Disability	INTERNATIONAL JOURNAL OF SPEECH-LANGUAGE PATHOLOGY	4	1	Green OA article	Green OA	1	Jones-I	Jones	Isla	Author, Reprint Author	1	MANCHESTER-METROPOLITAN-UNIV	MANCHESTER-METROPOLITAN-UNIV	MANCHESTER-METROPOLITAN-UNIV	University	University - Rank 501+	University - Rank 501+	University - Rank 501+	1	0	0	0	0	1	0	0	0	0	0	0	0	0	0	0	0	0	0	1	0	1	0	0	1	Article
51085699	Iodine Insufficiency: A Global Health Problem?	ADVANCES IN NUTRITION	2	2	Green OA article	Green OA	2	Pearce-EN	Pearce	Elizabeth N.	Author	2	BOSTON-UNIV	BOSTON-UNIV	BOSTON-UNIV	University	University - Rank 051-100	University - Rank 51-100	University - Rank 051-100	1	0	0	0	0	1	0	0	0	0	0	0	0	0	0	0	1	0	0	0	0	1	0	0	1	Article
44721766	Iodine status and availability of iodized salt: An across-country analysis	FOOD AND NUTRITION BULLETIN	2	2	Green OA article	Green OA	2	Miloff-A	Miloff	Alexander	Author	2	HARVESTPLUS	HARVESTPLUS	HARVESTPLUS	Non-profit	Non-profit	Non-profit	Non-profit	1	0	0	0	0	1	0	0	0	0	0	1	0	0	0	0	0	0	0	0	0	0	0	0	1	Article
51800915	Is Health Aid Reaching the Poor? Analysis of Household Data from Aid Recipient Countries	PLOS ONE	1	3	Gold OA article (APC)	Gold OA	1	Bendavid-E	Bendavid	Eran	Author, Reprint Author	1	STANFORD-UNIV	STANFORD-UNIV	STANFORD-UNIV	University	University - Rank 001-025	University - Rank 001-025	University - Rank 001-025	1	1495	0	1	0	0	0	0	0	0	0	0	0	0	1	0	0	0	0	0	0	1	1	1	0	Article
44255700	Is early diagnosis of oral cancer a feasible objective? Who is to blame for diagnostic delay?	ORAL DISEASES	7	4	Toll access article	Toll access	7	Seoane-J	Seoane	J.	Author	3	UNIV-SANTIAGO-DE-COMPOSTELA	UNIV-SANTIAGO-DE-COMPOSTELA	UNIV-SANTIAGO-DE-COMPOSTELA	University	University - Rank 501+	University - Rank 501+	University - Rank 501+	1	0	0	0	0	0	0	1	0	0	0	0	0	0	0	0	0	0	0	1	0	1	0	0	1	Review
53207815	Is it time for a new global classification of multiple sclerosis?	JOURNAL OF THE NEUROLOGICAL SCIENCES	3	2	Toll access article	Toll access	3	Melcon-CM	Melcon	Carlos M.	Author	1	FDN-INVEST-NEUROEPIDEMIOL	FDN-INVEST-NEUROEPIDEMIOL	FDN-INVEST-NEUROEPIDEMIOL	Research institute	Research Institute	Research Institute	Research Institute	1	0	0	0	0	0	0	1	0	0	0	0	1	0	0	0	0	0	0	0	0	0	0	0	1	Article
49241063	Is the Asthma Epidemic Still Ascending?	CLINICS IN CHEST MEDICINE	2	2	Toll access article	Toll access	2	AnnesiMaesano-I	Annesi-Maesano	Isabella	Author, Reprint Author	1	INSERM	INSERM	INSERM	Government	Government	Government	Government	1	0	0	0	0	0	0	1	0	1	0	0	0	0	0	0	0	0	0	0	0	0	0	0	1	Article
45165565	Is the eradication of tuberculosis 'yesterday's ambition' or 'tomorrow's triumph'?	CLINICAL MEDICINE	2	1	Toll access article	Toll access	2	Grange-JM	Grange	John M.	Author, Reprint Author	1	UCL	UCL	UCL	University	University - Rank 001-025	University - Rank 001-025	University - Rank 001-025	1	0	0	0	0	0	0	1	0	0	0	0	0	0	1	0	0	0	0	0	0	1	0	1	0	Article
43933102	Is the prevalence of asthma declining? Systematic review of epidemiological studies	ALLERGY	4	2	Hybrid article	Hybrid	4	Sheikh-A	Sheikh	A.	Author, Reprint Author	1	UNIV-EDINBURGH	UNIV-EDINBURGH	UNIV-EDINBURGH	University	University - Rank 026-050	University - Rank 026-050	University - Rank 026-050	1	4000	0	0	0	0	1	0	0	0	0	0	0	0	0	1	0	0	0	0	0	1	1	1	0	Review
50284214	Is the reporting timeliness gap for avian flu and H1N1 outbreaks in global health surveillance systems associated with country transparency?	GLOBALIZATION AND HEALTH	6	6	Gold OA article (APC)	Gold OA	6	Rougemont-AC	Rougemont	Andre C.	Author	6	UNIV-GENEVA	UNIV-GENEVA	UNIV-GENEVA	University	University - Rank 101-200	University - Rank 101-200	University - Rank 101-200	1	2145	0	1	0	0	0	0	0	0	0	0	0	0	0	0	0	1	0	0	0	1	1	0	1	Article
52251458	Is universal health coverage the practical expression of the right to health care?	BMC INTERNATIONAL HEALTH AND HUMAN RIGHTS	8	8	Gold OA article (APC)	Gold OA	8	Forman-L	Forman	Lisa	Author	8	UNIV-TORONTO	UNIV-TORONTO	UNIV-TORONTO	University	University - Rank 001-025	University - Rank 001-025	University - Rank 001-025	1	2145	0	1	0	0	0	0	0	0	0	0	0	0	1	0	0	0	0	0	0	1	1	1	0	Article
53603319	Is vitamin D deficiency a major global public health problem?	JOURNAL OF STEROID BIOCHEMISTRY AND MOLECULAR BIOLOGY	2	1	Green OA article	Green OA	2	Gonzalez-L	Gonzalez	Lilliana	Author	1	UNIV-PUERTO-RICO	UNIV-PUERTO-RICO	UNIV-PUERTO-RICO	University	University: Unranked	University: Unranked	University: Unranked	1	0	0	0	0	1	0	0	0	0	0	0	0	0	0	0	0	0	0	0	1	1	0	0	1	Review
52475436	Italy's contribution to global health: the need for a paradigm shift	GLOBALIZATION AND HEALTH	4	3	Gold OA article (APC)	Gold OA	4	Gautier-L	Gautier	Lara	Author	1	UNIV-BOCCONI	UNIV-BOCCONI	UNIV-BOCCONI	University	University: Unranked	University: Unranked	University: Unranked	1	2145	0	1	0	0	0	0	0	0	0	0	0	0	0	0	0	0	0	0	1	1	1	0	1	Article
44024834	Key Concepts for Estimating the Burden of Surgical Conditions and the Unmet Need for Surgical Care	WORLD JOURNAL OF SURGERY	9	9	Green OA article	Green OA	9	Jamison-D	Jamison	Dean	Author	9	UNIV-WASHINGTON	UNIV-WASHINGTON	UNIV-WASHINGTON	University	University - Rank 026-050	University - Rank 026-050	University - Rank 026-050	1	0	0	0	0	1	0	0	0	0	0	0	0	0	0	1	0	0	0	0	0	1	0	1	0	Article
50881704	Key informant interview on antimicrobial resistance (AMR) in some countries in the western pacific region	GLOBALIZATION AND HEALTH	2	2	Gold OA article (APC)	Gold OA	2	Wakabayashi-M	Wakabayashi	Mami	Author	1	WHO	WHO	WHO	Non-profit	Non-profit	Non-profit	Non-profit	1	2145	0	1	0	0	0	0	0	0	0	1	0	0	0	0	0	0	0	0	0	0	1	0	1	Article
48980319	Knowledge networks for global public health	GLOBAL PUBLIC HEALTH	3	1	Toll access article	Toll access	3	Parker-R	Parker	Richard	Author	1	COLUMBIA-UNIV	COLUMBIA-UNIV	COLUMBIA-UNIV	University	University - Rank 001-025	University - Rank 001-025	University - Rank 001-025	1	0	0	0	0	0	0	1	0	0	0	0	0	0	1	0	0	0	0	0	0	1	0	1	0	Article
49930698	Knowledge transfer between minority and majority world settings and its application to the World Report on Disability	INTERNATIONAL JOURNAL OF SPEECH-LANGUAGE PATHOLOGY	1	1	Toll access article	Toll access	1	Cheng-LRL	Cheng	Li-Rong Lilly	Author, Reprint Author	1	SAN-DIEGO-STATE-UNIV	SAN-DIEGO-STATE-UNIV	SAN-DIEGO-STATE-UNIV	University	University - Rank 201-500	University - Rank 201-500	University - Rank 201-500	1	0	0	0	0	0	0	1	0	0	0	0	0	0	0	0	0	0	1	0	0	1	0	0	1	Article
53249180	LEGAL AND REGULATORY CAPACITY TO SUPPORT THE GLOBAL HEALTH SECURITY AGENDA	BIOSECURITY AND BIOTERRORISM-BIODEFENSE STRATEGY PRACTICE AND SCIENCE	2	2	Toll access article	Toll access	2	Katz-R	Katz	Rebecca	Author, Reprint Author	2	GEORGE-WASHINGTON-UNIV	GEORGE-WASHINGTON-UNIV	GEORGE-WASHINGTON-UNIV	University	University - Rank 201-500	University - Rank 201-500	University - Rank 201-500	1	0	0	0	0	0	0	1	0	0	0	0	0	0	0	0	0	0	1	0	0	1	0	0	1	Article
53249182	LEVERAGING THE LABORATORY RESPONSE NETWORK MODEL FOR THE GLOBAL HEALTH SECURITY AGENDA	BIOSECURITY AND BIOTERRORISM-BIODEFENSE STRATEGY PRACTICE AND SCIENCE	2	1	Green OA article	Green OA	2	MaryogoRobinson-L	Maryogo-Robinson	Lucy	Author	1	ASSOC-PUBL-HLTH-LABS	ASSOC-PUBL-HLTH-LABS	ASSOC-PUBL-HLTH-LABS	Scientific association	Scientific association	Scientific association	Scientific association	1	0	0	0	0	1	0	0	0	0	0	0	0	1	0	0	0	0	0	0	0	0	0	0	1	Article
53823770	Labor force participation and secondary education of gender inequality index (GII) associated with healthy life expectancy (HLE) at birth	INTERNATIONAL JOURNAL FOR EQUITY IN HEALTH	2	2	Gold OA article (APC)	Gold OA	2	Kim-G	Kim	Gukbin	Author	2	UNIV-LONDON	UNIV-LONDON	UNIV-LONDON	University	University - Rank 001-025	University - Rank 001-025	University - Rank 001-025	1	2220	0	1	0	0	0	0	0	0	0	0	0	0	1	0	0	0	0	0	0	1	1	1	0	Article
50957118	Laboratory Support of Global Health Research	JOURNAL OF GENERAL INTERNAL MEDICINE	1	2	Green OA article	Green OA	1	VanderPol-B	Van der Pol	Barbara	Author, Reprint Author	1	INDIANA-UNIV	INDIANA-UNIV	INDIANA-UNIV	University	University - Rank 101-200	University - Rank 101-200	University - Rank 101-200	1	0	0	0	0	1	0	0	0	0	0	0	0	0	0	0	0	1	0	0	0	1	0	0	1	Article
44875355	Laboratory Systems and Services Are Critical in Global Health Time to End the Neglect?	AMERICAN JOURNAL OF CLINICAL PATHOLOGY	9	7	Green OA article	Green OA	8	DeCock-KM	De Cock	Kevin M.	Author	7	WORLD-HLTH-ORG	WHO	WHO	Non-profit	Non-profit	Non-profit	Non-profit	1	0	0	0	0	1	0	0	0	0	0	1	0	0	0	0	0	0	0	0	0	0	0	0	1	Article
48402176	Large-Scale Quality Improvement for Radiation Protection of Children Worldwide: Lessons From the Past Applied to the Present	AMERICAN JOURNAL OF ROENTGENOLOGY	4	4	Green OA article	Green OA	4	Perez-MD	Perez	Maria del Rosario	Author	4	WHO	WHO	WHO	Non-profit	Non-profit	Non-profit	Non-profit	1	0	0	0	0	1	0	0	0	0	0	1	0	0	0	0	0	0	0	0	0	0	0	0	1	Article
51637912	Late Life Depression A Global Problem with Few Resources	PSYCHIATRIC CLINICS OF NORTH AMERICA	2	2	Green OA article	Green OA	2	Kintziger-KW	Kintziger	Kristina W.	Author	2	GEORGIA-REGENTS-UNIV	GEORGIA-REGENTS-UNIV	GEORGIA-REGENTS-UNIV	University	University: Unranked	University: Unranked	University: Unranked	1	0	0	0	0	1	0	0	0	0	0	0	0	0	0	0	0	0	0	0	1	1	0	0	1	Article
48442057	Later Onset Phenotypes of Krabbe Disease: Results of the World-Wide Registry	PEDIATRIC NEUROLOGY	9	6	Toll access article	Toll access	9	Carter-R	Carter	Randy	Author	2	SUNY-BUFFALO	SUNY-BUFFALO	SUNY-BUFFALO	University	University - Rank 201-500	University - Rank 201-500	University - Rank 201-500	1	0	0	0	0	0	0	1	0	0	0	0	0	0	0	0	0	0	1	0	0	1	0	0	1	Article
48825035	Lay perspectives on hypertension and drug adherence: systematic review of qualitative research	BRITISH MEDICAL JOURNAL	3	2	Green OA article	Green OA	3	McKevitt-C	McKevitt	Christopher	Author	1	KINGS-COLL-LONDON	KINGS-COLL-LONDON	KINGS-COLL-LONDON	University	University - Rank 026-050	University - Rank 026-050	University - Rank 026-050	1	0	0	0	0	1	0	0	0	0	0	0	0	0	0	1	0	0	0	0	0	1	0	1	0	Review
53424032	Learning from developing countries in strengthening health systems: an evaluation of personal and professional impact among global health volunteers at Addis Ababa University's Tikur Anbessa Specialized Hospital (Ethiopia)	GLOBALIZATION AND HEALTH	3	2	Gold OA article (APC)	Gold OA	3	Tefera-G	Tefera	Girma	Author	1	UNIV-WISCONSIN	UNIV-WISCONSIN	UNIV-WISCONSIN	University	University - Rank 026-050	University - Rank 026-050	University - Rank 026-050	1	2145	0	1	0	0	0	0	0	0	0	0	0	0	0	1	0	0	0	0	0	1	1	1	0	Article
49637515	Leprosy frequency in the world, 1999-2010	MEMORIAS DO INSTITUTO OSWALDO CRUZ	2	2	Gold OA article (non-APC)	Gold OA	2	Penna-GO	Penna	Gerson Oliveira	Author	2	UNIV-BRASILIA	UNIV-BRASILIA	UNIV-BRASILIA	University	University: Unranked	University: Unranked	University: Unranked	1	0	0	0	1	0	0	0	0	0	0	0	0	0	0	0	0	0	0	0	1	1	0	0	1	Article
48017531	Lessons from SARS and H1N1/A: Employing a WHO-WTO forum to promote optimal economic-public health pandemic response	JOURNAL OF PUBLIC HEALTH POLICY	2	2	Toll access article	Toll access	1	Mackey-TK	Mackey	Tim K.	Author, Reprint Author	1	UNIV-CALIF-SAN-DIEGO	UNIV-CALIF-SAN-DIEGO	UNIV-CALIF-SAN-DIEGO	University	University - Rank 026-050	University - Rank 026-050	University - Rank 026-050	1	0	0	0	0	0	0	1	0	0	0	0	0	0	0	1	0	0	0	0	0	1	0	1	0	Article
45050864	Lessons from the Experience of U.N. Convention on the Rights of Persons with Disabilities: Addressing the Democratic Deficit in Global Health Governance	JOURNAL OF LAW MEDICINE & ETHICS	3	3	Toll access article	Toll access	2	Suozzi-D	Suozzi	David	Author	3	GEORGETOWN-UNIV	GEORGETOWN-UNIV	GEORGETOWN-UNIV	University	University - Rank 101-200	University - Rank 101-200	University - Rank 101-200	1	0	0	0	0	0	0	1	0	0	0	0	0	0	0	0	0	1	0	0	0	1	0	0	1	Article
51888823	Leveraging non-binding instruments for global health governance: reflections from the Global AIDS Reporting Mechanism for WHO reform	PUBLIC HEALTH	5	2	Toll access article	Toll access	5	Buse-K	Buse	K.	Author	2	UNAIDS	UNAIDS	UNAIDS	Non-profit	Non-profit	Non-profit	Non-profit	1	0	0	0	0	0	0	1	0	0	0	1	0	0	0	0	0	0	0	0	0	0	0	0	1	Review
51567792	Limitations of the Millennium Development Goals: a literature review	GLOBAL PUBLIC HEALTH	3	6	Green OA article	Green OA	3	Venkatapuram-S	Venkatapuram	Sridhar	Author	5	KINGS-COLL-LONDON	KINGS-COLL-LONDON	KINGS-COLL-LONDON	University	University - Rank 026-050	University - Rank 026-050	University - Rank 026-050	1	0	0	0	0	1	0	0	0	0	0	0	0	0	0	1	0	0	0	0	0	1	0	1	0	Article
48486238	Linking agriculture and health in low- and middle-income countries: an interdisciplinary research agenda	PROCEEDINGS OF THE NUTRITION SOCIETY	6	3	Green OA article	Green OA	6	Waage-J	Waage	Jeff	Author	3	SCH-ORIENTAL-&-AFRICAN-STUDIES	UNIV-LONDON	UNIV-LONDON	University	University - Rank 001-025	University - Rank 001-025	University - Rank 001-025	1	0	0	0	0	1	0	0	0	0	0	0	0	0	1	0	0	0	0	0	0	1	0	1	0	Article
52840341	Linking international clinical research with stateless populations to justice in global health	BMC MEDICAL ETHICS	6	7	Gold OA article (APC)	Gold OA	6	Loff-B	Loff	Bebe	Author	6	MONASH-UNIV	MONASH-UNIV	MONASH-UNIV	University	University - Rank 051-100	University - Rank 51-100	University - Rank 051-100	1	2145	0	1	0	0	0	0	0	0	0	0	0	0	0	0	1	0	0	0	0	1	1	0	1	Article
47849831	Local impact of health global problems. Introduction	GACETA MEDICA DE MEXICO	1	1	Gold OA article (non-APC)	Gold OA	1	delaFuente-JR	Ramon de la Fuente	Juan	Author, Reprint Author	1	UNIV-NACL-AUTONOMA-MEXICO	UNIV-NACL-AUTONOMA-MEXICO	UNIV-NACL-AUTONOMA-MEXICO	University	University - Rank 501+	University - Rank 501+	University - Rank 501+	1	0	0	0	1	0	0	0	0	0	0	0	0	0	0	0	0	0	0	1	0	1	0	0	1	Article
52734971	Locating global health in social medicine	GLOBAL PUBLIC HEALTH	3	6	Toll access article	Toll access	3	Stonington-SD	Stonington	Scott D.	Author	5	BRIGHAM-&-WOMENS-HOSP	BRIGHAM-&-WOMENS-HOSP	BRIGHAM-&-WOMENS-HOSP	Hospital	University - Rank 001-025	University-Hospital	Hospital	1	0	0	0	0	0	0	1	0	0	1	0	0	0	0	0	0	0	0	0	0	0	0	0	1	Article
50962179	Looking twice at the gender equity index for public health impact	BMC PUBLIC HEALTH	7	6	Gold OA article (APC)	Gold OA	7	AlvarezDardet-C	Alvarez-Dardet	Carlos	Author	1	UNIV-ALICANTE	UNIV-ALICANTE	UNIV-ALICANTE	University	University: Unranked	University: Unranked	University: Unranked	1	2145	0	1	0	0	0	0	0	0	0	0	0	0	0	0	0	0	0	0	1	1	1	0	1	Article
44391484	METHODS FOR THE STUDY OF EMPLOYMENT RELATIONS AND HEALTH INEQUALITIES IN A GLOBAL CONTEXT	INTERNATIONAL JOURNAL OF HEALTH SERVICES	9	14	Toll access article	Toll access	9	Muntaner-C	Muntaner	Carles	Author	9	CTR-ADDICT-&-MENTAL-HLTH	CTR-ADDICT-&-MENTAL-HLTH	CTR-ADDICT-&-MENTAL-HLTH	Research institute	Research Institute	Research Institute	Research Institute	1	0	0	0	0	0	0	1	0	0	0	0	1	0	0	0	0	0	0	0	0	0	0	0	1	Article
52833576	MORE THAN JUST A HOBBY: BUILDING AN ACADEMIC CAREER IN GLOBAL EMERGENCY MEDICINE	JOURNAL OF EMERGENCY MEDICINE	4	5	Toll access article	Toll access	4	Hauswald-M	Hauswald	Mark	Author	5	UNIV-NEW-MEXICO	UNIV-NEW-MEXICO	UNIV-NEW-MEXICO	University	University: Unranked	University: Unranked	University: Unranked	1	0	0	0	0	0	0	1	0	0	0	0	0	0	0	0	0	0	0	0	1	1	0	0	1	Article
53496737	MRSA: A Density-Equalizing Mapping Analysis of the Global Research Architecture	INTERNATIONAL JOURNAL OF ENVIRONMENTAL RESEARCH AND PUBLIC HEALTH	6	3	Gold OA article (APC)	Gold OA	6	Groneberg-DA	Groneberg	David A.	Author, Reprint Author	3	GOETHE-UNIV-FRANKFURT	GOETHE-UNIV-FRANKFURT	GOETHE-UNIV-FRANKFURT	University	University - Rank 201-500	University - Rank 201-500	University - Rank 201-500	1	1650.72	0	1	0	0	0	0	0	0	0	0	0	0	0	0	0	0	1	0	0	1	1	0	1	Article
53708640	Macropsychology, Policy, and Global Health	AMERICAN PSYCHOLOGIST	1	1	Green OA article	Green OA	1	MacLachlan-M	MacLachlan	Malcolm	Author, Reprint Author	1	TRINITY-COLL-DUBLIN	TRINITY-COLL-DUBLIN	TRINITY-COLL-DUBLIN	University	University - Rank 101-200	University - Rank 101-200	University - Rank 101-200	1	0	0	0	0	1	0	0	0	0	0	0	0	0	0	0	0	1	0	0	0	1	0	0	1	Article
44280756	Main Achievements of the World Organisation for Animal Health/United Nations Food and Agriculture Organization Network on Animal Influenza	AVIAN DISEASES	6	5	Toll access article	Toll access	6	Edwards-S	Edwards	Steve	Author	2	WORLD-ORG-ANIM-HLTH	WORLD-ORG-ANIM-HLTH	WORLD-ORG-ANIM-HLTH	Non-profit	Non-profit	Non-profit	Non-profit	1	0	0	0	0	0	0	1	0	0	0	1	0	0	0	0	0	0	0	0	0	0	0	0	1	Article
46558617	Major reductions in global suicide numbers can be made rapidly through pesticide regulation without the need for psychosocial interventions	SOCIAL SCIENCE & MEDICINE	2	2	Green OA article	Green OA	2	Bateman-DN	Bateman	D. Nicholas	Author	1	UNIV-EDINBURGH	UNIV-EDINBURGH	UNIV-EDINBURGH	University	University - Rank 026-050	University - Rank 026-050	University - Rank 026-050	1	0	0	0	0	1	0	0	0	0	0	0	0	0	0	1	0	0	0	0	0	1	0	1	0	Article
47555621	Making new vaccines affordable: a comparison of financing processes used to develop and deploy new meningococcal and pneumococcal conjugate vaccines	LANCET	7	3	Green OA article	Green OA	7	Heymann-DL	Heymann	David L.	Author	2	ROYAL-INST-INT-AFFAIRS	ROYAL-INST-INT-AFFAIRS	ROYAL-INST-INT-AFFAIRS	Non-profit	Non-profit	Non-profit	Non-profit	1	0	0	0	0	1	0	0	0	0	0	1	0	0	0	0	0	0	0	0	0	0	0	0	1	Review
45016130	Making sense of the global economy: 10 resources for health promoters	HEALTH PROMOTION INTERNATIONAL	2	1	Hybrid article	Hybrid	2	Labonte-R	Labonte	Ronald	Author	1	UNIV-OTTAWA	UNIV-OTTAWA	UNIV-OTTAWA	University	University - Rank 201-500	University - Rank 201-500	University - Rank 201-500	1	3000	0	0	0	0	1	0	0	0	0	0	0	0	0	0	0	0	1	0	0	1	1	0	1	Article
53651957	Making the post-MDG global health goals relevant for highly inequitable societies: findings from a consultation with marginalized populations in Guatemala	INTERNATIONAL JOURNAL FOR EQUITY IN HEALTH	4	2	Gold OA article (APC)	Gold OA	4	Flores-W	Flores	Walter	Author	2	CTR-ESTUDIOS-GOBERNANZA-SISTEMAS-SALUD	CTR-ESTUDIOS-EQUIDAD-&-GOBERNANZA-SISTEMAS-SALUD	CTR-ESTUDIOS-EQUIDAD-&-GOBERNANZA-SISTEMAS-SALUD	Research institute	Research Institute	Research Institute	Research Institute	1	2220	0	1	0	0	0	0	0	0	0	0	1	0	0	0	0	0	0	0	0	0	1	0	1	Article
46621502	Malaria and other vector-borne infection surveillance in the US Department of Defense Armed Forces Health Surveillance Center-Global Emerging Infections Surveillance program: review of 2009 accomplishments	BMC PUBLIC HEALTH	28	9	Gold OA article (APC)	Gold OA	28	Russell-KL	Russell	Kevin L.	Author	1	USAF	USAF	USAF	Government	Government	Government	Government	1	2145	0	1	0	0	0	0	0	1	0	0	0	0	0	0	0	0	0	0	0	0	1	0	1	Review
47278216	Management of atrial fibrillation around the world: a comparison of current ACCF/AHA/HRS, CCS, and ESC guidelines	EUROPACE	2	1	Hybrid article	Hybrid	2	Eckardt-L	Eckardt	Lars	Author	1	HOSP-WESTFAL-WILHELMS-UNIV	HOSP-WESTFAL-WILHELMS-UNIV	HOSP-WESTFAL-WILHELMS-UNIV	Hospital	University: Unranked	University-Hospital	Hospital	1	3500	0	0	0	0	1	0	0	0	1	0	0	0	0	0	0	0	0	0	0	0	1	0	1	Review
52885448	Managing Multiple Funding Streams and Agendas to Achieve Local and Global Health and Research Objectives: Lessons From the Field	JAIDS-JOURNAL OF ACQUIRED IMMUNE DEFICIENCY SYNDROMES	16	4	Green OA article	Green OA	16	Moore-CB	Moore	Carolyn Bolton	Author	1	UNIV-N-CAROLINA	UNIV-N-CAROLINA	UNIV-N-CAROLINA	University	University - Rank 051-100	University - Rank 51-100	University - Rank 051-100	1	0	0	0	0	1	0	0	0	0	0	0	0	0	0	0	1	0	0	0	0	1	0	0	1	Article
46861687	Mapping the Global Distribution of Trachoma: Why an Updated Atlas Is Needed	PLOS NEGLECTED TROPICAL DISEASES	8	3	Gold OA article (APC)	Gold OA	8	Brooker-S	Brooker	Simon	Author	1	LONDON-SCH-HYG-&-TROP-MED	UCL	UCL	University	University - Rank 001-025	University - Rank 001-025	University - Rank 001-025	1	2250	0	1	0	0	0	0	0	0	0	0	0	0	1	0	0	0	0	0	0	1	1	1	0	Article
48597568	Mapping the availability, price, and affordability of antiepileptic drugs in 46 countries	EPILEPSIA	7	7	Hybrid article	Hybrid	7	Saxena-S	Saxena	Shekhar	Author	1	WORLD-HLTH-ORG	WHO	WHO	Non-profit	Non-profit	Non-profit	Non-profit	1	3000	0	0	0	0	1	0	0	0	0	1	0	0	0	0	0	0	0	0	0	0	1	0	1	Article
48980314	Mapping the key issues shaping the landscape of global public health	GLOBAL PUBLIC HEALTH	3	3	Toll access article	Toll access	3	Hermosilla-S	Hermosilla	Sabrina	Author	3	COLUMBIA-UNIV	COLUMBIA-UNIV	COLUMBIA-UNIV	University	University - Rank 001-025	University - Rank 001-025	University - Rank 001-025	1	0	0	0	0	0	0	1	0	0	0	0	0	0	1	0	0	0	0	0	0	1	0	1	0	Article
52360952	Maternal and child mortality indicators across 187 countries of the world: Converging or diverging	GLOBAL PUBLIC HEALTH	2	2	Toll access article	Toll access	2	Arokiasamy-P	Arokiasamy	Perianayagam	Author	2	INT-INST-POPULAT-SCI	INT-INST-POPULAT-SCI	INT-INST-POPULAT-SCI	University	University: Unranked	University: Unranked	University: Unranked	1	0	0	0	0	0	0	1	0	0	0	0	0	0	0	0	0	0	0	0	1	1	0	0	1	Article
48119234	Maternal leave policies and vaccination coverage: A global analysis	SOCIAL SCIENCE & MEDICINE	3	3	Toll access article	Toll access	3	Heymann-J	Heymann	Jody	Author	1	MCGILL-UNIV	MCGILL-UNIV	MCGILL-UNIV	University	University - Rank 026-050	University - Rank 026-050	University - Rank 026-050	1	0	0	0	0	0	0	1	0	0	0	0	0	0	0	1	0	0	0	0	0	1	0	1	0	Article
47193094	Maternal mortality and Millennium Development Goal 5	BRITISH MEDICAL BULLETIN	2	2	Toll access article	Toll access	2	Falconer-AD	Falconer	A. D.	Author	2	ROYAL-COLL-OBSTETRICIANS-&-GYNAECOLOGISTS	ROYAL-COLL-PHYSICIANS	ROYAL-COLL-PHYSICIANS	Scientific association	Scientific association	Scientific association	Scientific association	1	0	0	0	0	0	0	1	0	0	0	0	0	1	0	0	0	0	0	0	0	0	0	0	1	Article
50877979	Measuring the Global Burden of Disease	NEW ENGLAND JOURNAL OF MEDICINE	2	2	Delayed OA article	Delayed OA	2	Lopez-AD	Lopez	Alan D.	Author	2	UNIV-MELBOURNE	UNIV-MELBOURNE	UNIV-MELBOURNE	University	University - Rank 026-050	University - Rank 026-050	University - Rank 026-050	1	0	1	0	0	0	0	0	0	0	0	0	0	0	0	1	0	0	0	0	0	1	0	1	0	Article
44311382	Measuring the global burden of low back pain	BEST PRACTICE & RESEARCH IN CLINICAL RHEUMATOLOGY	7	7	Toll access article	Toll access	7	Buchbinder-R	Buchbinder	Rachelle	Author	6	MONASH-UNIV	MONASH-UNIV	MONASH-UNIV	University	University - Rank 051-100	University - Rank 51-100	University - Rank 051-100	1	0	0	0	0	0	0	1	0	0	0	0	0	0	0	0	1	0	0	0	0	1	0	0	1	Article
48464393	Measuring the population burden of chronic kidney disease: a systematic literature review of the estimated prevalence of impaired kidney function	NEPHROLOGY DIALYSIS TRANSPLANTATION	7	3	Hybrid article	Hybrid	7	Black-C	Black	Corri	Author, Reprint Author	1	UNIV-ABERDEEN	UNIV-ABERDEEN	UNIV-ABERDEEN	University	University - Rank 101-200	University - Rank 101-200	University - Rank 101-200	1	2800	0	0	0	0	1	0	0	0	0	0	0	0	0	0	0	1	0	0	0	1	1	0	1	Review
52272343	Medical student electives and learning outcomes for global health: A commentary on behalf of the UK Medical Schools Elective Council	MEDICAL TEACHER	3	3	Hybrid article	Hybrid	3	Eliasz-MK	Eliasz	Michael Kalmus	Author	3	WESTON-EDUC-CTR	WESTON-EDUC-CTR	WESTON-EDUC-CTR	Non-profit	Non-profit	Non-profit	Non-profit	1	2950	0	0	0	0	1	0	0	0	0	1	0	0	0	0	0	0	0	0	0	0	1	0	1	Article
52609108	Medicalization of global health 2: the medicalization of global mental health	GLOBAL HEALTH ACTION	1	2	Gold OA article (APC)	Gold OA	1	Clark-J	Clark	Jocalyn	Author, Reprint Author	1	ICDDR-B	INT-CTR-DIARRHOEAL-DIS-RES	INT-CTR-DIARRHOEAL-DIS-RES	Non-profit	Non-profit	Non-profit	Non-profit	1	1500	0	1	0	0	0	0	0	0	0	1	0	0	0	0	0	0	0	0	0	0	1	0	1	Article
48495711	Meeting Tomorrow's Health Care Needs Through Local and Global Involvement	JOURNAL OF CONTINUING EDUCATION IN NURSING	4	2	Toll access article	Toll access	2	Bond-ML	Bond	Mary Lou	Author	1	UNIV-TEXAS-ARLINGTON	UNIV-TEXAS-ARLINGTON	UNIV-TEXAS-ARLINGTON	University	University - Rank 501+	University - Rank 501+	University - Rank 501+	1	0	0	0	0	0	0	1	0	0	0	0	0	0	0	0	0	0	0	1	0	1	0	0	1	Article
51327203	Meeting the challenge: The evolving global landscape of adult congenital heart disease	INTERNATIONAL JOURNAL OF CARDIOLOGY	12	4	Green OA article	Green OA	12	Diller-GP	Diller	Gerhard-Paul	Author	1	ROYAL-BROMPTON-&-HAREFIELD-NHS-FDN-TRUST	ROYAL-BROMPTON-&-HAREFIELD-NHS-FDN-TRUST	ROYAL-BROMPTON-&-HAREFIELD-NHS-FDN-TRUST	Hospital	University - Rank 001-025	University-Hospital	Hospital	1	0	0	0	0	1	0	0	0	0	1	0	0	0	0	0	0	0	0	0	0	0	0	0	1	Article
44154904	Mental and neurological health research priorities setting in developing countries	SOCIAL PSYCHIATRY AND PSYCHIATRIC EPIDEMIOLOGY	21	21	Green OA article	Green OA	21	Jenkins-R	Jenkins	Rachel	Author, Reprint Author	21	KINGS-COLL-LONDON	KINGS-COLL-LONDON	KINGS-COLL-LONDON	University	University - Rank 026-050	University - Rank 026-050	University - Rank 026-050	1	0	0	0	0	1	0	0	0	0	0	0	0	0	0	1	0	0	0	0	0	1	0	1	0	Article
47504879	Mental health and global well-being	HEALTH PROMOTION INTERNATIONAL	2	3	Hybrid article	Hybrid	2	JaneLlopis-E	Jane-Llopis	Eva	Author	3	WORLD-ECON-FORUM	WORLD-ECON-FORUM	WORLD-ECON-FORUM	Non-profit	Non-profit	Non-profit	Non-profit	1	3000	0	0	0	0	1	0	0	0	0	1	0	0	0	0	0	0	0	0	0	0	1	0	1	Article
46992081	Mental health of the world population: epidemiological aspects (the analysis of foreign research results for 2000-2010)	ZHURNAL NEVROLOGII I PSIKHIATRII IMENI S S KORSAKOVA	4	2	Toll access article	Toll access	1	Mitikhina-IA	Mitikhina	I. A.	Author, Reprint Author	1	RUSSIAN-ACAD-MED-SCI	RUSSIAN-ACAD-SCI	RUSSIAN-ACAD-SCI	University	University: Unranked	University: Unranked	University: Unranked	1	0	0	0	0	0	0	1	0	0	0	0	0	0	0	0	0	0	0	0	1	1	0	0	1	Article
50177422	Metabolic/Bariatric Surgery Worldwide 2011	OBESITY SURGERY	2	1	Green OA article	Green OA	2	Oien-DM	Oien	Danette M.	Author	1	UNIV-MINNESOTA	UNIV-MINNESOTA	UNIV-MINNESOTA	University	University - Rank 051-100	University - Rank 51-100	University - Rank 051-100	1	0	0	0	0	1	0	0	0	0	0	0	0	0	0	0	1	0	0	0	0	1	0	0	1	Article
44941078	Millennium Development Goals and Global Women's and Infants' Health	JOGNN-JOURNAL OF OBSTETRIC GYNECOLOGIC AND NEONATAL NURSING	1	1	Toll access article	Toll access	1	Mattson-S	Mattson	Susan	Author, Reprint Author	1	ARIZONA-STATE-UNIV	ARIZONA-STATE-UNIV	ARIZONA-STATE-UNIV	University	University - Rank 101-200	University - Rank 101-200	University - Rank 101-200	1	0	0	0	0	0	0	1	0	0	0	0	0	0	0	0	0	1	0	0	0	1	0	0	1	Article
53209518	Millennium Development Goals: how public health professionals perceive the achievement of MDGs	GLOBAL HEALTH ACTION	5	3	Gold OA article (APC)	Gold OA	5	Borisch-B	Borisch	Bettina	Author	1	UNIV-GENEVA	UNIV-GENEVA	UNIV-GENEVA	University	University - Rank 101-200	University - Rank 101-200	University - Rank 101-200	1	1500	0	1	0	0	0	0	0	0	0	0	0	0	0	0	0	1	0	0	0	1	1	0	1	Article
52805912	Mobile health for non-communicable diseases in Sub-Saharan Africa: a systematic review of the literature and strategic framework for research	GLOBALIZATION AND HEALTH	6	9	Gold OA article (APC)	Gold OA	6	Velazquez-EJ	Velazquez	Eric J.	Author	1	DUKE-UNIV	DUKE-UNIV	DUKE-UNIV	University	University - Rank 001-025	University - Rank 001-025	University - Rank 001-025	1	2145	0	1	0	0	0	0	0	0	0	0	0	0	1	0	0	0	0	0	0	1	1	1	0	Review
50779944	Modeling health impact of global health programs implemented by Population Services International	BMC PUBLIC HEALTH	5	4	Gold OA article (APC)	Gold OA	5	Stevens-W	Stevens	Warren	Author	4	INDEPENDENT-HLTH-ECON-CONSULTANT	INDEPENDENT-HLTH-ECON-CONSULTANT	INDEPENDENT-HLTH-ECON-CONSULTANT	Company	Company	Company	Company	1	2145	0	1	0	0	0	0	1	0	0	0	0	0	0	0	0	0	0	0	0	0	1	0	1	Article
50201047	Modeling the obesity epidemic: social contagion and its implications for control	THEORETICAL BIOLOGY AND MEDICAL MODELLING	3	4	Gold OA article (APC)	Gold OA	3	Nishiura-H	Nishiura	Hiroshi	Author, Reprint Author	1	UNIV-HONG-KONG	UNIV-HONG-KONG	UNIV-HONG-KONG	University	University - Rank 026-050	University - Rank 026-050	University - Rank 026-050	1	2145	0	1	0	0	0	0	0	0	0	0	0	0	0	1	0	0	0	0	0	1	1	1	0	Article
53336236	Monitoring Progress towards Universal Health Coverage at Country and Global Levels	PLOS MEDICINE	6	2	Gold OA article (APC)	Gold OA	6	Wagstaff-A	Wagstaff	Adam	Author	2	WORLD-BANK-GRP	WORLD-BANK	WORLD-BANK	Non-profit	Non-profit	Non-profit	Non-profit	1	2900	0	1	0	0	0	0	0	0	0	1	0	0	0	0	0	0	0	0	0	0	1	0	1	Article
47437215	Monoprosthesis for anterior vaginal prolapse and stress urinary incontinence: midterm results of an international multicentre prospective study	INTERNATIONAL UROGYNECOLOGY JOURNAL	13	7	Toll access article	Toll access	13	Bandiera-S	Bandiera	Sebastiano	Author	7	UNIV-CATANIA	UNIV-CATANIA	UNIV-CATANIA	University	University - Rank 501+	University - Rank 501+	University - Rank 501+	1	0	0	0	0	0	0	1	0	0	0	0	0	0	0	0	0	0	0	1	0	1	0	0	1	Article
52249587	Mood and anxiety disorders across the adult lifespan: a European perspective	PSYCHOLOGICAL MEDICINE	16	14	Green OA article	Green OA	16	Tomov-T	Tomov	T.	Author	14	ALEXANDROVSAKA-HOSP	ALEXANDROVSAKA-HOSP	ALEXANDROVSAKA-HOSP	Hospital	University: Unranked	University-Hospital	Hospital	1	0	0	0	0	1	0	0	0	0	1	0	0	0	0	0	0	0	0	0	0	0	0	0	1	Article
44114914	Mortality attributable to diabetes: Estimates for the year 2010	DIABETES RESEARCH AND CLINICAL PRACTICE	2	2	Toll access article	Toll access	2	Unwin-N	Unwin	Nigel	Author	2	UNIV-NEWCASTLE	UNIV-NEWCASTLE	UNIV-NEWCASTLE	University	University - Rank 101-200	University - Rank 101-200	University - Rank 101-200	1	0	0	0	0	0	0	1	0	0	0	0	0	0	0	0	0	1	0	0	0	1	0	0	1	Article
51224416	Mortality from ischaemic heart disease by country, region, and age: Statistics from World Health Organisation and United Nations	INTERNATIONAL JOURNAL OF CARDIOLOGY	3	2	Green OA article	Green OA	3	Francis-DP	Francis	Darrel P.	Author	1	NATL-HEART-&-LUNG-INST	NATL-HEART-&-LUNG-INST	NATL-HEART-&-LUNG-INST	University	University - Rank 001-025	University - Rank 001-025	University - Rank 001-025	1	0	0	0	0	1	0	0	0	0	0	0	0	0	1	0	0	0	0	0	0	1	0	1	0	Article
51852620	Mortality landscape in the Global Burden of Diseases, Injuries and Risk Factors Study	EUROPEAN JOURNAL OF INTERNAL MEDICINE	3	5	Toll access article	Toll access	3	Remuzzi-G	Remuzzi	Giuseppe	Author	4	IST-RIC-FARMACOL-MARIO-NEGRI	IST-RIC-FARMACOL-MARIO-NEGRI	IST-RIC-FARMACOL-MARIO-NEGRI	Research institute	Research Institute	Research Institute	Research Institute	1	0	0	0	0	0	0	1	0	0	0	0	1	0	0	0	0	0	0	0	0	0	0	0	1	Review
47258544	Moving beyond behaviour: Advancing HIV risk prevention epistemologies and interventions (A report on the state of the literature)	GLOBAL PUBLIC HEALTH	2	2	Toll access article	Toll access	2	Pirkle-CM	Pirkle	Catherine M.	Author	2	UNIV-MONTREAL	UNIV-MONTREAL	UNIV-MONTREAL	University	University - Rank 101-200	University - Rank 101-200	University - Rank 101-200	1	0	0	0	0	0	0	1	0	0	0	0	0	0	0	0	0	1	0	0	0	1	0	0	1	Article
46442665	Multi-country, cross-national comparison of youth tobacco use: Findings from Global School-based Health Surveys	ADDICTIVE BEHAVIORS	2	1	Toll access article	Toll access	2	Danielson-M	Danielson	Mallory	Author	1	BRIGHAM-YOUNG-UNIV	BRIGHAM-YOUNG-UNIV	BRIGHAM-YOUNG-UNIV	University	University: Unranked	University: Unranked	University: Unranked	1	0	0	0	0	0	0	1	0	0	0	0	0	0	0	0	0	0	0	0	1	1	0	0	1	Article
48609149	Multiple crises and global health: New and necessary frontiers of health politics	GLOBAL PUBLIC HEALTH	1	2	Green OA article	Green OA	1	Schrecker-T	Schrecker	Ted	Author, Reprint Author	1	UNIV-OTTAWA	UNIV-OTTAWA	UNIV-OTTAWA	University	University - Rank 201-500	University - Rank 201-500	University - Rank 201-500	1	0	0	0	0	1	0	0	0	0	0	0	0	0	0	0	0	0	1	0	0	1	0	0	1	Article
50938785	Mycotoxin occurrence in feed and feed raw materials worldwide: long-term analysis with special focus on Europe and Asia	JOURNAL OF THE SCIENCE OF FOOD AND AGRICULTURE	4	3	Toll access article	Toll access	4	Schatzmayr-G	Schatzmayr	Gerd	Author, Reprint Author	1	BIOMIN-RES-CTR	BIOMIN	BIOMIN	Company	Company	Company	Company	1	0	0	0	0	0	0	1	1	0	0	0	0	0	0	0	0	0	0	0	0	0	0	0	1	Review
53639802	Nanomedicine for Global Health	JALA	8	6	Toll access article	Toll access	8	Ho-D	Ho	Dean	Author	1	UCLA-SCH-DENT	UCLA	UCLA	University	University - Rank 001-025	University - Rank 001-025	University - Rank 001-025	1	0	0	0	0	0	0	1	0	0	0	0	0	0	1	0	0	0	0	0	0	1	0	1	0	Review
44608738	Nanosilver and global public health: international regulatory issues	NANOMEDICINE	2	2	Toll access article	Toll access	2	Watal-A	Watal	Aparna	Author	1	AUSTRALIAN-NATL-UNIV	AUSTRALIAN-NATL-UNIV	AUSTRALIAN-NATL-UNIV	University	University - Rank 026-050	University - Rank 026-050	University - Rank 026-050	1	0	0	0	0	0	0	1	0	0	0	0	0	0	0	1	0	0	0	0	0	1	0	1	0	Review
53096351	National health policy-makers' views on the clarity and utility of Countdown to 2015 country profiles and reports: findings from two exploratory qualitative studies	HEALTH RESEARCH POLICY AND SYSTEMS	5	5	Gold OA article (APC)	Gold OA	5	Murray-SF	Murray	Susan F.	Author	1	KINGS-COLL-LONDON	KINGS-COLL-LONDON	KINGS-COLL-LONDON	University	University - Rank 026-050	University - Rank 026-050	University - Rank 026-050	1	2300	0	1	0	0	0	0	0	0	0	0	0	0	0	1	0	0	0	0	0	1	1	1	0	Article
49658248	National, Regional, and Global Trends in Infertility Prevalence Since 1990: A Systematic Analysis of 277 Health Surveys	PLOS MEDICINE	5	5	Gold OA article (APC)	Gold OA	5	Stevens-GA	Stevens	Gretchen A.	Author	4	WHO	WHO	WHO	Non-profit	Non-profit	Non-profit	Non-profit	1	2900	0	1	0	0	0	0	0	0	0	1	0	0	0	0	0	0	0	0	0	0	1	0	1	Article
46272632	National, regional, and global trends in body-mass index since 1980: systematic analysis of health examination surveys and epidemiological studies with 960 country-years and 9.1 million participants	LANCET	13	8	Green OA article	Green OA	13	Ezzati-M	Ezzati	Majid	Author, Reprint Author	1	UNIV-LONDON-IMPERIAL-COLL-SCI-TECHNOL-&-MED	UNIV-LONDON-IMPERIAL-COLL-SCI-TECHNOL-&-MED	UNIV-LONDON-IMPERIAL-COLL-SCI-TECHNOL-&-MED	University	University - Rank 001-025	University - Rank 001-025	University - Rank 001-025	1	0	0	0	0	1	0	0	0	0	0	0	0	0	1	0	0	0	0	0	0	1	0	1	0	Article
46926349	National, regional, and global trends in fasting plasma glucose and diabetes prevalence since 1980: systematic analysis of health examination surveys and epidemiological studies with 370 country-years and 2.7 million participants	LANCET	15	11	Toll access article	Toll access	15	Ezzati-M	Ezzati	Majid	Author, Reprint Author	1	UNIV-LONDON-IMPERIAL-COLL-SCI-TECHNOL-&-MED	UNIV-LONDON-IMPERIAL-COLL-SCI-TECHNOL-&-MED	UNIV-LONDON-IMPERIAL-COLL-SCI-TECHNOL-&-MED	University	University - Rank 001-025	University - Rank 001-025	University - Rank 001-025	1	0	0	0	0	0	0	1	0	0	0	0	0	0	1	0	0	0	0	0	0	1	0	1	0	Article
46272634	National, regional, and global trends in serum total cholesterol since 1980: systematic analysis of health examination surveys and epidemiological studies with 321 country-years and 3.0 million participants	LANCET	11	9	Green OA article	Green OA	11	Ezzati-M	Ezzati	Majid	Author, Reprint Author	1	UNIV-LONDON-IMPERIAL-COLL-SCI-TECHNOL-&-MED	UNIV-LONDON-IMPERIAL-COLL-SCI-TECHNOL-&-MED	UNIV-LONDON-IMPERIAL-COLL-SCI-TECHNOL-&-MED	University	University - Rank 001-025	University - Rank 001-025	University - Rank 001-025	1	0	0	0	0	1	0	0	0	0	0	0	0	0	1	0	0	0	0	0	0	1	0	1	0	Article
46272633	National, regional, and global trends in systolic blood pressure since 1980: systematic analysis of health examination surveys and epidemiological studies with 786 country-years and 5.4 million participants	LANCET	11	9	Toll access article	Toll access	11	Ezzati-M	Ezzati	Majid	Author, Reprint Author	1	UNIV-LONDON-IMPERIAL-COLL-SCI-TECHNOL-&-MED	UNIV-LONDON-IMPERIAL-COLL-SCI-TECHNOL-&-MED	UNIV-LONDON-IMPERIAL-COLL-SCI-TECHNOL-&-MED	University	University - Rank 001-025	University - Rank 001-025	University - Rank 001-025	1	0	0	0	0	0	0	1	0	0	0	0	0	0	1	0	0	0	0	0	0	1	0	1	0	Article
48626118	National, regional, and worldwide estimates of preterm birth rates in the year 2010 with time trends since 1990 for selected countries: a systematic analysis and implications	LANCET	11	4	Green OA article	Green OA	11	Lawn-JE	Lawn	Joy E.	Author, Reprint Author	1	SAVE-CHILDREN	SAVE-CHILDREN	SAVE-CHILDREN	Non-profit	Non-profit	Non-profit	Non-profit	1	0	0	0	0	1	0	0	0	0	0	1	0	0	0	0	0	0	0	0	0	0	0	0	1	Article
45210614	Navigating the Challenges of Global Reproductive Health Research	JOURNAL OF WOMENS HEALTH	4	3	Green OA article	Green OA	4	Miller-S	Miller	Suellen	Author	3	UNIV-CALIF-SAN-FRANCISCO	UCSF	UCSF	University	University - Rank 001-025	University - Rank 001-025	University - Rank 001-025	1	0	0	0	0	1	0	0	0	0	0	0	0	0	1	0	0	0	0	0	0	1	0	1	0	Article
43957453	Neglected Tropical Diseases 2 Integration of control of neglected tropical diseases into health-care systems: challenges and opportunities	LANCET	7	3	Green OA article	Green OA	7	Adjei-S	Adjei	Sam	Author	3	PUBL-HLTH-CONSULTANT	PUBL-HLTH-CONSULTANT	PUBL-HLTH-CONSULTANT	Company	Company	Company	Company	1	0	0	0	0	1	0	0	1	0	0	0	0	0	0	0	0	0	0	0	0	0	0	0	1	Article
53521760	Neglected tropical disease and emerging infectious disease: An analysis of the history, promise and constraints of two worldviews	GLOBAL PUBLIC HEALTH	2	2	Toll access article	Toll access	2	Stephenson-N	Stephenson	Niamh	Author	1	UNIV-NEW-S-WALES	UNIV-NEW-S-WALES	UNIV-NEW-S-WALES	University	University - Rank 051-100	University - Rank 51-100	University - Rank 051-100	1	0	0	0	0	0	0	1	0	0	0	0	0	0	0	0	1	0	0	0	0	1	0	0	1	Article
48955695	Neonatal Death in Low- to Middle-Income Countries: A Global Network Study	AMERICAN JOURNAL OF PERINATOLOGY	23	18	Green OA article	Green OA	23	Goldenberg-RL	Goldenberg	Robert L.	Author	18	COLUMBIA-UNIV	COLUMBIA-UNIV	COLUMBIA-UNIV	University	University - Rank 001-025	University - Rank 001-025	University - Rank 001-025	1	0	0	0	0	1	0	0	0	0	0	0	0	0	1	0	0	0	0	0	0	1	0	1	0	Article
52035065	Neonatal hyperbilirubinemia and Rhesus disease of the newborn: incidence and impairment estimates for 2010 at regional and global levels	PEDIATRIC RESEARCH	18	18	Green OA article	Green OA	18	Lawn-JE	Lawn	Joy E.	Author	17	LONDON-SCH-HYG-&-TROP-MED	UCL	UCL	University	University - Rank 001-025	University - Rank 001-025	University - Rank 001-025	1	0	0	0	0	1	0	0	0	0	0	0	0	0	1	0	0	0	0	0	0	1	0	1	0	Article
46741492	New Academic Partnerships in Global Health: Innovations at Mount Sinai School of Medicine	MOUNT SINAI JOURNAL OF MEDICINE	10	3	Green OA article	Green OA	10	Koplan-JP	Koplan	Jeffrey P.	Author	3	EMORY-UNIV	EMORY-UNIV	EMORY-UNIV	University	University - Rank 051-100	University - Rank 51-100	University - Rank 051-100	1	0	0	0	0	1	0	0	0	0	0	0	0	0	0	0	1	0	0	0	0	1	0	0	1	Article
47098623	New Decade of Vaccines 5 Addressing the vaccine confidence gap	LANCET	5	5	Toll access article	Toll access	5	Ratzan-S	Ratzan	Scott	Author	5	JOHNSON-&-JOHNSON	JOHNSON-&-JOHNSON	JOHNSON-&-JOHNSON	Company	Company	Company	Company	1	0	0	0	0	0	0	1	1	0	0	0	0	0	0	0	0	0	0	0	0	0	0	0	1	Article
52242111	New GOLD classification: longitudinal data on group assignment	RESPIRATORY RESEARCH	22	25	Gold OA article (APC)	Gold OA	22	deTorres-JP	de-Torres	Juan P.	Author	24	UNIV-NAVARRA-CLIN	UNIV-NAVARRA	UNIV-NAVARRA	University	University: Unranked	University: Unranked	University: Unranked	1	2525	0	1	0	0	0	0	0	0	0	0	0	0	0	0	0	0	0	0	1	1	1	0	1	Article
47927791	New Insights in the Clinical Understanding of Behcet's Disease	YONSEI MEDICAL JOURNAL	3	1	Gold OA article (non-APC)	Gold OA	3	Bang-D	Bang	Dongsik	Author, Reprint Author	1	YONSEI-UNIV	YONSEI-UNIV	YONSEI-UNIV	University	University - Rank 201-500	University - Rank 201-500	University - Rank 201-500	1	0	0	0	1	0	0	0	0	0	0	0	0	0	0	0	0	0	1	0	0	1	0	0	1	Review
44350084	New and improved tuberculosis diagnostics: evidence, policy, practice, and impact	CURRENT OPINION IN PULMONARY MEDICINE	4	3	Green OA article	Green OA	4	Ramsay-A	Ramsay	Andrew	Author	3	WHO	WHO	WHO	Non-profit	Non-profit	Non-profit	Non-profit	1	0	0	0	0	1	0	0	0	0	0	1	0	0	0	0	0	0	0	0	0	0	0	0	1	Article
49552310	New life in old frames: HIV, development and the 'AIDS plus MDGs' approach	GLOBAL PUBLIC HEALTH	3	1	Green OA article	Green OA	3	Rushton-S	Rushton	Simon	Author, Reprint Author	1	ABERYSTWYTH-UNIV	ABERYSTWYTH-UNIV	ABERYSTWYTH-UNIV	University	University - Rank 201-500	University - Rank 201-500	University - Rank 201-500	1	0	0	0	0	1	0	0	0	0	0	0	0	0	0	0	0	0	1	0	0	1	0	0	1	Article
49810206	No Health without Mental Health: Challenges and Opportunities in Global Mental Health	AFRICAN JOURNAL OF PSYCHIATRY	2	3	Gold OA article (non-APC)	Gold OA	2	Skeen-S	Skeen	S.	Author, Reprint Author	1	UNIV-STELLENBOSCH	UNIV-STELLENBOSCH	UNIV-STELLENBOSCH	University	University - Rank 201-500	University - Rank 201-500	University - Rank 201-500	1	0	0	0	1	0	0	0	0	0	0	0	0	0	0	0	0	0	1	0	0	1	0	0	1	Review
53755570	Non-Communicable Diseases (NCDs) in developing countries: a symposium report	GLOBALIZATION AND HEALTH	6	4	Gold OA article (APC)	Gold OA	6	Froschl-G	Froeschl	Guenter	Author	1	UNIV-MUNICH	UNIV-MUNICH	UNIV-MUNICH	University	University - Rank 026-050	University - Rank 026-050	University - Rank 026-050	1	2145	0	1	0	0	0	0	0	0	0	0	0	0	0	1	0	0	0	0	0	1	1	1	0	Article
49161214	Non-communicable diseases: Harnessing the current opportunities	SCANDINAVIAN JOURNAL OF PUBLIC HEALTH	6	1	Green OA article	Green OA	1	Sorensen-JB	Sorensen	Jane Brandt	Author, Reprint Author	1	UNIV-COPENHAGEN	UNIV-COPENHAGEN	UNIV-COPENHAGEN	University	University - Rank 101-200	University - Rank 101-200	University - Rank 101-200	1	0	0	0	0	1	0	0	0	0	0	0	0	0	0	0	0	1	0	0	0	1	0	0	1	Article
52475430	Noncommunicable diseases among urban refugees and asylum-seekers in developing countries: a neglected health care need	GLOBALIZATION AND HEALTH	2	3	Gold OA article (APC)	Gold OA	2	Aljunid-SM	Aljunid	Syed Mohamed	Author	2	UNU-IIGH	UNU-IIGH	UNU-IIGH	University	University: Unranked	University: Unranked	University: Unranked	1	2145	0	1	0	0	0	0	0	0	0	0	0	0	0	0	0	0	0	0	1	1	1	0	1	Review
52440248	Notification of animal and human diseases: the global legal basis	REVUE SCIENTIFIQUE ET TECHNIQUE DE L OFFICE INTERNATIONAL DES EPIZOOTIES	4	1	Toll access article	Toll access	4	Dehove-A	Dehove	A.	Author	1	WORLD-ORG-ANIM-HLTH-OIE	WORLD-ORG-ANIM-HLTH	WORLD-ORG-ANIM-HLTH	Non-profit	Non-profit	Non-profit	Non-profit	1	0	0	0	0	0	0	1	0	0	0	1	0	0	0	0	0	0	0	0	0	0	0	0	1	Article
49061976	Nurse-based models for cardiovascular disease prevention From research to clinical practice	EUROPEAN JOURNAL OF CARDIOVASCULAR NURSING	3	4	Toll access article	Toll access	3	Jennings-C	Jennings	Catriona	Author	3	IMPERIAL-COLL-LONDON	IMPERIAL-COLL-SCI-&-MED	IMPERIAL-COLL-SCI-&-MED	University	University - Rank 001-025	University - Rank 001-025	University - Rank 001-025	1	0	0	0	0	0	0	1	0	0	0	0	0	0	1	0	0	0	0	0	0	1	0	1	0	Article
50051112	Nurses' engagement in AIDS policy development	INTERNATIONAL NURSING REVIEW	7	3	Green OA article	Green OA	5	Etowa-J	Etowa	J.	Author	2	UNIV-OTTAWA	UNIV-OTTAWA	UNIV-OTTAWA	University	University - Rank 201-500	University - Rank 201-500	University - Rank 201-500	1	0	0	0	0	1	0	0	0	0	0	0	0	0	0	0	0	0	1	0	0	1	0	0	1	Article
48970746	Nurses' potential to lead in non-communicable disease global crisis	INTERNATIONAL NURSING REVIEW	4	4	Toll access article	Toll access	4	Matebeni-D	Matebeni	D.	Author	4	DEMOCRAT-NURSING-ASSOC	DEMOCRAT-NURSING-ASSOC	DEMOCRAT-NURSING-ASSOC	Scientific association	Scientific association	Scientific association	Scientific association	1	0	0	0	0	0	0	1	0	0	0	0	0	1	0	0	0	0	0	0	0	0	0	0	1	Article
53468768	ONE HEALTH Rabies control and elimination: a test case for One Health	VETERINARY RECORD	5	1	Green OA article	Green OA	5	Hampson-K	Hampson	Katie	Author	1	UNIV-GLASGOW	UNIV-GLASGOW	UNIV-GLASGOW	University	University - Rank 051-100	University - Rank 51-100	University - Rank 051-100	1	0	0	0	0	1	0	0	0	0	0	0	0	0	0	0	1	0	0	0	0	1	0	0	1	Article
49622015	Obesity and cancer risk: evidence, mechanisms, and recommendations	ANNALS OF THE NEW YORK ACADEMY OF SCIENCES	2	3	Green OA article	Green OA	2	Stains-JP	Stains	Joseph P.	Author	3	UNIV-MARYLAND	UNIV-MARYLAND	UNIV-MARYLAND	University	University - Rank 051-100	University - Rank 51-100	University - Rank 051-100	1	0	0	0	0	1	0	0	0	0	0	0	0	0	0	0	1	0	0	0	0	1	0	0	1	Article
45328846	Obesity in children & adolescents	INDIAN JOURNAL OF MEDICAL RESEARCH	2	1	Gold OA article (non-APC)	Gold OA	1	Raj-M	Raj	Manu	Author, Reprint Author	1	AMRITA-INST-MED-SCI-&-RES-CTR	AMRITA-INST-MED-SCI-&-RES-CTR	AMRITA-INST-MED-SCI-&-RES-CTR	University	University - Rank 501+	University - Rank 501+	University - Rank 501+	1	0	0	0	1	0	0	0	0	0	0	0	0	0	0	0	0	0	0	1	0	1	0	0	1	Review
49701804	Obesity: The BIG issue	ACTA PHYSIOLOGICA	2	1	Toll access article	Toll access	2	Persson-AB	Persson	A. Bondke	Author	1	CHARITE	CHARITE	CHARITE	Hospital	University - Rank 051-100	University-Hospital	Hospital	1	0	0	0	0	0	0	1	0	0	1	0	0	0	0	0	0	0	0	0	0	0	0	0	1	Article
46638572	Of silver bullets and red herrings: invited commentary to Fisk et al.	TROPICAL MEDICINE & INTERNATIONAL HEALTH	3	3	Hybrid article	Hybrid	3	Nayar-KR	Nayar	K. R.	Author	3	JAWAHARLAL-NEHRU-UNIV	JAWAHARLAL-NEHRU-UNIV	JAWAHARLAL-NEHRU-UNIV	University	University: Unranked	University: Unranked	University: Unranked	1	3000	0	0	0	0	1	0	0	0	0	0	0	0	0	0	0	0	0	0	1	1	1	0	1	Article
52201143	On Academics INCORPORATING GLOBAL HEALTH COMPETENCIES INTO THE PUBLIC HEALTH CURRICULUM	PUBLIC HEALTH REPORTS	5	2	Green OA article	Green OA	5	Curran-JW	Curran	James W.	Author	2	EMORY-UNIV	EMORY-UNIV	EMORY-UNIV	University	University - Rank 051-100	University - Rank 51-100	University - Rank 051-100	1	0	0	0	0	1	0	0	0	0	0	0	0	0	0	0	1	0	0	0	0	1	0	0	1	Article
53440350	One Health in a world with climate change	REVUE SCIENTIFIQUE ET TECHNIQUE DE L OFFICE INTERNATIONAL DES EPIZOOTIES	2	2	Toll access article	Toll access	2	Butler-CD	Butler	C. D.	Author	2	UNIV-CANBERRA	UNIV-CANBERRA	UNIV-CANBERRA	University	University - Rank 201-500	University - Rank 201-500	University - Rank 201-500	1	0	0	0	0	0	0	1	0	0	0	0	0	0	0	0	0	0	1	0	0	1	0	0	1	Article
53440362	One Health in social networks and social media	REVUE SCIENTIFIQUE ET TECHNIQUE DE L OFFICE INTERNATIONAL DES EPIZOOTIES	2	2	Green OA article	Green OA	2	Brownstein-JS	Brownstein	J. S.	Author, Reprint Author	1	BOSTON-CHILDRENS-HOSP	BOSTON-CHILDRENS-HOSP	BOSTON-CHILDRENS-HOSP	Hospital	University - Rank 001-025	University-Hospital	Hospital	1	0	0	0	0	1	0	0	0	0	1	0	0	0	0	0	0	0	0	0	0	0	0	0	1	Article
53440344	One Health: a perspective from the human health sector	REVUE SCIENTIFIQUE ET TECHNIQUE DE L OFFICE INTERNATIONAL DES EPIZOOTIES	3	3	Toll access article	Toll access	3	Hossain-SS	Hossain	S. S.	Author	3	US-EMBASSY	US-EMBASSY	US-EMBASSY	Government	Government	Government	Government	1	0	0	0	0	0	0	1	0	1	0	0	0	0	0	0	0	0	0	0	0	0	0	0	1	Article
50719588	Operationalizing a One Health approach to global health challenges	COMPARATIVE IMMUNOLOGY MICROBIOLOGY AND INFECTIOUS DISEASES	3	3	Toll access article	Toll access	3	Dumit-J	Dumit	Joe	Author	3	UNIV-CALIF-DAVIS	UNIV-CALIF-DAVIS	UNIV-CALIF-DAVIS	University	University - Rank 051-100	University - Rank 51-100	University - Rank 051-100	1	0	0	0	0	0	0	1	0	0	0	0	0	0	0	0	1	0	0	0	0	1	0	0	1	Article
47238583	Optimizing Revascularization Strategies in Coronary Artery Disease for Optimal Benefit to Patients	CLINICAL PHARMACOLOGY & THERAPEUTICS	4	2	Toll access article	Toll access	4	Bartunek-J	Bartunek	J.	Author, Reprint Author	1	ONZE-LIEVE-VROUW-HOSP	ONZE-LIEVE-VROUW-HOSP	ONZE-LIEVE-VROUW-HOSP	Hospital	Hospital	Hospital	Hospital	1	0	0	0	0	0	0	1	0	0	1	0	0	0	0	0	0	0	0	0	0	0	0	0	1	Article
44585558	Overview and Determinants of Cardiovascular Disease in Indigenous Populations	HEART LUNG AND CIRCULATION	9	8	Green OA article	Green OA	9	White-H	White	Harvey	Author	8	AUCKLAND-CITY-HOSP	AUCKLAND-CITY-HOSP	AUCKLAND-CITY-HOSP	Hospital	Hospital	Hospital	Hospital	1	0	0	0	0	1	0	0	0	0	1	0	0	0	0	0	0	0	0	0	0	0	0	0	1	Article
44748596	Overweight and obesity in children and adolescents. The worldwide situation	BUNDESGESUNDHEITSBLATT-GESUNDHEITSFORSCHUNG-GESUNDHEITSSCHUTZ	4	1	Toll access article	Toll access	4	Ahrens-W	Ahrens	W.	Author	1	UNIV-BREMEN	UNIV-BREMEN	UNIV-BREMEN	University	University - Rank 201-500	University - Rank 201-500	University - Rank 201-500	1	0	0	0	0	0	0	1	0	0	0	0	0	0	0	0	0	0	1	0	0	1	0	0	1	Article
48879432	PEPFAR Support for the Scaling Up of Collaborative TB/HIV Activities	JAIDS-JOURNAL OF ACQUIRED IMMUNE DEFICIENCY SYNDROMES	9	11	Green OA article	Green OA	9	Coggin-WL	Coggin	William L.	Author	11	US-PRESIDENTS-EMERGENCY-PLAN-AIDS-RELIEF	US-PRESIDENTS-EMERGENCY-PLAN-AIDS-RELIEF	US-PRESIDENTS-EMERGENCY-PLAN-AIDS-RELIEF	Government	Government	Government	Government	1	0	0	0	0	1	0	0	0	1	0	0	0	0	0	0	0	0	0	0	0	0	0	0	1	Article
48879433	PEPFAR's Evolving HIV Prevention Approaches for Key Populations-People Who Inject Drugs, Men Who Have Sex With Men, and Sex Workers: Progress, Challenges, and Opportunities	JAIDS-JOURNAL OF ACQUIRED IMMUNE DEFICIENCY SYNDROMES	10	9	Green OA article	Green OA	10	Pick-B	Pick	Billy	Author	9	US-AGCY-INT-DEV	US-AGCY-INT-DEV	US-AGCY-INT-DEV	Government	Government	Government	Government	1	0	0	0	0	1	0	0	0	1	0	0	0	0	0	0	0	0	0	0	0	0	0	0	1	Article
48879429	PEPFAR, Health System Strengthening, and Promoting Sustainability and Country Ownership	JAIDS-JOURNAL OF ACQUIRED IMMUNE DEFICIENCY SYNDROMES	9	6	Green OA article	Green OA	9	Lion-A	Lion	Ann	Author	1	ABT-ASSOCIATES-INC	ABT-ASSOCIATES-INC	ABT-ASSOCIATES-INC	Company	Company	Company	Company	1	0	0	0	0	1	0	0	1	0	0	0	0	0	0	0	0	0	0	0	0	0	0	0	1	Article
44233807	PNEUMOCOCCAL CONJUGATE VACCINES IN THE PREVENTION OF CHILDHOOD PNEUMONIA PREVENTION OF CHILDHOOD PNEUMONIA	ACTA MICROBIOLOGICA ET IMMUNOLOGICA HUNGARICA	1	2	Green OA article	Green OA	1	Ivady-B	Ivady	B.	Author, Reprint Author	1	SZENT-ISTVAN-HOSP	SZENT-ISTVAN-HOSP	SZENT-ISTVAN-HOSP	Hospital	Hospital	Hospital	Hospital	1	0	0	0	0	1	0	0	0	0	1	0	0	0	0	0	0	0	0	0	0	0	0	0	1	Article
44293138	PRACTICE-BASED LEARNING IN GLOBAL YOUTH TOBACCO PREVENTION RESEARCH AT THE UNIVERSITY OF TEXAS MASTER OF PUBLIC HEALTH PROGRAM	PUBLIC HEALTH REPORTS	6	3	Green OA article	Green OA	6	Reddy-KS	Reddy	K. Srinath	Author	3	PUBL-HLTH-FDN-INDIA	PUBL-HLTH-FDN-INDIA	PUBL-HLTH-FDN-INDIA	Non-profit	Non-profit	Non-profit	Non-profit	1	0	0	0	0	1	0	0	0	0	0	1	0	0	0	0	0	0	0	0	0	0	0	0	1	Article
51855957	PRIORITY SETTING IN GLOBAL HEALTH: TOWARDS A MINIMUM DALY VALUE	HEALTH ECONOMICS	1	2	Toll access article	Toll access	1	Drake-T	Drake	Tom	Author, Reprint Author	1	LONDON-SCH-HYG-&-TROP-MED	UCL	UCL	University	University - Rank 001-025	University - Rank 001-025	University - Rank 001-025	1	0	0	0	0	0	0	1	0	0	0	0	0	0	1	0	0	0	0	0	0	1	0	1	0	Article
44021958	PROSPECTS FOR A GENUINE REVIVAL OF PRIMARY HEALTH CARE-THROUGH THE VISIBLE HAND OF SOCIAL JUSTICE RATHER THAN THE INVISIBLE HAND OF THE MARKET: PART II	INTERNATIONAL JOURNAL OF HEALTH SERVICES	1	1	Toll access article	Toll access	1	Katz-AR	Katz	Alison Rosamund	Author, Reprint Author	1	WORLD-HLTH-ORG	WHO	WHO	Non-profit	Non-profit	Non-profit	Non-profit	1	0	0	0	0	0	0	1	0	0	0	1	0	0	0	0	0	0	0	0	0	0	0	0	1	Article
47405065	Pain as a global public health priority	BMC PUBLIC HEALTH	2	2	Gold OA article (APC)	Gold OA	2	McGee-SJ	McGee	Summer J.	Author	2	UNIV-KANSAS	UNIV-KANSAS	UNIV-KANSAS	University	University - Rank 201-500	University - Rank 201-500	University - Rank 201-500	1	2145	0	1	0	0	0	0	0	0	0	0	0	0	0	0	0	0	1	0	0	1	1	0	1	Article
47900256	Pancreatic cancer: Overview of descriptive epidemiology	MOLECULAR CARCINOGENESIS	6	7	Toll access article	Toll access	6	Boffetta-P	Boffetta	Paolo	Author	5	MT-SINAI-SCH-MED	MT-SINAI-MED-CTR	MT-SINAI-MED-CTR	Hospital	University - Rank 026-050	University-Hospital	Hospital	1	0	0	0	0	0	0	1	0	0	1	0	0	0	0	0	0	0	0	0	0	0	0	0	1	Article
47516259	Parental psychopathology and the risk of suicidal behavior in their offspring: results from the World Mental Health surveys	MOLECULAR PSYCHIATRY	28	25	Green OA article	Green OA	28	Nock-MK	Nock	M. K.	Author	24	HARVARD-UNIV	HARVARD-UNIV	HARVARD-UNIV	University	University - Rank 001-025	University - Rank 001-025	University - Rank 001-025	1	0	0	0	0	1	0	0	0	0	0	0	0	0	1	0	0	0	0	0	0	1	0	1	0	Article
52603316	Partnering to solve the problem of tuberculosis	PEDIATRIC RADIOLOGY	2	2	Toll access article	Toll access	2	Dehaye-A	Dehaye	Amanda	Author	2	WFPI	WFPI	WFPI	Scientific association	Scientific association	Scientific association	Scientific association	1	0	0	0	0	0	0	1	0	0	0	0	0	1	0	0	0	0	0	0	0	0	0	0	1	Article
44064667	Patient safety research: an overview of the global evidence	QUALITY & SAFETY IN HEALTH CARE	4	4	Toll access article	Toll access	4	Bates-DW	Bates	D. W.	Author	1	HARVARD-UNIV	HARVARD-UNIV	HARVARD-UNIV	University	University - Rank 001-025	University - Rank 001-025	University - Rank 001-025	1	0	0	0	0	0	0	1	0	0	0	0	0	0	1	0	0	0	0	0	0	1	0	1	0	Article
51940016	Peace Through a Healing Transformation of Human Dignity Possibilities and Dilemmas in Global Health and Peace	ADVANCES IN NURSING SCIENCE	1	3	Toll access article	Toll access	1	Perry-DJ	Perry	Donna J.	Author, Reprint Author	1	UNIV-MASSACHUSETTS-WORCESTER	UNIV-MASSACHUSETTS	UNIV-MASSACHUSETTS	University	University - Rank 101-200	University - Rank 101-200	University - Rank 101-200	1	0	0	0	0	0	0	1	0	0	0	0	0	0	0	0	0	1	0	0	0	1	0	0	1	Article
51486308	Pediatric Global Health Education: Correlation of Website Information and Curriculum	JOURNAL OF PEDIATRICS	5	3	Toll access article	Toll access	5	Moreno-MA	Moreno	Megan A.	Author	2	UNIV-WISCONSIN	UNIV-WISCONSIN	UNIV-WISCONSIN	University	University - Rank 026-050	University - Rank 026-050	University - Rank 026-050	1	0	0	0	0	0	0	1	0	0	0	0	0	0	0	1	0	0	0	0	0	1	0	1	0	Article
48608776	People's policies for the health of the poor globally	INTERNATIONAL JOURNAL OF HEALTH PLANNING AND MANAGEMENT	2	1	Toll access article	Toll access	1	Govender-V	Govender	Veloshnee	Author, Reprint Author	1	UNIV-CAPE-TOWN	UNIV-CAPE-TOWN	UNIV-CAPE-TOWN	University	University - Rank 101-200	University - Rank 101-200	University - Rank 101-200	1	0	0	0	0	0	0	1	0	0	0	0	0	0	0	0	0	1	0	0	0	1	0	0	1	Review
52430397	Perceptions of a short-term medical programme in the Dominican Republic: Voices of care recipients	GLOBAL PUBLIC HEALTH	4	4	Green OA article	Green OA	4	Sugarman-J	Sugarman	Jeremy	Author	1	JOHNS-HOPKINS-UNIV	JOHNS-HOPKINS-UNIV	JOHNS-HOPKINS-UNIV	University	University - Rank 001-025	University - Rank 001-025	University - Rank 001-025	1	0	0	0	0	1	0	0	0	0	0	0	0	0	1	0	0	0	0	0	0	1	0	1	0	Article
45089705	Perceptions of tobacco health warnings in China compared with picture and text-only health warnings from other countries: an experimental study	TOBACCO CONTROL	7	3	Green OA article	Green OA	4	Li-QA	Li	Qiang	Author	3	CHINA-CTR-DIS-CONTROL-&-PREVENT	CHINA-CDC	CHINA-CDC	Government	Government	Government	Government	1	0	0	0	0	1	0	0	0	1	0	0	0	0	0	0	0	0	0	0	0	0	0	0	1	Article
44646523	Percolation of influenza AH1N1 epidemic in the world: Usefulness of the spatial-connectivity models	REVISTA MEDICA DE CHILE	2	2	Gold OA article (APC)	Gold OA	2	Canals-A	Canals C	Andrea	Author	2	PONTIFICIA-UNIV-CATOLICA-CHILE	PONTIFICIA-UNIV-CATOLICA-CHILE	PONTIFICIA-UNIV-CATOLICA-CHILE	University	University - Rank 201-500	University - Rank 201-500	University - Rank 201-500	1	100	0	1	0	0	0	0	0	0	0	0	0	0	0	0	0	0	1	0	0	1	1	0	1	Article
53453855	Persistent inequalities in child undernutrition: evidence from 80 countries, from 1990 to today	INTERNATIONAL JOURNAL OF EPIDEMIOLOGY	3	2	Green OA article	Green OA	3	VandePoel-E	Van de Poel	Ellen	Author	2	ERASMUS-UNIV	ERASMUS-UNIV	ERASMUS-UNIV	University	University - Rank 051-100	University - Rank 51-100	University - Rank 051-100	1	0	0	0	0	1	0	0	0	0	0	0	0	0	0	0	1	0	0	0	0	1	0	0	1	Article
53518073	Perspective Piece Global Health Research in Narrative: A Qualitative Look at the FICRS-F Experience	AMERICAN JOURNAL OF TROPICAL MEDICINE AND HYGIENE	12	10	Green OA article	Green OA	12	Heimburger-DC	Heimburger	Douglas C.	Author, Reprint Author	9	VANDERBILT-INST-GLOBAL-HLTH	VANDERBILT-UNIV	VANDERBILT-UNIV	University	University - Rank 101-200	University - Rank 101-200	University - Rank 101-200	1	0	0	0	0	1	0	0	0	0	0	0	0	0	0	0	0	1	0	0	0	1	0	0	1	Article
51410506	Perspective Piece: The Economic Case for Combating Malaria	AMERICAN JOURNAL OF TROPICAL MEDICINE AND HYGIENE	4	1	Green OA article	Green OA	4	Rublin-D	Rublin	David	Author	1	ACCENTURE-INST-HIGH-PERFORMANCE	ACCENTURE-INST-HIGH-PERFORMANCE	ACCENTURE-INST-HIGH-PERFORMANCE	Company	Company	Company	Company	1	0	0	0	0	1	0	0	1	0	0	0	0	0	0	0	0	0	0	0	0	0	0	0	1	Article
47893040	Perspective on Diagnostics for Global Health	IEEE PULSE	5	2	Green OA article	Green OA	5	McDevitt-JT	McDevitt	John T.	Author	2	RICE-UNIV	RICE-UNIV	RICE-UNIV	University	University - Rank 051-100	University - Rank 51-100	University - Rank 051-100	1	0	0	0	0	1	0	0	0	0	0	0	0	0	0	0	1	0	0	0	0	1	0	0	1	Article
53440347	Perspectives on One Health: a survey of national Delegates to the World Organisation for Animal Health, 2012	REVUE SCIENTIFIQUE ET TECHNIQUE DE L OFFICE INTERNATIONAL DES EPIZOOTIES	2	3	Toll access article	Toll access	2	Brink-N	Brink	N.	Author	3	OFF-PUBL-VET-HLTH-&-CONSUMER-PROTECT	OFF-PUBL-VET-HLTH-&-CONSUMER-PROTECT	OFF-PUBL-VET-HLTH-&-CONSUMER-PROTECT	Government	Government	Government	Government	1	0	0	0	0	0	0	1	0	1	0	0	0	0	0	0	0	0	0	0	0	0	0	0	1	Article
44280721	Perspectives on the Global Threat: The Challenge of Avian Influenza Viruses for the World's Veterinary Community	AVIAN DISEASES	2	2	Toll access article	Toll access	2	Alexander-D	Alexander	Dennis	Author	2	VLA-WEYBRIDGE	VLA-WEYBRIDGE	VLA-WEYBRIDGE	Government	Government	Government	Government	1	0	0	0	0	0	0	1	0	1	0	0	0	0	0	0	0	0	0	0	0	0	0	0	1	Article
53692693	Perspectives on working and training in global health and international emergency medicine	EMERGENCY MEDICINE AUSTRALASIA	6	8	Toll access article	Toll access	6	Jamieson-J	Jamieson	Jennifer	Author, Reprint Author	8	ALFRED-HOSP	ALFRED-HOSP	ALFRED-HOSP	Hospital	University - Rank 051-100	University-Hospital	Hospital	1	0	0	0	0	0	0	1	0	0	1	0	0	0	0	0	0	0	0	0	0	0	0	0	1	Article
53615071	Pertussis A reemerging and an underreported infectious disease	SAUDI MEDICAL JOURNAL	2	2	Gold OA article (APC)	Gold OA	2	Bana-NF	Bana	Noureen F.	Author	2	TRIPLE-A-LIVING-COMMUNITIES-INC	TRIPLE-A-LIVING-COMMUNITIES-INC	TRIPLE-A-LIVING-COMMUNITIES-INC	Company	Company	Company	Company	1	10	0	1	0	0	0	0	1	0	0	0	0	0	0	0	0	0	0	0	0	0	1	0	1	Review
50350480	Pharmaceutical Knowledge Governance: A Human Rights Perspective	JOURNAL OF LAW MEDICINE & ETHICS	1	4	Toll access article	Toll access	1	Lemmens-T	Lemmens	Trudo	Author, Reprint Author	1	UNIV-TORONTO	UNIV-TORONTO	UNIV-TORONTO	University	University - Rank 001-025	University - Rank 001-025	University - Rank 001-025	1	0	0	0	0	0	0	1	0	0	0	0	0	0	1	0	0	0	0	0	0	1	0	1	0	Review
53259927	Pharmaceutical Portfolio Management: Global Disease Burden and Corporate Performance Metrics	VALUE IN HEALTH	5	3	Toll access article	Toll access	5	Thomas-A	Thomas	Adrian	Author	3	JANSSEN-GLOBAL-SERV	JANSSEN-GLOBAL-SERV	JANSSEN-GLOBAL-SERV	Company	Company	Company	Company	1	0	0	0	0	0	0	1	1	0	0	0	0	0	0	0	0	0	0	0	0	0	0	0	1	Article
47238569	Pharmacogenomics: Application to the Management of Cardiovascular Disease	CLINICAL PHARMACOLOGY & THERAPEUTICS	6	9	Green OA article	Green OA	6	Roden-DM	Roden	D. M.	Author	6	VANDERBILT-UNIV	VANDERBILT-UNIV	VANDERBILT-UNIV	University	University - Rank 101-200	University - Rank 101-200	University - Rank 101-200	1	0	0	0	0	1	0	0	0	0	0	0	0	0	0	0	0	1	0	0	0	1	0	0	1	Article
47831063	Physical Inactivity: The "Cinderella" Risk Factor for Noncommunicable Disease Prevention	JOURNAL OF HEALTH COMMUNICATION	2	3	Toll access article	Toll access	2	Bauman-AE	Bauman	Adrian E.	Author	2	UNIV-SYDNEY	UNIV-SYDNEY	UNIV-SYDNEY	University	University - Rank 051-100	University - Rank 51-100	University - Rank 051-100	1	0	0	0	0	0	0	1	0	0	0	0	0	0	0	0	1	0	0	0	0	1	0	0	1	Article
44833672	Placing Emergency Care on the Global Agenda	ANNALS OF EMERGENCY MEDICINE	4	4	Toll access article	Toll access	4	Hirshon-JM	Hirshon	Jon Mark	Author	4	UNIV-MARYLAND	UNIV-MARYLAND	UNIV-MARYLAND	University	University - Rank 051-100	University - Rank 51-100	University - Rank 051-100	1	0	0	0	0	0	0	1	0	0	0	0	0	0	0	0	1	0	0	0	0	1	0	0	1	Article
44431359	Polio Eradication Is Just Over the Horizon: The Challenges of Global Resource Mobilization	JOURNAL OF HEALTH COMMUNICATION	2	2	Toll access article	Toll access	2	Kaufmann-J	Kaufmann	Judith	Author	2	INDEPENDENT-CONSULTANT-DIPLOMACY-GLOBAL-HLTH	INDEPENDENT-CONSULTANT-DIPLOMACY-GLOBAL-HLTH	INDEPENDENT-CONSULTANT-DIPLOMACY-GLOBAL-HLTH	Company	Company	Company	Company	1	0	0	0	0	0	0	1	1	0	0	0	0	0	0	0	0	0	0	0	0	0	0	0	1	Article
44648484	Population dynamics and climate change: what are the links?	JOURNAL OF PUBLIC HEALTH	3	3	Hybrid article	Hybrid	3	Mayhew-S	Mayhew	Susannah	Author	3	UNIV-LONDON-LONDON-SCH-HYG-&-TROP-MED	UNIV-LONDON-LONDON-SCH-HYG-&-TROP-MED	UNIV-LONDON-LONDON-SCH-HYG-&-TROP-MED	University	University - Rank 001-025	University - Rank 001-025	University - Rank 001-025	1	2400	0	0	0	0	1	0	0	0	0	0	0	0	1	0	0	0	0	0	0	1	1	1	0	Article
51437459	Population, development, and climate change: links and effects on human health	LANCET	4	5	Green OA article	Green OA	4	Maslin-M	Maslin	Mark	Author	4	UCL	UCL	UCL	University	University - Rank 001-025	University - Rank 001-025	University - Rank 001-025	1	0	0	0	0	1	0	0	0	0	0	0	0	0	1	0	0	0	0	0	0	1	0	1	0	Review
49819107	Position paper: Improving governance for effective Veterinary Services in developing countries - a priority for donor funding	REVUE SCIENTIFIQUE ET TECHNIQUE DE L OFFICE INTERNATIONAL DES EPIZOOTIES	7	7	Toll access article	Toll access	7	Steinmetz-P	Steinmetz	P.	Author	7	AGENCE-FRANCAISE-DEV	AGENCE-FRANCAISE-DEV	AGENCE-FRANCAISE-DEV	Government	Government	Government	Government	1	0	0	0	0	0	0	1	0	1	0	0	0	0	0	0	0	0	0	0	0	0	0	0	1	Article
50359038	Position statement of the World Heart Federation on the prevention and control of rheumatic heart disease	NATURE REVIEWS CARDIOLOGY	5	4	Toll access article	Toll access	5	Mayosi-BM	Mayosi	Bongani M.	Author	3	GROOTE-SCHUUR-HOSP	GROOTE-SCHUUR-HOSP	GROOTE-SCHUUR-HOSP	Hospital	University - Rank 101-200	University-Hospital	Hospital	1	0	0	0	0	0	0	1	0	0	1	0	0	0	0	0	0	0	0	0	0	0	0	0	1	Review
53587681	Possible Eradication of Wild Poliovirus Type 3-Worldwide, 2012	MMWR-MORBIDITY AND MORTALITY WEEKLY REPORT	8	3	Gold OA article (non-APC)	Gold OA	8	Armstrong-GL	Armstrong	Gregory L.	Author	2	CDC	CDC	CDC	Government	Government	Government	Government	1	0	0	0	1	0	0	0	0	1	0	0	0	0	0	0	0	0	0	0	0	0	0	0	1	Article
47311073	Postgraduate training in global health: ensuring UK doctors can contribute to health in resource-poor countries	CLINICAL MEDICINE	4	3	Toll access article	Toll access	4	Yudkin-JS	Yudkin	John S.	Author	3	UCL	UCL	UCL	University	University - Rank 001-025	University - Rank 001-025	University - Rank 001-025	1	0	0	0	0	0	0	1	0	0	0	0	0	0	1	0	0	0	0	0	0	1	0	1	0	Article
52242724	Postpartum haemorrhage management, risks, and maternal outcomes: findings from the World Health Organization Multicountry Survey on Maternal and Newborn Health	BJOG-AN INTERNATIONAL JOURNAL OF OBSTETRICS AND GYNAECOLOGY	6	3	Hybrid article	Hybrid	6	Winikoff-B	Winikoff	B.	Author	1	GYNU-HLTH-PROJECTS	GYNU-HLTH-PROJECTS	GYNU-HLTH-PROJECTS	Company	Company	Company	Company	1	3000	0	0	0	0	1	0	1	0	0	0	0	0	0	0	0	0	0	0	0	0	1	0	1	Article
50939429	Potential years of life lost (PYLL) caused by asbestos-related diseases in the world	AMERICAN JOURNAL OF INDUSTRIAL MEDICINE	9	8	Toll access article	Toll access	9	Kim-R	Kim	Rokho	Author	8	WHO	WHO	WHO	Non-profit	Non-profit	Non-profit	Non-profit	1	0	0	0	0	0	0	1	0	0	0	1	0	0	0	0	0	0	0	0	0	0	0	0	1	Article
47288736	Poverty, Global Health, and Infectious Disease: Lessons from Haiti and Rwanda	INFECTIOUS DISEASE CLINICS OF NORTH AMERICA	5	2	Green OA article	Green OA	5	Farmer-PE	Farmer	Paul E.	Author	2	HARVARD-UNIV	HARVARD-UNIV	HARVARD-UNIV	University	University - Rank 001-025	University - Rank 001-025	University - Rank 001-025	1	0	0	0	0	1	0	0	0	0	0	0	0	0	1	0	0	0	0	0	0	1	0	1	0	Article
53581503	Pregnancy and venous thromboembolism	CURRENT OPINION IN OBSTETRICS & GYNECOLOGY	3	2	Green OA article	Green OA	3	Caserta-D	Caserta	Donatella	Author	1	UNIV-ROMA-LA-SAPIENZA	UNIV-ROMA-LA-SAPIENZA	UNIV-ROMA-LA-SAPIENZA	University	University - Rank 201-500	University - Rank 201-500	University - Rank 201-500	1	0	0	0	0	1	0	0	0	0	0	0	0	0	0	0	0	0	1	0	0	1	0	0	1	Review
47318104	Preoperative visual acuity among cataract surgery patients and countries' state of development: a global study	BULLETIN OF THE WORLD HEALTH ORGANIZATION	5	2	Gold OA article (non-APC)	Gold OA	5	Lindfield-RJ	Lindfield	Robert J.	Author	1	LONDON-SCH-HYG-&-TROP-MED	UCL	UCL	University	University - Rank 001-025	University - Rank 001-025	University - Rank 001-025	1	0	0	0	1	0	0	0	0	0	0	0	0	0	1	0	0	0	0	0	0	1	0	1	0	Article
46410062	Present epidemiology of tuberculosis. Prevention and control programs	ENFERMEDADES INFECCIOSAS Y MICROBIOLOGIA CLINICA	3	3	Green OA article	Green OA	3	Martinez-JA	Martinez	Jose A.	Author	2	UNIDAD-INVEST-TB-BARCELONA	UNIDAD-INVEST-TB-BARCELONA	UNIDAD-INVEST-TB-BARCELONA	Non-profit	Non-profit	Non-profit	Non-profit	1	0	0	0	0	1	0	0	0	0	0	1	0	0	0	0	0	0	0	0	0	0	0	0	1	Article
52035061	Preterm birth-associated neurodevelopmental impairment estimates at regional and global levels for 2010	PEDIATRIC RESEARCH	13	14	Green OA article	Green OA	13	Lawn-JE	Lawn	Joy E.	Author	13	LONDON-SCH-HYG-&-TROP-MED	UCL	UCL	University	University - Rank 001-025	University - Rank 001-025	University - Rank 001-025	1	0	0	0	0	1	0	0	0	0	0	0	0	0	1	0	0	0	0	0	0	1	0	1	0	Article
52035062	Preterm-associated visual impairment and estimates of retinopathy of prematurity at regional and global levels for 2010	PEDIATRIC RESEARCH	5	6	Green OA article	Green OA	5	Gilbert-C	Gilbert	Clare	Author	6	LONDON-SCH-HYG-&-TROP-MED	UCL	UCL	University	University - Rank 001-025	University - Rank 001-025	University - Rank 001-025	1	0	0	0	0	1	0	0	0	0	0	0	0	0	1	0	0	0	0	0	0	1	0	1	0	Article
53656416	Prevalence of Pain Reporting and Associated Health Outcomes Across Emerging Markets and Developed Countries	PAIN MEDICINE	3	2	Hybrid article	Hybrid	3	DiBonaventura-MD	DiBonaventura	Marco daCosta	Author	1	KANTAR-HLTH	KANTAR-HLTH	KANTAR-HLTH	Company	Company	Company	Company	1	3000	0	0	0	0	1	0	1	0	0	0	0	0	0	0	0	0	0	0	0	0	1	0	1	Article
52746469	Prevalence of ataxia in children A systematic review	NEUROLOGY	7	6	Green OA article	Green OA	7	Bastian-AJ	Bastian	Amy J.	Author	1	JOHNS-HOPKINS-SCH-MED	JOHNS-HOPKINS-UNIV	JOHNS-HOPKINS-UNIV	University	University - Rank 001-025	University - Rank 001-025	University - Rank 001-025	1	0	0	0	0	1	0	0	0	0	0	0	0	0	1	0	0	0	0	0	0	1	0	1	0	Article
48859653	Prevalence of chronic hepatitis B among foreign-born persons living in the United States by country of origin	HEPATOLOGY	5	5	Green OA article	Green OA	5	Brosgart-CL	Brosgart	Carol L.	Author	4	UCSF-SCH-MED	UCSF	UCSF	University	University: Unranked	University: Unranked	University: Unranked	1	0	0	0	0	1	0	0	0	0	0	0	0	0	0	0	0	0	0	0	1	1	0	0	1	Article
51523525	Prevalence of comorbidities in rheumatoid arthritis and evaluation of their monitoring: results of an international, cross-sectional study (COMORA)	ANNALS OF THE RHEUMATIC DISEASES	24	27	Green OA article	Green OA	24	Kay-J	Kay	Jonathan	Author	26	UNIV-MASSACHUSETTS	UNIV-MASSACHUSETTS	UNIV-MASSACHUSETTS	University	University - Rank 101-200	University - Rank 101-200	University - Rank 101-200	1	0	0	0	0	1	0	0	0	0	0	0	0	0	0	0	0	1	0	0	0	1	0	0	1	Article
44834263	Prevalence of headache in Europe: a review for the Eurolight project	JOURNAL OF HEADACHE AND PAIN	2	4	Gold OA article (APC)	Gold OA	2	Andree-C	Andree	Colette	Author	3	CRP-SANTE	CRP-SANTE	CRP-SANTE	Hospital	University - Rank 101-200	University-Hospital	Hospital	1	1965	0	1	0	0	0	0	0	0	1	0	0	0	0	0	0	0	0	0	0	0	1	0	1	Review
46287469	Prevalence of intellectual disability: A meta-analysis of population-based studies	RESEARCH IN DEVELOPMENTAL DISABILITIES	5	4	Green OA article	Green OA	4	Dua-T	Dua	Tarun	Author	4	WHO	WHO	WHO	Non-profit	Non-profit	Non-profit	Non-profit	1	0	0	0	0	1	0	0	0	0	0	1	0	0	0	0	0	0	0	0	0	0	0	0	1	Review
52896921	Prevention and Control of Rabies in an Age of Global Travel: A Review of Travel- and Trade-Associated Rabies Events - United States, 1986-2012	ZOONOSES AND PUBLIC HEALTH	13	9	Toll access article	Toll access	13	Marano-N	Marano	N.	Author	2	CDC	CDC	CDC	Government	Government	Government	Government	1	0	0	0	0	0	0	1	0	1	0	0	0	0	0	0	0	0	0	0	0	0	0	0	1	Review
52694153	Prevention and control of hypertension: developing a global agenda	CURRENT OPINION IN CARDIOLOGY	2	2	Green OA article	Green OA	2	Niebylski-ML	Niebylski	Mark L.	Author	2	WORLD-HYPERTENS-LEAGUE	WORLD-HYPERTENS-LEAGUE	WORLD-HYPERTENS-LEAGUE	Non-profit	Non-profit	Non-profit	Non-profit	1	0	0	0	0	1	0	0	0	0	0	1	0	0	0	0	0	0	0	0	0	0	0	0	1	Review
53447799	Prevention of Alzheimer's Disease: A Global Challenge for Next Generation Neuroscientists	JOURNAL OF ALZHEIMERS DISEASE	5	2	Toll access article	Toll access	5	BoadaRovira-M	Boada-Rovira	Merce	Author	1	FDN-ACE	FDN-ACE	FDN-ACE	Research institute	Research Institute	Research Institute	Research Institute	1	0	0	0	0	0	0	1	0	0	0	0	1	0	0	0	0	0	0	0	0	0	0	0	1	Review
44233764	Primary, secondary and tertiary effects of eco-climatic change: the medical response	POSTGRADUATE MEDICAL JOURNAL	2	1	Green OA article	Green OA	2	Harley-D	Harley	David	Author	1	AUSTRALIAN-NATL-UNIV	AUSTRALIAN-NATL-UNIV	AUSTRALIAN-NATL-UNIV	University	University - Rank 026-050	University - Rank 026-050	University - Rank 026-050	1	0	0	0	0	1	0	0	0	0	0	0	0	0	0	1	0	0	0	0	0	1	0	1	0	Review
45189612	Prioritised research agenda for prevention and control of chronic respiratory diseases	EUROPEAN RESPIRATORY JOURNAL	24	24	Green OA article	Green OA	24	Zhi-L	Zhi	L.	Author	23	CHINESE-MED-ASSOC	CHINESE-MED-ASSOC	CHINESE-MED-ASSOC	Scientific association	Scientific association	Scientific association	Scientific association	1	0	0	0	0	1	0	0	0	0	0	0	0	1	0	0	0	0	0	0	0	0	0	0	1	Article
46577121	Priority actions for the non-communicable disease crisis	LANCET	44	31	Green OA article	Green OA	43	Varghese-C	Varghese	Cherian	Author	7	WHO-WESTERN-PACIFIC-REG-OFF	WHO	WHO	Non-profit	Non-profit	Non-profit	Non-profit	1	0	0	0	0	1	0	0	0	0	0	1	0	0	0	0	0	0	0	0	0	0	0	0	1	Article
46088775	Probiotics, Enteric and Diarrheal Diseases, and Global Health	GASTROENTEROLOGY	6	7	Green OA article	Green OA	6	Versalovic-J	Versalovic	James	Author, Reprint Author	2	BAYLOR-COLL-MED	BAYLOR-COLL-MED	BAYLOR-COLL-MED	University	University: Unranked	University: Unranked	University: Unranked	1	0	0	0	0	1	0	0	0	0	0	0	0	0	0	0	0	0	0	0	1	1	0	0	1	Review
47031556	Progress Toward Control of Rubella and Prevention of Congenital Rubella Syndrome-Worldwide, 2009	JOURNAL OF INFECTIOUS DISEASES	5	2	Hybrid article	Hybrid	5	Cochi-S	Cochi	S.	Author	1	CTR-DIS-CONTROL-&-PREVENT	CDC	CDC	Government	Government	Government	Government	1	3500	0	0	0	0	1	0	0	1	0	0	0	0	0	0	0	0	0	0	0	0	1	0	1	Article
53648621	Progress Toward Global Eradication of Dracunculiasis - January 2013-June 2014	MMWR-MORBIDITY AND MORTALITY WEEKLY REPORT	4	4	Gold OA article (non-APC)	Gold OA	4	Roy-SL	Roy	Sharon L.	Author, Reprint Author	3	CDC	CDC	CDC	Government	Government	Government	Government	1	0	0	0	1	0	0	0	0	1	0	0	0	0	0	0	0	0	0	0	0	0	0	0	1	Article
52662265	Progress Toward Polio Eradication - Worldwide, 2013-2014	MMWR-MORBIDITY AND MORTALITY WEEKLY REPORT	7	4	Gold OA article (non-APC)	Gold OA	7	Jafari-H	Jafari	Hamid	Author	3	WHO	WHO	WHO	Non-profit	Non-profit	Non-profit	Non-profit	1	0	0	0	1	0	0	0	0	0	0	1	0	0	0	0	0	0	0	0	0	0	0	0	1	Article
53587682	Progress Toward Regional Measles Elimination -Worldwide, 2000-2013	MMWR-MORBIDITY AND MORTALITY WEEKLY REPORT	8	3	Gold OA article (non-APC)	Gold OA	8	Goodson-JL	Goodson	James L.	Author, Reprint Author	3	CDC	CDC	CDC	Government	Government	Government	Government	1	0	0	0	1	0	0	0	0	1	0	0	0	0	0	0	0	0	0	0	0	0	0	0	1	Article
51557465	Progress in Global Surveillance and Response Capacity 10 Years after Severe Acute Respiratory Syndrome	EMERGING INFECTIOUS DISEASES	4	3	Gold OA article (non-APC)	Gold OA	4	Hughes-JM	Hughes	James M.	Author, Reprint Author	3	EMORY-UNIV	EMORY-UNIV	EMORY-UNIV	University	University - Rank 051-100	University - Rank 51-100	University - Rank 051-100	1	0	0	0	1	0	0	0	0	0	0	0	0	0	0	0	1	0	0	0	0	1	0	0	1	Article
49678137	Progress on noise policies from 2008 to 2011	NOISE & HEALTH	3	3	Gold OA article (non-APC)	Gold OA	3	Lambert-J	Lambert	Jacques	Author	3	IFSTTAR-TRANSPORT-&-ENVIRONM-LAB	IFSTTAR-TRANSPORT-&-ENVIRONM-LAB	IFSTTAR-TRANSPORT-&-ENVIRONM-LAB	Research institute	Research Institute	Research Institute	Research Institute	1	0	0	0	1	0	0	0	0	0	0	0	1	0	0	0	0	0	0	0	0	0	0	0	1	Article
49658247	Progress toward Global Reduction in Under-Five Mortality: A Bootstrap Analysis of Uncertainty in Millennium Development Goal 4 Estimates	PLOS MEDICINE	2	2	Gold OA article (APC)	Gold OA	2	New-JR	New	Jin Rou	Author	1	NATL-UNIV-SINGAPORE	NATL-UNIV-SINGAPORE	NATL-UNIV-SINGAPORE	University	University - Rank 001-025	University - Rank 001-025	University - Rank 001-025	1	2900	0	1	0	0	0	0	0	0	0	0	0	0	1	0	0	0	0	0	0	1	1	1	0	Article
47304735	Progress towards Millennium Development Goals 4 and 5 on maternal and child mortality: an updated systematic analysis	LANCET	12	2	Toll access article	Toll access	12	Murray-CJL	Murray	Christopher J. L.	Author	1	UNIV-WASHINGTON	UNIV-WASHINGTON	UNIV-WASHINGTON	University	University - Rank 026-050	University - Rank 026-050	University - Rank 026-050	1	0	0	0	0	0	0	1	0	0	0	0	0	0	0	1	0	0	0	0	0	1	0	1	0	Article
48879425	Progress, Challenges, and New Opportunities for the Prevention of Mother-to-Child Transmission of HIV Under the US President's Emergency Plan for AIDS Relief	JAIDS-JOURNAL OF ACQUIRED IMMUNE DEFICIENCY SYNDROMES	12	11	Green OA article	Green OA	12	Stringer-JSA	Stringer	Jeffrey S. A.	Author	1	CTR-INFECT-DIS-RES-ZAMBIA	CTR-INFECT-DIS-RES-ZAMBIA	CTR-INFECT-DIS-RES-ZAMBIA	Research institute	Research Institute	Research Institute	Research Institute	1	0	0	0	0	1	0	0	0	0	0	0	1	0	0	0	0	0	0	0	0	0	0	0	1	Article
46927818	Projections of global health outcomes from 2005 to 2060 using the International Futures integrated forecasting model	BULLETIN OF THE WORLD HEALTH ORGANIZATION	7	2	Gold OA article (non-APC)	Gold OA	7	Dickson-JR	Dickson	Janet R.	Author	1	UNIV-DENVER	UNIV-DENVER	UNIV-DENVER	University	University - Rank 201-500	University - Rank 201-500	University - Rank 201-500	1	0	0	0	1	0	0	0	0	0	0	0	0	0	0	0	0	0	1	0	0	1	0	0	1	Article
46534866	Promoting Global Cardiovascular Health Moving Forward	CIRCULATION	3	3	Hybrid article	Hybrid	3	Vedanthan-R	Vedanthan	Rajesh	Author	1	MT-SINAI-MED-CTR	MT-SINAI-MED-CTR	MT-SINAI-MED-CTR	Hospital	University - Rank 026-050	University-Hospital	Hospital	1	4600	0	0	0	0	1	0	0	0	1	0	0	0	0	0	0	0	0	0	0	0	1	0	1	Article
49627663	Promoting Global Cardiovascular and Cerebrovascular Health	MOUNT SINAI JOURNAL OF MEDICINE	3	3	Toll access article	Toll access	3	Kelly-BB	Kelly	Bridget B.	Author, Reprint Author	1	NATL-ACAD	NATL-ACAD	NATL-ACAD	Scientific association	Scientific association	Scientific association	Scientific association	1	0	0	0	0	0	0	1	0	0	0	0	0	1	0	0	0	0	0	0	0	0	0	0	1	Article
46679731	Promoting Global Population Health While Constraining the Environmental Footprint	Annual Review of Public Health	2	1	Green OA article	Green OA	2	Butler-CD	Butler	C. D.	Author	1	AUSTRALIAN-NATL-UNIV	AUSTRALIAN-NATL-UNIV	AUSTRALIAN-NATL-UNIV	University	University - Rank 026-050	University - Rank 026-050	University - Rank 026-050	1	0	0	0	0	1	0	0	0	0	0	0	0	0	0	1	0	0	0	0	0	1	0	1	0	Review
50156492	Promoting Volunteerism in Global Health: Lessons from a Medical Mission in Northern Mexico	JOURNAL OF COMMUNITY HEALTH	3	4	Toll access article	Toll access	3	Aghaloo-T	Aghaloo	Tara	Author	1	UNIV-CALIF-LOS-ANGELES	UCLA	UCLA	University	University - Rank 001-025	University - Rank 001-025	University - Rank 001-025	1	0	0	0	0	0	0	1	0	0	0	0	0	0	1	0	0	0	0	0	0	1	0	1	0	Article
49930702	Promoting change through political consciousness: A South African speech-language pathology response to the World Report on Disability	INTERNATIONAL JOURNAL OF SPEECH-LANGUAGE PATHOLOGY	2	2	Green OA article	Green OA	2	Pillay-M	Pillay	Mershen	Author	2	UNIV-STELLENBOSCH	UNIV-STELLENBOSCH	UNIV-STELLENBOSCH	University	University - Rank 201-500	University - Rank 201-500	University - Rank 201-500	1	0	0	0	0	1	0	0	0	0	0	0	0	0	0	0	0	0	1	0	0	1	0	0	1	Article
49619745	Promoting global health: utilizing WHO to integrate public health, innovation and intellectual property	DRUG DISCOVERY TODAY	2	4	Toll access article	Toll access	2	Liang-BA	Liang	Bryan A.	Author	1	CALIF-WESTERN-SCH-LAW	CALIF-WESTERN-SCH-LAW	CALIF-WESTERN-SCH-LAW	University	University: Unranked	University: Unranked	University: Unranked	1	0	0	0	0	0	0	1	0	0	0	0	0	0	0	0	0	0	0	0	1	1	0	0	1	Review
52520661	Promoting medical students' reflection on competencies to advance a global health equities curriculum	BMC MEDICAL EDUCATION	9	6	Gold OA article (APC)	Gold OA	9	Williams-B	Williams	Brent	Author	3	UNIV-MICHIGAN	UNIV-MICHIGAN	UNIV-MICHIGAN	University	University - Rank 001-025	University - Rank 001-025	University - Rank 001-025	1	2145	0	1	0	0	0	0	0	0	0	0	0	0	1	0	0	0	0	0	0	1	1	1	0	Article
50843053	Prospects for Tuberculosis Elimination	Annual Review of Public Health	4	2	Toll access article	Toll access	4	Raviglione-M	Raviglione	Mario	Author	2	WHO	WHO	WHO	Non-profit	Non-profit	Non-profit	Non-profit	1	0	0	0	0	0	0	1	0	0	0	1	0	0	0	0	0	0	0	0	0	0	0	0	1	Review
50275324	Protection, Promotion, and Support and Global Trends in Breastfeeding	ADVANCES IN NUTRITION	2	2	Green OA article	Green OA	2	Morrow-AL	Morrow	Ardythe L.	Author	2	CINCINNATI-CHILDRENS-HOSP-MED-CTR	CINCINNATI-CHILDRENS-HOSP	CINCINNATI-CHILDRENS-HOSP	Hospital	University - Rank 201-500	University-Hospital	Hospital	1	0	0	0	0	1	0	0	0	0	1	0	0	0	0	0	0	0	0	0	0	0	0	0	1	Article
49291621	Psychopathic Traits in Females and Males across the Globe	BEHAVIORAL SCIENCES & THE LAW	5	2	Toll access article	Toll access	3	Carter-R	Carter	Rachel	Author	1	UNIV-N-TEXAS	UNIV-N-TEXAS	UNIV-N-TEXAS	University	University: Unranked	University: Unranked	University: Unranked	1	0	0	0	0	0	0	1	0	0	0	0	0	0	0	0	0	0	0	0	1	1	0	0	1	Article
43997183	Public Awareness and Knowledge of Herpes Zoster: Results of a Global Survey	GERONTOLOGY	2	3	Toll access article	Toll access	1	Paek-E	Paek	Esther	Author, Reprint Author	1	MERCK-&-CO-INC	MERCK-&-CO-INC	MERCK-&-CO-INC	Company	Company	Company	Company	1	0	0	0	0	0	0	1	1	0	0	0	0	0	0	0	0	0	0	0	0	0	0	0	1	Article
48545400	Public Health, Global Surveillance, and the "Emerging Disease" Worldview: A Postcolonial Appraisal of PEPFAR	HEALTH COMMUNICATION	2	1	Green OA article	Green OA	2	Dutta-MJ	Dutta	Mohan J.	Author	1	PURDUE-UNIV	PURDUE-UNIV	PURDUE-UNIV	University	University - Rank 051-100	University - Rank 51-100	University - Rank 051-100	1	0	0	0	0	1	0	0	0	0	0	0	0	0	0	0	1	0	0	0	0	1	0	0	1	Article
51888822	Public health lives: Gro Harlem Brundtland	PUBLIC HEALTH	2	2	Toll access article	Toll access	2	vonSchirnding-Y	von Schirnding	Y.	Author	2	MT-SINAI-SCH-MED	MT-SINAI-MED-CTR	MT-SINAI-MED-CTR	Hospital	University - Rank 026-050	University-Hospital	Hospital	1	0	0	0	0	0	0	1	0	0	1	0	0	0	0	0	0	0	0	0	0	0	0	0	1	Review
53379041	Quality of diabetes care worldwide and feasibility of implementation of the Alphabet Strategy: GAIA project (Global Alphabet Strategy Implementation Audit)	BMC HEALTH SERVICES RESEARCH	5	3	Gold OA article (APC)	Gold OA	5	Patel-V	Patel	Vinod	Author	1	GEORGE-ELIOT-HOSP-NHS-TRUST	GEORGE-ELIOT-HOSP-NHS-TRUST	GEORGE-ELIOT-HOSP-NHS-TRUST	Hospital	University - Rank 051-100	University-Hospital	Hospital	1	2145	0	1	0	0	0	0	0	0	1	0	0	0	0	0	0	0	0	0	0	0	1	0	1	Article
51596859	Quantitative and qualitative differences in use and trends of hematopoietic stem cell transplantation: a Global Observational Study	HAEMATOLOGICA	15	11	Gold OA article (APC)	Gold OA	15	Niederwieser-D	Niederwieser	Dietger	Author	11	UNIV-HOSP	UNIV-HOSP-LEIPZIG	UNIV-HOSP-LEIPZIG	Hospital	University: Unranked	University-Hospital	Hospital	1	1829.7	0	1	0	0	0	0	0	0	1	0	0	0	0	0	0	0	0	0	0	0	1	0	1	Article
50654006	Quinidine, A Life-Saving Medication for Brugada Syndrome, Is Inaccessible in Many Countries	JOURNAL OF THE AMERICAN COLLEGE OF CARDIOLOGY	14	9	Hybrid article	Hybrid	14	Rosso-R	Rosso	Raphael	Author	1	TEL-AVIV-UNIV	TEL-AVIV-UNIV	TEL-AVIV-UNIV	University	University - Rank 201-500	University - Rank 201-500	University - Rank 201-500	1	3000	0	0	0	0	1	0	0	0	0	0	0	0	0	0	0	0	1	0	0	1	1	0	1	Article
53249178	REGULATORY UNDERPINNINGS OF GLOBAL HEALTH SECURITY: FDA'S ROLES IN PREVENTING, DETECTING, AND RESPONDING TO GLOBAL HEALTH THREATS	BIOSECURITY AND BIOTERRORISM-BIODEFENSE STRATEGY PRACTICE AND SCIENCE	3	2	Green OA article	Green OA	3	Maher-C	Maher	Carmen	Author	1	US-FDA	US-FDA	US-FDA	Government	Government	Government	Government	1	0	0	0	0	1	0	0	0	1	0	0	0	0	0	0	0	0	0	0	0	0	0	0	1	Article
51011358	Raising awareness of acute kidney injury: a global perspective of a silent killer	KIDNEY INTERNATIONAL	3	3	Green OA article	Green OA	3	Mehta-RL	Mehta	Ravindra L.	Author, Reprint Author	3	UNIV-CALIF-SAN-DIEGO	UNIV-CALIF-SAN-DIEGO	UNIV-CALIF-SAN-DIEGO	University	University - Rank 026-050	University - Rank 026-050	University - Rank 026-050	1	0	0	0	0	1	0	0	0	0	0	0	0	0	0	1	0	0	0	0	0	1	0	1	0	Review
48879435	Raising the Bar: PEPFAR and New Paradigms for Global Health	JAIDS-JOURNAL OF ACQUIRED IMMUNE DEFICIENCY SYNDROMES	5	1	Green OA article	Green OA	5	Walsh-T	Walsh	Thomas	Author	1	US-DEPT-STATE	US-DEPT-STATE	US-DEPT-STATE	Government	Government	Government	Government	1	0	0	0	0	1	0	0	0	1	0	0	0	0	0	0	0	0	0	0	0	0	0	0	1	Article
47062791	Raising the Profile of Participatory Action Research at the 2010 Global Symposium on Health Systems Research	MEDICC REVIEW	8	6	Gold OA article (non-APC)	Gold OA	8	Kakde-D	Kakde	Dhananjay	Author	3	SUPPORT-ADVOCACY-&-TRAINING-HLTH-INITIAT	SUPPORT-ADVOCACY-&-TRAINING-HLTH-INITIAT	SUPPORT-ADVOCACY-&-TRAINING-HLTH-INITIAT	Non-profit	Non-profit	Non-profit	Non-profit	1	0	0	0	1	0	0	0	0	0	0	1	0	0	0	0	0	0	0	0	0	0	0	0	1	Article
52007140	Rapidly Building Global Health Security Capacity - Uganda Demonstration Project, 2013	MMWR-MORBIDITY AND MORTALITY WEEKLY REPORT	23	9	Gold OA article (non-APC)	Gold OA	23	Wuhib-T	Wuhib	Tadesse	Author	3	CDC	CDC	CDC	Government	Government	Government	Government	1	0	0	0	1	0	0	0	0	1	0	0	0	0	0	0	0	0	0	0	0	0	0	0	1	Article
46953291	Rationale for the use of immunomodulatory therapies in the Global Initiative for Asthma (GINA) step V asthma other than oral glucocorticosteroids	INTERNAL MEDICINE JOURNAL	3	3	Toll access article	Toll access	3	Mirapeix-R	Mirapeix	R.	Author	3	UNIV-AUTONOMA-BARCELONA	AUTONOMOUS-UNIV-BARCELONA	AUTONOMOUS-UNIV-BARCELONA	University	University - Rank 101-200	University - Rank 101-200	University - Rank 101-200	1	0	0	0	0	0	0	1	0	0	0	0	0	0	0	0	0	1	0	0	0	1	0	0	1	Article
49165082	Rebalancing brain drain: Exploring resource reallocation to address health worker migration and promote global health	HEALTH POLICY	2	4	Toll access article	Toll access	2	Liang-BA	Liang	Bryan Albert	Author	1	CALIF-WESTERN-SCH-LAW	CALIF-WESTERN-SCH-LAW	CALIF-WESTERN-SCH-LAW	University	University: Unranked	University: Unranked	University: Unranked	1	0	0	0	0	0	0	1	0	0	0	0	0	0	0	0	0	0	0	0	1	1	0	0	1	Article
46747621	Recent perspectives on the global epidemiology of childhood eczema	ALLERGOLOGIA ET IMMUNOPATHOLOGIA	1	2	Toll access article	Toll access	1	Flohr-C	Flohr	C.	Author, Reprint Author	1	ST-THOMAS-HOSP	ST-THOMAS-HOSP	ST-THOMAS-HOSP	Hospital	Hospital	Hospital	Hospital	1	0	0	0	0	0	0	1	0	0	1	0	0	0	0	0	0	0	0	0	0	0	0	0	1	Review
53581500	Recent progress in understanding the epidemiology of bacterial vaginosis	CURRENT OPINION IN OBSTETRICS & GYNECOLOGY	2	2	Green OA article	Green OA	2	Osbak-K	Osbak	Kara	Author	1	INST-TROP-MED	INST-TROP-MED	INST-TROP-MED	Research institute	Research Institute	Research Institute	Research Institute	1	0	0	0	0	1	0	0	0	0	0	0	1	0	0	0	0	0	0	0	0	0	0	0	1	Review
51386630	Recent randomized controlled trials of psychological interventions in healthcare: A review of their quantity, scope, and characteristics	JOURNAL OF PSYCHOSOMATIC RESEARCH	4	4	Toll access article	Toll access	4	Jonsson-U	Jonsson	Ulf	Author	3	SWEDISH-COUNCIL-HLTH-TECHNOL-ASSESSMENT	SWEDISH-COUNCIL-HLTH-TECHNOL-ASSESSMENT	SWEDISH-COUNCIL-HLTH-TECHNOL-ASSESSMENT	Non-profit	Non-profit	Non-profit	Non-profit	1	0	0	0	0	0	0	1	0	0	0	1	0	0	0	0	0	0	0	0	0	0	0	0	1	Review
46319551	Recent worldwide sleep patterns and problems during adolescence: A review and meta-analysis of age, region, and sleep	SLEEP MEDICINE	3	1	Toll access article	Toll access	3	Dohnt-H	Dohnt	Hayley	Author	1	FLINDERS-UNIV-S-AUSTRALIA	FLINDERS-UNIV-S-AUSTRALIA	FLINDERS-UNIV-S-AUSTRALIA	University	University - Rank 201-500	University - Rank 201-500	University - Rank 201-500	1	0	0	0	0	0	0	1	0	0	0	0	0	0	0	0	0	0	1	0	0	1	0	0	1	Review
49627664	Recognizing Global Burden of Cardiovascular Disease and Related Chronic Diseases	MOUNT SINAI JOURNAL OF MEDICINE	3	3	Toll access article	Toll access	3	Fuster-V	Fuster	Valentin	Author	2	MT-SINAI-MED-CTR	MT-SINAI-MED-CTR	MT-SINAI-MED-CTR	Hospital	University - Rank 026-050	University-Hospital	Hospital	1	0	0	0	0	0	0	1	0	0	1	0	0	0	0	0	0	0	0	0	0	0	0	0	1	Article
52971720	Recruiting Post-Doctoral Fellows into Global Health Research: Selecting NIH Fogarty International Clinical Research Fellows	AMERICAN JOURNAL OF TROPICAL MEDICINE AND HYGIENE	8	9	Green OA article	Green OA	8	Vermund-SH	Vermund	Sten H.	Author	1	VANDERBILT-UNIV	VANDERBILT-UNIV	VANDERBILT-UNIV	University	University - Rank 101-200	University - Rank 101-200	University - Rank 101-200	1	0	0	0	0	1	0	0	0	0	0	0	0	0	0	0	0	1	0	0	0	1	0	0	1	Article
50537234	Recurrence of adverse perinatal outcomes in developing countries	BULLETIN OF THE WORLD HEALTH ORGANIZATION	6	4	Gold OA article (non-APC)	Gold OA	6	Merialdi-M	Merialdi	Mario	Author	3	WORLD-HLTH-ORG	WHO	WHO	Non-profit	Non-profit	Non-profit	Non-profit	1	0	0	0	1	0	0	0	0	0	0	1	0	0	0	0	0	0	0	0	0	0	0	0	1	Article
51149203	Redefining global health-care delivery	LANCET	3	3	Green OA article	Green OA	3	Porter-ME	Porter	Michael E.	Author	3	HARVARD-UNIV	HARVARD-UNIV	HARVARD-UNIV	University	University - Rank 001-025	University - Rank 001-025	University - Rank 001-025	1	0	0	0	0	1	0	0	0	0	0	0	0	0	1	0	0	0	0	0	0	1	0	1	0	Article
44220547	Reducing Population Salt Intake Worldwide: From Evidence to Implementation	PROGRESS IN CARDIOVASCULAR DISEASES	2	1	Green OA article	Green OA	2	MacGregor-GA	MacGregor	Graham A.	Author	1	QUEEN-MARY-UNIV-LONDON	QUEEN-MARY-UNIV-LONDON	QUEEN-MARY-UNIV-LONDON	University	University - Rank 101-200	University - Rank 101-200	University - Rank 101-200	1	0	0	0	0	1	0	0	0	0	0	0	0	0	0	0	0	1	0	0	0	1	0	0	1	Review
47469050	Reducing global health inequalities. Part 2: Myriad challenges	JOURNAL OF THE ROYAL SOCIETY OF MEDICINE	2	2	Green OA article	Green OA	2	Soulsby-EJL	Soulsby	E. J. L.	Author	2	UNIV-CAMBRIDGE	UNIV-CAMBRIDGE	UNIV-CAMBRIDGE	University	University - Rank 001-025	University - Rank 001-025	University - Rank 001-025	1	0	0	0	0	1	0	0	0	0	0	0	0	0	1	0	0	0	0	0	0	1	0	1	0	Article
49241348	Reducing maternal, newborn, and infant mortality globally: An integrated action agenda	INTERNATIONAL JOURNAL OF GYNECOLOGY & OBSTETRICS	4	1	Toll access article	Toll access	4	Keenan-WJ	Keenan	William J.	Author	1	INT-PEDIAT-ASSOC	INT-PEDIAT-ASSOC	INT-PEDIAT-ASSOC	Non-profit	Non-profit	Non-profit	Non-profit	1	0	0	0	0	0	0	1	0	0	0	1	0	0	0	0	0	0	0	0	0	0	0	0	1	Article
47831067	Reducing the Silent Burden of Impaired Mental Health	JOURNAL OF HEALTH COMMUNICATION	8	8	Toll access article	Toll access	8	Litchfield-P	Litchfield	Paul	Author	8	BRITISH-TELECOMMUN-PLC	BRITISH-TELECOMMUN-PLC	BRITISH-TELECOMMUN-PLC	Company	Company	Company	Company	1	0	0	0	0	0	0	1	1	0	0	0	0	0	0	0	0	0	0	0	0	0	0	0	1	Article
50628917	Reflections on the Maternal Mortality Millennium Goal	BIRTH-ISSUES IN PERINATAL CARE	2	2	Toll access article	Toll access	2	Keirse-MJNC	Keirse	Marc J. N. C.	Author	2	FLINDERS-UNIV-S-AUSTRALIA	FLINDERS-UNIV-S-AUSTRALIA	FLINDERS-UNIV-S-AUSTRALIA	University	University - Rank 201-500	University - Rank 201-500	University - Rank 201-500	1	0	0	0	0	0	0	1	0	0	0	0	0	0	0	0	0	0	1	0	0	1	0	0	1	Article
48827414	Regional differences in treatment response and three year course of schizophrenia across the world	JOURNAL OF PSYCHIATRIC RESEARCH	9	8	Toll access article	Toll access	9	Alvarez-E	Alvarez	Enric	Author	8	AUTONOMOUS-UNIV-BARCELONA	AUTONOMOUS-UNIV-BARCELONA	AUTONOMOUS-UNIV-BARCELONA	University	University - Rank 101-200	University - Rank 101-200	University - Rank 101-200	1	0	0	0	0	0	0	1	0	0	0	0	0	0	0	0	0	1	0	0	0	1	0	0	1	Article
52427269	Regional variation in the allocation of development assistance for health	GLOBALIZATION AND HEALTH	7	2	Gold OA article (APC)	Gold OA	7	Dieleman-JL	Dieleman	Joseph L.	Author	1	UNIV-WASHINGTON	UNIV-WASHINGTON	UNIV-WASHINGTON	University	University - Rank 026-050	University - Rank 026-050	University - Rank 026-050	1	2145	0	1	0	0	0	0	0	0	0	0	0	0	0	1	0	0	0	0	0	1	1	1	0	Article
51286770	Relationship of Lipoproteins to Cardiovascular Events The AIM-HIGH Trial (Atherothrombosis Intervention in Metabolic Syndrome With Low HDL/High Triglycerides and Impact on Global Health Outcomes)	JOURNAL OF THE AMERICAN COLLEGE OF CARDIOLOGY	13	11	Green OA article	Green OA	13	Boden-WE	Boden	William E.	Author	11	SAMUEL-S-STRATTON-VA-MED-CTR	SAMUEL-S-STRATTON-VA-MED-CTR	SAMUEL-S-STRATTON-VA-MED-CTR	Hospital	Hospital	Hospital	Hospital	1	0	0	0	0	1	0	0	0	0	1	0	0	0	0	0	0	0	0	0	0	0	0	0	1	Article
49156666	Relevance of Latent TB Infection in Areas of High TB Prevalence	CHEST	3	2	Toll access article	Toll access	3	Sharma-A	Sharma	Abhishek	Author	1	ALL-INDIA-INST-MED-SCI	ALL-INDIA-INST-MED-SCI	ALL-INDIA-INST-MED-SCI	University	University: Unranked	University: Unranked	University: Unranked	1	0	0	0	0	0	0	1	0	0	0	0	0	0	0	0	0	0	0	0	1	1	0	0	1	Article
53570833	Remembering the forgotten non-communicable diseases	BMC MEDICINE	10	19	Gold OA article (APC)	Gold OA	10	Ferri-CP	Ferri	Cleusa P.	Author	18	HOSP-ALEMAO-OSWALDO-CRUZ	HOSP-ALEMAO-OSWALDO-CRUZ	HOSP-ALEMAO-OSWALDO-CRUZ	Hospital	Hospital	Hospital	Hospital	1	2785	0	1	0	0	0	0	0	0	1	0	0	0	0	0	0	0	0	0	0	0	1	0	1	Article
52640858	Reporting of context and implementation in studies of global health interventions: a pilot study	IMPLEMENTATION SCIENCE	5	2	Gold OA article (APC)	Gold OA	5	Perry-T	Perry	Tanja	Author	1	RAND-CORP	RAND-CORP	RAND-CORP	Company	Company	Company	Company	1	2365	0	1	0	0	0	0	1	0	0	0	0	0	0	0	0	0	0	0	0	0	1	0	1	Article
51599033	Research Priorities for Data Collection and Management Within Global Acute and Emergency Care Systems	ACADEMIC EMERGENCY MEDICINE	8	9	Hybrid article	Hybrid	8	Mowafi-H	Mowafi	Hani	Author	9	YALE-UNIV	YALE-UNIV	YALE-UNIV	University	University - Rank 001-025	University - Rank 001-025	University - Rank 001-025	1	3000	0	0	0	0	1	0	0	0	0	0	0	0	1	0	0	0	0	0	0	1	1	1	0	Article
51885488	Research Review: Epidemiological modelling of attention-deficit/hyperactivity disorder and conduct disorder for the Global Burden of Disease Study 2010	JOURNAL OF CHILD PSYCHOLOGY AND PSYCHIATRY AND ALLIED DISCIPLINES	8	9	Toll access article	Toll access	8	Scott-JG	Scott	James G.	Author	2	PK-CTR-MENTAL-HLTH	PK-CTR-MENTAL-HLTH	PK-CTR-MENTAL-HLTH	Hospital	Hospital	Hospital	Hospital	1	0	0	0	0	0	0	1	0	0	1	0	0	0	0	0	0	0	0	0	0	0	0	0	1	Review
53949674	Research ethics in global mental health: Advancing culturally responsive mental health research	TRANSCULTURAL PSYCHIATRY	1	3	Toll access article	Toll access	1	RuizCasares-M	Ruiz-Casares	Monica	Author, Reprint Author	1	MCGILL-UNIV	MCGILL-UNIV	MCGILL-UNIV	University	University - Rank 026-050	University - Rank 026-050	University - Rank 026-050	1	0	0	0	0	0	0	1	0	0	0	0	0	0	0	1	0	0	0	0	0	1	0	1	0	Article
46618472	Research in global health and North-South partnership challenges	CANADIAN JOURNAL OF PUBLIC HEALTH-REVUE CANADIENNE DE SANTE PUBLIQUE	2	2	Green OA article	Green OA	1	Ridde-V	Ridde	Valery	Author, Reprint Author	1	CHUM	UNIV-MONTREAL	UNIV-MONTREAL-HOSP	Hospital	University - Rank 101-200	University-Hospital	Hospital	1	0	0	0	0	1	0	0	0	0	1	0	0	0	0	0	0	0	0	0	0	0	0	0	1	Article
48604958	Resource Availability, Mortality, and Fertility: A Path Analytic Approach to Global Life-History Variation	HUMAN BIOLOGY	2	1	Green OA article	Green OA	2	Quinlan-RJ	Quinlan	Robert J.	Author	1	WASHINGTON-STATE-UNIV	WASHINGTON-STATE-UNIV	WASHINGTON-STATE-UNIV	University	University - Rank 201-500	University - Rank 201-500	University - Rank 201-500	1	0	0	0	0	1	0	0	0	0	0	0	0	0	0	0	0	0	1	0	0	1	0	0	1	Article
52148238	Resource Planning for Neglected Tropical Disease (NTD) Control Programs: Feasibility Study of the Tool for Integrated Planning and Costing (TIPAC)	PLOS NEGLECTED TROPICAL DISEASES	22	14	Gold OA article (APC)	Gold OA	22	Yajima-A	Yajima	Aya	Author	14	WORLD-HLTH-ORG	WHO	WHO	Non-profit	Non-profit	Non-profit	Non-profit	1	2250	0	1	0	0	0	0	0	0	0	1	0	0	0	0	0	0	0	0	0	0	1	0	1	Article
49930699	Responding to the World Report on Disability in Australia: Lessons from collaboration in an urban Aboriginal and Torres Strait Islander school	INTERNATIONAL JOURNAL OF SPEECH-LANGUAGE PATHOLOGY	3	3	Green OA article	Green OA	3	Nelson-A	Nelson	Alison	Author	2	UNIV-QUEENSLAND	UNIV-QUEENSLAND	UNIV-QUEENSLAND	University	University - Rank 051-100	University - Rank 51-100	University - Rank 051-100	1	0	0	0	0	1	0	0	0	0	0	0	0	0	0	0	1	0	0	0	0	1	0	0	1	Article
50583764	Response to the AIDS Pandemic - A Global Health Model	NEW ENGLAND JOURNAL OF MEDICINE	2	2	Green OA article	Green OA	2	Quinn-TC	Quinn	Thomas C.	Author	2	NIAID	NIAID	NIAID	Government	Government	Government	Government	1	0	0	0	0	1	0	0	0	1	0	0	0	0	0	0	0	0	0	0	0	0	0	0	1	Review
49932332	Restructuring brain drain: strengthening governance and financing for health worker migration	GLOBAL HEALTH ACTION	2	4	Gold OA article (APC)	Gold OA	2	Liang-BA	Liang	Bryan A.	Author	2	UNIV-CALIF-SAN-DIEGO	UNIV-CALIF-SAN-DIEGO	UNIV-CALIF-SAN-DIEGO	University	University - Rank 026-050	University - Rank 026-050	University - Rank 026-050	1	1500	0	1	0	0	0	0	0	0	0	0	0	0	0	1	0	0	0	0	0	1	1	1	0	Article
51044114	Rethinking health research capacity strengthening	GLOBAL PUBLIC HEALTH	4	3	Green OA article	Green OA	4	Parker-RG	Parker	Richard G.	Author	1	COLUMBIA-UNIV	COLUMBIA-UNIV	COLUMBIA-UNIV	University	University - Rank 001-025	University - Rank 001-025	University - Rank 001-025	1	0	0	0	0	1	0	0	0	0	0	0	0	0	1	0	0	0	0	0	0	1	0	1	0	Article
51311334	Review Article: Plague Gives Surprises in the First Decade of the 21st Century in the United States and Worldwide	AMERICAN JOURNAL OF TROPICAL MEDICINE AND HYGIENE	1	1	Green OA article	Green OA	1	Butler-T	Butler	Thomas	Author, Reprint Author	1	ROSS-UNIV	ROSS-UNIV	ROSS-UNIV	University	University: Unranked	University: Unranked	University: Unranked	1	0	0	0	0	1	0	0	0	0	0	0	0	0	0	0	0	0	0	0	1	1	0	0	1	Review
51391800	Review on the worldwide epidemiology of uveitis	EUROPEAN JOURNAL OF OPHTHALMOLOGY	4	1	Toll access article	Toll access	4	Bandello-F	Bandello	Francesco	Author	1	UNIV-VITA-SALUTE-SAN-RAFFAELE	UNIV-VITA-SALUTE-SAN-RAFFAELE	UNIV-VITA-SALUTE-SAN-RAFFAELE	University	University: Unranked	University: Unranked	University: Unranked	1	0	0	0	0	0	0	1	0	0	0	0	0	0	0	0	0	0	0	0	1	1	0	0	1	Review
48777314	Revising and refining the epilepsy classification system: Priorities from a developing world perspective	EPILEPSIA	1	2	Green OA article	Green OA	1	Birbeck-GL	Birbeck	Gretchen L.	Author, Reprint Author	1	MICHIGAN-STATE-UNIV	MICHIGAN-STATE-UNIV	MICHIGAN-STATE-UNIV	University	University - Rank 101-200	University - Rank 101-200	University - Rank 101-200	1	0	0	0	0	1	0	0	0	0	0	0	0	0	0	0	0	1	0	0	0	1	0	0	1	Article
46230003	Right to Health Litigation and HIV/AIDS Policy	JOURNAL OF LAW MEDICINE & ETHICS	2	4	Green OA article	Green OA	2	Yamin-AE	Yamin	Alicia Ely	Author	2	HARVARD-UNIV	HARVARD-UNIV	HARVARD-UNIV	University	University - Rank 001-025	University - Rank 001-025	University - Rank 001-025	1	0	0	0	0	1	0	0	0	0	0	0	0	0	1	0	0	0	0	0	0	1	0	1	0	Article
50055907	Road Traffic Injuries: Social Change and Development	MEDICAL HISTORY	1	2	Green OA article	Green OA	1	Borowy-I	Borowy	Iris	Author, Reprint Author	1	UNIV-ROSTOCK	UNIV-ROSTOCK	UNIV-ROSTOCK	University	University: Unranked	University: Unranked	University: Unranked	1	0	0	0	0	1	0	0	0	0	0	0	0	0	0	0	0	0	0	0	1	1	0	0	1	Article
46741484	Role of Students in Global Health Delivery	MOUNT SINAI JOURNAL OF MEDICINE	8	10	Green OA article	Green OA	8	Kishore-SP	Kishore	Sandeep P.	Author, Reprint Author	1	WEILL-CORNELL-ROCKEFELLER-SLOAN-KETTERING-TRIINST	CORNELL-UNIV	CORNELL-UNIV	University	University - Rank 001-025	University - Rank 001-025	University - Rank 001-025	1	0	0	0	0	1	0	0	0	0	0	0	0	0	1	0	0	0	0	0	0	1	0	1	0	Article
47917894	Role of environmental poliovirus surveillance in global polio eradication and beyond	EPIDEMIOLOGY AND INFECTION	6	5	Green OA article	Green OA	6	DeGourville-EM	De Gourville	E. M.	Author	5	WHO	WHO	WHO	Non-profit	Non-profit	Non-profit	Non-profit	1	0	0	0	0	1	0	0	0	0	0	1	0	0	0	0	0	0	0	0	0	0	0	0	1	Review
50652826	Role of law at the non-communicable diseases-climate change interface: considerations for planetary and population health policy	PUBLIC HEALTH	3	2	Toll access article	Toll access	3	Colagiuri-R	Colagiuri	R.	Author	1	UNIV-SYDNEY	UNIV-SYDNEY	UNIV-SYDNEY	University	University - Rank 051-100	University - Rank 51-100	University - Rank 051-100	1	0	0	0	0	0	0	1	0	0	0	0	0	0	0	0	1	0	0	0	0	1	0	0	1	Article
51912897	SEPSIS AS A GLOBAL HEALTH PROBLEM-WHY WE NEED A GLOBAL SEPSIS ALLIANCE	SHOCK	2	1	Toll access article	Toll access	2	Reinhart-K	Reinhart	Konrad	Author, Reprint Author	1	UNIV-JENA	UNIV-JENA	UNIV-JENA	University	University: Unranked	University: Unranked	University: Unranked	1	0	0	0	0	0	0	1	0	0	0	0	0	0	0	0	0	0	0	0	1	1	0	0	1	Article
49214283	SOCIAL CLASS, POLITICS, AND THE SPIRIT LEVEL: WHY INCOME INEQUALITY REMAINS UNEXPLAINED AND UNSOLVED	INTERNATIONAL JOURNAL OF HEALTH SERVICES	4	4	Toll access article	Toll access	4	Chung-H	Chung	Haejoo	Author, Reprint Author	1	KOREA-UNIV	KOREA-UNIV	KOREA-UNIV	University	University - Rank 201-500	University - Rank 201-500	University - Rank 201-500	1	0	0	0	0	0	0	1	0	0	0	0	0	0	0	0	0	0	1	0	0	1	0	0	1	Article
49214288	SPECULATION ON COMMODITIES FUTURES MARKETS AND DESTABILIZATION OF GLOBAL FOOD PRICES: EXPLORING THE CONNECTIONS	INTERNATIONAL JOURNAL OF HEALTH SERVICES	3	3	Green OA article	Green OA	3	Pollin-R	Pollin	Robert	Author, Reprint Author	1	UNIV-MASSACHUSETTS	UNIV-MASSACHUSETTS	UNIV-MASSACHUSETTS	University	University - Rank 101-200	University - Rank 101-200	University - Rank 101-200	1	0	0	0	0	1	0	0	0	0	0	0	0	0	0	0	0	1	0	0	0	1	0	0	1	Article
48710779	STI epidemiology in the global older population: emerging challenges	PERSPECTIVES IN PUBLIC HEALTH	4	3	Toll access article	Toll access	4	Pitts-M	Pitts	Marian	Author	3	LA-TROBE-UNIV	LA-TROBE-UNIV	LA-TROBE-UNIV	University	University - Rank 201-500	University - Rank 201-500	University - Rank 201-500	1	0	0	0	0	0	0	1	0	0	0	0	0	0	0	0	0	0	1	0	0	1	0	0	1	Article
53249183	STRENGTHENING GLOBAL HEALTH SECURITY BY DEVELOPING CAPACITIES TO DEPLOY MEDICAL COUNTERMEASURES INTERNATIONALLY	BIOSECURITY AND BIOTERRORISM-BIODEFENSE STRATEGY PRACTICE AND SCIENCE	4	3	Green OA article	Green OA	4	Sherman-SE	Sherman	Susan E.	Author	3	US-DEPT-HHS	US-DEPT-HHS	US-DEPT-HHS	Government	Government	Government	Government	1	0	0	0	0	1	0	0	0	1	0	0	0	0	0	0	0	0	0	0	0	0	0	0	1	Article
48879431	Saving Lives for a Lifetime: Supporting Orphans and Vulnerable Children Impacted by HIV/AIDS	JAIDS-JOURNAL OF ACQUIRED IMMUNE DEFICIENCY SYNDROMES	8	7	Green OA article	Green OA	8	Howard-B	Howard	Brian	Author	7	USAID	USAID	USAID	Government	Government	Government	Government	1	0	0	0	0	1	0	0	0	1	0	0	0	0	0	0	0	0	0	0	0	0	0	0	1	Article
52583746	Scale, Causes, and Implications of the Primary Care Nursing Shortage	Annual Review of Public Health	6	3	Toll access article	Toll access	6	Fairman-J	Fairman	Julie	Author	1	UNIV-PENN	UNIV-PENN	UNIV-PENN	University	University - Rank 001-025	University - Rank 001-025	University - Rank 001-025	1	0	0	0	0	0	0	1	0	0	0	0	0	0	1	0	0	0	0	0	0	1	0	1	0	Review
53834984	Scaling Up Short-Term Humanitarian Surgery: A Global Surgery Elective for Senior Medical Students	JOURNAL OF SURGICAL EDUCATION	5	1	Toll access article	Toll access	5	Pettitt-BJ	Pettitt	Barbara J.	Author	1	EMORY-UNIV	EMORY-UNIV	EMORY-UNIV	University	University - Rank 051-100	University - Rank 51-100	University - Rank 051-100	1	0	0	0	0	0	0	1	0	0	0	0	0	0	0	0	1	0	0	0	0	1	0	0	1	Article
49933393	Scientific Publications and Research Groups on Alcohol Consumption and Related Problems Worldwide: Authorship Analysis of Papers Indexed in PubMed and Scopus Databases (2005 to 2009)	ALCOHOLISM-CLINICAL AND EXPERIMENTAL RESEARCH	7	7	Toll access article	Toll access	7	ValderramaZurian-JC	Carlos Valderrama-Zurian	Juan	Author	1	UNIDAD-INVEST-SOCIAL-&-SANIT	UNIDAD-INVEST-SOCIAL-&-SANIT	UNIDAD-INVEST-SOCIAL-&-SANIT	Non-profit	Non-profit	Non-profit	Non-profit	1	0	0	0	0	0	0	1	0	0	0	1	0	0	0	0	0	0	0	0	0	0	0	0	1	Article
52823385	Scientometric trends and knowledge maps of global health systems research	HEALTH RESEARCH POLICY AND SYSTEMS	9	3	Gold OA article (APC)	Gold OA	9	Liu-ZY	Liu	Zhi-yong	Author, Reprint Author	1	HUAZHONG-UNIV-SCI-&-TECHNOL	HUAZHONG-UNIV-SCI-&-TECHNOL	HUAZHONG-UNIV-SCI-&-TECHNOL	University	University - Rank 201-500	University - Rank 201-500	University - Rank 201-500	1	2300	0	1	0	0	0	0	0	0	0	0	0	0	0	0	0	0	1	0	0	1	1	0	1	Article
51942687	Scope of Global Health Training in US Obstetrics and Gynecology Residency Programs	OBSTETRICS AND GYNECOLOGY	6	9	Green OA article	Green OA	1	Hung-KJ	Hung	Kristin J.	Author, Reprint Author	1	BETH-ISRAEL-DEACONESS-MED-CTR	BETH-ISRAEL-DEACONESS-MED-CTR	BETH-ISRAEL-DEACONESS-MED-CTR	Hospital	University - Rank 001-025	University-Hospital	Hospital	1	0	0	0	0	1	0	0	0	0	1	0	0	0	0	0	0	0	0	0	0	0	0	0	1	Article
50799754	Setting priorities for stroke care and research	INTERNATIONAL JOURNAL OF STROKE	2	3	Green OA article	Green OA	2	Smith-WS	Smith	W. S.	Author	3	UNIV-CALIF-SAN-FRANCISCO	UCSF	UCSF	University	University - Rank 001-025	University - Rank 001-025	University - Rank 001-025	1	0	0	0	0	1	0	0	0	0	0	0	0	0	1	0	0	0	0	0	0	1	0	1	0	Article
53651804	Setting the One Health Agenda and the Human-Companion Animal Bond	INTERNATIONAL JOURNAL OF ENVIRONMENTAL RESEARCH AND PUBLIC HEALTH	2	2	Gold OA article (APC)	Gold OA	2	Day-MJ	Day	Michael J.	Author	2	UNIV-BRISTOL	UNIV-BRISTOL	UNIV-BRISTOL	University	University - Rank 051-100	University - Rank 51-100	University - Rank 051-100	1	1650.72	0	1	0	0	0	0	0	0	0	0	0	0	0	0	1	0	0	0	0	1	1	0	1	Review
52885441	Setting the Research Agenda in a Resource-Limited Setting-Viewpoint	JAIDS-JOURNAL OF ACQUIRED IMMUNE DEFICIENCY SYNDROMES	4	2	Green OA article	Green OA	4	Hakim-J	Hakim	James	Author	1	UNIV-ZIMBABWE	UNIV-ZIMBABWE	UNIV-ZIMBABWE	University	University: Unranked	University: Unranked	University: Unranked	1	0	0	0	0	1	0	0	0	0	0	0	0	0	0	0	0	0	0	0	1	1	0	0	1	Article
45050857	Seven Challenges in International Development Assistance for Health and Ways Forward	JOURNAL OF LAW MEDICINE & ETHICS	1	2	Green OA article	Green OA	1	Sridhar-D	Sridhar	Devi	Author, Reprint Author	1	UNIV-OXFORD-ALL-SOULS-COLL	UNIV-OXFORD	UNIV-OXFORD	University	University - Rank 001-025	University - Rank 001-025	University - Rank 001-025	1	0	0	0	0	1	0	0	0	0	0	0	0	0	1	0	0	0	0	0	0	1	0	1	0	Article
49819093	Shaping veterinary health policies in a global and evolving context	REVUE SCIENTIFIQUE ET TECHNIQUE DE L OFFICE INTERNATIONAL DES EPIZOOTIES	2	1	Toll access article	Toll access	2	MacInnes-T	MacInnes	T.	Author	1	CANADIAN-FOOD-INSPECT-AGCY	CANADIAN-FOOD-INSPECT-AGCY	CANADIAN-FOOD-INSPECT-AGCY	Government	Government	Government	Government	1	0	0	0	0	0	0	1	0	1	0	0	0	0	0	0	0	0	0	0	0	0	0	0	1	Article
44583226	Sharing health data: good intentions are not enough	BULLETIN OF THE WORLD HEALTH ORGANIZATION	2	2	Gold OA article (non-APC)	Gold OA	2	AbouZahr-C	AbouZahr	Carla	Author	2	WHO	WHO	WHO	Non-profit	Non-profit	Non-profit	Non-profit	1	0	0	0	1	0	0	0	0	0	0	1	0	0	0	0	0	0	0	0	0	0	0	0	1	Article
53145221	Shifts in population dietary patterns and physical inactivity as determinants of global trends in the prevalence of diabetes: An ecological analysis	NUTRITION METABOLISM AND CARDIOVASCULAR DISEASES	5	2	Toll access article	Toll access	5	Siervo-M	Siervo	M.	Author, Reprint Author	1	NEWCASTLE-UNIV	NEWCASTLE-UNIV	NEWCASTLE-UNIV	University	University - Rank 201-500	University - Rank 201-500	University - Rank 201-500	1	0	0	0	0	0	0	1	0	0	0	0	0	0	0	0	0	0	1	0	0	1	0	0	1	Article
46696280	Should Global Burden of Disease Estimates Include Depression as a Risk Factor for Coronary Heart Disease?	BMC MEDICINE	4	4	Gold OA article (APC)	Gold OA	4	Whiteford-HA	Whiteford	Harvey A.	Author, Reprint Author	1	QUEENSLAND-CTR-MENTAL-HLTH-RES	QUEENSLAND-CTR-MENTAL-HLTH-RES	QUEENSLAND-CTR-MENTAL-HLTH-RES	Research institute	Research Institute	Research Institute	Research Institute	1	2785	0	1	0	0	0	0	0	0	0	0	1	0	0	0	0	0	0	0	0	0	1	0	1	Article
46743162	Similarities and differences between spondyloarthritis in Asia and other parts of the world	CURRENT OPINION IN RHEUMATOLOGY	4	1	Toll access article	Toll access	4	Huang-F	Huang	Feng	Author, Reprint Author	1	CHINESE-PEOPLES-LIBERAT-ARMY-GEN-HOSP	CHINESE-PEOPLES-LIBERAT-ARMY-GEN-HOSP	CHINESE-PEOPLES-LIBERAT-ARMY-GEN-HOSP	Hospital	Hospital	Hospital	Hospital	1	0	0	0	0	0	0	1	0	0	1	0	0	0	0	0	0	0	0	0	0	0	0	0	1	Review
53207970	Simulation Use for Global Away Rotations (SUGAR): Preparing Residents for Emotional Challenges Abroad-A Multicenter Study	ACADEMIC PEDIATRICS	5	3	Green OA article	Green OA	5	Pitt-MB	Pitt	Michael B.	Author	2	UNIV-MINNESOTA	UNIV-MINNESOTA	UNIV-MINNESOTA	University	University - Rank 051-100	University - Rank 51-100	University - Rank 051-100	1	0	0	0	0	1	0	0	0	0	0	0	0	0	0	0	1	0	0	0	0	1	0	0	1	Article
49727885	Skin Cancer Risks Avoided by the Montreal Protocol-Worldwide Modeling Integrating Coupled Climate-Chemistry Models with a Risk Model for UV	PHOTOCHEMISTRY AND PHOTOBIOLOGY	12	5	Green OA article	Green OA	12	Bais-AF	Bais	Alkiviadis F.	Author	5	AUTH	ARISTOTLE-UNIV-THESSALONIKI	ARISTOTLE-UNIV-THESSALONIKI	University	University - Rank 201-500	University - Rank 201-500	University - Rank 201-500	1	0	0	0	0	1	0	0	0	0	0	0	0	0	0	0	0	0	1	0	0	1	0	0	1	Article
51848830	Sleeping with the enemy: the United Nations Development Programme and its position on the non-communicable disease epidemic	TROPICAL MEDICINE & INTERNATIONAL HEALTH	3	1	Hybrid article	Hybrid	3	Buragohain-A	Buragohain	Anita	Author	1	INT-UNION-TB-&-LUNG-DIS	INT-UNION-AGAINST-TUBERCULOSIS-&-LUNG-DIS-UNION	INT-UNION-AGAINST-TUBERCULOSIS-&-LUNG-DIS-UNION	Research institute	Research Institute	Research Institute	Research Institute	1	3000	0	0	0	0	1	0	0	0	0	0	1	0	0	0	0	0	0	0	0	0	1	0	1	Article
51788047	Smoking Prevalence and Cigarette Consumption in 187 Countries, 1980-2012	JAMA-JOURNAL OF THE AMERICAN MEDICAL ASSOCIATION	12	2	Delayed OA article	Delayed OA	12	Gakidou-E	Gakidou	Emmanuela	Author	1	UNIV-WASHINGTON	UNIV-WASHINGTON	UNIV-WASHINGTON	University	University - Rank 026-050	University - Rank 026-050	University - Rank 026-050	1	0	1	0	0	0	0	0	0	0	0	0	0	0	0	1	0	0	0	0	0	1	0	1	0	Article
46720293	Social Determinants of Smoking in Low- and Middle-Income Countries: Results from the World Health Survey	PLOS ONE	4	4	Gold OA article (APC)	Gold OA	4	Chatterji-S	Chatterji	Somnath	Author	1	WHO	WHO	WHO	Non-profit	Non-profit	Non-profit	Non-profit	1	1495	0	1	0	0	0	0	0	0	0	1	0	0	0	0	0	0	0	0	0	0	1	0	1	Article
46960246	Social accountability of medical education: Aspects on global accreditation	MEDICAL TEACHER	2	2	Toll access article	Toll access	2	Karle-H	Karle	Hans	Author	2	UNIV-COPENHAGEN	UNIV-COPENHAGEN	UNIV-COPENHAGEN	University	University - Rank 101-200	University - Rank 101-200	University - Rank 101-200	1	0	0	0	0	0	0	1	0	0	0	0	0	0	0	0	0	1	0	0	0	1	0	0	1	Article
51599043	Society for Academic Emergency Medicine's Global Emergency Medicine Academy: Global Health Elective Code of Conduct	ACADEMIC EMERGENCY MEDICINE	8	10	Hybrid article	Hybrid	8	Douglass-K	Douglass	Katherine	Author	8	GEORGE-WASHINGTON-UNIV	GEORGE-WASHINGTON-UNIV	GEORGE-WASHINGTON-UNIV	University	University - Rank 201-500	University - Rank 201-500	University - Rank 201-500	1	3000	0	0	0	0	1	0	0	0	0	0	0	0	0	0	0	0	1	0	0	1	1	0	1	Article
52013173	Socioeconomic Inequality in Disability Among Adults: A Multicountry Study Using the World Health Survey	AMERICAN JOURNAL OF PUBLIC HEALTH	8	4	Green OA article	Green OA	8	Chatterji-S	Chatterji	Somnath	Author, Reprint Author	1	WORLD-HLTH-ORG	WHO	WHO	Non-profit	Non-profit	Non-profit	Non-profit	1	0	0	0	0	1	0	0	0	0	0	1	0	0	0	0	0	0	0	0	0	0	0	0	1	Article
49538735	Socioeconomic inequalities in risk factors for non communicable diseases in low-income and middle-income countries: results from the World Health Survey	BMC PUBLIC HEALTH	9	6	Gold OA article (APC)	Gold OA	9	Chatterji-S	Chatterji	Somnath	Author	1	WHO	WHO	WHO	Non-profit	Non-profit	Non-profit	Non-profit	1	2145	0	1	0	0	0	0	0	0	0	1	0	0	0	0	0	0	0	0	0	0	1	0	1	Article
48593172	Socioeconomic inequality in domains of health: results from the World Health Surveys	BMC PUBLIC HEALTH	4	3	Gold OA article (APC)	Gold OA	4	Chatterji-S	Chatterji	Somnath	Author	1	WORLD-HLTH-ORG	WHO	WHO	Non-profit	Non-profit	Non-profit	Non-profit	1	2145	0	1	0	0	0	0	0	0	0	1	0	0	0	0	0	0	0	0	0	0	1	0	1	Article
53333085	Solutions for the Global Surgical Crisis: The Role of Family Medicine in Surgery, Obstetrics, and Anesthesia	FAMILY MEDICINE	3	3	Gold OA article (non-APC)	Gold OA	3	McQueen-KAK	McQueen	K. A. Kelly	Author	3	VANDERBILT-UNIV	VANDERBILT-UNIV	VANDERBILT-UNIV	University	University - Rank 101-200	University - Rank 101-200	University - Rank 101-200	1	0	0	0	1	0	0	0	0	0	0	0	0	0	0	0	0	1	0	0	0	1	0	0	1	Article
52896532	Spatial and Temporal Overview of Research in Pediatric and Congenital Cardiology: Trends and Global Challenges	PEDIATRIC CARDIOLOGY	5	2	Toll access article	Toll access	5	Diller-GP	Diller	Gerhard-Paul	Author, Reprint Author	1	UNIV-HOSP-MUENSTER	UNIV-HOSP-MUENSTER	UNIV-HOSP-MUENSTER	Hospital	University: Unranked	University-Hospital	Hospital	1	0	0	0	0	0	0	1	0	0	1	0	0	0	0	0	0	0	0	0	0	0	0	0	1	Article
47225605	Spatial epidemiology and spatial ecology study of worldwide drug-resistant tuberculosis	INTERNATIONAL JOURNAL OF HEALTH GEOGRAPHICS	8	2	Gold OA article (APC)	Gold OA	8	Xue-FZ	Xue	Fuzhong	Author, Reprint Author	1	SHANDONG-UNIV	SHANDONG-UNIV	SHANDONG-UNIV	University	University: Unranked	University: Unranked	University: Unranked	1	2145	0	1	0	0	0	0	0	0	0	0	0	0	0	0	0	0	0	0	1	1	1	0	1	Article
51852377	Spectrometric analysis of mercury content in 549 skin-lightening products: Is mercury toxicity a hidden global health hazard?	JOURNAL OF THE AMERICAN ACADEMY OF DERMATOLOGY	9	8	Toll access article	Toll access	9	Hamann-D	Hamann	Dathan	Author	8	UNIV-ARIZONA	UNIV-ARIZONA	UNIV-ARIZONA	University	University - Rank 101-200	University - Rank 101-200	University - Rank 101-200	1	0	0	0	0	0	0	1	0	0	0	0	0	0	0	0	0	1	0	0	0	1	0	0	1	Article
49807454	Spirometric testing on World COPD Day	INTERNATIONAL JOURNAL OF CHRONIC OBSTRUCTIVE PULMONARY DISEASE	3	2	Gold OA article (APC)	Gold OA	3	Sonc-S	Sonc	Silvana	Author	1	HOSP-SEZANA	HOSP-SEZANA	HOSP-SEZANA	Hospital	Hospital	Hospital	Hospital	1	2310	0	1	0	0	0	0	0	0	1	0	0	0	0	0	0	0	0	0	0	0	1	0	1	Review
53440348	Stakeholders in One Health	REVUE SCIENTIFIQUE ET TECHNIQUE DE L OFFICE INTERNATIONAL DES EPIZOOTIES	3	3	Toll access article	Toll access	3	Keyyu-JD	Keyyu	J. D.	Author	3	TANZANIA-WILDLIFE-RES-INST	TANZANIA-WILDLIFE-RES-INST	TANZANIA-WILDLIFE-RES-INST	Research institute	Research Institute	Research Institute	Research Institute	1	0	0	0	0	0	0	1	0	0	0	0	1	0	0	0	0	0	0	0	0	0	0	0	1	Article
53567635	Standards for the Uniform Reporting of Hypertension in Adults Using Population Survey Data: Recommendations From the World Hypertension League Expert Committee	JOURNAL OF CLINICAL HYPERTENSION	12	17	Hybrid article	Hybrid	12	Zhang-XH	Zhang	Xin-Hua	Author	3	WORLD-HYPERTENS-LEAGUE	WORLD-HYPERTENS-LEAGUE	WORLD-HYPERTENS-LEAGUE	Non-profit	Non-profit	Non-profit	Non-profit	1	3000	0	0	0	0	1	0	0	0	0	1	0	0	0	0	0	0	0	0	0	0	1	0	1	Article
47031618	Status of Global Virologic Surveillance for Rubella Viruses	JOURNAL OF INFECTIOUS DISEASES	27	19	Hybrid article	Hybrid	27	Icenogle-JP	Icenogle	Joseph P.	Author, Reprint Author	1	CTR-DIS-CONTROL-&-PREVENT	CDC	CDC	Government	Government	Government	Government	1	3500	0	0	0	0	1	0	0	1	0	0	0	0	0	0	0	0	0	0	0	0	1	0	1	Article
43926177	Stopping tuberculosis in the 21st century: Goals and strategies	RESPIROLOGY	2	1	Toll access article	Toll access	2	Raviglione-M	Raviglione	Mario	Author	1	WHO	WHO	WHO	Non-profit	Non-profit	Non-profit	Non-profit	1	0	0	0	0	0	0	1	0	0	0	1	0	0	0	0	0	0	0	0	0	0	0	0	1	Review
46741491	Strategic, Value-Based Delivery in Global Health Care: Innovations at Harvard University and Brigham and Women's Hospital	MOUNT SINAI JOURNAL OF MEDICINE	10	4	Toll access article	Toll access	10	Rhatigan-J	Rhatigan	Joseph	Author	1	BRIGHAM-&-WOMENS-HOSP	BRIGHAM-&-WOMENS-HOSP	BRIGHAM-&-WOMENS-HOSP	Hospital	University - Rank 001-025	University-Hospital	Hospital	1	0	0	0	0	0	0	1	0	0	1	0	0	0	0	0	0	0	0	0	0	0	0	0	1	Article
52285042	Strengthening of Oral Health Systems: Oral Health through Primary Health Care	MEDICAL PRINCIPLES AND PRACTICE	1	1	Gold OA article (non-APC)	Gold OA	1	Petersen-PE	Petersen	Poul Erik	Author, Reprint Author	1	WHO	WHO	WHO	Non-profit	Non-profit	Non-profit	Non-profit	1	0	0	0	1	0	0	0	0	0	0	1	0	0	0	0	0	0	0	0	0	0	0	0	1	Article
51597459	Strengthening the evidence-policy interface for patient safety: enhancing global health through hospital partnerships	GLOBALIZATION AND HEALTH	9	4	Gold OA article (APC)	Gold OA	9	Pittet-D	Pittet	Didier	Author	1	WHO	WHO	WHO	Non-profit	Non-profit	Non-profit	Non-profit	1	2145	0	1	0	0	0	0	0	0	0	1	0	0	0	0	0	0	0	0	0	0	1	0	1	Article
49506288	Strengthening the quality agenda in health care in low- and middle-income countries: questions to consider	INTERNATIONAL JOURNAL FOR QUALITY IN HEALTH CARE	5	5	Hybrid article	Hybrid	4	Fortune-T	Fortune	Triona	Author	5	INT-SOC-QUAL-HLTH-CARE	INT-SOC-QUAL-HLTH-CARE	INT-SOC-QUAL-HLTH-CARE	Scientific association	Scientific association	Scientific association	Scientific association	1	2800	0	0	0	0	1	0	0	0	0	0	0	1	0	0	0	0	0	0	0	0	1	0	1	Article
44797165	Stroke: Working toward a Prioritized World Agenda	CEREBROVASCULAR DISEASES	53	52	Green OA article	Green OA	52	Leys-D	Leys	Didier	Author	52	UNIV-LILLE-NORD-FRANCE	UNIV-LILLE	UNIV-LILLE	University	University - Rank 201-500	University - Rank 201-500	University - Rank 201-500	1	0	0	0	0	1	0	0	0	0	0	0	0	0	0	0	0	0	1	0	0	1	0	0	1	Article
49718883	Structured Global Health Programs in US Medical Schools: A Web-Based Review of Certificates, Tracks, and Concentrations	ACADEMIC MEDICINE	4	2	Toll access article	Toll access	4	Rohrbaugh-RM	Rohrbaugh	Robert M.	Author	2	OFF-INT-MED-STUDENT-EDUC	YALE-UNIV	YALE-UNIV	University	University - Rank 001-025	University - Rank 001-025	University - Rank 001-025	1	0	0	0	0	0	0	1	0	0	0	0	0	0	1	0	0	0	0	0	0	1	0	1	0	Review
49146511	Student Objectives and Learning Experiences in a Global Health Elective	JOURNAL OF COMMUNITY HEALTH	3	4	Toll access article	Toll access	3	Koyfman-A	Koyfman	Alex	Author	3	BRIGHAM-&-WOMENS-HOSP	BRIGHAM-&-WOMENS-HOSP	BRIGHAM-&-WOMENS-HOSP	Hospital	University - Rank 001-025	University-Hospital	Hospital	1	0	0	0	0	0	0	1	0	0	1	0	0	0	0	0	0	0	0	0	0	0	0	0	1	Article
51988238	Student Perceptions About the Mission of Dental Schools to Advance Global Dentistry and Philanthropy	JOURNAL OF DENTAL EDUCATION	5	7	Hybrid article	Hybrid	5	Proctor-HL	Proctor	Hannah L.	Author	7	UNIV-TENNESSEE	UNIV-TENNESSEE	UNIV-TENNESSEE	University	University - Rank 201-500	University - Rank 201-500	University - Rank 201-500	1		0	0	0	0	1	0	0	0	0	0	0	0	0	0	0	0	1	0	0	1	1	0	1	Article
51039083	Study Abroad Programs: Using Alumni and Graduate Students as Affiliate Faculty	NURSE EDUCATOR	5	1	Toll access article	Toll access	5	delaCruz-K	de la Cruz	Karen	Author	1	BRIGHAM-YOUNG-UNIV	BRIGHAM-YOUNG-UNIV	BRIGHAM-YOUNG-UNIV	University	University: Unranked	University: Unranked	University: Unranked	1	0	0	0	0	0	0	1	0	0	0	0	0	0	0	0	0	0	0	0	1	1	0	0	1	Article
[truncated: 328 more rows]
